# Supplementary material for: Trifunctional fatty acid derivatives: the impact of diazirine placement
Source: Royal Society of Chemistry journal article supplement (doi:10.1039/d4cc00974f), 2024-01-01
Supplement: d4cc00974f1.csv [file d4cc00974f1.csv]

gene_name	protein_id	description	found.in.files	found.in.file_P2096_3prc_TMTpro_Zelda_220516_P2096_PH_FS_set02_TMT16plex_3prc_T_R1_results_20220518_1229_proteins.txt	found.in.file_P2096_3prc_TMTpro_Zelda_220516_P2096_PH_FS_set03_TMT16plex_3prc_T_R1_results_20220518_1233_proteins.txt	found.in.files_Huh7	found.in.files_THP1	found.in.conditions	found.in.conditions_Huh7	found.in.conditions_THP1	found.in.reps	found.in.reps_Huh7	found.in.reps_THP1	max.qupm	max.qupm_Huh7	max.qupm_THP1	average.top3	average.top3_Huh7	average.top3_THP1	keep_Huh7	keep_THP1	keep	logFC	AveExpr	t	pvalue.limma	fdr.limma	B	pvalue.fdrtool	qval.fdrtool	lfdr.fdrtool	comparison	sample	hit_annotation_method	pvalue	fdr	hit	hit_annotation	top3
ECH1	Q13011	Delta(3,5)-Delta(2,4)-dienoyl-CoA isomerase, mitochondrial OS=Homo sapiens GN=ECH1 PE=1 SV=2	2	1	1	1	1	8	8	8	2	2	2	10	4	10	7.53804	7.3647	7.71138	TRUE	TRUE	TRUE	2.664716975	24.2698604	13.96182284	3.70E-08	4.18E-05	8.025270096	8.82E-12	1	1	FA_8_3_UV - FA_8_3_noUV	Huh7	limma	3.70E-08	4.18E-05	TRUE	enriched hit	7.3647
VDAC2	A0A0A0MR02|P45880|P45880-1|P45880-2|Q5JSD1|Q5JSD2	Isoform 1 of Voltage-dependent anion-selective channel protein 2 OS=Homo sapiens GN=VDAC2|Isoform 2 of Voltage-dependent anion-selective channel protein 2 OS=Homo sapiens GN=VDAC2|Voltage-dependent anion-selective channel protein 2 (Fragment) OS=Homo sapiens GN=VDAC2 PE=1 SV=1|Voltage-dependent anion-selective channel protein 2 (Fragment) OS=Homo sapiens GN=VDAC2 PE=1 SV=7|Voltage-dependent anion…	2	1	1	1	1	8	8	8	2	2	2	5	2	5	6.352165	6.01619	6.68814	TRUE	TRUE	TRUE	1.74775987	22.82293116	8.495023678	4.74E-06	0.002674463	4.40132073	3.29E-05	1	1	FA_8_3_UV - FA_8_3_noUV	Huh7	limma	4.74E-06	0.002674463	TRUE	enriched hit	6.01619
VDAC1	C9JI87|P21796	Voltage-dependent anion-selective channel protein 1 (Fragment) OS=Homo sapiens GN=VDAC1 PE=1 SV=5|Voltage-dependent anion-selective channel protein 1 OS=Homo sapiens GN=VDAC1 PE=1 SV=2	2	1	1	1	1	8	8	8	2	2	2	10	2	10	6.47537	6.10218	6.84856	TRUE	TRUE	TRUE	1.478023645	23.40203553	6.106409646	9.00E-05	0.03387479	1.798366756	0.002837517	1	1	FA_8_3_UV - FA_8_3_noUV	Huh7	limma	9.00E-05	0.03387479	TRUE	enriched hit	6.10218
PITPNB	A0A0A0MSW4|P48739|P48739-2|P48739-3	Isoform 2 of Phosphatidylinositol transfer protein beta isoform OS=Homo sapiens GN=PITPNB|Isoform 3 of Phosphatidylinositol transfer protein beta isoform OS=Homo sapiens GN=PITPNB|Phosphatidylinositol transfer protein beta isoform OS=Homo sapiens GN=PITPNB PE=1 SV=1|Phosphatidylinositol transfer protein beta isoform OS=Homo sapiens GN=PITPNB PE=1 SV=2	2	1	1	1	1	8	8	8	2	2	2	3	2	3	6.46135	6.43433	6.48837	TRUE	TRUE	TRUE	1.276312876	23.49127191	5.356884224	2.63E-04	0.074320251	0.801141928	0.008833153	1	1	FA_8_3_UV - FA_8_3_noUV	Huh7	limma	2.63E-04	0.074320251	FALSE	enriched candidate	6.43433
ACOX1	Q15067|Q15067-2|Q15067-3	Peroxisomal acyl-coenzyme A oxidase 1 OS=Homo sapiens GN=ACOX1 PE=1 SV=3|Isoform 2 of Peroxisomal acyl-coenzyme A oxidase 1 OS=Homo sapiens GN=ACOX1|Isoform 3 of Peroxisomal acyl-coenzyme A oxidase 1 OS=Homo sapiens GN=ACOX1	2	1	1	1	1	8	8	8	2	2	2	4	4	2	6.38058	6.69587	6.06529	TRUE	TRUE	TRUE	0.928759296	24.43255941	4.99012629	4.58E-04	0.102903964	0.279484954	0.014720889	1	1	FA_8_3_UV - FA_8_3_noUV	Huh7	limma	4.58E-04	0.102903964	FALSE	enriched candidate	6.69587
ECHS1	P30084	Enoyl-CoA hydratase, mitochondrial OS=Homo sapiens GN=ECHS1 PE=1 SV=4	2	1	1	1	1	8	8	8	2	2	2	8	3	8	7.380795	7.55474	7.20685	TRUE	TRUE	TRUE	0.766220518	23.89288135	4.875742302	5.47E-04	0.102903964	0.112313026	0.017159938	1	1	FA_8_3_UV - FA_8_3_noUV	Huh7	limma	5.47E-04	0.102903964	FALSE	enriched candidate	7.55474
HADHA	P40939	Trifunctional enzyme subunit alpha, mitochondrial OS=Homo sapiens GN=HADHA PE=1 SV=2	2	1	1	1	1	8	8	8	2	2	2	11	11	10	6.995835	7.16581	6.82586	TRUE	TRUE	TRUE	0.5132901	25.8667038	4.555199192	9.06E-04	0.129763341	-0.367189064	0.025975266	1	1	FA_8_3_UV - FA_8_3_noUV	Huh7	limma	9.06E-04	0.129763341	FALSE	no hit	7.16581
PGAM1	P18669	Phosphoglycerate mutase 1 OS=Homo sapiens GN=PGAM1 PE=1 SV=2	2	1	1	1	1	8	8	8	2	2	2	5	4	5	6.81637	6.73736	6.89538	TRUE	TRUE	TRUE	-0.818936909	24.25970211	-4.501828435	9.87E-04	0.129763341	-0.448563035	0.027771884	1	1	FA_8_3_UV - FA_8_3_noUV	Huh7	limma	9.87E-04	0.129763341	FALSE	no hit	6.73736
AASS	F8WAH1|Q9UDR5	Alpha-aminoadipic semialdehyde synthase, mitochondrial OS=Homo sapiens GN=AASS PE=1 SV=1|Alpha-aminoadipic semialdehyde synthase, mitochondrial OS=Homo sapiens GN=AASS PE=1 SV=1	1	1	NA	1	NA	8	8	NA	2	2	NA	2	2	NA	6.2238	6.2238	NA	TRUE	FALSE	TRUE	0.488481384	23.39146695	4.47275995	0.001034429	0.129763341	-0.493062769	0.028794757	1	1	FA_8_3_UV - FA_8_3_noUV	Huh7	limma	0.001034429	0.129763341	FALSE	no hit	6.2238
HSDL2	Q6YN16|Q6YN16-2	Hydroxysteroid dehydrogenase-like protein 2 OS=Homo sapiens GN=HSDL2 PE=1 SV=1|Isoform 2 of Hydroxysteroid dehydrogenase-like protein 2 OS=Homo sapiens GN=HSDL2	1	1	NA	1	NA	8	8	NA	2	2	NA	3	3	NA	6.12781	6.12781	NA	TRUE	FALSE	TRUE	0.610660174	24.11966805	4.025894805	0.002152005	0.242961312	-1.192206648	0.04908445	1	1	FA_8_3_UV - FA_8_3_noUV	Huh7	limma	0.002152005	0.242961312	FALSE	no hit	6.12781
IDH3B	A0A087WZN1|A0A087X2E5|O43837|O43837-2	Isocitrate dehydrogenase [NAD] subunit, mitochondrial OS=Homo sapiens GN=IDH3B PE=1 SV=1|Isocitrate dehydrogenase [NAD] subunit, mitochondrial OS=Homo sapiens GN=IDH3B PE=1 SV=1|Isocitrate dehydrogenase [NAD] subunit beta, mitochondrial OS=Homo sapiens GN=IDH3B PE=1 SV=2|Isoform A of Isocitrate dehydrogenase [NAD] subunit beta, mitochondrial OS=Homo sapiens GN=IDH3B	1	1	NA	1	NA	8	8	NA	2	2	NA	3	3	NA	6.7239	6.7239	NA	TRUE	FALSE	TRUE	0.395130792	23.13146069	3.84632899	0.002909066	0.277503638	-1.480395835	0.060096412	1	1	FA_8_3_UV - FA_8_3_noUV	Huh7	limma	0.002909066	0.277503638	FALSE	no hit	6.7239
STRAP	Q9Y3F4|Q9Y3F4-2	Serine-threonine kinase receptor-associated protein OS=Homo sapiens GN=STRAP PE=1 SV=1|Isoform 2 of Serine-threonine kinase receptor-associated protein OS=Homo sapiens GN=STRAP	2	1	1	1	1	8	8	8	2	2	2	8	8	7	6.620885	6.94135	6.30042	TRUE	TRUE	TRUE	-0.556502353	25.26821353	-3.838148892	0.002949552	0.277503638	-1.493611597	0.060643311	1	1	FA_8_3_UV - FA_8_3_noUV	Huh7	limma	0.002949552	0.277503638	FALSE	no hit	6.94135
CNBP	P62633|P62633-2|P62633-3|P62633-7	Cellular nucleic acid-binding protein OS=Homo sapiens GN=CNBP PE=1 SV=1|Isoform 2 of Cellular nucleic acid-binding protein OS=Homo sapiens GN=CNBP|Isoform 3 of Cellular nucleic acid-binding protein OS=Homo sapiens GN=CNBP|Isoform 7 of Cellular nucleic acid-binding protein OS=Homo sapiens GN=CNBP	2	1	1	1	1	8	8	8	2	2	2	4	4	2	6.807585	7.08175	6.53342	TRUE	TRUE	TRUE	-0.580426035	24.32863328	-3.69774885	0.003743519	0.308824581	-1.721525976	0.070690643	1	1	FA_8_3_UV - FA_8_3_noUV	Huh7	limma	0.003743519	0.308824581	FALSE	no hit	7.08175
PCNA	P12004	Proliferating cell nuclear antigen OS=Homo sapiens GN=PCNA PE=1 SV=1	2	1	1	1	1	8	8	8	2	2	2	7	7	4	7.4622	7.8818	7.0426	TRUE	TRUE	TRUE	-0.479467868	25.81747949	-3.537270045	0.004928287	0.308824581	-1.984288705	0.083805946	1	1	FA_8_3_UV - FA_8_3_noUV	Huh7	limma	0.004928287	0.308824581	FALSE	no hit	7.8818
TXNL1	K7ER96|O43396	Thioredoxin-like protein 1 (Fragment) OS=Homo sapiens GN=TXNL1 PE=1 SV=1|Thioredoxin-like protein 1 OS=Homo sapiens GN=TXNL1 PE=1 SV=3	2	1	1	1	1	8	8	8	2	2	2	2	2	2	6.379685	6.39552	6.36385	TRUE	TRUE	TRUE	-0.611739785	23.70176853	-3.530869468	0.004982888	0.308824581	-1.994812549	0.084367386	1	1	FA_8_3_UV - FA_8_3_noUV	Huh7	limma	0.004982888	0.308824581	FALSE	no hit	6.39552
RBM17	Q96I25	Splicing factor 45 OS=Homo sapiens GN=RBM17 PE=1 SV=1	1	1	NA	1	NA	8	8	NA	2	2	NA	2	2	NA	5.97573	5.97573	NA	TRUE	FALSE	TRUE	0.576627878	22.85423754	3.513973439	0.005130038	0.308824581	-2.022607696	0.085864086	1	1	FA_8_3_UV - FA_8_3_noUV	Huh7	limma	0.005130038	0.308824581	FALSE	no hit	5.97573
ATP6V0D1	F5GYQ1|J3QL14|P61421|R4GN72	V-type proton ATPase subunit d 1 OS=Homo sapiens GN=ATP6V0D1 PE=1 SV=1|V-type proton ATPase subunit d 1 (Fragment) OS=Homo sapiens GN=ATP6V0D1 PE=1 SV=1|V-type proton ATPase subunit d 1 OS=Homo sapiens GN=ATP6V0D1 PE=1 SV=1|V-type proton ATPase subunit d 1 OS=Homo sapiens GN=ATP6V0D1 PE=1 SV=1	1	1	NA	1	NA	8	8	NA	2	2	NA	4	4	NA	7.04347	7.04347	NA	TRUE	FALSE	TRUE	0.532065261	24.76842963	3.487200872	0.005372437	0.308824581	-2.066692715	0.088279544	1	1	FA_8_3_UV - FA_8_3_noUV	Huh7	limma	0.005372437	0.308824581	FALSE	no hit	7.04347
MDH2	P40926	Malate dehydrogenase, mitochondrial OS=Homo sapiens GN=MDH2 PE=1 SV=3	2	1	1	1	1	8	8	8	2	2	2	17	13	17	7.791625	7.88493	7.69832	TRUE	TRUE	TRUE	0.404079053	26.87334092	3.485791097	0.005385523	0.308824581	-2.069015516	0.088408239	1	1	FA_8_3_UV - FA_8_3_noUV	Huh7	limma	0.005385523	0.308824581	FALSE	no hit	7.88493
POLR1B	H7C0D9|Q9H9Y6|Q9H9Y6-2|Q9H9Y6-3|Q9H9Y6-4|Q9H9Y6-5	DNA-directed RNA polymerase I subunit RPA2 (Fragment) OS=Homo sapiens GN=POLR1B PE=1 SV=7|DNA-directed RNA polymerase I subunit RPA2 OS=Homo sapiens GN=POLR1B PE=1 SV=2|Isoform 2 of DNA-directed RNA polymerase I subunit RPA2 OS=Homo sapiens GN=POLR1B|Isoform 3 of DNA-directed RNA polymerase I subunit RPA2 OS=Homo sapiens GN=POLR1B|Isoform 4 of DNA-directed RNA polymerase I subunit RPA2 OS=Homo sa…	1	1	NA	1	NA	8	8	NA	2	2	NA	2	2	NA	6.30346	6.30346	NA	TRUE	FALSE	TRUE	0.512364949	22.29636305	3.448490236	0.005743956	0.308824581	-2.130522644	0.091868625	1	1	FA_8_3_UV - FA_8_3_noUV	Huh7	limma	0.005743956	0.308824581	FALSE	no hit	6.30346
PECR	Q9BY49	Peroxisomal trans-2-enoyl-CoA reductase OS=Homo sapiens GN=PECR PE=1 SV=2	1	1	NA	1	NA	8	8	NA	2	2	NA	2	2	NA	6.58901	6.58901	NA	TRUE	FALSE	TRUE	0.527179406	24.03335448	3.431347971	0.005916822	0.308824581	-2.158819632	0.093494996	1	1	FA_8_3_UV - FA_8_3_noUV	Huh7	limma	0.005916822	0.308824581	FALSE	no hit	6.58901
PPP2CB	P62714	Serine/threonine-protein phosphatase 2A catalytic subunit beta isoform OS=Homo sapiens GN=PPP2CB PE=1 SV=1	2	1	1	1	1	8	8	8	2	2	2	3	3	3	6.450175	6.573	6.32735	TRUE	TRUE	TRUE	-0.342447723	24.14355689	-3.41142628	0.00612445	0.308824581	-2.191727377	0.095413999	1	1	FA_8_3_UV - FA_8_3_noUV	Huh7	limma	0.00612445	0.308824581	FALSE	no hit	6.573
RNPEP	Q9H4A4	Aminopeptidase B OS=Homo sapiens GN=RNPEP PE=1 SV=2	2	1	1	1	1	8	8	8	2	2	2	10	3	10	6.37175	5.686	7.0575	TRUE	TRUE	TRUE	-0.483599013	22.56837216	-3.408069892	0.006160161	0.308824581	-2.197273973	0.095740394	1	1	FA_8_3_UV - FA_8_3_noUV	Huh7	limma	0.006160161	0.308824581	FALSE	no hit	5.686
PSMA6	G3V295|G3V5Z7|P60900	Proteasome subunit alpha type-6 OS=Homo sapiens GN=PSMA6 PE=1 SV=1|Proteasome subunit alpha type OS=Homo sapiens GN=PSMA6 PE=1 SV=1	2	1	1	1	1	8	8	8	2	2	2	7	4	7	6.73039	6.74208	6.7187	TRUE	TRUE	TRUE	-0.693623971	24.30855549	-3.370475412	0.006575074	0.308824581	-2.259444351	0.099457703	1	1	FA_8_3_UV - FA_8_3_noUV	Huh7	limma	0.006575074	0.308824581	FALSE	no hit	6.74208
TRAP1	Q12931|Q12931-2	Heat shock protein 75 kDa, mitochondrial OS=Homo sapiens GN=TRAP1 PE=1 SV=3|Isoform 2 of Heat shock protein 75 kDa, mitochondrial OS=Homo sapiens GN=TRAP1	2	1	1	1	1	8	8	8	2	2	2	13	10	13	7.091335	7.38084	6.80183	TRUE	TRUE	TRUE	0.351975507	26.26454583	3.357648687	0.006723108	0.308824581	-2.280673531	0.100752031	1	1	FA_8_3_UV - FA_8_3_noUV	Huh7	limma	0.006723108	0.308824581	FALSE	no hit	7.38084
ME2	P23368	NAD-dependent malic enzyme, mitochondrial OS=Homo sapiens GN=ME2 PE=1 SV=1	2	1	1	1	1	8	8	8	2	2	2	6	5	6	6.810415	7.04486	6.57597	TRUE	TRUE	TRUE	0.416208315	24.41599884	3.342007085	0.006908263	0.308824581	-2.306572859	0.102348529	1	1	FA_8_3_UV - FA_8_3_noUV	Huh7	limma	0.006908263	0.308824581	FALSE	no hit	7.04486
CLTA	P09496|P09496-2|P09496-3|P09496-4	Clathrin light chain A OS=Homo sapiens GN=CLTA PE=1 SV=1|Isoform 3 of Clathrin light chain A OS=Homo sapiens GN=CLTA|Isoform 4 of Clathrin light chain A OS=Homo sapiens GN=CLTA|Isoform Non-brain of Clathrin light chain A OS=Homo sapiens GN=CLTA	2	1	1	1	1	8	8	8	2	2	2	5	5	3	6.91948	7.18778	6.65118	TRUE	TRUE	TRUE	-0.576110154	24.5878844	-3.325285215	0.007111992	0.308824581	-2.334274024	0.104077482	1	1	FA_8_3_UV - FA_8_3_noUV	Huh7	limma	0.007111992	0.308824581	FALSE	no hit	7.18778
ARF4	P18085	ADP-ribosylation factor 4 OS=Homo sapiens GN=ARF4 PE=1 SV=3	1	1	NA	1	NA	8	8	NA	2	2	NA	3	3	NA	6.81722	6.81722	NA	TRUE	FALSE	TRUE	-0.327593633	24.81118901	-3.30119599	0.007416352	0.310113369	-2.37420226	0.106608879	1	1	FA_8_3_UV - FA_8_3_noUV	Huh7	limma	0.007416352	0.310113369	FALSE	no hit	6.81722
HADH	A0A0A0MSE2|E9PF18|Q16836|Q16836-2|Q16836-3	Hydroxyacyl-coenzyme A dehydrogenase, mitochondrial OS=Homo sapiens GN=HADH PE=1 SV=1|Hydroxyacyl-coenzyme A dehydrogenase, mitochondrial OS=Homo sapiens GN=HADH PE=1 SV=1|Hydroxyacyl-coenzyme A dehydrogenase, mitochondrial OS=Homo sapiens GN=HADH PE=1 SV=3|Isoform 2 of Hydroxyacyl-coenzyme A dehydrogenase, mitochondrial OS=Homo sapiens GN=HADH|Isoform 3 of Hydroxyacyl-coenzyme A dehydrogenase, m…	2	1	1	1	1	8	8	8	2	2	2	5	2	5	6.568815	6.18319	6.95444	TRUE	TRUE	TRUE	0.374735946	23.76620884	3.254477071	0.008045176	0.312043119	-2.451707395	0.111657207	1	1	FA_8_3_UV - FA_8_3_noUV	Huh7	limma	0.008045176	0.312043119	FALSE	no hit	6.18319
RRM1	P23921	Ribonucleoside-diphosphate reductase large subunit OS=Homo sapiens GN=RRM1 PE=1 SV=1	1	1	NA	1	NA	8	8	NA	2	2	NA	8	8	NA	7.0458	7.0458	NA	TRUE	FALSE	TRUE	-0.507382577	24.98540766	-3.247489312	0.008143809	0.312043119	-2.463306767	0.112428243	1	1	FA_8_3_UV - FA_8_3_noUV	Huh7	limma	0.008143809	0.312043119	FALSE	no hit	7.0458
ATP6V1H	Q9UI12	V-type proton ATPase subunit H OS=Homo sapiens GN=ATP6V1H PE=1 SV=1	1	1	NA	1	NA	8	8	NA	2	2	NA	3	3	NA	6.52238	6.52238	NA	TRUE	FALSE	TRUE	0.382164978	23.72328091	3.237174242	0.008291668	0.312043119	-2.480432301	0.113574081	1	1	FA_8_3_UV - FA_8_3_noUV	Huh7	limma	0.008291668	0.312043119	FALSE	no hit	6.52238
GNA11|GNAQ	K7EL62|P29992|P50148	Guanine nucleotide-binding protein subunit alpha-11 (Fragment) OS=Homo sapiens GN=GNA11 PE=1 SV=1|Guanine nucleotide-binding protein subunit alpha-11 OS=Homo sapiens GN=GNA11 PE=1 SV=2|Guanine nucleotide-binding protein G(q) subunit alpha OS=Homo sapiens GN=GNAQ PE=1 SV=4	1	1	NA	1	NA	8	8	NA	2	2	NA	2	2	NA	5.75279	5.75279	NA	TRUE	FALSE	TRUE	0.498940718	22.3883562	3.131678178	0.009970572	0.363121786	-2.65574206	0.125827659	1	1	FA_8_3_UV - FA_8_3_noUV	Huh7	limma	0.009970572	0.363121786	FALSE	no hit	5.75279
HSD17B10	Q99714	3-hydroxyacyl-CoA dehydrogenase type-2 OS=Homo sapiens GN=HSD17B10 PE=1 SV=3	2	1	1	1	1	8	8	8	2	2	2	4	3	4	6.77919	6.86769	6.69069	TRUE	TRUE	TRUE	0.36441802	24.62151853	3.111641435	0.010326633	0.364336503	-2.689061381	0.128267283	1	1	FA_8_3_UV - FA_8_3_noUV	Huh7	limma	0.010326633	0.364336503	FALSE	no hit	6.86769
DDX39A	O00148	ATP-dependent RNA helicase DDX39A OS=Homo sapiens GN=DDX39A PE=1 SV=2	1	1	NA	1	NA	8	8	NA	2	2	NA	4	4	NA	7.17084	7.17084	NA	TRUE	FALSE	TRUE	0.516209597	24.09871572	3.063793404	0.011230056	0.374641965	-2.768640661	0.134241831	1	1	FA_8_3_UV - FA_8_3_noUV	Huh7	limma	0.011230056	0.374641965	FALSE	no hit	7.17084
POR	H0Y4R2|P16435	NADPH--cytochrome P450 reductase (Fragment) OS=Homo sapiens GN=POR PE=1 SV=1|NADPH--cytochrome P450 reductase OS=Homo sapiens GN=POR PE=1 SV=2	2	1	1	1	1	8	8	8	2	2	2	7	7	2	6.839615	7.00532	6.67391	TRUE	TRUE	TRUE	0.37769653	25.70913551	3.039619792	0.011716548	0.374641965	-2.80884683	0.137340987	1	1	FA_8_3_UV - FA_8_3_noUV	Huh7	limma	0.011716548	0.374641965	FALSE	no hit	7.00532
HMGCL	P35914	Hydroxymethylglutaryl-CoA lyase, mitochondrial OS=Homo sapiens GN=HMGCL PE=1 SV=2	2	1	1	1	1	8	8	8	2	2	2	3	3	3	6.752395	7.25036	6.25443	TRUE	TRUE	TRUE	0.434072693	24.51228837	3.014210229	0.012250946	0.374641965	-2.851105623	0.140657775	1	1	FA_8_3_UV - FA_8_3_noUV	Huh7	limma	0.012250946	0.374641965	FALSE	no hit	7.25036
TARS	P26639|P26639-2	Threonine--tRNA ligase, cytoplasmic OS=Homo sapiens GN=TARS PE=1 SV=3|Isoform 2 of Threonine--tRNA ligase, cytoplasmic OS=Homo sapiens GN=TARS	2	1	1	1	1	8	8	8	2	2	2	6	6	6	6.556055	6.7282	6.38391	TRUE	TRUE	TRUE	-0.429618714	24.68536668	-2.997338965	0.012619329	0.374641965	-2.879160991	0.142893833	1	1	FA_8_3_UV - FA_8_3_noUV	Huh7	limma	0.012619329	0.374641965	FALSE	no hit	6.7282
FASN	A0A0U1RQF0|P49327	Fatty acid synthase OS=Homo sapiens GN=FASN PE=1 SV=1|Fatty acid synthase OS=Homo sapiens GN=FASN PE=1 SV=3	2	1	1	1	1	8	8	8	2	2	2	16	13	16	7.217585	7.68795	6.74722	TRUE	TRUE	TRUE	-0.402497132	26.77571339	-2.946400705	0.01380088	0.374641965	-2.963839336	0.149810636	1	1	FA_8_3_UV - FA_8_3_noUV	Huh7	limma	0.01380088	0.374641965	FALSE	no hit	7.68795
MAP4	E7EVA0|P27816|P27816-2|P27816-6	Microtubule-associated protein OS=Homo sapiens GN=MAP4 PE=1 SV=1|Microtubule-associated protein 4 OS=Homo sapiens GN=MAP4 PE=1 SV=3|Isoform 2 of Microtubule-associated protein 4 OS=Homo sapiens GN=MAP4|Isoform 6 of Microtubule-associated protein 4 OS=Homo sapiens GN=MAP4	1	1	NA	1	NA	8	8	NA	2	2	NA	3	3	NA	6.35738	6.35738	NA	TRUE	FALSE	TRUE	-0.588906804	23.92832056	-2.936414654	0.014045288	0.374641965	-2.980433374	0.15119608	1	1	FA_8_3_UV - FA_8_3_noUV	Huh7	limma	0.014045288	0.374641965	FALSE	no hit	6.35738
RSF1	Q96T23|Q96T23-2	Remodeling and spacing factor 1 OS=Homo sapiens GN=RSF1 PE=1 SV=2|Isoform 2 of Remodeling and spacing factor 1 OS=Homo sapiens GN=RSF1	1	1	NA	1	NA	8	8	NA	2	2	NA	2	2	NA	5.75803	5.75803	NA	TRUE	FALSE	TRUE	0.756673815	20.95213476	2.93285962	0.014133346	0.374641965	-2.986340225	0.151691647	1	1	FA_8_3_UV - FA_8_3_noUV	Huh7	limma	0.014133346	0.374641965	FALSE	no hit	5.75803
PPP6C	O00743|O00743-2|O00743-3	Serine/threonine-protein phosphatase 6 catalytic subunit OS=Homo sapiens GN=PPP6C PE=1 SV=1|Isoform 2 of Serine/threonine-protein phosphatase 6 catalytic subunit OS=Homo sapiens GN=PPP6C|Isoform 3 of Serine/threonine-protein phosphatase 6 catalytic subunit OS=Homo sapiens GN=PPP6C	1	1	NA	1	NA	8	8	NA	2	2	NA	3	3	NA	6.33753	6.33753	NA	TRUE	FALSE	TRUE	-0.362700373	24.19445428	-2.904618123	0.014852935	0.374641965	-3.033251695	0.155672516	1	1	FA_8_3_UV - FA_8_3_noUV	Huh7	limma	0.014852935	0.374641965	FALSE	no hit	6.33753
FNTA	B3KVN2|P49354|P49354-2	Farnesyltransferase, CAAX box, alpha, isoform CRA_c OS=Homo sapiens GN=FNTA PE=1 SV=1|Protein farnesyltransferase/geranylgeranyltransferase type-1 subunit alpha OS=Homo sapiens GN=FNTA PE=1 SV=1|Isoform 2 of Protein farnesyltransferase/geranylgeranyltransferase type-1 subunit alpha OS=Homo sapiens GN=FNTA	1	1	NA	1	NA	8	8	NA	2	2	NA	3	3	NA	5.97134	5.97134	NA	TRUE	FALSE	TRUE	-0.444871907	22.79467559	-2.89110139	0.015210274	0.374641965	-3.055694945	0.157605641	1	1	FA_8_3_UV - FA_8_3_noUV	Huh7	limma	0.015210274	0.374641965	FALSE	no hit	5.97134
NAP1L1	B7Z9C2|H0YIV4|P55209|P55209-3	Nucleosome assembly protein 1-like 1 OS=Homo sapiens GN=NAP1L1 PE=1 SV=1|Nucleosome assembly protein 1-like 1 (Fragment) OS=Homo sapiens GN=NAP1L1 PE=1 SV=1|Nucleosome assembly protein 1-like 1 OS=Homo sapiens GN=NAP1L1 PE=1 SV=1|Isoform 3 of Nucleosome assembly protein 1-like 1 OS=Homo sapiens GN=NAP1L1	1	1	NA	1	NA	8	8	NA	2	2	NA	4	4	NA	6.69838	6.69838	NA	TRUE	FALSE	TRUE	-0.47412014	24.66850657	-2.878253278	0.015557948	0.374641965	-3.077021812	0.159459951	1	1	FA_8_3_UV - FA_8_3_noUV	Huh7	limma	0.015557948	0.374641965	FALSE	no hit	6.69838
COPZ1	F8VUC5|F8VVA7|F8VXB1|F8VXR1|F8VYZ4|F8W156|P61923|P61923-4|P61923-5	Coatomer subunit zeta-1 (Fragment) OS=Homo sapiens GN=COPZ1 PE=1 SV=1|Coatomer subunit zeta-1 OS=Homo sapiens GN=COPZ1 PE=1 SV=1|Isoform 4 of Coatomer subunit zeta-1 OS=Homo sapiens GN=COPZ1|Isoform 5 of Coatomer subunit zeta-1 OS=Homo sapiens GN=COPZ1	2	1	1	1	1	8	8	8	2	2	2	2	2	2	6.08529	6.56725	5.60333	TRUE	TRUE	TRUE	-0.44032219	23.78401415	-2.86671752	0.015876909	0.374641965	-3.096164718	0.161138873	1	1	FA_8_3_UV - FA_8_3_noUV	Huh7	limma	0.015876909	0.374641965	FALSE	no hit	6.56725
ABCF1	H0YGW7|Q8NE71|Q8NE71-2	ATP-binding cassette sub-family F member 1 (Fragment) OS=Homo sapiens GN=ABCF1 PE=1 SV=1|ATP-binding cassette sub-family F member 1 OS=Homo sapiens GN=ABCF1 PE=1 SV=2|Isoform 2 of ATP-binding cassette sub-family F member 1 OS=Homo sapiens GN=ABCF1	1	1	NA	1	NA	8	8	NA	2	2	NA	2	2	NA	6.49491	6.49491	NA	TRUE	FALSE	TRUE	-0.41448882	23.17579821	-2.823674052	0.017126081	0.374641965	-3.167540221	0.16752142	1	1	FA_8_3_UV - FA_8_3_noUV	Huh7	limma	0.017126081	0.374641965	FALSE	no hit	6.49491
VPS29	F8VXU5|Q9UBQ0|Q9UBQ0-2	Vacuolar protein sorting-associated protein 29 OS=Homo sapiens GN=VPS29 PE=1 SV=1|Vacuolar protein sorting-associated protein 29 OS=Homo sapiens GN=VPS29 PE=1 SV=1|Isoform 2 of Vacuolar protein sorting-associated protein 29 OS=Homo sapiens GN=VPS29	2	1	1	1	1	8	8	8	2	2	2	5	4	5	7.090035	7.21792	6.96215	TRUE	TRUE	TRUE	-0.288903698	24.9049838	-2.823555618	0.017129651	0.374641965	-3.167736486	0.167539239	1	1	FA_8_3_UV - FA_8_3_noUV	Huh7	limma	0.017129651	0.374641965	FALSE	no hit	7.21792
NPLOC4	Q8TAT6|Q8TAT6-2	Nuclear protein localization protein 4 homolog OS=Homo sapiens GN=NPLOC4 PE=1 SV=3|Isoform 2 of Nuclear protein localization protein 4 homolog OS=Homo sapiens GN=NPLOC4	1	1	NA	1	NA	8	8	NA	2	2	NA	9	9	NA	7.29334	7.29334	NA	TRUE	FALSE	TRUE	-0.263805937	25.60024248	-2.792647264	0.018087173	0.374641965	-3.218930193	0.172238599	1	1	FA_8_3_UV - FA_8_3_noUV	Huh7	limma	0.018087173	0.374641965	FALSE	no hit	7.29334
HK1	P19367|P19367-2|P19367-3|P19367-4	Hexokinase-1 OS=Homo sapiens GN=HK1 PE=1 SV=3|Isoform 2 of Hexokinase-1 OS=Homo sapiens GN=HK1|Isoform 3 of Hexokinase-1 OS=Homo sapiens GN=HK1|Isoform 4 of Hexokinase-1 OS=Homo sapiens GN=HK1	1	1	NA	1	NA	8	8	NA	2	2	NA	3	3	NA	6.6178	6.6178	NA	TRUE	FALSE	TRUE	0.285241316	24.34886848	2.782439582	0.018415022	0.374641965	-3.235824989	0.173812057	1	1	FA_8_3_UV - FA_8_3_noUV	Huh7	limma	0.018415022	0.374641965	FALSE	no hit	6.6178
NASP	P49321	Nuclear autoantigenic sperm protein OS=Homo sapiens GN=NASP PE=1 SV=2	2	1	1	1	1	8	8	8	2	2	2	13	4	13	7.39605	7.37394	7.41816	TRUE	TRUE	TRUE	-0.552177104	25.21718509	-2.768889226	0.018859425	0.374641965	-3.258242137	0.175917325	1	1	FA_8_3_UV - FA_8_3_noUV	Huh7	limma	0.018859425	0.374641965	FALSE	no hit	7.37394
TMEM189-UBE2V1|UBE2V1	I3L0A0|Q13404|Q13404-1|Q13404-2|Q13404-7|Q13404-8	HCG2044781 OS=Homo sapiens GN=TMEM189-UBE2V1 PE=4 SV=1|Isoform 1 of Ubiquitin-conjugating enzyme E2 variant 1 OS=Homo sapiens GN=UBE2V1|Isoform 2 of Ubiquitin-conjugating enzyme E2 variant 1 OS=Homo sapiens GN=UBE2V1|Isoform 5 of Ubiquitin-conjugating enzyme E2 variant 1 OS=Homo sapiens GN=UBE2V1|Isoform 6 of Ubiquitin-conjugating enzyme E2 variant 1 OS=Homo sapiens GN=UBE2V1|Ubiquitin-conjugatin…	2	1	1	1	1	8	8	8	2	2	2	5	3	5	6.60417	6.75751	6.45083	TRUE	TRUE	TRUE	-0.622420623	23.96119749	-2.738670222	0.019889455	0.374641965	-3.308190609	0.180680732	1	1	FA_8_3_UV - FA_8_3_noUV	Huh7	limma	0.019889455	0.374641965	FALSE	no hit	6.75751
PMPCA	Q10713	Mitochondrial-processing peptidase subunit alpha OS=Homo sapiens GN=PMPCA PE=1 SV=2	2	1	1	1	1	8	8	8	2	2	2	7	3	7	6.459865	6.60641	6.31332	TRUE	TRUE	TRUE	0.282883474	23.33791098	2.717877087	0.0206306	0.374641965	-3.342520538	0.18401354	1	1	FA_8_3_UV - FA_8_3_noUV	Huh7	limma	0.0206306	0.374641965	FALSE	no hit	6.60641
ATIC	P31939|P31939-2	Bifunctional purine biosynthesis protein PURH OS=Homo sapiens GN=ATIC PE=1 SV=3|Isoform 2 of Bifunctional purine biosynthesis protein PURH OS=Homo sapiens GN=ATIC	2	1	1	1	1	8	8	8	2	2	2	4	4	2	6.29007	6.619	5.96114	TRUE	TRUE	TRUE	-0.459836298	24.15756255	-2.71386294	0.020776817	0.374641965	-3.349144115	0.184662152	1	1	FA_8_3_UV - FA_8_3_noUV	Huh7	limma	0.020776817	0.374641965	FALSE	no hit	6.619
CRTAP	C9JP16|O75718	Cartilage-associated protein OS=Homo sapiens GN=CRTAP PE=1 SV=1|Cartilage-associated protein OS=Homo sapiens GN=CRTAP PE=1 SV=1	2	1	1	1	1	8	8	8	2	2	2	6	6	5	6.856135	7.06408	6.64819	TRUE	TRUE	TRUE	0.30216639	25.22567992	2.712685586	0.020819898	0.374641965	-3.351086574	0.184852712	1	1	FA_8_3_UV - FA_8_3_noUV	Huh7	limma	0.020819898	0.374641965	FALSE	no hit	7.06408
PSMC5	P62195|P62195-2	26S protease regulatory subunit 8 OS=Homo sapiens GN=PSMC5 PE=1 SV=1|Isoform 2 of 26S protease regulatory subunit 8 OS=Homo sapiens GN=PSMC5	1	1	NA	1	NA	8	8	NA	2	2	NA	2	2	NA	5.51308	5.51308	NA	TRUE	FALSE	TRUE	-0.263335953	22.27046332	-2.712168692	0.02083884	0.374641965	-3.351939337	0.184936419	1	1	FA_8_3_UV - FA_8_3_noUV	Huh7	limma	0.02083884	0.374641965	FALSE	no hit	5.51308
SCP2	P22307|P22307-4|P22307-7|P22307-8	Isoform 4 of Non-specific lipid-transfer protein OS=Homo sapiens GN=SCP2|Isoform 7 of Non-specific lipid-transfer protein OS=Homo sapiens GN=SCP2|Isoform 8 of Non-specific lipid-transfer protein OS=Homo sapiens GN=SCP2|Non-specific lipid-transfer protein OS=Homo sapiens GN=SCP2 PE=1 SV=2	2	1	1	1	1	8	8	8	2	2	2	11	5	11	6.73184	6.60426	6.85942	TRUE	TRUE	TRUE	0.331881704	24.60372574	2.70689037	0.021033252	0.374641965	-3.360646181	0.185792812	1	1	FA_8_3_UV - FA_8_3_noUV	Huh7	limma	0.021033252	0.374641965	FALSE	no hit	6.60426
DNMT1	P26358|P26358-2|P26358-3	DNA (cytosine-5)-methyltransferase 1 OS=Homo sapiens GN=DNMT1 PE=1 SV=2|Isoform 2 of DNA (cytosine-5)-methyltransferase 1 OS=Homo sapiens GN=DNMT1|Isoform 3 of DNA (cytosine-5)-methyltransferase 1 OS=Homo sapiens GN=DNMT1	1	1	NA	1	NA	8	8	NA	2	2	NA	5	5	NA	6.45389	6.45389	NA	TRUE	FALSE	TRUE	-0.257041506	24.1483543	-2.705936724	0.021068569	0.374641965	-3.362219024	0.18594785	1	1	FA_8_3_UV - FA_8_3_noUV	Huh7	limma	0.021068569	0.374641965	FALSE	no hit	6.45389
TUFM	P49411	Elongation factor Tu, mitochondrial OS=Homo sapiens GN=TUFM PE=1 SV=2	2	1	1	1	1	8	8	8	2	2	2	11	11	5	6.88597	7.43194	6.34	TRUE	TRUE	TRUE	0.254546649	26.16212037	2.705845404	0.021071954	0.374641965	-3.362369634	0.185962702	1	1	FA_8_3_UV - FA_8_3_noUV	Huh7	limma	0.021071954	0.374641965	FALSE	no hit	7.43194
RPSA	A0A0C4DG17|C9J9K3|P08865	40S ribosomal protein SA OS=Homo sapiens GN=RPSA PE=1 SV=1|40S ribosomal protein SA (Fragment) OS=Homo sapiens GN=RPSA PE=1 SV=7|40S ribosomal protein SA OS=Homo sapiens GN=RPSA PE=1 SV=4	2	1	1	1	1	8	8	8	2	2	2	12	10	12	7.86786	8.14275	7.59297	TRUE	TRUE	TRUE	-0.357683695	25.98205335	-2.705828636	0.021072576	0.374641965	-3.362397287	0.185965429	1	1	FA_8_3_UV - FA_8_3_noUV	Huh7	limma	0.021072576	0.374641965	FALSE	no hit	8.14275
TLN2	Q9Y4G6	Talin-2 OS=Homo sapiens GN=TLN2 PE=1 SV=4	1	1	NA	1	NA	8	8	NA	2	2	NA	3	3	NA	5.95191	5.95191	NA	TRUE	FALSE	TRUE	-0.305779427	23.36765336	-2.677412939	0.022152619	0.374641965	-3.409227482	0.190629404	1	1	FA_8_3_UV - FA_8_3_noUV	Huh7	limma	0.022152619	0.374641965	FALSE	no hit	5.95191
DDX17	H3BLZ8|Q92841|Q92841-1|Q92841-2|Q92841-3	Isoform 2 of Probable ATP-dependent RNA helicase DDX17 OS=Homo sapiens GN=DDX17|Isoform 3 of Probable ATP-dependent RNA helicase DDX17 OS=Homo sapiens GN=DDX17|Isoform 4 of Probable ATP-dependent RNA helicase DDX17 OS=Homo sapiens GN=DDX17|Probable ATP-dependent RNA helicase DDX17 OS=Homo sapiens GN=DDX17 PE=1 SV=1|Probable ATP-dependent RNA helicase DDX17 OS=Homo sapiens GN=DDX17 PE=1 SV=2	2	1	1	1	1	8	8	8	2	2	2	8	8	2	6.44703	6.76713	6.12693	TRUE	TRUE	TRUE	0.252000653	25.58538315	2.675043311	0.022245133	0.374641965	-3.413129528	0.191022196	1	1	FA_8_3_UV - FA_8_3_noUV	Huh7	limma	0.022245133	0.374641965	FALSE	no hit	6.76713
NUP58	H7BYF2|Q5JRG1|Q9BVL2|Q9BVL2-2|Q9BVL2-3	Nucleoporin p58/p45 (Fragment) OS=Homo sapiens GN=NUP58 PE=1 SV=1|Nucleoporin p58/p45 (Fragment) OS=Homo sapiens GN=NUP58 PE=1 SV=1|Nucleoporin p58/p45 OS=Homo sapiens GN=NUP58 PE=1 SV=1|Isoform 2 of Nucleoporin p58/p45 OS=Homo sapiens GN=NUP58|Isoform 3 of Nucleoporin p58/p45 OS=Homo sapiens GN=NUP58	1	1	NA	1	NA	8	8	NA	2	2	NA	2	2	NA	6.83169	6.83169	NA	TRUE	FALSE	TRUE	0.473841836	22.73890669	2.672638697	0.022339405	0.374641965	-3.417088663	0.191421395	1	1	FA_8_3_UV - FA_8_3_noUV	Huh7	limma	0.022339405	0.374641965	FALSE	no hit	6.83169
SET	A0A0C4DFV9|Q01105|Q01105-2|Q01105-3|Q01105-4	Protein SET OS=Homo sapiens GN=SET PE=1 SV=1|Protein SET OS=Homo sapiens GN=SET PE=1 SV=3|Isoform 2 of Protein SET OS=Homo sapiens GN=SET|Isoform 3 of Protein SET OS=Homo sapiens GN=SET|Isoform 4 of Protein SET OS=Homo sapiens GN=SET	2	1	1	1	1	8	8	8	2	2	2	7	4	7	6.99703	6.72149	7.27257	TRUE	TRUE	TRUE	-0.56281675	25.24337454	-2.672047086	0.02236266	0.374641965	-3.418062656	0.191519705	1	1	FA_8_3_UV - FA_8_3_noUV	Huh7	limma	0.02236266	0.374641965	FALSE	no hit	6.72149
PRC1	O43663|O43663-2|O43663-3|O43663-4	Protein regulator of cytokinesis 1 OS=Homo sapiens GN=PRC1 PE=1 SV=2|Isoform 2 of Protein regulator of cytokinesis 1 OS=Homo sapiens GN=PRC1|Isoform 3 of Protein regulator of cytokinesis 1 OS=Homo sapiens GN=PRC1|Isoform 4 of Protein regulator of cytokinesis 1 OS=Homo sapiens GN=PRC1	1	1	NA	1	NA	8	8	NA	2	2	NA	2	2	NA	6.68848	6.68848	NA	TRUE	FALSE	TRUE	0.535446535	22.91933649	2.668887749	0.022487253	0.374641965	-3.423263451	0.19204533	1	1	FA_8_3_UV - FA_8_3_noUV	Huh7	limma	0.022487253	0.374641965	FALSE	no hit	6.68848
EXOSC5	Q9NQT4	Exosome complex component RRP46 OS=Homo sapiens GN=EXOSC5 PE=1 SV=1	1	1	NA	1	NA	8	8	NA	2	2	NA	2	2	NA	6.0362	6.0362	NA	TRUE	FALSE	TRUE	0.479471871	23.20923614	2.609564612	0.024958847	0.374641965	-3.520738658	0.202112807	1	1	FA_8_3_UV - FA_8_3_noUV	Huh7	limma	0.024958847	0.374641965	FALSE	no hit	6.0362
SHMT2	P34897|P34897-2|P34897-3	Isoform 2 of Serine hydroxymethyltransferase, mitochondrial OS=Homo sapiens GN=SHMT2|Isoform 3 of Serine hydroxymethyltransferase, mitochondrial OS=Homo sapiens GN=SHMT2|Serine hydroxymethyltransferase, mitochondrial OS=Homo sapiens GN=SHMT2 PE=1 SV=3	2	1	1	1	1	8	8	8	2	2	2	10	10	7	7.067855	7.36921	6.7665	TRUE	TRUE	TRUE	0.344640052	25.93654172	2.596819376	0.025523984	0.374641965	-3.54163269	0.204325064	1	1	FA_8_3_UV - FA_8_3_noUV	Huh7	limma	0.025523984	0.374641965	FALSE	no hit	7.36921
DLST	P36957|P36957-2	Dihydrolipoyllysine-residue succinyltransferase component of 2-oxoglutarate dehydrogenase complex, mitochondrial OS=Homo sapiens GN=DLST PE=1 SV=4|Isoform 2 of Dihydrolipoyllysine-residue succinyltransferase component of 2-oxoglutarate dehydrogenase complex, mitochondrial OS=Homo sapiens GN=DLST	2	1	1	1	1	8	8	8	2	2	2	5	5	2	6.667985	7.21993	6.11604	TRUE	TRUE	TRUE	0.258589743	25.16109547	2.585027738	0.026058096	0.374641965	-3.560947179	0.20638744	1	1	FA_8_3_UV - FA_8_3_noUV	Huh7	limma	0.026058096	0.374641965	FALSE	no hit	7.21993
SDHA	A0A087X1I3|D6RFM5|P31040|P31040-2|P31040-3	Isoform 2 of Succinate dehydrogenase [ubiquinone] flavoprotein subunit, mitochondrial OS=Homo sapiens GN=SDHA|Isoform 3 of Succinate dehydrogenase [ubiquinone] flavoprotein subunit, mitochondrial OS=Homo sapiens GN=SDHA|Succinate dehydrogenase [ubiquinone] flavoprotein subunit, mitochondrial OS=Homo sapiens GN=SDHA PE=1 SV=1|Succinate dehydrogenase [ubiquinone] flavoprotein subunit, mitochondrial…	2	1	1	1	1	8	8	8	2	2	2	7	7	4	7.01585	7.33163	6.70007	TRUE	TRUE	TRUE	0.369012258	25.70603142	2.583301482	0.026137209	0.374641965	-3.563773416	0.206690629	1	1	FA_8_3_UV - FA_8_3_noUV	Huh7	limma	0.026137209	0.374641965	FALSE	no hit	7.33163
CTTN	Q14247	Src substrate cortactin OS=Homo sapiens GN=CTTN PE=1 SV=2	1	1	NA	1	NA	8	8	NA	2	2	NA	4	4	NA	7.05519	7.05519	NA	TRUE	FALSE	TRUE	-0.304005411	23.9097751	-2.566354559	0.026926577	0.374641965	-3.591500369	0.209684263	1	1	FA_8_3_UV - FA_8_3_noUV	Huh7	limma	0.026926577	0.374641965	FALSE	no hit	7.05519
PGK1	P00558|P00558-2	Isoform 2 of Phosphoglycerate kinase 1 OS=Homo sapiens GN=PGK1|Phosphoglycerate kinase 1 OS=Homo sapiens GN=PGK1 PE=1 SV=3	2	1	1	1	1	8	8	8	2	2	2	15	9	15	7.287275	7.15621	7.41834	TRUE	TRUE	TRUE	-0.440398966	25.26150137	-2.563583266	0.02705788	0.374641965	-3.59603122	0.210176777	1	1	FA_8_3_UV - FA_8_3_noUV	Huh7	limma	0.02705788	0.374641965	FALSE	no hit	7.15621
ALDH1B1	P30837	Aldehyde dehydrogenase X, mitochondrial OS=Homo sapiens GN=ALDH1B1 PE=1 SV=3	1	1	NA	1	NA	8	8	NA	2	2	NA	4	4	NA	6.25729	6.25729	NA	TRUE	FALSE	TRUE	0.414177137	24.2113859	2.55511687	0.027462938	0.374641965	-3.609867292	0.21168661	1	1	FA_8_3_UV - FA_8_3_noUV	Huh7	limma	0.027462938	0.374641965	FALSE	no hit	6.25729
YWHAQ	P27348	14-3-3 protein theta OS=Homo sapiens GN=YWHAQ PE=1 SV=1	2	1	1	1	1	8	8	8	2	2	2	5	5	2	7.060755	7.82842	6.29309	TRUE	TRUE	TRUE	-0.521487485	25.47366136	-2.553999297	0.027516851	0.374641965	-3.611693005	0.211886493	1	1	FA_8_3_UV - FA_8_3_noUV	Huh7	limma	0.027516851	0.374641965	FALSE	no hit	7.82842
ANP32A	H0YN26|P39687	Acidic leucine-rich nuclear phosphoprotein 32 family member A OS=Homo sapiens GN=ANP32A PE=1 SV=1	2	1	1	1	1	8	8	8	2	2	2	7	6	7	7.441935	7.45994	7.42393	TRUE	TRUE	TRUE	-0.579460873	25.17743497	-2.551934176	0.027616749	0.374641965	-3.615066259	0.21225621	1	1	FA_8_3_UV - FA_8_3_noUV	Huh7	limma	0.027616749	0.374641965	FALSE	no hit	7.45994
IDH3A	H0YL72|P50213|P50213-2	Isocitrate dehydrogenase [NAD] subunit alpha, mitochondrial OS=Homo sapiens GN=IDH3A PE=1 SV=1|Isoform 2 of Isocitrate dehydrogenase [NAD] subunit alpha, mitochondrial OS=Homo sapiens GN=IDH3A	2	1	1	1	1	8	8	8	2	2	2	7	7	2	6.598985	7.39549	5.80248	TRUE	TRUE	TRUE	0.272664643	25.32035027	2.511247199	0.029659395	0.374641965	-3.681413508	0.219635613	1	1	FA_8_3_UV - FA_8_3_noUV	Huh7	limma	0.029659395	0.374641965	FALSE	no hit	7.39549
ATP6V1B2	P21281	V-type proton ATPase subunit B, brain isoform OS=Homo sapiens GN=ATP6V1B2 PE=1 SV=3	1	1	NA	1	NA	8	8	NA	2	2	NA	5	5	NA	6.73434	6.73434	NA	TRUE	FALSE	TRUE	0.239739253	24.51301289	2.507937926	0.029831923	0.374641965	-3.686800102	0.220243816	1	1	FA_8_3_UV - FA_8_3_noUV	Huh7	limma	0.029831923	0.374641965	FALSE	no hit	6.73434
PPIA	P62937	Peptidyl-prolyl cis-trans isomerase A OS=Homo sapiens GN=PPIA PE=1 SV=2	2	1	1	1	1	8	8	8	2	2	2	9	8	9	7.970655	8.04316	7.89815	TRUE	TRUE	TRUE	-0.453584476	26.0444885	-2.499278323	0.030288069	0.374641965	-3.700888349	0.221841056	1	1	FA_8_3_UV - FA_8_3_noUV	Huh7	limma	0.030288069	0.374641965	FALSE	no hit	8.04316
TPI1	P60174|P60174-1	Triosephosphate isomerase OS=Homo sapiens GN=TPI1 PE=1 SV=3|Isoform 2 of Triosephosphate isomerase OS=Homo sapiens GN=TPI1	2	1	1	1	1	8	8	8	2	2	2	12	6	12	7.381205	7.35663	7.40578	TRUE	TRUE	TRUE	-0.457533974	24.6695963	-2.497447942	0.030385358	0.374641965	-3.703864832	0.222179724	1	1	FA_8_3_UV - FA_8_3_noUV	Huh7	limma	0.030385358	0.374641965	FALSE	no hit	7.35663
ANP32E	E9PPH5|Q9BTT0|Q9BTT0-3	Acidic leucine-rich nuclear phosphoprotein 32 family member E (Fragment) OS=Homo sapiens GN=ANP32E PE=1 SV=1|Acidic leucine-rich nuclear phosphoprotein 32 family member E OS=Homo sapiens GN=ANP32E PE=1 SV=1|Isoform 3 of Acidic leucine-rich nuclear phosphoprotein 32 family member E OS=Homo sapiens GN=ANP32E	2	1	1	1	1	8	8	8	2	2	2	2	2	2	6.17337	6.33144	6.0153	TRUE	TRUE	TRUE	-0.629955665	23.54362236	-2.496285271	0.030447316	0.374641965	-3.705755266	0.222395041	1	1	FA_8_3_UV - FA_8_3_noUV	Huh7	limma	0.030447316	0.374641965	FALSE	no hit	6.33144
DECR1	Q16698|Q16698-2	2,4-dienoyl-CoA reductase, mitochondrial OS=Homo sapiens GN=DECR1 PE=1 SV=1|Isoform 2 of 2,4-dienoyl-CoA reductase, mitochondrial OS=Homo sapiens GN=DECR1	2	1	1	1	1	8	8	8	2	2	2	8	3	8	6.429445	6.06116	6.79773	TRUE	TRUE	TRUE	0.358835155	23.78260032	2.496057623	0.030459461	0.374641965	-3.706125387	0.222437217	1	1	FA_8_3_UV - FA_8_3_noUV	Huh7	limma	0.030459461	0.374641965	FALSE	no hit	6.06116
STIP1	P31948|P31948-2	Stress-induced-phosphoprotein 1 OS=Homo sapiens GN=STIP1 PE=1 SV=1|Isoform 2 of Stress-induced-phosphoprotein 1 OS=Homo sapiens GN=STIP1	2	1	1	1	1	8	8	8	2	2	2	14	14	9	7.084645	7.19938	6.96991	TRUE	TRUE	TRUE	-0.415087186	26.046421	-2.492809846	0.030633259	0.374641965	-3.711404957	0.223039551	1	1	FA_8_3_UV - FA_8_3_noUV	Huh7	limma	0.030633259	0.374641965	FALSE	no hit	7.19938
CDK6	Q00534	Cyclin-dependent kinase 6 OS=Homo sapiens GN=CDK6 PE=1 SV=1	2	1	1	1	1	8	8	8	2	2	2	2	2	2	6.524165	6.41878	6.62955	TRUE	TRUE	TRUE	-0.321031464	23.9131907	-2.492363601	0.030657215	0.374641965	-3.712130253	0.223122403	1	1	FA_8_3_UV - FA_8_3_noUV	Huh7	limma	0.030657215	0.374641965	FALSE	no hit	6.41878
ATP5A1	P25705	ATP synthase subunit alpha, mitochondrial OS=Homo sapiens GN=ATP5A1 PE=1 SV=1	2	1	1	1	1	8	8	8	2	2	2	10	10	9	7.218355	7.48279	6.95392	TRUE	TRUE	TRUE	0.275987501	25.94876416	2.491240923	0.030717565	0.374641965	-3.713954849	0.223330942	1	1	FA_8_3_UV - FA_8_3_noUV	Huh7	limma	0.030717565	0.374641965	FALSE	no hit	7.48279
PLD3	Q8IV08	Phospholipase D3 OS=Homo sapiens GN=PLD3 PE=1 SV=1	2	1	1	1	1	8	8	8	2	2	2	4	3	4	6.47596	6.45652	6.4954	TRUE	TRUE	TRUE	0.265282894	23.57070852	2.476382401	0.031527355	0.374641965	-3.738085925	0.226104074	1	1	FA_8_3_UV - FA_8_3_noUV	Huh7	limma	0.031527355	0.374641965	FALSE	no hit	6.45652
RAB5C	P51148|P51148-2	Ras-related protein Rab-5C OS=Homo sapiens GN=RAB5C PE=1 SV=2|Isoform 2 of Ras-related protein Rab-5C OS=Homo sapiens GN=RAB5C	2	1	1	1	1	8	8	8	2	2	2	3	3	2	6.21698	6.42738	6.00658	TRUE	TRUE	TRUE	0.297773814	23.63706298	2.469279589	0.031921817	0.374641965	-3.749609764	0.22743836	1	1	FA_8_3_UV - FA_8_3_noUV	Huh7	limma	0.031921817	0.374641965	FALSE	no hit	6.42738
OGDHL	Q9ULD0	2-oxoglutarate dehydrogenase-like, mitochondrial OS=Homo sapiens GN=OGDHL PE=1 SV=3	1	1	NA	1	NA	8	8	NA	2	2	NA	2	2	NA	6.32281	6.32281	NA	TRUE	FALSE	TRUE	0.288762253	24.3247292	2.467391269	0.032027499	0.374641965	-3.752672163	0.227794029	1	1	FA_8_3_UV - FA_8_3_noUV	Huh7	limma	0.032027499	0.374641965	FALSE	no hit	6.32281
ANP32B	Q92688|Q92688-2	Acidic leucine-rich nuclear phosphoprotein 32 family member B OS=Homo sapiens GN=ANP32B PE=1 SV=1|Isoform 2 of Acidic leucine-rich nuclear phosphoprotein 32 family member B OS=Homo sapiens GN=ANP32B	2	1	1	1	1	8	8	8	2	2	2	6	4	6	6.94364	6.92051	6.96677	TRUE	TRUE	TRUE	-0.541225902	24.63200684	-2.465392722	0.032139722	0.374641965	-3.755912735	0.228170892	1	1	FA_8_3_UV - FA_8_3_noUV	Huh7	limma	0.032139722	0.374641965	FALSE	no hit	6.92051
LMAN1	P49257	Protein ERGIC-53 OS=Homo sapiens GN=LMAN1 PE=1 SV=2	2	1	1	1	1	8	8	8	2	2	2	6	4	6	6.525705	6.75728	6.29413	TRUE	TRUE	TRUE	0.413219764	24.50102633	2.46216332	0.032321876	0.374641965	-3.761147808	0.228780792	1	1	FA_8_3_UV - FA_8_3_noUV	Huh7	limma	0.032321876	0.374641965	FALSE	no hit	6.75728
PCBP2	F8VZX2|H3BRU6|Q15366|Q15366-2|Q15366-3|Q15366-4|Q15366-5|Q15366-6|Q15366-7|Q15366-8	Poly(rC)-binding protein 2 OS=Homo sapiens GN=PCBP2 PE=1 SV=1|Poly(rC)-binding protein 2 (Fragment) OS=Homo sapiens GN=PCBP2 PE=1 SV=1|Poly(rC)-binding protein 2 OS=Homo sapiens GN=PCBP2 PE=1 SV=1|Isoform 2 of Poly(rC)-binding protein 2 OS=Homo sapiens GN=PCBP2|Isoform 3 of Poly(rC)-binding protein 2 OS=Homo sapiens GN=PCBP2|Isoform 4 of Poly(rC)-binding protein 2 OS=Homo sapiens GN=PCBP2|Isoform…	2	1	1	1	1	8	8	8	2	2	2	3	2	3	6.574655	6.8413	6.30801	TRUE	TRUE	TRUE	-0.286131484	23.4093285	-2.46077694	0.032400384	0.374641965	-3.763394733	0.229042978	1	1	FA_8_3_UV - FA_8_3_noUV	Huh7	limma	0.032400384	0.374641965	FALSE	no hit	6.8413
GDI2	P50395	Rab GDP dissociation inhibitor beta OS=Homo sapiens GN=GDI2 PE=1 SV=2	2	1	1	1	1	8	8	8	2	2	2	11	7	11	6.687945	6.87824	6.49765	TRUE	TRUE	TRUE	-0.463022109	25.0290515	-2.455318869	0.032711284	0.374641965	-3.772237825	0.230077261	1	1	FA_8_3_UV - FA_8_3_noUV	Huh7	limma	0.032711284	0.374641965	FALSE	no hit	6.87824
NPEPPS	E9PLK3|P55786	Puromycin-sensitive aminopeptidase OS=Homo sapiens GN=NPEPPS PE=1 SV=1|Puromycin-sensitive aminopeptidase OS=Homo sapiens GN=NPEPPS PE=1 SV=2	2	1	1	1	1	8	8	8	2	2	2	24	24	20	7.292045	7.76372	6.82037	TRUE	TRUE	TRUE	-0.335086209	27.51960478	-2.451643395	0.032922287	0.374641965	-3.778190176	0.230775618	1	1	FA_8_3_UV - FA_8_3_noUV	Huh7	limma	0.032922287	0.374641965	FALSE	no hit	7.76372
NUDT5	A6NFX8|Q9UKK9	ADP-sugar pyrophosphatase OS=Homo sapiens GN=NUDT5 PE=1 SV=1|ADP-sugar pyrophosphatase OS=Homo sapiens GN=NUDT5 PE=1 SV=1	2	1	1	1	1	8	8	8	2	2	2	9	4	9	6.93452	6.79712	7.07192	TRUE	TRUE	TRUE	-0.557697269	24.50728167	-2.439056664	0.033655011	0.374641965	-3.798558011	0.233178563	1	1	FA_8_3_UV - FA_8_3_noUV	Huh7	limma	0.033655011	0.374641965	FALSE	no hit	6.79712
KTN1	Q86UP2	Kinectin OS=Homo sapiens GN=KTN1 PE=1 SV=1	2	1	1	1	1	8	8	8	2	2	2	32	23	32	7.320625	7.50858	7.13267	TRUE	TRUE	TRUE	0.414844958	27.37087049	2.438921432	0.033662969	0.374641965	-3.798776707	0.233204476	1	1	FA_8_3_UV - FA_8_3_noUV	Huh7	limma	0.033662969	0.374641965	FALSE	no hit	7.50858
UQCRC1	P31930	Cytochrome b-c1 complex subunit 1, mitochondrial OS=Homo sapiens GN=UQCRC1 PE=1 SV=3	2	1	1	1	1	8	8	8	2	2	2	9	9	2	7.079725	7.89993	6.25952	TRUE	TRUE	TRUE	0.27683947	25.60646087	2.436287472	0.033818344	0.374641965	-3.803035727	0.233709605	1	1	FA_8_3_UV - FA_8_3_noUV	Huh7	limma	0.033818344	0.374641965	FALSE	no hit	7.89993
GOT2	P00505	Aspartate aminotransferase, mitochondrial OS=Homo sapiens GN=GOT2 PE=1 SV=3	2	1	1	1	1	8	8	8	2	2	2	12	12	9	7.10957	7.40448	6.81466	TRUE	TRUE	TRUE	0.268182648	26.238535	2.433628055	0.033975931	0.374641965	-3.807334774	0.234220402	1	1	FA_8_3_UV - FA_8_3_noUV	Huh7	limma	0.033975931	0.374641965	FALSE	no hit	7.40448
UBE3A	A0A0D9SG77|Q05086|Q05086-2|Q05086-3	Ubiquitin-protein ligase E3A OS=Homo sapiens GN=UBE3A PE=1 SV=1|Ubiquitin-protein ligase E3A OS=Homo sapiens GN=UBE3A PE=1 SV=4|Isoform I of Ubiquitin-protein ligase E3A OS=Homo sapiens GN=UBE3A|Isoform III of Ubiquitin-protein ligase E3A OS=Homo sapiens GN=UBE3A	1	1	NA	1	NA	8	8	NA	2	2	NA	3	3	NA	6.26971	6.26971	NA	TRUE	FALSE	TRUE	-0.366576738	23.99003748	-2.423407929	0.034588243	0.374641965	-3.823845266	0.236190751	1	1	FA_8_3_UV - FA_8_3_noUV	Huh7	limma	0.034588243	0.374641965	FALSE	no hit	6.26971
CAD	F8VPD4|P27708	CAD protein OS=Homo sapiens GN=CAD PE=1 SV=1|CAD protein OS=Homo sapiens GN=CAD PE=1 SV=3	1	1	NA	1	NA	8	8	NA	2	2	NA	16	16	NA	7.03955	7.03955	NA	TRUE	FALSE	TRUE	-0.28747107	26.29453456	-2.4192145	0.034842588	0.374641965	-3.830614718	0.237002589	1	1	FA_8_3_UV - FA_8_3_noUV	Huh7	limma	0.034842588	0.374641965	FALSE	no hit	7.03955
GSPT1	H3BR35|P15170|P15170-2|P15170-3	Eukaryotic peptide chain release factor GTP-binding subunit ERF3A (Fragment) OS=Homo sapiens GN=GSPT1 PE=1 SV=1|Eukaryotic peptide chain release factor GTP-binding subunit ERF3A OS=Homo sapiens GN=GSPT1 PE=1 SV=1|Isoform 2 of Eukaryotic peptide chain release factor GTP-binding subunit ERF3A OS=Homo sapiens GN=GSPT1|Isoform 3 of Eukaryotic peptide chain release factor GTP-binding subunit ERF3A OS=…	1	1	NA	1	NA	8	8	NA	2	2	NA	8	8	NA	7.28458	7.28458	NA	TRUE	FALSE	TRUE	-0.357633991	25.52726538	-2.416692864	0.034996411	0.374641965	-3.834683986	0.237491721	1	1	FA_8_3_UV - FA_8_3_noUV	Huh7	limma	0.034996411	0.374641965	FALSE	no hit	7.28458
KDELC2	Q7Z4H8|Q7Z4H8-2|Q7Z4H8-3	KDEL motif-containing protein 2 OS=Homo sapiens GN=KDELC2 PE=1 SV=2|Isoform 2 of KDEL motif-containing protein 2 OS=Homo sapiens GN=KDELC2|Isoform 3 of KDEL motif-containing protein 2 OS=Homo sapiens GN=KDELC2	1	1	NA	1	NA	8	8	NA	2	2	NA	2	2	NA	6.67239	6.67239	NA	TRUE	FALSE	TRUE	0.396073454	23.53406663	2.414112602	0.035154496	0.374641965	-3.838846756	0.237992962	1	1	FA_8_3_UV - FA_8_3_noUV	Huh7	limma	0.035154496	0.374641965	FALSE	no hit	6.67239
HSPA4	P34932	Heat shock 70 kDa protein 4 OS=Homo sapiens GN=HSPA4 PE=1 SV=4	2	1	1	1	1	8	8	8	2	2	2	26	9	26	7.05309	7.11553	6.99065	TRUE	TRUE	TRUE	-0.510956238	25.79447589	-2.413484295	0.035193096	0.374641965	-3.839860243	0.23811513	1	1	FA_8_3_UV - FA_8_3_noUV	Huh7	limma	0.035193096	0.374641965	FALSE	no hit	7.11553
PGM1	P36871	Phosphoglucomutase-1 OS=Homo sapiens GN=PGM1 PE=1 SV=3	1	1	NA	1	NA	8	8	NA	2	2	NA	2	2	NA	6.17604	6.17604	NA	TRUE	FALSE	TRUE	-0.34298367	22.76753288	-2.405473252	0.035688893	0.374641965	-3.852776535	0.239676676	1	1	FA_8_3_UV - FA_8_3_noUV	Huh7	limma	0.035688893	0.374641965	FALSE	no hit	6.17604
PLS3	A0A0A0MSQ0|P13797|P13797-2|P13797-3	Plastin-3 OS=Homo sapiens GN=PLS3 PE=1 SV=1|Plastin-3 OS=Homo sapiens GN=PLS3 PE=1 SV=4|Isoform 2 of Plastin-3 OS=Homo sapiens GN=PLS3|Isoform 3 of Plastin-3 OS=Homo sapiens GN=PLS3	1	1	NA	1	NA	8	8	NA	2	2	NA	10	10	NA	6.98172	6.98172	NA	TRUE	FALSE	TRUE	-0.324965536	25.86558393	-2.401651487	0.035927813	0.374641965	-3.858934545	0.240424169	1	1	FA_8_3_UV - FA_8_3_noUV	Huh7	limma	0.035927813	0.374641965	FALSE	no hit	6.98172
NSUN2	Q08J23	tRNA (cytosine(34)-C(5))-methyltransferase OS=Homo sapiens GN=NSUN2 PE=1 SV=2	1	1	NA	1	NA	8	8	NA	2	2	NA	3	3	NA	6.32994	6.32994	NA	TRUE	FALSE	TRUE	-0.292098391	23.26195757	-2.401276405	0.035951345	0.374641965	-3.85953878	0.240497619	1	1	FA_8_3_UV - FA_8_3_noUV	Huh7	limma	0.035951345	0.374641965	FALSE	no hit	6.32994
TPM1	B7Z596|F5H7S3|H0YK48|H7BYY1|P09493-3|P09493-5|P09493-9|Q6ZN40	Isoform 3 of Tropomyosin alpha-1 chain OS=Homo sapiens GN=TPM1|Isoform 5 of Tropomyosin alpha-1 chain OS=Homo sapiens GN=TPM1|Isoform 9 of Tropomyosin alpha-1 chain OS=Homo sapiens GN=TPM1|Tropomyosin 1 (Alpha), isoform CRA_f OS=Homo sapiens GN=TPM1 PE=1 SV=1|Tropomyosin 1 (Alpha), isoform CRA_m OS=Homo sapiens GN=TPM1 PE=1 SV=1|Tropomyosin alpha-1 chain OS=Homo sapiens GN=TPM1 PE=1 SV=1|Tropomyo…	2	1	1	1	1	8	8	8	2	2	2	11	11	2	7.327505	7.73371	6.9213	TRUE	TRUE	TRUE	-0.544423748	26.44429808	-2.39030246	0.036646527	0.374641965	-3.877206305	0.242653584	1	1	FA_8_3_UV - FA_8_3_noUV	Huh7	limma	0.036646527	0.374641965	FALSE	no hit	7.73371
LARS2	E9PHM2|Q15031	Probable leucine--tRNA ligase, mitochondrial OS=Homo sapiens GN=LARS2 PE=1 SV=1|Probable leucine--tRNA ligase, mitochondrial OS=Homo sapiens GN=LARS2 PE=1 SV=2	1	1	NA	1	NA	8	8	NA	2	2	NA	5	5	NA	6.45249	6.45249	NA	TRUE	FALSE	TRUE	0.241089916	24.79574263	2.390273241	0.036648395	0.374641965	-3.877253318	0.242659342	1	1	FA_8_3_UV - FA_8_3_noUV	Huh7	limma	0.036648395	0.374641965	FALSE	no hit	6.45249
NACA	E9PAV3|E9PAV3-2|F8VNW4|F8VZJ2|F8W0W4|F8W1N5|H0YHX9|Q13765	Nascent polypeptide-associated complex subunit alpha, muscle-specific form OS=Homo sapiens GN=NACA PE=1 SV=1|Isoform 2 of Nascent polypeptide-associated complex subunit alpha, muscle-specific form OS=Homo sapiens GN=NACA|Nascent polypeptide-associated complex subunit alpha (Fragment) OS=Homo sapiens GN=NACA PE=1 SV=1|Nascent polypeptide-associated complex subunit alpha OS=Homo sapiens GN=NACA PE=…	1	1	NA	1	NA	8	8	NA	2	2	NA	2	2	NA	5.89118	5.89118	NA	TRUE	FALSE	TRUE	-0.579752066	23.00272067	-2.387936185	0.036798134	0.374641965	-3.881013128	0.243120243	1	1	FA_8_3_UV - FA_8_3_noUV	Huh7	limma	0.036798134	0.374641965	FALSE	no hit	5.89118
LANCL2	Q9NS86	LanC-like protein 2 OS=Homo sapiens GN=LANCL2 PE=1 SV=1	1	1	NA	1	NA	8	8	NA	2	2	NA	3	3	NA	6.35935	6.35935	NA	TRUE	FALSE	TRUE	-0.315236054	23.56784205	-2.386536098	0.036888125	0.374641965	-3.883265096	0.243396654	1	1	FA_8_3_UV - FA_8_3_noUV	Huh7	limma	0.036888125	0.374641965	FALSE	no hit	6.35935
RPA1	P27694	Replication protein A 70 kDa DNA-binding subunit OS=Homo sapiens GN=RPA1 PE=1 SV=2	1	1	NA	1	NA	8	8	NA	2	2	NA	3	3	NA	5.88154	5.88154	NA	TRUE	FALSE	TRUE	-0.36063324	23.15445138	-2.383420155	0.037089172	0.374641965	-3.888275681	0.24401261	1	1	FA_8_3_UV - FA_8_3_noUV	Huh7	limma	0.037089172	0.374641965	FALSE	no hit	5.88154
HSD17B4	E7ER27|P51659	Peroxisomal multifunctional enzyme type 2 OS=Homo sapiens GN=HSD17B4 PE=1 SV=3	2	1	1	1	1	8	8	8	2	2	2	7	4	7	6.28495	6.0947	6.4752	TRUE	TRUE	TRUE	0.381854197	23.5279618	2.375069672	0.037633237	0.374641965	-3.901695078	0.24566872	1	1	FA_8_3_UV - FA_8_3_noUV	Huh7	limma	0.037633237	0.374641965	FALSE	no hit	6.0947
ACAD9	Q9H845	Acyl-CoA dehydrogenase family member 9, mitochondrial OS=Homo sapiens GN=ACAD9 PE=1 SV=1	1	1	NA	1	NA	8	8	NA	2	2	NA	3	3	NA	6.2528	6.2528	NA	TRUE	FALSE	TRUE	0.402252609	24.25200025	2.374656854	0.037660334	0.374641965	-3.902358158	0.245750796	1	1	FA_8_3_UV - FA_8_3_noUV	Huh7	limma	0.037660334	0.374641965	FALSE	no hit	6.2528
ERH	P84090	Enhancer of rudimentary homolog OS=Homo sapiens GN=ERH PE=1 SV=1	2	1	1	1	1	8	8	8	2	2	2	4	3	4	7.43041	7.47715	7.38367	TRUE	TRUE	TRUE	0.287310424	24.34124714	2.363843524	0.03837691	0.374641965	-3.919715759	0.247907543	1	1	FA_8_3_UV - FA_8_3_noUV	Huh7	limma	0.03837691	0.374641965	FALSE	no hit	7.47715
VARS	A0A140T936|P26640	Valine--tRNA ligase (Fragment) OS=Homo sapiens GN=VARS PE=1 SV=1|Valine--tRNA ligase OS=Homo sapiens GN=VARS PE=1 SV=4	2	1	1	1	1	8	8	8	2	2	2	15	15	11	7.158	7.64076	6.67524	TRUE	TRUE	TRUE	-0.255366014	26.48736472	-2.361588758	0.038527989	0.374641965	-3.923332405	0.248358926	1	1	FA_8_3_UV - FA_8_3_noUV	Huh7	limma	0.038527989	0.374641965	FALSE	no hit	7.64076
WDR77	Q9BQA1|Q9BQA1-2	Methylosome protein 50 OS=Homo sapiens GN=WDR77 PE=1 SV=1|Isoform 2 of Methylosome protein 50 OS=Homo sapiens GN=WDR77	1	1	NA	1	NA	8	8	NA	2	2	NA	2	2	NA	6.14202	6.14202	NA	TRUE	FALSE	TRUE	-0.359120349	22.86587834	-2.355330905	0.038950327	0.374641965	-3.93336504	0.249614701	1	1	FA_8_3_UV - FA_8_3_noUV	Huh7	limma	0.038950327	0.374641965	FALSE	no hit	6.14202
TSFM	P43897	Elongation factor Ts, mitochondrial OS=Homo sapiens GN=TSFM PE=1 SV=2	2	1	1	1	1	8	8	8	2	2	2	3	2	3	6.18331	6.45447	5.91215	TRUE	TRUE	TRUE	0.299561037	23.61615802	2.353983637	0.03904184	0.374641965	-3.935524028	0.249885639	1	1	FA_8_3_UV - FA_8_3_noUV	Huh7	limma	0.03904184	0.374641965	FALSE	no hit	6.45447
RPS19	P39019	40S ribosomal protein S19 OS=Homo sapiens GN=RPS19 PE=1 SV=2	2	1	1	1	1	8	8	8	2	2	2	5	5	5	6.603685	6.63161	6.57576	TRUE	TRUE	TRUE	-0.350228496	23.79978277	-2.352252888	0.039159707	0.374641965	-3.938297042	0.250233997	1	1	FA_8_3_UV - FA_8_3_noUV	Huh7	limma	0.039159707	0.374641965	FALSE	no hit	6.63161
ETFB	P38117|P38117-2	Electron transfer flavoprotein subunit beta OS=Homo sapiens GN=ETFB PE=1 SV=3|Isoform 2 of Electron transfer flavoprotein subunit beta OS=Homo sapiens GN=ETFB	2	1	1	1	1	8	8	8	2	2	2	7	7	5	6.705415	7.09168	6.31915	TRUE	TRUE	TRUE	0.221734576	24.91281617	2.349672924	0.039336049	0.374641965	-3.942429618	0.250753911	1	1	FA_8_3_UV - FA_8_3_noUV	Huh7	limma	0.039336049	0.374641965	FALSE	no hit	7.09168
PDCL3	H7BZP2|Q9H2J4	Phosducin-like protein 3 (Fragment) OS=Homo sapiens GN=PDCL3 PE=1 SV=1|Phosducin-like protein 3 OS=Homo sapiens GN=PDCL3 PE=1 SV=1	1	1	NA	1	NA	8	8	NA	2	2	NA	2	2	NA	6.15538	6.15538	NA	TRUE	FALSE	TRUE	-0.316972614	23.30340468	-2.346882294	0.039527657	0.374641965	-3.946898216	0.251317127	1	1	FA_8_3_UV - FA_8_3_noUV	Huh7	limma	0.039527657	0.374641965	FALSE	no hit	6.15538
PPIF	P30405	Peptidyl-prolyl cis-trans isomerase F, mitochondrial OS=Homo sapiens GN=PPIF PE=1 SV=1	2	1	1	1	1	8	8	8	2	2	2	12	4	12	7.57194	7.11631	8.02757	TRUE	TRUE	TRUE	0.444173964	24.56852482	2.341127736	0.039925637	0.374641965	-3.956108207	0.25248132	1	1	FA_8_3_UV - FA_8_3_noUV	Huh7	limma	0.039925637	0.374641965	FALSE	no hit	7.11631
GLRX3	O76003	Glutaredoxin-3 OS=Homo sapiens GN=GLRX3 PE=1 SV=2	2	1	1	1	1	8	8	8	2	2	2	3	2	3	6.0268	6.28325	5.77035	TRUE	TRUE	TRUE	-0.447809882	23.56934173	-2.340310255	0.039982487	0.374641965	-3.957416043	0.252647007	1	1	FA_8_3_UV - FA_8_3_noUV	Huh7	limma	0.039982487	0.374641965	FALSE	no hit	6.28325
DDX21	Q9NR30|Q9NR30-2	Nucleolar RNA helicase 2 OS=Homo sapiens GN=DDX21 PE=1 SV=5|Isoform 2 of Nucleolar RNA helicase 2 OS=Homo sapiens GN=DDX21	2	1	1	1	1	8	8	8	2	2	2	10	10	6	6.74071	6.94889	6.53253	TRUE	TRUE	TRUE	0.253837921	25.39703054	2.338341346	0.040119735	0.374641965	-3.960565446	0.253046377	1	1	FA_8_3_UV - FA_8_3_noUV	Huh7	limma	0.040119735	0.374641965	FALSE	no hit	6.94889
PLEC	Q15149|Q15149-2|Q15149-3|Q15149-4|Q15149-5|Q15149-6|Q15149-7|Q15149-8|Q15149-9	Plectin OS=Homo sapiens GN=PLEC PE=1 SV=3|Isoform 2 of Plectin OS=Homo sapiens GN=PLEC|Isoform 3 of Plectin OS=Homo sapiens GN=PLEC|Isoform 4 of Plectin OS=Homo sapiens GN=PLEC|Isoform 5 of Plectin OS=Homo sapiens GN=PLEC|Isoform 6 of Plectin OS=Homo sapiens GN=PLEC|Isoform 7 of Plectin OS=Homo sapiens GN=PLEC|Isoform 8 of Plectin OS=Homo sapiens GN=PLEC|Isoform 9 of Plectin OS=Homo sapiens GN=PL…	2	1	1	1	1	8	8	8	2	2	2	163	163	94	7.72702	8.28522	7.16882	TRUE	TRUE	TRUE	0.221183561	30.17776006	2.328732592	0.040796117	0.374641965	-3.97592447	0.255001709	1	1	FA_8_3_UV - FA_8_3_noUV	Huh7	limma	0.040796117	0.374641965	FALSE	no hit	8.28522
CLIC4	Q9Y696	Chloride intracellular channel protein 4 OS=Homo sapiens GN=CLIC4 PE=1 SV=4	2	1	1	1	1	8	8	8	2	2	2	7	7	3	7.133475	7.88584	6.38111	TRUE	TRUE	TRUE	-0.36962918	25.87060115	-2.322543114	0.041237647	0.374641965	-3.985808364	0.256266786	1	1	FA_8_3_UV - FA_8_3_noUV	Huh7	limma	0.041237647	0.374641965	FALSE	no hit	7.88584
ACOT9	H7C5Q2|Q9Y305|Q9Y305-2|Q9Y305-3|Q9Y305-4	Acyl-coenzyme A thioesterase 9, mitochondrial (Fragment) OS=Homo sapiens GN=ACOT9 PE=1 SV=1|Acyl-coenzyme A thioesterase 9, mitochondrial OS=Homo sapiens GN=ACOT9 PE=1 SV=2|Isoform 2 of Acyl-coenzyme A thioesterase 9, mitochondrial OS=Homo sapiens GN=ACOT9|Isoform 3 of Acyl-coenzyme A thioesterase 9, mitochondrial OS=Homo sapiens GN=ACOT9|Isoform 4 of Acyl-coenzyme A thioesterase 9, mitochondrial…	1	1	NA	1	NA	8	8	NA	2	2	NA	3	3	NA	6.14273	6.14273	NA	TRUE	FALSE	TRUE	0.311400267	22.86659664	2.310051174	0.042142903	0.374641965	-4.005733237	0.258833292	1	1	FA_8_3_UV - FA_8_3_noUV	Huh7	limma	0.042142903	0.374641965	FALSE	no hit	6.14273
BUB3	J3QT28|O43684|O43684-2	Isoform 2 of Mitotic checkpoint protein BUB3 OS=Homo sapiens GN=BUB3|Mitotic checkpoint protein BUB3 (Fragment) OS=Homo sapiens GN=BUB3 PE=1 SV=1|Mitotic checkpoint protein BUB3 OS=Homo sapiens GN=BUB3 PE=1 SV=1	2	1	1	1	1	8	8	8	2	2	2	3	3	3	6.382825	6.47327	6.29238	TRUE	TRUE	TRUE	-0.433023453	23.69491118	-2.306389428	0.042411884	0.374641965	-4.011567797	0.259588973	1	1	FA_8_3_UV - FA_8_3_noUV	Huh7	limma	0.042411884	0.374641965	FALSE	no hit	6.47327
ACAT1	P24752	Acetyl-CoA acetyltransferase, mitochondrial OS=Homo sapiens GN=ACAT1 PE=1 SV=1	2	1	1	1	1	8	8	8	2	2	2	7	2	7	6.903785	6.94158	6.86599	TRUE	TRUE	TRUE	0.28521885	23.51151694	2.303978079	0.042589921	0.374641965	-4.015408498	0.260087441	1	1	FA_8_3_UV - FA_8_3_noUV	Huh7	limma	0.042589921	0.374641965	FALSE	no hit	6.94158
EEF1D	E9PRY8|P29692|P29692-2|P29692-3	Elongation factor 1-delta OS=Homo sapiens GN=EEF1D PE=1 SV=1|Elongation factor 1-delta OS=Homo sapiens GN=EEF1D PE=1 SV=5|Isoform 2 of Elongation factor 1-delta OS=Homo sapiens GN=EEF1D|Isoform 3 of Elongation factor 1-delta OS=Homo sapiens GN=EEF1D	2	1	1	1	1	8	8	8	2	2	2	7	4	7	6.814835	6.82863	6.80104	TRUE	TRUE	TRUE	-0.387528794	24.17625473	-2.302618254	0.042690639	0.374641965	-4.017573847	0.260368832	1	1	FA_8_3_UV - FA_8_3_noUV	Huh7	limma	0.042690639	0.374641965	FALSE	no hit	6.82863
PSME3	B3KQ25|K7ESG5|P61289|P61289-2|P61289-3	Proteasome activator complex subunit 3 OS=Homo sapiens GN=PSME3 PE=1 SV=1|Proteasome activator complex subunit 3 OS=Homo sapiens GN=PSME3 PE=1 SV=1|Proteasome activator complex subunit 3 OS=Homo sapiens GN=PSME3 PE=1 SV=1|Isoform 2 of Proteasome activator complex subunit 3 OS=Homo sapiens GN=PSME3|Isoform 3 of Proteasome activator complex subunit 3 OS=Homo sapiens GN=PSME3	1	1	NA	1	NA	8	8	NA	2	2	NA	3	3	NA	6.27809	6.27809	NA	TRUE	FALSE	TRUE	-0.261565207	23.58174067	-2.298333577	0.043009501	0.374641965	-4.024394151	0.261256846	1	1	FA_8_3_UV - FA_8_3_noUV	Huh7	limma	0.043009501	0.374641965	FALSE	no hit	6.27809
EPRS	P07814	Bifunctional glutamate/proline--tRNA ligase OS=Homo sapiens GN=EPRS PE=1 SV=5	2	1	1	1	1	8	8	8	2	2	2	12	12	2	6.771725	7.26959	6.27386	TRUE	TRUE	TRUE	-0.380516825	26.375082	-2.29449475	0.043297137	0.374641965	-4.03050152	0.262054234	1	1	FA_8_3_UV - FA_8_3_noUV	Huh7	limma	0.043297137	0.374641965	FALSE	no hit	7.26959
HSP90AA1	P07900|P07900-2	Heat shock protein HSP 90-alpha OS=Homo sapiens GN=HSP90AA1 PE=1 SV=5|Isoform 2 of Heat shock protein HSP 90-alpha OS=Homo sapiens GN=HSP90AA1	2	1	1	1	1	8	8	8	2	2	2	21	21	16	7.90694	8.25147	7.56241	TRUE	TRUE	TRUE	-0.344244483	27.6626972	-2.288524667	0.043748159	0.374641965	-4.039993471	0.263297655	1	1	FA_8_3_UV - FA_8_3_noUV	Huh7	limma	0.043748159	0.374641965	FALSE	no hit	8.25147
USP5	P45974|P45974-2	Ubiquitin carboxyl-terminal hydrolase 5 OS=Homo sapiens GN=USP5 PE=1 SV=2|Isoform Short of Ubiquitin carboxyl-terminal hydrolase 5 OS=Homo sapiens GN=USP5	1	1	NA	1	NA	8	8	NA	2	2	NA	8	8	NA	7.0912	7.0912	NA	TRUE	FALSE	TRUE	-0.46094511	25.55191316	-2.286796841	0.043879536	0.374641965	-4.042739176	0.263658277	1	1	FA_8_3_UV - FA_8_3_noUV	Huh7	limma	0.043879536	0.374641965	FALSE	no hit	7.0912
MRPL20	Q9BYC9	39S ribosomal protein L20, mitochondrial OS=Homo sapiens GN=MRPL20 PE=1 SV=1	1	1	NA	1	NA	8	8	NA	2	2	NA	2	2	NA	6.06068	6.06068	NA	TRUE	FALSE	TRUE	0.310822884	22.87979805	2.286780272	0.043880797	0.374641965	-4.042765502	0.263661737	1	1	FA_8_3_UV - FA_8_3_noUV	Huh7	limma	0.043880797	0.374641965	FALSE	no hit	6.06068
SMS	P52788	Spermine synthase OS=Homo sapiens GN=SMS PE=1 SV=2	1	1	NA	1	NA	8	8	NA	2	2	NA	6	6	NA	6.96634	6.96634	NA	TRUE	FALSE	TRUE	-0.359414796	25.11270905	-2.279487029	0.044439569	0.374641965	-4.054348245	0.26518771	1	1	FA_8_3_UV - FA_8_3_noUV	Huh7	limma	0.044439569	0.374641965	FALSE	no hit	6.96634
AKR1C3	A0A0A0MSS8|P42330|P42330-2|S4R3Z2	Aldo-keto reductase family 1 member C3 OS=Homo sapiens GN=AKR1C3 PE=1 SV=1|Aldo-keto reductase family 1 member C3 OS=Homo sapiens GN=AKR1C3 PE=1 SV=4|Isoform 2 of Aldo-keto reductase family 1 member C3 OS=Homo sapiens GN=AKR1C3|Aldo-keto reductase family 1 member C3 OS=Homo sapiens GN=AKR1C3 PE=1 SV=1	1	1	NA	1	NA	8	8	NA	2	2	NA	4	4	NA	7.30565	7.30565	NA	TRUE	FALSE	TRUE	-0.382418705	24.85935729	-2.278624682	0.04450609	0.374641965	-4.055717028	0.265368541	1	1	FA_8_3_UV - FA_8_3_noUV	Huh7	limma	0.04450609	0.374641965	FALSE	no hit	7.30565
XRCC5	P13010	X-ray repair cross-complementing protein 5 OS=Homo sapiens GN=XRCC5 PE=1 SV=3	2	1	1	1	1	8	8	8	2	2	2	18	14	18	7.58573	7.53831	7.63315	TRUE	TRUE	TRUE	-0.269581279	26.34707055	-2.278099257	0.044546668	0.374641965	-4.056550945	0.265478762	1	1	FA_8_3_UV - FA_8_3_noUV	Huh7	limma	0.044546668	0.374641965	FALSE	no hit	7.53831
MAPRE3	Q9UPY8|Q9UPY8-2	Microtubule-associated protein RP/EB family member 3 OS=Homo sapiens GN=MAPRE3 PE=1 SV=1|Isoform 2 of Microtubule-associated protein RP/EB family member 3 OS=Homo sapiens GN=MAPRE3	1	1	NA	1	NA	8	8	NA	2	2	NA	2	2	NA	6.69239	6.69239	NA	TRUE	FALSE	TRUE	-0.420098629	23.83062805	-2.261466902	0.045849767	0.374641965	-4.082917676	0.26898413	1	1	FA_8_3_UV - FA_8_3_noUV	Huh7	limma	0.045849767	0.374641965	FALSE	no hit	6.69239
XPOT	O43592	Exportin-T OS=Homo sapiens GN=XPOT PE=1 SV=2	1	1	NA	1	NA	8	8	NA	2	2	NA	4	4	NA	6.10347	6.10347	NA	TRUE	FALSE	TRUE	-0.383132288	23.82737793	-2.259920552	0.045972769	0.374641965	-4.085365976	0.26931164	1	1	FA_8_3_UV - FA_8_3_noUV	Huh7	limma	0.045972769	0.374641965	FALSE	no hit	6.10347
EIF4G2	D3DQV9|H0Y3P2|P78344|P78344-2	Eukaryotic translation initiation factor 4 gamma 2 (Fragment) OS=Homo sapiens GN=EIF4G2 PE=1 SV=1|Eukaryotic translation initiation factor 4 gamma 2 OS=Homo sapiens GN=EIF4G2 PE=1 SV=1|Eukaryotic translation initiation factor 4 gamma 2 OS=Homo sapiens GN=EIF4G2 PE=1 SV=1|Isoform 2 of Eukaryotic translation initiation factor 4 gamma 2 OS=Homo sapiens GN=EIF4G2	1	1	NA	1	NA	8	8	NA	2	2	NA	7	7	NA	6.63655	6.63655	NA	TRUE	FALSE	TRUE	-0.28530982	25.35333827	-2.240808162	0.047519503	0.374641965	-4.115582063	0.27338215	1	1	FA_8_3_UV - FA_8_3_noUV	Huh7	limma	0.047519503	0.374641965	FALSE	no hit	6.63655
MTHFD1	F5H2F4|P11586	C-1-tetrahydrofolate synthase, cytoplasmic OS=Homo sapiens GN=MTHFD1 PE=1 SV=1|C-1-tetrahydrofolate synthase, cytoplasmic OS=Homo sapiens GN=MTHFD1 PE=1 SV=3	1	1	NA	1	NA	8	8	NA	2	2	NA	7	7	NA	6.60853	6.60853	NA	TRUE	FALSE	TRUE	-0.279880199	24.94027577	-2.235865732	0.04792756	0.374641965	-4.123382421	0.274441587	1	1	FA_8_3_UV - FA_8_3_noUV	Huh7	limma	0.04792756	0.374641965	FALSE	no hit	6.60853
KIF5B	P33176	Kinesin-1 heavy chain OS=Homo sapiens GN=KIF5B PE=1 SV=1	1	1	NA	1	NA	8	8	NA	2	2	NA	9	9	NA	6.78492	6.78492	NA	TRUE	FALSE	TRUE	-0.326297077	25.47443787	-2.232049086	0.048244973	0.374641965	-4.129402174	0.275261623	1	1	FA_8_3_UV - FA_8_3_noUV	Huh7	limma	0.048244973	0.374641965	FALSE	no hit	6.78492
PSMA5	P28066|P28066-2	Isoform 2 of Proteasome subunit alpha type-5 OS=Homo sapiens GN=PSMA5|Proteasome subunit alpha type-5 OS=Homo sapiens GN=PSMA5 PE=1 SV=3	2	1	1	1	1	8	8	8	2	2	2	6	3	6	6.522885	6.73073	6.31504	TRUE	TRUE	TRUE	-0.334987291	24.58365817	-2.225261039	0.048814498	0.374641965	-4.140100186	0.276724215	1	1	FA_8_3_UV - FA_8_3_noUV	Huh7	limma	0.048814498	0.374641965	FALSE	no hit	6.73073
FKBP4	Q02790	Peptidyl-prolyl cis-trans isomerase FKBP4 OS=Homo sapiens GN=FKBP4 PE=1 SV=3	2	1	1	1	1	8	8	8	2	2	2	7	7	4	6.80501	7.20803	6.40199	TRUE	TRUE	TRUE	-0.427238204	24.98116491	-2.223727651	0.048944042	0.374641965	-4.142515327	0.27705534	1	1	FA_8_3_UV - FA_8_3_noUV	Huh7	limma	0.048944042	0.374641965	FALSE	no hit	7.20803
CASK	O14936|O14936-3	Peripheral plasma membrane protein CASK OS=Homo sapiens GN=CASK PE=1 SV=3|Isoform 3 of Peripheral plasma membrane protein CASK OS=Homo sapiens GN=CASK	1	1	NA	1	NA	8	8	NA	2	2	NA	3	3	NA	6.09146	6.09146	NA	TRUE	FALSE	TRUE	0.544903793	22.59737969	2.22262963	0.049037008	0.374641965	-4.144244413	0.277292616	1	1	FA_8_3_UV - FA_8_3_noUV	Huh7	limma	0.049037008	0.374641965	FALSE	no hit	6.09146
EIF4A1	P60842	Eukaryotic initiation factor 4A-I OS=Homo sapiens GN=EIF4A1 PE=1 SV=1	1	1	NA	1	NA	8	8	NA	2	2	NA	5	5	NA	7.17181	7.17181	NA	TRUE	FALSE	TRUE	-0.266282718	25.07161476	-2.216902458	0.049524664	0.374641965	-4.153258549	0.278532469	1	1	FA_8_3_UV - FA_8_3_noUV	Huh7	limma	0.049524664	0.374641965	FALSE	no hit	7.17181
HSPH1	Q92598|Q92598-2|Q92598-3|Q92598-4	Heat shock protein 105 kDa OS=Homo sapiens GN=HSPH1 PE=1 SV=1|Isoform 3 of Heat shock protein 105 kDa OS=Homo sapiens GN=HSPH1|Isoform 4 of Heat shock protein 105 kDa OS=Homo sapiens GN=HSPH1|Isoform Beta of Heat shock protein 105 kDa OS=Homo sapiens GN=HSPH1	2	1	1	1	1	8	8	8	2	2	2	9	9	5	6.587765	6.87151	6.30402	TRUE	TRUE	TRUE	-0.386512008	24.91008358	-2.216655293	0.049545814	0.374641965	-4.153647393	0.278586061	1	1	FA_8_3_UV - FA_8_3_noUV	Huh7	limma	0.049545814	0.374641965	FALSE	no hit	6.87151
RBM14	Q96PK6	RNA-binding protein 14 OS=Homo sapiens GN=RBM14 PE=1 SV=2	2	1	1	1	1	8	8	8	2	2	2	2	2	2	6.437975	6.84874	6.02721	TRUE	TRUE	TRUE	0.307433932	23.81126893	2.215376567	0.049655373	0.374641965	-4.155658878	0.278863438	1	1	FA_8_3_UV - FA_8_3_noUV	Huh7	limma	0.049655373	0.374641965	FALSE	no hit	6.84874
RPLP0	F8VPE8|F8VQY6|F8VRK7|F8VU65|F8VW21|F8VWS0|G3V210|P05388|P05388-2	60S acidic ribosomal protein P0 (Fragment) OS=Homo sapiens GN=RPLP0 PE=1 SV=1|60S acidic ribosomal protein P0 OS=Homo sapiens GN=RPLP0 PE=1 SV=1|Isoform 2 of 60S acidic ribosomal protein P0 OS=Homo sapiens GN=RPLP0	2	1	1	1	1	8	8	8	2	2	2	4	4	3	6.533805	6.64062	6.42699	TRUE	TRUE	TRUE	-0.221348254	25.19653938	-2.210993607	0.050032664	0.374641965	-4.162550486	0.279815601	1	1	FA_8_3_UV - FA_8_3_noUV	Huh7	limma	0.050032664	0.374641965	FALSE	no hit	6.64062
MIA3	Q5JRA6|Q5JRA6-2	Melanoma inhibitory activity protein 3 OS=Homo sapiens GN=MIA3 PE=1 SV=1|Isoform 2 of Melanoma inhibitory activity protein 3 OS=Homo sapiens GN=MIA3	2	1	1	1	1	8	8	8	2	2	2	6	2	6	6.093685	5.99954	6.18783	TRUE	TRUE	TRUE	0.282242443	22.96343882	2.210821785	0.050047511	0.374641965	-4.162820558	0.279852972	1	1	FA_8_3_UV - FA_8_3_noUV	Huh7	limma	0.050047511	0.374641965	FALSE	no hit	5.99954
EIF3D	O15371|O15371-2|O15371-3	Eukaryotic translation initiation factor 3 subunit D OS=Homo sapiens GN=EIF3D PE=1 SV=1|Isoform 2 of Eukaryotic translation initiation factor 3 subunit D OS=Homo sapiens GN=EIF3D|Isoform 3 of Eukaryotic translation initiation factor 3 subunit D OS=Homo sapiens GN=EIF3D	1	1	NA	1	NA	8	8	NA	2	2	NA	5	5	NA	7.29035	7.29035	NA	TRUE	FALSE	TRUE	-0.226016139	24.48037881	-2.210449706	0.050079675	0.374641965	-4.163405376	0.279933913	1	1	FA_8_3_UV - FA_8_3_noUV	Huh7	limma	0.050079675	0.374641965	FALSE	no hit	7.29035
STAG1	Q8WVM7|Q8WVM7-2	Cohesin subunit SA-1 OS=Homo sapiens GN=STAG1 PE=1 SV=3|Isoform 2 of Cohesin subunit SA-1 OS=Homo sapiens GN=STAG1	1	1	NA	1	NA	8	8	NA	2	2	NA	2	2	NA	6.37149	6.37149	NA	TRUE	FALSE	TRUE	0.712302741	23.18036851	2.209811646	0.050134879	0.374641965	-4.164408172	0.28007275	1	1	FA_8_3_UV - FA_8_3_noUV	Huh7	limma	0.050134879	0.374641965	FALSE	no hit	6.37149
EZR	E7EQR4|P15311	Ezrin OS=Homo sapiens GN=EZR PE=1 SV=3|Ezrin OS=Homo sapiens GN=EZR PE=1 SV=4	2	1	1	1	1	8	8	8	2	2	2	12	12	6	7.13119	7.73367	6.52871	TRUE	TRUE	TRUE	-0.269361783	26.3108335	-2.208318913	0.050264254	0.374641965	-4.166753821	0.28039774	1	1	FA_8_3_UV - FA_8_3_noUV	Huh7	limma	0.050264254	0.374641965	FALSE	no hit	7.73367
POLDIP2	B4DEM9|Q9Y2S7	Polymerase delta-interacting protein 2 OS=Homo sapiens GN=POLDIP2 PE=1 SV=1|Polymerase delta-interacting protein 2 OS=Homo sapiens GN=POLDIP2 PE=1 SV=1	1	1	NA	1	NA	8	8	NA	2	2	NA	5	5	NA	6.68764	6.68764	NA	TRUE	FALSE	TRUE	0.214177359	24.50528508	2.205809941	0.050482429	0.374641965	-4.17069516	0.280944558	1	1	FA_8_3_UV - FA_8_3_noUV	Huh7	limma	0.050482429	0.374641965	FALSE	no hit	6.68764
RACK1	H0Y8W2|J3KPE3|P63244	Receptor of-activated protein C kinase 1 (Fragment) OS=Homo sapiens GN=RACK1 PE=1 SV=1|Receptor of-activated protein C kinase 1 OS=Homo sapiens GN=RACK1 PE=1 SV=1|Receptor of activated protein C kinase 1 OS=Homo sapiens GN=RACK1 PE=1 SV=3	2	1	1	1	1	8	8	8	2	2	2	14	14	7	7.24997	7.78857	6.71137	TRUE	TRUE	TRUE	-0.330348157	26.72283686	-2.204531465	0.050593951	0.374641965	-4.172702932	0.281223474	1	1	FA_8_3_UV - FA_8_3_noUV	Huh7	limma	0.050593951	0.374641965	FALSE	no hit	7.78857
DPP3	G3V180|G3V1D3|Q9NY33|Q9NY33-4	Dipeptidyl peptidase 3 OS=Homo sapiens GN=DPP3 PE=1 SV=1|Dipeptidyl peptidase 3 OS=Homo sapiens GN=DPP3 PE=1 SV=2|Isoform 4 of Dipeptidyl peptidase 3 OS=Homo sapiens GN=DPP3	2	1	1	1	1	8	8	8	2	2	2	10	10	6	6.712045	7.0208	6.40329	TRUE	TRUE	TRUE	-0.438202134	25.970941	-2.201387674	0.050869191	0.374641965	-4.177638391	0.281910131	1	1	FA_8_3_UV - FA_8_3_noUV	Huh7	limma	0.050869191	0.374641965	FALSE	no hit	7.0208
COPG1	Q9Y678	Coatomer subunit gamma-1 OS=Homo sapiens GN=COPG1 PE=1 SV=1	2	1	1	1	1	8	8	8	2	2	2	11	11	4	6.6367	7.10777	6.16563	TRUE	TRUE	TRUE	-0.219559085	25.62996911	-2.201153352	0.050889763	0.374641965	-4.178006159	0.281961357	1	1	FA_8_3_UV - FA_8_3_noUV	Huh7	limma	0.050889763	0.374641965	FALSE	no hit	7.10777
LDHB	P07195	L-lactate dehydrogenase B chain OS=Homo sapiens GN=LDHB PE=1 SV=2	2	1	1	1	1	8	8	8	2	2	2	8	7	8	7.3751	7.57187	7.17833	TRUE	TRUE	TRUE	-0.507346763	26.12189671	-2.200983973	0.050904639	0.374641965	-4.178271991	0.281998389	1	1	FA_8_3_UV - FA_8_3_noUV	Huh7	limma	0.050904639	0.374641965	FALSE	no hit	7.57187
LDHA	P00338|P00338-3	L-lactate dehydrogenase A chain OS=Homo sapiens GN=LDHA PE=1 SV=2|Isoform 3 of L-lactate dehydrogenase A chain OS=Homo sapiens GN=LDHA	2	1	1	1	1	8	8	8	2	2	2	11	8	11	7.397285	7.56735	7.22722	TRUE	TRUE	TRUE	-0.374745073	26.18440212	-2.192059577	0.051694334	0.374641965	-4.192268469	0.283954235	1	1	FA_8_3_UV - FA_8_3_noUV	Huh7	limma	0.051694334	0.374641965	FALSE	no hit	7.56735
IMP3	Q9NV31	U3 small nucleolar ribonucleoprotein protein IMP3 OS=Homo sapiens GN=IMP3 PE=1 SV=1	1	1	NA	1	NA	8	8	NA	2	2	NA	2	2	NA	5.85631	5.85631	NA	TRUE	FALSE	TRUE	0.479591135	22.38608821	2.188823847	0.051983541	0.374641965	-4.19733836	0.284665632	1	1	FA_8_3_UV - FA_8_3_noUV	Huh7	limma	0.051983541	0.374641965	FALSE	no hit	5.85631
SEC31A	D6REX3|D6RHZ5|O94979|O94979-2|O94979-3|O94979-8|O94979-9	Protein transport protein Sec31A OS=Homo sapiens GN=SEC31A PE=1 SV=1|Protein transport protein Sec31A OS=Homo sapiens GN=SEC31A PE=1 SV=1|Protein transport protein Sec31A OS=Homo sapiens GN=SEC31A PE=1 SV=3|Isoform 2 of Protein transport protein Sec31A OS=Homo sapiens GN=SEC31A|Isoform 3 of Protein transport protein Sec31A OS=Homo sapiens GN=SEC31A|Isoform 8 of Protein transport protein Sec31A OS…	1	1	NA	1	NA	8	8	NA	2	2	NA	7	7	NA	7.09493	7.09493	NA	TRUE	FALSE	TRUE	-0.221109159	25.59076225	-2.188455304	0.052016579	0.374641965	-4.197915646	0.284746735	1	1	FA_8_3_UV - FA_8_3_noUV	Huh7	limma	0.052016579	0.374641965	FALSE	no hit	7.09493
MTHFD1L	A0A087WVM4|B7ZM99|Q6UB35	Monofunctional C1-tetrahydrofolate synthase, mitochondrial OS=Homo sapiens GN=MTHFD1L PE=1 SV=1|MTHFD1L protein OS=Homo sapiens GN=MTHFD1L PE=1 SV=1|Monofunctional C1-tetrahydrofolate synthase, mitochondrial OS=Homo sapiens GN=MTHFD1L PE=1 SV=1	1	1	NA	1	NA	8	8	NA	2	2	NA	8	8	NA	6.58142	6.58142	NA	TRUE	FALSE	TRUE	0.360007542	25.28625614	2.179540522	0.052821892	0.374641965	-4.211869477	0.28671332	1	1	FA_8_3_UV - FA_8_3_noUV	Huh7	limma	0.052821892	0.374641965	FALSE	no hit	6.58142
EIF3B	P55884|P55884-2	Eukaryotic translation initiation factor 3 subunit B OS=Homo sapiens GN=EIF3B PE=1 SV=3|Isoform 2 of Eukaryotic translation initiation factor 3 subunit B OS=Homo sapiens GN=EIF3B	2	1	1	1	1	8	8	8	2	2	2	10	10	3	6.304825	6.81974	5.78991	TRUE	TRUE	TRUE	-0.274620625	25.69263316	-2.176614214	0.053088827	0.374641965	-4.216445537	0.287360854	1	1	FA_8_3_UV - FA_8_3_noUV	Huh7	limma	0.053088827	0.374641965	FALSE	no hit	6.81974
MRE11A	F8W7U8|P49959|P49959-2|P49959-3	Double-strand break repair protein MRE11A OS=Homo sapiens GN=MRE11A PE=1 SV=1|Double-strand break repair protein MRE11A OS=Homo sapiens GN=MRE11A PE=1 SV=3|Isoform 2 of Double-strand break repair protein MRE11A OS=Homo sapiens GN=MRE11A|Isoform 3 of Double-strand break repair protein MRE11A OS=Homo sapiens GN=MRE11A	2	1	1	1	1	8	8	8	2	2	2	2	2	2	5.696295	5.88195	5.51064	TRUE	TRUE	TRUE	0.326161897	22.07487033	2.173227549	0.053399365	0.374641965	-4.22173879	0.288111485	1	1	FA_8_3_UV - FA_8_3_noUV	Huh7	limma	0.053399365	0.374641965	FALSE	no hit	5.88195
ATP6V1E1	C9J8H1|P36543|P36543-2|P36543-3	Isoform 2 of V-type proton ATPase subunit E 1 OS=Homo sapiens GN=ATP6V1E1|Isoform 3 of V-type proton ATPase subunit E 1 OS=Homo sapiens GN=ATP6V1E1|V-type proton ATPase subunit E 1 (Fragment) OS=Homo sapiens GN=ATP6V1E1 PE=1 SV=1|V-type proton ATPase subunit E 1 OS=Homo sapiens GN=ATP6V1E1 PE=1 SV=1	2	1	1	1	1	8	8	8	2	2	2	2	2	2	6.18211	6.2852	6.07902	TRUE	TRUE	TRUE	0.218404747	23.53762239	2.169343627	0.053757635	0.374641965	-4.227805665	0.288973958	1	1	FA_8_3_UV - FA_8_3_noUV	Huh7	limma	0.053757635	0.374641965	FALSE	no hit	6.2852
BPNT1	A6NF51|O95861|O95861-2|O95861-4	3'(2'),5'-bisphosphate nucleotidase 1 OS=Homo sapiens GN=BPNT1 PE=1 SV=1|3'(2'),5'-bisphosphate nucleotidase 1 OS=Homo sapiens GN=BPNT1 PE=1 SV=2|Isoform 2 of 3'(2'),5'-bisphosphate nucleotidase 1 OS=Homo sapiens GN=BPNT1|Isoform 4 of 3'(2'),5'-bisphosphate nucleotidase 1 OS=Homo sapiens GN=BPNT1	2	1	1	1	1	8	8	8	2	2	2	5	5	3	6.365715	6.78947	5.94196	TRUE	TRUE	TRUE	-0.427000195	24.77634386	-2.16849843	0.053835903	0.374641965	-4.229125394	0.289161874	1	1	FA_8_3_UV - FA_8_3_noUV	Huh7	limma	0.053835903	0.374641965	FALSE	no hit	6.78947
DDX56	F8WDT8|G3V0G3|Q9NY93|Q9NY93-2	Probable ATP-dependent RNA helicase DDX56 OS=Homo sapiens GN=DDX56 PE=1 SV=1|DEAD (Asp-Glu-Ala-Asp) box polypeptide 56, isoform CRA_a OS=Homo sapiens GN=DDX56 PE=1 SV=1|Probable ATP-dependent RNA helicase DDX56 OS=Homo sapiens GN=DDX56 PE=1 SV=1|Isoform 2 of Probable ATP-dependent RNA helicase DDX56 OS=Homo sapiens GN=DDX56	1	1	NA	1	NA	8	8	NA	2	2	NA	2	2	NA	6.30963	6.30963	NA	TRUE	FALSE	TRUE	0.242543504	23.2187143	2.168231943	0.053860603	0.374641965	-4.229541462	0.28922114	1	1	FA_8_3_UV - FA_8_3_noUV	Huh7	limma	0.053860603	0.374641965	FALSE	no hit	6.30963
YWHAB	P31946|P31946-2	14-3-3protein beta/alpha OS=Homo sapiens GN=YWHAB PE=1 SV=3|Isoform Short of 14-3-3 protein beta/alpha OS=Homo sapiens GN=YWHAB	2	1	1	1	1	8	8	8	2	2	2	6	3	6	7.33691	7.33848	7.33534	TRUE	TRUE	TRUE	-0.555811092	24.79095125	-2.166444794	0.054026531	0.374641965	-4.232331278	0.289618811	1	1	FA_8_3_UV - FA_8_3_noUV	Huh7	limma	0.054026531	0.374641965	FALSE	no hit	7.33848
MTPAP	Q9NVV4|Q9NVV4-2	Poly(A) RNA polymerase, mitochondrial OS=Homo sapiens GN=MTPAP PE=1 SV=1|Isoform 2 of Poly(A) RNA polymerase, mitochondrial OS=Homo sapiens GN=MTPAP	1	1	NA	1	NA	8	8	NA	2	2	NA	2	2	NA	6.57218	6.57218	NA	TRUE	FALSE	TRUE	0.396988054	23.64821856	2.162755054	0.054370648	0.374641965	-4.238088532	0.290441005	1	1	FA_8_3_UV - FA_8_3_noUV	Huh7	limma	0.054370648	0.374641965	FALSE	no hit	6.57218
PDCD11	Q14690	Protein RRP5 homolog OS=Homo sapiens GN=PDCD11 PE=1 SV=3	1	1	NA	1	NA	8	8	NA	2	2	NA	5	5	NA	6.56195	6.56195	NA	TRUE	FALSE	TRUE	0.349959069	24.3706453	2.16221729	0.054420976	0.374641965	-4.238927335	0.290560968	1	1	FA_8_3_UV - FA_8_3_noUV	Huh7	limma	0.054420976	0.374641965	FALSE	no hit	6.56195
CNDP2	Q96KP4|Q96KP4-2	Cytosolic non-specific dipeptidase OS=Homo sapiens GN=CNDP2 PE=1 SV=2|Isoform 2 of Cytosolic non-specific dipeptidase OS=Homo sapiens GN=CNDP2	1	1	NA	1	NA	8	8	NA	2	2	NA	2	2	NA	5.79499	5.79499	NA	TRUE	FALSE	TRUE	-0.596649025	22.51177945	-2.15867971	0.054753159	0.374644345	-4.244443387	0.291350948	1	1	FA_8_3_UV - FA_8_3_noUV	Huh7	limma	0.054753159	0.374644345	FALSE	no hit	5.79499
IDH2	P48735|P48735-2	Isocitrate dehydrogenase [NADP], mitochondrial OS=Homo sapiens GN=IDH2 PE=1 SV=2|Isoform 2 of Isocitrate dehydrogenase [NADP], mitochondrial OS=Homo sapiens GN=IDH2	2	1	1	1	1	8	8	8	2	2	2	5	5	2	6.460415	7.04366	5.87717	TRUE	TRUE	TRUE	0.310040522	24.55749275	2.150865189	0.05549382	0.377424838	-4.256616852	0.29310113	1	1	FA_8_3_UV - FA_8_3_noUV	Huh7	limma	0.05549382	0.377424838	FALSE	no hit	7.04366
CAPZA1	P52907	F-actin-capping protein subunit alpha-1 OS=Homo sapiens GN=CAPZA1 PE=1 SV=3	2	1	1	1	1	8	8	8	2	2	2	9	4	9	6.52096	6.31532	6.7266	TRUE	TRUE	TRUE	-0.294889671	23.22682445	-2.137193312	0.056812662	0.38408081	-4.277876341	0.296180098	1	1	FA_8_3_UV - FA_8_3_noUV	Huh7	limma	0.056812662	0.38408081	FALSE	no hit	6.31532
EPB41L2	E9PHY5|O43491|O43491-3|O43491-4|Q6R5J7	4.1G isoform OS=Homo sapiens GN=EPB41L2 PE=1 SV=1|Band 4.1-like protein 2 OS=Homo sapiens GN=EPB41L2 PE=1 SV=1|Isoform 3 of Band 4.1-like protein 2 OS=Homo sapiens GN=EPB41L2|Isoform 4 of Band 4.1-like protein 2 OS=Homo sapiens GN=EPB41L2	2	1	1	1	1	8	8	8	2	2	2	2	2	2	6.02318	6.02794	6.01842	TRUE	TRUE	TRUE	0.362389108	22.5835918	2.126331628	0.057881633	0.388978355	-4.294730501	0.298641572	1	1	FA_8_3_UV - FA_8_3_noUV	Huh7	limma	0.057881633	0.388978355	FALSE	no hit	6.02794
RPS9	A0A024R4M0|P46781	40S ribosomal protein S9 OS=Homo sapiens GN=RPS9 PE=1 SV=1|40S ribosomal protein S9 OS=Homo sapiens GN=RPS9 PE=1 SV=3	2	1	1	1	1	8	8	8	2	2	2	7	7	3	6.39066	6.81111	5.97021	TRUE	TRUE	TRUE	-0.312840069	25.04890691	-2.11360421	0.059158555	0.39520715	-4.314438976	0.30154319	1	1	FA_8_3_UV - FA_8_3_noUV	Huh7	limma	0.059158555	0.39520715	FALSE	no hit	6.81111
DCTN1	E7EX90|Q14203|Q14203-2|Q14203-3|Q14203-4|Q14203-5|Q14203-6	Dynactin subunit 1 OS=Homo sapiens GN=DCTN1 PE=1 SV=1|Dynactin subunit 1 OS=Homo sapiens GN=DCTN1 PE=1 SV=3|Isoform p135 of Dynactin subunit 1 OS=Homo sapiens GN=DCTN1|Isoform 3 of Dynactin subunit 1 OS=Homo sapiens GN=DCTN1|Isoform 4 of Dynactin subunit 1 OS=Homo sapiens GN=DCTN1|Isoform 5 of Dynactin subunit 1 OS=Homo sapiens GN=DCTN1|Isoform 6 of Dynactin subunit 1 OS=Homo sapiens GN=DCTN1	1	1	NA	1	NA	8	8	NA	2	2	NA	7	7	NA	7.04169	7.04169	NA	TRUE	FALSE	TRUE	-0.244183933	25.47781186	-2.106764679	0.059855759	0.396170458	-4.325011593	0.303110206	1	1	FA_8_3_UV - FA_8_3_noUV	Huh7	limma	0.059855759	0.396170458	FALSE	no hit	7.04169
RPS12	P25398	40S ribosomal protein S12 OS=Homo sapiens GN=RPS12 PE=1 SV=3	2	1	1	1	1	8	8	8	2	2	2	3	3	3	6.416525	6.42119	6.41186	TRUE	TRUE	TRUE	-0.230557712	24.45747647	-2.099266546	0.060629055	0.396170458	-4.336587287	0.304834324	1	1	FA_8_3_UV - FA_8_3_noUV	Huh7	limma	0.060629055	0.396170458	FALSE	no hit	6.42119
ALDOA	P04075	Fructose-bisphosphate aldolase A OS=Homo sapiens GN=ALDOA PE=1 SV=2	2	1	1	1	1	8	8	8	2	2	2	17	15	17	7.46345	7.71025	7.21665	TRUE	TRUE	TRUE	-0.310466028	26.8295179	-2.09817339	0.060742583	0.396170458	-4.338273593	0.305086227	1	1	FA_8_3_UV - FA_8_3_noUV	Huh7	limma	0.060742583	0.396170458	FALSE	no hit	7.71025
GART	P22102	Trifunctional purine biosynthetic protein adenosine-3 OS=Homo sapiens GN=GART PE=1 SV=1	1	1	NA	1	NA	8	8	NA	2	2	NA	8	8	NA	6.95953	6.95953	NA	TRUE	FALSE	TRUE	-0.30030695	25.29943026	-2.092747436	0.061309071	0.396170458	-4.346638685	0.306338606	1	1	FA_8_3_UV - FA_8_3_noUV	Huh7	limma	0.061309071	0.396170458	FALSE	no hit	6.95953
KIAA1429	Q69YN4|Q69YN4-3	Protein virilizer homolog OS=Homo sapiens GN=KIAA1429 PE=1 SV=2|Isoform 3 of Protein virilizer homolog OS=Homo sapiens GN=KIAA1429	2	1	1	1	1	8	8	8	2	2	2	5	5	3	6.43785	6.7989	6.0768	TRUE	TRUE	TRUE	0.50940365	24.96229483	2.09164822	0.061424441	0.396170458	-4.348332308	0.306592734	1	1	FA_8_3_UV - FA_8_3_noUV	Huh7	limma	0.061424441	0.396170458	FALSE	no hit	6.7989
NAXE	Q8NCW5|Q8NCW5-2	NAD(P)H-hydrate epimerase OS=Homo sapiens GN=NAXE PE=1 SV=2|Isoform 2 of NAD(P)H-hydrate epimerase OS=Homo sapiens GN=NAXE	2	1	1	1	1	8	8	8	2	2	2	3	2	3	6.352185	6.69722	6.00715	TRUE	TRUE	TRUE	-0.388241289	23.46283878	-2.089599302	0.061640038	0.396170458	-4.35148827	0.307066795	1	1	FA_8_3_UV - FA_8_3_noUV	Huh7	limma	0.061640038	0.396170458	FALSE	no hit	6.69722
MGEA5	O60502|O60502-2|O60502-4	Protein O-GlcNAcase OS=Homo sapiens GN=MGEA5 PE=1 SV=2|Isoform 2 of Protein O-GlcNAcase OS=Homo sapiens GN=MGEA5|Isoform 4 of Protein O-GlcNAcase OS=Homo sapiens GN=MGEA5	1	1	NA	1	NA	8	8	NA	2	2	NA	6	6	NA	6.79154	6.79154	NA	TRUE	FALSE	TRUE	-0.349570567	25.36418102	-2.088470903	0.061759079	0.396170458	-4.353225838	0.307328082	1	1	FA_8_3_UV - FA_8_3_noUV	Huh7	limma	0.061759079	0.396170458	FALSE	no hit	6.79154
NUP54	Q7Z3B4|Q7Z3B4-3	Nucleoporin p54 OS=Homo sapiens GN=NUP54 PE=1 SV=2|Isoform 3 of Nucleoporin p54 OS=Homo sapiens GN=NUP54	1	1	NA	1	NA	8	8	NA	2	2	NA	3	3	NA	6.38955	6.38955	NA	TRUE	FALSE	TRUE	0.265511995	23.50189463	2.071108485	0.063618394	0.400974148	-4.37991514	0.311366996	1	1	FA_8_3_UV - FA_8_3_noUV	Huh7	limma	0.063618394	0.400974148	FALSE	no hit	6.38955
OSBPL1A	Q9BXW6|Q9BXW6-2|Q9BXW6-4	Oxysterol-binding protein-related protein 1 OS=Homo sapiens GN=OSBPL1A PE=1 SV=2|Isoform A of Oxysterol-binding protein-related protein 1 OS=Homo sapiens GN=OSBPL1A|Isoform 4 of Oxysterol-binding protein-related protein 1 OS=Homo sapiens GN=OSBPL1A	1	1	NA	1	NA	8	8	NA	2	2	NA	2	2	NA	6.83223	6.83223	NA	TRUE	FALSE	TRUE	-0.432951457	23.2296546	-2.069692377	0.063772355	0.400974148	-4.382088095	0.311697954	1	1	FA_8_3_UV - FA_8_3_noUV	Huh7	limma	0.063772355	0.400974148	FALSE	no hit	6.83223
ARHGDIA	J3KTF8|J3QQX2|P52565	Rho GDP-dissociation inhibitor 1 (Fragment) OS=Homo sapiens GN=ARHGDIA PE=1 SV=7|Rho GDP-dissociation inhibitor 1 OS=Homo sapiens GN=ARHGDIA PE=1 SV=1|Rho GDP-dissociation inhibitor 1 OS=Homo sapiens GN=ARHGDIA PE=1 SV=3	2	1	1	1	1	8	8	8	2	2	2	4	3	4	7.10196	7.27566	6.92826	TRUE	TRUE	TRUE	-0.490998159	24.12230401	-2.068922635	0.063856189	0.400974148	-4.383268985	0.311877947	1	1	FA_8_3_UV - FA_8_3_noUV	Huh7	limma	0.063856189	0.400974148	FALSE	no hit	7.27566
CPSF1	Q10570	Cleavage and polyadenylation specificity factor subunit 1 OS=Homo sapiens GN=CPSF1 PE=1 SV=2	1	1	NA	1	NA	8	8	NA	2	2	NA	7	7	NA	6.87666	6.87666	NA	TRUE	FALSE	TRUE	0.271930512	25.11733966	2.066882953	0.064078841	0.400974148	-4.386397292	0.312355229	1	1	FA_8_3_UV - FA_8_3_noUV	Huh7	limma	0.064078841	0.400974148	FALSE	no hit	6.87666
PTGES3	A0A087WYT3|Q15185|Q15185-3|Q15185-4	Isoform 3 of Prostaglandin E synthase 3 OS=Homo sapiens GN=PTGES3|Isoform 4 of Prostaglandin E synthase 3 OS=Homo sapiens GN=PTGES3|Prostaglandin E synthase 3 OS=Homo sapiens GN=PTGES3 PE=1 SV=1	2	1	1	1	1	8	8	8	2	2	2	4	3	4	7.096945	7.08823	7.10566	TRUE	TRUE	TRUE	-0.580942275	24.54966673	-2.065011985	0.064283721	0.400974148	-4.389265762	0.312793455	1	1	FA_8_3_UV - FA_8_3_noUV	Huh7	limma	0.064283721	0.400974148	FALSE	no hit	7.08823
DPYSL3	Q14195-2	Isoform LCRMP-4 of Dihydropyrimidinase-related protein 3 OS=Homo sapiens GN=DPYSL3	1	1	NA	1	NA	8	8	NA	2	2	NA	5	5	NA	6.81934	6.81934	NA	TRUE	FALSE	TRUE	-0.280297205	24.56807218	-2.056739076	0.065197079	0.402849711	-4.401936914	0.314736021	1	1	FA_8_3_UV - FA_8_3_noUV	Huh7	limma	0.065197079	0.402849711	FALSE	no hit	6.81934
HEATR1	Q5T3Q7|Q9H583	HEAT repeat-containing protein 1 OS=Homo sapiens GN=HEATR1 PE=1 SV=1|HEAT repeat-containing protein 1 OS=Homo sapiens GN=HEATR1 PE=1 SV=3	1	1	NA	1	NA	8	8	NA	2	2	NA	5	5	NA	6.33457	6.33457	NA	TRUE	FALSE	TRUE	0.450506482	24.87600575	2.052140189	0.065710095	0.402849711	-4.408971943	0.31581931	1	1	FA_8_3_UV - FA_8_3_noUV	Huh7	limma	0.065710095	0.402849711	FALSE	no hit	6.33457
DIS3	Q9Y2L1	Exosome complex exonuclease RRP44 OS=Homo sapiens GN=DIS3 PE=1 SV=2	1	1	NA	1	NA	8	8	NA	2	2	NA	2	2	NA	6.386	6.386	NA	TRUE	FALSE	TRUE	-0.293707631	23.371729	-2.050310792	0.065915224	0.402849711	-4.411768653	0.316250913	1	1	FA_8_3_UV - FA_8_3_noUV	Huh7	limma	0.065915224	0.402849711	FALSE	no hit	6.386
OTUB1	F5GYJ8|F5GYN4|J3KR44|Q96FW1	Ubiquitin thioesterase OTUB1 OS=Homo sapiens GN=OTUB1 PE=1 SV=1|Ubiquitin thioesterase OTUB1 OS=Homo sapiens GN=OTUB1 PE=1 SV=1|Ubiquitin thioesterase OTUB1 OS=Homo sapiens GN=OTUB1 PE=1 SV=2|Ubiquitin thioesterase OTUB1 OS=Homo sapiens GN=OTUB1 PE=1 SV=2	2	1	1	1	1	8	8	8	2	2	2	5	4	5	6.35024	6.45124	6.24924	TRUE	TRUE	TRUE	-0.405116247	23.33824337	-2.040445881	0.067031817	0.402849711	-4.426832285	0.318584975	1	1	FA_8_3_UV - FA_8_3_noUV	Huh7	limma	0.067031817	0.402849711	FALSE	no hit	6.45124
SQRDL	Q9Y6N5	Sulfide:quinone oxidoreductase, mitochondrial OS=Homo sapiens GN=SQRDL PE=1 SV=1	2	1	1	1	1	8	8	8	2	2	2	4	4	4	6.143935	6.19221	6.09566	TRUE	TRUE	TRUE	0.230784634	23.94843896	2.038831155	0.067216274	0.402849711	-4.429295139	0.318968095	1	1	FA_8_3_UV - FA_8_3_noUV	Huh7	limma	0.067216274	0.402849711	FALSE	no hit	6.19221
NXN	Q6DKJ4	Nucleoredoxin OS=Homo sapiens GN=NXN PE=1 SV=2	1	1	NA	1	NA	8	8	NA	2	2	NA	2	2	NA	6.62028	6.62028	NA	TRUE	FALSE	TRUE	-0.40431336	23.02273296	-2.03436305	0.067729178	0.402849711	-4.43610593	0.320029796	1	1	FA_8_3_UV - FA_8_3_noUV	Huh7	limma	0.067729178	0.402849711	FALSE	no hit	6.62028
TGM3	Q08188	Protein-glutamine gamma-glutamyltransferase E OS=Homo sapiens GN=TGM3 PE=1 SV=4	2	1	1	1	1	8	8	8	2	2	2	3	2	3	6.060895	5.98691	6.13488	TRUE	TRUE	TRUE	0.694220502	22.54538211	2.030364284	0.068191327	0.402849711	-4.442196094	0.320981931	1	1	FA_8_3_UV - FA_8_3_noUV	Huh7	limma	0.068191327	0.402849711	FALSE	no hit	5.98691
NRDC	A0A087WYK8|B1AKJ5|O43847|O43847-2	Isoform 2 of Nardilysin OS=Homo sapiens GN=NRDC|Nardilysin OS=Homo sapiens GN=NRDC PE=1 SV=1|Nardilysin OS=Homo sapiens GN=NRDC PE=1 SV=2	2	1	1	1	1	8	8	8	2	2	2	20	11	20	6.696815	6.58413	6.8095	TRUE	TRUE	TRUE	-0.310109395	25.27720102	-2.027926112	0.068474567	0.402849711	-4.445907029	0.321563384	1	1	FA_8_3_UV - FA_8_3_noUV	Huh7	limma	0.068474567	0.402849711	FALSE	no hit	6.58413
PDHA1	P08559|P08559-2|P08559-3|P08559-4	Pyruvate dehydrogenase E1 component subunit alpha, somatic form, mitochondrial OS=Homo sapiens GN=PDHA1 PE=1 SV=3|Isoform 2 of Pyruvate dehydrogenase E1 component subunit alpha, somatic form, mitochondrial OS=Homo sapiens GN=PDHA1|Isoform 3 of Pyruvate dehydrogenase E1 component subunit alpha, somatic form, mitochondrial OS=Homo sapiens GN=PDHA1|Isoform 4 of Pyruvate dehydrogenase E1 component su…	2	1	1	1	1	8	8	8	2	2	2	8	8	7	7.234915	7.62495	6.84488	TRUE	TRUE	TRUE	0.2260874	25.88857428	2.027871944	0.068480873	0.402849711	-4.445989453	0.32157631	1	1	FA_8_3_UV - FA_8_3_noUV	Huh7	limma	0.068480873	0.402849711	FALSE	no hit	7.62495
IVD	A0A0A0MT83|P26440|P26440-2	Isovaleryl-CoA dehydrogenase, mitochondrial OS=Homo sapiens GN=IVD PE=1 SV=1|Isovaleryl-CoA dehydrogenase, mitochondrial OS=Homo sapiens GN=IVD PE=1 SV=1|Isoform 2 of Isovaleryl-CoA dehydrogenase, mitochondrial OS=Homo sapiens GN=IVD	1	1	NA	1	NA	8	8	NA	2	2	NA	3	3	NA	6.59669	6.59669	NA	TRUE	FALSE	TRUE	0.289585189	24.17334124	2.027312119	0.068546069	0.402849711	-4.446841245	0.321709917	1	1	FA_8_3_UV - FA_8_3_noUV	Huh7	limma	0.068546069	0.402849711	FALSE	no hit	6.59669
GSTP1	P09211	Glutathione S-transferase P OS=Homo sapiens GN=GSTP1 PE=1 SV=2	2	1	1	1	1	8	8	8	2	2	2	8	6	8	6.90196	6.90241	6.90151	TRUE	TRUE	TRUE	-0.638598128	25.19206289	-2.026164065	0.068679952	0.402849711	-4.448587744	0.321984024	1	1	FA_8_3_UV - FA_8_3_noUV	Huh7	limma	0.068679952	0.402849711	FALSE	no hit	6.90241
ACADSB	P45954|P45954-2	Short/branched chain specific acyl-CoA dehydrogenase, mitochondrial OS=Homo sapiens GN=ACADSB PE=1 SV=1|Isoform 2 of Short/branched chain specific acyl-CoA dehydrogenase, mitochondrial OS=Homo sapiens GN=ACADSB	1	1	NA	1	NA	8	8	NA	2	2	NA	4	4	NA	6.67619	6.67619	NA	TRUE	FALSE	TRUE	0.275059995	24.50480456	2.024570055	0.068866248	0.402849711	-4.45101198	0.322364859	1	1	FA_8_3_UV - FA_8_3_noUV	Huh7	limma	0.068866248	0.402849711	FALSE	no hit	6.67619
S100A10	P60903	Protein S100-A10 OS=Homo sapiens GN=S100A10 PE=1 SV=2	2	1	1	1	1	8	8	8	2	2	2	2	2	2	6.47008	6.44046	6.4997	TRUE	TRUE	TRUE	0.298790701	22.84069786	2.019068472	0.06951289	0.404536355	-4.459372922	0.323681532	1	1	FA_8_3_UV - FA_8_3_noUV	Huh7	limma	0.06951289	0.404536355	FALSE	no hit	6.44046
SFPQ	P23246	Splicing factor, proline- and glutamine-rich OS=Homo sapiens GN=SFPQ PE=1 SV=2	2	1	1	1	1	8	8	8	2	2	2	7	4	7	6.903205	7.10282	6.70359	TRUE	TRUE	TRUE	0.199967054	24.82648949	2.014018329	0.070111488	0.40592754	-4.467039428	0.324893244	1	1	FA_8_3_UV - FA_8_3_noUV	Huh7	limma	0.070111488	0.40592754	FALSE	no hit	7.10282
DNAJC3	Q13217|X6R9L0	DnaJ homolog subfamily C member 3 OS=Homo sapiens GN=DNAJC3 PE=1 SV=1	2	1	1	1	1	8	8	8	2	2	2	4	4	2	6.38005	6.469	6.2911	TRUE	TRUE	TRUE	0.299021294	24.1001326	2.007280614	0.070917654	0.40705369	-4.477255237	0.326514457	1	1	FA_8_3_UV - FA_8_3_noUV	Huh7	limma	0.070917654	0.40705369	FALSE	no hit	6.469
LASP1	Q14847	LIM and SH3 domain protein 1 OS=Homo sapiens GN=LASP1 PE=1 SV=2	2	1	1	1	1	8	8	8	2	2	2	4	3	4	6.88882	7.00721	6.77043	TRUE	TRUE	TRUE	-0.600682133	24.17818505	-2.002723664	0.071467814	0.40705369	-4.484156345	0.327613914	1	1	FA_8_3_UV - FA_8_3_noUV	Huh7	limma	0.071467814	0.40705369	FALSE	no hit	7.00721
YWHAH	Q04917	14-3-3 protein eta OS=Homo sapiens GN=YWHAH PE=1 SV=4	2	1	1	1	1	8	8	8	2	2	2	4	4	2	6.85475	7.34385	6.36565	TRUE	TRUE	TRUE	-0.373091141	24.98488383	-2.002579429	0.071485293	0.40705369	-4.484374668	0.327648752	1	1	FA_8_3_UV - FA_8_3_noUV	Huh7	limma	0.071485293	0.40705369	FALSE	no hit	7.34385
UBA1	P22314|P22314-2	Ubiquitin-like modifier-activating enzyme 1 OS=Homo sapiens GN=UBA1 PE=1 SV=3|Isoform 2 of Ubiquitin-like modifier-activating enzyme 1 OS=Homo sapiens GN=UBA1	2	1	1	1	1	8	8	8	2	2	2	24	16	24	7.583545	7.63981	7.52728	TRUE	TRUE	TRUE	-0.307398097	26.69602389	-2.000414125	0.07174817	0.40705369	-4.487651402	0.328172053	1	1	FA_8_3_UV - FA_8_3_noUV	Huh7	limma	0.07174817	0.40705369	FALSE	no hit	7.63981
NOP56	O00567	Nucleolar protein 56 OS=Homo sapiens GN=NOP56 PE=1 SV=4	1	1	NA	1	NA	8	8	NA	2	2	NA	4	4	NA	6.90427	6.90427	NA	TRUE	FALSE	TRUE	0.381309721	24.76495738	1.997242919	0.072134805	0.407200972	-4.492447634	0.328939434	1	1	FA_8_3_UV - FA_8_3_noUV	Huh7	limma	0.072134805	0.407200972	FALSE	no hit	6.90427
ARHGAP1	Q07960	Rho GTPase-activating protein 1 OS=Homo sapiens GN=ARHGAP1 PE=1 SV=1	1	1	NA	1	NA	8	8	NA	2	2	NA	5	5	NA	7.42508	7.42508	NA	TRUE	FALSE	TRUE	-0.31263425	25.05805604	-1.987805504	0.073296996	0.40870954	-4.506701809	0.33123001	1	1	FA_8_3_UV - FA_8_3_noUV	Huh7	limma	0.073296996	0.40870954	FALSE	no hit	7.42508
NAT10	A0A087WV29|Q9H0A0|Q9H0A0-2	RNA cytidine acetyltransferase OS=Homo sapiens GN=NAT10 PE=1 SV=1|RNA cytidine acetyltransferase OS=Homo sapiens GN=NAT10 PE=1 SV=2|Isoform 2 of RNA cytidine acetyltransferase OS=Homo sapiens GN=NAT10	1	1	NA	1	NA	8	8	NA	2	2	NA	10	10	NA	6.90779	6.90779	NA	TRUE	FALSE	TRUE	0.310899117	25.93784474	1.983932888	0.073778952	0.40870954	-4.512542564	0.33217292	1	1	FA_8_3_UV - FA_8_3_noUV	Huh7	limma	0.073778952	0.40870954	FALSE	no hit	6.90779
YBX1	A0A087X1S2|H0Y449|P67809	Nuclease-sensitive element-binding protein 1 OS=Homo sapiens GN=YBX1 PE=1 SV=2|Nuclease-sensitive element-binding protein 1 (Fragment) OS=Homo sapiens GN=YBX1 PE=1 SV=1|Nuclease-sensitive element-binding protein 1 OS=Homo sapiens GN=YBX1 PE=1 SV=3	2	1	1	1	1	8	8	8	2	2	2	3	3	3	6.423555	6.38934	6.45777	TRUE	TRUE	TRUE	-0.234878862	23.03290331	-1.98302966	0.073891786	0.40870954	-4.51390412	0.332393088	1	1	FA_8_3_UV - FA_8_3_noUV	Huh7	limma	0.073891786	0.40870954	FALSE	no hit	6.38934
PUS1	F5H1S9|G8JLB3|Q9Y606|Q9Y606-2	tRNA pseudouridine synthase OS=Homo sapiens GN=PUS1 PE=1 SV=1|tRNA pseudouridine synthase (Fragment) OS=Homo sapiens GN=PUS1 PE=1 SV=1|tRNA pseudouridine synthase A, mitochondrial OS=Homo sapiens GN=PUS1 PE=1 SV=3|Isoform 2 of tRNA pseudouridine synthase A, mitochondrial OS=Homo sapiens GN=PUS1	1	1	NA	1	NA	8	8	NA	2	2	NA	6	6	NA	7.17573	7.17573	NA	TRUE	FALSE	TRUE	0.231663233	25.12732082	1.980489347	0.074209997	0.40870954	-4.51773204	0.333012812	1	1	FA_8_3_UV - FA_8_3_noUV	Huh7	limma	0.074209997	0.40870954	FALSE	no hit	7.17573
PPP1CC	F8VYE8|P36873|P36873-2	Serine/threonine-protein phosphatase OS=Homo sapiens GN=PPP1CC PE=1 SV=1|Serine/threonine-protein phosphatase PP1-gamma catalytic subunit OS=Homo sapiens GN=PPP1CC PE=1 SV=1|Isoform Gamma-2 of Serine/threonine-protein phosphatase PP1-gamma catalytic subunit OS=Homo sapiens GN=PPP1CC	1	1	NA	1	NA	8	8	NA	2	2	NA	2	2	NA	7.00527	7.00527	NA	TRUE	FALSE	TRUE	0.241614461	23.49793012	1.980472629	0.074212095	0.40870954	-4.517757224	0.333016893	1	1	FA_8_3_UV - FA_8_3_noUV	Huh7	limma	0.074212095	0.40870954	FALSE	no hit	7.00527
FH	P07954|P07954-2	Fumarate hydratase, mitochondrial OS=Homo sapiens GN=FH PE=1 SV=3|Isoform Cytoplasmic of Fumarate hydratase, mitochondrial OS=Homo sapiens GN=FH	2	1	1	1	1	8	8	8	2	2	2	12	5	12	7.066025	6.88799	7.24406	TRUE	TRUE	TRUE	0.296843119	24.89258583	1.977293536	0.074612139	0.408917983	-4.522544684	0.333793508	1	1	FA_8_3_UV - FA_8_3_noUV	Huh7	limma	0.074612139	0.408917983	FALSE	no hit	6.88799
XPNPEP1	Q9NQW7|Q9NQW7-3	Isoform 3 of Xaa-Pro aminopeptidase 1 OS=Homo sapiens GN=XPNPEP1|Xaa-Pro aminopeptidase 1 OS=Homo sapiens GN=XPNPEP1 PE=1 SV=3	2	1	1	1	1	8	8	8	2	2	2	6	4	6	6.751025	6.73133	6.77072	TRUE	TRUE	TRUE	-0.378098891	24.36688288	-1.970138063	0.075519937	0.411573651	-4.53330798	0.335545776	1	1	FA_8_3_UV - FA_8_3_noUV	Huh7	limma	0.075519937	0.411573651	FALSE	no hit	6.73133
GMPS	P49915	GMP synthase [glutamine-hydrolyzing] OS=Homo sapiens GN=GMPS PE=1 SV=1	1	1	NA	1	NA	8	8	NA	2	2	NA	5	5	NA	6.80698	6.80698	NA	TRUE	FALSE	TRUE	-0.30069099	24.99544136	-1.961511077	0.076628138	0.411573651	-4.546261962	0.337666255	1	1	FA_8_3_UV - FA_8_3_noUV	Huh7	limma	0.076628138	0.411573651	FALSE	no hit	6.80698
BCCIP	Q9P287|Q9P287-2|Q9P287-3|Q9P287-4	BRCA2 and CDKN1A-interacting protein OS=Homo sapiens GN=BCCIP PE=1 SV=1|Isoform 2 of BRCA2 and CDKN1A-interacting protein OS=Homo sapiens GN=BCCIP|Isoform 3 of BRCA2 and CDKN1A-interacting protein OS=Homo sapiens GN=BCCIP|Isoform 4 of BRCA2 and CDKN1A-interacting protein OS=Homo sapiens GN=BCCIP	1	1	NA	1	NA	8	8	NA	2	2	NA	2	2	NA	6.32055	6.32055	NA	TRUE	FALSE	TRUE	-0.291752304	22.24632719	-1.959863798	0.076841462	0.411573651	-4.548732608	0.338072127	1	1	FA_8_3_UV - FA_8_3_noUV	Huh7	limma	0.076841462	0.411573651	FALSE	no hit	6.32055
THOC3	Q96J01|Q96J01-2	THO complex subunit 3 OS=Homo sapiens GN=THOC3 PE=1 SV=1|Isoform 2 of THO complex subunit 3 OS=Homo sapiens GN=THOC3	1	1	NA	1	NA	8	8	NA	2	2	NA	3	3	NA	6.51013	6.51013	NA	TRUE	FALSE	TRUE	0.200193849	24.13058982	1.958981699	0.076955922	0.411573651	-4.550055233	0.338289595	1	1	FA_8_3_UV - FA_8_3_noUV	Huh7	limma	0.076955922	0.411573651	FALSE	no hit	6.51013
CS	A0A0C4DGI3|B4DJV2|O75390	Citrate synthase OS=Homo sapiens GN=CS PE=1 SV=1|Citrate synthase, mitochondrial OS=Homo sapiens GN=CS PE=1 SV=2	2	1	1	1	1	8	8	8	2	2	2	7	7	4	7.24266	7.54414	6.94118	TRUE	TRUE	TRUE	0.251934767	25.55567249	1.950208189	0.078103045	0.411573651	-4.563195884	0.340457462	1	1	FA_8_3_UV - FA_8_3_noUV	Huh7	limma	0.078103045	0.411573651	FALSE	no hit	7.54414
EIF1AY|EIF1AX	O14602|P47813	Eukaryotic translation initiation factor 1A, Y-chromosomal OS=Homo sapiens GN=EIF1AY PE=1 SV=4|Eukaryotic translation initiation factor 1A, X-chromosomal OS=Homo sapiens GN=EIF1AX PE=1 SV=2	1	1	NA	1	NA	8	8	NA	2	2	NA	3	3	NA	6.62649	6.62649	NA	TRUE	FALSE	TRUE	-0.301845317	23.96818073	-1.940547881	0.079384532	0.411573651	-4.577634227	0.342854721	1	1	FA_8_3_UV - FA_8_3_noUV	Huh7	limma	0.079384532	0.411573651	FALSE	no hit	6.62649
CLIC1	O00299	Chloride intracellular channel protein 1 OS=Homo sapiens GN=CLIC1 PE=1 SV=4	2	1	1	1	1	8	8	8	2	2	2	12	7	12	7.55657	7.52823	7.58491	TRUE	TRUE	TRUE	-0.39583859	25.67060636	-1.932173014	0.080511305	0.411573651	-4.590125169	0.344941699	1	1	FA_8_3_UV - FA_8_3_noUV	Huh7	limma	0.080511305	0.411573651	FALSE	no hit	7.52823
DARS2	Q6PI48	Aspartate--tRNA ligase, mitochondrial OS=Homo sapiens GN=DARS2 PE=1 SV=1	1	1	NA	1	NA	8	8	NA	2	2	NA	2	2	NA	6.98898	6.98898	NA	TRUE	FALSE	TRUE	0.228456546	23.67859763	1.930892847	0.080684847	0.411573651	-4.592032353	0.345261423	1	1	FA_8_3_UV - FA_8_3_noUV	Huh7	limma	0.080684847	0.411573651	FALSE	no hit	6.98898
PLOD1	Q02809|Q02809-2	Procollagen-lysine,2-oxoglutarate 5-dioxygenase 1 OS=Homo sapiens GN=PLOD1 PE=1 SV=2|Isoform 2 of Procollagen-lysine,2-oxoglutarate 5-dioxygenase 1 OS=Homo sapiens GN=PLOD1	1	1	NA	1	NA	8	8	NA	2	2	NA	5	5	NA	6.74581	6.74581	NA	TRUE	FALSE	TRUE	0.282766883	24.57823708	1.930109915	0.080791153	0.411573651	-4.593198477	0.345457055	1	1	FA_8_3_UV - FA_8_3_noUV	Huh7	limma	0.080791153	0.411573651	FALSE	no hit	6.74581
SYNE1	A0A0C4DG40|Q8NF91|Q8NF91-4	Nesprin-1 OS=Homo sapiens GN=SYNE1 PE=1 SV=1|Nesprin-1 OS=Homo sapiens GN=SYNE1 PE=1 SV=4|Isoform 4 of Nesprin-1 OS=Homo sapiens GN=SYNE1	1	1	NA	1	NA	8	8	NA	2	2	NA	3	3	NA	5.70803	5.70803	NA	TRUE	FALSE	TRUE	0.212972685	23.07911272	1.928063088	0.081069686	0.411573651	-4.596246067	0.345968832	1	1	FA_8_3_UV - FA_8_3_noUV	Huh7	limma	0.081069686	0.411573651	FALSE	no hit	5.70803
EEF1B2	P24534	Elongation factor 1-beta OS=Homo sapiens GN=EEF1B2 PE=1 SV=3	2	1	1	1	1	8	8	8	2	2	2	7	6	7	7.113955	7.52526	6.70265	TRUE	TRUE	TRUE	-0.453248566	25.50556412	-1.926474121	0.081286529	0.411573651	-4.598610917	0.34636646	1	1	FA_8_3_UV - FA_8_3_noUV	Huh7	limma	0.081286529	0.411573651	FALSE	no hit	7.52526
ARCN1	B0YIW6|P48444	Archain 1, isoform CRA_a OS=Homo sapiens GN=ARCN1 PE=1 SV=1|Coatomer subunit delta OS=Homo sapiens GN=ARCN1 PE=1 SV=1	1	1	NA	1	NA	8	8	NA	2	2	NA	3	3	NA	6.66022	6.66022	NA	TRUE	FALSE	TRUE	-0.220904716	23.45877525	-1.921967095	0.081904526	0.411573651	-4.605313845	0.347495896	1	1	FA_8_3_UV - FA_8_3_noUV	Huh7	limma	0.081904526	0.411573651	FALSE	no hit	6.66022
STRBP	Q96SI9|Q96SI9-2	Spermatid perinuclear RNA-binding protein OS=Homo sapiens GN=STRBP PE=1 SV=1|Isoform 2 of Spermatid perinuclear RNA-binding protein OS=Homo sapiens GN=STRBP	1	1	NA	1	NA	8	8	NA	2	2	NA	2	2	NA	6.33537	6.33537	NA	TRUE	FALSE	TRUE	0.269041407	24.41152147	1.920021532	0.082172644	0.411573651	-4.608205096	0.347984167	1	1	FA_8_3_UV - FA_8_3_noUV	Huh7	limma	0.082172644	0.411573651	FALSE	no hit	6.33537
ELAC2	G5E9D5|Q9BQ52|Q9BQ52-4	ElaC homolog 2 (E. coli), isoform CRA_a OS=Homo sapiens GN=ELAC2 PE=1 SV=1|Zinc phosphodiesterase ELAC protein 2 OS=Homo sapiens GN=ELAC2 PE=1 SV=2|Isoform 4 of Zinc phosphodiesterase ELAC protein 2 OS=Homo sapiens GN=ELAC2	1	1	NA	1	NA	8	8	NA	2	2	NA	2	2	NA	6.3685	6.3685	NA	TRUE	FALSE	TRUE	0.280032705	23.23468733	1.917136508	0.082571729	0.411573651	-4.612489979	0.348709013	1	1	FA_8_3_UV - FA_8_3_noUV	Huh7	limma	0.082571729	0.411573651	FALSE	no hit	6.3685
CPOX	P36551	Oxygen-dependent coproporphyrinogen-III oxidase, mitochondrial OS=Homo sapiens GN=CPOX PE=1 SV=3	1	1	NA	1	NA	8	8	NA	2	2	NA	4	4	NA	6.3452	6.3452	NA	TRUE	FALSE	TRUE	0.244253776	24.34865112	1.917026746	0.082586948	0.411573651	-4.612652942	0.348736609	1	1	FA_8_3_UV - FA_8_3_noUV	Huh7	limma	0.082586948	0.411573651	FALSE	no hit	6.3452
PYCR1	J3QKT4|P32322|P32322-2|P32322-3	Pyrroline-5-carboxylate reductase (Fragment) OS=Homo sapiens GN=PYCR1 PE=1 SV=1|Pyrroline-5-carboxylate reductase 1, mitochondrial OS=Homo sapiens GN=PYCR1 PE=1 SV=2|Isoform 2 of Pyrroline-5-carboxylate reductase 1, mitochondrial OS=Homo sapiens GN=PYCR1|Isoform 3 of Pyrroline-5-carboxylate reductase 1, mitochondrial OS=Homo sapiens GN=PYCR1	1	1	NA	1	NA	8	8	NA	2	2	NA	2	2	NA	6.22414	6.22414	NA	TRUE	FALSE	TRUE	0.26318616	22.73199066	1.91509861	0.082854714	0.411573651	-4.615514908	0.349221601	1	1	FA_8_3_UV - FA_8_3_noUV	Huh7	limma	0.082854714	0.411573651	FALSE	no hit	6.22414
SSB	P05455	Lupus La protein OS=Homo sapiens GN=SSB PE=1 SV=2	2	1	1	1	1	8	8	8	2	2	2	12	7	12	7.195455	7.26889	7.12202	TRUE	TRUE	TRUE	-0.435706345	25.07706026	-1.914765839	0.082901009	0.411573651	-4.616008712	0.349305348	1	1	FA_8_3_UV - FA_8_3_noUV	Huh7	limma	0.082901009	0.411573651	FALSE	no hit	7.26889
PFN1	P07737	Profilin-1 OS=Homo sapiens GN=PFN1 PE=1 SV=2	1	1	NA	1	NA	8	8	NA	2	2	NA	5	5	NA	7.47947	7.47947	NA	TRUE	FALSE	TRUE	-0.469984479	25.24771612	-1.913323207	0.083101982	0.411573651	-4.618148995	0.349668554	1	1	FA_8_3_UV - FA_8_3_noUV	Huh7	limma	0.083101982	0.411573651	FALSE	no hit	7.47947
TPM3	J3KN67|P06753-2|P06753-5|P06753-6	Isoform 2 of Tropomyosin alpha-3 chain OS=Homo sapiens GN=TPM3|Isoform 5 of Tropomyosin alpha-3 chain OS=Homo sapiens GN=TPM3|Isoform 6 of Tropomyosin alpha-3 chain OS=Homo sapiens GN=TPM3|Tropomyosin alpha-3 chain OS=Homo sapiens GN=TPM3 PE=1 SV=1	2	1	1	1	1	8	8	8	2	2	2	15	10	15	7.747595	7.66832	7.82687	TRUE	TRUE	TRUE	-0.43857413	25.43708417	-1.912551085	0.083209732	0.411573651	-4.619294207	0.349863047	1	1	FA_8_3_UV - FA_8_3_noUV	Huh7	limma	0.083209732	0.411573651	FALSE	no hit	7.66832
COQ9	H3BNT2|H3BPY0|O75208	Ubiquinone biosynthesis protein COQ9, mitochondrial (Fragment) OS=Homo sapiens GN=COQ9 PE=1 SV=7|Ubiquinone biosynthesis protein COQ9, mitochondrial (Fragment) OS=Homo sapiens GN=COQ9 PE=1 SV=1|Ubiquinone biosynthesis protein COQ9, mitochondrial OS=Homo sapiens GN=COQ9 PE=1 SV=1	1	1	NA	1	NA	8	8	NA	2	2	NA	2	2	NA	6.94541	6.94541	NA	TRUE	FALSE	TRUE	0.216404027	24.24629733	1.911046922	0.083420011	0.411573651	-4.621524567	0.350242134	1	1	FA_8_3_UV - FA_8_3_noUV	Huh7	limma	0.083420011	0.411573651	FALSE	no hit	6.94541
ANXA1	P04083	Annexin A1 OS=Homo sapiens GN=ANXA1 PE=1 SV=2	2	1	1	1	1	8	8	8	2	2	2	8	8	8	6.904825	7.05651	6.75314	TRUE	TRUE	TRUE	-0.425898979	25.09406498	-1.909361137	0.083656265	0.411573651	-4.624023267	0.350667304	1	1	FA_8_3_UV - FA_8_3_noUV	Huh7	limma	0.083656265	0.411573651	FALSE	no hit	7.05651
DAP3	P51398|P51398-2|P51398-3	28S ribosomal protein S29, mitochondrial OS=Homo sapiens GN=DAP3 PE=1 SV=1|Isoform 2 of 28S ribosomal protein S29, mitochondrial OS=Homo sapiens GN=DAP3|Isoform 3 of 28S ribosomal protein S29, mitochondrial OS=Homo sapiens GN=DAP3	1	1	NA	1	NA	8	8	NA	2	2	NA	3	3	NA	6.2968	6.2968	NA	TRUE	FALSE	TRUE	0.44748198	23.70732933	1.908626137	0.083759465	0.411573651	-4.625112377	0.35085278	1	1	FA_8_3_UV - FA_8_3_noUV	Huh7	limma	0.083759465	0.411573651	FALSE	no hit	6.2968
MAP1B	P46821	Microtubule-associated protein 1B OS=Homo sapiens GN=MAP1B PE=1 SV=2	1	1	NA	1	NA	8	8	NA	2	2	NA	11	11	NA	6.99663	6.99663	NA	TRUE	FALSE	TRUE	-0.599251904	25.86366292	-1.907402099	0.083931593	0.411573651	-4.626925702	0.351161801	1	1	FA_8_3_UV - FA_8_3_noUV	Huh7	limma	0.083931593	0.411573651	FALSE	no hit	6.99663
SUPV3L1	Q8IYB8	ATP-dependent RNA helicase SUPV3L1, mitochondrial OS=Homo sapiens GN=SUPV3L1 PE=1 SV=1	1	1	NA	1	NA	8	8	NA	2	2	NA	6	6	NA	6.36931	6.36931	NA	TRUE	FALSE	TRUE	0.410808795	24.46136917	1.905604798	0.084184929	0.411573651	-4.629587297	0.351615862	1	1	FA_8_3_UV - FA_8_3_noUV	Huh7	limma	0.084184929	0.411573651	FALSE	no hit	6.36931
MSN	P26038	Moesin OS=Homo sapiens GN=MSN PE=1 SV=3	2	1	1	1	1	8	8	8	2	2	2	15	6	15	7.268665	6.9897	7.54763	TRUE	TRUE	TRUE	-0.222946787	24.93857108	-1.903666763	0.084458895	0.411573651	-4.632455993	0.352105893	1	1	FA_8_3_UV - FA_8_3_noUV	Huh7	limma	0.084458895	0.411573651	FALSE	no hit	6.9897
ALDH3A2	J3QRD1|P51648|P51648-2	Fatty aldehyde dehydrogenase OS=Homo sapiens GN=ALDH3A2 PE=1 SV=1|Fatty aldehyde dehydrogenase OS=Homo sapiens GN=ALDH3A2 PE=1 SV=1|Isoform 2 of Fatty aldehyde dehydrogenase OS=Homo sapiens GN=ALDH3A2	1	1	NA	1	NA	8	8	NA	2	2	NA	4	4	NA	6.387	6.387	NA	TRUE	FALSE	TRUE	0.326915224	23.62345831	1.902847739	0.084574922	0.411573651	-4.633667908	0.352313113	1	1	FA_8_3_UV - FA_8_3_noUV	Huh7	limma	0.084574922	0.411573651	FALSE	no hit	6.387
PRKCSH	K7ELL7|P14314|P14314-2	Glucosidase 2 subunit beta OS=Homo sapiens GN=PRKCSH PE=1 SV=1|Glucosidase 2 subunit beta OS=Homo sapiens GN=PRKCSH PE=1 SV=2|Isoform 2 of Glucosidase 2 subunit beta OS=Homo sapiens GN=PRKCSH	2	1	1	1	1	8	8	8	2	2	2	11	5	11	7.546345	7.48052	7.61217	TRUE	TRUE	TRUE	-0.780585506	25.29129407	-1.899164642	0.085098516	0.412344314	-4.639114808	0.35324592	1	1	FA_8_3_UV - FA_8_3_noUV	Huh7	limma	0.085098516	0.412344314	FALSE	no hit	7.48052
SAE1	Q9UBE0	SUMO-activating enzyme subunit 1 OS=Homo sapiens GN=SAE1 PE=1 SV=1	1	1	NA	1	NA	8	8	NA	2	2	NA	2	2	NA	6.31969	6.31969	NA	TRUE	FALSE	TRUE	-0.435528005	23.64811953	-1.895415131	0.085634632	0.413168804	-4.644654846	0.354197151	1	1	FA_8_3_UV - FA_8_3_noUV	Huh7	limma	0.085634632	0.413168804	FALSE	no hit	6.31969
DNAJC7	Q99615	DnaJ homolog subfamily C member 7 OS=Homo sapiens GN=DNAJC7 PE=1 SV=2	1	1	NA	1	NA	8	8	NA	2	2	NA	3	3	NA	6.32575	6.32575	NA	TRUE	FALSE	TRUE	-0.260305755	23.67294842	-1.885331541	0.087091948	0.414302565	-4.659528119	0.356763321	1	1	FA_8_3_UV - FA_8_3_noUV	Huh7	limma	0.087091948	0.414302565	FALSE	no hit	6.32575
MALT1	Q9UDY8|Q9UDY8-2	Mucosa-associated lymphoid tissue lymphoma translocation protein 1 OS=Homo sapiens GN=MALT1 PE=1 SV=1|Isoform 2 of Mucosa-associated lymphoid tissue lymphoma translocation protein 1 OS=Homo sapiens GN=MALT1	1	1	NA	1	NA	8	8	NA	2	2	NA	11	11	NA	7.28348	7.28348	NA	TRUE	FALSE	TRUE	-0.334065002	25.83548996	-1.88169039	0.087623786	0.414302565	-4.664889575	0.357692828	1	1	FA_8_3_UV - FA_8_3_noUV	Huh7	limma	0.087623786	0.414302565	FALSE	no hit	7.28348
HDLBP	A0A024R4E5|Q00341	High density lipoprotein binding protein (Vigilin), isoform CRA_a OS=Homo sapiens GN=HDLBP PE=1 SV=1|Vigilin OS=Homo sapiens GN=HDLBP PE=1 SV=2	1	1	NA	1	NA	8	8	NA	2	2	NA	10	10	NA	6.91713	6.91713	NA	TRUE	FALSE	TRUE	-0.210927637	25.29473527	-1.881271627	0.087685144	0.414302565	-4.665505872	0.357799827	1	1	FA_8_3_UV - FA_8_3_noUV	Huh7	limma	0.087685144	0.414302565	FALSE	no hit	6.91713
CAP1	Q01518|Q01518-2	Adenylyl cyclase-associated protein 1 OS=Homo sapiens GN=CAP1 PE=1 SV=5|Isoform 2 of Adenylyl cyclase-associated protein 1 OS=Homo sapiens GN=CAP1	2	1	1	1	1	8	8	8	2	2	2	22	3	22	7.34693	6.74683	7.94703	TRUE	TRUE	TRUE	-0.312296798	24.37894752	-1.877418312	0.088251603	0.414302565	-4.671173756	0.358785338	1	1	FA_8_3_UV - FA_8_3_noUV	Huh7	limma	0.088251603	0.414302565	FALSE	no hit	6.74683
ETF1	B7Z7P8|P62495|P62495-2	Eukaryotic peptide chain release factor subunit 1 OS=Homo sapiens GN=ETF1 PE=1 SV=1|Eukaryotic peptide chain release factor subunit 1 OS=Homo sapiens GN=ETF1 PE=1 SV=3|Isoform 2 of Eukaryotic peptide chain release factor subunit 1 OS=Homo sapiens GN=ETF1	1	1	NA	1	NA	8	8	NA	2	2	NA	4	4	NA	6.34684	6.34684	NA	TRUE	FALSE	TRUE	-0.279421241	24.41564832	-1.875704183	0.088504673	0.414302565	-4.673693304	0.359224286	1	1	FA_8_3_UV - FA_8_3_noUV	Huh7	limma	0.088504673	0.414302565	FALSE	no hit	6.34684
PSMA3	P25788|P25788-2	Proteasome subunit alpha type-3 OS=Homo sapiens GN=PSMA3 PE=1 SV=2|Isoform 2 of Proteasome subunit alpha type-3 OS=Homo sapiens GN=PSMA3	2	1	1	1	1	8	8	8	2	2	2	9	6	9	7.25452	7.42743	7.08161	TRUE	TRUE	TRUE	-0.273426283	25.21182799	-1.875077304	0.088597391	0.414302565	-4.674614462	0.3593849	1	1	FA_8_3_UV - FA_8_3_noUV	Huh7	limma	0.088597391	0.414302565	FALSE	no hit	7.42743
IPO7	O95373	Importin-7 OS=Homo sapiens GN=IPO7 PE=1 SV=1	2	1	1	1	1	8	8	8	2	2	2	17	17	4	6.94974	7.62777	6.27171	TRUE	TRUE	TRUE	-0.210643731	26.7927866	-1.873882389	0.088774372	0.414302565	-4.676369901	0.359691175	1	1	FA_8_3_UV - FA_8_3_noUV	Huh7	limma	0.088774372	0.414302565	FALSE	no hit	7.62777
BYSL	Q13895	Bystin OS=Homo sapiens GN=BYSL PE=1 SV=3	1	1	NA	1	NA	8	8	NA	2	2	NA	2	2	NA	5.81904	5.81904	NA	TRUE	FALSE	TRUE	0.248930979	21.97720108	1.873673578	0.088805333	0.414302565	-4.676676608	0.359744713	1	1	FA_8_3_UV - FA_8_3_noUV	Huh7	limma	0.088805333	0.414302565	FALSE	no hit	5.81904
ENOPH1	A0A087WTH0|Q9UHY7	Enolase-phosphatase E1 OS=Homo sapiens GN=ENOPH1 PE=1 SV=1|Enolase-phosphatase E1 OS=Homo sapiens GN=ENOPH1 PE=1 SV=2	2	1	1	1	1	8	8	8	2	2	2	3	2	3	6.270315	6.14986	6.39077	TRUE	TRUE	TRUE	-0.336813261	23.14654759	-1.866299122	0.089905165	0.414554244	-4.687497886	0.361638703	1	1	FA_8_3_UV - FA_8_3_noUV	Huh7	limma	0.089905165	0.414554244	FALSE	no hit	6.14986
TNKS1BP1	Q9C0C2	182 kDa tankyrase-1-binding protein OS=Homo sapiens GN=TNKS1BP1 PE=1 SV=4	1	1	NA	1	NA	8	8	NA	2	2	NA	3	3	NA	6.42828	6.42828	NA	TRUE	FALSE	TRUE	-0.203787692	24.15451511	-1.866245127	0.089913264	0.414554244	-4.687577042	0.361652594	1	1	FA_8_3_UV - FA_8_3_noUV	Huh7	limma	0.089913264	0.414554244	FALSE	no hit	6.42828
PFAS	O15067	Phosphoribosylformylglycinamidine synthase OS=Homo sapiens GN=PFAS PE=1 SV=4	2	1	1	1	1	8	8	8	2	2	2	10	10	2	6.676815	7.31062	6.04301	TRUE	TRUE	TRUE	-0.337751345	25.76282623	-1.865928021	0.089960841	0.414554244	-4.688041897	0.361734178	1	1	FA_8_3_UV - FA_8_3_noUV	Huh7	limma	0.089960841	0.414554244	FALSE	no hit	7.31062
EEA1	Q15075	Early endosome antigen 1 OS=Homo sapiens GN=EEA1 PE=1 SV=2	2	1	1	1	1	8	8	8	2	2	2	18	18	5	6.322135	6.87137	5.7729	TRUE	TRUE	TRUE	0.17988098	26.68827793	1.859928503	0.090865373	0.416888507	-4.696829554	0.363279899	1	1	FA_8_3_UV - FA_8_3_noUV	Huh7	limma	0.090865373	0.416888507	FALSE	no hit	6.87137
HOGA1	Q86XE5	4-hydroxy-2-oxoglutarate aldolase, mitochondrial OS=Homo sapiens GN=HOGA1 PE=1 SV=1	1	1	NA	1	NA	8	8	NA	2	2	NA	3	3	NA	6.25463	6.25463	NA	TRUE	FALSE	TRUE	0.318003155	22.99081607	1.857684112	0.0912059	0.416888507	-4.700113451	0.363859207	1	1	FA_8_3_UV - FA_8_3_noUV	Huh7	limma	0.0912059	0.416888507	FALSE	no hit	6.25463
CUL1	A0A0C4DGX4|Q13616	Cullin-1 OS=Homo sapiens GN=CUL1 PE=1 SV=1|Cullin-1 OS=Homo sapiens GN=CUL1 PE=1 SV=2	1	1	NA	1	NA	8	8	NA	2	2	NA	3	3	NA	6.33772	6.33772	NA	TRUE	FALSE	TRUE	-0.187844572	24.14708646	-1.854356862	0.091712885	0.417515511	-4.704978193	0.364719077	1	1	FA_8_3_UV - FA_8_3_noUV	Huh7	limma	0.091712885	0.417515511	FALSE	no hit	6.33772
EIF4E	D6RBW1|P06730|P06730-2|P06730-3	Eukaryotic translation initiation factor 4E OS=Homo sapiens GN=EIF4E PE=1 SV=1|Eukaryotic translation initiation factor 4E OS=Homo sapiens GN=EIF4E PE=1 SV=2|Isoform 2 of Eukaryotic translation initiation factor 4E OS=Homo sapiens GN=EIF4E|Isoform 3 of Eukaryotic translation initiation factor 4E OS=Homo sapiens GN=EIF4E	2	1	1	1	1	8	8	8	2	2	2	3	3	2	6.401085	6.76676	6.03541	TRUE	TRUE	TRUE	-0.209505457	23.66337277	-1.849569053	0.092446969	0.41835326	-4.711970939	0.365958629	1	1	FA_8_3_UV - FA_8_3_noUV	Huh7	limma	0.092446969	0.41835326	FALSE	no hit	6.76676
CLYBL	Q8N0X4	Citrate lyase subunit beta-like protein, mitochondrial OS=Homo sapiens GN=CLYBL PE=1 SV=2	1	1	NA	1	NA	8	8	NA	2	2	NA	3	3	NA	6.87996	6.87996	NA	TRUE	FALSE	TRUE	0.269921052	24.39323384	1.848328774	0.092638011	0.41835326	-4.713780965	0.366280163	1	1	FA_8_3_UV - FA_8_3_noUV	Huh7	limma	0.092638011	0.41835326	FALSE	no hit	6.87996
PRDX6	P30041	Peroxiredoxin-6 OS=Homo sapiens GN=PRDX6 PE=1 SV=3	2	1	1	1	1	8	8	8	2	2	2	8	6	8	6.96949	7.11625	6.82273	TRUE	TRUE	TRUE	-0.778226623	25.4725995	-1.84090457	0.093789182	0.419105538	-4.724603156	0.368208517	1	1	FA_8_3_UV - FA_8_3_noUV	Huh7	limma	0.093789182	0.419105538	FALSE	no hit	7.11625
PMPCB	G3V0E4|O75439	Mitochondrial-processing peptidase subunit beta OS=Homo sapiens GN=PMPCB PE=1 SV=1|Mitochondrial-processing peptidase subunit beta OS=Homo sapiens GN=PMPCB PE=1 SV=2	2	1	1	1	1	8	8	8	2	2	2	5	5	3	6.64105	7.27492	6.00718	TRUE	TRUE	TRUE	0.186181822	24.78102832	1.83709224	0.094385399	0.419105538	-4.730152012	0.369201179	1	1	FA_8_3_UV - FA_8_3_noUV	Huh7	limma	0.094385399	0.419105538	FALSE	no hit	7.27492
CLTB	P09497-2	Isoform Non-brain of Clathrin light chain B OS=Homo sapiens GN=CLTB	1	1	NA	1	NA	8	8	NA	2	2	NA	3	3	NA	6.63076	6.63076	NA	TRUE	FALSE	TRUE	-0.374057972	24.32011388	-1.826278135	0.096095603	0.419105538	-4.745860917	0.37202602	1	1	FA_8_3_UV - FA_8_3_noUV	Huh7	limma	0.096095603	0.419105538	FALSE	no hit	6.63076
THOC1	A0A087WWS1|Q96FV9	THO complex subunit 1 OS=Homo sapiens GN=THOC1 PE=1 SV=1|THO complex subunit 1 OS=Homo sapiens GN=THOC1 PE=1 SV=1	1	1	NA	1	NA	8	8	NA	2	2	NA	3	3	NA	6.51493	6.51493	NA	TRUE	FALSE	TRUE	0.337578015	24.51685907	1.821365808	0.096881806	0.419105538	-4.752981437	0.373313623	1	1	FA_8_3_UV - FA_8_3_noUV	Huh7	limma	0.096881806	0.419105538	FALSE	no hit	6.51493
AHCY	P23526	Adenosylhomocysteinase OS=Homo sapiens GN=AHCY PE=1 SV=4	2	1	1	1	1	8	8	8	2	2	2	9	9	7	6.96116	7.26123	6.66109	TRUE	TRUE	TRUE	-0.275566933	26.02569742	-1.81992727	0.097113151	0.419105538	-4.755064808	0.373691209	1	1	FA_8_3_UV - FA_8_3_noUV	Huh7	limma	0.097113151	0.419105538	FALSE	no hit	7.26123
HDGF	P51858|P51858-2|P51858-3	Hepatoma-derived growth factor OS=Homo sapiens GN=HDGF PE=1 SV=1|Isoform 2 of Hepatoma-derived growth factor OS=Homo sapiens GN=HDGF|Isoform 3 of Hepatoma-derived growth factor OS=Homo sapiens GN=HDGF	2	1	1	1	1	8	8	8	2	2	2	8	3	8	6.74826	6.67621	6.82031	TRUE	TRUE	TRUE	-0.385119806	24.150854	-1.819570486	0.097170608	0.419105538	-4.755581394	0.373784894	1	1	FA_8_3_UV - FA_8_3_noUV	Huh7	limma	0.097170608	0.419105538	FALSE	no hit	6.67621
PPID	Q08752	Peptidyl-prolyl cis-trans isomerase D OS=Homo sapiens GN=PPID PE=1 SV=3	1	1	NA	1	NA	8	8	NA	2	2	NA	2	2	NA	6.64466	6.64466	NA	TRUE	FALSE	TRUE	-0.395324057	24.06294113	-1.817078431	0.097572795	0.419105538	-4.759188219	0.374439668	1	1	FA_8_3_UV - FA_8_3_noUV	Huh7	limma	0.097572795	0.419105538	FALSE	no hit	6.64466
AARS	P49588	Alanine--tRNA ligase, cytoplasmic OS=Homo sapiens GN=AARS PE=1 SV=2	2	1	1	1	1	8	8	8	2	2	2	12	12	11	7.24792	7.32904	7.1668	TRUE	TRUE	TRUE	-0.652922894	25.88023515	-1.814795701	0.097942535	0.419105538	-4.762489896	0.375040065	1	1	FA_8_3_UV - FA_8_3_noUV	Huh7	limma	0.097942535	0.419105538	FALSE	no hit	7.32904
MRPL38	Q96DV4	39S ribosomal protein L38, mitochondrial OS=Homo sapiens GN=MRPL38 PE=1 SV=2	1	1	NA	1	NA	8	8	NA	2	2	NA	2	2	NA	6.66471	6.66471	NA	TRUE	FALSE	TRUE	0.329476194	23.08103121	1.813960564	0.098078124	0.419105538	-4.763697294	0.375259868	1	1	FA_8_3_UV - FA_8_3_noUV	Huh7	limma	0.098078124	0.419105538	FALSE	no hit	6.66471
DHX9	Q08211	ATP-dependent RNA helicase A OS=Homo sapiens GN=DHX9 PE=1 SV=4	2	1	1	1	1	8	8	8	2	2	2	24	24	20	7.507345	7.88451	7.13018	TRUE	TRUE	TRUE	0.360589071	26.99810337	1.809270315	0.098842808	0.419105538	-4.770472993	0.376495796	1	1	FA_8_3_UV - FA_8_3_noUV	Huh7	limma	0.098842808	0.419105538	FALSE	no hit	7.88451
PSMC1	P62191|P62191-2	26S protease regulatory subunit 4 OS=Homo sapiens GN=PSMC1 PE=1 SV=1|Isoform 2 of 26S protease regulatory subunit 4 OS=Homo sapiens GN=PSMC1	1	1	NA	1	NA	8	8	NA	2	2	NA	3	3	NA	6.24095	6.24095	NA	TRUE	FALSE	TRUE	-0.212739194	23.2575344	-1.808837999	0.098913564	0.419105538	-4.771097086	0.376609842	1	1	FA_8_3_UV - FA_8_3_noUV	Huh7	limma	0.098913564	0.419105538	FALSE	no hit	6.24095
THOC2	Q8NI27	THO complex subunit 2 OS=Homo sapiens GN=THOC2 PE=1 SV=2	1	1	NA	1	NA	8	8	NA	2	2	NA	3	3	NA	6.33547	6.33547	NA	TRUE	FALSE	TRUE	0.312131997	23.42423519	1.806312637	0.099327815	0.419105538	-4.774741192	0.377276463	1	1	FA_8_3_UV - FA_8_3_noUV	Huh7	limma	0.099327815	0.419105538	FALSE	no hit	6.33547
PPP2R1A	P30153	Serine/threonine-protein phosphatase 2A 65 kDa regulatory subunit A alpha isoform OS=Homo sapiens GN=PPP2R1A PE=1 SV=4	2	1	1	1	1	8	8	8	2	2	2	7	7	3	6.87025	7.58838	6.15212	TRUE	TRUE	TRUE	-0.209852965	25.98107385	-1.803527721	0.099786478	0.419105538	-4.77875684	0.378012442	1	1	FA_8_3_UV - FA_8_3_noUV	Huh7	limma	0.099786478	0.419105538	FALSE	no hit	7.58838
MARS2	Q96GW9	Methionine--tRNA ligase, mitochondrial OS=Homo sapiens GN=MARS2 PE=1 SV=2	1	1	NA	1	NA	8	8	NA	2	2	NA	2	2	NA	6.85674	6.85674	NA	TRUE	FALSE	TRUE	0.231989531	23.23500873	1.803073893	0.099861405	0.419105538	-4.779410927	0.378132461	1	1	FA_8_3_UV - FA_8_3_noUV	Huh7	limma	0.099861405	0.419105538	FALSE	no hit	6.85674
EIF3M	Q7L2H7	Eukaryotic translation initiation factor 3 subunit M OS=Homo sapiens GN=EIF3M PE=1 SV=1	1	1	NA	1	NA	8	8	NA	2	2	NA	3	3	NA	5.85076	5.85076	NA	TRUE	FALSE	TRUE	-0.2689846	23.6765552	-1.802908566	0.099888713	0.419105538	-4.779649188	0.378176189	1	1	FA_8_3_UV - FA_8_3_noUV	Huh7	limma	0.099888713	0.419105538	FALSE	no hit	5.85076
PICALM	Q13492|Q13492-2|Q13492-3|Q13492-4|Q13492-5	Phosphatidylinositol-binding clathrin assembly protein OS=Homo sapiens GN=PICALM PE=1 SV=2|Isoform 2 of Phosphatidylinositol-binding clathrin assembly protein OS=Homo sapiens GN=PICALM|Isoform 3 of Phosphatidylinositol-binding clathrin assembly protein OS=Homo sapiens GN=PICALM|Isoform 4 of Phosphatidylinositol-binding clathrin assembly protein OS=Homo sapiens GN=PICALM|Isoform 5 of Phosphatidyli…	1	1	NA	1	NA	8	8	NA	2	2	NA	2	2	NA	6.39784	6.39784	NA	TRUE	FALSE	TRUE	-0.181112554	23.6798606	-1.801752813	0.100079806	0.419105538	-4.781314484	0.378481964	1	1	FA_8_3_UV - FA_8_3_noUV	Huh7	limma	0.100079806	0.419105538	FALSE	no hit	6.39784
SGTA	O43765	Small glutamine-rich tetratricopeptide repeat-containing protein alpha OS=Homo sapiens GN=SGTA PE=1 SV=1	2	1	1	1	1	8	8	8	2	2	2	5	5	3	6.27656	6.74974	5.80338	TRUE	TRUE	TRUE	-0.381366703	24.24697168	-1.797153287	0.100843606	0.419105538	-4.787936427	0.379700361	1	1	FA_8_3_UV - FA_8_3_noUV	Huh7	limma	0.100843606	0.419105538	FALSE	no hit	6.74974
HSPB1	P04792	Heat shock protein beta-1 OS=Homo sapiens GN=HSPB1 PE=1 SV=2	2	1	1	1	1	8	8	8	2	2	2	10	8	10	7.3247	7.6371	7.0123	TRUE	TRUE	TRUE	-0.521428287	25.3823371	-1.796312178	0.100983855	0.419105538	-4.789146437	0.379923428	1	1	FA_8_3_UV - FA_8_3_noUV	Huh7	limma	0.100983855	0.419105538	FALSE	no hit	7.6371
ENO1	P06733	Alpha-enolase OS=Homo sapiens GN=ENO1 PE=1 SV=2	2	1	1	1	1	8	8	8	2	2	2	20	12	20	7.892865	8.05212	7.73361	TRUE	TRUE	TRUE	-0.363317988	26.39436188	-1.7958482	0.101061296	0.419105538	-4.789813786	0.380046512	1	1	FA_8_3_UV - FA_8_3_noUV	Huh7	limma	0.101061296	0.419105538	FALSE	no hit	8.05212
RARS	P54136	Arginine--tRNA ligase, cytoplasmic OS=Homo sapiens GN=RARS PE=1 SV=2	1	1	NA	1	NA	8	8	NA	2	2	NA	11	11	NA	7.22115	7.22115	NA	TRUE	FALSE	TRUE	-0.189323979	25.90609059	-1.794375244	0.101307501	0.419105538	-4.791931785	0.380437421	1	1	FA_8_3_UV - FA_8_3_noUV	Huh7	limma	0.101307501	0.419105538	FALSE	no hit	7.22115
PRKAR1A	P10644	cAMP-dependent protein kinase type I-alpha regulatory subunit OS=Homo sapiens GN=PRKAR1A PE=1 SV=1	2	1	1	1	1	8	8	8	2	2	2	6	6	4	6.536205	7.13322	5.93919	TRUE	TRUE	TRUE	-0.18694517	24.79359409	-1.79392072	0.101383585	0.419105538	-4.792585177	0.380558097	1	1	FA_8_3_UV - FA_8_3_noUV	Huh7	limma	0.101383585	0.419105538	FALSE	no hit	7.13322
LETM1	O95202	LETM1 and EF-hand domain-containing protein 1, mitochondrial OS=Homo sapiens GN=LETM1 PE=1 SV=1	1	1	NA	1	NA	8	8	NA	2	2	NA	3	3	NA	6.38834	6.38834	NA	TRUE	FALSE	TRUE	0.239752872	24.14362588	1.792196998	0.101672599	0.419105538	-4.795062305	0.381015959	1	1	FA_8_3_UV - FA_8_3_noUV	Huh7	limma	0.101672599	0.419105538	FALSE	no hit	6.38834
SQSTM1	Q13501	Sequestosome-1 OS=Homo sapiens GN=SQSTM1 PE=1 SV=1	1	1	NA	1	NA	8	8	NA	2	2	NA	2	2	NA	6.50733	6.50733	NA	TRUE	FALSE	TRUE	0.195219496	23.311982	1.790887983	0.10189258	0.419105538	-4.796942648	0.381363891	1	1	FA_8_3_UV - FA_8_3_noUV	Huh7	limma	0.10189258	0.419105538	FALSE	no hit	6.50733
PABPC1	A0A087WTT1|E7EQV3|P11940|P11940-2	Isoform 2 of Polyadenylate-binding protein 1 OS=Homo sapiens GN=PABPC1|Polyadenylate-binding protein 1 OS=Homo sapiens GN=PABPC1 PE=1 SV=2|Polyadenylate-binding protein OS=Homo sapiens GN=PABPC1 PE=1 SV=1	2	1	1	1	1	8	8	8	2	2	2	8	8	7	6.86159	7.10338	6.6198	TRUE	TRUE	TRUE	-0.195966844	26.18645296	-1.786913062	0.102563231	0.419105538	-4.802648118	0.382421607	1	1	FA_8_3_UV - FA_8_3_noUV	Huh7	limma	0.102563231	0.419105538	FALSE	no hit	7.10338
IARS2	Q9NSE4	Isoleucine--tRNA ligase, mitochondrial OS=Homo sapiens GN=IARS2 PE=1 SV=2	2	1	1	1	1	8	8	8	2	2	2	4	4	2	6.22843	6.69975	5.75711	TRUE	TRUE	TRUE	0.243597404	24.74708756	1.78456641	0.102961043	0.419105538	-4.806013354	0.383046887	1	1	FA_8_3_UV - FA_8_3_noUV	Huh7	limma	0.102961043	0.419105538	FALSE	no hit	6.69975
LAMB1	G3XAI2|P07942	Laminin subunit beta-1 OS=Homo sapiens GN=LAMB1 PE=1 SV=1|Laminin subunit beta-1 OS=Homo sapiens GN=LAMB1 PE=1 SV=2	1	1	NA	1	NA	8	8	NA	2	2	NA	14	14	NA	7.6382	7.6382	NA	TRUE	FALSE	TRUE	0.261583225	26.43260091	1.780674916	0.103623841	0.419105538	-4.811588944	0.384085181	1	1	FA_8_3_UV - FA_8_3_noUV	Huh7	limma	0.103623841	0.419105538	FALSE	no hit	7.6382
SF3B3	Q15393	Splicing factor 3B subunit 3 OS=Homo sapiens GN=SF3B3 PE=1 SV=4	2	1	1	1	1	8	8	8	2	2	2	22	22	11	7.18074	7.8313	6.53018	TRUE	TRUE	TRUE	0.335992054	27.06409764	1.780484979	0.10365629	0.419105538	-4.811860917	0.384135903	1	1	FA_8_3_UV - FA_8_3_noUV	Huh7	limma	0.10365629	0.419105538	FALSE	no hit	7.8313
RPL5	P46777	60S ribosomal protein L5 OS=Homo sapiens GN=RPL5 PE=1 SV=3	2	1	1	1	1	8	8	8	2	2	2	5	4	5	7.371495	7.50718	7.23581	TRUE	TRUE	TRUE	-0.308957578	24.26626357	-1.778503805	0.103995308	0.419105538	-4.81469689	0.384665206	1	1	FA_8_3_UV - FA_8_3_noUV	Huh7	limma	0.103995308	0.419105538	FALSE	no hit	7.50718
RRM2	C9JXC1|P31350|P31350-2	Ribonucleoside-diphosphate reductase subunit M2 (Fragment) OS=Homo sapiens GN=RRM2 PE=1 SV=1|Ribonucleoside-diphosphate reductase subunit M2 OS=Homo sapiens GN=RRM2 PE=1 SV=1|Isoform 2 of Ribonucleoside-diphosphate reductase subunit M2 OS=Homo sapiens GN=RRM2	1	1	NA	1	NA	8	8	NA	2	2	NA	4	4	NA	6.79665	6.79665	NA	TRUE	FALSE	TRUE	-0.426661964	24.1339693	-1.776326612	0.104369032	0.419105538	-4.817811564	0.385247392	1	1	FA_8_3_UV - FA_8_3_noUV	Huh7	limma	0.104369032	0.419105538	FALSE	no hit	6.79665
PTMA	B8ZZQ6|P06454|P06454-2	Prothymosin alpha OS=Homo sapiens GN=PTMA PE=1 SV=1|Prothymosin alpha OS=Homo sapiens GN=PTMA PE=1 SV=2|Isoform 2 of Prothymosin alpha OS=Homo sapiens GN=PTMA	2	1	1	1	1	8	8	8	2	2	2	5	3	5	7.126605	6.90889	7.34432	TRUE	TRUE	TRUE	-0.636065832	24.52954414	-1.776077272	0.10441191	0.419105538	-4.818168141	0.385314101	1	1	FA_8_3_UV - FA_8_3_noUV	Huh7	limma	0.10441191	0.419105538	FALSE	no hit	6.90889
ABCE1	D6R9I9|P61221	ATP-binding cassette sub-family E member 1 OS=Homo sapiens GN=ABCE1 PE=1 SV=1|ATP-binding cassette sub-family E member 1 OS=Homo sapiens GN=ABCE1 PE=1 SV=1	1	1	NA	1	NA	8	8	NA	2	2	NA	2	2	NA	6.22708	6.22708	NA	TRUE	FALSE	TRUE	-0.346934124	23.28874611	-1.775537327	0.104504818	0.419105538	-4.818940219	0.385458582	1	1	FA_8_3_UV - FA_8_3_noUV	Huh7	limma	0.104504818	0.419105538	FALSE	no hit	6.22708
NUDCD1	Q96RS6|Q96RS6-2|Q96RS6-3	NudC domain-containing protein 1 OS=Homo sapiens GN=NUDCD1 PE=1 SV=2|Isoform 2 of NudC domain-containing protein 1 OS=Homo sapiens GN=NUDCD1|Isoform 3 of NudC domain-containing protein 1 OS=Homo sapiens GN=NUDCD1	1	1	NA	1	NA	8	8	NA	2	2	NA	2	2	NA	6.23541	6.23541	NA	TRUE	FALSE	TRUE	-0.257471856	23.04617339	-1.774499648	0.10468358	0.419105538	-4.820423673	0.385736342	1	1	FA_8_3_UV - FA_8_3_noUV	Huh7	limma	0.10468358	0.419105538	FALSE	no hit	6.23541
LEO1	Q8WVC0|Q8WVC0-2	Isoform 2 of RNA polymerase-associated protein LEO1 OS=Homo sapiens GN=LEO1|RNA polymerase-associated protein LEO1 OS=Homo sapiens GN=LEO1 PE=1 SV=1	2	1	1	1	1	8	8	8	2	2	2	9	2	9	6.47339	6.07772	6.86906	TRUE	TRUE	TRUE	-0.21782916	23.33692406	-1.76659694	0.106054132	0.42228358	-4.831706429	0.387855705	1	1	FA_8_3_UV - FA_8_3_noUV	Huh7	limma	0.106054132	0.42228358	FALSE	no hit	6.07772
TLN1	Q9Y490	Talin-1 OS=Homo sapiens GN=TLN1 PE=1 SV=3	2	1	1	1	1	8	8	8	2	2	2	33	33	25	7.15144	7.52581	6.77707	TRUE	TRUE	TRUE	-0.232887424	27.4105613	-1.765615619	0.106225453	0.42228358	-4.833105627	0.388119372	1	1	FA_8_3_UV - FA_8_3_noUV	Huh7	limma	0.106225453	0.42228358	FALSE	no hit	7.52581
DNAJB11	Q9UBS4	DnaJ homolog subfamily B member 11 OS=Homo sapiens GN=DNAJB11 PE=1 SV=1	2	1	1	1	1	8	8	8	2	2	2	4	4	2	6.76083	6.76831	6.75335	TRUE	TRUE	TRUE	0.289944179	24.41304679	1.763068361	0.106671332	0.422568189	-4.836735684	0.388804293	1	1	FA_8_3_UV - FA_8_3_noUV	Huh7	limma	0.106671332	0.422568189	FALSE	no hit	6.76831
PSMA1	P25786|P25786-2	Proteasome subunit alpha type-1 OS=Homo sapiens GN=PSMA1 PE=1 SV=1|Isoform Long of Proteasome subunit alpha type-1 OS=Homo sapiens GN=PSMA1	2	1	1	1	1	8	8	8	2	2	2	8	5	8	6.85308	6.90431	6.80185	TRUE	TRUE	TRUE	-0.223759271	25.0827848	-1.753983105	0.1082755	0.422621487	-4.849660438	0.391253174	1	1	FA_8_3_UV - FA_8_3_noUV	Huh7	limma	0.1082755	0.422621487	FALSE	no hit	6.90431
RAD23B	P54727	UV excision repair protein RAD23 homolog B OS=Homo sapiens GN=RAD23B PE=1 SV=1	1	1	NA	1	NA	8	8	NA	2	2	NA	5	5	NA	7.177	7.177	NA	TRUE	FALSE	TRUE	-0.445717672	25.00900831	-1.75319641	0.108415429	0.422621487	-4.850777935	0.391465663	1	1	FA_8_3_UV - FA_8_3_noUV	Huh7	limma	0.108415429	0.422621487	FALSE	no hit	7.177
SNRNP200	O75643	U5 small nuclear ribonucleoprotein 200 kDa helicase OS=Homo sapiens GN=SNRNP200 PE=1 SV=2	2	1	1	1	1	8	8	8	2	2	2	17	17	5	6.767915	7.02162	6.51421	TRUE	TRUE	TRUE	0.218717214	26.59472207	1.744589112	0.109957136	0.422621487	-4.862987166	0.393795097	1	1	FA_8_3_UV - FA_8_3_noUV	Huh7	limma	0.109957136	0.422621487	FALSE	no hit	7.02162
PPP5C	H0YDU8|P53041	Serine/threonine-protein phosphatase (Fragment) OS=Homo sapiens GN=PPP5C PE=1 SV=1|Serine/threonine-protein phosphatase 5 OS=Homo sapiens GN=PPP5C PE=1 SV=1	1	1	NA	1	NA	8	8	NA	2	2	NA	6	6	NA	6.76611	6.76611	NA	TRUE	FALSE	TRUE	-0.339124594	25.44367919	-1.74141883	0.110529965	0.422621487	-4.867476056	0.394655196	1	1	FA_8_3_UV - FA_8_3_noUV	Huh7	limma	0.110529965	0.422621487	FALSE	no hit	6.76611
CAPNS1	A0A075B7C0|A0A0C4DGQ5|K7EIV0|K7ELJ7|P04632|U3KQE2	Calpain small subunit 1 (Fragment) OS=Homo sapiens GN=CAPNS1 PE=1 SV=1|Calpain small subunit 1 OS=Homo sapiens GN=CAPNS1 PE=1 SV=1|Calpain small subunit 1 (Fragment) OS=Homo sapiens GN=CAPNS1 PE=1 SV=2|Calpain small subunit 1 OS=Homo sapiens GN=CAPNS1 PE=1 SV=1|Calpain small subunit 1 OS=Homo sapiens GN=CAPNS1 PE=1 SV=1|Calpain small subunit 1 (Fragment) OS=Homo sapiens GN=CAPNS1 PE=1 SV=1	1	1	NA	1	NA	8	8	NA	2	2	NA	3	3	NA	6.84091	6.84091	NA	TRUE	FALSE	TRUE	-0.431446067	24.80582275	-1.740092186	0.110770473	0.422621487	-4.869353192	0.395015452	1	1	FA_8_3_UV - FA_8_3_noUV	Huh7	limma	0.110770473	0.422621487	FALSE	no hit	6.84091
EIF4G1	E7EUU4|E7EX73|E9PGM1|Q04637|Q04637-3|Q04637-4|Q04637-5|Q04637-6|Q04637-7|Q04637-8|Q04637-9	Eukaryotic translation initiation factor 4 gamma 1 OS=Homo sapiens GN=EIF4G1 PE=1 SV=1|Eukaryotic translation initiation factor 4 gamma 1 OS=Homo sapiens GN=EIF4G1 PE=1 SV=1|Eukaryotic translation initiation factor 4 gamma 1 OS=Homo sapiens GN=EIF4G1 PE=1 SV=1|Eukaryotic translation initiation factor 4 gamma 1 OS=Homo sapiens GN=EIF4G1 PE=1 SV=4|Isoform B of Eukaryotic translation initiation fact…	2	1	1	1	1	8	8	8	2	2	2	12	12	8	7.222415	7.62448	6.82035	TRUE	TRUE	TRUE	-0.282797603	26.25758597	-1.737665237	0.11121168	0.422621487	-4.872785222	0.395675015	1	1	FA_8_3_UV - FA_8_3_noUV	Huh7	limma	0.11121168	0.422621487	FALSE	no hit	7.62448
ALDH18A1	P54886|P54886-2	Delta-1-pyrroline-5-carboxylate synthase OS=Homo sapiens GN=ALDH18A1 PE=1 SV=2|Isoform Short of Delta-1-pyrroline-5-carboxylate synthase OS=Homo sapiens GN=ALDH18A1	1	1	NA	1	NA	8	8	NA	2	2	NA	8	8	NA	7.13756	7.13756	NA	TRUE	FALSE	TRUE	0.255698575	25.08641322	1.736718954	0.111384139	0.422621487	-4.874122698	0.395932363	1	1	FA_8_3_UV - FA_8_3_noUV	Huh7	limma	0.111384139	0.422621487	FALSE	no hit	7.13756
NUCB2|Nucb2|HEL-S-109	P80303|Q2L696|V9HW75	Nucleobindin-2 OS=Homo sapiens GN=NUCB2 PE=1 SV=2|Nucb2 splice variant OS=Homo sapiens GN=Nucb2 PE=1 SV=1|Epididymis secretory protein Li 109 OS=Homo sapiens GN=HEL-S-109 PE=1 SV=1	1	1	NA	1	NA	8	8	NA	2	2	NA	3	3	NA	6.3006	6.3006	NA	TRUE	FALSE	TRUE	0.250248595	24.19793587	1.735186824	0.111663881	0.422621487	-4.876287377	0.396349251	1	1	FA_8_3_UV - FA_8_3_noUV	Huh7	limma	0.111663881	0.422621487	FALSE	no hit	6.3006
TPT1	A0A0B4J2C3|E9PJF7|J3KPG2|P13693|Q5W0H4	Translationally-controlled tumor protein (Fragment) OS=Homo sapiens GN=TPT1 PE=1 SV=1|Translationally-controlled tumor protein OS=Homo sapiens GN=TPT1 PE=1 SV=1	2	1	1	1	1	8	8	8	2	2	2	5	2	5	6.35443	6.01915	6.68971	TRUE	TRUE	TRUE	-0.31207408	22.48559227	-1.734596772	0.111771784	0.422621487	-4.877120762	0.396509873	1	1	FA_8_3_UV - FA_8_3_noUV	Huh7	limma	0.111771784	0.422621487	FALSE	no hit	6.01915
GLRX5	Q86SX6	Glutaredoxin-related protein 5, mitochondrial OS=Homo sapiens GN=GLRX5 PE=1 SV=2	2	1	1	1	1	8	8	8	2	2	2	3	3	2	6.071455	6.55587	5.58704	TRUE	TRUE	TRUE	0.173959823	24.65147375	1.730453786	0.112532068	0.422621487	-4.882967985	0.397638767	1	1	FA_8_3_UV - FA_8_3_noUV	Huh7	limma	0.112532068	0.422621487	FALSE	no hit	6.55587
FKBP9	O95302|O95302-3	Isoform 3 of Peptidyl-prolyl cis-trans isomerase FKBP9 OS=Homo sapiens GN=FKBP9|Peptidyl-prolyl cis-trans isomerase FKBP9 OS=Homo sapiens GN=FKBP9 PE=1 SV=2	2	1	1	1	1	8	8	8	2	2	2	10	10	10	7.442625	7.84708	7.03817	TRUE	TRUE	TRUE	0.204196818	25.91016798	1.729392581	0.112727561	0.422621487	-4.884464509	0.397928239	1	1	FA_8_3_UV - FA_8_3_noUV	Huh7	limma	0.112727561	0.422621487	FALSE	no hit	7.84708
IDH1	O75874	Isocitrate dehydrogenase [NADP] cytoplasmic OS=Homo sapiens GN=IDH1 PE=1 SV=2	2	1	1	1	1	8	8	8	2	2	2	3	3	2	6.36599	6.31932	6.41266	TRUE	TRUE	TRUE	-0.479094075	23.86131256	-1.727957193	0.112992472	0.422621487	-4.886487922	0.398319982	1	1	FA_8_3_UV - FA_8_3_noUV	Huh7	limma	0.112992472	0.422621487	FALSE	no hit	6.31932
MAPK1	P28482	Mitogen-activated protein kinase 1 OS=Homo sapiens GN=MAPK1 PE=1 SV=3	1	1	NA	1	NA	8	8	NA	2	2	NA	2	2	NA	6.85372	6.85372	NA	TRUE	FALSE	TRUE	-0.247976312	24.28675501	-1.727598664	0.113058729	0.422621487	-4.886993185	0.398417867	1	1	FA_8_3_UV - FA_8_3_noUV	Huh7	limma	0.113058729	0.422621487	FALSE	no hit	6.85372
LRPPRC	P42704	Leucine-rich PPR motif-containing protein, mitochondrial OS=Homo sapiens GN=LRPPRC PE=1 SV=3	2	1	1	1	1	8	8	8	2	2	2	41	17	41	7.82039	8.13882	7.50196	TRUE	TRUE	TRUE	0.2750856	27.28294095	1.721973337	0.114102897	0.422621487	-4.894913336	0.399955582	1	1	FA_8_3_UV - FA_8_3_noUV	Huh7	limma	0.114102897	0.422621487	FALSE	no hit	8.13882
RAB7A	P51149	Ras-related protein Rab-7a OS=Homo sapiens GN=RAB7A PE=1 SV=1	2	1	1	1	1	8	8	8	2	2	2	8	5	8	6.79934	6.59569	7.00299	TRUE	TRUE	TRUE	0.172042883	25.08181849	1.720780846	0.11432536	0.422621487	-4.896590498	0.400282014	1	1	FA_8_3_UV - FA_8_3_noUV	Huh7	limma	0.11432536	0.422621487	FALSE	no hit	6.59569
TIAL1	Q01085|Q01085-2	Nucleolysin TIAR OS=Homo sapiens GN=TIAL1 PE=1 SV=1|Isoform 2 of Nucleolysin TIAR OS=Homo sapiens GN=TIAL1	1	1	NA	1	NA	8	8	NA	2	2	NA	2	2	NA	6.24872	6.24872	NA	TRUE	FALSE	TRUE	-0.226410341	22.14812828	-1.719382673	0.114586691	0.422621487	-4.898556132	0.400664953	1	1	FA_8_3_UV - FA_8_3_noUV	Huh7	limma	0.114586691	0.422621487	FALSE	no hit	6.24872
AARS2	Q5JTZ9	Alanine--tRNA ligase, mitochondrial OS=Homo sapiens GN=AARS2 PE=1 SV=1	1	1	NA	1	NA	8	8	NA	2	2	NA	3	3	NA	6.56349	6.56349	NA	TRUE	FALSE	TRUE	0.263801338	23.86078551	1.717974951	0.11485035	0.422621487	-4.900534313	0.40105073	1	1	FA_8_3_UV - FA_8_3_noUV	Huh7	limma	0.11485035	0.422621487	FALSE	no hit	6.56349
HPRT1	P00492	Hypoxanthine-guanine phosphoribosyltransferase OS=Homo sapiens GN=HPRT1 PE=1 SV=2	1	1	NA	1	NA	8	8	NA	2	2	NA	6	6	NA	6.78796	6.78796	NA	TRUE	FALSE	TRUE	-0.454895519	25.2100634	-1.717329793	0.114971368	0.422621487	-4.901440617	0.401227606	1	1	FA_8_3_UV - FA_8_3_noUV	Huh7	limma	0.114971368	0.422621487	FALSE	no hit	6.78796
TRNT1	Q96Q11|Q96Q11-2	CCA tRNA nucleotidyltransferase 1, mitochondrial OS=Homo sapiens GN=TRNT1 PE=1 SV=2|Isoform 2 of CCA tRNA nucleotidyltransferase 1, mitochondrial OS=Homo sapiens GN=TRNT1	2	1	1	1	1	8	8	8	2	2	2	2	2	2	5.869835	5.71823	6.02144	TRUE	TRUE	TRUE	0.223547508	22.05371964	1.715556082	0.115304669	0.422621487	-4.903931332	0.401714126	1	1	FA_8_3_UV - FA_8_3_noUV	Huh7	limma	0.115304669	0.422621487	FALSE	no hit	5.71823
SUCLG2	Q96I99	Succinyl-CoA ligase [GDP-forming] subunit beta, mitochondrial OS=Homo sapiens GN=SUCLG2 PE=1 SV=2	2	1	1	1	1	8	8	8	2	2	2	8	8	3	6.69844	7.14435	6.25253	TRUE	TRUE	TRUE	0.183666532	26.2128193	1.715442385	0.115326064	0.422621487	-4.904090942	0.401745325	1	1	FA_8_3_UV - FA_8_3_noUV	Huh7	limma	0.115326064	0.422621487	FALSE	no hit	7.14435
ISYNA1	Q9NPH2|Q9NPH2-2|Q9NPH2-3	Inositol-3-phosphate synthase 1 OS=Homo sapiens GN=ISYNA1 PE=1 SV=1|Isoform 2 of Inositol-3-phosphate synthase 1 OS=Homo sapiens GN=ISYNA1|Isoform 3 of Inositol-3-phosphate synthase 1 OS=Homo sapiens GN=ISYNA1	1	1	NA	1	NA	8	8	NA	2	2	NA	2	2	NA	6.79442	6.79442	NA	TRUE	FALSE	TRUE	-0.255033925	22.58170568	-1.713763271	0.115642443	0.422621487	-4.90644744	0.402206245	1	1	FA_8_3_UV - FA_8_3_noUV	Huh7	limma	0.115642443	0.422621487	FALSE	no hit	6.79442
PAOX	Q6QHF9|Q6QHF9-2	Peroxisomal N(1)-acetyl-spermine/spermidine oxidase OS=Homo sapiens GN=PAOX PE=1 SV=3|Isoform 1 of Peroxisomal N(1)-acetyl-spermine/spermidine oxidase OS=Homo sapiens GN=PAOX	1	1	NA	1	NA	8	8	NA	2	2	NA	2	2	NA	6.61802	6.61802	NA	TRUE	FALSE	TRUE	0.241453861	22.85580752	1.712543308	0.115872799	0.422621487	-4.908158765	0.402541325	1	1	FA_8_3_UV - FA_8_3_noUV	Huh7	limma	0.115872799	0.422621487	FALSE	no hit	6.61802
MYH9	P35579	Myosin-9 OS=Homo sapiens GN=MYH9 PE=1 SV=4	2	1	1	1	1	8	8	8	2	2	2	43	43	24	7.36829	7.74272	6.99386	TRUE	TRUE	TRUE	-0.328311101	28.12755644	-1.711089492	0.116147851	0.422621487	-4.910197262	0.402940856	1	1	FA_8_3_UV - FA_8_3_noUV	Huh7	limma	0.116147851	0.422621487	FALSE	no hit	7.74272
SERBP1	Q8NC51-2|Q8NC51-3|Q8NC51-4	Isoform 2 of Plasminogen activator inhibitor 1 RNA-binding protein OS=Homo sapiens GN=SERBP1|Isoform 3 of Plasminogen activator inhibitor 1 RNA-binding protein OS=Homo sapiens GN=SERBP1|Isoform 4 of Plasminogen activator inhibitor 1 RNA-binding protein OS=Homo sapiens GN=SERBP1	2	1	1	1	1	8	8	8	2	2	2	6	4	6	7.04148	7.26636	6.8166	TRUE	TRUE	TRUE	-0.205803538	24.66806115	-1.708551554	0.116629419	0.422621487	-4.91375361	0.403638889	1	1	FA_8_3_UV - FA_8_3_noUV	Huh7	limma	0.116629419	0.422621487	FALSE	no hit	7.26636
NUP133	Q8WUM0	Nuclear pore complex protein Nup133 OS=Homo sapiens GN=NUP133 PE=1 SV=2	2	1	1	1	1	8	8	8	2	2	2	15	15	2	6.43729	7.15683	5.71775	TRUE	TRUE	TRUE	0.285650338	26.42448726	1.707083108	0.116908873	0.422621487	-4.915809982	0.4040431	1	1	FA_8_3_UV - FA_8_3_noUV	Huh7	limma	0.116908873	0.422621487	FALSE	no hit	7.15683
PRDX3	P30048|P30048-2	Thioredoxin-dependent peroxide reductase, mitochondrial OS=Homo sapiens GN=PRDX3 PE=1 SV=3|Isoform 2 of Thioredoxin-dependent peroxide reductase, mitochondrial OS=Homo sapiens GN=PRDX3	2	1	1	1	1	8	8	8	2	2	2	7	6	7	7.98113	8.12351	7.83875	TRUE	TRUE	TRUE	0.325553784	25.98114716	1.70665256	0.116990923	0.422621487	-4.916412727	0.404161661	1	1	FA_8_3_UV - FA_8_3_noUV	Huh7	limma	0.116990923	0.422621487	FALSE	no hit	8.12351
YWHAE	P62258	14-3-3 protein epsilon OS=Homo sapiens GN=YWHAE PE=1 SV=1	2	1	1	1	1	8	8	8	2	2	2	12	9	12	7.735205	8.12023	7.35018	TRUE	TRUE	TRUE	-0.469466039	26.11833637	-1.70396481	0.1175043	0.422621487	-4.92017354	0.40490226	1	1	FA_8_3_UV - FA_8_3_noUV	Huh7	limma	0.1175043	0.422621487	FALSE	no hit	8.12023
FDPS	A0A087WVN4|P14324|P14324-2	Farnesyl pyrophosphate synthase (Fragment) OS=Homo sapiens GN=FDPS PE=1 SV=1|Farnesyl pyrophosphate synthase OS=Homo sapiens GN=FDPS PE=1 SV=4|Isoform 2 of Farnesyl pyrophosphate synthase OS=Homo sapiens GN=FDPS	2	1	1	1	1	8	8	8	2	2	2	6	3	6	7.074565	7.11185	7.03728	TRUE	TRUE	TRUE	-0.250946786	23.99364811	-1.703790278	0.117537707	0.422621487	-4.920417641	0.404950379	1	1	FA_8_3_UV - FA_8_3_noUV	Huh7	limma	0.117537707	0.422621487	FALSE	no hit	7.11185
PPP4R3A	G3V5Z3|Q6IN85|Q6IN85-2	Serine/threonine-protein phosphatase 4 regulatory subunit 3A OS=Homo sapiens GN=PPP4R3A PE=1 SV=1|Serine/threonine-protein phosphatase 4 regulatory subunit 3A OS=Homo sapiens GN=PPP4R3A PE=1 SV=1|Isoform 2 of Serine/threonine-protein phosphatase 4 regulatory subunit 3A OS=Homo sapiens GN=PPP4R3A	1	1	NA	1	NA	8	8	NA	2	2	NA	7	7	NA	6.82738	6.82738	NA	TRUE	FALSE	TRUE	-0.204032207	25.18507185	-1.703776048	0.117540431	0.422621487	-4.920437541	0.404954303	1	1	FA_8_3_UV - FA_8_3_noUV	Huh7	limma	0.117540431	0.422621487	FALSE	no hit	6.82738
HK2	E9PB90|P52789	Hexokinase-2 OS=Homo sapiens GN=HK2 PE=1 SV=1|Hexokinase-2 OS=Homo sapiens GN=HK2 PE=1 SV=2	2	1	1	1	1	8	8	8	2	2	2	11	11	4	6.73741	7.53762	5.9372	TRUE	TRUE	TRUE	0.204735159	26.20438439	1.701135588	0.118046886	0.423095031	-4.92412878	0.405682717	1	1	FA_8_3_UV - FA_8_3_noUV	Huh7	limma	0.118046886	0.423095031	FALSE	no hit	7.53762
PPP1CB	P62140	Serine/threonine-protein phosphatase PP1-beta catalytic subunit OS=Homo sapiens GN=PPP1CB PE=1 SV=3	1	1	NA	1	NA	8	8	NA	2	2	NA	2	2	NA	6.24889	6.24889	NA	TRUE	FALSE	TRUE	0.294101786	23.02400706	1.697306305	0.118784847	0.423449056	-4.929476323	0.406740477	1	1	FA_8_3_UV - FA_8_3_noUV	Huh7	limma	0.118784847	0.423449056	FALSE	no hit	6.24889
PML	P29590|P29590-2|P29590-3|P29590-4|P29590-5|P29590-8|P29590-9	Protein PML OS=Homo sapiens GN=PML PE=1 SV=3|Isoform PML-5 of Protein PML OS=Homo sapiens GN=PML|Isoform PML-8 of Protein PML OS=Homo sapiens GN=PML|Isoform PML-6 of Protein PML OS=Homo sapiens GN=PML|Isoform PML-4 of Protein PML OS=Homo sapiens GN=PML|Isoform PML-2 of Protein PML OS=Homo sapiens GN=PML|Isoform PML-3 of Protein PML OS=Homo sapiens GN=PML	2	1	1	1	1	8	8	8	2	2	2	6	5	6	6.70419	6.93622	6.47216	TRUE	TRUE	TRUE	0.208074961	24.87177426	1.696066659	0.119024631	0.423449056	-4.931206043	0.407083256	1	1	FA_8_3_UV - FA_8_3_noUV	Huh7	limma	0.119024631	0.423449056	FALSE	no hit	6.93622
TST	Q16762	Thiosulfate sulfurtransferase OS=Homo sapiens GN=TST PE=1 SV=4	1	1	NA	1	NA	8	8	NA	2	2	NA	5	5	NA	7.19143	7.19143	NA	TRUE	FALSE	TRUE	0.156648379	24.92703256	1.692680002	0.119681927	0.423449056	-4.935927989	0.40802059	1	1	FA_8_3_UV - FA_8_3_noUV	Huh7	limma	0.119681927	0.423449056	FALSE	no hit	7.19143
PSME1	Q06323|Q06323-2|Q06323-3	Proteasome activator complex subunit 1 OS=Homo sapiens GN=PSME1 PE=1 SV=1|Isoform 2 of Proteasome activator complex subunit 1 OS=Homo sapiens GN=PSME1|Isoform 3 of Proteasome activator complex subunit 1 OS=Homo sapiens GN=PSME1	2	1	1	1	1	8	8	8	2	2	2	7	4	7	6.551755	6.52136	6.58215	TRUE	TRUE	TRUE	-0.250585236	24.47765908	-1.691098841	0.119989919	0.423449056	-4.938130775	0.408458652	1	1	FA_8_3_UV - FA_8_3_noUV	Huh7	limma	0.119989919	0.423449056	FALSE	no hit	6.52136
SEC23IP	Q9Y6Y8	SEC23-interacting protein OS=Homo sapiens GN=SEC23IP PE=1 SV=1	1	1	NA	1	NA	8	8	NA	2	2	NA	5	5	NA	6.5323	6.5323	NA	TRUE	FALSE	TRUE	0.202771135	24.92821723	1.689705994	0.120261817	0.423449056	-4.940070263	0.408844773	1	1	FA_8_3_UV - FA_8_3_noUV	Huh7	limma	0.120261817	0.423449056	FALSE	no hit	6.5323
INTS3	Q68E01|Q68E01-2	Integrator complex subunit 3 OS=Homo sapiens GN=INTS3 PE=1 SV=1|Isoform 2 of Integrator complex subunit 3 OS=Homo sapiens GN=INTS3	1	1	NA	1	NA	8	8	NA	2	2	NA	2	2	NA	6.22653	6.22653	NA	TRUE	FALSE	TRUE	0.309806022	22.44500224	1.687383233	0.120716474	0.423449056	-4.943302644	0.409489166	1	1	FA_8_3_UV - FA_8_3_noUV	Huh7	limma	0.120716474	0.423449056	FALSE	no hit	6.22653
OTULIN	Q96BN8	Ubiquitin thioesterase otulin OS=Homo sapiens GN=OTULIN PE=1 SV=3	1	1	NA	1	NA	8	8	NA	2	2	NA	2	2	NA	6.70344	6.70344	NA	TRUE	FALSE	TRUE	-0.287131279	23.81047485	-1.685468056	0.121092508	0.423449056	-4.945965962	0.410020939	1	1	FA_8_3_UV - FA_8_3_noUV	Huh7	limma	0.121092508	0.423449056	FALSE	no hit	6.70344
EWSR1	A0A0D9SFL3|B0QYK0|C9JGE3|H7BY36|Q01844|Q01844-2|Q01844-3|Q01844-5|Q01844-6	RNA-binding protein EWS OS=Homo sapiens GN=EWSR1 PE=1 SV=1|RNA-binding protein EWS OS=Homo sapiens GN=EWSR1 PE=1 SV=1|EWS RNA-binding protein variant 6 OS=Homo sapiens GN=EWSR1 PE=1 SV=2|RNA-binding protein EWS (Fragment) OS=Homo sapiens GN=EWSR1 PE=1 SV=1|RNA-binding protein EWS OS=Homo sapiens GN=EWSR1 PE=1 SV=1|Isoform EWS-B of RNA-binding protein EWS OS=Homo sapiens GN=EWSR1|Isoform 3 of RNA-…	2	1	1	1	1	8	8	8	2	2	2	2	2	2	6.773525	6.66773	6.87932	TRUE	TRUE	TRUE	-0.326328652	24.12741762	-1.685195097	0.121146187	0.423449056	-4.946345411	0.410096763	1	1	FA_8_3_UV - FA_8_3_noUV	Huh7	limma	0.121146187	0.423449056	FALSE	no hit	6.66773
GTPBP4	Q9BZE4|Q9BZE4-2	Nucleolar GTP-binding protein 1 OS=Homo sapiens GN=GTPBP4 PE=1 SV=3|Isoform 2 of Nucleolar GTP-binding protein 1 OS=Homo sapiens GN=GTPBP4	1	1	NA	1	NA	8	8	NA	2	2	NA	2	2	NA	6.078	6.078	NA	TRUE	FALSE	TRUE	0.255121272	23.39514124	1.680226754	0.122126977	0.424386435	-4.953246067	0.411478349	1	1	FA_8_3_UV - FA_8_3_noUV	Huh7	limma	0.122126977	0.424386435	FALSE	no hit	6.078
MUT	P22033	Methylmalonyl-CoA mutase, mitochondrial OS=Homo sapiens GN=MUT PE=1 SV=4	1	1	NA	1	NA	8	8	NA	2	2	NA	3	3	NA	6.39801	6.39801	NA	TRUE	FALSE	TRUE	0.243612892	23.6730574	1.680029026	0.122166157	0.424386435	-4.95352046	0.41153339	1	1	FA_8_3_UV - FA_8_3_noUV	Huh7	limma	0.122166157	0.424386435	FALSE	no hit	6.39801
PPM1G	O15355	Protein phosphatase 1G OS=Homo sapiens GN=PPM1G PE=1 SV=1	2	1	1	1	1	8	8	8	2	2	2	6	4	6	6.761255	6.98731	6.5352	TRUE	TRUE	TRUE	-0.456766079	24.92576273	-1.677774724	0.122613642	0.424415567	-4.956647545	0.412161221	1	1	FA_8_3_UV - FA_8_3_noUV	Huh7	limma	0.122613642	0.424415567	FALSE	no hit	6.98731
RPLP1	P05386	60S acidic ribosomal protein P1 OS=Homo sapiens GN=RPLP1 PE=1 SV=1	2	1	1	1	1	8	8	8	2	2	2	3	3	2	5.94644	6.2329	5.65998	TRUE	TRUE	TRUE	-0.259445336	24.6355865	-1.676203572	0.122926386	0.424415567	-4.958825594	0.412599129	1	1	FA_8_3_UV - FA_8_3_noUV	Huh7	limma	0.122926386	0.424415567	FALSE	no hit	6.2329
GSS	P48637	Glutathione synthetase OS=Homo sapiens GN=GSS PE=1 SV=1	2	1	1	1	1	8	8	8	2	2	2	4	4	2	6.389785	6.69462	6.08495	TRUE	TRUE	TRUE	-0.463237999	24.50215916	-1.668920068	0.124385535	0.428144113	-4.968907519	0.414632766	1	1	FA_8_3_UV - FA_8_3_noUV	Huh7	limma	0.124385535	0.428144113	FALSE	no hit	6.69462
ALDH1A1	P00352	Retinal dehydrogenase 1 OS=Homo sapiens GN=ALDH1A1 PE=1 SV=2	1	1	NA	1	NA	8	8	NA	2	2	NA	19	19	NA	7.88738	7.88738	NA	TRUE	FALSE	TRUE	-0.384609439	26.96255838	-1.662437968	0.125697124	0.42960324	-4.977859245	0.416447617	1	1	FA_8_3_UV - FA_8_3_noUV	Huh7	limma	0.125697124	0.42960324	FALSE	no hit	7.88738
NARS	O43776	Asparagine--tRNA ligase, cytoplasmic OS=Homo sapiens GN=NARS PE=1 SV=1	2	1	1	1	1	8	8	8	2	2	2	4	3	4	6.23888	6.43567	6.04209	TRUE	TRUE	TRUE	-0.333125803	24.11617905	-1.659988002	0.126196055	0.42960324	-4.981237477	0.417134775	1	1	FA_8_3_UV - FA_8_3_noUV	Huh7	limma	0.126196055	0.42960324	FALSE	no hit	6.43567
NUMA1	Q14980|Q14980-2|Q14980-3|Q14980-4	Isoform 2 of Nuclear mitotic apparatus protein 1 OS=Homo sapiens GN=NUMA1|Isoform Numa-m of Nuclear mitotic apparatus protein 1 OS=Homo sapiens GN=NUMA1|Isoform Numa-s of Nuclear mitotic apparatus protein 1 OS=Homo sapiens GN=NUMA1|Nuclear mitotic apparatus protein 1 OS=Homo sapiens GN=NUMA1 PE=1 SV=2	2	1	1	1	1	8	8	8	2	2	2	37	23	37	7.23765	7.40408	7.07122	TRUE	TRUE	TRUE	0.285522145	27.17927053	1.658997586	0.126398253	0.42960324	-4.982602347	0.417412753	1	1	FA_8_3_UV - FA_8_3_noUV	Huh7	limma	0.126398253	0.42960324	FALSE	no hit	7.40408
HNRNPH3	P31942|P31942-2|P31942-3|P31942-4	Heterogeneous nuclear ribonucleoprotein H3 OS=Homo sapiens GN=HNRNPH3 PE=1 SV=2|Isoform 2 of Heterogeneous nuclear ribonucleoprotein H3 OS=Homo sapiens GN=HNRNPH3|Isoform 3 of Heterogeneous nuclear ribonucleoprotein H3 OS=Homo sapiens GN=HNRNPH3|Isoform 4 of Heterogeneous nuclear ribonucleoprotein H3 OS=Homo sapiens GN=HNRNPH3	2	1	1	1	1	8	8	8	2	2	2	2	2	2	6.50517	6.77958	6.23076	TRUE	TRUE	TRUE	0.164548206	23.40927614	1.656099534	0.126991561	0.42960324	-4.986593421	0.418226769	1	1	FA_8_3_UV - FA_8_3_noUV	Huh7	limma	0.126991561	0.42960324	FALSE	no hit	6.77958
PKM	P14618|P14618-2	Isoform M1 of Pyruvate kinase PKM OS=Homo sapiens GN=PKM|Pyruvate kinase PKM OS=Homo sapiens GN=PKM PE=1 SV=4	2	1	1	1	1	8	8	8	2	2	2	24	24	23	8.009395	8.32641	7.69238	TRUE	TRUE	TRUE	-0.364881905	27.47717215	-1.655773291	0.127058507	0.42960324	-4.987042459	0.418318464	1	1	FA_8_3_UV - FA_8_3_noUV	Huh7	limma	0.127058507	0.42960324	FALSE	no hit	8.32641
AGPS	O00116	Alkyldihydroxyacetonephosphate synthase, peroxisomal OS=Homo sapiens GN=AGPS PE=1 SV=1	1	1	NA	1	NA	8	8	NA	2	2	NA	6	6	NA	6.7343	6.7343	NA	TRUE	FALSE	TRUE	0.275661425	24.72960673	1.655216295	0.127172877	0.42960324	-4.987808989	0.418475043	1	1	FA_8_3_UV - FA_8_3_noUV	Huh7	limma	0.127172877	0.42960324	FALSE	no hit	6.7343
ALDH4A1	P30038|P30038-3	Delta-1-pyrroline-5-carboxylate dehydrogenase, mitochondrial OS=Homo sapiens GN=ALDH4A1 PE=1 SV=3|Isoform 3 of Delta-1-pyrroline-5-carboxylate dehydrogenase, mitochondrial OS=Homo sapiens GN=ALDH4A1	1	1	NA	1	NA	8	8	NA	2	2	NA	4	4	NA	6.82346	6.82346	NA	TRUE	FALSE	TRUE	0.250207301	24.72038767	1.65014228	0.128218969	0.42960324	-4.994784976	0.419903	1	1	FA_8_3_UV - FA_8_3_noUV	Huh7	limma	0.128218969	0.42960324	FALSE	no hit	6.82346
IPO5	O00410|O00410-3	Importin-5 OS=Homo sapiens GN=IPO5 PE=1 SV=4|Isoform 3 of Importin-5 OS=Homo sapiens GN=IPO5	1	1	NA	1	NA	8	8	NA	2	2	NA	20	20	NA	7.73863	7.73863	NA	TRUE	FALSE	TRUE	-0.211561514	26.50362658	-1.649701535	0.128310197	0.42960324	-4.995390353	0.420027172	1	1	FA_8_3_UV - FA_8_3_noUV	Huh7	limma	0.128310197	0.42960324	FALSE	no hit	7.73863
EEF1A1|EEF1A1P5	P68104|Q5VTE0	Elongation factor 1-alpha 1 OS=Homo sapiens GN=EEF1A1 PE=1 SV=1|Putative elongation factor 1-alpha-like 3 OS=Homo sapiens GN=EEF1A1P5 PE=5 SV=1	2	1	1	1	1	8	8	8	2	2	2	12	6	12	7.799845	7.91569	7.684	TRUE	TRUE	TRUE	-0.406180875	25.11173349	-1.648728232	0.128511861	0.42960324	-4.996726887	0.420301458	1	1	FA_8_3_UV - FA_8_3_noUV	Huh7	limma	0.128511861	0.42960324	FALSE	no hit	7.91569
P3H1	Q32P28|Q32P28-3|Q32P28-4	Isoform 3 of Prolyl 3-hydroxylase 1 OS=Homo sapiens GN=P3H1|Isoform 4 of Prolyl 3-hydroxylase 1 OS=Homo sapiens GN=P3H1|Prolyl 3-hydroxylase 1 OS=Homo sapiens GN=P3H1 PE=1 SV=2	2	1	1	1	1	8	8	8	2	2	2	7	7	7	7.056145	7.25518	6.85711	TRUE	TRUE	TRUE	0.195532998	25.26243882	1.645542114	0.129173983	0.42960324	-5.00109888	0.421200075	1	1	FA_8_3_UV - FA_8_3_noUV	Huh7	limma	0.129173983	0.42960324	FALSE	no hit	7.25518
ACSL4	O60488|O60488-2	Long-chain-fatty-acid--CoA ligase 4 OS=Homo sapiens GN=ACSL4 PE=1 SV=2|Isoform Short of Long-chain-fatty-acid--CoA ligase 4 OS=Homo sapiens GN=ACSL4	1	1	NA	1	NA	8	8	NA	2	2	NA	2	2	NA	5.92625	5.92625	NA	TRUE	FALSE	TRUE	0.314994728	23.31145062	1.644400348	0.129411997	0.42960324	-5.002664429	0.421522374	1	1	FA_8_3_UV - FA_8_3_noUV	Huh7	limma	0.129411997	0.42960324	FALSE	no hit	5.92625
VARS2	A0A0A0MTG1|A0A0G2JIA5|A0A0G2JL52|A0A140T8Y0|A0A140TA35|A0A140TA36|A0A140TA40|A0A140TA45|B4E0K6|B7ZL25|Q5ST30|Q5ST30-3|Q5ST30-4	Valine--tRNA ligase, mitochondrial OS=Homo sapiens GN=VARS2 PE=1 SV=1|Valine--tRNA ligase, mitochondrial OS=Homo sapiens GN=VARS2 PE=1 SV=1|Valine--tRNA ligase, mitochondrial OS=Homo sapiens GN=VARS2 PE=1 SV=1|Valine--tRNA ligase, mitochondrial OS=Homo sapiens GN=VARS2 PE=1 SV=1|Valine--tRNA ligase, mitochondrial OS=Homo sapiens GN=VARS2 PE=1 SV=1|Valine--tRNA ligase, mitochondrial OS=Homo sapien…	1	1	NA	1	NA	8	8	NA	2	2	NA	3	3	NA	6.11578	6.11578	NA	TRUE	FALSE	TRUE	0.239158209	23.27879859	1.643438994	0.129612704	0.42960324	-5.003982119	0.421793859	1	1	FA_8_3_UV - FA_8_3_noUV	Huh7	limma	0.129612704	0.42960324	FALSE	no hit	6.11578
WDR3	Q9UNX4	WD repeat-containing protein 3 OS=Homo sapiens GN=WDR3 PE=1 SV=1	1	1	NA	1	NA	8	8	NA	2	2	NA	2	2	NA	6.6069	6.6069	NA	TRUE	FALSE	TRUE	0.261705218	23.1125295	1.640907315	0.130142581	0.42960324	-5.007450065	0.42250929	1	1	FA_8_3_UV - FA_8_3_noUV	Huh7	limma	0.130142581	0.42960324	FALSE	no hit	6.6069
EXOSC10	Q01780|Q01780-2	Exosome component 10 OS=Homo sapiens GN=EXOSC10 PE=1 SV=2|Isoform 2 of Exosome component 10 OS=Homo sapiens GN=EXOSC10	2	1	1	1	1	8	8	8	2	2	2	3	2	3	5.935645	6.04542	5.82587	TRUE	TRUE	TRUE	0.19375858	23.48965783	1.639034328	0.130535832	0.42960324	-5.010013735	0.423039038	1	1	FA_8_3_UV - FA_8_3_noUV	Huh7	limma	0.130535832	0.42960324	FALSE	no hit	6.04542
NDUFS3	O75489	NADH dehydrogenase [ubiquinone] iron-sulfur protein 3, mitochondrial OS=Homo sapiens GN=NDUFS3 PE=1 SV=1	1	1	NA	1	NA	8	8	NA	2	2	NA	3	3	NA	6.22828	6.22828	NA	TRUE	FALSE	TRUE	0.273692225	23.22069625	1.638435409	0.130661804	0.42960324	-5.010833156	0.423208516	1	1	FA_8_3_UV - FA_8_3_noUV	Huh7	limma	0.130661804	0.42960324	FALSE	no hit	6.22828
IDE	P14735	Insulin-degrading enzyme OS=Homo sapiens GN=IDE PE=1 SV=4	2	1	1	1	1	8	8	8	2	2	2	14	14	3	6.40883	7.01207	5.80559	TRUE	TRUE	TRUE	-0.192317342	26.21609025	-1.633487257	0.131706693	0.42960324	-5.017596413	0.424610228	1	1	FA_8_3_UV - FA_8_3_noUV	Huh7	limma	0.131706693	0.42960324	FALSE	no hit	7.01207
FARSB	Q9NSD9|Q9NSD9-2	Phenylalanine--tRNA ligase beta subunit OS=Homo sapiens GN=FARSB PE=1 SV=3|Isoform 2 of Phenylalanine--tRNA ligase beta subunit OS=Homo sapiens GN=FARSB	1	1	NA	1	NA	8	8	NA	2	2	NA	3	3	NA	6.36311	6.36311	NA	TRUE	FALSE	TRUE	-0.34433387	23.21685413	-1.63172494	0.132080624	0.42960324	-5.020002328	0.425110112	1	1	FA_8_3_UV - FA_8_3_noUV	Huh7	limma	0.132080624	0.42960324	FALSE	no hit	6.36311
UGDH	O60701	UDP-glucose 6-dehydrogenase OS=Homo sapiens GN=UGDH PE=1 SV=1	1	1	NA	1	NA	8	8	NA	2	2	NA	7	7	NA	6.74235	6.74235	NA	TRUE	FALSE	TRUE	-0.329964592	25.07795093	-1.629884587	0.132472118	0.42960324	-5.022513166	0.425632497	1	1	FA_8_3_UV - FA_8_3_noUV	Huh7	limma	0.132472118	0.42960324	FALSE	no hit	6.74235
E7EVH7|KLC1	E7EVH7|F8W6L3|G3V2E7|G3V3H3|G3V5R9|G5E9S8|Q07866|Q07866-10|Q07866-2|Q07866-3|Q07866-4|Q07866-5|Q07866-6|Q07866-7|Q07866-8|Q07866-9	Uncharacterized protein OS=Homo sapiens PE=4 SV=1|Kinesin light chain 1 OS=Homo sapiens GN=KLC1 PE=1 SV=1|Kinesin light chain 1 OS=Homo sapiens GN=KLC1 PE=1 SV=1|Kinesin light chain 1 OS=Homo sapiens GN=KLC1 PE=1 SV=1|Kinesin light chain 1 OS=Homo sapiens GN=KLC1 PE=1 SV=1|Kinesin light chain 1 OS=Homo sapiens GN=KLC1 PE=1 SV=1|Kinesin light chain 1 OS=Homo sapiens GN=KLC1 PE=1 SV=2|Isoform D of …	1	1	NA	1	NA	8	8	NA	2	2	NA	2	2	NA	6.14675	6.14675	NA	TRUE	FALSE	TRUE	-0.223085865	23.44629707	-1.628988326	0.13266315	0.42960324	-5.02373536	0.425887037	1	1	FA_8_3_UV - FA_8_3_noUV	Huh7	limma	0.13266315	0.42960324	FALSE	no hit	6.14675
PPA1	Q15181	Inorganic pyrophosphatase OS=Homo sapiens GN=PPA1 PE=1 SV=2	1	1	NA	1	NA	8	8	NA	2	2	NA	4	4	NA	6.7171	6.7171	NA	TRUE	FALSE	TRUE	-0.453318799	24.55353356	-1.628739138	0.132716307	0.42960324	-5.024075098	0.425957822	1	1	FA_8_3_UV - FA_8_3_noUV	Huh7	limma	0.132716307	0.42960324	FALSE	no hit	6.7171
HSP90AB1	P08238	Heat shock protein HSP 90-beta OS=Homo sapiens GN=HSP90AB1 PE=1 SV=4	2	1	1	1	1	8	8	8	2	2	2	17	17	14	8.407075	8.7737	8.04045	TRUE	TRUE	TRUE	-0.313817436	27.42486383	-1.627751813	0.132927106	0.42960324	-5.025420901	0.426238355	1	1	FA_8_3_UV - FA_8_3_noUV	Huh7	limma	0.132927106	0.42960324	FALSE	no hit	8.7737
PLS1	Q14651	Plastin-1 OS=Homo sapiens GN=PLS1 PE=1 SV=2	1	1	NA	1	NA	8	8	NA	2	2	NA	5	5	NA	6.43169	6.43169	NA	TRUE	FALSE	TRUE	-0.265538255	24.89575426	-1.626162883	0.133266974	0.42960324	-5.027585739	0.426690049	1	1	FA_8_3_UV - FA_8_3_noUV	Huh7	limma	0.133266974	0.42960324	FALSE	no hit	6.43169
MTPN	P58546	Myotrophin OS=Homo sapiens GN=MTPN PE=1 SV=2	2	1	1	1	1	8	8	8	2	2	2	2	2	2	6.67242	6.6808	6.66404	TRUE	TRUE	TRUE	-0.421206401	23.75487257	-1.622977792	0.133950578	0.42960324	-5.031921554	0.427596334	1	1	FA_8_3_UV - FA_8_3_noUV	Huh7	limma	0.133950578	0.42960324	FALSE	no hit	6.6808
UAP1	Q16222|Q16222-2|Q16222-3	UDP-N-acetylhexosamine pyrophosphorylase OS=Homo sapiens GN=UAP1 PE=1 SV=3|Isoform AGX1 of UDP-N-acetylhexosamine pyrophosphorylase OS=Homo sapiens GN=UAP1|Isoform 3 of UDP-N-acetylhexosamine pyrophosphorylase OS=Homo sapiens GN=UAP1	1	1	NA	1	NA	8	8	NA	2	2	NA	4	4	NA	7.27633	7.27633	NA	TRUE	FALSE	TRUE	-0.423052673	24.38292074	-1.621575884	0.134252447	0.42960324	-5.033828375	0.427995587	1	1	FA_8_3_UV - FA_8_3_noUV	Huh7	limma	0.134252447	0.42960324	FALSE	no hit	7.27633
ACADVL	P49748|P49748-2|P49748-3	Very long-chain specific acyl-CoA dehydrogenase, mitochondrial OS=Homo sapiens GN=ACADVL PE=1 SV=1|Isoform 2 of Very long-chain specific acyl-CoA dehydrogenase, mitochondrial OS=Homo sapiens GN=ACADVL|Isoform 3 of Very long-chain specific acyl-CoA dehydrogenase, mitochondrial OS=Homo sapiens GN=ACADVL	2	1	1	1	1	8	8	8	2	2	2	8	8	6	6.36915	6.79377	5.94453	TRUE	TRUE	TRUE	0.426186507	25.6467425	1.621251604	0.134322359	0.42960324	-5.034269311	0.42808797	1	1	FA_8_3_UV - FA_8_3_noUV	Huh7	limma	0.134322359	0.42960324	FALSE	no hit	6.79377
WDR75	Q8IWA0	WD repeat-containing protein 75 OS=Homo sapiens GN=WDR75 PE=1 SV=1	1	1	NA	1	NA	8	8	NA	2	2	NA	2	2	NA	6.37745	6.37745	NA	TRUE	FALSE	TRUE	0.358762176	22.93426722	1.618939814	0.134821697	0.429982193	-5.037411246	0.428746908	1	1	FA_8_3_UV - FA_8_3_noUV	Huh7	limma	0.134821697	0.429982193	FALSE	no hit	6.37745
ACADM	P11310|P11310-2|Q5T4U5	Medium-chain specific acyl-CoA dehydrogenase, mitochondrial OS=Homo sapiens GN=ACADM PE=1 SV=1|Isoform 2 of Medium-chain specific acyl-CoA dehydrogenase, mitochondrial OS=Homo sapiens GN=ACADM|Acyl-Coenzyme A dehydrogenase, C-4 to C-12 straight chain, isoform CRA_a OS=Homo sapiens GN=ACADM PE=1 SV=1	2	1	1	1	1	8	8	8	2	2	2	19	10	19	7.74674	7.49956	7.99392	TRUE	TRUE	TRUE	-0.173270315	25.21878506	-1.6164129	0.13536938	0.43051276	-5.040842546	0.429467838	1	1	FA_8_3_UV - FA_8_3_noUV	Huh7	limma	0.13536938	0.43051276	FALSE	no hit	7.49956
DDX18	Q9NVP1	ATP-dependent RNA helicase DDX18 OS=Homo sapiens GN=DDX18 PE=1 SV=2	2	1	1	1	1	8	8	8	2	2	2	4	4	2	6.489145	6.56017	6.41812	TRUE	TRUE	TRUE	0.236739735	24.20431507	1.612991211	0.136114132	0.431665324	-5.045483844	0.430445169	1	1	FA_8_3_UV - FA_8_3_noUV	Huh7	limma	0.136114132	0.431665324	FALSE	no hit	6.56017
HNRNPA1	F8W6I7|P09651|P09651-2|P09651-3	Heterogeneous nuclear ribonucleoprotein A1 OS=Homo sapiens GN=HNRNPA1 PE=1 SV=2|Heterogeneous nuclear ribonucleoprotein A1 OS=Homo sapiens GN=HNRNPA1 PE=1 SV=5|Isoform A1-A of Heterogeneous nuclear ribonucleoprotein A1 OS=Homo sapiens GN=HNRNPA1|Isoform 2 of Heterogeneous nuclear ribonucleoprotein A1 OS=Homo sapiens GN=HNRNPA1	2	1	1	1	1	8	8	8	2	2	2	8	5	8	7.139445	7.56628	6.71261	TRUE	TRUE	TRUE	0.263004497	25.9474583	1.607922006	0.137224135	0.433104661	-5.052349242	0.431895448	1	1	FA_8_3_UV - FA_8_3_noUV	Huh7	limma	0.137224135	0.433104661	FALSE	no hit	7.56628
ARID1A	H0Y488|O14497|O14497-2|O14497-3	AT-rich interactive domain-containing protein 1A (Fragment) OS=Homo sapiens GN=ARID1A PE=1 SV=1|AT-rich interactive domain-containing protein 1A OS=Homo sapiens GN=ARID1A PE=1 SV=3|Isoform 2 of AT-rich interactive domain-containing protein 1A OS=Homo sapiens GN=ARID1A|Isoform 3 of AT-rich interactive domain-containing protein 1A OS=Homo sapiens GN=ARID1A	1	1	NA	1	NA	8	8	NA	2	2	NA	3	3	NA	6.29964	6.29964	NA	TRUE	FALSE	TRUE	0.337215582	23.91902931	1.607416674	0.137335225	0.433104661	-5.053032931	0.432040176	1	1	FA_8_3_UV - FA_8_3_noUV	Huh7	limma	0.137335225	0.433104661	FALSE	no hit	6.29964
PSMD2	Q13200	26S proteasome non-ATPase regulatory subunit 2 OS=Homo sapiens GN=PSMD2 PE=1 SV=3	2	1	1	1	1	8	8	8	2	2	2	13	13	4	6.89563	7.44793	6.34333	TRUE	TRUE	TRUE	-0.234091864	26.42115381	-1.600412621	0.138883157	0.435397137	-5.06249597	0.434049047	1	1	FA_8_3_UV - FA_8_3_noUV	Huh7	limma	0.138883157	0.435397137	FALSE	no hit	7.44793
GLS	O94925-3	Isoform 3 of Glutaminase kidney isoform, mitochondrial OS=Homo sapiens GN=GLS	2	1	1	1	1	8	8	8	2	2	2	12	12	3	6.722785	7.32771	6.11786	TRUE	TRUE	TRUE	0.408027769	26.03441667	1.596997195	0.139643551	0.435397137	-5.067101589	0.435030599	1	1	FA_8_3_UV - FA_8_3_noUV	Huh7	limma	0.139643551	0.435397137	FALSE	no hit	7.32771
MRPS23	Q9Y3D9	28S ribosomal protein S23, mitochondrial OS=Homo sapiens GN=MRPS23 PE=1 SV=2	1	1	NA	1	NA	8	8	NA	2	2	NA	2	2	NA	6.44787	6.44787	NA	TRUE	FALSE	TRUE	0.146539759	22.73990643	1.595027571	0.140083724	0.435397137	-5.069754917	0.435597226	1	1	FA_8_3_UV - FA_8_3_noUV	Huh7	limma	0.140083724	0.435397137	FALSE	no hit	6.44787
PCCB	C9JQS9|E7ETT1|E7ETT4|E7EUY3|E7EX59|E9PDR0|E9PEC3|P05166|P05166-2	Propionyl-CoA carboxylase beta chain, mitochondrial OS=Homo sapiens GN=PCCB PE=1 SV=1|Propionyl-CoA carboxylase beta chain, mitochondrial OS=Homo sapiens GN=PCCB PE=1 SV=1|Propionyl-CoA carboxylase beta chain, mitochondrial OS=Homo sapiens GN=PCCB PE=1 SV=1|Propionyl-CoA carboxylase beta chain, mitochondrial OS=Homo sapiens GN=PCCB PE=1 SV=1|Propionyl-CoA carboxylase beta chain, mitochondrial OS=…	1	1	NA	1	NA	8	8	NA	2	2	NA	9	9	NA	6.76201	6.76201	NA	TRUE	FALSE	TRUE	0.197107872	25.1067443	1.593860579	0.140345102	0.435397137	-5.07132608	0.435933151	1	1	FA_8_3_UV - FA_8_3_noUV	Huh7	limma	0.140345102	0.435397137	FALSE	no hit	6.76201
PRMT5	O14744|O14744-2|O14744-3|O14744-5	Protein arginine N-methyltransferase 5 OS=Homo sapiens GN=PRMT5 PE=1 SV=4|Isoform 2 of Protein arginine N-methyltransferase 5 OS=Homo sapiens GN=PRMT5|Isoform 3 of Protein arginine N-methyltransferase 5 OS=Homo sapiens GN=PRMT5|Isoform 5 of Protein arginine N-methyltransferase 5 OS=Homo sapiens GN=PRMT5	1	1	NA	1	NA	8	8	NA	2	2	NA	4	4	NA	6.84579	6.84579	NA	TRUE	FALSE	TRUE	-0.217645185	24.5643371	-1.592846426	0.140572595	0.435397137	-5.072690912	0.436225202	1	1	FA_8_3_UV - FA_8_3_noUV	Huh7	limma	0.140572595	0.435397137	FALSE	no hit	6.84579
TPR	P12270	Nucleoprotein TPR OS=Homo sapiens GN=TPR PE=1 SV=3	2	1	1	1	1	8	8	8	2	2	2	13	7	13	6.664425	6.71366	6.61519	TRUE	TRUE	TRUE	0.173315288	24.92379368	1.591774367	0.140813431	0.435397137	-5.074133111	0.43653405	1	1	FA_8_3_UV - FA_8_3_noUV	Huh7	limma	0.140813431	0.435397137	FALSE	no hit	6.71366
EIF5B	A0A087WUT6|O60841	Eukaryotic translation initiation factor 5B OS=Homo sapiens GN=EIF5B PE=1 SV=1|Eukaryotic translation initiation factor 5B OS=Homo sapiens GN=EIF5B PE=1 SV=4	1	1	NA	1	NA	8	8	NA	2	2	NA	3	3	NA	6.80763	6.80763	NA	TRUE	FALSE	TRUE	-0.206334594	23.74261487	-1.591319153	0.140915804	0.435397137	-5.074745317	0.436665231	1	1	FA_8_3_UV - FA_8_3_noUV	Huh7	limma	0.140915804	0.435397137	FALSE	no hit	6.80763
IMPDH2	H0Y4R1|P12268	Inosine-5'-monophosphate dehydrogenase 2 (Fragment) OS=Homo sapiens GN=IMPDH2 PE=1 SV=1|Inosine-5'-monophosphate dehydrogenase 2 OS=Homo sapiens GN=IMPDH2 PE=1 SV=2	1	1	NA	1	NA	8	8	NA	2	2	NA	7	7	NA	6.96217	6.96217	NA	TRUE	FALSE	TRUE	-0.348500355	25.03159468	-1.590290653	0.141147345	0.435397137	-5.076128136	0.4369617	1	1	FA_8_3_UV - FA_8_3_noUV	Huh7	limma	0.141147345	0.435397137	FALSE	no hit	6.96217
CDC5L	Q99459	Cell division cycle 5-like protein OS=Homo sapiens GN=CDC5L PE=1 SV=2	2	1	1	1	1	8	8	8	2	2	2	3	3	2	6.136395	6.2389	6.03389	TRUE	TRUE	TRUE	0.281572058	23.87773193	1.586681565	0.141962489	0.436022996	-5.080976323	0.438002951	1	1	FA_8_3_UV - FA_8_3_noUV	Huh7	limma	0.141962489	0.436022996	FALSE	no hit	6.2389
EIF5	P55010	Eukaryotic translation initiation factor 5 OS=Homo sapiens GN=EIF5 PE=1 SV=2	1	1	NA	1	NA	8	8	NA	2	2	NA	3	3	NA	6.64222	6.64222	NA	TRUE	FALSE	TRUE	-0.307349779	23.55849817	-1.584036513	0.142562524	0.436022996	-5.084525302	0.438766975	1	1	FA_8_3_UV - FA_8_3_noUV	Huh7	limma	0.142562524	0.436022996	FALSE	no hit	6.64222
TALDO1	P37837	Transaldolase OS=Homo sapiens GN=TALDO1 PE=1 SV=2	2	1	1	1	1	8	8	8	2	2	2	9	5	9	7.00869	7.06916	6.94822	TRUE	TRUE	TRUE	-0.532257464	25.25832837	-1.583541973	0.142674958	0.436022996	-5.085188452	0.438909908	1	1	FA_8_3_UV - FA_8_3_noUV	Huh7	limma	0.142674958	0.436022996	FALSE	no hit	7.06916
PEBP1	P30086	Phosphatidylethanolamine-binding protein 1 OS=Homo sapiens GN=PEBP1 PE=1 SV=3	2	1	1	1	1	8	8	8	2	2	2	3	2	3	6.310345	6.28098	6.33971	TRUE	TRUE	TRUE	-0.450468011	22.84302931	-1.580798339	0.143300144	0.436022996	-5.088865255	0.439703365	1	1	FA_8_3_UV - FA_8_3_noUV	Huh7	limma	0.143300144	0.436022996	FALSE	no hit	6.28098
PARN	O95453|O95453-2	Poly(A)-specific ribonuclease PARN OS=Homo sapiens GN=PARN PE=1 SV=1|Isoform 2 of Poly(A)-specific ribonuclease PARN OS=Homo sapiens GN=PARN	1	1	NA	1	NA	8	8	NA	2	2	NA	3	3	NA	6.47745	6.47745	NA	TRUE	FALSE	TRUE	0.248295528	24.27743143	1.579550263	0.143585336	0.436022996	-5.090536558	0.44006458	1	1	FA_8_3_UV - FA_8_3_noUV	Huh7	limma	0.143585336	0.436022996	FALSE	no hit	6.47745
ST13|ST13P4	A0A087X1H6|F6VDH7|H7C3I1|P50502|Q3KNR6|Q8IZP2	Hsc70-interacting protein OS=Homo sapiens GN=ST13 PE=1 SV=1|Hsc70-interacting protein (Fragment) OS=Homo sapiens GN=ST13 PE=1 SV=1|Hsc70-interacting protein (Fragment) OS=Homo sapiens GN=ST13 PE=1 SV=1|Hsc70-interacting protein OS=Homo sapiens GN=ST13 PE=1 SV=2|Hsc70-interacting protein OS=Homo sapiens GN=ST13 PE=1 SV=1|Putative protein FAM10A4 OS=Homo sapiens GN=ST13P4 PE=5 SV=1	1	1	NA	1	NA	8	8	NA	2	2	NA	4	4	NA	6.64973	6.64973	NA	TRUE	FALSE	TRUE	-0.315849574	24.67260472	-1.579191303	0.143667453	0.436022996	-5.091017095	0.4401685	1	1	FA_8_3_UV - FA_8_3_noUV	Huh7	limma	0.143667453	0.436022996	FALSE	no hit	6.64973
GLDC	P23378	Glycine dehydrogenase (decarboxylating), mitochondrial OS=Homo sapiens GN=GLDC PE=1 SV=2	1	1	NA	1	NA	8	8	NA	2	2	NA	6	6	NA	6.74661	6.74661	NA	TRUE	FALSE	TRUE	0.202490746	24.70432284	1.566780674	0.146532006	0.443524491	-5.107590514	0.443770088	1	1	FA_8_3_UV - FA_8_3_noUV	Huh7	limma	0.146532006	0.443524491	FALSE	no hit	6.74661
PCBP1	Q15365	Poly(rC)-binding protein 1 OS=Homo sapiens GN=PCBP1 PE=1 SV=2	2	1	1	1	1	8	8	8	2	2	2	5	5	5	6.83042	7.05388	6.60696	TRUE	TRUE	TRUE	-0.188562681	24.336631	-1.559129809	0.148322771	0.446980532	-5.117768056	0.445998742	1	1	FA_8_3_UV - FA_8_3_noUV	Huh7	limma	0.148322771	0.446980532	FALSE	no hit	7.05388
MPHOSPH8	Q99549|Q99549-2	M-phase phosphoprotein 8 OS=Homo sapiens GN=MPHOSPH8 PE=1 SV=2|Isoform 2 of M-phase phosphoprotein 8 OS=Homo sapiens GN=MPHOSPH8	1	1	NA	1	NA	8	8	NA	2	2	NA	2	2	NA	5.66366	5.66366	NA	TRUE	FALSE	TRUE	0.268807733	22.83372118	1.558522932	0.148465633	0.446980532	-5.118574052	0.446175795	1	1	FA_8_3_UV - FA_8_3_noUV	Huh7	limma	0.148465633	0.446980532	FALSE	no hit	5.66366
CAPN2	P17655	Calpain-2 catalytic subunit OS=Homo sapiens GN=CAPN2 PE=1 SV=6	1	1	NA	1	NA	8	8	NA	2	2	NA	7	7	NA	7.18214	7.18214	NA	TRUE	FALSE	TRUE	-0.357541341	25.4686576	-1.556604555	0.148918021	0.447150122	-5.121120594	0.446735732	1	1	FA_8_3_UV - FA_8_3_noUV	Huh7	limma	0.148918021	0.447150122	FALSE	no hit	7.18214
ACO2	A2A274|Q99798	Aconitate hydratase, mitochondrial OS=Homo sapiens GN=ACO2 PE=1 SV=1|Aconitate hydratase, mitochondrial OS=Homo sapiens GN=ACO2 PE=1 SV=2	2	1	1	1	1	8	8	8	2	2	2	15	15	6	7.03934	7.89217	6.18651	TRUE	TRUE	TRUE	0.22661885	26.76701058	1.552458861	0.14989977	0.448904086	-5.126617223	0.447947144	1	1	FA_8_3_UV - FA_8_3_noUV	Huh7	limma	0.14989977	0.448904086	FALSE	no hit	7.89217
CTSL	P07711	Cathepsin L1 OS=Homo sapiens GN=CTSL PE=1 SV=2	2	1	1	1	1	8	8	8	2	2	2	3	3	2	7.23338	7.33331	7.13345	TRUE	TRUE	TRUE	0.170315841	24.3035196	1.544007232	0.151918737	0.450844222	-5.137795035	0.450422565	1	1	FA_8_3_UV - FA_8_3_noUV	Huh7	limma	0.151918737	0.450844222	FALSE	no hit	7.33331
RAN	B5MDF5|P62826	GTP-binding nuclear protein Ran OS=Homo sapiens GN=RAN PE=1 SV=1|GTP-binding nuclear protein Ran OS=Homo sapiens GN=RAN PE=1 SV=3	2	1	1	1	1	8	8	8	2	2	2	7	7	6	7.317945	7.60395	7.03194	TRUE	TRUE	TRUE	-0.240587109	25.65195822	-1.542506637	0.152279676	0.450844222	-5.139775736	0.450862887	1	1	FA_8_3_UV - FA_8_3_noUV	Huh7	limma	0.152279676	0.450844222	FALSE	no hit	7.60395
DDX39B	Q13838|Q13838-2	Spliceosome RNA helicase DDX39B OS=Homo sapiens GN=DDX39B PE=1 SV=1|Isoform 2 of Spliceosome RNA helicase DDX39B OS=Homo sapiens GN=DDX39B	2	1	1	1	1	8	8	8	2	2	2	3	2	3	6.78733	6.88636	6.6883	TRUE	TRUE	TRUE	0.32407381	22.72371696	1.542171377	0.152360419	0.450844222	-5.140218098	0.450961296	1	1	FA_8_3_UV - FA_8_3_noUV	Huh7	limma	0.152360419	0.450844222	FALSE	no hit	6.88636
SMU1	Q2TAY7	WD40 repeat-containing protein SMU1 OS=Homo sapiens GN=SMU1 PE=1 SV=2	1	1	NA	1	NA	8	8	NA	2	2	NA	6	6	NA	7.25757	7.25757	NA	TRUE	FALSE	TRUE	0.229760515	24.76683053	1.540633941	0.152731165	0.450844222	-5.142245922	0.451412737	1	1	FA_8_3_UV - FA_8_3_noUV	Huh7	limma	0.152731165	0.450844222	FALSE	no hit	7.25757
CYB5R3	P00387|P00387-2|P00387-3	NADH-cytochrome b5 reductase 3 OS=Homo sapiens GN=CYB5R3 PE=1 SV=3|Isoform 2 of NADH-cytochrome b5 reductase 3 OS=Homo sapiens GN=CYB5R3|Isoform 3 of NADH-cytochrome b5 reductase 3 OS=Homo sapiens GN=CYB5R3	1	1	NA	1	NA	8	8	NA	2	2	NA	2	2	NA	6.11241	6.11241	NA	TRUE	FALSE	TRUE	0.333111132	22.68479323	1.540213782	0.152832622	0.450844222	-5.142799878	0.451536154	1	1	FA_8_3_UV - FA_8_3_noUV	Huh7	limma	0.152832622	0.450844222	FALSE	no hit	6.11241
CWC22	B7WP74|Q9HCG8	Pre-mRNA-splicing factor CWC22 homolog (Fragment) OS=Homo sapiens GN=CWC22 PE=1 SV=1|Pre-mRNA-splicing factor CWC22 homolog OS=Homo sapiens GN=CWC22 PE=1 SV=3	1	1	NA	1	NA	8	8	NA	2	2	NA	2	2	NA	6.38452	6.38452	NA	TRUE	FALSE	TRUE	0.258295147	23.45348566	1.539494393	0.15300647	0.450844222	-5.143748138	0.45174751	1	1	FA_8_3_UV - FA_8_3_noUV	Huh7	limma	0.15300647	0.450844222	FALSE	no hit	6.38452
SYMPK	A0A087WUE9|Q92797	Symplekin OS=Homo sapiens GN=SYMPK PE=1 SV=1|Symplekin OS=Homo sapiens GN=SYMPK PE=1 SV=2	1	1	NA	1	NA	8	8	NA	2	2	NA	2	2	NA	6.04328	6.04328	NA	TRUE	FALSE	TRUE	0.499543496	23.04697862	1.537431231	0.153506012	0.450844222	-5.146466164	0.452353977	1	1	FA_8_3_UV - FA_8_3_noUV	Huh7	limma	0.153506012	0.450844222	FALSE	no hit	6.04328
CLUH	K7EIG1	Clustered mitochondria protein homolog (Fragment) OS=Homo sapiens GN=CLUH PE=1 SV=2	1	1	NA	1	NA	8	8	NA	2	2	NA	3	3	NA	6.08597	6.08597	NA	TRUE	FALSE	TRUE	-0.166331747	23.2906275	-1.536457484	0.153742272	0.450844222	-5.1477482	0.452640369	1	1	FA_8_3_UV - FA_8_3_noUV	Huh7	limma	0.153742272	0.450844222	FALSE	no hit	6.08597
NXF1	E9PIN3|Q9UBU9	Nuclear RNA export factor 1 (Fragment) OS=Homo sapiens GN=NXF1 PE=1 SV=1|Nuclear RNA export factor 1 OS=Homo sapiens GN=NXF1 PE=1 SV=1	1	1	NA	1	NA	8	8	NA	2	2	NA	3	3	NA	5.8588	5.8588	NA	TRUE	FALSE	TRUE	0.432170994	23.77810847	1.530690291	0.155148069	0.451877343	-5.155330961	0.454338679	1	1	FA_8_3_UV - FA_8_3_noUV	Huh7	limma	0.155148069	0.451877343	FALSE	no hit	5.8588
NOP58	Q9Y2X3	Nucleolar protein 58 OS=Homo sapiens GN=NOP58 PE=1 SV=1	2	1	1	1	1	8	8	8	2	2	2	5	5	3	6.59559	6.87853	6.31265	TRUE	TRUE	TRUE	0.240910065	24.68758996	1.530661782	0.155155046	0.451877343	-5.155368401	0.454347084	1	1	FA_8_3_UV - FA_8_3_noUV	Huh7	limma	0.155155046	0.451877343	FALSE	no hit	6.87853
EIF4A2	E7EQG2|Q14240|Q14240-2	Eukaryotic initiation factor 4A-II OS=Homo sapiens GN=EIF4A2 PE=1 SV=1|Eukaryotic initiation factor 4A-II OS=Homo sapiens GN=EIF4A2 PE=1 SV=2|Isoform 2 of Eukaryotic initiation factor 4A-II OS=Homo sapiens GN=EIF4A2	2	1	1	1	1	8	8	8	2	2	2	5	4	5	6.68209	7.02939	6.33479	TRUE	TRUE	TRUE	-0.315122231	24.50060015	-1.530088863	0.155295314	0.451877343	-5.156120703	0.454515993	1	1	FA_8_3_UV - FA_8_3_noUV	Huh7	limma	0.155295314	0.451877343	FALSE	no hit	7.02939
SOD2	A0A0C4DFU2|F5GYZ5|F5H3C5|F5H4R2|P04179|P04179-4	Superoxide dismutase OS=Homo sapiens GN=SOD2 PE=1 SV=1|Superoxide dismutase (Fragment) OS=Homo sapiens GN=SOD2 PE=1 SV=1|Superoxide dismutase (Fragment) OS=Homo sapiens GN=SOD2 PE=1 SV=1|Superoxide dismutase (Fragment) OS=Homo sapiens GN=SOD2 PE=1 SV=1|Superoxide dismutase [Mn], mitochondrial OS=Homo sapiens GN=SOD2 PE=1 SV=2|Isoform 4 of Superoxide dismutase [Mn], mitochondrial OS=Homo sapiens G…	2	1	1	1	1	8	8	8	2	2	2	3	3	3	6.803965	7.03246	6.57547	TRUE	TRUE	TRUE	0.4345791	24.94136061	1.524267727	0.156726761	0.452569475	-5.163754506	0.456234202	1	1	FA_8_3_UV - FA_8_3_noUV	Huh7	limma	0.156726761	0.452569475	FALSE	no hit	7.03246
PABPC4	B1ANR0|Q13310|Q13310-2|Q13310-3	Polyadenylate-binding protein OS=Homo sapiens GN=PABPC4 PE=1 SV=1|Polyadenylate-binding protein 4 OS=Homo sapiens GN=PABPC4 PE=1 SV=1|Isoform 2 of Polyadenylate-binding protein 4 OS=Homo sapiens GN=PABPC4|Isoform 3 of Polyadenylate-binding protein 4 OS=Homo sapiens GN=PABPC4	2	1	1	1	1	8	8	8	2	2	2	12	4	12	6.77821	6.6629	6.89352	TRUE	TRUE	TRUE	-0.227999026	24.7355929	-1.524065233	0.156776761	0.452569475	-5.164019728	0.456294037	1	1	FA_8_3_UV - FA_8_3_noUV	Huh7	limma	0.156776761	0.452569475	FALSE	no hit	6.6629
SMC1A	Q14683	Structural maintenance of chromosomes protein 1A OS=Homo sapiens GN=SMC1A PE=1 SV=2	1	1	NA	1	NA	8	8	NA	2	2	NA	3	3	NA	5.95306	5.95306	NA	TRUE	FALSE	TRUE	0.271406638	23.39170228	1.52227861	0.157218516	0.452569475	-5.166358855	0.45682216	1	1	FA_8_3_UV - FA_8_3_noUV	Huh7	limma	0.157218516	0.452569475	FALSE	no hit	5.95306
DDX27	B7Z6D5|Q96GQ7	Probable ATP-dependent RNA helicase DDX27 OS=Homo sapiens GN=DDX27 PE=1 SV=1|Probable ATP-dependent RNA helicase DDX27 OS=Homo sapiens GN=DDX27 PE=1 SV=2	1	1	NA	1	NA	8	8	NA	2	2	NA	2	2	NA	5.66545	5.66545	NA	TRUE	FALSE	TRUE	0.201444362	22.17471652	1.521583641	0.157390644	0.452569475	-5.167268277	0.457027685	1	1	FA_8_3_UV - FA_8_3_noUV	Huh7	limma	0.157390644	0.452569475	FALSE	no hit	5.66545
PPP2R2A	P63151|P63151-2	Serine/threonine-protein phosphatase 2A 55 kDa regulatory subunit B alpha isoform OS=Homo sapiens GN=PPP2R2A PE=1 SV=1|Isoform 2 of Serine/threonine-protein phosphatase 2A 55 kDa regulatory subunit B alpha isoform OS=Homo sapiens GN=PPP2R2A	1	1	NA	1	NA	8	8	NA	2	2	NA	3	3	NA	6.28463	6.28463	NA	TRUE	FALSE	TRUE	-0.357550754	23.96691811	-1.516163188	0.158738784	0.452569475	-5.174352426	0.458632468	1	1	FA_8_3_UV - FA_8_3_noUV	Huh7	limma	0.158738784	0.452569475	FALSE	no hit	6.28463
RAB2A|DKFZp313C1541|RAB2B	E9PKL7|P61019|Q5HYI5|Q8WUD1	Ras-related protein Rab-2A OS=Homo sapiens GN=RAB2A PE=1 SV=1|Ras-related protein Rab-2A OS=Homo sapiens GN=RAB2A PE=1 SV=1|Putative uncharacterized protein DKFZp313C1541 OS=Homo sapiens GN=DKFZp313C1541 PE=1 SV=1|Ras-related protein Rab-2B OS=Homo sapiens GN=RAB2B PE=1 SV=1	1	1	NA	1	NA	8	8	NA	2	2	NA	2	2	NA	5.96424	5.96424	NA	TRUE	FALSE	TRUE	0.207166239	22.79053064	1.515420726	0.158924222	0.452569475	-5.175321535	0.458852527	1	1	FA_8_3_UV - FA_8_3_noUV	Huh7	limma	0.158924222	0.452569475	FALSE	no hit	5.96424
NOL11	Q9H8H0	Nucleolar protein 11 OS=Homo sapiens GN=NOL11 PE=1 SV=1	1	1	NA	1	NA	8	8	NA	2	2	NA	6	6	NA	6.70979	6.70979	NA	TRUE	FALSE	TRUE	0.188109255	24.73150765	1.511858118	0.159816636	0.452569475	-5.179967529	0.459909277	1	1	FA_8_3_UV - FA_8_3_noUV	Huh7	limma	0.159816636	0.452569475	FALSE	no hit	6.70979
EPS15L1	M0R165|M0R2S2|Q9UBC2|Q9UBC2-2|Q9UBC2-3|Q9UBC2-4	Epidermal growth factor receptor substrate 15-like 1 OS=Homo sapiens GN=EPS15L1 PE=1 SV=1|Isoform 2 of Epidermal growth factor receptor substrate 15-like 1 OS=Homo sapiens GN=EPS15L1|Isoform 3 of Epidermal growth factor receptor substrate 15-like 1 OS=Homo sapiens GN=EPS15L1|Isoform 4 of Epidermal growth factor receptor substrate 15-like 1 OS=Homo sapiens GN=EPS15L1	2	1	1	1	1	8	8	8	2	2	2	2	2	2	5.88647	5.88734	5.8856	TRUE	TRUE	TRUE	-0.269067419	22.97969106	-1.511515079	0.159902794	0.452569475	-5.180414523	0.460011102	1	1	FA_8_3_UV - FA_8_3_noUV	Huh7	limma	0.159902794	0.452569475	FALSE	no hit	5.88734
AKR1A1	P14550	Alcohol dehydrogenase [NADP(+)] OS=Homo sapiens GN=AKR1A1 PE=1 SV=3	2	1	1	1	1	8	8	8	2	2	2	4	4	3	6.29071	6.4238	6.15762	TRUE	TRUE	TRUE	-0.398216698	24.02464232	-1.510852129	0.160069415	0.452569475	-5.181278192	0.460207923	1	1	FA_8_3_UV - FA_8_3_noUV	Huh7	limma	0.160069415	0.452569475	FALSE	no hit	6.4238
RPL30	E5RI99|P62888	60S ribosomal protein L30 (Fragment) OS=Homo sapiens GN=RPL30 PE=1 SV=1|60S ribosomal protein L30 OS=Homo sapiens GN=RPL30 PE=1 SV=2	2	1	1	1	1	8	8	8	2	2	2	4	3	4	6.48308	6.43178	6.53438	TRUE	TRUE	TRUE	-0.156647385	23.71905338	-1.510804905	0.16008129	0.452569475	-5.181339704	0.460221944	1	1	FA_8_3_UV - FA_8_3_noUV	Huh7	limma	0.16008129	0.452569475	FALSE	no hit	6.43178
OGDH	A0A0D9SFS3|Q02218	2-oxoglutarate dehydrogenase, mitochondrial OS=Homo sapiens GN=OGDH PE=1 SV=1|2-oxoglutarate dehydrogenase, mitochondrial OS=Homo sapiens GN=OGDH PE=1 SV=3	1	1	NA	1	NA	8	8	NA	2	2	NA	17	17	NA	7.45294	7.45294	NA	TRUE	FALSE	TRUE	0.17509146	26.85066041	1.508856823	0.160571809	0.452569475	-5.183876167	0.460800585	1	1	FA_8_3_UV - FA_8_3_noUV	Huh7	limma	0.160571809	0.452569475	FALSE	no hit	7.45294
HECTD1	A0A087X2H1|Q9ULT8	E3 ubiquitin-protein ligase HECTD1 OS=Homo sapiens GN=HECTD1 PE=1 SV=1|E3 ubiquitin-protein ligase HECTD1 OS=Homo sapiens GN=HECTD1 PE=1 SV=3	1	1	NA	1	NA	8	8	NA	2	2	NA	6	6	NA	6.29016	6.29016	NA	TRUE	FALSE	TRUE	-0.180064436	24.19212482	-1.508667937	0.160619439	0.452569475	-5.184121993	0.460856712	1	1	FA_8_3_UV - FA_8_3_noUV	Huh7	limma	0.160619439	0.452569475	FALSE	no hit	6.29016
CHD8|CHD9|CHD7	H0YJG4|Q3L8U1|Q3L8U1-2|Q3L8U1-3|Q9HCK8|Q9HCK8-2|Q9P2D1	Chromodomain-helicase-DNA-binding protein 8 (Fragment) OS=Homo sapiens GN=CHD8 PE=1 SV=1|Chromodomain-helicase-DNA-binding protein 9 OS=Homo sapiens GN=CHD9 PE=1 SV=2|Isoform 2 of Chromodomain-helicase-DNA-binding protein 9 OS=Homo sapiens GN=CHD9|Isoform 3 of Chromodomain-helicase-DNA-binding protein 9 OS=Homo sapiens GN=CHD9|Chromodomain-helicase-DNA-binding protein 8 OS=Homo sapiens GN=CHD8 PE…	1	1	NA	1	NA	8	8	NA	2	2	NA	2	2	NA	5.4121	5.4121	NA	TRUE	FALSE	TRUE	0.417157327	24.59778035	1.507915094	0.160809399	0.452569475	-5.185101587	0.461080453	1	1	FA_8_3_UV - FA_8_3_noUV	Huh7	limma	0.160809399	0.452569475	FALSE	no hit	5.4121
IARS	J3KR24|P41252	Isoleucine--tRNA ligase, cytoplasmic OS=Homo sapiens GN=IARS PE=1 SV=1|Isoleucine--tRNA ligase, cytoplasmic OS=Homo sapiens GN=IARS PE=1 SV=2	1	1	NA	1	NA	8	8	NA	2	2	NA	12	12	NA	7.31184	7.31184	NA	TRUE	FALSE	TRUE	-0.154461102	25.90136581	-1.506586145	0.161145199	0.452569475	-5.186830053	0.461475559	1	1	FA_8_3_UV - FA_8_3_noUV	Huh7	limma	0.161145199	0.452569475	FALSE	no hit	7.31184
DDX5	J3KTA4|P17844|P17844-2	Probable ATP-dependent RNA helicase DDX5 OS=Homo sapiens GN=DDX5 PE=1 SV=1|Probable ATP-dependent RNA helicase DDX5 OS=Homo sapiens GN=DDX5 PE=1 SV=1|Isoform 2 of Probable ATP-dependent RNA helicase DDX5 OS=Homo sapiens GN=DDX5	2	1	1	1	1	8	8	8	2	2	2	7	7	5	6.812705	7.09345	6.53196	TRUE	TRUE	TRUE	0.307682649	26.04588162	1.50451065	0.161670849	0.452919079	-5.189527568	0.462092997	1	1	FA_8_3_UV - FA_8_3_noUV	Huh7	limma	0.161670849	0.452919079	FALSE	no hit	7.09345
CSDE1	E9PLT0|O75534|O75534-2|O75534-3|O75534-4	Cold shock domain-containing protein E1 OS=Homo sapiens GN=CSDE1 PE=1 SV=1|Cold shock domain-containing protein E1 OS=Homo sapiens GN=CSDE1 PE=1 SV=2|Isoform 2 of Cold shock domain-containing protein E1 OS=Homo sapiens GN=CSDE1|Isoform 3 of Cold shock domain-containing protein E1 OS=Homo sapiens GN=CSDE1|Isoform 4 of Cold shock domain-containing protein E1 OS=Homo sapiens GN=CSDE1	2	1	1	1	1	8	8	8	2	2	2	4	4	2	6.26869	6.73131	5.80607	TRUE	TRUE	TRUE	-0.169603932	24.67228758	-1.501843267	0.162348582	0.453260648	-5.1929909	0.462887192	1	1	FA_8_3_UV - FA_8_3_noUV	Huh7	limma	0.162348582	0.453260648	FALSE	no hit	6.73131
ETHE1	M0QXB5|O95571	Persulfide dioxygenase ETHE1, mitochondrial OS=Homo sapiens GN=ETHE1 PE=1 SV=1|Persulfide dioxygenase ETHE1, mitochondrial OS=Homo sapiens GN=ETHE1 PE=1 SV=2	2	1	1	1	1	8	8	8	2	2	2	4	2	4	6.68348	7.04322	6.32374	TRUE	TRUE	TRUE	0.168334147	23.34100177	1.499749559	0.162882272	0.453260648	-5.195706642	0.463511112	1	1	FA_8_3_UV - FA_8_3_noUV	Huh7	limma	0.162882272	0.453260648	FALSE	no hit	7.04322
COLGALT1	Q8NBJ5	Procollagen galactosyltransferase 1 OS=Homo sapiens GN=COLGALT1 PE=1 SV=1	2	1	1	1	1	8	8	8	2	2	2	8	8	7	6.699915	7.18104	6.21879	TRUE	TRUE	TRUE	0.192100103	25.93749386	1.49929952	0.162997186	0.453260648	-5.196290072	0.463645284	1	1	FA_8_3_UV - FA_8_3_noUV	Huh7	limma	0.162997186	0.453260648	FALSE	no hit	7.18104
RPS14	P62263	40S ribosomal protein S14 OS=Homo sapiens GN=RPS14 PE=1 SV=3	2	1	1	1	1	8	8	8	2	2	2	3	3	3	6.65208	6.85829	6.44587	TRUE	TRUE	TRUE	-0.17016154	24.10906959	-1.490925585	0.165148205	0.457575275	-5.207125704	0.466145777	1	1	FA_8_3_UV - FA_8_3_noUV	Huh7	limma	0.165148205	0.457575275	FALSE	no hit	6.85829
NDUFAF7	Q7L592|Q7L592-2	NADH dehydrogenase [ubiquinone] complex I, assembly factor 7 OS=Homo sapiens GN=NDUFAF7 PE=1 SV=1|Isoform 2 of NADH dehydrogenase [ubiquinone] complex I, assembly factor 7 OS=Homo sapiens GN=NDUFAF7	1	1	NA	1	NA	8	8	NA	2	2	NA	2	2	NA	6.31094	6.31094	NA	TRUE	FALSE	TRUE	0.178537181	23.54317048	1.490108653	0.165359355	0.457575275	-5.208180718	0.466390117	1	1	FA_8_3_UV - FA_8_3_noUV	Huh7	limma	0.165359355	0.457575275	FALSE	no hit	6.31094
NAPA	P54920	Alpha-soluble NSF attachment protein OS=Homo sapiens GN=NAPA PE=1 SV=3	1	1	NA	1	NA	8	8	NA	2	2	NA	2	2	NA	5.53346	5.53346	NA	TRUE	FALSE	TRUE	0.203926218	22.22075862	1.487416056	0.166056954	0.457880573	-5.211655416	0.46719596	1	1	FA_8_3_UV - FA_8_3_noUV	Huh7	limma	0.166056954	0.457880573	FALSE	no hit	5.53346
ATP5C1	P36542|P36542-2	ATP synthase subunit gamma, mitochondrial OS=Homo sapiens GN=ATP5C1 PE=1 SV=1|Isoform Heart of ATP synthase subunit gamma, mitochondrial OS=Homo sapiens GN=ATP5C1	2	1	1	1	1	8	8	8	2	2	2	3	2	3	6.42228	6.73935	6.10521	TRUE	TRUE	TRUE	0.246054181	23.36083913	1.485363103	0.166590536	0.457880573	-5.214301975	0.467810889	1	1	FA_8_3_UV - FA_8_3_noUV	Huh7	limma	0.166590536	0.457880573	FALSE	no hit	6.73935
MPRIP	J3KSW8|Q6WCQ1|Q6WCQ1-2|Q6WCQ1-3	Myosin phosphatase Rho-interacting protein (Fragment) OS=Homo sapiens GN=MPRIP PE=1 SV=1|Myosin phosphatase Rho-interacting protein OS=Homo sapiens GN=MPRIP PE=1 SV=3|Isoform 2 of Myosin phosphatase Rho-interacting protein OS=Homo sapiens GN=MPRIP|Isoform 3 of Myosin phosphatase Rho-interacting protein OS=Homo sapiens GN=MPRIP	1	1	NA	1	NA	8	8	NA	2	2	NA	5	5	NA	6.84536	6.84536	NA	TRUE	FALSE	TRUE	0.193048865	24.64023593	1.483940546	0.166961137	0.457880573	-5.216134487	0.468237255	1	1	FA_8_3_UV - FA_8_3_noUV	Huh7	limma	0.166961137	0.457880573	FALSE	no hit	6.84536
ACLY	P53396|P53396-2	ATP-citrate synthase OS=Homo sapiens GN=ACLY PE=1 SV=3|Isoform 2 of ATP-citrate synthase OS=Homo sapiens GN=ACLY	2	1	1	1	1	8	8	8	2	2	2	23	23	5	7.09285	7.78911	6.39659	TRUE	TRUE	TRUE	-0.260694888	27.20886368	-1.482076758	0.16744776	0.457880573	-5.218533679	0.468796192	1	1	FA_8_3_UV - FA_8_3_noUV	Huh7	limma	0.16744776	0.457880573	FALSE	no hit	7.78911
TPM4	P67936|P67936-2	Isoform 2 of Tropomyosin alpha-4 chain OS=Homo sapiens GN=TPM4|Tropomyosin alpha-4 chain OS=Homo sapiens GN=TPM4 PE=1 SV=3	2	1	1	1	1	8	8	8	2	2	2	10	5	10	7.659445	7.54497	7.77392	TRUE	TRUE	TRUE	-0.403876191	25.02685319	-1.477946837	0.168530407	0.457880573	-5.223843088	0.470036041	1	1	FA_8_3_UV - FA_8_3_noUV	Huh7	limma	0.168530407	0.457880573	FALSE	no hit	7.54497
NAGLU	P54802	Alpha-N-acetylglucosaminidase OS=Homo sapiens GN=NAGLU PE=1 SV=2	1	1	NA	1	NA	8	8	NA	2	2	NA	3	3	NA	6.35431	6.35431	NA	TRUE	FALSE	TRUE	0.212770958	23.45934918	1.475124116	0.169273832	0.457880573	-5.227466478	0.470884495	1	1	FA_8_3_UV - FA_8_3_noUV	Huh7	limma	0.169273832	0.457880573	FALSE	no hit	6.35431
PSMA7	O14818	Proteasome subunit alpha type-7 OS=Homo sapiens GN=PSMA7 PE=1 SV=1	2	1	1	1	1	8	8	8	2	2	2	5	4	5	6.363535	6.45805	6.26902	TRUE	TRUE	TRUE	-0.174548347	24.51693724	-1.474649635	0.169399074	0.457880573	-5.228075108	0.471027198	1	1	FA_8_3_UV - FA_8_3_noUV	Huh7	limma	0.169399074	0.457880573	FALSE	no hit	6.45805
PES1	B5MCF9|O00541|O00541-2	Pescadillo homolog OS=Homo sapiens GN=PES1 PE=1 SV=1|Pescadillo homolog OS=Homo sapiens GN=PES1 PE=1 SV=1|Isoform 2 of Pescadillo homolog OS=Homo sapiens GN=PES1	1	1	NA	1	NA	8	8	NA	2	2	NA	6	6	NA	6.71815	6.71815	NA	TRUE	FALSE	TRUE	0.249740795	25.06740236	1.474293223	0.169493202	0.457880573	-5.228532204	0.471134406	1	1	FA_8_3_UV - FA_8_3_noUV	Huh7	limma	0.169493202	0.457880573	FALSE	no hit	6.71815
RAI14	Q9P0K7|Q9P0K7-2|Q9P0K7-3|Q9P0K7-4	Ankycorbin OS=Homo sapiens GN=RAI14 PE=1 SV=2|Isoform 2 of Ankycorbin OS=Homo sapiens GN=RAI14|Isoform 3 of Ankycorbin OS=Homo sapiens GN=RAI14|Isoform 4 of Ankycorbin OS=Homo sapiens GN=RAI14	1	1	NA	1	NA	8	8	NA	2	2	NA	2	2	NA	6.32172	6.32172	NA	TRUE	FALSE	TRUE	0.243391646	22.90402985	1.473847754	0.169610915	0.457880573	-5.229103416	0.471268422	1	1	FA_8_3_UV - FA_8_3_noUV	Huh7	limma	0.169610915	0.457880573	FALSE	no hit	6.32172
CARM1	Q86X55|Q86X55-1	Histone-arginine methyltransferase CARM1 OS=Homo sapiens GN=CARM1 PE=1 SV=3|Isoform 1 of Histone-arginine methyltransferase CARM1 OS=Homo sapiens GN=CARM1	1	1	NA	1	NA	8	8	NA	2	2	NA	3	3	NA	6.29725	6.29725	NA	TRUE	FALSE	TRUE	-0.22204451	23.19149377	-1.473729977	0.169642048	0.457880573	-5.22925442	0.471303857	1	1	FA_8_3_UV - FA_8_3_noUV	Huh7	limma	0.169642048	0.457880573	FALSE	no hit	6.29725
RUVBL2	Q9Y230|Q9Y230-2	RuvB-like 2 OS=Homo sapiens GN=RUVBL2 PE=1 SV=3|Isoform 2 of RuvB-like 2 OS=Homo sapiens GN=RUVBL2	1	1	NA	1	NA	8	8	NA	2	2	NA	4	4	NA	6.29424	6.29424	NA	TRUE	FALSE	TRUE	-0.174720465	23.97354848	-1.468902412	0.170922408	0.457880573	-5.235437186	0.472757597	1	1	FA_8_3_UV - FA_8_3_noUV	Huh7	limma	0.170922408	0.457880573	FALSE	no hit	6.29424
NIP7	J3QLW7|Q9Y221|Q9Y221-2	60S ribosome subunit biogenesis protein NIP7 homolog OS=Homo sapiens GN=NIP7 PE=1 SV=1|60S ribosome subunit biogenesis protein NIP7 homolog OS=Homo sapiens GN=NIP7 PE=1 SV=1|Isoform 2 of 60S ribosome subunit biogenesis protein NIP7 homolog OS=Homo sapiens GN=NIP7	1	1	NA	1	NA	8	8	NA	2	2	NA	2	2	NA	6.12219	6.12219	NA	TRUE	FALSE	TRUE	0.296466872	23.04922445	1.468657713	0.170987527	0.457880573	-5.235750228	0.47283135	1	1	FA_8_3_UV - FA_8_3_noUV	Huh7	limma	0.170987527	0.457880573	FALSE	no hit	6.12219
DPP7	Q9UHL4	Dipeptidyl peptidase 2 OS=Homo sapiens GN=DPP7 PE=1 SV=3	2	1	1	1	1	8	8	8	2	2	2	5	2	5	6.349185	6.18452	6.51385	TRUE	TRUE	TRUE	0.239440399	23.25854058	1.466209441	0.17164023	0.457880573	-5.238880427	0.473569611	1	1	FA_8_3_UV - FA_8_3_noUV	Huh7	limma	0.17164023	0.457880573	FALSE	no hit	6.18452
NT5C2	P49902|P49902-2|Q5JUV4	Cytosolic purine 5'-nucleotidase OS=Homo sapiens GN=NT5C2 PE=1 SV=1|Isoform 2 of Cytosolic purine 5'-nucleotidase OS=Homo sapiens GN=NT5C2|Cytosolic purine 5'-nucleotidase (Fragment) OS=Homo sapiens GN=NT5C2 PE=1 SV=1	1	1	NA	1	NA	8	8	NA	2	2	NA	2	2	NA	6.38628	6.38628	NA	TRUE	FALSE	TRUE	-0.379794232	23.53010696	-1.465874786	0.171729614	0.457880573	-5.239308031	0.473670574	1	1	FA_8_3_UV - FA_8_3_noUV	Huh7	limma	0.171729614	0.457880573	FALSE	no hit	6.38628
DYNC1LI1	Q9Y6G9	Cytoplasmic dynein 1 light intermediate chain 1 OS=Homo sapiens GN=DYNC1LI1 PE=1 SV=3	1	1	NA	1	NA	8	8	NA	2	2	NA	2	2	NA	6.12001	6.12001	NA	TRUE	FALSE	TRUE	-0.227940971	23.33389535	-1.46525914	0.171894153	0.457880573	-5.240094507	0.473856339	1	1	FA_8_3_UV - FA_8_3_noUV	Huh7	limma	0.171894153	0.457880573	FALSE	no hit	6.12001
PDCD6IP	Q8WUM4	Programmed cell death 6-interacting protein OS=Homo sapiens GN=PDCD6IP PE=1 SV=1	2	1	1	1	1	8	8	8	2	2	2	16	16	3	6.361595	7.12065	5.60254	TRUE	TRUE	TRUE	-0.260750734	26.20974528	-1.464263087	0.172160646	0.457880573	-5.24136649	0.474156974	1	1	FA_8_3_UV - FA_8_3_noUV	Huh7	limma	0.172160646	0.457880573	FALSE	no hit	7.12065
CPSF2	Q9P2I0	Cleavage and polyadenylation specificity factor subunit 2 OS=Homo sapiens GN=CPSF2 PE=1 SV=2	1	1	NA	1	NA	8	8	NA	2	2	NA	2	2	NA	6.331	6.331	NA	TRUE	FALSE	TRUE	0.215403525	23.77227602	1.463502965	0.172364255	0.457880573	-5.242336805	0.47438647	1	1	FA_8_3_UV - FA_8_3_noUV	Huh7	limma	0.172364255	0.457880573	FALSE	no hit	6.331
TAGLN2	P37802|P37802-2|X6RJP6	Transgelin-2 OS=Homo sapiens GN=TAGLN2 PE=1 SV=3|Isoform 2 of Transgelin-2 OS=Homo sapiens GN=TAGLN2|Transgelin-2 (Fragment) OS=Homo sapiens GN=TAGLN2 PE=1 SV=1	2	1	1	1	1	8	8	8	2	2	2	8	3	8	6.7934	6.49934	7.08746	TRUE	TRUE	TRUE	-0.362453151	23.85570885	-1.458916684	0.173597131	0.458858169	-5.248184365	0.475772449	1	1	FA_8_3_UV - FA_8_3_noUV	Huh7	limma	0.173597131	0.458858169	FALSE	no hit	6.49934
PYGL	E9PK47|P06737|P06737-2	Alpha-1,4 glucan phosphorylase OS=Homo sapiens GN=PYGL PE=1 SV=1|Glycogen phosphorylase, liver form OS=Homo sapiens GN=PYGL PE=1 SV=4|Isoform 2 of Glycogen phosphorylase, liver form OS=Homo sapiens GN=PYGL	2	1	1	1	1	8	8	8	2	2	2	6	6	2	6.033325	6.44128	5.62537	TRUE	TRUE	TRUE	-0.165711405	25.08190944	-1.458385014	0.173740541	0.458858169	-5.248861477	0.475933264	1	1	FA_8_3_UV - FA_8_3_noUV	Huh7	limma	0.173740541	0.458858169	FALSE	no hit	6.44128
TROVE2	P10155|P10155-3|P10155-4|P10155-5	60 kDa SS-A/Ro ribonucleoprotein OS=Homo sapiens GN=TROVE2 PE=1 SV=2|Isoform 3 of 60 kDa SS-A/Ro ribonucleoprotein OS=Homo sapiens GN=TROVE2|Isoform 4 of 60 kDa SS-A/Ro ribonucleoprotein OS=Homo sapiens GN=TROVE2|Isoform 5 of 60 kDa SS-A/Ro ribonucleoprotein OS=Homo sapiens GN=TROVE2	1	1	NA	1	NA	8	8	NA	2	2	NA	2	2	NA	6.51856	6.51856	NA	TRUE	FALSE	TRUE	-0.261938229	23.38666885	-1.457603423	0.173951547	0.458858169	-5.249856586	0.476169727	1	1	FA_8_3_UV - FA_8_3_noUV	Huh7	limma	0.173951547	0.458858169	FALSE	no hit	6.51856
SERPINH1	E9PKH2|P50454	Serpin H1 OS=Homo sapiens GN=SERPINH1 PE=1 SV=1|Serpin H1 OS=Homo sapiens GN=SERPINH1 PE=1 SV=2	2	1	1	1	1	8	8	8	2	2	2	8	8	5	6.76853	7.22029	6.31677	TRUE	TRUE	TRUE	0.180621449	25.74321569	1.45542506	0.174540797	0.4593393	-5.252628206	0.476829109	1	1	FA_8_3_UV - FA_8_3_noUV	Huh7	limma	0.174540797	0.4593393	FALSE	no hit	7.22029
EIF5A2|EIF5A|EIF5AL1	C9J4W5|C9J7B5|F8WCJ1|I3L397|I3L504|P63241|P63241-2|Q6IS14|Q9GZV4	Eukaryotic translation initiation factor 5A (Fragment) OS=Homo sapiens GN=EIF5A2 PE=1 SV=1|Eukaryotic translation initiation factor 5A OS=Homo sapiens GN=EIF5A2 PE=1 SV=1|Eukaryotic translation initiation factor 5A OS=Homo sapiens GN=EIF5A2 PE=1 SV=1|Eukaryotic translation initiation factor 5A (Fragment) OS=Homo sapiens GN=EIF5A PE=1 SV=7|Eukaryotic translation initiation factor 5A-1 OS=Homo sapi…	1	1	NA	1	NA	8	8	NA	2	2	NA	2	2	NA	6.69607	6.69607	NA	TRUE	FALSE	TRUE	-0.324436995	23.63865226	-1.4501164	0.175983949	0.461161083	-5.259371288	0.478438112	1	1	FA_8_3_UV - FA_8_3_noUV	Huh7	limma	0.175983949	0.461161083	FALSE	no hit	6.69607
PPP1R9B	D3DTX6|Q96SB3	Neurabin-2 OS=Homo sapiens GN=PPP1R9B PE=1 SV=1|Neurabin-2 OS=Homo sapiens GN=PPP1R9B PE=1 SV=2	2	1	1	1	1	8	8	8	2	2	2	9	5	9	6.65522	6.53412	6.77632	TRUE	TRUE	TRUE	0.1892304	24.48449878	1.449874398	0.176049979	0.461161083	-5.259678297	0.478511532	1	1	FA_8_3_UV - FA_8_3_noUV	Huh7	limma	0.176049979	0.461161083	FALSE	no hit	6.53412
GLUD1	P00367	Glutamate dehydrogenase 1, mitochondrial OS=Homo sapiens GN=GLUD1 PE=1 SV=2	2	1	1	1	1	8	8	8	2	2	2	9	9	8	7.224875	7.52584	6.92391	TRUE	TRUE	TRUE	0.211614807	26.01507605	1.426101743	0.182640173	0.475764899	-5.289672021	0.48575365	1	1	FA_8_3_UV - FA_8_3_noUV	Huh7	limma	0.182640173	0.475764899	FALSE	no hit	7.52584
CTPS1	P17812	CTP synthase 1 OS=Homo sapiens GN=CTPS1 PE=1 SV=2	1	1	NA	1	NA	8	8	NA	2	2	NA	5	5	NA	6.1966	6.1966	NA	TRUE	FALSE	TRUE	-0.316242423	24.62475846	-1.425438829	0.182826911	0.475764899	-5.290503708	0.485956447	1	1	FA_8_3_UV - FA_8_3_noUV	Huh7	limma	0.182826911	0.475764899	FALSE	no hit	6.1966
RPS8	P62241|Q5JR95	40S ribosomal protein S8 OS=Homo sapiens GN=RPS8 PE=1 SV=2|40S ribosomal protein S8 OS=Homo sapiens GN=RPS8 PE=1 SV=1	2	1	1	1	1	8	8	8	2	2	2	4	4	4	6.09803	6.35476	5.8413	TRUE	TRUE	TRUE	-0.197135297	24.05617666	-1.425217647	0.182889253	0.475764899	-5.290781145	0.486024121	1	1	FA_8_3_UV - FA_8_3_noUV	Huh7	limma	0.182889253	0.475764899	FALSE	no hit	6.35476
RPS2	H0YEN5|P15880	40S ribosomal protein S2 (Fragment) OS=Homo sapiens GN=RPS2 PE=1 SV=1|40S ribosomal protein S2 OS=Homo sapiens GN=RPS2 PE=1 SV=2	2	1	1	1	1	8	8	8	2	2	2	3	3	3	6.78055	7.05886	6.50224	TRUE	TRUE	TRUE	-0.463220519	24.2345277	-1.423686451	0.183321324	0.475792586	-5.292700992	0.486492751	1	1	FA_8_3_UV - FA_8_3_noUV	Huh7	limma	0.183321324	0.475792586	FALSE	no hit	7.05886
COPA	P53621|P53621-2	Coatomer subunit alpha OS=Homo sapiens GN=COPA PE=1 SV=2|Isoform 2 of Coatomer subunit alpha OS=Homo sapiens GN=COPA	2	1	1	1	1	8	8	8	2	2	2	12	12	3	6.5148	7.05893	5.97067	TRUE	TRUE	TRUE	-0.144771292	25.7453921	-1.414498064	0.185932326	0.481462377	-5.304192685	0.489310025	1	1	FA_8_3_UV - FA_8_3_noUV	Huh7	limma	0.185932326	0.481462377	FALSE	no hit	7.05893
MARS	P56192	Methionine--tRNA ligase, cytoplasmic OS=Homo sapiens GN=MARS PE=1 SV=2	1	1	NA	1	NA	8	8	NA	2	2	NA	8	8	NA	6.78466	6.78466	NA	TRUE	FALSE	TRUE	-0.138385228	25.34919817	-1.411278494	0.186854633	0.482743433	-5.308207553	0.49029926	1	1	FA_8_3_UV - FA_8_3_noUV	Huh7	limma	0.186854633	0.482743433	FALSE	no hit	6.78466
HSPA8	P11142	Heat shock cognate 71 kDa protein OS=Homo sapiens GN=HSPA8 PE=1 SV=1	2	1	1	1	1	8	8	8	2	2	2	17	17	15	7.89014	8.0785	7.70178	TRUE	TRUE	TRUE	-0.225427194	26.99901668	-1.40869308	0.187598073	0.48342055	-5.311427175	0.491094425	1	1	FA_8_3_UV - FA_8_3_noUV	Huh7	limma	0.187598073	0.48342055	FALSE	no hit	8.0785
HAT1	O14929	Histone acetyltransferase type B catalytic subunit OS=Homo sapiens GN=HAT1 PE=1 SV=1	1	1	NA	1	NA	8	8	NA	2	2	NA	2	2	NA	6.30543	6.30543	NA	TRUE	FALSE	TRUE	-0.204043582	23.23698111	-1.407392186	0.187973093	0.48342055	-5.313045682	0.491494786	1	1	FA_8_3_UV - FA_8_3_noUV	Huh7	limma	0.187973093	0.48342055	FALSE	no hit	6.30543
CDC123	O75794	Cell division cycle protein 123 homolog OS=Homo sapiens GN=CDC123 PE=1 SV=1	1	1	NA	1	NA	8	8	NA	2	2	NA	3	3	NA	5.80827	5.80827	NA	TRUE	FALSE	TRUE	-0.21601302	23.16679344	-1.405784773	0.18843735	0.483513109	-5.315044157	0.491989724	1	1	FA_8_3_UV - FA_8_3_noUV	Huh7	limma	0.18843735	0.483513109	FALSE	no hit	5.80827
PCK2	B4DW73|H0YML5|Q16822	Phosphoenolpyruvate carboxykinase [GTP], mitochondrial OS=Homo sapiens GN=PCK2 PE=1 SV=1|Phosphoenolpyruvate carboxykinase [GTP], mitochondrial OS=Homo sapiens GN=PCK2 PE=1 SV=1|Phosphoenolpyruvate carboxykinase [GTP], mitochondrial OS=Homo sapiens GN=PCK2 PE=1 SV=3	1	1	NA	1	NA	8	8	NA	2	2	NA	3	3	NA	6.26777	6.26777	NA	TRUE	FALSE	TRUE	0.18696761	23.32872753	1.402814966	0.189297647	0.484619146	-5.318732437	0.492904859	1	1	FA_8_3_UV - FA_8_3_noUV	Huh7	limma	0.189297647	0.484619146	FALSE	no hit	6.26777
HIST1H1E|HIST1H1D|HIST1H1C	P10412|P16402|P16403	Histone H1.4 OS=Homo sapiens GN=HIST1H1E PE=1 SV=2|Histone H1.3 OS=Homo sapiens GN=HIST1H1D PE=1 SV=2|Histone H1.2 OS=Homo sapiens GN=HIST1H1C PE=1 SV=2	1	1	NA	1	NA	8	8	NA	2	2	NA	3	3	NA	7.15222	7.15222	NA	TRUE	FALSE	TRUE	0.259849053	24.87002111	1.397631505	0.190807142	0.487378425	-5.325157309	0.494504306	1	1	FA_8_3_UV - FA_8_3_noUV	Huh7	limma	0.190807142	0.487378425	FALSE	no hit	7.15222
TRMT10C	Q7L0Y3	Mitochondrial ribonuclease P protein 1 OS=Homo sapiens GN=TRMT10C PE=1 SV=2	1	1	NA	1	NA	8	8	NA	2	2	NA	2	2	NA	6.27557	6.27557	NA	TRUE	FALSE	TRUE	0.320028741	22.55778115	1.394601416	0.191694239	0.487952761	-5.328905645	0.495440576	1	1	FA_8_3_UV - FA_8_3_noUV	Huh7	limma	0.191694239	0.487952761	FALSE	no hit	6.27557
NUP160	Q12769	Nuclear pore complex protein Nup160 OS=Homo sapiens GN=NUP160 PE=1 SV=3	1	1	NA	1	NA	8	8	NA	2	2	NA	8	8	NA	6.85446	6.85446	NA	TRUE	FALSE	TRUE	0.33718201	24.82281992	1.39391257	0.191896392	0.487952761	-5.329757006	0.495653556	1	1	FA_8_3_UV - FA_8_3_noUV	Huh7	limma	0.191896392	0.487952761	FALSE	no hit	6.85446
PMM2	H3BPH4|H3BV55|O15305	Phosphomannomutase (Fragment) OS=Homo sapiens GN=PMM2 PE=1 SV=1|Phosphomannomutase OS=Homo sapiens GN=PMM2 PE=1 SV=1|Phosphomannomutase 2 OS=Homo sapiens GN=PMM2 PE=1 SV=1	1	1	NA	1	NA	8	8	NA	2	2	NA	3	3	NA	6.10068	6.10068	NA	TRUE	FALSE	TRUE	-0.28235583	23.79593779	-1.391649889	0.192561675	0.488544114	-5.3325515	0.496353481	1	1	FA_8_3_UV - FA_8_3_noUV	Huh7	limma	0.192561675	0.488544114	FALSE	no hit	6.10068
SPAG9	A0A087X2D8|O60271|O60271-2|O60271-4	C-Jun-amino-terminal kinase-interacting protein 4 OS=Homo sapiens GN=SPAG9 PE=1 SV=1|C-Jun-amino-terminal kinase-interacting protein 4 OS=Homo sapiens GN=SPAG9 PE=1 SV=4|Isoform 2 of C-Jun-amino-terminal kinase-interacting protein 4 OS=Homo sapiens GN=SPAG9|Isoform 4 of C-Jun-amino-terminal kinase-interacting protein 4 OS=Homo sapiens GN=SPAG9	1	1	NA	1	NA	8	8	NA	2	2	NA	4	4	NA	6.56723	6.56723	NA	TRUE	FALSE	TRUE	-0.246127839	24.46298673	-1.389317534	0.193249475	0.489189815	-5.335428823	0.497075511	1	1	FA_8_3_UV - FA_8_3_noUV	Huh7	limma	0.193249475	0.489189815	FALSE	no hit	6.56723
UHRF1	A0A087WTW0|A0A087WVR3|Q96T88|Q96T88-2	E3 ubiquitin-protein ligase UHRF1 OS=Homo sapiens GN=UHRF1 PE=1 SV=1|E3 ubiquitin-protein ligase UHRF1 OS=Homo sapiens GN=UHRF1 PE=1 SV=1|E3 ubiquitin-protein ligase UHRF1 OS=Homo sapiens GN=UHRF1 PE=1 SV=1|Isoform 2 of E3 ubiquitin-protein ligase UHRF1 OS=Homo sapiens GN=UHRF1	1	1	NA	1	NA	8	8	NA	2	2	NA	3	3	NA	6.46928	6.46928	NA	TRUE	FALSE	TRUE	0.267801501	23.09152511	1.383498913	0.194974375	0.490537765	-5.342592693	0.498879224	1	1	FA_8_3_UV - FA_8_3_noUV	Huh7	limma	0.194974375	0.490537765	FALSE	no hit	6.46928
KIF20B	Q96Q89|Q96Q89-2|Q96Q89-3|Q96Q89-4	Kinesin-like protein KIF20B OS=Homo sapiens GN=KIF20B PE=1 SV=3|Isoform 2 of Kinesin-like protein KIF20B OS=Homo sapiens GN=KIF20B|Isoform 3 of Kinesin-like protein KIF20B OS=Homo sapiens GN=KIF20B|Isoform 4 of Kinesin-like protein KIF20B OS=Homo sapiens GN=KIF20B	1	1	NA	1	NA	8	8	NA	2	2	NA	3	3	NA	5.97485	5.97485	NA	TRUE	FALSE	TRUE	0.181911195	23.45444913	1.38326473	0.195044068	0.490537765	-5.342880589	0.498951891	1	1	FA_8_3_UV - FA_8_3_noUV	Huh7	limma	0.195044068	0.490537765	FALSE	no hit	5.97485
PHYHIPL	Q96FC7|Q96FC7-2	Phytanoyl-CoA hydroxylase-interacting protein-like OS=Homo sapiens GN=PHYHIPL PE=1 SV=3|Isoform 2 of Phytanoyl-CoA hydroxylase-interacting protein-like OS=Homo sapiens GN=PHYHIPL	1	1	NA	1	NA	8	8	NA	2	2	NA	3	3	NA	6.37773	6.37773	NA	TRUE	FALSE	TRUE	-0.189087557	23.67436146	-1.383125758	0.195085435	0.490537765	-5.343051422	0.498995017	1	1	FA_8_3_UV - FA_8_3_noUV	Huh7	limma	0.195085435	0.490537765	FALSE	no hit	6.37773
MRPL19	P49406	39S ribosomal protein L19, mitochondrial OS=Homo sapiens GN=MRPL19 PE=1 SV=2	1	1	NA	1	NA	8	8	NA	2	2	NA	3	3	NA	6.14765	6.14765	NA	TRUE	FALSE	TRUE	0.214212796	22.62995669	1.381041622	0.195706703	0.491006373	-5.345611952	0.499642002	1	1	FA_8_3_UV - FA_8_3_noUV	Huh7	limma	0.195706703	0.491006373	FALSE	no hit	6.14765
EEF1G	P26641|P26641-2	Elongation factor 1-gamma OS=Homo sapiens GN=EEF1G PE=1 SV=3|Isoform 2 of Elongation factor 1-gamma OS=Homo sapiens GN=EEF1G	2	1	1	1	1	8	8	8	2	2	2	12	12	7	7.46846	7.78927	7.14765	TRUE	TRUE	TRUE	-0.262137607	26.57074363	-1.37812402	0.196579211	0.491384914	-5.349192036	0.500548471	1	1	FA_8_3_UV - FA_8_3_noUV	Huh7	limma	0.196579211	0.491384914	FALSE	no hit	7.78927
SDF4	Q9BRK5|Q9BRK5-2|Q9BRK5-6	45 kDa calcium-binding protein OS=Homo sapiens GN=SDF4 PE=1 SV=1|Isoform 2 of 45 kDa calcium-binding protein OS=Homo sapiens GN=SDF4|Isoform 6 of 45 kDa calcium-binding protein OS=Homo sapiens GN=SDF4	2	1	1	1	1	8	8	8	2	2	2	4	4	3	6.510185	6.95523	6.06514	TRUE	TRUE	TRUE	0.179516642	24.6364005	1.377627364	0.196728061	0.491384914	-5.349800951	0.500702864	1	1	FA_8_3_UV - FA_8_3_noUV	Huh7	limma	0.196728061	0.491384914	FALSE	no hit	6.95523
CTSB	P07858	Cathepsin B OS=Homo sapiens GN=CTSB PE=1 SV=3	2	1	1	1	1	8	8	8	2	2	2	4	2	4	7.393325	7.32455	7.4621	TRUE	TRUE	TRUE	0.230031826	24.31622665	1.374150763	0.197772661	0.492903607	-5.354059151	0.501784322	1	1	FA_8_3_UV - FA_8_3_noUV	Huh7	limma	0.197772661	0.492903607	FALSE	no hit	7.32455
LRRC15	Q8TF66|Q8TF66-2	Leucine-rich repeat-containing protein 15 OS=Homo sapiens GN=LRRC15 PE=2 SV=2|Isoform 2 of Leucine-rich repeat-containing protein 15 OS=Homo sapiens GN=LRRC15	1	1	NA	1	NA	8	8	NA	2	2	NA	3	3	NA	6.72335	6.72335	NA	TRUE	FALSE	TRUE	0.282186378	23.5101937	1.372102288	0.198390331	0.49335393	-5.356564708	0.502422115	1	1	FA_8_3_UV - FA_8_3_noUV	Huh7	limma	0.198390331	0.49335393	FALSE	no hit	6.72335
GLOD4	F6TLX2|Q9HC38-2	Glyoxalase domain-containing protein 4 OS=Homo sapiens GN=GLOD4 PE=1 SV=1|Isoform 2 of Glyoxalase domain-containing protein 4 OS=Homo sapiens GN=GLOD4	2	1	1	1	1	8	8	8	2	2	2	10	3	10	6.866805	6.59426	7.13935	TRUE	TRUE	TRUE	-0.372675349	24.0816712	-1.369911211	0.199052789	0.493913403	-5.359241849	0.503104781	1	1	FA_8_3_UV - FA_8_3_noUV	Huh7	limma	0.199052789	0.493913403	FALSE	no hit	6.59426
SKIV2L2	P42285	Superkiller viralicidic activity 2-like 2 OS=Homo sapiens GN=SKIV2L2 PE=1 SV=3	1	1	NA	1	NA	8	8	NA	2	2	NA	7	7	NA	6.88647	6.88647	NA	TRUE	FALSE	TRUE	0.200380143	24.82642675	1.364325763	0.200749892	0.4967044	-5.366053054	0.504847234	1	1	FA_8_3_UV - FA_8_3_noUV	Huh7	limma	0.200749892	0.4967044	FALSE	no hit	6.88647
GANAB	F5H6X6|Q14697|Q14697-2	Isoform 2 of Neutral alpha-glucosidase AB OS=Homo sapiens GN=GANAB|Neutral alpha-glucosidase AB OS=Homo sapiens GN=GANAB PE=1 SV=1|Neutral alpha-glucosidase AB OS=Homo sapiens GN=GANAB PE=1 SV=3	2	1	1	1	1	8	8	8	2	2	2	25	18	25	7.947225	8.21643	7.67802	TRUE	TRUE	TRUE	0.157352938	26.9567856	1.363317625	0.201057494	0.4967044	-5.367280393	0.505162074	1	1	FA_8_3_UV - FA_8_3_noUV	Huh7	limma	0.201057494	0.4967044	FALSE	no hit	8.21643
PSMB5	P28074	Proteasome subunit beta type-5 OS=Homo sapiens GN=PSMB5 PE=1 SV=3	1	1	NA	1	NA	8	8	NA	2	2	NA	3	3	NA	6.6271	6.6271	NA	TRUE	FALSE	TRUE	-0.162505599	23.5758153	-1.36178792	0.201524988	0.496719155	-5.36914151	0.505639997	1	1	FA_8_3_UV - FA_8_3_noUV	Huh7	limma	0.201524988	0.496719155	FALSE	no hit	6.6271
GFM1	C9IZ01|Q96RP9|Q96RP9-2	Elongation factor G, mitochondrial OS=Homo sapiens GN=GFM1 PE=1 SV=1|Elongation factor G, mitochondrial OS=Homo sapiens GN=GFM1 PE=1 SV=2|Isoform 2 of Elongation factor G, mitochondrial OS=Homo sapiens GN=GFM1	2	1	1	1	1	8	8	8	2	2	2	14	14	3	6.52944	7.46727	5.59161	TRUE	TRUE	TRUE	0.197364035	26.69446122	1.360421351	0.201943394	0.496719155	-5.370802928	0.506067152	1	1	FA_8_3_UV - FA_8_3_noUV	Huh7	limma	0.201943394	0.496719155	FALSE	no hit	7.46727
UCHL1	P09936	Ubiquitin carboxyl-terminal hydrolase isozyme L1 OS=Homo sapiens GN=UCHL1 PE=1 SV=2	1	1	NA	1	NA	8	8	NA	2	2	NA	6	6	NA	7.72642	7.72642	NA	TRUE	FALSE	TRUE	-0.522486105	25.95944389	-1.352174149	0.204483885	0.500701366	-5.380805043	0.508649047	1	1	FA_8_3_UV - FA_8_3_noUV	Huh7	limma	0.204483885	0.500701366	FALSE	no hit	7.72642
TTC38	Q5R3I4	Tetratricopeptide repeat protein 38 OS=Homo sapiens GN=TTC38 PE=1 SV=1	1	1	NA	1	NA	8	8	NA	2	2	NA	2	2	NA	6.4123	6.4123	NA	TRUE	FALSE	TRUE	-0.310095715	22.84186472	-1.351998197	0.204538375	0.500701366	-5.381017976	0.508704206	1	1	FA_8_3_UV - FA_8_3_noUV	Huh7	limma	0.204538375	0.500701366	FALSE	no hit	6.4123
UTP4	H3BSH7|Q969X6|Q969X6-3	U3 small nucleolar RNA-associated protein 4 homolog (Fragment) OS=Homo sapiens GN=UTP4 PE=1 SV=1|U3 small nucleolar RNA-associated protein 4 homolog OS=Homo sapiens GN=UTP4 PE=1 SV=1|Isoform 3 of U3 small nucleolar RNA-associated protein 4 homolog OS=Homo sapiens GN=UTP4	1	1	NA	1	NA	8	8	NA	2	2	NA	3	3	NA	6.36542	6.36542	NA	TRUE	FALSE	TRUE	0.279848801	23.72506927	1.350854508	0.204892853	0.500701366	-5.382401578	0.509062818	1	1	FA_8_3_UV - FA_8_3_noUV	Huh7	limma	0.204892853	0.500701366	FALSE	no hit	6.36542
SRGAP2	A2RUF3|B7ZM87|O75044|Q5VZB4	SLIT-ROBO Rho GTPase activating protein 2 OS=Homo sapiens GN=SRGAP2 PE=1 SV=1|SLIT-ROBO Rho GTPase-activating protein 2 OS=Homo sapiens GN=SRGAP2 PE=1 SV=1|SLIT-ROBO Rho GTPase-activating protein 2 OS=Homo sapiens GN=SRGAP2 PE=1 SV=2|SLIT-ROBO Rho GTPase activating protein 2 (Fragment) OS=Homo sapiens GN=SRGAP2 PE=1 SV=1	1	1	NA	1	NA	8	8	NA	2	2	NA	2	2	NA	6.33642	6.33642	NA	TRUE	FALSE	TRUE	-0.165417711	23.49091817	-1.347743926	0.205859546	0.501154677	-5.386160555	0.510038832	1	1	FA_8_3_UV - FA_8_3_noUV	Huh7	limma	0.205859546	0.501154677	FALSE	no hit	6.33642
PPP4C	H3BTA2|P60510	Serine/threonine-protein phosphatase (Fragment) OS=Homo sapiens GN=PPP4C PE=1 SV=1|Serine/threonine-protein phosphatase 4 catalytic subunit OS=Homo sapiens GN=PPP4C PE=1 SV=1	1	1	NA	1	NA	8	8	NA	2	2	NA	3	3	NA	6.26067	6.26067	NA	TRUE	FALSE	TRUE	-0.197241817	23.25469558	-1.345080979	0.206690139	0.501154677	-5.3893738	0.510875167	1	1	FA_8_3_UV - FA_8_3_noUV	Huh7	limma	0.206690139	0.501154677	FALSE	no hit	6.26067
XPO7	E7ESC6|Q9UIA9	Exportin-7 OS=Homo sapiens GN=XPO7 PE=1 SV=1|Exportin-7 OS=Homo sapiens GN=XPO7 PE=1 SV=3	1	1	NA	1	NA	8	8	NA	2	2	NA	4	4	NA	6.17612	6.17612	NA	TRUE	FALSE	TRUE	-0.175634613	23.86133906	-1.343928966	0.207050323	0.501154677	-5.390762506	0.511237195	1	1	FA_8_3_UV - FA_8_3_noUV	Huh7	limma	0.207050323	0.501154677	FALSE	no hit	6.17612
GOLGB1	Q14789|Q14789-2|Q14789-3|Q14789-4	Golgin subfamily B member 1 OS=Homo sapiens GN=GOLGB1 PE=1 SV=2|Isoform 2 of Golgin subfamily B member 1 OS=Homo sapiens GN=GOLGB1|Isoform 3 of Golgin subfamily B member 1 OS=Homo sapiens GN=GOLGB1|Isoform 4 of Golgin subfamily B member 1 OS=Homo sapiens GN=GOLGB1	2	1	1	1	1	8	8	8	2	2	2	45	17	45	6.899885	6.99176	6.80801	TRUE	TRUE	TRUE	0.214101465	26.0727124	1.34114961	0.207921455	0.501154677	-5.394109494	0.512111178	1	1	FA_8_3_UV - FA_8_3_noUV	Huh7	limma	0.207921455	0.501154677	FALSE	no hit	6.99176
RRBP1	A0A087WVV2|A0A0A0MRV0|Q9P2E9	Ribosome-binding protein 1 OS=Homo sapiens GN=RRBP1 PE=1 SV=1|Ribosome-binding protein 1 OS=Homo sapiens GN=RRBP1 PE=1 SV=1|Ribosome-binding protein 1 OS=Homo sapiens GN=RRBP1 PE=1 SV=4	2	1	1	1	1	8	8	8	2	2	2	19	18	19	7.10426	7.25608	6.95244	TRUE	TRUE	TRUE	0.147685734	26.85760593	1.339844895	0.20833144	0.501154677	-5.395679006	0.512521721	1	1	FA_8_3_UV - FA_8_3_noUV	Huh7	limma	0.20833144	0.501154677	FALSE	no hit	7.25608
NUP107	P57740|P57740-2	Nuclear pore complex protein Nup107 OS=Homo sapiens GN=NUP107 PE=1 SV=1|Isoform 2 of Nuclear pore complex protein Nup107 OS=Homo sapiens GN=NUP107	2	1	1	1	1	8	8	8	2	2	2	8	8	3	6.49093	7.0171	5.96476	TRUE	TRUE	TRUE	0.295900788	25.3682341	1.339680508	0.208383143	0.501154677	-5.39587668	0.512573459	1	1	FA_8_3_UV - FA_8_3_noUV	Huh7	limma	0.208383143	0.501154677	FALSE	no hit	7.0171
MYL6	B7Z6Z4|F8VPF3|F8W1R7|G3V1V0|G8JLA2|J3KND3|P60660|P60660-2	Isoform Smooth muscle of Myosin light polypeptide 6 OS=Homo sapiens GN=MYL6|Myosin light polypeptide 6 (Fragment) OS=Homo sapiens GN=MYL6 PE=1 SV=1|Myosin light polypeptide 6 OS=Homo sapiens GN=MYL6 PE=1 SV=1|Myosin light polypeptide 6 OS=Homo sapiens GN=MYL6 PE=1 SV=2	2	1	1	1	1	8	8	8	2	2	2	6	6	6	7.4575	7.74614	7.16886	TRUE	TRUE	TRUE	-0.263065288	25.51338612	-1.338902978	0.208627839	0.501154677	-5.396811425	0.512818212	1	1	FA_8_3_UV - FA_8_3_noUV	Huh7	limma	0.208627839	0.501154677	FALSE	no hit	7.74614
RMDN1	H0YBD9|H0YC27|H0YC67|Q96DB5|Q96DB5-2	Isoform 2 of Regulator of microtubule dynamics protein 1 OS=Homo sapiens GN=RMDN1|Regulator of microtubule dynamics protein 1 (Fragment) OS=Homo sapiens GN=RMDN1 PE=1 SV=1|Regulator of microtubule dynamics protein 1 OS=Homo sapiens GN=RMDN1 PE=1 SV=1	2	1	1	1	1	8	8	8	2	2	2	4	2	4	6.25665	6.45997	6.05333	TRUE	TRUE	TRUE	0.13607362	24.04155771	1.338897723	0.208629494	0.501154677	-5.396817741	0.512819866	1	1	FA_8_3_UV - FA_8_3_noUV	Huh7	limma	0.208629494	0.501154677	FALSE	no hit	6.45997
PC	P11498	Pyruvate carboxylase, mitochondrial OS=Homo sapiens GN=PC PE=1 SV=2	1	1	NA	1	NA	8	8	NA	2	2	NA	13	13	NA	7.29712	7.29712	NA	TRUE	FALSE	TRUE	0.155196392	26.03478201	1.336173739	0.209488644	0.502150061	-5.400089508	0.51367781	1	1	FA_8_3_UV - FA_8_3_noUV	Huh7	limma	0.209488644	0.502150061	FALSE	no hit	7.29712
EXOSC7	Q15024	Exosome complex component RRP42 OS=Homo sapiens GN=EXOSC7 PE=1 SV=3	1	1	NA	1	NA	8	8	NA	2	2	NA	2	2	NA	6.0786	6.0786	NA	TRUE	FALSE	TRUE	0.23640113	22.60471433	1.332600615	0.210620063	0.50274391	-5.4043741	0.514804329	1	1	FA_8_3_UV - FA_8_3_noUV	Huh7	limma	0.210620063	0.50274391	FALSE	no hit	6.0786
CKAP4	Q07065	Cytoskeleton-associated protein 4 OS=Homo sapiens GN=CKAP4 PE=1 SV=2	1	1	NA	1	NA	8	8	NA	2	2	NA	4	4	NA	6.51509	6.51509	NA	TRUE	FALSE	TRUE	0.189385012	24.33343627	1.332578796	0.210626988	0.50274391	-5.404400239	0.514811212	1	1	FA_8_3_UV - FA_8_3_noUV	Huh7	limma	0.210626988	0.50274391	FALSE	no hit	6.51509
YWHAZ	P63104	14-3-3 protein zeta/delta OS=Homo sapiens GN=YWHAZ PE=1 SV=1	2	1	1	1	1	8	8	8	2	2	2	8	8	8	7.855975	8.12085	7.5911	TRUE	TRUE	TRUE	-0.393859096	25.64543208	-1.329823835	0.211502817	0.503006887	-5.407698228	0.515680667	1	1	FA_8_3_UV - FA_8_3_noUV	Huh7	limma	0.211502817	0.503006887	FALSE	no hit	8.12085
ETFA	P13804	Electron transfer flavoprotein subunit alpha, mitochondrial OS=Homo sapiens GN=ETFA PE=1 SV=1	2	1	1	1	1	8	8	8	2	2	2	5	2	5	6.99541	7.42004	6.57078	TRUE	TRUE	TRUE	-0.17137482	23.99080528	-1.329430116	0.21162823	0.503006887	-5.40816916	0.515804985	1	1	FA_8_3_UV - FA_8_3_noUV	Huh7	limma	0.21162823	0.503006887	FALSE	no hit	7.42004
PGD	P52209|P52209-2	6-phosphogluconate dehydrogenase, decarboxylating OS=Homo sapiens GN=PGD PE=1 SV=3|Isoform 2 of 6-phosphogluconate dehydrogenase, decarboxylating OS=Homo sapiens GN=PGD	2	1	1	1	1	8	8	8	2	2	2	10	10	7	7.018135	7.27169	6.76458	TRUE	TRUE	TRUE	-0.303008101	26.02101602	-1.32558009	0.212857845	0.504866611	-5.41276907	0.517021465	1	1	FA_8_3_UV - FA_8_3_noUV	Huh7	limma	0.212857845	0.504866611	FALSE	no hit	7.27169
EIF3K	K7ERF1|K7ES31|Q9UBQ5|Q9UBQ5-2	Eukaryotic translation initiation factor 3 subunit K OS=Homo sapiens GN=EIF3K PE=1 SV=1|Eukaryotic translation initiation factor 3 subunit K OS=Homo sapiens GN=EIF3K PE=1 SV=1|Eukaryotic translation initiation factor 3 subunit K OS=Homo sapiens GN=EIF3K PE=1 SV=1|Isoform 2 of Eukaryotic translation initiation factor 3 subunit K OS=Homo sapiens GN=EIF3K	1	1	NA	1	NA	8	8	NA	2	2	NA	3	3	NA	6.7494	6.7494	NA	TRUE	FALSE	TRUE	-0.149674588	24.20253629	-1.321771825	0.214079931	0.506602636	-5.417309842	0.518226209	1	1	FA_8_3_UV - FA_8_3_noUV	Huh7	limma	0.214079931	0.506602636	FALSE	no hit	6.7494
NUDT21	O43809	Cleavage and polyadenylation specificity factor subunit 5 OS=Homo sapiens GN=NUDT21 PE=1 SV=1	2	1	1	1	1	8	8	8	2	2	2	4	2	4	6.22549	6.4247	6.02628	TRUE	TRUE	TRUE	0.159606049	23.80826572	1.320506656	0.21448721	0.506602636	-5.418816324	0.518626766	1	1	FA_8_3_UV - FA_8_3_noUV	Huh7	limma	0.21448721	0.506602636	FALSE	no hit	6.4247
LONP1	K7EJE8|K7EKE6|P36776|P36776-2	Isoform 2 of Lon protease homolog, mitochondrial OS=Homo sapiens GN=LONP1|Lon protease homolog, mitochondrial OS=Homo sapiens GN=LONP1 PE=1 SV=1|Lon protease homolog, mitochondrial OS=Homo sapiens GN=LONP1 PE=1 SV=2	2	1	1	1	1	8	8	8	2	2	2	9	9	6	6.40476	6.73372	6.0758	TRUE	TRUE	TRUE	0.270838225	25.45904802	1.315930315	0.215965756	0.508742644	-5.424257025	0.520076987	1	1	FA_8_3_UV - FA_8_3_noUV	Huh7	limma	0.215965756	0.508742644	FALSE	no hit	6.73372
RPL9	D6RAN4|E7ESE0|H0Y9V9|P32969	60S ribosomal protein L9 (Fragment) OS=Homo sapiens GN=RPL9 PE=1 SV=1|60S ribosomal protein L9 (Fragment) OS=Homo sapiens GN=RPL9 PE=1 SV=7|60S ribosomal protein L9 OS=Homo sapiens GN=RPL9 PE=1 SV=1	2	1	1	1	1	8	8	8	2	2	2	2	2	2	5.83283	6.07105	5.59461	TRUE	TRUE	TRUE	-0.260141342	22.54171733	-1.314916372	0.216294481	0.508742644	-5.425460669	0.520398584	1	1	FA_8_3_UV - FA_8_3_noUV	Huh7	limma	0.216294481	0.508742644	FALSE	no hit	6.07105
PTBP1	A0A0U1RRM4|A6NLN1|P26599|P26599-2|P26599-3	Isoform 2 of Polypyrimidine tract-binding protein 1 OS=Homo sapiens GN=PTBP1|Isoform 3 of Polypyrimidine tract-binding protein 1 OS=Homo sapiens GN=PTBP1|Polypyrimidine tract-binding protein 1 OS=Homo sapiens GN=PTBP1 PE=1 SV=1|Polypyrimidine tract binding protein 1, isoform CRA_b OS=Homo sapiens GN=PTBP1 PE=1 SV=4	2	1	1	1	1	8	8	8	2	2	2	6	6	6	7.230965	7.23929	7.22264	TRUE	TRUE	TRUE	0.166758594	25.12761783	1.311903293	0.217273772	0.509983553	-5.429033596	0.521354859	1	1	FA_8_3_UV - FA_8_3_noUV	Huh7	limma	0.217273772	0.509983553	FALSE	no hit	7.23929
RTCB	Q9Y3I0	tRNA-splicing ligase RtcB homolog OS=Homo sapiens GN=RTCB PE=1 SV=1	1	1	NA	1	NA	8	8	NA	2	2	NA	3	3	NA	6.50551	6.50551	NA	TRUE	FALSE	TRUE	-0.168019548	23.86785216	-1.307965207	0.218559209	0.511934818	-5.433694634	0.52260607	1	1	FA_8_3_UV - FA_8_3_noUV	Huh7	limma	0.218559209	0.511934818	FALSE	no hit	6.50551
BLMH	Q13867	Bleomycin hydrolase OS=Homo sapiens GN=BLMH PE=1 SV=1	2	1	1	1	1	8	8	8	2	2	2	8	4	8	7.05849	7.07398	7.043	TRUE	TRUE	TRUE	-0.247133767	24.0392907	-1.306582653	0.219011972	0.511934818	-5.435328636	0.523045702	1	1	FA_8_3_UV - FA_8_3_noUV	Huh7	limma	0.219011972	0.511934818	FALSE	no hit	7.07398
GOT1	P17174	Aspartate aminotransferase, cytoplasmic OS=Homo sapiens GN=GOT1 PE=1 SV=3	2	1	1	1	1	8	8	8	2	2	2	6	6	4	6.600925	6.98284	6.21901	TRUE	TRUE	TRUE	-0.267766975	25.27908275	-1.304185356	0.219798877	0.51208877	-5.438159019	0.523808456	1	1	FA_8_3_UV - FA_8_3_noUV	Huh7	limma	0.219798877	0.51208877	FALSE	no hit	6.98284
H2AFY	O75367|O75367-2|O75367-3	Core histone macro-H2A.1 OS=Homo sapiens GN=H2AFY PE=1 SV=4|Isoform 1 of Core histone macro-H2A.1 OS=Homo sapiens GN=H2AFY|Isoform 3 of Core histone macro-H2A.1 OS=Homo sapiens GN=H2AFY	2	1	1	1	1	8	8	8	2	2	2	13	3	13	6.75273	6.57156	6.9339	TRUE	TRUE	TRUE	0.160478396	24.41200591	1.302274323	0.220427831	0.51208877	-5.440412641	0.524416903	1	1	FA_8_3_UV - FA_8_3_noUV	Huh7	limma	0.220427831	0.51208877	FALSE	no hit	6.57156
TCEB2	A0A0B4J296|B8ZZU8|I3L0M9|Q15370|Q15370-2	Isoform 2 of Transcription elongation factor B polypeptide 2 OS=Homo sapiens GN=TCEB2|Transcription elongation factor B (SIII), polypeptide 2 (18kDa, elongin B), isoform CRA_b OS=Homo sapiens GN=TCEB2 PE=1 SV=1|Transcription elongation factor B polypeptide 2 (Fragment) OS=Homo sapiens GN=TCEB2 PE=1 SV=1|Transcription elongation factor B polypeptide 2 OS=Homo sapiens GN=TCEB2 PE=1 SV=1	2	1	1	1	1	8	8	8	2	2	2	2	2	2	6.373325	6.42784	6.31881	TRUE	TRUE	TRUE	-0.227130942	23.96440746	-1.301783138	0.220589727	0.51208877	-5.440991499	0.524573348	1	1	FA_8_3_UV - FA_8_3_noUV	Huh7	limma	0.220589727	0.51208877	FALSE	no hit	6.42784
MANBA	O00462	Beta-mannosidase OS=Homo sapiens GN=MANBA PE=2 SV=3	1	1	NA	1	NA	8	8	NA	2	2	NA	3	3	NA	6.13283	6.13283	NA	TRUE	FALSE	TRUE	0.219799387	24.16245926	1.300866412	0.220892145	0.51208877	-5.442071439	0.524865394	1	1	FA_8_3_UV - FA_8_3_noUV	Huh7	limma	0.220892145	0.51208877	FALSE	no hit	6.13283
COPE	A0A087X0I4|M0QXB4|O14579|O14579-2|O14579-3	Coatomer protein complex, subunit epsilon, isoform CRA_g OS=Homo sapiens GN=COPE PE=1 SV=1|Coatomer subunit epsilon OS=Homo sapiens GN=COPE PE=1 SV=1|Coatomer subunit epsilon OS=Homo sapiens GN=COPE PE=1 SV=3|Isoform 2 of Coatomer subunit epsilon OS=Homo sapiens GN=COPE|Isoform 3 of Coatomer subunit epsilon OS=Homo sapiens GN=COPE	2	1	1	1	1	8	8	8	2	2	2	2	2	2	6.053685	6.35538	5.75199	TRUE	TRUE	TRUE	-0.166860282	23.34221442	-1.295924848	0.22252818	0.514824416	-5.447883442	0.526441086	1	1	FA_8_3_UV - FA_8_3_noUV	Huh7	limma	0.22252818	0.514824416	FALSE	no hit	6.35538
YLPM1	F8VU51|H0YIQ2|P49750-4	Isoform 4 of YLP motif-containing protein 1 OS=Homo sapiens GN=YLPM1|YLP motif-containing protein 1 (Fragment) OS=Homo sapiens GN=YLPM1 PE=1 SV=1|YLP motif-containing protein 1 OS=Homo sapiens GN=YLPM1 PE=1 SV=1	2	1	1	1	1	8	8	8	2	2	2	2	2	2	6.46496	6.63943	6.29049	TRUE	TRUE	TRUE	0.16637838	22.75352476	1.290398169	0.224369694	0.516391208	-5.454364871	0.528206209	1	1	FA_8_3_UV - FA_8_3_noUV	Huh7	limma	0.224369694	0.516391208	FALSE	no hit	6.63943
PITRM1	Q5JRX3|Q5JRX3-2	Presequence protease, mitochondrial OS=Homo sapiens GN=PITRM1 PE=1 SV=3|Isoform 2 of Presequence protease, mitochondrial OS=Homo sapiens GN=PITRM1	2	1	1	1	1	8	8	8	2	2	2	17	17	3	6.824005	7.5305	6.11751	TRUE	TRUE	TRUE	0.233258066	26.81424332	1.288681919	0.22494409	0.516391208	-5.456373568	0.528754962	1	1	FA_8_3_UV - FA_8_3_noUV	Huh7	limma	0.22494409	0.516391208	FALSE	no hit	7.5305
PSMB2	P49721	Proteasome subunit beta type-2 OS=Homo sapiens GN=PSMB2 PE=1 SV=1	2	1	1	1	1	8	8	8	2	2	2	3	3	2	6.387155	6.4477	6.32661	TRUE	TRUE	TRUE	-0.160529156	24.16594005	-1.287976663	0.225180474	0.516391208	-5.457198441	0.528980544	1	1	FA_8_3_UV - FA_8_3_noUV	Huh7	limma	0.225180474	0.516391208	FALSE	no hit	6.4477
DLAT	P10515	Dihydrolipoyllysine-residue acetyltransferase component of pyruvate dehydrogenase complex, mitochondrial OS=Homo sapiens GN=DLAT PE=1 SV=3	2	1	1	1	1	8	8	8	2	2	2	7	2	7	6.78449	6.8109	6.75808	TRUE	TRUE	TRUE	0.145907916	23.28938497	1.286076311	0.225818438	0.516391208	-5.459419496	0.529588631	1	1	FA_8_3_UV - FA_8_3_noUV	Huh7	limma	0.225818438	0.516391208	FALSE	no hit	6.8109
SF3A3	Q12874	Splicing factor 3A subunit 3 OS=Homo sapiens GN=SF3A3 PE=1 SV=1	2	1	1	1	1	8	8	8	2	2	2	4	4	3	6.19345	6.2391	6.1478	TRUE	TRUE	TRUE	0.235771411	23.33333994	1.284508245	0.226345962	0.516391208	-5.461250412	0.530090659	1	1	FA_8_3_UV - FA_8_3_noUV	Huh7	limma	0.226345962	0.516391208	FALSE	no hit	6.2391
TBRG4	Q969Z0|Q969Z0-2	Protein TBRG4 OS=Homo sapiens GN=TBRG4 PE=1 SV=1|Isoform 2 of Protein TBRG4 OS=Homo sapiens GN=TBRG4	1	1	NA	1	NA	8	8	NA	2	2	NA	2	2	NA	6.98889	6.98889	NA	TRUE	FALSE	TRUE	0.264234956	22.7466215	1.284051251	0.226499892	0.516391208	-5.461783708	0.530237014	1	1	FA_8_3_UV - FA_8_3_noUV	Huh7	limma	0.226499892	0.516391208	FALSE	no hit	6.98889
LSS	P48449|P48449-2|P48449-3	Lanosterol synthase OS=Homo sapiens GN=LSS PE=1 SV=1|Isoform 2 of Lanosterol synthase OS=Homo sapiens GN=LSS|Isoform 3 of Lanosterol synthase OS=Homo sapiens GN=LSS	1	1	NA	1	NA	8	8	NA	2	2	NA	4	4	NA	6.37684	6.37684	NA	TRUE	FALSE	TRUE	0.424986545	24.02877367	1.283141452	0.226806596	0.516391208	-5.462845005	0.530528445	1	1	FA_8_3_UV - FA_8_3_noUV	Huh7	limma	0.226806596	0.516391208	FALSE	no hit	6.37684
ADSL	P30566	Adenylosuccinate lyase OS=Homo sapiens GN=ADSL PE=1 SV=2	1	1	NA	1	NA	8	8	NA	2	2	NA	2	2	NA	5.95623	5.95623	NA	TRUE	FALSE	TRUE	-0.279679697	22.64031297	-1.282969752	0.226864517	0.516391208	-5.463045236	0.530583454	1	1	FA_8_3_UV - FA_8_3_noUV	Huh7	limma	0.226864517	0.516391208	FALSE	no hit	5.95623
YWHAG	P61981	14-3-3 protein gamma OS=Homo sapiens GN=YWHAG PE=1 SV=2	2	1	1	1	1	8	8	8	2	2	2	5	5	5	7.229035	7.46371	6.99436	TRUE	TRUE	TRUE	-0.32652756	25.4140645	-1.28084424	0.227582524	0.516729279	-5.465522333	0.531264659	1	1	FA_8_3_UV - FA_8_3_noUV	Huh7	limma	0.227582524	0.516729279	FALSE	no hit	7.46371
LAMC1	P11047	Laminin subunit gamma-1 OS=Homo sapiens GN=LAMC1 PE=1 SV=3	1	1	NA	1	NA	8	8	NA	2	2	NA	3	3	NA	6.20059	6.20059	NA	TRUE	FALSE	TRUE	0.143813766	23.42881738	1.27892293	0.228233148	0.516729279	-5.467758902	0.5318808	1	1	FA_8_3_UV - FA_8_3_noUV	Huh7	limma	0.228233148	0.516729279	FALSE	no hit	6.20059
VCP	P55072	Transitional endoplasmic reticulum ATPase OS=Homo sapiens GN=VCP PE=1 SV=4	2	1	1	1	1	8	8	8	2	2	2	22	22	11	7.230925	7.73713	6.72472	TRUE	TRUE	TRUE	-0.183544537	27.02447884	-1.278303854	0.228443112	0.516729279	-5.468479044	0.532079408	1	1	FA_8_3_UV - FA_8_3_noUV	Huh7	limma	0.228443112	0.516729279	FALSE	no hit	7.73713
TRIM28	Q13263|Q13263-2	Isoform 2 of Transcription intermediary factor 1-beta OS=Homo sapiens GN=TRIM28|Transcription intermediary factor 1-beta OS=Homo sapiens GN=TRIM28 PE=1 SV=5	2	1	1	1	1	8	8	8	2	2	2	6	4	6	6.792395	6.73216	6.85263	TRUE	TRUE	TRUE	-0.135491386	23.57720785	-1.277123748	0.22884379	0.516729279	-5.469851108	0.532458105	1	1	FA_8_3_UV - FA_8_3_noUV	Huh7	limma	0.22884379	0.516729279	FALSE	no hit	6.73216
ZYX	H0Y2Y8|Q15942|Q15942-2	Zyxin (Fragment) OS=Homo sapiens GN=ZYX PE=1 SV=1|Zyxin OS=Homo sapiens GN=ZYX PE=1 SV=1|Isoform 2 of Zyxin OS=Homo sapiens GN=ZYX	2	1	1	1	1	8	8	8	2	2	2	2	2	2	6.605105	6.60316	6.60705	TRUE	TRUE	TRUE	-0.40753875	23.12912552	-1.27525872	0.229478187	0.517127492	-5.472017637	0.533056873	1	1	FA_8_3_UV - FA_8_3_noUV	Huh7	limma	0.229478187	0.517127492	FALSE	no hit	6.60316
CYP3A5	P20815	Cytochrome P450 3A5 OS=Homo sapiens GN=CYP3A5 PE=1 SV=1	1	1	NA	1	NA	8	8	NA	2	2	NA	2	2	NA	5.63933	5.63933	NA	TRUE	FALSE	TRUE	0.2321622	22.95876198	1.273383491	0.230117499	0.517208036	-5.474193707	0.533659259	1	1	FA_8_3_UV - FA_8_3_noUV	Huh7	limma	0.230117499	0.517208036	FALSE	no hit	5.63933
LARS	Q9P2J5	Leucine--tRNA ligase, cytoplasmic OS=Homo sapiens GN=LARS PE=1 SV=2	1	1	NA	1	NA	8	8	NA	2	2	NA	15	15	NA	7.06297	7.06297	NA	TRUE	FALSE	TRUE	-0.132357389	26.22625582	-1.272218708	0.230515332	0.517208036	-5.475544188	0.534033599	1	1	FA_8_3_UV - FA_8_3_noUV	Huh7	limma	0.230515332	0.517208036	FALSE	no hit	7.06297
NAE1	Q13564|Q13564-2|Q13564-3|Q13564-4	NEDD8-activating enzyme E1 regulatory subunit OS=Homo sapiens GN=NAE1 PE=1 SV=1|Isoform 2 of NEDD8-activating enzyme E1 regulatory subunit OS=Homo sapiens GN=NAE1|Isoform 3 of NEDD8-activating enzyme E1 regulatory subunit OS=Homo sapiens GN=NAE1|Isoform 4 of NEDD8-activating enzyme E1 regulatory subunit OS=Homo sapiens GN=NAE1	2	1	1	1	1	8	8	8	2	2	2	3	2	3	6.347875	6.63291	6.06284	TRUE	TRUE	TRUE	-0.285948291	22.92490218	-1.268515138	0.231784015	0.517208036	-5.479832256	0.535224739	1	1	FA_8_3_UV - FA_8_3_noUV	Huh7	limma	0.231784015	0.517208036	FALSE	no hit	6.63291
SND1	Q7KZF4	Staphylococcal nuclease domain-containing protein 1 OS=Homo sapiens GN=SND1 PE=1 SV=1	2	1	1	1	1	8	8	8	2	2	2	16	12	16	7.19109	7.29052	7.09166	TRUE	TRUE	TRUE	0.253663044	26.35754633	1.267762568	0.232042506	0.517208036	-5.480702488	0.535466944	1	1	FA_8_3_UV - FA_8_3_noUV	Huh7	limma	0.232042506	0.517208036	FALSE	no hit	7.29052
CBR1	P16152	Carbonyl reductase [NADPH] 1 OS=Homo sapiens GN=CBR1 PE=1 SV=3	1	1	NA	1	NA	8	8	NA	2	2	NA	3	3	NA	6.40348	6.40348	NA	TRUE	FALSE	TRUE	-0.36756999	23.85607473	-1.267350289	0.232184215	0.517208036	-5.481179068	0.535599654	1	1	FA_8_3_UV - FA_8_3_noUV	Huh7	limma	0.232184215	0.517208036	FALSE	no hit	6.40348
CNPY3	A0A0C4DFY8|Q9BT09	Protein canopy homolog 3 OS=Homo sapiens GN=CNPY3 PE=1 SV=1	2	1	1	1	1	8	8	8	2	2	2	3	3	3	6.480605	6.54578	6.41543	TRUE	TRUE	TRUE	0.128734037	23.5996039	1.26712233	0.232262599	0.517208036	-5.481442531	0.53567304	1	1	FA_8_3_UV - FA_8_3_noUV	Huh7	limma	0.232262599	0.517208036	FALSE	no hit	6.54578
AP2M1	A0A087WY71|E9PFW3|Q96CW1|Q96CW1-2	AP-2 complex subunit mu OS=Homo sapiens GN=AP2M1 PE=1 SV=1|AP-2 complex subunit mu OS=Homo sapiens GN=AP2M1 PE=1 SV=1|AP-2 complex subunit mu OS=Homo sapiens GN=AP2M1 PE=1 SV=2|Isoform 2 of AP-2 complex subunit mu OS=Homo sapiens GN=AP2M1	1	1	NA	1	NA	8	8	NA	2	2	NA	4	4	NA	6.62964	6.62964	NA	TRUE	FALSE	TRUE	0.191037986	24.68797181	1.264945275	0.233012267	0.517765406	-5.483956927	0.536374143	1	1	FA_8_3_UV - FA_8_3_noUV	Huh7	limma	0.233012267	0.517765406	FALSE	no hit	6.62964
PSMA4	H0YN18|P25789|P25789-2	Isoform 2 of Proteasome subunit alpha type-4 OS=Homo sapiens GN=PSMA4|Proteasome subunit alpha type-4 OS=Homo sapiens GN=PSMA4 PE=1 SV=1	2	1	1	1	1	8	8	8	2	2	2	3	3	3	6.77307	6.93669	6.60945	TRUE	TRUE	TRUE	-0.188776107	24.28454376	-1.261707846	0.234130711	0.517765406	-5.487690191	0.537417584	1	1	FA_8_3_UV - FA_8_3_noUV	Huh7	limma	0.234130711	0.517765406	FALSE	no hit	6.93669
UGGT1	Q9NYU2|Q9NYU2-2	UDP-glucose:glycoprotein glucosyltransferase 1 OS=Homo sapiens GN=UGGT1 PE=1 SV=3|Isoform 2 of UDP-glucose:glycoprotein glucosyltransferase 1 OS=Homo sapiens GN=UGGT1	2	1	1	1	1	8	8	8	2	2	2	17	17	10	7.026915	7.55136	6.50247	TRUE	TRUE	TRUE	0.142567684	26.54072499	1.261575159	0.234176644	0.517765406	-5.487843051	0.537460372	1	1	FA_8_3_UV - FA_8_3_noUV	Huh7	limma	0.234176644	0.517765406	FALSE	no hit	7.55136
EIF4A3	P38919	Eukaryotic initiation factor 4A-III OS=Homo sapiens GN=EIF4A3 PE=1 SV=4	2	1	1	1	1	8	8	8	2	2	2	9	9	2	6.68447	7.41413	5.95481	TRUE	TRUE	TRUE	0.134996769	25.89230241	1.261082311	0.234347318	0.517765406	-5.488410728	0.537619315	1	1	FA_8_3_UV - FA_8_3_noUV	Huh7	limma	0.234347318	0.517765406	FALSE	no hit	7.41413
RCN2	Q14257|Q14257-2	Reticulocalbin-2 OS=Homo sapiens GN=RCN2 PE=1 SV=1|Isoform 2 of Reticulocalbin-2 OS=Homo sapiens GN=RCN2	2	1	1	1	1	8	8	8	2	2	2	10	10	3	7.233	7.86303	6.60297	TRUE	TRUE	TRUE	0.290084223	26.08081876	1.257484559	0.23559629	0.519508226	-5.492549826	0.538780305	1	1	FA_8_3_UV - FA_8_3_noUV	Huh7	limma	0.23559629	0.519508226	FALSE	no hit	7.86303
NUP188	Q5SRE5|Q5SRE5-2	Nucleoporin NUP188 homolog OS=Homo sapiens GN=NUP188 PE=1 SV=1|Isoform 2 of Nucleoporin NUP188 homolog OS=Homo sapiens GN=NUP188	1	1	NA	1	NA	8	8	NA	2	2	NA	6	6	NA	6.12986	6.12986	NA	TRUE	FALSE	TRUE	0.266787949	24.48629308	1.254259916	0.236720317	0.520969276	-5.496252337	0.539821959	1	1	FA_8_3_UV - FA_8_3_noUV	Huh7	limma	0.236720317	0.520969276	FALSE	no hit	6.12986
PA2G4	Q9UQ80|Q9UQ80-2	Proliferation-associated protein 2G4 OS=Homo sapiens GN=PA2G4 PE=1 SV=3|Isoform 2 of Proliferation-associated protein 2G4 OS=Homo sapiens GN=PA2G4	2	1	1	1	1	8	8	8	2	2	2	5	5	4	6.475885	6.6716	6.28017	TRUE	TRUE	TRUE	-0.142377838	24.67177874	-1.251584147	0.237656316	0.521465819	-5.499319359	0.540687076	1	1	FA_8_3_UV - FA_8_3_noUV	Huh7	limma	0.237656316	0.521465819	FALSE	no hit	6.6716
MSH2	E9PHA6|P43246|V9H019	DNA mismatch repair protein OS=Homo sapiens GN=MSH2 PE=1 SV=1|DNA mismatch repair protein Msh2 OS=Homo sapiens GN=MSH2 PE=1 SV=1|DNA mismatch repair protein Msh2 OS=Homo sapiens GN=MSH2 PE=1 SV=1	1	1	NA	1	NA	8	8	NA	2	2	NA	2	2	NA	6.35899	6.35899	NA	TRUE	FALSE	TRUE	-0.141166775	23.10193997	-1.247544304	0.239075149	0.521465819	-5.503940822	0.541994531	1	1	FA_8_3_UV - FA_8_3_noUV	Huh7	limma	0.239075149	0.521465819	FALSE	no hit	6.35899
ANXA5	P08758	Annexin A5 OS=Homo sapiens GN=ANXA5 PE=1 SV=2	2	1	1	1	1	8	8	8	2	2	2	8	6	8	7.035565	7.0758	6.99533	TRUE	TRUE	TRUE	-0.778432182	25.35797393	-1.246923033	0.239293952	0.521465819	-5.504650566	0.542195739	1	1	FA_8_3_UV - FA_8_3_noUV	Huh7	limma	0.239293952	0.521465819	FALSE	no hit	7.0758
HARS	B3KWE1|P12081|P12081-2|P12081-3|P12081-4	Histidine--tRNA ligase, cytoplasmic OS=Homo sapiens GN=HARS PE=1 SV=1|Histidine--tRNA ligase, cytoplasmic OS=Homo sapiens GN=HARS PE=1 SV=2|Isoform 2 of Histidine--tRNA ligase, cytoplasmic OS=Homo sapiens GN=HARS|Isoform 3 of Histidine--tRNA ligase, cytoplasmic OS=Homo sapiens GN=HARS|Isoform 4 of Histidine--tRNA ligase, cytoplasmic OS=Homo sapiens GN=HARS	1	1	NA	1	NA	8	8	NA	2	2	NA	2	2	NA	6.47442	6.47442	NA	TRUE	FALSE	TRUE	-0.273672344	23.41564257	-1.246649091	0.239390482	0.521465819	-5.504963437	0.542284471	1	1	FA_8_3_UV - FA_8_3_noUV	Huh7	limma	0.239390482	0.521465819	FALSE	no hit	6.47442
TOP2A	P11388|P11388-2|P11388-3|P11388-4	DNA topoisomerase 2-alpha OS=Homo sapiens GN=TOP2A PE=1 SV=3|Isoform 2 of DNA topoisomerase 2-alpha OS=Homo sapiens GN=TOP2A|Isoform 3 of DNA topoisomerase 2-alpha OS=Homo sapiens GN=TOP2A|Isoform 4 of DNA topoisomerase 2-alpha OS=Homo sapiens GN=TOP2A	1	1	NA	1	NA	8	8	NA	2	2	NA	5	5	NA	6.91492	6.91492	NA	TRUE	FALSE	TRUE	0.299997299	24.66022254	1.245841298	0.239675309	0.521465819	-5.505885727	0.542546164	1	1	FA_8_3_UV - FA_8_3_noUV	Huh7	limma	0.239675309	0.521465819	FALSE	no hit	6.91492
ENO3	P13929|P13929-2	Beta-enolase OS=Homo sapiens GN=ENO3 PE=1 SV=5|Isoform 2 of Beta-enolase OS=Homo sapiens GN=ENO3	1	1	NA	1	NA	8	8	NA	2	2	NA	2	2	NA	6.81701	6.81701	NA	TRUE	FALSE	TRUE	-0.300179957	23.29800858	-1.245722455	0.239717237	0.521465819	-5.506021379	0.542584669	1	1	FA_8_3_UV - FA_8_3_noUV	Huh7	limma	0.239717237	0.521465819	FALSE	no hit	6.81701
ATP5B	F8W0P7|P06576	ATP synthase subunit beta, mitochondrial (Fragment) OS=Homo sapiens GN=ATP5B PE=1 SV=2|ATP synthase subunit beta, mitochondrial OS=Homo sapiens GN=ATP5B PE=1 SV=3	2	1	1	1	1	8	8	8	2	2	2	18	16	18	7.98913	8.20821	7.77005	TRUE	TRUE	TRUE	0.172489952	27.28950456	1.238898262	0.242134728	0.525711745	-5.513794759	0.544798025	1	1	FA_8_3_UV - FA_8_3_noUV	Huh7	limma	0.242134728	0.525711745	FALSE	no hit	8.20821
CAND1	Q86VP6	Cullin-associated NEDD8-dissociated protein 1 OS=Homo sapiens GN=CAND1 PE=1 SV=2	1	1	NA	1	NA	8	8	NA	2	2	NA	13	13	NA	7.21639	7.21639	NA	TRUE	FALSE	TRUE	-0.148650857	25.91112852	-1.236429432	0.243014146	0.52605725	-5.516599236	0.545599867	1	1	FA_8_3_UV - FA_8_3_noUV	Huh7	limma	0.243014146	0.52605725	FALSE	no hit	7.21639
PSMB7	Q99436	Proteasome subunit beta type-7 OS=Homo sapiens GN=PSMB7 PE=1 SV=1	1	1	NA	1	NA	8	8	NA	2	2	NA	3	3	NA	6.64427	6.64427	NA	TRUE	FALSE	TRUE	-0.255423607	24.12906394	-1.232770454	0.244322236	0.52605725	-5.520748071	0.546789329	1	1	FA_8_3_UV - FA_8_3_noUV	Huh7	limma	0.244322236	0.52605725	FALSE	no hit	6.64427
NPM1	P06748|P06748-2	Nucleophosmin OS=Homo sapiens GN=NPM1 PE=1 SV=2|Isoform 2 of Nucleophosmin OS=Homo sapiens GN=NPM1	2	1	1	1	1	8	8	8	2	2	2	10	8	10	8.36829	8.70408	8.0325	TRUE	TRUE	TRUE	0.221813236	26.47973213	1.232703484	0.24434623	0.52605725	-5.520823923	0.546811112	1	1	FA_8_3_UV - FA_8_3_noUV	Huh7	limma	0.24434623	0.52605725	FALSE	no hit	8.70408
CHERP	J3QK89|Q8IWX8	Calcium homeostasis endoplasmic reticulum protein OS=Homo sapiens GN=CHERP PE=1 SV=1|Calcium homeostasis endoplasmic reticulum protein OS=Homo sapiens GN=CHERP PE=1 SV=3	2	1	1	1	1	8	8	8	2	2	2	6	6	2	6.392785	7.00818	5.77739	TRUE	TRUE	TRUE	0.180491953	25.20811612	1.231483272	0.24478375	0.52605725	-5.522205419	0.547208072	1	1	FA_8_3_UV - FA_8_3_noUV	Huh7	limma	0.24478375	0.52605725	FALSE	no hit	7.00818
PSME2	A0A087X1Z3|H0YM70|Q9UL46	Proteasome activator complex subunit 2 OS=Homo sapiens GN=PSME2 PE=1 SV=1|Proteasome activator complex subunit 2 OS=Homo sapiens GN=PSME2 PE=1 SV=1|Proteasome activator complex subunit 2 OS=Homo sapiens GN=PSME2 PE=1 SV=4	1	1	NA	1	NA	8	8	NA	2	2	NA	3	3	NA	6.74956	6.74956	NA	TRUE	FALSE	TRUE	-0.194099476	24.38085606	-1.230757269	0.245044365	0.52605725	-5.523026903	0.547444323	1	1	FA_8_3_UV - FA_8_3_noUV	Huh7	limma	0.245044365	0.52605725	FALSE	no hit	6.74956
DSTN	P60981|P60981-2	Destrin OS=Homo sapiens GN=DSTN PE=1 SV=3|Isoform 2 of Destrin OS=Homo sapiens GN=DSTN	1	1	NA	1	NA	8	8	NA	2	2	NA	3	3	NA	6.16379	6.16379	NA	TRUE	FALSE	TRUE	-0.204974123	23.36561117	-1.22942447	0.245523383	0.52605725	-5.524534054	0.547878166	1	1	FA_8_3_UV - FA_8_3_noUV	Huh7	limma	0.245523383	0.52605725	FALSE	no hit	6.16379
SKP1	E5RJR5|P63208	S-phase kinase-associated protein 1 OS=Homo sapiens GN=SKP1 PE=1 SV=1|S-phase kinase-associated protein 1 OS=Homo sapiens GN=SKP1 PE=1 SV=2	2	1	1	1	1	8	8	8	2	2	2	5	5	4	6.81682	7.04515	6.58849	TRUE	TRUE	TRUE	-0.269340602	24.62669691	-1.229335155	0.24555551	0.52605725	-5.524635009	0.547907245	1	1	FA_8_3_UV - FA_8_3_noUV	Huh7	limma	0.24555551	0.52605725	FALSE	no hit	7.04515
RAB11A|RAB11B	H3BMH2|H3BSC1|P62491|P62491-2|Q15907|Q15907-2	Ras-related protein Rab-11A (Fragment) OS=Homo sapiens GN=RAB11A PE=4 SV=1|Ras-related protein Rab-11A OS=Homo sapiens GN=RAB11A PE=1 SV=1|Ras-related protein Rab-11A OS=Homo sapiens GN=RAB11A PE=1 SV=3|Isoform 2 of Ras-related protein Rab-11A OS=Homo sapiens GN=RAB11A|Ras-related protein Rab-11B OS=Homo sapiens GN=RAB11B PE=1 SV=4|Isoform 2 of Ras-related protein Rab-11B OS=Homo sapiens GN=RAB11B	1	1	NA	1	NA	8	8	NA	2	2	NA	2	2	NA	6.18292	6.18292	NA	TRUE	FALSE	TRUE	-0.153845482	22.3327305	-1.214353802	0.250992382	0.536055908	-5.541491805	0.552795646	1	1	FA_8_3_UV - FA_8_3_noUV	Huh7	limma	0.250992382	0.536055908	FALSE	no hit	6.18292
ILF2	B4DY09|Q12905	Interleukin enhancer-binding factor 2 OS=Homo sapiens GN=ILF2 PE=1 SV=1|Interleukin enhancer-binding factor 2 OS=Homo sapiens GN=ILF2 PE=1 SV=2	2	1	1	1	1	8	8	8	2	2	2	11	7	11	7.3735	7.58944	7.15756	TRUE	TRUE	TRUE	0.248144998	25.90214142	1.21386238	0.251172343	0.536055908	-5.542042139	0.552956358	1	1	FA_8_3_UV - FA_8_3_noUV	Huh7	limma	0.251172343	0.536055908	FALSE	no hit	7.58944
ADH5	P11766	Alcohol dehydrogenase class-3 OS=Homo sapiens GN=ADH5 PE=1 SV=4	2	1	1	1	1	8	8	8	2	2	2	3	2	3	5.999045	6.03194	5.96615	TRUE	TRUE	TRUE	-0.291938943	23.18737424	-1.209505171	0.252772489	0.538453094	-5.54691442	0.554382319	1	1	FA_8_3_UV - FA_8_3_noUV	Huh7	limma	0.252772489	0.538453094	FALSE	no hit	6.03194
POFUT2	Q9Y2G5	GDP-fucose protein O-fucosyltransferase 2 OS=Homo sapiens GN=POFUT2 PE=1 SV=3	1	1	NA	1	NA	8	8	NA	2	2	NA	6	6	NA	7.11097	7.11097	NA	TRUE	FALSE	TRUE	0.243112532	24.99475582	1.206047978	0.254047895	0.540150798	-5.550770971	0.555515015	1	1	FA_8_3_UV - FA_8_3_noUV	Huh7	limma	0.254047895	0.540150798	FALSE	no hit	7.11097
ATP6V1A	P38606|P38606-2	V-type proton ATPase catalytic subunit A OS=Homo sapiens GN=ATP6V1A PE=1 SV=2|Isoform 2 of V-type proton ATPase catalytic subunit A OS=Homo sapiens GN=ATP6V1A	2	1	1	1	1	8	8	8	2	2	2	8	8	2	6.901065	7.33659	6.46554	TRUE	TRUE	TRUE	0.132585433	25.64069835	1.203972482	0.254816037	0.540765612	-5.553082246	0.556195561	1	1	FA_8_3_UV - FA_8_3_noUV	Huh7	limma	0.254816037	0.540765612	FALSE	no hit	7.33659
CUL3	Q13618|Q13618-2	Cullin-3 OS=Homo sapiens GN=CUL3 PE=1 SV=2|Isoform 2 of Cullin-3 OS=Homo sapiens GN=CUL3	1	1	NA	1	NA	8	8	NA	2	2	NA	5	5	NA	6.97096	6.97096	NA	TRUE	FALSE	TRUE	-0.141971844	23.9171607	-1.199516342	0.256471509	0.543257661	-5.558034521	0.557658084	1	1	FA_8_3_UV - FA_8_3_noUV	Huh7	limma	0.256471509	0.543257661	FALSE	no hit	6.97096
GRPEL1	Q9HAV7	GrpE protein homolog 1, mitochondrial OS=Homo sapiens GN=GRPEL1 PE=1 SV=2	2	1	1	1	1	8	8	8	2	2	2	5	2	5	6.565685	6.5518	6.57957	TRUE	TRUE	TRUE	-0.169573622	23.05940475	-1.197173591	0.257345276	0.544087671	-5.560632575	0.558427734	1	1	FA_8_3_UV - FA_8_3_noUV	Huh7	limma	0.257345276	0.544087671	FALSE	no hit	6.5518
CDK2	G3V5T9|P24941|P24941-2	Cyclin-dependent kinase 2 OS=Homo sapiens GN=CDK2 PE=1 SV=1|Cyclin-dependent kinase 2 OS=Homo sapiens GN=CDK2 PE=1 SV=2|Isoform 2 of Cyclin-dependent kinase 2 OS=Homo sapiens GN=CDK2	1	1	NA	1	NA	8	8	NA	2	2	NA	2	2	NA	6.25802	6.25802	NA	TRUE	FALSE	TRUE	-0.177123857	22.82026486	-1.191675795	0.259405063	0.547417413	-5.566714479	0.560235917	1	1	FA_8_3_UV - FA_8_3_noUV	Huh7	limma	0.259405063	0.547417413	FALSE	no hit	6.25802
NAA16	Q6N069	N-alpha-acetyltransferase 16, NatA auxiliary subunit OS=Homo sapiens GN=NAA16 PE=1 SV=2	1	1	NA	1	NA	8	8	NA	2	2	NA	2	2	NA	7.12303	7.12303	NA	TRUE	FALSE	TRUE	0.127114305	24.30431517	1.190068717	0.260009632	0.547669542	-5.568488314	0.560765008	1	1	FA_8_3_UV - FA_8_3_noUV	Huh7	limma	0.260009632	0.547669542	FALSE	no hit	7.12303
NDUFV1	B4DE93|G3V0I5|P49821|P49821-2	NADH dehydrogenase [ubiquinone] flavoprotein 1, mitochondrial OS=Homo sapiens GN=NDUFV1 PE=1 SV=1|NADH dehydrogenase (Ubiquinone) flavoprotein 1, 51kDa, isoform CRA_c OS=Homo sapiens GN=NDUFV1 PE=1 SV=1|NADH dehydrogenase [ubiquinone] flavoprotein 1, mitochondrial OS=Homo sapiens GN=NDUFV1 PE=1 SV=4|Isoform 2 of NADH dehydrogenase [ubiquinone] flavoprotein 1, mitochondrial OS=Homo sapiens GN=NDUF…	1	1	NA	1	NA	8	8	NA	2	2	NA	5	5	NA	6.74728	6.74728	NA	TRUE	FALSE	TRUE	0.14990918	24.32017063	1.179198309	0.264128366	0.554720926	-5.580439123	0.564350162	1	1	FA_8_3_UV - FA_8_3_noUV	Huh7	limma	0.264128366	0.554720926	FALSE	no hit	6.74728
HIST1H4A	P62805	Histone H4 OS=Homo sapiens GN=HIST1H4A PE=1 SV=2	2	1	1	1	1	8	8	8	2	2	2	7	6	7	8.179005	8.04181	8.3162	TRUE	TRUE	TRUE	0.201892227	25.69872852	1.178643389	0.264339998	0.554720926	-5.581046966	0.564533474	1	1	FA_8_3_UV - FA_8_3_noUV	Huh7	limma	0.264339998	0.554720926	FALSE	no hit	8.04181
H6PD	O95479|R4GMU1	GDH/6PGL endoplasmic bifunctional protein OS=Homo sapiens GN=H6PD PE=1 SV=2|GDH/6PGL endoplasmic bifunctional protein OS=Homo sapiens GN=H6PD PE=1 SV=1	1	1	NA	1	NA	8	8	NA	2	2	NA	5	5	NA	6.66433	6.66433	NA	TRUE	FALSE	TRUE	0.187176949	24.4388646	1.173817721	0.266186037	0.55642457	-5.586323703	0.566128799	1	1	FA_8_3_UV - FA_8_3_noUV	Huh7	limma	0.266186037	0.55642457	FALSE	no hit	6.66433
PPP1R7	C9J177|C9JD73|Q15435|Q15435-2|Q15435-3|Q15435-4|Q15435-5	Isoform 2 of Protein phosphatase 1 regulatory subunit 7 OS=Homo sapiens GN=PPP1R7|Isoform 3 of Protein phosphatase 1 regulatory subunit 7 OS=Homo sapiens GN=PPP1R7|Isoform 4 of Protein phosphatase 1 regulatory subunit 7 OS=Homo sapiens GN=PPP1R7|Isoform 5 of Protein phosphatase 1 regulatory subunit 7 OS=Homo sapiens GN=PPP1R7|Protein phosphatase 1 regulatory subunit 7 (Fragment) OS=Homo sapiens G…	2	1	1	1	1	8	8	8	2	2	2	3	3	3	6.427715	6.59595	6.25948	TRUE	TRUE	TRUE	-0.359191245	24.36167982	-1.173209683	0.26641936	0.55642457	-5.586987409	0.566329964	1	1	FA_8_3_UV - FA_8_3_noUV	Huh7	limma	0.26641936	0.55642457	FALSE	no hit	6.59595
OLA1	J3KQ32|Q9NTK5	Obg-like ATPase 1 OS=Homo sapiens GN=OLA1 PE=1 SV=1|Obg-like ATPase 1 OS=Homo sapiens GN=OLA1 PE=1 SV=2	2	1	1	1	1	8	8	8	2	2	2	2	2	2	6.241645	6.42577	6.05752	TRUE	TRUE	TRUE	-0.134617984	23.34834422	-1.17266014	0.266630374	0.55642457	-5.587587039	0.566511806	1	1	FA_8_3_UV - FA_8_3_noUV	Huh7	limma	0.266630374	0.55642457	FALSE	no hit	6.42577
HNRNPA2B1	P22626	Heterogeneous nuclear ribonucleoproteins A2/B1 OS=Homo sapiens GN=HNRNPA2B1 PE=1 SV=2	2	1	1	1	1	8	8	8	2	2	2	11	4	11	7.56668	7.47901	7.65435	TRUE	TRUE	TRUE	0.186168044	25.17149151	1.169605078	0.267805867	0.557129615	-5.590916647	0.567523228	1	1	FA_8_3_UV - FA_8_3_noUV	Huh7	limma	0.267805867	0.557129615	FALSE	no hit	7.47901
BCAT1	P54687|P54687-3|P54687-4|P54687-5	Branched-chain-amino-acid aminotransferase, cytosolic OS=Homo sapiens GN=BCAT1 PE=1 SV=3|Isoform 3 of Branched-chain-amino-acid aminotransferase, cytosolic OS=Homo sapiens GN=BCAT1|Isoform 4 of Branched-chain-amino-acid aminotransferase, cytosolic OS=Homo sapiens GN=BCAT1|Isoform 5 of Branched-chain-amino-acid aminotransferase, cytosolic OS=Homo sapiens GN=BCAT1	2	1	1	1	1	8	8	8	2	2	2	3	3	2	6.2603	6.33848	6.18212	TRUE	TRUE	TRUE	-0.411617724	23.64520039	-1.169217815	0.267955165	0.557129615	-5.59133824	0.567651499	1	1	FA_8_3_UV - FA_8_3_noUV	Huh7	limma	0.267955165	0.557129615	FALSE	no hit	6.33848
HNRNPA3	P51991|P51991-2	Heterogeneous nuclear ribonucleoprotein A3 OS=Homo sapiens GN=HNRNPA3 PE=1 SV=2|Isoform 2 of Heterogeneous nuclear ribonucleoprotein A3 OS=Homo sapiens GN=HNRNPA3	2	1	1	1	1	8	8	8	2	2	2	4	4	4	7.016955	7.03266	7.00125	TRUE	TRUE	TRUE	0.129263416	24.15681121	1.165212213	0.269503253	0.558620859	-5.595692671	0.568979063	1	1	FA_8_3_UV - FA_8_3_noUV	Huh7	limma	0.269503253	0.558620859	FALSE	no hit	7.03266
ACAA2	A0A0B4J2A4|P42765	3-ketoacyl-CoA thiolase, mitochondrial OS=Homo sapiens GN=ACAA2 PE=1 SV=1|3-ketoacyl-CoA thiolase, mitochondrial OS=Homo sapiens GN=ACAA2 PE=1 SV=2	2	1	1	1	1	8	8	8	2	2	2	3	2	3	6.48527	6.78756	6.18298	TRUE	TRUE	TRUE	0.189719193	23.1665058	1.164802556	0.269661974	0.558620859	-5.59613736	0.569114918	1	1	FA_8_3_UV - FA_8_3_noUV	Huh7	limma	0.269661974	0.558620859	FALSE	no hit	6.78756
EIF3F	O00303	Eukaryotic translation initiation factor 3 subunit F OS=Homo sapiens GN=EIF3F PE=1 SV=1	1	1	NA	1	NA	8	8	NA	2	2	NA	4	4	NA	6.54875	6.54875	NA	TRUE	FALSE	TRUE	-0.147755077	23.6763675	-1.158798583	0.271996634	0.558835897	-5.602641044	0.571107795	1	1	FA_8_3_UV - FA_8_3_noUV	Huh7	limma	0.271996634	0.558835897	FALSE	no hit	6.54875
RPS5	M0QZN2|M0R0F0|M0R0R2|P46782	40S ribosomal protein S5 OS=Homo sapiens GN=RPS5 PE=1 SV=1|40S ribosomal protein S5 (Fragment) OS=Homo sapiens GN=RPS5 PE=1 SV=1|40S ribosomal protein S5 OS=Homo sapiens GN=RPS5 PE=1 SV=1|40S ribosomal protein S5 OS=Homo sapiens GN=RPS5 PE=1 SV=4	2	1	1	1	1	8	8	8	2	2	2	2	2	2	6.56233	6.49956	6.6251	TRUE	TRUE	TRUE	-0.161892635	23.74213852	-1.15687614	0.272747524	0.558835897	-5.604718052	0.571746606	1	1	FA_8_3_UV - FA_8_3_noUV	Huh7	limma	0.272747524	0.558835897	FALSE	no hit	6.49956
PRPF19	Q9UMS4	Pre-mRNA-processing factor 19 OS=Homo sapiens GN=PRPF19 PE=1 SV=1	2	1	1	1	1	8	8	8	2	2	2	6	6	4	7.114785	7.42254	6.80703	TRUE	TRUE	TRUE	0.149643444	25.33166042	1.156597035	0.272856675	0.558835897	-5.605019377	0.571839379	1	1	FA_8_3_UV - FA_8_3_noUV	Huh7	limma	0.272856675	0.558835897	FALSE	no hit	7.42254
PYGB	P11216	Glycogen phosphorylase, brain form OS=Homo sapiens GN=PYGB PE=1 SV=5	1	1	NA	1	NA	8	8	NA	2	2	NA	6	6	NA	6.7859	6.7859	NA	TRUE	FALSE	TRUE	-0.172336832	24.7034225	-1.155889805	0.273133409	0.558835897	-5.605782662	0.572074489	1	1	FA_8_3_UV - FA_8_3_noUV	Huh7	limma	0.273133409	0.558835897	FALSE	no hit	6.7859
ESD	H7BZT7|P10768|U3KQT1|X6RA14	S-formylglutathione hydrolase (Fragment) OS=Homo sapiens GN=ESD PE=1 SV=1|S-formylglutathione hydrolase OS=Homo sapiens GN=ESD PE=1 SV=2|S-formylglutathione hydrolase (Fragment) OS=Homo sapiens GN=ESD PE=1 SV=1|S-formylglutathione hydrolase OS=Homo sapiens GN=ESD PE=1 SV=1	1	1	NA	1	NA	8	8	NA	2	2	NA	2	2	NA	6.2049	6.2049	NA	TRUE	FALSE	TRUE	-0.350126916	23.16807622	-1.155125093	0.273432883	0.558835897	-5.606607582	0.572328759	1	1	FA_8_3_UV - FA_8_3_noUV	Huh7	limma	0.273432883	0.558835897	FALSE	no hit	6.2049
SEH1L	Q96EE3|Q96EE3-1	Nucleoporin SEH1 OS=Homo sapiens GN=SEH1L PE=1 SV=3|Isoform B of Nucleoporin SEH1 OS=Homo sapiens GN=SEH1L	1	1	NA	1	NA	8	8	NA	2	2	NA	3	3	NA	6.88173	6.88173	NA	TRUE	FALSE	TRUE	0.118393988	24.29119332	1.154286562	0.273761561	0.558835897	-5.607511651	0.572607637	1	1	FA_8_3_UV - FA_8_3_noUV	Huh7	limma	0.273761561	0.558835897	FALSE	no hit	6.88173
ALDH6A1	Q02252|Q02252-2	Methylmalonate-semialdehyde dehydrogenase [acylating], mitochondrial OS=Homo sapiens GN=ALDH6A1 PE=1 SV=2|Isoform 2 of Methylmalonate-semialdehyde dehydrogenase [acylating], mitochondrial OS=Homo sapiens GN=ALDH6A1	1	1	NA	1	NA	8	8	NA	2	2	NA	3	3	NA	6.47871	6.47871	NA	TRUE	FALSE	TRUE	0.157371532	23.86628108	1.154190929	0.273799065	0.558835897	-5.607614727	0.572639447	1	1	FA_8_3_UV - FA_8_3_noUV	Huh7	limma	0.273799065	0.558835897	FALSE	no hit	6.47871
LTA4H	P09960|P09960-4	Leukotriene A-4 hydrolase OS=Homo sapiens GN=LTA4H PE=1 SV=2|Isoform 4 of Leukotriene A-4 hydrolase OS=Homo sapiens GN=LTA4H	2	1	1	1	1	8	8	8	2	2	2	2	2	2	6.56127	6.83487	6.28767	TRUE	TRUE	TRUE	-0.246119232	24.03086676	-1.152882592	0.274312566	0.558835897	-5.609024225	0.573074712	1	1	FA_8_3_UV - FA_8_3_noUV	Huh7	limma	0.274312566	0.558835897	FALSE	no hit	6.83487
CFL1	P23528	Cofilin-1 OS=Homo sapiens GN=CFL1 PE=1 SV=3	2	1	1	1	1	8	8	8	2	2	2	8	7	8	7.21989	7.24355	7.19623	TRUE	TRUE	TRUE	-0.18874281	25.35732764	-1.151336822	0.274920225	0.558835897	-5.61068793	0.573589171	1	1	FA_8_3_UV - FA_8_3_noUV	Huh7	limma	0.274920225	0.558835897	FALSE	no hit	7.24355
CORO1C	Q9ULV4|Q9ULV4-2|Q9ULV4-3	Coronin-1C OS=Homo sapiens GN=CORO1C PE=1 SV=1|Isoform 2 of Coronin-1C OS=Homo sapiens GN=CORO1C|Isoform 3 of Coronin-1C OS=Homo sapiens GN=CORO1C	2	1	1	1	1	8	8	8	2	2	2	6	6	6	6.83273	7.19016	6.4753	TRUE	TRUE	TRUE	0.134600679	25.3861627	1.150954381	0.27507073	0.558835897	-5.611099285	0.573716487	1	1	FA_8_3_UV - FA_8_3_noUV	Huh7	limma	0.27507073	0.558835897	FALSE	no hit	7.19016
GPI	A0A0A0MTS2|K7EQ48|P06744|P06744-2	Glucose-6-phosphate isomerase (Fragment) OS=Homo sapiens GN=GPI PE=1 SV=1|Glucose-6-phosphate isomerase OS=Homo sapiens GN=GPI PE=1 SV=2|Glucose-6-phosphate isomerase OS=Homo sapiens GN=GPI PE=1 SV=4|Isoform 2 of Glucose-6-phosphate isomerase OS=Homo sapiens GN=GPI	2	1	1	1	1	8	8	8	2	2	2	10	10	7	7.334225	7.87956	6.78889	TRUE	TRUE	TRUE	-0.311729144	26.29375255	-1.150599128	0.275210593	0.558835897	-5.611481303	0.573834765	1	1	FA_8_3_UV - FA_8_3_noUV	Huh7	limma	0.275210593	0.558835897	FALSE	no hit	7.87956
MYL12A|MYL12B	J3QRS3|O14950|P19105	Myosin regulatory light chain 12A OS=Homo sapiens GN=MYL12A PE=1 SV=1|Myosin regulatory light chain 12B OS=Homo sapiens GN=MYL12B PE=1 SV=2|Myosin regulatory light chain 12A OS=Homo sapiens GN=MYL12A PE=1 SV=2	1	1	NA	1	NA	8	8	NA	2	2	NA	2	2	NA	7.08602	7.08602	NA	TRUE	FALSE	TRUE	-0.28545515	24.60065639	-1.148365744	0.276091147	0.559617424	-5.613880868	0.57457861	1	1	FA_8_3_UV - FA_8_3_noUV	Huh7	limma	0.276091147	0.559617424	FALSE	no hit	7.08602
CAPN1	P07384	Calpain-1 catalytic subunit OS=Homo sapiens GN=CAPN1 PE=1 SV=1	1	1	NA	1	NA	8	8	NA	2	2	NA	4	4	NA	5.93285	5.93285	NA	TRUE	FALSE	TRUE	-0.182608821	23.64984205	-1.144879801	0.277469947	0.561404247	-5.617619016	0.57574054	1	1	FA_8_3_UV - FA_8_3_noUV	Huh7	limma	0.277469947	0.561404247	FALSE	no hit	5.93285
CALR	P27797	Calreticulin OS=Homo sapiens GN=CALR PE=1 SV=1	2	1	1	1	1	8	8	8	2	2	2	24	19	24	8.752475	8.97083	8.53412	TRUE	TRUE	TRUE	-0.325165145	27.90163873	-1.141413441	0.278846325	0.561857776	-5.621327473	0.576897042	1	1	FA_8_3_UV - FA_8_3_noUV	Huh7	limma	0.278846325	0.561857776	FALSE	no hit	8.97083
TBCD	J3KR97|Q9BTW9|Q9BTW9-4|Q9BTW9-5	Tubulin-specific chaperone D OS=Homo sapiens GN=TBCD PE=1 SV=1|Tubulin-specific chaperone D OS=Homo sapiens GN=TBCD PE=1 SV=2|Isoform 4 of Tubulin-specific chaperone D OS=Homo sapiens GN=TBCD|Isoform 5 of Tubulin-specific chaperone D OS=Homo sapiens GN=TBCD	1	1	NA	1	NA	8	8	NA	2	2	NA	2	2	NA	6.50045	6.50045	NA	TRUE	FALSE	TRUE	0.304779408	23.23225816	1.140909501	0.279046866	0.561857776	-5.621865886	0.577065265	1	1	FA_8_3_UV - FA_8_3_noUV	Huh7	limma	0.279046866	0.561857776	FALSE	no hit	6.50045
ABCF2	Q9UG63|Q9UG63-2	ATP-binding cassette sub-family F member 2 OS=Homo sapiens GN=ABCF2 PE=1 SV=2|Isoform 2 of ATP-binding cassette sub-family F member 2 OS=Homo sapiens GN=ABCF2	1	1	NA	1	NA	8	8	NA	2	2	NA	3	3	NA	6.34501	6.34501	NA	TRUE	FALSE	TRUE	-0.164322155	23.91337271	-1.139987884	0.27941391	0.561857776	-5.622850074	0.577372976	1	1	FA_8_3_UV - FA_8_3_noUV	Huh7	limma	0.27941391	0.561857776	FALSE	no hit	6.34501
PSMC2	P35998	26S protease regulatory subunit 7 OS=Homo sapiens GN=PSMC2 PE=1 SV=3	2	1	1	1	1	8	8	8	2	2	2	6	6	2	6.345145	6.49231	6.19798	TRUE	TRUE	TRUE	-0.124236264	24.52920763	-1.139308459	0.279684739	0.561857776	-5.623575232	0.577599873	1	1	FA_8_3_UV - FA_8_3_noUV	Huh7	limma	0.279684739	0.561857776	FALSE	no hit	6.49231
GOLGA2	A0A0C4DGS5|Q08379	Golgi autoantigen, golgin subfamily a, 2, isoform CRA_a OS=Homo sapiens GN=GOLGA2 PE=1 SV=1|Golgin subfamily A member 2 OS=Homo sapiens GN=GOLGA2 PE=1 SV=3	2	1	1	1	1	8	8	8	2	2	2	10	5	10	6.708005	6.91046	6.50555	TRUE	TRUE	TRUE	0.180961754	25.04503544	1.137864282	0.28026109	0.562015578	-5.62511551	0.578082301	1	1	FA_8_3_UV - FA_8_3_noUV	Huh7	limma	0.28026109	0.562015578	FALSE	no hit	6.91046
9-Sep	K7EL40|Q9UHD8|Q9UHD8-2|Q9UHD8-3|Q9UHD8-4|Q9UHD8-5|Q9UHD8-7|Q9UHD8-8|Q9UHD8-9	Septin-9 (Fragment) OS=Homo sapiens GN=SEPT9 PE=1 SV=1|Septin-9 OS=Homo sapiens GN=SEPT9 PE=1 SV=2|Isoform 2 of Septin-9 OS=Homo sapiens GN=SEPT9|Isoform 3 of Septin-9 OS=Homo sapiens GN=SEPT9|Isoform 4 of Septin-9 OS=Homo sapiens GN=SEPT9|Isoform 5 of Septin-9 OS=Homo sapiens GN=SEPT9|Isoform 7 of Septin-9 OS=Homo sapiens GN=SEPT9|Isoform 8 of Septin-9 OS=Homo sapiens GN=SEPT9|Isoform 9 of Septi…	1	1	NA	1	NA	8	8	NA	2	2	NA	3	3	NA	6.23141	6.23141	NA	TRUE	FALSE	TRUE	-0.165222759	22.99157372	-1.133240241	0.282112699	0.563441103	-5.630037074	0.579628239	1	1	FA_8_3_UV - FA_8_3_noUV	Huh7	limma	0.282112699	0.563441103	FALSE	no hit	6.23141
PRPF8	Q6P2Q9	Pre-mRNA-processing-splicing factor 8 OS=Homo sapiens GN=PRPF8 PE=1 SV=2	1	1	NA	1	NA	8	8	NA	2	2	NA	20	20	NA	6.94403	6.94403	NA	TRUE	FALSE	TRUE	0.147924864	26.7385816	1.132046032	0.28259244	0.563441103	-5.631305599	0.58002781	1	1	FA_8_3_UV - FA_8_3_noUV	Huh7	limma	0.28259244	0.563441103	FALSE	no hit	6.94403
CAT	P04040	Catalase OS=Homo sapiens GN=CAT PE=1 SV=3	2	1	1	1	1	8	8	8	2	2	2	10	4	10	6.81156	6.79701	6.82611	TRUE	TRUE	TRUE	0.274720755	23.70508551	1.131304579	0.282890616	0.563441103	-5.63209267	0.580275957	1	1	FA_8_3_UV - FA_8_3_noUV	Huh7	limma	0.282890616	0.563441103	FALSE	no hit	6.79701
ABR	A0A0G2JQ41|Q12979|Q12979-2|Q12979-4	Active breakpoint cluster region-related protein (Fragment) OS=Homo sapiens GN=ABR PE=1 SV=1|Active breakpoint cluster region-related protein OS=Homo sapiens GN=ABR PE=2 SV=2|Isoform Short of Active breakpoint cluster region-related protein OS=Homo sapiens GN=ABR|Isoform 4 of Active breakpoint cluster region-related protein OS=Homo sapiens GN=ABR	1	1	NA	1	NA	8	8	NA	2	2	NA	9	9	NA	6.73658	6.73658	NA	TRUE	FALSE	TRUE	0.141894035	25.3666155	1.129528	0.283606066	0.563441103	-5.633976926	0.580870741	1	1	FA_8_3_UV - FA_8_3_noUV	Huh7	limma	0.283606066	0.563441103	FALSE	no hit	6.73658
BASP1	P80723	Brain acid soluble protein 1 OS=Homo sapiens GN=BASP1 PE=1 SV=2	1	1	NA	1	NA	8	8	NA	2	2	NA	2	2	NA	6.51217	6.51217	NA	TRUE	FALSE	TRUE	-0.204626747	23.40128453	-1.129031132	0.283806412	0.563441103	-5.634503497	0.581037139	1	1	FA_8_3_UV - FA_8_3_noUV	Huh7	limma	0.283806412	0.563441103	FALSE	no hit	6.51217
PSMD1	A0A087WW66|Q99460	26S proteasome non-ATPase regulatory subunit 1 OS=Homo sapiens GN=PSMD1 PE=1 SV=1|26S proteasome non-ATPase regulatory subunit 1 OS=Homo sapiens GN=PSMD1 PE=1 SV=2	1	1	NA	1	NA	8	8	NA	2	2	NA	9	9	NA	6.84936	6.84936	NA	TRUE	FALSE	TRUE	-0.127135559	25.75317892	-1.12863472	0.283966331	0.563441103	-5.634923479	0.581169911	1	1	FA_8_3_UV - FA_8_3_noUV	Huh7	limma	0.283966331	0.563441103	FALSE	no hit	6.84936
ARMT1	Q9H993	Protein-glutamate O-methyltransferase OS=Homo sapiens GN=ARMT1 PE=1 SV=1	2	1	1	1	1	8	8	8	2	2	2	5	5	3	6.648205	7.07093	6.22548	TRUE	TRUE	TRUE	-0.235843136	25.17632472	-1.126343486	0.284892021	0.563762741	-5.637348692	0.581937602	1	1	FA_8_3_UV - FA_8_3_noUV	Huh7	limma	0.284892021	0.563762741	FALSE	no hit	7.07093
MTA1	E7ESY4|Q13330|Q13330-3	Metastasis-associated protein MTA1 OS=Homo sapiens GN=MTA1 PE=1 SV=1|Metastasis-associated protein MTA1 OS=Homo sapiens GN=MTA1 PE=1 SV=2|Isoform 3 of Metastasis-associated protein MTA1 OS=Homo sapiens GN=MTA1	1	1	NA	1	NA	8	8	NA	2	2	NA	2	2	NA	6.07868	6.07868	NA	TRUE	FALSE	TRUE	0.344502239	22.79092848	1.125762484	0.285127126	0.563762741	-5.637963059	0.582132346	1	1	FA_8_3_UV - FA_8_3_noUV	Huh7	limma	0.285127126	0.563762741	FALSE	no hit	6.07868
SPATA20	A0A0U1RRL8|Q8TB22|Q8TB22-2|Q8TB22-3	Spermatogenesis-associated protein 20 OS=Homo sapiens GN=SPATA20 PE=1 SV=1|Spermatogenesis-associated protein 20 OS=Homo sapiens GN=SPATA20 PE=2 SV=3|Isoform 2 of Spermatogenesis-associated protein 20 OS=Homo sapiens GN=SPATA20|Isoform 3 of Spermatogenesis-associated protein 20 OS=Homo sapiens GN=SPATA20	1	1	NA	1	NA	8	8	NA	2	2	NA	2	2	NA	6.24019	6.24019	NA	TRUE	FALSE	TRUE	0.15045118	23.62632285	1.120886376	0.287106189	0.566448642	-5.643109457	0.583767945	1	1	FA_8_3_UV - FA_8_3_noUV	Huh7	limma	0.287106189	0.566448642	FALSE	no hit	6.24019
HCFC1	A6NEM2|P51610|P51610-2|P51610-4	Host cell factor 1 OS=Homo sapiens GN=HCFC1 PE=1 SV=2|Host cell factor 1 OS=Homo sapiens GN=HCFC1 PE=1 SV=2|Isoform 2 of Host cell factor 1 OS=Homo sapiens GN=HCFC1|Isoform 4 of Host cell factor 1 OS=Homo sapiens GN=HCFC1	1	1	NA	1	NA	8	8	NA	2	2	NA	3	3	NA	6.34916	6.34916	NA	TRUE	FALSE	TRUE	0.173131386	23.97900963	1.118280198	0.288168307	0.566448642	-5.645852958	0.584643015	1	1	FA_8_3_UV - FA_8_3_noUV	Huh7	limma	0.288168307	0.566448642	FALSE	no hit	6.34916
PSMD5	Q16401|Q16401-2	26S proteasome non-ATPase regulatory subunit 5 OS=Homo sapiens GN=PSMD5 PE=1 SV=3|Isoform 2 of 26S proteasome non-ATPase regulatory subunit 5 OS=Homo sapiens GN=PSMD5	1	1	NA	1	NA	8	8	NA	2	2	NA	2	2	NA	6.06163	6.06163	NA	TRUE	FALSE	TRUE	-0.160520695	22.77042924	-1.117211408	0.288604757	0.566448642	-5.646976623	0.585002056	1	1	FA_8_3_UV - FA_8_3_noUV	Huh7	limma	0.288604757	0.566448642	FALSE	no hit	6.06163
RABGGTB	P53611	Geranylgeranyl transferase type-2 subunit beta OS=Homo sapiens GN=RABGGTB PE=1 SV=2	1	1	NA	1	NA	8	8	NA	2	2	NA	3	3	NA	6.00565	6.00565	NA	TRUE	FALSE	TRUE	-0.224830021	23.81776904	-1.115083909	0.289475061	0.566448642	-5.649210856	0.585717058	1	1	FA_8_3_UV - FA_8_3_noUV	Huh7	limma	0.289475061	0.566448642	FALSE	no hit	6.00565
STAT1	J3KPM9|P42224|P42224-2	Signal transducer and activator of transcription OS=Homo sapiens GN=STAT1 PE=1 SV=1|Signal transducer and activator of transcription 1-alpha/beta OS=Homo sapiens GN=STAT1 PE=1 SV=2|Isoform Beta of Signal transducer and activator of transcription 1-alpha/beta OS=Homo sapiens GN=STAT1	1	1	NA	1	NA	8	8	NA	2	2	NA	3	3	NA	5.68761	5.68761	NA	TRUE	FALSE	TRUE	-0.235957053	22.62535162	-1.114903218	0.28954907	0.566448642	-5.649400459	0.585777802	1	1	FA_8_3_UV - FA_8_3_noUV	Huh7	limma	0.28954907	0.566448642	FALSE	no hit	5.68761
UBE2N	P61088	Ubiquitin-conjugating enzyme E2 N OS=Homo sapiens GN=UBE2N PE=1 SV=1	1	1	NA	1	NA	8	8	NA	2	2	NA	2	2	NA	6.62138	6.62138	NA	TRUE	FALSE	TRUE	-0.195693435	23.35396739	-1.114588423	0.289678042	0.566448642	-5.649730722	0.585883637	1	1	FA_8_3_UV - FA_8_3_noUV	Huh7	limma	0.289678042	0.566448642	FALSE	no hit	6.62138
BCAT2	B3KSI3|M0QXF9|M0QZ10|M0QZP4|M0R2K7|O15382|O15382-2	Branched-chain-amino-acid aminotransferase (Fragment) OS=Homo sapiens GN=BCAT2 PE=1 SV=1|Branched-chain-amino-acid aminotransferase OS=Homo sapiens GN=BCAT2 PE=1 SV=1|Branched-chain-amino-acid aminotransferase, mitochondrial (Fragment) OS=Homo sapiens GN=BCAT2 PE=1 SV=7|Branched-chain-amino-acid aminotransferase, mitochondrial OS=Homo sapiens GN=BCAT2 PE=1 SV=2|Isoform B of Branched-chain-amino-a…	2	1	1	1	1	8	8	8	2	2	2	3	2	3	6.07115	6.269	5.8733	TRUE	TRUE	TRUE	0.19023348	23.08333855	1.113808855	0.289997622	0.566448642	-5.650548282	0.586145767	1	1	FA_8_3_UV - FA_8_3_noUV	Huh7	limma	0.289997622	0.566448642	FALSE	no hit	6.269
KPNA1	P52294	Importin subunit alpha-5 OS=Homo sapiens GN=KPNA1 PE=1 SV=3	1	1	NA	1	NA	8	8	NA	2	2	NA	2	2	NA	6.47293	6.47293	NA	TRUE	FALSE	TRUE	-0.105843817	23.97954735	-1.110453397	0.291376282	0.567490592	-5.654062158	0.587274662	1	1	FA_8_3_UV - FA_8_3_noUV	Huh7	limma	0.291376282	0.567490592	FALSE	no hit	6.47293
EFL1	Q7Z2Z2|Q7Z2Z2-2	Elongation factor-like GTPase 1 OS=Homo sapiens GN=EFL1 PE=1 SV=2|Isoform 2 of Elongation factor-like GTPase 1 OS=Homo sapiens GN=EFL1	1	1	NA	1	NA	8	8	NA	2	2	NA	2	2	NA	6.03726	6.03726	NA	TRUE	FALSE	TRUE	-0.221360677	22.94856593	-1.110064597	0.291536354	0.567490592	-5.654468777	0.587405533	1	1	FA_8_3_UV - FA_8_3_noUV	Huh7	limma	0.291536354	0.567490592	FALSE	no hit	6.03726
WDR1	O75083	WD repeat-containing protein 1 OS=Homo sapiens GN=WDR1 PE=1 SV=4	2	1	1	1	1	8	8	8	2	2	2	11	11	9	7.20416	7.40739	7.00093	TRUE	TRUE	TRUE	-0.173354854	26.4694716	-1.10703732	0.292785031	0.568940274	-5.657630982	0.588424984	1	1	FA_8_3_UV - FA_8_3_noUV	Huh7	limma	0.292785031	0.568940274	FALSE	no hit	7.40739
RIF1	Q5UIP0|Q5UIP0-2	Telomere-associated protein RIF1 OS=Homo sapiens GN=RIF1 PE=1 SV=2|Isoform 2 of Telomere-associated protein RIF1 OS=Homo sapiens GN=RIF1	1	1	NA	1	NA	8	8	NA	2	2	NA	4	4	NA	6.20251	6.20251	NA	TRUE	FALSE	TRUE	0.277406868	23.7765935	1.104280126	0.293925882	0.569505773	-5.660505169	0.589354194	1	1	FA_8_3_UV - FA_8_3_noUV	Huh7	limma	0.293925882	0.569505773	FALSE	no hit	6.20251
DPYSL2	Q16555|Q16555-2	Dihydropyrimidinase-related protein 2 OS=Homo sapiens GN=DPYSL2 PE=1 SV=1|Isoform 2 of Dihydropyrimidinase-related protein 2 OS=Homo sapiens GN=DPYSL2	2	1	1	1	1	8	8	8	2	2	2	4	2	4	6.157295	6.32802	5.98657	TRUE	TRUE	TRUE	-0.223057366	23.12846694	-1.103896438	0.294084912	0.569505773	-5.660904692	0.589483555	1	1	FA_8_3_UV - FA_8_3_noUV	Huh7	limma	0.294084912	0.569505773	FALSE	no hit	6.32802
GPS1	C9JFE4|Q13098|Q13098-5|Q13098-7	COP9 signalosome complex subunit 1 OS=Homo sapiens GN=GPS1 PE=1 SV=2|COP9 signalosome complex subunit 1 OS=Homo sapiens GN=GPS1 PE=1 SV=4|Isoform 4 of COP9 signalosome complex subunit 1 OS=Homo sapiens GN=GPS1|Isoform 2 of COP9 signalosome complex subunit 1 OS=Homo sapiens GN=GPS1	1	1	NA	1	NA	8	8	NA	2	2	NA	5	5	NA	6.748	6.748	NA	TRUE	FALSE	TRUE	-0.138812114	24.61272857	-1.100598001	0.295454769	0.571178826	-5.664334751	0.590596171	1	1	FA_8_3_UV - FA_8_3_noUV	Huh7	limma	0.295454769	0.571178826	FALSE	no hit	6.748
CLPX	O76031	ATP-dependent Clp protease ATP-binding subunit clpX-like, mitochondrial OS=Homo sapiens GN=CLPX PE=1 SV=2	1	1	NA	1	NA	8	8	NA	2	2	NA	2	2	NA	5.90336	5.90336	NA	TRUE	FALSE	TRUE	0.204026117	22.8553466	1.092947956	0.298650713	0.574695563	-5.672258944	0.593180369	1	1	FA_8_3_UV - FA_8_3_noUV	Huh7	limma	0.298650713	0.574695563	FALSE	no hit	5.90336
ZFR	Q96KR1	Zinc finger RNA-binding protein OS=Homo sapiens GN=ZFR PE=1 SV=2	1	1	NA	1	NA	8	8	NA	2	2	NA	6	6	NA	6.66287	6.66287	NA	TRUE	FALSE	TRUE	0.114805319	24.92568818	1.092653335	0.298774323	0.574695563	-5.672563252	0.593279996	1	1	FA_8_3_UV - FA_8_3_noUV	Huh7	limma	0.298774323	0.574695563	FALSE	no hit	6.66287
NUP155	E9PF10|O75694|O75694-2	Nuclear pore complex protein Nup155 OS=Homo sapiens GN=NUP155 PE=1 SV=1|Nuclear pore complex protein Nup155 OS=Homo sapiens GN=NUP155 PE=1 SV=1|Isoform 2 of Nuclear pore complex protein Nup155 OS=Homo sapiens GN=NUP155	1	1	NA	1	NA	8	8	NA	2	2	NA	8	8	NA	6.75828	6.75828	NA	TRUE	FALSE	TRUE	0.156490753	25.38385367	1.092086075	0.299012432	0.574695563	-5.673148979	0.593471838	1	1	FA_8_3_UV - FA_8_3_noUV	Huh7	limma	0.299012432	0.574695563	FALSE	no hit	6.75828
EEF2	P13639	Elongation factor 2 OS=Homo sapiens GN=EEF2 PE=1 SV=4	2	1	1	1	1	8	8	8	2	2	2	21	21	21	7.737495	8.11522	7.35977	TRUE	TRUE	TRUE	-0.317899617	27.06923048	-1.090354905	0.299739991	0.574695563	-5.674935023	0.594057479	1	1	FA_8_3_UV - FA_8_3_noUV	Huh7	limma	0.299739991	0.574695563	FALSE	no hit	8.11522
PFN2	C9J0J7|G5E9Q6|P35080-2	Profilin OS=Homo sapiens GN=PFN2 PE=1 SV=1|Profilin OS=Homo sapiens GN=PFN2 PE=1 SV=1|Isoform IIb of Profilin-2 OS=Homo sapiens GN=PFN2	1	1	NA	1	NA	8	8	NA	2	2	NA	2	2	NA	6.62711	6.62711	NA	TRUE	FALSE	TRUE	-0.215437546	23.33224068	-1.090167028	0.299819032	0.574695563	-5.67512872	0.594121052	1	1	FA_8_3_UV - FA_8_3_noUV	Huh7	limma	0.299819032	0.574695563	FALSE	no hit	6.62711
VBP1	B4DWR3|P61758	Prefoldin subunit 3 OS=Homo sapiens GN=VBP1 PE=1 SV=1|Prefoldin subunit 3 OS=Homo sapiens GN=VBP1 PE=1 SV=3	1	1	NA	1	NA	8	8	NA	2	2	NA	3	3	NA	6.51979	6.51979	NA	TRUE	FALSE	TRUE	-0.232250404	23.09899978	-1.080152694	0.304055178	0.58182762	-5.685415043	0.597514165	1	1	FA_8_3_UV - FA_8_3_noUV	Huh7	limma	0.304055178	0.58182762	FALSE	no hit	6.51979
DNAJA2	O60884	DnaJ homolog subfamily A member 2 OS=Homo sapiens GN=DNAJA2 PE=1 SV=1	1	1	NA	1	NA	8	8	NA	2	2	NA	3	3	NA	6.10685	6.10685	NA	TRUE	FALSE	TRUE	-0.152314713	23.53562904	-1.077289694	0.305274592	0.582452478	-5.688341959	0.598485839	1	1	FA_8_3_UV - FA_8_3_noUV	Huh7	limma	0.305274592	0.582452478	FALSE	no hit	6.10685
ILF3	Q12906|Q12906-2|Q12906-3|Q12906-4|Q12906-5|Q12906-6|Q12906-7	Interleukin enhancer-binding factor 3 OS=Homo sapiens GN=ILF3 PE=1 SV=3|Isoform 2 of Interleukin enhancer-binding factor 3 OS=Homo sapiens GN=ILF3|Isoform 3 of Interleukin enhancer-binding factor 3 OS=Homo sapiens GN=ILF3|Isoform 4 of Interleukin enhancer-binding factor 3 OS=Homo sapiens GN=ILF3|Isoform 5 of Interleukin enhancer-binding factor 3 OS=Homo sapiens GN=ILF3|Isoform 6 of Interleukin en…	2	1	1	1	1	8	8	8	2	2	2	18	9	18	7.440325	7.61978	7.26087	TRUE	TRUE	TRUE	0.164811378	25.82822834	1.075386143	0.306087411	0.582452478	-5.690284588	0.599132282	1	1	FA_8_3_UV - FA_8_3_noUV	Huh7	limma	0.306087411	0.582452478	FALSE	no hit	7.61978
CTSA	P10619|P10619-2|X6R5C5|X6R8A1	Lysosomal protective protein OS=Homo sapiens GN=CTSA PE=1 SV=2|Isoform 2 of Lysosomal protective protein OS=Homo sapiens GN=CTSA|Carboxypeptidase OS=Homo sapiens GN=CTSA PE=1 SV=1|Carboxypeptidase OS=Homo sapiens GN=CTSA PE=1 SV=1	2	1	1	1	1	8	8	8	2	2	2	3	3	3	6.66458	7.06078	6.26838	TRUE	TRUE	TRUE	0.135623906	24.61293272	1.075040883	0.306235014	0.582452478	-5.690636644	0.599249566	1	1	FA_8_3_UV - FA_8_3_noUV	Huh7	limma	0.306235014	0.582452478	FALSE	no hit	7.06078
PRMT1	E9PIX6|E9PKG1|E9PQ98|H7C2I1|Q99873|Q99873-2|Q99873-3|Q99873-4	Isoform 2 of Protein arginine N-methyltransferase 1 OS=Homo sapiens GN=PRMT1|Isoform 3 of Protein arginine N-methyltransferase 1 OS=Homo sapiens GN=PRMT1|Isoform 4 of Protein arginine N-methyltransferase 1 OS=Homo sapiens GN=PRMT1|Protein arginine N-methyltransferase 1 (Fragment) OS=Homo sapiens GN=PRMT1 PE=1 SV=1|Protein arginine N-methyltransferase 1 (Fragment) OS=Homo sapiens GN=PRMT1 PE=1 SV=…	2	1	1	1	1	8	8	8	2	2	2	7	7	2	6.553505	7.14315	5.96386	TRUE	TRUE	TRUE	-0.104549354	25.65285906	-1.07454916	0.306445325	0.582452478	-5.691137889	0.59941662	1	1	FA_8_3_UV - FA_8_3_noUV	Huh7	limma	0.306445325	0.582452478	FALSE	no hit	7.14315
NUP93	H3BVG0|Q8N1F7	Nuclear pore complex protein Nup93 OS=Homo sapiens GN=NUP93 PE=1 SV=1|Nuclear pore complex protein Nup93 OS=Homo sapiens GN=NUP93 PE=1 SV=2	1	1	NA	1	NA	8	8	NA	2	2	NA	13	13	NA	7.00825	7.00825	NA	TRUE	FALSE	TRUE	0.165943967	25.98645597	1.069528007	0.308599162	0.583593298	-5.696245823	0.601123679	1	1	FA_8_3_UV - FA_8_3_noUV	Huh7	limma	0.308599162	0.583593298	FALSE	no hit	7.00825
THOP1	P52888	Thimet oligopeptidase OS=Homo sapiens GN=THOP1 PE=1 SV=2	1	1	NA	1	NA	8	8	NA	2	2	NA	6	6	NA	7.25155	7.25155	NA	TRUE	FALSE	TRUE	-0.264357373	25.13636765	-1.068942652	0.308850996	0.583593298	-5.696840054	0.601322827	1	1	FA_8_3_UV - FA_8_3_noUV	Huh7	limma	0.308850996	0.583593298	FALSE	no hit	7.25155
DST	Q03001	Dystonin OS=Homo sapiens GN=DST PE=1 SV=4	1	1	NA	1	NA	8	8	NA	2	2	NA	23	23	NA	6.93485	6.93485	NA	TRUE	FALSE	TRUE	0.175108877	26.71785517	1.068668109	0.308969166	0.583593298	-5.69711867	0.601416241	1	1	FA_8_3_UV - FA_8_3_noUV	Huh7	limma	0.308969166	0.583593298	FALSE	no hit	6.93485
DBN1	Q16643|Q16643-2|Q16643-3	Drebrin OS=Homo sapiens GN=DBN1 PE=1 SV=4|Isoform 2 of Drebrin OS=Homo sapiens GN=DBN1|Isoform 3 of Drebrin OS=Homo sapiens GN=DBN1	2	1	1	1	1	8	8	8	2	2	2	8	8	2	6.67747	7.05353	6.30141	TRUE	TRUE	TRUE	-0.155519697	25.37867417	-1.068333602	0.30911319	0.583593298	-5.697458062	0.601530067	1	1	FA_8_3_UV - FA_8_3_noUV	Huh7	limma	0.30911319	0.583593298	FALSE	no hit	7.05353
CUL4A	Q13619	Cullin-4A OS=Homo sapiens GN=CUL4A PE=1 SV=3	1	1	NA	1	NA	8	8	NA	2	2	NA	5	5	NA	6.58441	6.58441	NA	TRUE	FALSE	TRUE	0.134062828	23.85422226	1.064525198	0.310756522	0.584286927	-5.701316112	0.60282668	1	1	FA_8_3_UV - FA_8_3_noUV	Huh7	limma	0.310756522	0.584286927	FALSE	no hit	6.58441
MAT2A	P31153	S-adenosylmethionine synthase isoform type-2 OS=Homo sapiens GN=MAT2A PE=1 SV=1	2	1	1	1	1	8	8	8	2	2	2	6	6	3	6.264535	6.56937	5.9597	TRUE	TRUE	TRUE	-0.282138644	24.48100245	-1.064306731	0.310850991	0.584286927	-5.701537093	0.602901098	1	1	FA_8_3_UV - FA_8_3_noUV	Huh7	limma	0.310850991	0.584286927	FALSE	no hit	6.56937
DIABLO	A0A024RBT2|F5GXT8|F5H796|Q9NR28|Q9NR28-2|Q9NR28-3	Diablo homolog, mitochondrial OS=Homo sapiens GN=DIABLO PE=1 SV=1|Diablo homolog, mitochondrial (Fragment) OS=Homo sapiens GN=DIABLO PE=1 SV=1|Diablo homolog, mitochondrial (Fragment) OS=Homo sapiens GN=DIABLO PE=1 SV=7|Diablo homolog, mitochondrial OS=Homo sapiens GN=DIABLO PE=1 SV=1|Isoform 2 of Diablo homolog, mitochondrial OS=Homo sapiens GN=DIABLO|Isoform 3 of Diablo homolog, mitochondrial O…	1	1	NA	1	NA	8	8	NA	2	2	NA	2	2	NA	7.0413	7.0413	NA	TRUE	FALSE	TRUE	0.235284679	23.30022906	1.063885581	0.311033165	0.584286927	-5.701962987	0.603044568	1	1	FA_8_3_UV - FA_8_3_noUV	Huh7	limma	0.311033165	0.584286927	FALSE	no hit	7.0413
PLOD3	O60568	Procollagen-lysine,2-oxoglutarate 5-dioxygenase 3 OS=Homo sapiens GN=PLOD3 PE=1 SV=1	2	1	1	1	1	8	8	8	2	2	2	6	6	6	6.662885	7.18305	6.14272	TRUE	TRUE	TRUE	0.127712569	25.0753648	1.062502812	0.311631867	0.584439165	-5.703360385	0.603515735	1	1	FA_8_3_UV - FA_8_3_noUV	Huh7	limma	0.311631867	0.584439165	FALSE	no hit	7.18305
XRCC6	P12956	X-ray repair cross-complementing protein 6 OS=Homo sapiens GN=XRCC6 PE=1 SV=2	2	1	1	1	1	8	8	8	2	2	2	17	15	17	7.26982	7.43783	7.10181	TRUE	TRUE	TRUE	-0.122460427	26.09797586	-1.060197211	0.312632066	0.585015323	-5.705687143	0.604301716	1	1	FA_8_3_UV - FA_8_3_noUV	Huh7	limma	0.312632066	0.585015323	FALSE	no hit	7.43783
PREP	P48147	Prolyl endopeptidase OS=Homo sapiens GN=PREP PE=1 SV=2	2	1	1	1	1	8	8	8	2	2	2	19	5	19	6.883875	6.71016	7.05759	TRUE	TRUE	TRUE	-0.172453361	23.64181648	-1.058719656	0.313274322	0.585015323	-5.70717613	0.604805657	1	1	FA_8_3_UV - FA_8_3_noUV	Huh7	limma	0.313274322	0.585015323	FALSE	no hit	6.71016
SMARCA5	O60264	SWI/SNF-related matrix-associated actin-dependent regulator of chromatin subfamily A member 5 OS=Homo sapiens GN=SMARCA5 PE=1 SV=1	2	1	1	1	1	8	8	8	2	2	2	6	6	2	6.475555	6.84654	6.10457	TRUE	TRUE	TRUE	0.231460729	24.99994986	1.058215724	0.313493596	0.585015323	-5.70768358	0.604977573	1	1	FA_8_3_UV - FA_8_3_noUV	Huh7	limma	0.313493596	0.585015323	FALSE	no hit	6.84654
ACBD3	Q9H3P7	Golgi resident protein GCP60 OS=Homo sapiens GN=ACBD3 PE=1 SV=4	1	1	NA	1	NA	8	8	NA	2	2	NA	3	3	NA	6.22467	6.22467	NA	TRUE	FALSE	TRUE	-0.140820739	24.01219206	-1.052581488	0.315953087	0.587606672	-5.713343954	0.606901181	1	1	FA_8_3_UV - FA_8_3_noUV	Huh7	limma	0.315953087	0.587606672	FALSE	no hit	6.22467
SEC24C	G5EA31|P53992	Protein transport protein Sec24C OS=Homo sapiens GN=SEC24C PE=1 SV=1|Protein transport protein Sec24C OS=Homo sapiens GN=SEC24C PE=1 SV=3	1	1	NA	1	NA	8	8	NA	2	2	NA	3	3	NA	6.15695	6.15695	NA	TRUE	FALSE	TRUE	0.115653349	22.96899715	1.051698813	0.31633971	0.587606672	-5.714228526	0.607202787	1	1	FA_8_3_UV - FA_8_3_noUV	Huh7	limma	0.31633971	0.587606672	FALSE	no hit	6.15695
HSPE1	B8ZZL8|P61604	10 kDa heat shock protein, mitochondrial OS=Homo sapiens GN=HSPE1 PE=1 SV=1|10 kDa heat shock protein, mitochondrial OS=Homo sapiens GN=HSPE1 PE=1 SV=2	1	1	NA	1	NA	8	8	NA	2	2	NA	2	2	NA	6.82837	6.82837	NA	TRUE	FALSE	TRUE	0.182215857	24.12183501	1.051461703	0.316443628	0.587606672	-5.714466044	0.607283817	1	1	FA_8_3_UV - FA_8_3_noUV	Huh7	limma	0.316443628	0.587606672	FALSE	no hit	6.82837
ATP1A1	P05023|P05023-3|P05023-4	Sodium/potassium-transporting ATPase subunit alpha-1 OS=Homo sapiens GN=ATP1A1 PE=1 SV=1|Isoform 3 of Sodium/potassium-transporting ATPase subunit alpha-1 OS=Homo sapiens GN=ATP1A1|Isoform 4 of Sodium/potassium-transporting ATPase subunit alpha-1 OS=Homo sapiens GN=ATP1A1	1	1	NA	1	NA	8	8	NA	2	2	NA	5	5	NA	6.55257	6.55257	NA	TRUE	FALSE	TRUE	0.273927159	24.07159383	1.046232315	0.318742037	0.589187618	-5.719693474	0.609072147	1	1	FA_8_3_UV - FA_8_3_noUV	Huh7	limma	0.318742037	0.589187618	FALSE	no hit	6.55257
CUL5	Q93034	Cullin-5 OS=Homo sapiens GN=CUL5 PE=1 SV=4	1	1	NA	1	NA	8	8	NA	2	2	NA	2	2	NA	5.83595	5.83595	NA	TRUE	FALSE	TRUE	-0.163747194	22.82193016	-1.046217361	0.318748628	0.589187618	-5.719708393	0.609077265	1	1	FA_8_3_UV - FA_8_3_noUV	Huh7	limma	0.318748628	0.589187618	FALSE	no hit	5.83595
CDK5RAP3	Q96JB5|Q96JB5-4	CDK5 regulatory subunit-associated protein 3 OS=Homo sapiens GN=CDK5RAP3 PE=1 SV=2|Isoform 4 of CDK5 regulatory subunit-associated protein 3 OS=Homo sapiens GN=CDK5RAP3	1	1	NA	1	NA	8	8	NA	2	2	NA	4	4	NA	6.07284	6.07284	NA	TRUE	FALSE	TRUE	0.185088375	23.92559566	1.045963293	0.318860615	0.589187618	-5.719961828	0.60916421	1	1	FA_8_3_UV - FA_8_3_noUV	Huh7	limma	0.318860615	0.589187618	FALSE	no hit	6.07284
GDI1	P31150	Rab GDP dissociation inhibitor alpha OS=Homo sapiens GN=GDI1 PE=1 SV=2	2	1	1	1	1	8	8	8	2	2	2	2	2	2	6.261955	6.79326	5.73065	TRUE	TRUE	TRUE	-0.297169709	24.07484405	-1.042137178	0.320550654	0.591342627	-5.723772419	0.610474223	1	1	FA_8_3_UV - FA_8_3_noUV	Huh7	limma	0.320550654	0.591342627	FALSE	no hit	6.79326
AKR1B1	P15121	Aldose reductase OS=Homo sapiens GN=AKR1B1 PE=1 SV=3	2	1	1	1	1	8	8	8	2	2	2	15	15	5	7.34138	8.34951	6.33325	TRUE	TRUE	TRUE	-0.406745929	26.83222909	-1.040907846	0.321095086	0.591380673	-5.724994372	0.610895396	1	1	FA_8_3_UV - FA_8_3_noUV	Huh7	limma	0.321095086	0.591380673	FALSE	no hit	8.34951
RPS3A	P61247	40S ribosomal protein S3a OS=Homo sapiens GN=RPS3A PE=1 SV=2	2	1	1	1	1	8	8	8	2	2	2	5	5	4	6.545125	6.91934	6.17091	TRUE	TRUE	TRUE	-0.145224213	24.88124908	-1.039493046	0.321722513	0.5915712	-5.726399237	0.61138027	1	1	FA_8_3_UV - FA_8_3_noUV	Huh7	limma	0.321722513	0.5915712	FALSE	no hit	6.91934
BZW1	Q7L1Q6|Q7L1Q6-3|Q7L1Q6-4	Basic leucine zipper and W2 domain-containing protein 1 OS=Homo sapiens GN=BZW1 PE=1 SV=1|Isoform 3 of Basic leucine zipper and W2 domain-containing protein 1 OS=Homo sapiens GN=BZW1|Isoform 4 of Basic leucine zipper and W2 domain-containing protein 1 OS=Homo sapiens GN=BZW1	1	1	NA	1	NA	8	8	NA	2	2	NA	4	4	NA	6.39512	6.39512	NA	TRUE	FALSE	TRUE	-0.146942932	24.37007834	-1.033763034	0.324273005	0.595291419	-5.732073218	0.613345776	1	1	FA_8_3_UV - FA_8_3_noUV	Huh7	limma	0.324273005	0.595291419	FALSE	no hit	6.39512
DCTN2	Q13561|Q13561-2|Q13561-3	Dynactin subunit 2 OS=Homo sapiens GN=DCTN2 PE=1 SV=4|Isoform 2 of Dynactin subunit 2 OS=Homo sapiens GN=DCTN2|Isoform 3 of Dynactin subunit 2 OS=Homo sapiens GN=DCTN2	1	1	NA	1	NA	8	8	NA	2	2	NA	2	2	NA	6.58878	6.58878	NA	TRUE	FALSE	TRUE	-0.142733011	23.54712173	-1.032533622	0.324822192	0.595331583	-5.733287302	0.613767852	1	1	FA_8_3_UV - FA_8_3_noUV	Huh7	limma	0.324822192	0.595331583	FALSE	no hit	6.58878
ANXA4	B4E1S2|P09525|Q6P452	Annexin A4 OS=Homo sapiens GN=ANXA4 PE=1 SV=4|Annexin OS=Homo sapiens GN=ANXA4 PE=1 SV=1	2	1	1	1	1	8	8	8	2	2	2	8	2	8	6.77669	6.78741	6.76597	TRUE	TRUE	TRUE	-0.575671876	24.23960885	-1.028469332	0.326642677	0.597038004	-5.73729258	0.615164094	1	1	FA_8_3_UV - FA_8_3_noUV	Huh7	limma	0.326642677	0.597038004	FALSE	no hit	6.78741
NUCB1	Q02818	Nucleobindin-1 OS=Homo sapiens GN=NUCB1 PE=1 SV=4	2	1	1	1	1	8	8	8	2	2	2	12	5	12	6.96583	6.9883	6.94336	TRUE	TRUE	TRUE	0.16435538	24.65853579	1.02809466	0.326810882	0.597038004	-5.737661167	0.615292879	1	1	FA_8_3_UV - FA_8_3_noUV	Huh7	limma	0.326810882	0.597038004	FALSE	no hit	6.9883
PGM2	Q96G03	Phosphoglucomutase-2 OS=Homo sapiens GN=PGM2 PE=1 SV=4	2	1	1	1	1	8	8	8	2	2	2	5	5	5	6.55059	6.75928	6.3419	TRUE	TRUE	TRUE	-0.230493569	24.46165096	-1.02690376	0.327345955	0.597049407	-5.738832002	0.615702301	1	1	FA_8_3_UV - FA_8_3_noUV	Huh7	limma	0.327345955	0.597049407	FALSE	no hit	6.75928
CLTC	A0A087WVQ6|Q00610|Q00610-2	Clathrin heavy chain OS=Homo sapiens GN=CLTC PE=1 SV=1|Clathrin heavy chain 1 OS=Homo sapiens GN=CLTC PE=1 SV=5|Isoform 2 of Clathrin heavy chain 1 OS=Homo sapiens GN=CLTC	2	1	1	1	1	8	8	8	2	2	2	36	36	14	7.28544	7.88447	6.68641	TRUE	TRUE	TRUE	0.178432467	27.88192871	1.024047401	0.328631976	0.598428227	-5.741635742	0.616684784	1	1	FA_8_3_UV - FA_8_3_noUV	Huh7	limma	0.328631976	0.598428227	FALSE	no hit	7.88447
PPL	K7EKI8|O60437	Periplakin OS=Homo sapiens GN=PPL PE=1 SV=1|Periplakin OS=Homo sapiens GN=PPL PE=1 SV=4	1	1	NA	1	NA	8	8	NA	2	2	NA	3	3	NA	6.1568	6.1568	NA	TRUE	FALSE	TRUE	0.155614533	23.41096923	1.017562297	0.3315657	0.601393123	-5.747977786	0.61891797	1	1	FA_8_3_UV - FA_8_3_noUV	Huh7	limma	0.3315657	0.601393123	FALSE	no hit	6.1568
S100A6	P06703|R4GN98	Protein S100-A6 OS=Homo sapiens GN=S100A6 PE=1 SV=1|Protein S100 (Fragment) OS=Homo sapiens GN=S100A6 PE=1 SV=1	2	1	1	1	1	8	8	8	2	2	2	3	2	3	7.77986	7.917	7.64272	TRUE	TRUE	TRUE	-0.384031069	23.50242954	-1.017032317	0.331806307	0.601393123	-5.748494625	0.619100627	1	1	FA_8_3_UV - FA_8_3_noUV	Huh7	limma	0.331806307	0.601393123	FALSE	no hit	7.917
INTS1	Q8N201	Integrator complex subunit 1 OS=Homo sapiens GN=INTS1 PE=1 SV=2	1	1	NA	1	NA	8	8	NA	2	2	NA	2	2	NA	5.65879	5.65879	NA	TRUE	FALSE	TRUE	0.353580927	21.94200578	1.016918036	0.331858207	0.601393123	-5.748606044	0.619140018	1	1	FA_8_3_UV - FA_8_3_noUV	Huh7	limma	0.331858207	0.601393123	FALSE	no hit	5.65879
PGAM5	Q96HS1|Q96HS1-2	Serine/threonine-protein phosphatase PGAM5, mitochondrial OS=Homo sapiens GN=PGAM5 PE=1 SV=2|Isoform 2 of Serine/threonine-protein phosphatase PGAM5, mitochondrial OS=Homo sapiens GN=PGAM5	1	1	NA	1	NA	8	8	NA	2	2	NA	2	2	NA	6.86208	6.86208	NA	TRUE	FALSE	TRUE	0.25777298	23.17085302	1.014399636	0.333003444	0.602501424	-5.751058769	0.620008331	1	1	FA_8_3_UV - FA_8_3_noUV	Huh7	limma	0.333003444	0.602501424	FALSE	no hit	6.86208
UBR4	Q5T4S7|Q5T4S7-2|Q5T4S7-3|Q5T4S7-4	E3 ubiquitin-protein ligase UBR4 OS=Homo sapiens GN=UBR4 PE=1 SV=1|Isoform 2 of E3 ubiquitin-protein ligase UBR4 OS=Homo sapiens GN=UBR4|Isoform 3 of E3 ubiquitin-protein ligase UBR4 OS=Homo sapiens GN=UBR4|Isoform 4 of E3 ubiquitin-protein ligase UBR4 OS=Homo sapiens GN=UBR4	1	1	NA	1	NA	8	8	NA	2	2	NA	4	4	NA	6.26443	6.26443	NA	TRUE	FALSE	TRUE	-0.132486594	23.81804504	-1.012978531	0.333650978	0.602651746	-5.752440624	0.620498544	1	1	FA_8_3_UV - FA_8_3_noUV	Huh7	limma	0.333650978	0.602651746	FALSE	no hit	6.26443
EIF3I	Q13347	Eukaryotic translation initiation factor 3 subunit I OS=Homo sapiens GN=EIF3I PE=1 SV=1	1	1	NA	1	NA	8	8	NA	2	2	NA	6	6	NA	7.35723	7.35723	NA	TRUE	FALSE	TRUE	-0.134481129	25.21744746	-1.011306472	0.334414052	0.602651746	-5.754064476	0.621075541	1	1	FA_8_3_UV - FA_8_3_noUV	Huh7	limma	0.334414052	0.602651746	FALSE	no hit	7.35723
IPO9	Q96P70	Importin-9 OS=Homo sapiens GN=IPO9 PE=1 SV=3	1	1	NA	1	NA	8	8	NA	2	2	NA	9	9	NA	6.84874	6.84874	NA	TRUE	FALSE	TRUE	-0.113357801	25.43866451	-1.01038631	0.334834535	0.602651746	-5.754957174	0.621393171	1	1	FA_8_3_UV - FA_8_3_noUV	Huh7	limma	0.334834535	0.602651746	FALSE	no hit	6.84874
LARP1	Q6PKG0|Q6PKG0-3	La-related protein 1 OS=Homo sapiens GN=LARP1 PE=1 SV=2|Isoform 2 of La-related protein 1 OS=Homo sapiens GN=LARP1	1	1	NA	1	NA	8	8	NA	2	2	NA	2	2	NA	6.39463	6.39463	NA	TRUE	FALSE	TRUE	-0.152173564	23.11490862	-1.008872636	0.335527081	0.602651746	-5.756424224	0.621915829	1	1	FA_8_3_UV - FA_8_3_noUV	Huh7	limma	0.335527081	0.602651746	FALSE	no hit	6.39463
UBA6	A0AVT1|A0AVT1-2	Isoform 2 of Ubiquitin-like modifier-activating enzyme 6 OS=Homo sapiens GN=UBA6|Ubiquitin-like modifier-activating enzyme 6 OS=Homo sapiens GN=UBA6 PE=1 SV=1	2	1	1	1	1	8	8	8	2	2	2	6	6	4	6.34904	6.58794	6.11014	TRUE	TRUE	TRUE	-0.172030581	24.86656139	-1.007554754	0.336130908	0.602651746	-5.757700047	0.622371037	1	1	FA_8_3_UV - FA_8_3_noUV	Huh7	limma	0.336130908	0.602651746	FALSE	no hit	6.58794
RPL3	B5MCW2|G5E9G0|P39023	60S ribosomal protein L3 (Fragment) OS=Homo sapiens GN=RPL3 PE=1 SV=1|60S ribosomal protein L3 OS=Homo sapiens GN=RPL3 PE=1 SV=1|60S ribosomal protein L3 OS=Homo sapiens GN=RPL3 PE=1 SV=2	2	1	1	1	1	8	8	8	2	2	2	3	3	3	6.75218	6.89346	6.6109	TRUE	TRUE	TRUE	-0.147362762	24.48897856	-1.006785266	0.336483842	0.602651746	-5.758444347	0.622636892	1	1	FA_8_3_UV - FA_8_3_noUV	Huh7	limma	0.336483842	0.602651746	FALSE	no hit	6.89346
APLP2	Q06481|Q06481-2|Q06481-3|Q06481-4|Q06481-5|Q06481-6	Amyloid-like protein 2 OS=Homo sapiens GN=APLP2 PE=1 SV=2|Isoform 2 of Amyloid-like protein 2 OS=Homo sapiens GN=APLP2|Isoform 3 of Amyloid-like protein 2 OS=Homo sapiens GN=APLP2|Isoform 4 of Amyloid-like protein 2 OS=Homo sapiens GN=APLP2|Isoform 5 of Amyloid-like protein 2 OS=Homo sapiens GN=APLP2|Isoform 6 of Amyloid-like protein 2 OS=Homo sapiens GN=APLP2	1	1	NA	1	NA	8	8	NA	2	2	NA	3	3	NA	6.50268	6.50268	NA	TRUE	FALSE	TRUE	-0.153501385	24.5463378	-1.004343385	0.337605647	0.602651746	-5.760803213	0.623480877	1	1	FA_8_3_UV - FA_8_3_noUV	Huh7	limma	0.337605647	0.602651746	FALSE	no hit	6.50268
LSM8	F2Z2Y6|O95777	U6 snRNA-associated Sm-like protein LSm8 OS=Homo sapiens GN=LSM8 PE=1 SV=1|U6 snRNA-associated Sm-like protein LSm8 OS=Homo sapiens GN=LSM8 PE=1 SV=3	2	1	1	1	1	8	8	8	2	2	2	3	2	3	6.42415	6.40444	6.44386	TRUE	TRUE	TRUE	0.136924743	22.3666213	1.003976802	0.337774294	0.602651746	-5.761156928	0.623607622	1	1	FA_8_3_UV - FA_8_3_noUV	Huh7	limma	0.337774294	0.602651746	FALSE	no hit	6.40444
ANXA2	P07355|P07355-2	Annexin A2 OS=Homo sapiens GN=ANXA2 PE=1 SV=2|Isoform 2 of Annexin A2 OS=Homo sapiens GN=ANXA2	2	1	1	1	1	8	8	8	2	2	2	16	16	15	7.78488	8.02322	7.54654	TRUE	TRUE	TRUE	0.170722759	27.2126076	1.002666724	0.338377503	0.602651746	-5.762420154	0.624060666	1	1	FA_8_3_UV - FA_8_3_noUV	Huh7	limma	0.338377503	0.602651746	FALSE	no hit	8.02322
U2SURP	E7ET15|O15042|O15042-2	Isoform 2 of U2 snRNP-associated SURP motif-containing protein OS=Homo sapiens GN=U2SURP|U2 snRNP-associated SURP motif-containing protein OS=Homo sapiens GN=U2SURP PE=1 SV=1|U2 snRNP-associated SURP motif-containing protein OS=Homo sapiens GN=U2SURP PE=1 SV=2	2	1	1	1	1	8	8	8	2	2	2	5	5	2	6.399305	6.63205	6.16656	TRUE	TRUE	TRUE	0.178951557	24.14545676	1.002564828	0.338424453	0.602651746	-5.76251835	0.624095909	1	1	FA_8_3_UV - FA_8_3_noUV	Huh7	limma	0.338424453	0.602651746	FALSE	no hit	6.63205
IGF2BP3	F8WD15|O00425	Insulin-like growth factor 2 mRNA-binding protein 3 OS=Homo sapiens GN=IGF2BP3 PE=1 SV=1|Insulin-like growth factor 2 mRNA-binding protein 3 OS=Homo sapiens GN=IGF2BP3 PE=1 SV=2	1	1	NA	1	NA	8	8	NA	2	2	NA	2	2	NA	6.40884	6.40884	NA	TRUE	FALSE	TRUE	-0.154470271	22.22268326	-0.998309995	0.340389204	0.604927124	-5.766611342	0.625568311	1	1	FA_8_3_UV - FA_8_3_noUV	Huh7	limma	0.340389204	0.604927124	FALSE	no hit	6.40884
MYH10	P35580|P35580-2|P35580-3|P35580-4|P35580-5	Myosin-10 OS=Homo sapiens GN=MYH10 PE=1 SV=3|Isoform 2 of Myosin-10 OS=Homo sapiens GN=MYH10|Isoform 3 of Myosin-10 OS=Homo sapiens GN=MYH10|Isoform 4 of Myosin-10 OS=Homo sapiens GN=MYH10|Isoform 5 of Myosin-10 OS=Homo sapiens GN=MYH10	1	1	NA	1	NA	8	8	NA	2	2	NA	11	11	NA	6.59052	6.59052	NA	TRUE	FALSE	TRUE	-0.203895173	25.69708666	-0.997271059	0.340870224	0.604927124	-5.76760859	0.625928067	1	1	FA_8_3_UV - FA_8_3_noUV	Huh7	limma	0.340870224	0.604927124	FALSE	no hit	6.59052
CAPZB	B1AK87|B1AK88|P47756-2	Capping protein (Actin filament) muscle Z-line, beta, isoform CRA_a OS=Homo sapiens GN=CAPZB PE=1 SV=1|Capping protein (Actin filament) muscle Z-line, beta, isoform CRA_d OS=Homo sapiens GN=CAPZB PE=1 SV=1|Isoform 2 of F-actin-capping protein subunit beta OS=Homo sapiens GN=CAPZB	2	1	1	1	1	8	8	8	2	2	2	8	8	8	7.394405	7.52273	7.26608	TRUE	TRUE	TRUE	-0.108065793	25.88773576	-0.996322931	0.341309635	0.604927124	-5.768517928	0.626256455	1	1	FA_8_3_UV - FA_8_3_noUV	Huh7	limma	0.341309635	0.604927124	FALSE	no hit	7.52273
COPS6	E7EM64|Q7L5N1	COP9 signalosome complex subunit 6 OS=Homo sapiens GN=COPS6 PE=1 SV=1|COP9 signalosome complex subunit 6 OS=Homo sapiens GN=COPS6 PE=1 SV=1	1	1	NA	1	NA	8	8	NA	2	2	NA	3	3	NA	6.69011	6.69011	NA	TRUE	FALSE	TRUE	-0.134229737	23.55826282	-0.99419228	0.342298605	0.605506331	-5.770558814	0.626994686	1	1	FA_8_3_UV - FA_8_3_noUV	Huh7	limma	0.342298605	0.605506331	FALSE	no hit	6.69011
MYO1B	E9PDF6|O43795|O43795-2	Unconventional myosin-Ib OS=Homo sapiens GN=MYO1B PE=1 SV=1|Unconventional myosin-Ib OS=Homo sapiens GN=MYO1B PE=1 SV=3|Isoform 2 of Unconventional myosin-Ib OS=Homo sapiens GN=MYO1B	1	1	NA	1	NA	8	8	NA	2	2	NA	11	11	NA	6.91278	6.91278	NA	TRUE	FALSE	TRUE	0.197219348	26.20728598	0.993309283	0.342709075	0.605506331	-5.771403556	0.627300738	1	1	FA_8_3_UV - FA_8_3_noUV	Huh7	limma	0.342709075	0.605506331	FALSE	no hit	6.91278
MCM7	P33993	DNA replication licensing factor MCM7 OS=Homo sapiens GN=MCM7 PE=1 SV=4	1	1	NA	1	NA	8	8	NA	2	2	NA	5	5	NA	6.3552	6.3552	NA	TRUE	FALSE	TRUE	-0.237019102	24.49330336	-0.991893064	0.343368171	0.605722915	-5.77275713	0.627791742	1	1	FA_8_3_UV - FA_8_3_noUV	Huh7	limma	0.343368171	0.605722915	FALSE	no hit	6.3552
AAMP	C9JEH3|C9JG97|Q13685	Angio-associated migratory cell protein OS=Homo sapiens GN=AAMP PE=1 SV=1|Angio-associated migratory cell protein OS=Homo sapiens GN=AAMP PE=1 SV=1|Angio-associated migratory cell protein OS=Homo sapiens GN=AAMP PE=1 SV=2	1	1	NA	1	NA	8	8	NA	2	2	NA	2	2	NA	6.45424	6.45424	NA	TRUE	FALSE	TRUE	-0.304690534	22.89473562	-0.988381985	0.3450062	0.607663026	-5.776106036	0.629009744	1	1	FA_8_3_UV - FA_8_3_noUV	Huh7	limma	0.3450062	0.607663026	FALSE	no hit	6.45424
EIF6	P56537	Eukaryotic translation initiation factor 6 OS=Homo sapiens GN=EIF6 PE=1 SV=1	2	1	1	1	1	8	8	8	2	2	2	4	4	3	6.50339	7.00422	6.00256	TRUE	TRUE	TRUE	-0.14861547	23.88413592	-0.983695765	0.347201359	0.608747441	-5.780560538	0.63063698	1	1	FA_8_3_UV - FA_8_3_noUV	Huh7	limma	0.347201359	0.608747441	FALSE	no hit	7.00422
PRDX2	P32119	Peroxiredoxin-2 OS=Homo sapiens GN=PRDX2 PE=1 SV=5	2	1	1	1	1	8	8	8	2	2	2	5	3	5	6.962505	6.9235	7.00151	TRUE	TRUE	TRUE	-0.30601394	24.66221049	-0.983693904	0.347202232	0.608747441	-5.780562303	0.630637626	1	1	FA_8_3_UV - FA_8_3_noUV	Huh7	limma	0.347202232	0.608747441	FALSE	no hit	6.9235
PTER	Q96BW5|Q96BW5-2	Phosphotriesterase-related protein OS=Homo sapiens GN=PTER PE=1 SV=1|Isoform 2 of Phosphotriesterase-related protein OS=Homo sapiens GN=PTER	1	1	NA	1	NA	8	8	NA	2	2	NA	2	2	NA	6.4583	6.4583	NA	TRUE	FALSE	TRUE	-0.19577308	23.31268176	-0.982898833	0.347575676	0.608747441	-5.781316325	0.630913883	1	1	FA_8_3_UV - FA_8_3_noUV	Huh7	limma	0.347575676	0.608747441	FALSE	no hit	6.4583
GRB2	J3KT38|P62993	Growth factor receptor-bound protein 2 (Fragment) OS=Homo sapiens GN=GRB2 PE=1 SV=7|Growth factor receptor-bound protein 2 OS=Homo sapiens GN=GRB2 PE=1 SV=1	2	1	1	1	1	8	8	8	2	2	2	3	3	2	6.309205	6.65604	5.96237	TRUE	TRUE	TRUE	-0.199741295	24.383088	-0.982466951	0.347778653	0.608747441	-5.781725698	0.631063968	1	1	FA_8_3_UV - FA_8_3_noUV	Huh7	limma	0.347778653	0.608747441	FALSE	no hit	6.65604
PSPC1	Q8WXF1|Q8WXF1-2	Paraspeckle component 1 OS=Homo sapiens GN=PSPC1 PE=1 SV=1|Isoform 2 of Paraspeckle component 1 OS=Homo sapiens GN=PSPC1	1	1	NA	1	NA	8	8	NA	2	2	NA	3	3	NA	6.65736	6.65736	NA	TRUE	FALSE	TRUE	0.09364009	23.79266122	0.975834151	0.35090681	0.613272118	-5.787994099	0.633370858	1	1	FA_8_3_UV - FA_8_3_noUV	Huh7	limma	0.35090681	0.613272118	FALSE	no hit	6.65736
SCIN	Q9Y6U3	Adseverin OS=Homo sapiens GN=SCIN PE=1 SV=4	1	1	NA	1	NA	8	8	NA	2	2	NA	3	3	NA	6.08657	6.08657	NA	TRUE	FALSE	TRUE	-0.167415023	23.54470207	-0.974173804	0.351693053	0.613696224	-5.789557724	0.633948887	1	1	FA_8_3_UV - FA_8_3_noUV	Huh7	limma	0.351693053	0.613696224	FALSE	no hit	6.08657
DLD	P09622	Dihydrolipoyl dehydrogenase, mitochondrial OS=Homo sapiens GN=DLD PE=1 SV=2	2	1	1	1	1	8	8	8	2	2	2	13	3	13	6.97685	6.43368	7.52002	TRUE	TRUE	TRUE	0.144660962	23.26446221	0.971078409	0.353162264	0.614966545	-5.792466901	0.635027105	1	1	FA_8_3_UV - FA_8_3_noUV	Huh7	limma	0.353162264	0.614966545	FALSE	no hit	6.43368
QARS	P47897|P47897-2	Glutamine--tRNA ligase OS=Homo sapiens GN=QARS PE=1 SV=1|Isoform 2 of Glutamine--tRNA ligase OS=Homo sapiens GN=QARS	1	1	NA	1	NA	8	8	NA	2	2	NA	4	4	NA	6.40963	6.40963	NA	TRUE	FALSE	TRUE	-0.134206665	23.47110537	-0.970346225	0.353510441	0.614966545	-5.793153912	0.63528226	1	1	FA_8_3_UV - FA_8_3_noUV	Huh7	limma	0.353510441	0.614966545	FALSE	no hit	6.40963
NUP85	J3KT10|Q9BW27|Q9BW27-3	Nuclear pore complex protein Nup85 OS=Homo sapiens GN=NUP85 PE=1 SV=1|Nuclear pore complex protein Nup85 OS=Homo sapiens GN=NUP85 PE=1 SV=1|Isoform 3 of Nuclear pore complex protein Nup85 OS=Homo sapiens GN=NUP85	1	1	NA	1	NA	8	8	NA	2	2	NA	2	2	NA	6.76632	6.76632	NA	TRUE	FALSE	TRUE	0.164450051	23.62608968	0.966803741	0.355198518	0.616952503	-5.796471762	0.636517373	1	1	FA_8_3_UV - FA_8_3_noUV	Huh7	limma	0.355198518	0.616952503	FALSE	no hit	6.76632
RPL17|RPL17-C18orf32	A0A087WXM6|A0A0A6YYL6|J3KRX5|J3QQT2|P18621|P18621-3	60S ribosomal protein L17 (Fragment) OS=Homo sapiens GN=RPL17 PE=3 SV=1|Protein RPL17-C18orf32 OS=Homo sapiens GN=RPL17-C18orf32 PE=3 SV=1|60S ribosomal protein L17 (Fragment) OS=Homo sapiens GN=RPL17 PE=3 SV=1|60S ribosomal protein L17 (Fragment) OS=Homo sapiens GN=RPL17 PE=3 SV=1|60S ribosomal protein L17 OS=Homo sapiens GN=RPL17 PE=1 SV=3|Isoform 3 of 60S ribosomal protein L17 OS=Homo sapiens …	2	1	1	1	1	8	8	8	2	2	2	5	4	5	6.981245	7.01531	6.94718	TRUE	TRUE	TRUE	-0.146179346	24.45026289	-0.961996493	0.357498599	0.619993731	-5.800958025	0.638195072	1	1	FA_8_3_UV - FA_8_3_noUV	Huh7	limma	0.357498599	0.619993731	FALSE	no hit	7.01531
FTO	Q9C0B1	Alpha-ketoglutarate-dependent dioxygenase FTO OS=Homo sapiens GN=FTO PE=1 SV=3	1	1	NA	1	NA	8	8	NA	2	2	NA	3	3	NA	6.32692	6.32692	NA	TRUE	FALSE	TRUE	-0.242502426	23.75604365	-0.958575811	0.359141798	0.621783815	-5.804138958	0.639389997	1	1	FA_8_3_UV - FA_8_3_noUV	Huh7	limma	0.359141798	0.621783815	FALSE	no hit	6.32692
HMGN1	A6NEL0|A6NL93|P05114	Non-histone chromosomal protein HMG-14 OS=Homo sapiens GN=HMGN1 PE=1 SV=1|Non-histone chromosomal protein HMG-14 OS=Homo sapiens GN=HMGN1 PE=1 SV=1|Non-histone chromosomal protein HMG-14 OS=Homo sapiens GN=HMGN1 PE=1 SV=3	2	1	1	1	1	8	8	8	2	2	2	3	2	3	6.841855	6.94785	6.73586	TRUE	TRUE	TRUE	0.168865793	24.37669304	0.957107396	0.35984885	0.621783815	-5.805501555	0.639903238	1	1	FA_8_3_UV - FA_8_3_noUV	Huh7	limma	0.35984885	0.621783815	FALSE	no hit	6.94785
SRSF11	Q05519|Q05519-2|Q5T760	Serine/arginine-rich splicing factor 11 OS=Homo sapiens GN=SRSF11 PE=1 SV=1|Isoform 2 of Serine/arginine-rich splicing factor 11 OS=Homo sapiens GN=SRSF11|Serine/arginine-rich-splicing factor 11 (Fragment) OS=Homo sapiens GN=SRSF11 PE=1 SV=1	1	1	NA	1	NA	8	8	NA	2	2	NA	2	2	NA	5.93048	5.93048	NA	TRUE	FALSE	TRUE	-0.269037808	22.27050756	-0.955878052	0.360441557	0.621783815	-5.806640967	0.64033305	1	1	FA_8_3_UV - FA_8_3_noUV	Huh7	limma	0.360441557	0.621783815	FALSE	no hit	5.93048
SYNE2	Q8WXH0|Q8WXH0-2	Nesprin-2 OS=Homo sapiens GN=SYNE2 PE=1 SV=3|Isoform 2 of Nesprin-2 OS=Homo sapiens GN=SYNE2	1	1	NA	1	NA	8	8	NA	2	2	NA	76	76	NA	7.43758	7.43758	NA	TRUE	FALSE	TRUE	0.318895253	28.87680856	0.955272555	0.360733746	0.621783815	-5.807201721	0.640544793	1	1	FA_8_3_UV - FA_8_3_noUV	Huh7	limma	0.360733746	0.621783815	FALSE	no hit	7.43758
TRIP11	Q15643	Thyroid receptor-interacting protein 11 OS=Homo sapiens GN=TRIP11 PE=1 SV=3	2	1	1	1	1	8	8	8	2	2	2	22	12	22	6.71845	6.71714	6.71976	TRUE	TRUE	TRUE	0.117691718	26.06077269	0.946578337	0.364948011	0.627807394	-5.815220691	0.643588387	1	1	FA_8_3_UV - FA_8_3_noUV	Huh7	limma	0.364948011	0.627807394	FALSE	no hit	6.71714
MATR3	A0A0R4J2E8|A8MXP9|P43243	Matrin-3 OS=Homo sapiens GN=MATR3 PE=1 SV=1|Matrin-3 OS=Homo sapiens GN=MATR3 PE=1 SV=2	2	1	1	1	1	8	8	8	2	2	2	10	10	10	7.101175	7.16876	7.03359	TRUE	TRUE	TRUE	0.119604368	26.13665025	0.945772227	0.365340529	0.627807394	-5.815961083	0.643870887	1	1	FA_8_3_UV - FA_8_3_noUV	Huh7	limma	0.365340529	0.627807394	FALSE	no hit	7.16876
PRPF4	O43172|O43172-2	U4/U6 small nuclear ribonucleoprotein Prp4 OS=Homo sapiens GN=PRPF4 PE=1 SV=2|Isoform 2 of U4/U6 small nuclear ribonucleoprotein Prp4 OS=Homo sapiens GN=PRPF4	1	1	NA	1	NA	8	8	NA	2	2	NA	2	2	NA	5.91798	5.91798	NA	TRUE	FALSE	TRUE	0.239712136	22.89062949	0.942768575	0.366805753	0.629001456	-5.818715204	0.644923965	1	1	FA_8_3_UV - FA_8_3_noUV	Huh7	limma	0.366805753	0.629001456	FALSE	no hit	5.91798
TXNRD1	A0A087WSW9|A0A087WSY9|E9PIR7|F8W809|Q16881|Q16881-2|Q16881-3|Q16881-4|Q16881-5|Q16881-6	Thioredoxin reductase 1, cytoplasmic OS=Homo sapiens GN=TXNRD1 PE=1 SV=1|Thioredoxin reductase 1, cytoplasmic OS=Homo sapiens GN=TXNRD1 PE=1 SV=2|Thioredoxin reductase 1, cytoplasmic OS=Homo sapiens GN=TXNRD1 PE=1 SV=1|Thioredoxin reductase 1, cytoplasmic OS=Homo sapiens GN=TXNRD1 PE=1 SV=1|Thioredoxin reductase 1, cytoplasmic OS=Homo sapiens GN=TXNRD1 PE=1 SV=3|Isoform 2 of Thioredoxin reductase…	2	1	1	1	1	8	8	8	2	2	2	11	8	11	7.653395	8.06309	7.2437	TRUE	TRUE	TRUE	-0.1758066	25.99941019	-0.942064835	0.367149654	0.629001456	-5.819359417	0.645170798	1	1	FA_8_3_UV - FA_8_3_noUV	Huh7	limma	0.367149654	0.629001456	FALSE	no hit	8.06309
POLR2B	C9J2Y9|C9J4M6|P30876	DNA-directed RNA polymerase subunit beta OS=Homo sapiens GN=POLR2B PE=1 SV=2|DNA-directed RNA polymerase subunit beta OS=Homo sapiens GN=POLR2B PE=1 SV=2|DNA-directed RNA polymerase II subunit RPB2 OS=Homo sapiens GN=POLR2B PE=1 SV=1	2	1	1	1	1	8	8	8	2	2	2	6	6	3	6.347435	6.64621	6.04866	TRUE	TRUE	TRUE	0.193054644	24.20129997	0.932903491	0.371647602	0.63574264	-5.827708929	0.648387659	1	1	FA_8_3_UV - FA_8_3_noUV	Huh7	limma	0.371647602	0.63574264	FALSE	no hit	6.64621
SRM	P19623	Spermidine synthase OS=Homo sapiens GN=SRM PE=1 SV=1	2	1	1	1	1	8	8	8	2	2	2	2	2	2	6.23992	6.43722	6.04262	TRUE	TRUE	TRUE	-0.354831174	23.22299772	-0.931406564	0.372386259	0.636042491	-5.829066677	0.648913908	1	1	FA_8_3_UV - FA_8_3_noUV	Huh7	limma	0.372386259	0.636042491	FALSE	no hit	6.43722
CENPV	Q7Z7K6|Q7Z7K6-3	Centromere protein V OS=Homo sapiens GN=CENPV PE=1 SV=1|Isoform 3 of Centromere protein V OS=Homo sapiens GN=CENPV	1	1	NA	1	NA	8	8	NA	2	2	NA	2	2	NA	6.11293	6.11293	NA	TRUE	FALSE	TRUE	0.222291764	22.02784686	0.929522412	0.373317474	0.636317841	-5.830773034	0.649576535	1	1	FA_8_3_UV - FA_8_3_noUV	Huh7	limma	0.373317474	0.636317841	FALSE	no hit	6.11293
SF3B2	A0A087WZZ5|E9PPJ0|Q13435	Splicing factor 3B subunit 2 OS=Homo sapiens GN=SF3B2 PE=1 SV=1|Splicing factor 3B subunit 2 OS=Homo sapiens GN=SF3B2 PE=1 SV=2	2	1	1	1	1	8	8	8	2	2	2	10	5	10	7.247935	7.56022	6.93565	TRUE	TRUE	TRUE	0.164380357	24.87207869	0.928094854	0.374024124	0.636317841	-5.832063943	0.650078771	1	1	FA_8_3_UV - FA_8_3_noUV	Huh7	limma	0.374024124	0.636317841	FALSE	no hit	7.56022
RBM39	H0Y4X3|Q14498|Q14498-2|Q14498-3	Isoform 2 of RNA-binding protein 39 OS=Homo sapiens GN=RBM39|Isoform 3 of RNA-binding protein 39 OS=Homo sapiens GN=RBM39|RNA-binding protein 39 (Fragment) OS=Homo sapiens GN=RBM39 PE=1 SV=7|RNA-binding protein 39 OS=Homo sapiens GN=RBM39 PE=1 SV=2	2	1	1	1	1	8	8	8	2	2	2	3	2	3	6.381765	6.62115	6.14238	TRUE	TRUE	TRUE	0.128300789	24.070702	0.927662548	0.374238305	0.636317841	-5.832454537	0.650230893	1	1	FA_8_3_UV - FA_8_3_noUV	Huh7	limma	0.374238305	0.636317841	FALSE	no hit	6.62115
PCM1	A6NNN6|E7ETA6|H0YBA1|Q15154|Q15154-2	Pericentriolar material 1 protein OS=Homo sapiens GN=PCM1 PE=1 SV=5|Pericentriolar material 1 protein OS=Homo sapiens GN=PCM1 PE=1 SV=1|Pericentriolar material 1 protein (Fragment) OS=Homo sapiens GN=PCM1 PE=1 SV=1|Pericentriolar material 1 protein OS=Homo sapiens GN=PCM1 PE=1 SV=4|Isoform 2 of Pericentriolar material 1 protein OS=Homo sapiens GN=PCM1	1	1	NA	1	NA	8	8	NA	2	2	NA	2	2	NA	5.56621	5.56621	NA	TRUE	FALSE	TRUE	0.17223433	21.37621622	0.925853336	0.375135602	0.636884354	-5.834087517	0.650867689	1	1	FA_8_3_UV - FA_8_3_noUV	Huh7	limma	0.375135602	0.636884354	FALSE	no hit	5.56621
PARVA	J3KNQ4|Q9NVD7	Alpha-parvin OS=Homo sapiens GN=PARVA PE=1 SV=1|Alpha-parvin OS=Homo sapiens GN=PARVA PE=1 SV=1	1	1	NA	1	NA	8	8	NA	2	2	NA	2	2	NA	6.00515	6.00515	NA	TRUE	FALSE	TRUE	-0.113497548	23.25248524	-0.918708246	0.378694169	0.641681809	-5.840510276	0.653385064	1	1	FA_8_3_UV - FA_8_3_noUV	Huh7	limma	0.378694169	0.641681809	FALSE	no hit	6.00515
HSPA1B|HSPA1A	A0A0G2JIW1|P0DMV8|P0DMV9	Heat shock 70 kDa protein 1B OS=Homo sapiens GN=HSPA1B PE=1 SV=1|Heat shock 70 kDa protein 1A OS=Homo sapiens GN=HSPA1A PE=1 SV=1|Heat shock 70 kDa protein 1B OS=Homo sapiens GN=HSPA1B PE=1 SV=1	1	1	NA	1	NA	8	8	NA	2	2	NA	6	6	NA	7.31284	7.31284	NA	TRUE	FALSE	TRUE	-0.156690273	25.09014184	-0.916845025	0.37962604	0.641681809	-5.842178211	0.654042169	1	1	FA_8_3_UV - FA_8_3_noUV	Huh7	limma	0.37962604	0.641681809	FALSE	no hit	7.31284
CENPF	P49454	Centromere protein F OS=Homo sapiens GN=CENPF PE=1 SV=2	1	1	NA	1	NA	8	8	NA	2	2	NA	20	20	NA	7.28173	7.28173	NA	TRUE	FALSE	TRUE	0.142078189	27.02040585	0.915756532	0.380171186	0.641681809	-5.84315129	0.654426173	1	1	FA_8_3_UV - FA_8_3_noUV	Huh7	limma	0.380171186	0.641681809	FALSE	no hit	7.28173
STAT3	G8JLH9|P40763|P40763-2|P40763-3	Signal transducer and activator of transcription OS=Homo sapiens GN=STAT3 PE=1 SV=1|Signal transducer and activator of transcription 3 OS=Homo sapiens GN=STAT3 PE=1 SV=2|Isoform Del-701 of Signal transducer and activator of transcription 3 OS=Homo sapiens GN=STAT3|Isoform 3 of Signal transducer and activator of transcription 3 OS=Homo sapiens GN=STAT3	1	1	NA	1	NA	8	8	NA	2	2	NA	2	2	NA	6.51629	6.51629	NA	TRUE	FALSE	TRUE	-0.100582534	23.97756318	-0.915629512	0.380234836	0.641681809	-5.843264778	0.65447099	1	1	FA_8_3_UV - FA_8_3_noUV	Huh7	limma	0.380234836	0.641681809	FALSE	no hit	6.51629
NUP98	H7C3P6|P52948|P52948-2|P52948-5|P52948-6	Isoform 2 of Nuclear pore complex protein Nup98-Nup96 OS=Homo sapiens GN=NUP98|Isoform 5 of Nuclear pore complex protein Nup98-Nup96 OS=Homo sapiens GN=NUP98|Isoform 6 of Nuclear pore complex protein Nup98-Nup96 OS=Homo sapiens GN=NUP98|Nuclear pore complex protein Nup98-Nup96 (Fragment) OS=Homo sapiens GN=NUP98 PE=1 SV=1|Nuclear pore complex protein Nup98-Nup96 OS=Homo sapiens GN=NUP98 PE=1 SV=4	2	1	1	1	1	8	8	8	2	2	2	4	4	2	6.19706	6.39302	6.0011	TRUE	TRUE	TRUE	0.211000029	23.91708327	0.910656092	0.382732965	0.644078554	-5.847697863	0.656226752	1	1	FA_8_3_UV - FA_8_3_noUV	Huh7	limma	0.382732965	0.644078554	FALSE	no hit	6.39302
SEC23A	F5H365|Q15436	Protein transport protein Sec23A OS=Homo sapiens GN=SEC23A PE=1 SV=1|Protein transport protein Sec23A OS=Homo sapiens GN=SEC23A PE=1 SV=2	1	1	NA	1	NA	8	8	NA	2	2	NA	2	2	NA	6.38469	6.38469	NA	TRUE	FALSE	TRUE	-0.128257652	23.25959636	-0.91017326	0.382976102	0.644078554	-5.848127145	0.656397307	1	1	FA_8_3_UV - FA_8_3_noUV	Huh7	limma	0.382976102	0.644078554	FALSE	no hit	6.38469
CTNNA1	G3XAM7|P35221|P35221-2	Catenin (Cadherin-associated protein), alpha 1, 102kDa, isoform CRA_a OS=Homo sapiens GN=CTNNA1 PE=1 SV=1|Catenin alpha-1 OS=Homo sapiens GN=CTNNA1 PE=1 SV=1|Isoform 2 of Catenin alpha-1 OS=Homo sapiens GN=CTNNA1	1	1	NA	1	NA	8	8	NA	2	2	NA	10	10	NA	7.05449	7.05449	NA	TRUE	FALSE	TRUE	0.251936579	25.94990326	0.909398426	0.383366509	0.644078554	-5.848815642	0.656671046	1	1	FA_8_3_UV - FA_8_3_noUV	Huh7	limma	0.383366509	0.644078554	FALSE	no hit	7.05449
TIMM44	M0QXU7|O43615	Mitochondrial import inner membrane translocase subunit TIM44 (Fragment) OS=Homo sapiens GN=TIMM44 PE=1 SV=1|Mitochondrial import inner membrane translocase subunit TIM44 OS=Homo sapiens GN=TIMM44 PE=1 SV=2	2	1	1	1	1	8	8	8	2	2	2	4	4	2	6.756225	6.7108	6.80165	TRUE	TRUE	TRUE	0.229922607	23.4675435	0.901412788	0.387406411	0.648176383	-5.855882396	0.65949495	1	1	FA_8_3_UV - FA_8_3_noUV	Huh7	limma	0.387406411	0.648176383	FALSE	no hit	6.7108
AP2B1	P63010|P63010-2|P63010-3	AP-2 complex subunit beta OS=Homo sapiens GN=AP2B1 PE=1 SV=1|Isoform 2 of AP-2 complex subunit beta OS=Homo sapiens GN=AP2B1|Isoform 3 of AP-2 complex subunit beta OS=Homo sapiens GN=AP2B1	2	1	1	1	1	8	8	8	2	2	2	7	7	5	6.404245	6.86083	5.94766	TRUE	TRUE	TRUE	0.127488762	25.44975295	0.900538156	0.387850687	0.648176383	-5.856653161	0.659804536	1	1	FA_8_3_UV - FA_8_3_noUV	Huh7	limma	0.387850687	0.648176383	FALSE	no hit	6.86083
GNAS	P63092|P63092-4|Q5JWF2|Q5JWF2-2	Guanine nucleotide-binding protein G(s) subunit alpha isoforms short OS=Homo sapiens GN=GNAS PE=1 SV=1|Isoform 4 of Guanine nucleotide-binding protein G(s) subunit alpha isoforms short OS=Homo sapiens GN=GNAS|Guanine nucleotide-binding protein G(s) subunit alpha isoforms XLas OS=Homo sapiens GN=GNAS PE=1 SV=2|Isoform XLas-2 of Guanine nucleotide-binding protein G(s) subunit alpha isoforms XLas OS…	1	1	NA	1	NA	8	8	NA	2	2	NA	4	4	NA	6.60561	6.60561	NA	TRUE	FALSE	TRUE	0.333699816	24.15486316	0.900480814	0.387879827	0.648176383	-5.856703671	0.659824834	1	1	FA_8_3_UV - FA_8_3_noUV	Huh7	limma	0.387879827	0.648176383	FALSE	no hit	6.60561
PCYT2	I3L1L9|I3L1R7|I3L2Q1|Q99447|Q99447-3	Ethanolamine-phosphate cytidylyltransferase (Fragment) OS=Homo sapiens GN=PCYT2 PE=1 SV=1|Ethanolamine-phosphate cytidylyltransferase OS=Homo sapiens GN=PCYT2 PE=1 SV=1|Ethanolamine-phosphate cytidylyltransferase (Fragment) OS=Homo sapiens GN=PCYT2 PE=1 SV=2|Ethanolamine-phosphate cytidylyltransferase OS=Homo sapiens GN=PCYT2 PE=1 SV=1|Isoform 3 of Ethanolamine-phosphate cytidylyltransferase OS=H…	1	1	NA	1	NA	8	8	NA	2	2	NA	2	2	NA	6.25156	6.25156	NA	TRUE	FALSE	TRUE	-0.189124594	22.5328602	-0.900043581	0.388102068	0.648176383	-5.857088721	0.659979622	1	1	FA_8_3_UV - FA_8_3_noUV	Huh7	limma	0.388102068	0.648176383	FALSE	no hit	6.25156
GALK2	B7ZAX5|Q01415|Q01415-2	N-acetylgalactosamine kinase OS=Homo sapiens GN=GALK2 PE=1 SV=1|N-acetylgalactosamine kinase OS=Homo sapiens GN=GALK2 PE=1 SV=1|Isoform 2 of N-acetylgalactosamine kinase OS=Homo sapiens GN=GALK2	1	1	NA	1	NA	8	8	NA	2	2	NA	2	2	NA	6.27151	6.27151	NA	TRUE	FALSE	TRUE	-0.259641556	23.51052341	-0.894206265	0.39107763	0.649768472	-5.862214071	0.662047515	1	1	FA_8_3_UV - FA_8_3_noUV	Huh7	limma	0.39107763	0.649768472	FALSE	no hit	6.27151
CBX1	J3KS05|P83916	Chromobox protein homolog 1 (Fragment) OS=Homo sapiens GN=CBX1 PE=1 SV=7|Chromobox protein homolog 1 OS=Homo sapiens GN=CBX1 PE=1 SV=1	1	1	NA	1	NA	8	8	NA	2	2	NA	2	2	NA	6.39264	6.39264	NA	TRUE	FALSE	TRUE	0.1483953	23.56357431	0.893836939	0.391266426	0.649768472	-5.862537392	0.662178437	1	1	FA_8_3_UV - FA_8_3_noUV	Huh7	limma	0.391266426	0.649768472	FALSE	no hit	6.39264
KHSRP	A0A087WTP3|Q92945	Far upstream element-binding protein 2 OS=Homo sapiens GN=KHSRP PE=1 SV=1|Far upstream element-binding protein 2 OS=Homo sapiens GN=KHSRP PE=1 SV=4	2	1	1	1	1	8	8	8	2	2	2	8	4	8	6.80645	6.67364	6.93926	TRUE	TRUE	TRUE	0.094224011	24.36414873	0.893670309	0.391351627	0.649768472	-5.86268323	0.662237509	1	1	FA_8_3_UV - FA_8_3_noUV	Huh7	limma	0.391351627	0.649768472	FALSE	no hit	6.67364
CRLF3	Q8IUI8|Q8IUI8-2	Cytokine receptor-like factor 3 OS=Homo sapiens GN=CRLF3 PE=1 SV=2|Isoform 2 of Cytokine receptor-like factor 3 OS=Homo sapiens GN=CRLF3	1	1	NA	1	NA	8	8	NA	2	2	NA	3	3	NA	6.48205	6.48205	NA	TRUE	FALSE	TRUE	-0.121284611	23.53903041	-0.893658922	0.39135745	0.649768472	-5.862693195	0.662241545	1	1	FA_8_3_UV - FA_8_3_noUV	Huh7	limma	0.39135745	0.649768472	FALSE	no hit	6.48205
TXN	P10599	Thioredoxin OS=Homo sapiens GN=TXN PE=1 SV=3	2	1	1	1	1	8	8	8	2	2	2	3	3	3	6.68371	6.77673	6.59069	TRUE	TRUE	TRUE	-0.20592298	23.30491444	-0.886159583	0.395205391	0.655193666	-5.869232567	0.664902311	1	1	FA_8_3_UV - FA_8_3_noUV	Huh7	limma	0.395205391	0.655193666	FALSE	no hit	6.77673
ARPC1B	O15143	Actin-related protein 2/3 complex subunit 1B OS=Homo sapiens GN=ARPC1B PE=1 SV=3	2	1	1	1	1	8	8	8	2	2	2	2	2	2	6.681735	6.90805	6.45542	TRUE	TRUE	TRUE	-0.135115087	23.55852219	-0.883834805	0.396403553	0.656061933	-5.871250173	0.665728003	1	1	FA_8_3_UV - FA_8_3_noUV	Huh7	limma	0.396403553	0.656061933	FALSE	no hit	6.90805
TTF2	Q9UNY4	Transcription termination factor 2 OS=Homo sapiens GN=TTF2 PE=1 SV=2	1	1	NA	1	NA	8	8	NA	2	2	NA	2	2	NA	7.86208	7.86208	NA	TRUE	FALSE	TRUE	-0.115883357	23.5456566	-0.88288979	0.39689132	0.656061933	-5.872069025	0.66606376	1	1	FA_8_3_UV - FA_8_3_noUV	Huh7	limma	0.39689132	0.656061933	FALSE	no hit	7.86208
NUP214	P35658|P35658-2|P35658-3|P35658-4|P35658-5	Nuclear pore complex protein Nup214 OS=Homo sapiens GN=NUP214 PE=1 SV=2|Isoform 2 of Nuclear pore complex protein Nup214 OS=Homo sapiens GN=NUP214|Isoform 3 of Nuclear pore complex protein Nup214 OS=Homo sapiens GN=NUP214|Isoform 4 of Nuclear pore complex protein Nup214 OS=Homo sapiens GN=NUP214|Isoform 5 of Nuclear pore complex protein Nup214 OS=Homo sapiens GN=NUP214	2	1	1	1	1	8	8	8	2	2	2	3	3	2	6.228925	6.52265	5.9352	TRUE	TRUE	TRUE	0.109713102	24.3170445	0.876784246	0.400052683	0.660261919	-5.877341327	0.668234625	1	1	FA_8_3_UV - FA_8_3_noUV	Huh7	limma	0.400052683	0.660261919	FALSE	no hit	6.52265
CSTF3	Q12996	Cleavage stimulation factor subunit 3 OS=Homo sapiens GN=CSTF3 PE=1 SV=1	1	1	NA	1	NA	8	8	NA	2	2	NA	2	2	NA	6.1837	6.1837	NA	TRUE	FALSE	TRUE	0.109874921	22.88077726	0.874969156	0.400995849	0.660261919	-5.878902643	0.668880529	1	1	FA_8_3_UV - FA_8_3_noUV	Huh7	limma	0.400995849	0.660261919	FALSE	no hit	6.1837
RNH1	P13489	Ribonuclease inhibitor OS=Homo sapiens GN=RNH1 PE=1 SV=2	2	1	1	1	1	8	8	8	2	2	2	12	5	12	7.248085	7.57599	6.92018	TRUE	TRUE	TRUE	-0.2567313	25.01564654	-0.873694621	0.401659045	0.660261919	-5.879997318	0.669334221	1	1	FA_8_3_UV - FA_8_3_noUV	Huh7	limma	0.401659045	0.660261919	FALSE	no hit	7.57599
CHD3	Q12873|Q12873-2|Q12873-3	Chromodomain-helicase-DNA-binding protein 3 OS=Homo sapiens GN=CHD3 PE=1 SV=3|Isoform 2 of Chromodomain-helicase-DNA-binding protein 3 OS=Homo sapiens GN=CHD3|Isoform 3 of Chromodomain-helicase-DNA-binding protein 3 OS=Homo sapiens GN=CHD3	1	1	NA	1	NA	8	8	NA	2	2	NA	2	2	NA	6.02007	6.02007	NA	TRUE	FALSE	TRUE	-0.107377152	23.297127	-0.871681001	0.402708355	0.660261919	-5.881723981	0.670051249	1	1	FA_8_3_UV - FA_8_3_noUV	Huh7	limma	0.402708355	0.660261919	FALSE	no hit	6.02007
PDIA3	H7BZJ3|P30101	Protein disulfide-isomerase A3 (Fragment) OS=Homo sapiens GN=PDIA3 PE=1 SV=1|Protein disulfide-isomerase A3 OS=Homo sapiens GN=PDIA3 PE=1 SV=4	2	1	1	1	1	8	8	8	2	2	2	21	18	21	7.67401	7.71526	7.63276	TRUE	TRUE	TRUE	0.120873877	26.67927406	0.871043249	0.403041084	0.660261919	-5.882270133	0.670278409	1	1	FA_8_3_UV - FA_8_3_noUV	Huh7	limma	0.403041084	0.660261919	FALSE	no hit	7.71526
TOP2B	E9PCY5|Q02880|Q02880-2	DNA topoisomerase 2-beta OS=Homo sapiens GN=TOP2B PE=1 SV=3|DNA topoisomerase 2 (Fragment) OS=Homo sapiens GN=TOP2B PE=1 SV=1|Isoform Beta-1 of DNA topoisomerase 2-beta OS=Homo sapiens GN=TOP2B	2	1	1	1	1	8	8	8	2	2	2	4	4	3	6.60568	6.68669	6.52467	TRUE	TRUE	TRUE	0.124046016	24.34286506	0.870803024	0.403166463	0.660261919	-5.882475765	0.670363982	1	1	FA_8_3_UV - FA_8_3_noUV	Huh7	limma	0.403166463	0.660261919	FALSE	no hit	6.68669
SPTAN1	Q13813|Q13813-3	Isoform 3 of Spectrin alpha chain, non-erythrocytic 1 OS=Homo sapiens GN=SPTAN1|Spectrin alpha chain, non-erythrocytic 1 OS=Homo sapiens GN=SPTAN1 PE=1 SV=3	2	1	1	1	1	8	8	8	2	2	2	67	67	35	7.46106	7.72019	7.20193	TRUE	TRUE	TRUE	0.106748312	28.67460651	0.869764998	0.403708544	0.660261919	-5.883363752	0.670733797	1	1	FA_8_3_UV - FA_8_3_noUV	Huh7	limma	0.403708544	0.660261919	FALSE	no hit	7.72019
HNRNPL	P14866	Heterogeneous nuclear ribonucleoprotein L OS=Homo sapiens GN=HNRNPL PE=1 SV=2	2	1	1	1	1	8	8	8	2	2	2	10	8	10	7.66129	7.84065	7.48193	TRUE	TRUE	TRUE	0.12808771	25.09577519	0.868995519	0.404110705	0.660261919	-5.884021419	0.671007988	1	1	FA_8_3_UV - FA_8_3_noUV	Huh7	limma	0.404110705	0.660261919	FALSE	no hit	7.84065
7-Sep	E7EPK1|E7ES33|G3V1Q4|Q16181|Q16181-2	Septin-7 OS=Homo sapiens GN=SEPT7 PE=1 SV=2|Septin-7 OS=Homo sapiens GN=SEPT7 PE=1 SV=3|Septin-7 OS=Homo sapiens GN=SEPT7 PE=1 SV=2|Septin-7 OS=Homo sapiens GN=SEPT7 PE=1 SV=2|Isoform 2 of Septin-7 OS=Homo sapiens GN=SEPT7	1	1	NA	1	NA	8	8	NA	2	2	NA	3	3	NA	6.46661	6.46661	NA	TRUE	FALSE	TRUE	-0.123607186	23.63973265	-0.867439567	0.40492475	0.660441435	-5.885349746	0.671562561	1	1	FA_8_3_UV - FA_8_3_noUV	Huh7	limma	0.40492475	0.660441435	FALSE	no hit	6.46661
NME1-NME2|NME2	J3KPD9|P22392-2|Q32Q12	Protein NME1-NME2 OS=Homo sapiens GN=NME1-NME2 PE=1 SV=1|Isoform 3 of Nucleoside diphosphate kinase B OS=Homo sapiens GN=NME2|Nucleoside diphosphate kinase OS=Homo sapiens GN=NME1-NME2 PE=1 SV=1	2	1	1	1	1	8	8	8	2	2	2	5	5	4	7.15583	7.59392	6.71774	TRUE	TRUE	TRUE	-0.150047358	26.00199755	-0.866550237	0.405390536	0.660441435	-5.88610805	0.671879617	1	1	FA_8_3_UV - FA_8_3_noUV	Huh7	limma	0.405390536	0.660441435	FALSE	no hit	7.59392
MRPL12	P52815	39S ribosomal protein L12, mitochondrial OS=Homo sapiens GN=MRPL12 PE=1 SV=2	1	1	NA	1	NA	8	8	NA	2	2	NA	3	3	NA	6.10952	6.10952	NA	TRUE	FALSE	TRUE	0.105817637	23.99761796	0.864067651	0.406692729	0.661214242	-5.888221325	0.672764995	1	1	FA_8_3_UV - FA_8_3_noUV	Huh7	limma	0.406692729	0.661214242	FALSE	no hit	6.10952
PPP3CA	Q08209-2|Q08209-3	Isoform 2 of Serine/threonine-protein phosphatase 2B catalytic subunit alpha isoform OS=Homo sapiens GN=PPP3CA|Isoform 3 of Serine/threonine-protein phosphatase 2B catalytic subunit alpha isoform OS=Homo sapiens GN=PPP3CA	1	1	NA	1	NA	8	8	NA	2	2	NA	4	4	NA	6.57165	6.57165	NA	TRUE	FALSE	TRUE	-0.143724817	23.8414358	-0.863413695	0.407036225	0.661214242	-5.888777126	0.672998293	1	1	FA_8_3_UV - FA_8_3_noUV	Huh7	limma	0.407036225	0.661214242	FALSE	no hit	6.57165
PFKP	Q01813|Q01813-2	ATP-dependent 6-phosphofructokinase, platelet type OS=Homo sapiens GN=PFKP PE=1 SV=2|Isoform 2 of ATP-dependent 6-phosphofructokinase, platelet type OS=Homo sapiens GN=PFKP	1	1	NA	1	NA	8	8	NA	2	2	NA	6	6	NA	6.87243	6.87243	NA	TRUE	FALSE	TRUE	-0.246893697	24.7745134	-0.862186391	0.407681413	0.661310797	-5.88981924	0.67343622	1	1	FA_8_3_UV - FA_8_3_noUV	Huh7	limma	0.407681413	0.661310797	FALSE	no hit	6.87243
DLG1	A0A0C4DFT3|E7EQD7|Q12959|Q12959-2|Q12959-3|Q12959-4|Q12959-5|Q12959-6|Q12959-7|Q12959-8|Q12959-9	Disks large homolog 1 OS=Homo sapiens GN=DLG1 PE=1 SV=1|Disks large homolog 1 OS=Homo sapiens GN=DLG1 PE=1 SV=1|Disks large homolog 1 OS=Homo sapiens GN=DLG1 PE=1 SV=2|Isoform 2 of Disks large homolog 1 OS=Homo sapiens GN=DLG1|Isoform 3 of Disks large homolog 1 OS=Homo sapiens GN=DLG1|Isoform 4 of Disks large homolog 1 OS=Homo sapiens GN=DLG1|Isoform 5 of Disks large homolog 1 OS=Homo sapiens GN=…	1	1	NA	1	NA	8	8	NA	2	2	NA	3	3	NA	6.36337	6.36337	NA	TRUE	FALSE	TRUE	0.098203456	24.24797197	0.859636313	0.409024209	0.662116229	-5.891980434	0.674346492	1	1	FA_8_3_UV - FA_8_3_noUV	Huh7	limma	0.409024209	0.662116229	FALSE	no hit	6.36337
PSMD8	K7EJC1|K7EJR3|P48556|R4GMR5	26S proteasome non-ATPase regulatory subunit 8 OS=Homo sapiens GN=PSMD8 PE=1 SV=1|26S proteasome non-ATPase regulatory subunit 8 (Fragment) OS=Homo sapiens GN=PSMD8 PE=1 SV=7|26S proteasome non-ATPase regulatory subunit 8 OS=Homo sapiens GN=PSMD8 PE=1 SV=2|26S proteasome non-ATPase regulatory subunit 8 OS=Homo sapiens GN=PSMD8 PE=1 SV=1	1	1	NA	1	NA	8	8	NA	2	2	NA	2	2	NA	6.35951	6.35951	NA	TRUE	FALSE	TRUE	0.10847444	22.78571518	0.859016828	0.409350866	0.662116229	-5.892504613	0.674567695	1	1	FA_8_3_UV - FA_8_3_noUV	Huh7	limma	0.409350866	0.662116229	FALSE	no hit	6.35951
HNRNPU	Q00839	Heterogeneous nuclear ribonucleoprotein U OS=Homo sapiens GN=HNRNPU PE=1 SV=6	2	1	1	1	1	8	8	8	2	2	2	24	8	24	8.23076	8.30417	8.15735	TRUE	TRUE	TRUE	0.170738473	26.11251954	0.856670709	0.4105896	0.663169755	-5.894486825	0.67540569	1	1	FA_8_3_UV - FA_8_3_noUV	Huh7	limma	0.4105896	0.663169755	FALSE	no hit	8.30417
TTLL12	Q14166	Tubulin--tyrosine ligase-like protein 12 OS=Homo sapiens GN=TTLL12 PE=1 SV=2	1	1	NA	1	NA	8	8	NA	2	2	NA	3	3	NA	6.45128	6.45128	NA	TRUE	FALSE	TRUE	-0.151781588	24.10185113	-0.855174794	0.411380764	0.663384317	-5.895748258	0.675940217	1	1	FA_8_3_UV - FA_8_3_noUV	Huh7	limma	0.411380764	0.663384317	FALSE	no hit	6.45128
DNAJA1	P31689	DnaJ homolog subfamily A member 1 OS=Homo sapiens GN=DNAJA1 PE=1 SV=2	1	1	NA	1	NA	8	8	NA	2	2	NA	6	6	NA	6.67512	6.67512	NA	TRUE	FALSE	TRUE	-0.138588574	24.60173045	-0.852619742	0.412734486	0.663384317	-5.897898393	0.676853576	1	1	FA_8_3_UV - FA_8_3_noUV	Huh7	limma	0.412734486	0.663384317	FALSE	no hit	6.67512
GPT2	Q8TD30|Q8TD30-2	Alanine aminotransferase 2 OS=Homo sapiens GN=GPT2 PE=1 SV=1|Isoform 2 of Alanine aminotransferase 2 OS=Homo sapiens GN=GPT2	1	1	NA	1	NA	8	8	NA	2	2	NA	2	2	NA	5.99952	5.99952	NA	TRUE	FALSE	TRUE	0.123963474	21.99677821	0.852399189	0.412851481	0.663384317	-5.898083732	0.67693244	1	1	FA_8_3_UV - FA_8_3_noUV	Huh7	limma	0.412851481	0.663384317	FALSE	no hit	5.99952
PRKDC	P78527|P78527-2	DNA-dependent protein kinase catalytic subunit OS=Homo sapiens GN=PRKDC PE=1 SV=3|Isoform 2 of DNA-dependent protein kinase catalytic subunit OS=Homo sapiens GN=PRKDC	2	1	1	1	1	8	8	8	2	2	2	35	35	9	6.772305	7.19228	6.35233	TRUE	TRUE	TRUE	0.187417661	27.66737293	0.851982115	0.413072785	0.663384317	-5.898434102	0.677081584	1	1	FA_8_3_UV - FA_8_3_noUV	Huh7	limma	0.413072785	0.663384317	FALSE	no hit	7.19228
HIP1	O00291|O00291-3|O00291-4	Huntingtin-interacting protein 1 OS=Homo sapiens GN=HIP1 PE=1 SV=5|Isoform 3 of Huntingtin-interacting protein 1 OS=Homo sapiens GN=HIP1|Isoform 4 of Huntingtin-interacting protein 1 OS=Homo sapiens GN=HIP1	1	1	NA	1	NA	8	8	NA	2	2	NA	5	5	NA	6.65606	6.65606	NA	TRUE	FALSE	TRUE	-0.099864061	24.34243979	-0.850363406	0.413932455	0.663621843	-5.899792515	0.677660548	1	1	FA_8_3_UV - FA_8_3_noUV	Huh7	limma	0.413932455	0.663621843	FALSE	no hit	6.65606
IQGAP1	P46940	Ras GTPase-activating-like protein IQGAP1 OS=Homo sapiens GN=IQGAP1 PE=1 SV=1	2	1	1	1	1	8	8	8	2	2	2	33	33	30	7.21906	7.85161	6.58651	TRUE	TRUE	TRUE	-0.116873219	28.04181822	-0.847952323	0.41521519	0.663621843	-5.90181173	0.678523275	1	1	FA_8_3_UV - FA_8_3_noUV	Huh7	limma	0.41521519	0.663621843	FALSE	no hit	7.85161
NUP205	Q92621	Nuclear pore complex protein Nup205 OS=Homo sapiens GN=NUP205 PE=1 SV=3	1	1	NA	1	NA	8	8	NA	2	2	NA	12	12	NA	7.03159	7.03159	NA	TRUE	FALSE	TRUE	0.136976795	25.86706344	0.847525623	0.415442481	0.663621843	-5.902168561	0.678675999	1	1	FA_8_3_UV - FA_8_3_noUV	Huh7	limma	0.415442481	0.663621843	FALSE	no hit	7.03159
GUSB	P08236|P08236-2|P08236-3	Beta-glucuronidase OS=Homo sapiens GN=GUSB PE=1 SV=2|Isoform 2 of Beta-glucuronidase OS=Homo sapiens GN=GUSB|Isoform 3 of Beta-glucuronidase OS=Homo sapiens GN=GUSB	1	1	NA	1	NA	8	8	NA	2	2	NA	4	4	NA	7.01931	7.01931	NA	TRUE	FALSE	TRUE	0.109975737	24.42705336	0.845301957	0.416628331	0.663621843	-5.904025593	0.679472106	1	1	FA_8_3_UV - FA_8_3_noUV	Huh7	limma	0.416628331	0.663621843	FALSE	no hit	7.01931
TKT	A0A0B4J1R6|P29401|P29401-2	Transketolase OS=Homo sapiens GN=TKT PE=1 SV=1|Transketolase OS=Homo sapiens GN=TKT PE=1 SV=3|Isoform 2 of Transketolase OS=Homo sapiens GN=TKT	2	1	1	1	1	8	8	8	2	2	2	11	11	8	7.19678	7.6575	6.73606	TRUE	TRUE	TRUE	-0.28362859	26.35852892	-0.844794048	0.416899514	0.663621843	-5.904449165	0.679653996	1	1	FA_8_3_UV - FA_8_3_noUV	Huh7	limma	0.416899514	0.663621843	FALSE	no hit	7.6575
CNOT1	A5YKK6|A5YKK6-2	CCR4-NOT transcription complex subunit 1 OS=Homo sapiens GN=CNOT1 PE=1 SV=2|Isoform 2 of CCR4-NOT transcription complex subunit 1 OS=Homo sapiens GN=CNOT1	1	1	NA	1	NA	8	8	NA	2	2	NA	3	3	NA	6.32049	6.32049	NA	TRUE	FALSE	TRUE	0.131871939	23.46980893	0.84389215	0.417381347	0.663621843	-5.905200758	0.679977025	1	1	FA_8_3_UV - FA_8_3_noUV	Huh7	limma	0.417381347	0.663621843	FALSE	no hit	6.32049
CSPG4	Q6UVK1	Chondroitin sulfate proteoglycan 4 OS=Homo sapiens GN=CSPG4 PE=1 SV=2	1	1	NA	1	NA	8	8	NA	2	2	NA	11	11	NA	7.01093	7.01093	NA	TRUE	FALSE	TRUE	0.108307904	25.47370419	0.842876922	0.417924177	0.663621843	-5.906045961	0.680340715	1	1	FA_8_3_UV - FA_8_3_noUV	Huh7	limma	0.417924177	0.663621843	FALSE	no hit	7.01093
KDELC1	Q6UW63	KDEL motif-containing protein 1 OS=Homo sapiens GN=KDELC1 PE=1 SV=1	1	1	NA	1	NA	8	8	NA	2	2	NA	8	8	NA	7.3842	7.3842	NA	TRUE	FALSE	TRUE	0.349464657	25.43426086	0.842471117	0.418141289	0.663621843	-5.906383555	0.680486109	1	1	FA_8_3_UV - FA_8_3_noUV	Huh7	limma	0.418141289	0.663621843	FALSE	no hit	7.3842
CTSD	P07339	Cathepsin D OS=Homo sapiens GN=CTSD PE=1 SV=1	2	1	1	1	1	8	8	8	2	2	2	12	2	12	7.268815	6.8254	7.71223	TRUE	TRUE	TRUE	0.324242322	24.39192519	0.841780692	0.418510852	0.663621843	-5.906957605	0.680733506	1	1	FA_8_3_UV - FA_8_3_noUV	Huh7	limma	0.418510852	0.663621843	FALSE	no hit	6.8254
NUTF2	P61970	Nuclear transport factor 2 OS=Homo sapiens GN=NUTF2 PE=1 SV=1	2	1	1	1	1	8	8	8	2	2	2	4	3	4	7.299055	7.71192	6.88619	TRUE	TRUE	TRUE	-0.15659272	24.98268104	-0.838501334	0.420269201	0.664579461	-5.909678613	0.681909052	1	1	FA_8_3_UV - FA_8_3_noUV	Huh7	limma	0.420269201	0.664579461	FALSE	no hit	7.71192
PHGDH	O43175	D-3-phosphoglycerate dehydrogenase OS=Homo sapiens GN=PHGDH PE=1 SV=4	2	1	1	1	1	8	8	8	2	2	2	4	4	3	6.302315	6.58181	6.02282	TRUE	TRUE	TRUE	-0.410172505	24.51729545	-0.838458764	0.420292059	0.664579461	-5.909713875	0.681924317	1	1	FA_8_3_UV - FA_8_3_noUV	Huh7	limma	0.420292059	0.664579461	FALSE	no hit	6.58181
DHX15	O43143	Pre-mRNA-splicing factor ATP-dependent RNA helicase DHX15 OS=Homo sapiens GN=DHX15 PE=1 SV=2	2	1	1	1	1	8	8	8	2	2	2	10	10	3	6.40787	7.07556	5.74018	TRUE	TRUE	TRUE	0.108555249	25.21333209	0.837086611	0.421029291	0.664665321	-5.910849607	0.682416424	1	1	FA_8_3_UV - FA_8_3_noUV	Huh7	limma	0.421029291	0.664665321	FALSE	no hit	7.07556
ALDH2	P05091	Aldehyde dehydrogenase, mitochondrial OS=Homo sapiens GN=ALDH2 PE=1 SV=2	2	1	1	1	1	8	8	8	2	2	2	18	12	18	7.059715	7.20874	6.91069	TRUE	TRUE	TRUE	0.108278348	26.39905578	0.835963536	0.421633346	0.664665321	-5.911777972	0.682819303	1	1	FA_8_3_UV - FA_8_3_noUV	Huh7	limma	0.421633346	0.664665321	FALSE	no hit	7.20874
KHDRBS1	Q07666|Q07666-2	KH domain-containing, RNA-binding, signal transduction-associated protein 1 OS=Homo sapiens GN=KHDRBS1 PE=1 SV=1|Isoform 2 of KH domain-containing, RNA-binding, signal transduction-associated protein 1 OS=Homo sapiens GN=KHDRBS1	2	1	1	1	1	8	8	8	2	2	2	6	3	6	6.98528	6.69123	7.27933	TRUE	TRUE	TRUE	0.190176279	24.31318098	0.835073411	0.42211252	0.664665321	-5.912513002	0.68313868	1	1	FA_8_3_UV - FA_8_3_noUV	Huh7	limma	0.42211252	0.664665321	FALSE	no hit	6.69123
STRN3	Q13033|Q13033-2	Striatin-3 OS=Homo sapiens GN=STRN3 PE=1 SV=3|Isoform Alpha of Striatin-3 OS=Homo sapiens GN=STRN3	1	1	NA	1	NA	8	8	NA	2	2	NA	2	2	NA	6.39945	6.39945	NA	TRUE	FALSE	TRUE	-0.131574157	23.21393716	-0.833862731	0.422764844	0.664765333	-5.913511637	0.683573164	1	1	FA_8_3_UV - FA_8_3_noUV	Huh7	limma	0.422764844	0.664765333	FALSE	no hit	6.39945
BAZ1B	Q9UIG0|Q9UIG0-2	Tyrosine-protein kinase BAZ1B OS=Homo sapiens GN=BAZ1B PE=1 SV=2|Isoform 2 of Tyrosine-protein kinase BAZ1B OS=Homo sapiens GN=BAZ1B	1	1	NA	1	NA	8	8	NA	2	2	NA	2	2	NA	6.63726	6.63726	NA	TRUE	FALSE	TRUE	0.160550784	23.81283826	0.831837097	0.423857784	0.665297605	-5.915179665	0.684300349	1	1	FA_8_3_UV - FA_8_3_noUV	Huh7	limma	0.423857784	0.665297605	FALSE	no hit	6.63726
BLVRA	P53004	Biliverdin reductase A OS=Homo sapiens GN=BLVRA PE=1 SV=2	1	1	NA	1	NA	8	8	NA	2	2	NA	2	2	NA	6.37715	6.37715	NA	TRUE	FALSE	TRUE	-0.193760454	22.73175005	-0.831051976	0.424281909	0.665297605	-5.915825229	0.684582279	1	1	FA_8_3_UV - FA_8_3_noUV	Huh7	limma	0.424281909	0.665297605	FALSE	no hit	6.37715
PRDX4	Q13162	Peroxiredoxin-4 OS=Homo sapiens GN=PRDX4 PE=1 SV=1	2	1	1	1	1	8	8	8	2	2	2	10	10	8	7.30307	7.62676	6.97938	TRUE	TRUE	TRUE	0.165315709	25.83795758	0.829268098	0.425246623	0.665885489	-5.917290039	0.685223018	1	1	FA_8_3_UV - FA_8_3_noUV	Huh7	limma	0.425246623	0.665885489	FALSE	no hit	7.62676
NENF	Q9UMX5	Neudesin OS=Homo sapiens GN=NENF PE=1 SV=1	2	1	1	1	1	8	8	8	2	2	2	6	6	5	6.87472	7.04304	6.7064	TRUE	TRUE	TRUE	0.247237877	24.9399616	0.826973068	0.426489924	0.666907375	-5.91917053	0.686047687	1	1	FA_8_3_UV - FA_8_3_noUV	Huh7	limma	0.426489924	0.666907375	FALSE	no hit	7.04304
GOLIM4	F8W785|O00461	Golgi integral membrane protein 4 OS=Homo sapiens GN=GOLIM4 PE=1 SV=1|Golgi integral membrane protein 4 OS=Homo sapiens GN=GOLIM4 PE=1 SV=1	2	1	1	1	1	8	8	8	2	2	2	12	4	12	6.95577	6.68941	7.22213	TRUE	TRUE	TRUE	-0.155627559	23.6025322	-0.82450992	0.427827003	0.668072872	-5.921183703	0.686933182	1	1	FA_8_3_UV - FA_8_3_noUV	Huh7	limma	0.427827003	0.668072872	FALSE	no hit	6.68941
SCFD1	Q8WVM8	Sec1 family domain-containing protein 1 OS=Homo sapiens GN=SCFD1 PE=1 SV=4	1	1	NA	1	NA	8	8	NA	2	2	NA	4	4	NA	6.75433	6.75433	NA	TRUE	FALSE	TRUE	0.101255707	23.78101914	0.818613542	0.431039106	0.669649871	-5.925981557	0.689054657	1	1	FA_8_3_UV - FA_8_3_noUV	Huh7	limma	0.431039106	0.669649871	FALSE	no hit	6.75433
GTF2I	P78347|P78347-2|P78347-3|P78347-4	General transcription factor II-I OS=Homo sapiens GN=GTF2I PE=1 SV=2|Isoform 2 of General transcription factor II-I OS=Homo sapiens GN=GTF2I|Isoform 3 of General transcription factor II-I OS=Homo sapiens GN=GTF2I|Isoform 4 of General transcription factor II-I OS=Homo sapiens GN=GTF2I	2	1	1	1	1	8	8	8	2	2	2	5	5	4	6.18276	6.45876	5.90676	TRUE	TRUE	TRUE	0.160387916	24.45560991	0.817150103	0.431838806	0.669649871	-5.927167676	0.689581572	1	1	FA_8_3_UV - FA_8_3_noUV	Huh7	limma	0.431838806	0.669649871	FALSE	no hit	6.45876
SIAE	Q9HAT2|Q9HAT2-2	Sialate O-acetylesterase OS=Homo sapiens GN=SIAE PE=1 SV=1|Isoform 2 of Sialate O-acetylesterase OS=Homo sapiens GN=SIAE	1	1	NA	1	NA	8	8	NA	2	2	NA	2	2	NA	7.12235	7.12235	NA	TRUE	FALSE	TRUE	0.167876705	24.20898771	0.816832849	0.432012301	0.669649871	-5.927424565	0.68969582	1	1	FA_8_3_UV - FA_8_3_noUV	Huh7	limma	0.432012301	0.669649871	FALSE	no hit	7.12235
HSPE1-MOB4	S4R3N1	Protein HSPE1-MOB4 OS=Homo sapiens GN=HSPE1-MOB4 PE=3 SV=1	1	1	NA	1	NA	8	8	NA	2	2	NA	2	2	NA	6.74349	6.74349	NA	TRUE	FALSE	TRUE	-0.113598517	23.01426491	-0.815870797	0.432538693	0.669649871	-5.92820303	0.690042313	1	1	FA_8_3_UV - FA_8_3_noUV	Huh7	limma	0.432538693	0.669649871	FALSE	no hit	6.74349
USP9X	Q93008|Q93008-1	Probable ubiquitin carboxyl-terminal hydrolase FAF-X OS=Homo sapiens GN=USP9X PE=1 SV=3|Isoform 2 of Probable ubiquitin carboxyl-terminal hydrolase FAF-X OS=Homo sapiens GN=USP9X	1	1	NA	1	NA	8	8	NA	2	2	NA	17	17	NA	7.10955	7.10955	NA	TRUE	FALSE	TRUE	-0.078466703	26.05101961	-0.815005282	0.433012629	0.669649871	-5.928902692	0.690354092	1	1	FA_8_3_UV - FA_8_3_noUV	Huh7	limma	0.433012629	0.669649871	FALSE	no hit	7.10955
USP7	Q93009|Q93009-3	Isoform 3 of Ubiquitin carboxyl-terminal hydrolase 7 OS=Homo sapiens GN=USP7|Ubiquitin carboxyl-terminal hydrolase 7 OS=Homo sapiens GN=USP7 PE=1 SV=2	2	1	1	1	1	8	8	8	2	2	2	15	15	10	6.966405	7.13585	6.79696	TRUE	TRUE	TRUE	0.114552062	25.94660417	0.814632293	0.433216975	0.669649871	-5.929204006	0.690488468	1	1	FA_8_3_UV - FA_8_3_noUV	Huh7	limma	0.433216975	0.669649871	FALSE	no hit	7.13585
C7orf55-LUC7L2|LUC7L2|C7orf55	A0A0A6YYC3|A0A0A6YYJ8|Q96HJ9-2|Q9Y383|Q9Y383-2|Q9Y383-3	Protein C7orf55-LUC7L2 OS=Homo sapiens GN=C7orf55-LUC7L2 PE=4 SV=1|Putative RNA-binding protein Luc7-like 2 OS=Homo sapiens GN=LUC7L2 PE=4 SV=1|Isoform 2 of UPF0562 protein C7orf55 OS=Homo sapiens GN=C7orf55|Putative RNA-binding protein Luc7-like 2 OS=Homo sapiens GN=LUC7L2 PE=1 SV=2|Isoform 2 of Putative RNA-binding protein Luc7-like 2 OS=Homo sapiens GN=LUC7L2|Isoform 3 of Putative RNA-binding …	1	1	NA	1	NA	8	8	NA	2	2	NA	2	2	NA	6.98971	6.98971	NA	TRUE	FALSE	TRUE	0.173191833	23.4499848	0.813858824	0.433640933	0.669649871	-5.929828458	0.690767155	1	1	FA_8_3_UV - FA_8_3_noUV	Huh7	limma	0.433640933	0.669649871	FALSE	no hit	6.98971
SUPT6H	Q7KZ85	Transcription elongation factor SPT6 OS=Homo sapiens GN=SUPT6H PE=1 SV=2	2	1	1	1	1	8	8	8	2	2	2	11	11	2	6.177065	6.87287	5.48126	TRUE	TRUE	TRUE	0.1281055	25.43768439	0.813698863	0.433728646	0.669649871	-5.929957536	0.690824796	1	1	FA_8_3_UV - FA_8_3_noUV	Huh7	limma	0.433728646	0.669649871	FALSE	no hit	6.87287
LACTB2	Q53H82	Beta-lactamase-like protein 2 OS=Homo sapiens GN=LACTB2 PE=1 SV=2	2	1	1	1	1	8	8	8	2	2	2	7	2	7	6.56269	6.51171	6.61367	TRUE	TRUE	TRUE	0.111681287	22.41984736	0.812884973	0.434175116	0.669649871	-5.930613946	0.691118101	1	1	FA_8_3_UV - FA_8_3_noUV	Huh7	limma	0.434175116	0.669649871	FALSE	no hit	6.51171
RPS4X	P62701	40S ribosomal protein S4, X isoform OS=Homo sapiens GN=RPS4X PE=1 SV=2	2	1	1	1	1	8	8	8	2	2	2	4	4	3	6.558505	6.84454	6.27247	TRUE	TRUE	TRUE	-0.133410486	24.87940562	-0.810880246	0.435276133	0.669758766	-5.932228315	0.691840751	1	1	FA_8_3_UV - FA_8_3_noUV	Huh7	limma	0.435276133	0.669758766	FALSE	no hit	6.84454
MDH1	B9A041|P40925|P40925-2|P40925-3	Isoform 2 of Malate dehydrogenase, cytoplasmic OS=Homo sapiens GN=MDH1|Isoform 3 of Malate dehydrogenase, cytoplasmic OS=Homo sapiens GN=MDH1|Malate dehydrogenase, cytoplasmic OS=Homo sapiens GN=MDH1 PE=1 SV=1|Malate dehydrogenase, cytoplasmic OS=Homo sapiens GN=MDH1 PE=1 SV=4	2	1	1	1	1	8	8	8	2	2	2	9	4	9	7.03926	6.85111	7.22741	TRUE	TRUE	TRUE	-0.178440239	24.29711868	-0.810596384	0.435432183	0.669758766	-5.932456621	0.691943099	1	1	FA_8_3_UV - FA_8_3_noUV	Huh7	limma	0.435432183	0.669758766	FALSE	no hit	6.85111
NPC2	E7EMS2|G3V2V8|G3V3D1|G3V3E8|J3KMY5|P61916|P61916-2	Epididymal secretory protein E1 OS=Homo sapiens GN=NPC2 PE=1 SV=1|Epididymal secretory protein E1 (Fragment) OS=Homo sapiens GN=NPC2 PE=1 SV=1|Epididymal secretory protein E1 (Fragment) OS=Homo sapiens GN=NPC2 PE=1 SV=1|Epididymal secretory protein E1 OS=Homo sapiens GN=NPC2 PE=1 SV=1|Epididymal secretory protein E1 OS=Homo sapiens GN=NPC2 PE=1 SV=1|Epididymal secretory protein E1 OS=Homo sapiens…	1	1	NA	1	NA	8	8	NA	2	2	NA	2	2	NA	6.38456	6.38456	NA	TRUE	FALSE	TRUE	0.194451211	23.3648045	0.808302474	0.436694586	0.670748874	-5.934298998	0.692770382	1	1	FA_8_3_UV - FA_8_3_noUV	Huh7	limma	0.436694586	0.670748874	FALSE	no hit	6.38456
RSL1D1	I3L3C4|J3QSV6|O76021	Ribosomal L1 domain-containing protein 1 (Fragment) OS=Homo sapiens GN=RSL1D1 PE=1 SV=1|Ribosomal L1 domain-containing protein 1 (Fragment) OS=Homo sapiens GN=RSL1D1 PE=1 SV=1|Ribosomal L1 domain-containing protein 1 OS=Homo sapiens GN=RSL1D1 PE=1 SV=3	1	1	NA	1	NA	8	8	NA	2	2	NA	4	4	NA	6.33752	6.33752	NA	TRUE	FALSE	TRUE	0.099342398	24.13297784	0.805530667	0.438223211	0.670748874	-5.936519074	0.693770504	1	1	FA_8_3_UV - FA_8_3_noUV	Huh7	limma	0.438223211	0.670748874	FALSE	no hit	6.33752
RAP1GDS1	P52306|P52306-4|P52306-5	Rap1 GTPase-GDP dissociation stimulator 1 OS=Homo sapiens GN=RAP1GDS1 PE=1 SV=3|Isoform 4 of Rap1 GTPase-GDP dissociation stimulator 1 OS=Homo sapiens GN=RAP1GDS1|Isoform 5 of Rap1 GTPase-GDP dissociation stimulator 1 OS=Homo sapiens GN=RAP1GDS1	1	1	NA	1	NA	8	8	NA	2	2	NA	9	9	NA	6.67922	6.67922	NA	TRUE	FALSE	TRUE	-0.171481524	25.15720054	-0.805146241	0.438435497	0.670748874	-5.93682645	0.693909255	1	1	FA_8_3_UV - FA_8_3_noUV	Huh7	limma	0.438435497	0.670748874	FALSE	no hit	6.67922
ITGB1	P05556	Integrin beta-1 OS=Homo sapiens GN=ITGB1 PE=1 SV=2	1	1	NA	1	NA	8	8	NA	2	2	NA	5	5	NA	6.56856	6.56856	NA	TRUE	FALSE	TRUE	0.14525952	24.91969303	0.803191706	0.439515867	0.670748874	-5.93838724	0.694614862	1	1	FA_8_3_UV - FA_8_3_noUV	Huh7	limma	0.439515867	0.670748874	FALSE	no hit	6.56856
LAS1L	Q9Y4W2|Q9Y4W2-2|Q9Y4W2-4	Ribosomal biogenesis protein LAS1L OS=Homo sapiens GN=LAS1L PE=1 SV=2|Isoform 2 of Ribosomal biogenesis protein LAS1L OS=Homo sapiens GN=LAS1L|Isoform 4 of Ribosomal biogenesis protein LAS1L OS=Homo sapiens GN=LAS1L	1	1	NA	1	NA	8	8	NA	2	2	NA	2	2	NA	5.49136	5.49136	NA	TRUE	FALSE	TRUE	0.152923721	21.6679797	0.80258305	0.43985266	0.670748874	-5.938872598	0.694834647	1	1	FA_8_3_UV - FA_8_3_noUV	Huh7	limma	0.43985266	0.670748874	FALSE	no hit	5.49136
NUP88	I3L245|Q99567	Nuclear pore complex protein Nup88 (Fragment) OS=Homo sapiens GN=NUP88 PE=1 SV=1|Nuclear pore complex protein Nup88 OS=Homo sapiens GN=NUP88 PE=1 SV=2	1	1	NA	1	NA	8	8	NA	2	2	NA	7	7	NA	6.96653	6.96653	NA	TRUE	FALSE	TRUE	0.116915223	25.51563733	0.802514638	0.439890526	0.670748874	-5.938927132	0.694859353	1	1	FA_8_3_UV - FA_8_3_noUV	Huh7	limma	0.439890526	0.670748874	FALSE	no hit	6.96653
CARS	P49589|P49589-3	Cysteine--tRNA ligase, cytoplasmic OS=Homo sapiens GN=CARS PE=1 SV=3|Isoform 3 of Cysteine--tRNA ligase, cytoplasmic OS=Homo sapiens GN=CARS	1	1	NA	1	NA	8	8	NA	2	2	NA	4	4	NA	6.46367	6.46367	NA	TRUE	FALSE	TRUE	-0.195504143	24.49095266	-0.80189309	0.440234647	0.670748874	-5.9394224	0.695083823	1	1	FA_8_3_UV - FA_8_3_noUV	Huh7	limma	0.440234647	0.670748874	FALSE	no hit	6.46367
TXNDC5	Q8NBS9|Q8NBS9-2	Isoform 2 of Thioredoxin domain-containing protein 5 OS=Homo sapiens GN=TXNDC5|Thioredoxin domain-containing protein 5 OS=Homo sapiens GN=TXNDC5 PE=1 SV=2	2	1	1	1	1	8	8	8	2	2	2	12	12	9	7.38112	7.71132	7.05092	TRUE	TRUE	TRUE	0.086319819	26.12324208	0.798162735	0.442303681	0.672263494	-5.942387745	0.696431589	1	1	FA_8_3_UV - FA_8_3_noUV	Huh7	limma	0.442303681	0.672263494	FALSE	no hit	7.71132
BOP1	Q14137|Q14137-2	Ribosome biogenesis protein BOP1 OS=Homo sapiens GN=BOP1 PE=1 SV=2|Isoform 2 of Ribosome biogenesis protein BOP1 OS=Homo sapiens GN=BOP1	1	1	NA	1	NA	8	8	NA	2	2	NA	3	3	NA	6.36291	6.36291	NA	TRUE	FALSE	TRUE	0.120630325	23.8217829	0.797954004	0.442419642	0.672263494	-5.94255331	0.696507031	1	1	FA_8_3_UV - FA_8_3_noUV	Huh7	limma	0.442419642	0.672263494	FALSE	no hit	6.36291
MCM3	P25205|P25205-2	DNA replication licensing factor MCM3 OS=Homo sapiens GN=MCM3 PE=1 SV=3|Isoform 2 of DNA replication licensing factor MCM3 OS=Homo sapiens GN=MCM3	1	1	NA	1	NA	8	8	NA	2	2	NA	10	10	NA	7.07647	7.07647	NA	TRUE	FALSE	TRUE	-0.195044645	25.52451036	-0.791190024	0.446188157	0.677078534	-5.947897776	0.698953378	1	1	FA_8_3_UV - FA_8_3_noUV	Huh7	limma	0.446188157	0.677078534	FALSE	no hit	7.07647
EFHD2	Q96C19	EF-hand domain-containing protein D2 OS=Homo sapiens GN=EFHD2 PE=1 SV=1	2	1	1	1	1	8	8	8	2	2	2	4	2	4	6.19114	6.30352	6.07876	TRUE	TRUE	TRUE	-0.147194836	23.44369528	-0.78444174	0.449968752	0.681375649	-5.953189731	0.701397166	1	1	FA_8_3_UV - FA_8_3_noUV	Huh7	limma	0.449968752	0.681375649	FALSE	no hit	6.30352
RFC3	P40938|P40938-2	Replication factor C subunit 3 OS=Homo sapiens GN=RFC3 PE=1 SV=2|Isoform 2 of Replication factor C subunit 3 OS=Homo sapiens GN=RFC3	1	1	NA	1	NA	8	8	NA	2	2	NA	4	4	NA	6.35666	6.35666	NA	TRUE	FALSE	TRUE	0.103210525	24.35117326	0.782025816	0.451327275	0.681375649	-5.955074518	0.70227281	1	1	FA_8_3_UV - FA_8_3_noUV	Huh7	limma	0.451327275	0.681375649	FALSE	no hit	6.35666
ACTR2	P61160|P61160-2	Actin-related protein 2 OS=Homo sapiens GN=ACTR2 PE=1 SV=1|Isoform 2 of Actin-related protein 2 OS=Homo sapiens GN=ACTR2	2	1	1	1	1	8	8	8	2	2	2	4	4	3	6.517135	6.82848	6.20579	TRUE	TRUE	TRUE	0.078734513	24.37908346	0.781373322	0.451694642	0.681375649	-5.955582679	0.702509372	1	1	FA_8_3_UV - FA_8_3_noUV	Huh7	limma	0.451694642	0.681375649	FALSE	no hit	6.82848
RPS6KA3	P51812	Ribosomal protein S6 kinase alpha-3 OS=Homo sapiens GN=RPS6KA3 PE=1 SV=1	1	1	NA	1	NA	8	8	NA	2	2	NA	4	4	NA	6.05907	6.05907	NA	TRUE	FALSE	TRUE	-0.111863565	23.60686246	-0.780180152	0.45236692	0.681375649	-5.956510942	0.702942031	1	1	FA_8_3_UV - FA_8_3_noUV	Huh7	limma	0.45236692	0.681375649	FALSE	no hit	6.05907
GSR	P00390|P00390-2|P00390-3	Glutathione reductase, mitochondrial OS=Homo sapiens GN=GSR PE=1 SV=2|Isoform Cytoplasmic of Glutathione reductase, mitochondrial OS=Homo sapiens GN=GSR|Isoform 2 of Glutathione reductase, mitochondrial OS=Homo sapiens GN=GSR	2	1	1	1	1	8	8	8	2	2	2	6	4	6	6.68189	6.93634	6.42744	TRUE	TRUE	TRUE	0.116203737	24.46845971	0.780150027	0.452383902	0.681375649	-5.956534363	0.702952956	1	1	FA_8_3_UV - FA_8_3_noUV	Huh7	limma	0.452383902	0.681375649	FALSE	no hit	6.93634
OPA1	E5KLJ5|E5KLJ6|E5KLJ9|E5KLK1|O60313|O60313-2	Dynamin-like 120 kDa protein, mitochondrial OS=Homo sapiens GN=OPA1 PE=1 SV=1|Dynamin-like 120 kDa protein, mitochondrial OS=Homo sapiens GN=OPA1 PE=1 SV=1|Dynamin-like 120 kDa protein, mitochondrial OS=Homo sapiens GN=OPA1 PE=1 SV=1|Dynamin-like 120 kDa protein, mitochondrial OS=Homo sapiens GN=OPA1 PE=1 SV=1|Dynamin-like 120 kDa protein, mitochondrial OS=Homo sapiens GN=OPA1 PE=1 SV=3|Isoform 2…	1	1	NA	1	NA	8	8	NA	2	2	NA	3	3	NA	6.38274	6.38274	NA	TRUE	FALSE	TRUE	0.121572379	23.61376233	0.778385907	0.453379088	0.681375649	-5.957904461	0.703592828	1	1	FA_8_3_UV - FA_8_3_noUV	Huh7	limma	0.453379088	0.681375649	FALSE	no hit	6.38274
SEC16A	A0A0C4DH09|F1T0I1|J3KNL6|O15027|O15027-2|O15027-3|O15027-4|O15027-5|X6RGP5	Protein transport protein Sec16A (Fragment) OS=Homo sapiens GN=SEC16A PE=1 SV=1|Protein transport protein Sec16A OS=Homo sapiens GN=SEC16A PE=1 SV=1|Protein transport protein Sec16A OS=Homo sapiens GN=SEC16A PE=1 SV=1|Protein transport protein Sec16A OS=Homo sapiens GN=SEC16A PE=1 SV=3|Isoform 2 of Protein transport protein Sec16A OS=Homo sapiens GN=SEC16A|Isoform 3 of Protein transport protein S…	1	1	NA	1	NA	8	8	NA	2	2	NA	2	2	NA	6.54542	6.54542	NA	TRUE	FALSE	TRUE	0.158496428	22.99702749	0.778152253	0.453511005	0.681375649	-5.958085722	0.703677594	1	1	FA_8_3_UV - FA_8_3_noUV	Huh7	limma	0.453511005	0.681375649	FALSE	no hit	6.54542
H1F0	P07305	Histone H1.0 OS=Homo sapiens GN=H1F0 PE=1 SV=3	2	1	1	1	1	8	8	8	2	2	2	4	3	4	6.82229	6.79247	6.85211	TRUE	TRUE	TRUE	0.155458709	24.51511018	0.777555406	0.453848085	0.681375649	-5.958548515	0.703894136	1	1	FA_8_3_UV - FA_8_3_noUV	Huh7	limma	0.453848085	0.681375649	FALSE	no hit	6.79247
SHMT1	P34896|P34896-2|P34896-3	Serine hydroxymethyltransferase, cytosolic OS=Homo sapiens GN=SHMT1 PE=1 SV=1|Isoform 2 of Serine hydroxymethyltransferase, cytosolic OS=Homo sapiens GN=SHMT1|Isoform 3 of Serine hydroxymethyltransferase, cytosolic OS=Homo sapiens GN=SHMT1	1	1	NA	1	NA	8	8	NA	2	2	NA	3	3	NA	6.34739	6.34739	NA	TRUE	FALSE	TRUE	-0.109700208	24.00369457	-0.772571869	0.456668953	0.684700197	-5.962400411	0.705703151	1	1	FA_8_3_UV - FA_8_3_noUV	Huh7	limma	0.456668953	0.684700197	FALSE	no hit	6.34739
MCM6	Q14566	DNA replication licensing factor MCM6 OS=Homo sapiens GN=MCM6 PE=1 SV=1	2	1	1	1	1	8	8	8	2	2	2	16	16	2	6.777905	7.29078	6.26503	TRUE	TRUE	TRUE	-0.172647368	26.31089985	-0.769990598	0.458134483	0.685986513	-5.964386878	0.706640803	1	1	FA_8_3_UV - FA_8_3_noUV	Huh7	limma	0.458134483	0.685986513	FALSE	no hit	7.29078
GBAS	O75323	Protein NipSnap homolog 2 OS=Homo sapiens GN=GBAS PE=1 SV=1	1	1	NA	1	NA	8	8	NA	2	2	NA	2	2	NA	6.68747	6.68747	NA	TRUE	FALSE	TRUE	0.181515875	23.92024696	0.768137592	0.459188399	0.68664982	-5.965809246	0.707314185	1	1	FA_8_3_UV - FA_8_3_noUV	Huh7	limma	0.459188399	0.68664982	FALSE	no hit	6.68747
PPIB	P23284	Peptidyl-prolyl cis-trans isomerase B OS=Homo sapiens GN=PPIB PE=1 SV=2	2	1	1	1	1	8	8	8	2	2	2	10	8	10	7.669665	7.66571	7.67362	TRUE	TRUE	TRUE	0.176846718	26.46675429	0.766515597	0.460112204	0.68664982	-5.967051786	0.707903807	1	1	FA_8_3_UV - FA_8_3_noUV	Huh7	limma	0.460112204	0.68664982	FALSE	no hit	7.66571
COPB2	P35606|P35606-2	Coatomer subunit beta' OS=Homo sapiens GN=COPB2 PE=1 SV=2|Isoform 2 of Coatomer subunit beta' OS=Homo sapiens GN=COPB2	1	1	NA	1	NA	8	8	NA	2	2	NA	9	9	NA	7.01707	7.01707	NA	TRUE	FALSE	TRUE	-0.104788927	25.63256314	-0.766007123	0.460402049	0.68664982	-5.967440823	0.708088681	1	1	FA_8_3_UV - FA_8_3_noUV	Huh7	limma	0.460402049	0.68664982	FALSE	no hit	7.01707
FSCN1	Q16658	Fascin OS=Homo sapiens GN=FSCN1 PE=1 SV=3	2	1	1	1	1	8	8	8	2	2	2	7	5	7	6.64603	6.78873	6.50333	TRUE	TRUE	TRUE	-0.291712049	24.22793136	-0.762690954	0.462295239	0.688563753	-5.969972407	0.709294819	1	1	FA_8_3_UV - FA_8_3_noUV	Huh7	limma	0.462295239	0.688563753	FALSE	no hit	6.78873
RPS3	E9PL09|P23396|P23396-2	40S ribosomal protein S3 OS=Homo sapiens GN=RPS3 PE=1 SV=1|40S ribosomal protein S3 OS=Homo sapiens GN=RPS3 PE=1 SV=2|Isoform 2 of 40S ribosomal protein S3 OS=Homo sapiens GN=RPS3	2	1	1	1	1	8	8	8	2	2	2	10	10	8	6.982115	7.40395	6.56028	TRUE	TRUE	TRUE	-0.097550884	25.92267569	-0.758824733	0.46450873	0.689734459	-5.97291153	0.710701939	1	1	FA_8_3_UV - FA_8_3_noUV	Huh7	limma	0.46450873	0.689734459	FALSE	no hit	7.40395
SYNCRIP	O60506|O60506-2	Heterogeneous nuclear ribonucleoprotein Q OS=Homo sapiens GN=SYNCRIP PE=1 SV=2|Isoform 2 of Heterogeneous nuclear ribonucleoprotein Q OS=Homo sapiens GN=SYNCRIP	2	1	1	1	1	8	8	8	2	2	2	10	8	10	7.13938	7.0489	7.22986	TRUE	TRUE	TRUE	-0.102635316	24.95615537	-0.758699003	0.464580826	0.689734459	-5.973006887	0.710747715	1	1	FA_8_3_UV - FA_8_3_noUV	Huh7	limma	0.464580826	0.689734459	FALSE	no hit	7.0489
ERP44	Q9BS26	Endoplasmic reticulum resident protein 44 OS=Homo sapiens GN=ERP44 PE=1 SV=1	2	1	1	1	1	8	8	8	2	2	2	15	10	15	7.33329	7.18227	7.48431	TRUE	TRUE	TRUE	0.160693029	26.29033858	0.757707868	0.465149416	0.689734459	-5.973758094	0.711108608	1	1	FA_8_3_UV - FA_8_3_noUV	Huh7	limma	0.465149416	0.689734459	FALSE	no hit	7.18227
CTNNB1	B4DGU4|P35222	Catenin beta-1 OS=Homo sapiens GN=CTNNB1 PE=1 SV=1|Catenin beta-1 OS=Homo sapiens GN=CTNNB1 PE=1 SV=1	1	1	NA	1	NA	8	8	NA	2	2	NA	5	5	NA	6.94317	6.94317	NA	TRUE	FALSE	TRUE	0.221945767	25.25795245	0.757053696	0.46552494	0.689734459	-5.974253427	0.711346841	1	1	FA_8_3_UV - FA_8_3_noUV	Huh7	limma	0.46552494	0.689734459	FALSE	no hit	6.94317
SERPINE1	P05121	Plasminogen activator inhibitor 1 OS=Homo sapiens GN=SERPINE1 PE=1 SV=1	1	1	NA	1	NA	8	8	NA	2	2	NA	2	2	NA	6.19363	6.19363	NA	TRUE	FALSE	TRUE	0.267177544	22.86191003	0.75532813	0.466516422	0.690297562	-5.975558177	0.711975385	1	1	FA_8_3_UV - FA_8_3_noUV	Huh7	limma	0.466516422	0.690297562	FALSE	no hit	6.19363
GALE	Q14376|Q14376-2|Q5QPP3|Q5QPP4	UDP-glucose 4-epimerase OS=Homo sapiens GN=GALE PE=1 SV=2|Isoform 2 of UDP-glucose 4-epimerase OS=Homo sapiens GN=GALE|UDP-glucose 4-epimerase (Fragment) OS=Homo sapiens GN=GALE PE=1 SV=1|UDP-glucose 4-epimerase (Fragment) OS=Homo sapiens GN=GALE PE=1 SV=1	1	1	NA	1	NA	8	8	NA	2	2	NA	2	2	NA	6.75169	6.75169	NA	TRUE	FALSE	TRUE	-0.166998422	23.60955178	-0.747375737	0.471103072	0.696016988	-5.981536773	0.714874597	1	1	FA_8_3_UV - FA_8_3_noUV	Huh7	limma	0.471103072	0.696016988	FALSE	no hit	6.75169
PDE12	F6T1Q0|Q6L8Q7|Q6L8Q7-2	2',5'-phosphodiesterase 12 OS=Homo sapiens GN=PDE12 PE=1 SV=1|2',5'-phosphodiesterase 12 OS=Homo sapiens GN=PDE12 PE=1 SV=2|Isoform 2 of 2',5'-phosphodiesterase 12 OS=Homo sapiens GN=PDE12	1	1	NA	1	NA	8	8	NA	2	2	NA	3	3	NA	6.30243	6.30243	NA	TRUE	FALSE	TRUE	0.089018427	24.08156785	0.746491718	0.4716147	0.696016988	-5.982197877	0.715197139	1	1	FA_8_3_UV - FA_8_3_noUV	Huh7	limma	0.4716147	0.696016988	FALSE	no hit	6.30243
EDC4	Q6P2E9	Enhancer of mRNA-decapping protein 4 OS=Homo sapiens GN=EDC4 PE=1 SV=1	1	1	NA	1	NA	8	8	NA	2	2	NA	3	3	NA	6.47961	6.47961	NA	TRUE	FALSE	TRUE	-0.096141692	23.1112793	-0.743665737	0.473252596	0.69711583	-5.984306549	0.716228566	1	1	FA_8_3_UV - FA_8_3_noUV	Huh7	limma	0.473252596	0.69711583	FALSE	no hit	6.47961
CKB	P12277	Creatine kinase B-type OS=Homo sapiens GN=CKB PE=1 SV=1	2	1	1	1	1	8	8	8	2	2	2	4	2	4	6.13657	6.17213	6.10101	TRUE	TRUE	TRUE	-0.230610456	22.44873187	-0.743077136	0.473594191	0.69711583	-5.984744844	0.716443459	1	1	FA_8_3_UV - FA_8_3_noUV	Huh7	limma	0.473594191	0.69711583	FALSE	no hit	6.17213
MTHFD2	P13995|P13995-2	Bifunctional methylenetetrahydrofolate dehydrogenase/cyclohydrolase, mitochondrial OS=Homo sapiens GN=MTHFD2 PE=1 SV=2|Isoform 2 of Bifunctional methylenetetrahydrofolate dehydrogenase/cyclohydrolase, mitochondrial OS=Homo sapiens GN=MTHFD2	1	1	NA	1	NA	8	8	NA	2	2	NA	3	3	NA	6.73537	6.73537	NA	TRUE	FALSE	TRUE	0.148416576	23.19016196	0.741215716	0.474675492	0.697797696	-5.986128882	0.717123195	1	1	FA_8_3_UV - FA_8_3_noUV	Huh7	limma	0.474675492	0.697797696	FALSE	no hit	6.73537
HNRNPM	A0A087X0X3|P52272|P52272-2	Heterogeneous nuclear ribonucleoprotein M OS=Homo sapiens GN=HNRNPM PE=1 SV=1|Heterogeneous nuclear ribonucleoprotein M OS=Homo sapiens GN=HNRNPM PE=1 SV=3|Isoform 2 of Heterogeneous nuclear ribonucleoprotein M OS=Homo sapiens GN=HNRNPM	2	1	1	1	1	8	8	8	2	2	2	16	7	16	7.071455	6.89042	7.25249	TRUE	TRUE	TRUE	0.104931294	25.21701182	0.739320107	0.475778249	0.697890695	-5.987535137	0.717815646	1	1	FA_8_3_UV - FA_8_3_noUV	Huh7	limma	0.475778249	0.697890695	FALSE	no hit	6.89042
COA7	Q96BR5	Cytochrome c oxidase assembly factor 7 OS=Homo sapiens GN=COA7 PE=1 SV=2	1	1	NA	1	NA	8	8	NA	2	2	NA	2	2	NA	6.60319	6.60319	NA	TRUE	FALSE	TRUE	-0.132548325	23.37680502	-0.738982097	0.475975053	0.697890695	-5.98778555	0.717939143	1	1	FA_8_3_UV - FA_8_3_noUV	Huh7	limma	0.475975053	0.697890695	FALSE	no hit	6.60319
ACTR1A	P61163	Alpha-centractin OS=Homo sapiens GN=ACTR1A PE=1 SV=1	1	1	NA	1	NA	8	8	NA	2	2	NA	2	2	NA	6.84716	6.84716	NA	TRUE	FALSE	TRUE	-0.108323043	23.45690699	-0.735219561	0.478169218	0.700198505	-5.99056605	0.719314335	1	1	FA_8_3_UV - FA_8_3_noUV	Huh7	limma	0.478169218	0.700198505	FALSE	no hit	6.84716
RANGAP1	P46060	Ran GTPase-activating protein 1 OS=Homo sapiens GN=RANGAP1 PE=1 SV=1	1	1	NA	1	NA	8	8	NA	2	2	NA	6	6	NA	7.02796	7.02796	NA	TRUE	FALSE	TRUE	-0.134748871	24.70924068	-0.729009025	0.481804802	0.704608319	-5.995127676	0.721586249	1	1	FA_8_3_UV - FA_8_3_noUV	Huh7	limma	0.481804802	0.704608319	FALSE	no hit	7.02796
APP	E9PG40|H7C0V9|P05067|P05067-11|P05067-7|P05067-8|P05067-9	Amyloid beta A4 protein OS=Homo sapiens GN=APP PE=1 SV=1|Amyloid beta A4 protein (Fragment) OS=Homo sapiens GN=APP PE=1 SV=1|Amyloid beta A4 protein OS=Homo sapiens GN=APP PE=1 SV=3|Isoform 11 of Amyloid beta A4 protein OS=Homo sapiens GN=APP|Isoform L-APP733 of Amyloid beta A4 protein OS=Homo sapiens GN=APP|Isoform APP751 of Amyloid beta A4 protein OS=Homo sapiens GN=APP|Isoform L-APP752 of Amyl…	1	1	NA	1	NA	8	8	NA	2	2	NA	4	4	NA	6.78739	6.78739	NA	TRUE	FALSE	TRUE	0.098955536	24.34377031	0.726622076	0.483206675	0.705744289	-5.996871611	0.722460088	1	1	FA_8_3_UV - FA_8_3_noUV	Huh7	limma	0.483206675	0.705744289	FALSE	no hit	6.78739
DIEXF	Q68CQ4	Digestive organ expansion factor homolog OS=Homo sapiens GN=DIEXF PE=1 SV=2	1	1	NA	1	NA	8	8	NA	2	2	NA	2	2	NA	6.15416	6.15416	NA	TRUE	FALSE	TRUE	0.090766347	23.13762925	0.72411534	0.48468163	0.706983928	-5.998697513	0.723378171	1	1	FA_8_3_UV - FA_8_3_noUV	Huh7	limma	0.48468163	0.706983928	FALSE	no hit	6.15416
RPL18	G3V203|H0YHA7|J3QQ67|Q07020|Q07020-2	60S ribosomal protein L18 (Fragment) OS=Homo sapiens GN=RPL18 PE=1 SV=1|60S ribosomal protein L18 OS=Homo sapiens GN=RPL18 PE=1 SV=1|60S ribosomal protein L18 OS=Homo sapiens GN=RPL18 PE=1 SV=2|Isoform 2 of 60S ribosomal protein L18 OS=Homo sapiens GN=RPL18	2	1	1	1	1	8	8	8	2	2	2	4	3	4	6.52128	6.79333	6.24923	TRUE	TRUE	TRUE	0.130765402	23.49715056	0.72123837	0.486377873	0.707969008	-6.000786074	0.72443234	1	1	FA_8_3_UV - FA_8_3_noUV	Huh7	limma	0.486377873	0.707969008	FALSE	no hit	6.79333
HEXIM1	O94992	Protein HEXIM1 OS=Homo sapiens GN=HEXIM1 PE=1 SV=1	1	1	NA	1	NA	8	8	NA	2	2	NA	2	2	NA	6.72521	6.72521	NA	TRUE	FALSE	TRUE	0.093138308	22.80953326	0.720040399	0.487085274	0.707969008	-6.001653538	0.724871451	1	1	FA_8_3_UV - FA_8_3_noUV	Huh7	limma	0.487085274	0.707969008	FALSE	no hit	6.72521
RPL13A	M0QYS1|P40429	60S ribosomal protein L13a (Fragment) OS=Homo sapiens GN=RPL13A PE=1 SV=2|60S ribosomal protein L13a OS=Homo sapiens GN=RPL13A PE=1 SV=2	2	1	1	1	1	8	8	8	2	2	2	3	3	2	6.608685	6.65098	6.56639	TRUE	TRUE	TRUE	0.10329664	23.75604816	0.719781576	0.487238192	0.707969008	-6.001840784	0.724966334	1	1	FA_8_3_UV - FA_8_3_noUV	Huh7	limma	0.487238192	0.707969008	FALSE	no hit	6.65098
FLII	Q13045|Q13045-2|Q13045-3	Protein flightless-1 homolog OS=Homo sapiens GN=FLII PE=1 SV=2|Isoform 2 of Protein flightless-1 homolog OS=Homo sapiens GN=FLII|Isoform 3 of Protein flightless-1 homolog OS=Homo sapiens GN=FLII	1	1	NA	1	NA	8	8	NA	2	2	NA	5	5	NA	6.67533	6.67533	NA	TRUE	FALSE	TRUE	-0.104537513	24.35112645	-0.713781498	0.490791495	0.712215421	-6.00616448	0.727167091	1	1	FA_8_3_UV - FA_8_3_noUV	Huh7	limma	0.490791495	0.712215421	FALSE	no hit	6.67533
G6PD	P11413|P11413-2|P11413-3	Glucose-6-phosphate 1-dehydrogenase OS=Homo sapiens GN=G6PD PE=1 SV=4|Isoform Long of Glucose-6-phosphate 1-dehydrogenase OS=Homo sapiens GN=G6PD|Isoform 3 of Glucose-6-phosphate 1-dehydrogenase OS=Homo sapiens GN=G6PD	1	1	NA	1	NA	8	8	NA	2	2	NA	9	9	NA	7.54378	7.54378	NA	TRUE	FALSE	TRUE	-0.299269016	25.38401514	-0.708191879	0.49411605	0.715325344	-6.010162922	0.729219325	1	1	FA_8_3_UV - FA_8_3_noUV	Huh7	limma	0.49411605	0.715325344	FALSE	no hit	7.54378
ACTN1	P12814|P12814-2|P12814-3|P12814-4	Alpha-actinin-1 OS=Homo sapiens GN=ACTN1 PE=1 SV=2|Isoform 2 of Alpha-actinin-1 OS=Homo sapiens GN=ACTN1|Isoform 3 of Alpha-actinin-1 OS=Homo sapiens GN=ACTN1|Isoform 4 of Alpha-actinin-1 OS=Homo sapiens GN=ACTN1	2	1	1	1	1	8	8	8	2	2	2	19	19	11	7.112455	7.61155	6.61336	TRUE	TRUE	TRUE	0.085896979	26.86286219	0.708048107	0.494201744	0.715325344	-6.010265392	0.729272137	1	1	FA_8_3_UV - FA_8_3_noUV	Huh7	limma	0.494201744	0.715325344	FALSE	no hit	7.61155
MAP2K2	P36507	Dual specificity mitogen-activated protein kinase kinase 2 OS=Homo sapiens GN=MAP2K2 PE=1 SV=1	1	1	NA	1	NA	8	8	NA	2	2	NA	2	2	NA	6.26258	6.26258	NA	TRUE	FALSE	TRUE	-0.176257359	23.22602442	-0.704829909	0.496122299	0.716443142	-6.012554132	0.730454612	1	1	FA_8_3_UV - FA_8_3_noUV	Huh7	limma	0.496122299	0.716443142	FALSE	no hit	6.26258
SRRT	Q9BXP5|Q9BXP5-2|Q9BXP5-3|Q9BXP5-4|Q9BXP5-5	Isoform 2 of Serrate RNA effector molecule homolog OS=Homo sapiens GN=SRRT|Isoform 3 of Serrate RNA effector molecule homolog OS=Homo sapiens GN=SRRT|Isoform 4 of Serrate RNA effector molecule homolog OS=Homo sapiens GN=SRRT|Isoform 5 of Serrate RNA effector molecule homolog OS=Homo sapiens GN=SRRT|Serrate RNA effector molecule homolog OS=Homo sapiens GN=SRRT PE=1 SV=1	2	1	1	1	1	8	8	8	2	2	2	9	9	7	6.844445	6.94462	6.74427	TRUE	TRUE	TRUE	0.091595021	25.11926356	0.704227933	0.496482053	0.716443142	-6.012981199	0.73067587	1	1	FA_8_3_UV - FA_8_3_noUV	Huh7	limma	0.496482053	0.716443142	FALSE	no hit	6.94462
SSRP1	Q08945	FACT complex subunit SSRP1 OS=Homo sapiens GN=SSRP1 PE=1 SV=1	1	1	NA	1	NA	8	8	NA	2	2	NA	2	2	NA	6.09495	6.09495	NA	TRUE	FALSE	TRUE	-0.096637303	22.39766152	-0.703566119	0.49687775	0.716443142	-6.013450336	0.730919147	1	1	FA_8_3_UV - FA_8_3_noUV	Huh7	limma	0.49687775	0.716443142	FALSE	no hit	6.09495
APEH	C9JIF9|P13798	Acylamino-acid-releasing enzyme OS=Homo sapiens GN=APEH PE=1 SV=1|Acylamino-acid-releasing enzyme OS=Homo sapiens GN=APEH PE=1 SV=4	2	1	1	1	1	8	8	8	2	2	2	7	2	7	6.50446	6.39174	6.61718	TRUE	TRUE	TRUE	-0.223699933	23.3903407	-0.700604667	0.498650759	0.717966346	-6.015544702	0.732008082	1	1	FA_8_3_UV - FA_8_3_noUV	Huh7	limma	0.498650759	0.717966346	FALSE	no hit	6.39174
HNRNPUL2-BSCL2|HNRNPUL2	H3BQZ7|Q1KMD3	HCG2044799 OS=Homo sapiens GN=HNRNPUL2-BSCL2 PE=4 SV=1|Heterogeneous nuclear ribonucleoprotein U-like protein 2 OS=Homo sapiens GN=HNRNPUL2 PE=1 SV=1	2	1	1	1	1	8	8	8	2	2	2	13	13	10	7.23538	7.41073	7.06003	TRUE	TRUE	TRUE	0.078419528	26.35110155	0.699554275	0.49928055	0.717966346	-6.016285622	0.732394445	1	1	FA_8_3_UV - FA_8_3_noUV	Huh7	limma	0.49928055	0.717966346	FALSE	no hit	7.41073
AKR1B10	O60218	Aldo-keto reductase family 1 member B10 OS=Homo sapiens GN=AKR1B10 PE=1 SV=2	1	1	NA	1	NA	8	8	NA	2	2	NA	8	8	NA	7.26511	7.26511	NA	TRUE	FALSE	TRUE	-0.32911865	25.32690115	-0.698423092	0.499959323	0.717966346	-6.0170824	0.7328106	1	1	FA_8_3_UV - FA_8_3_noUV	Huh7	limma	0.499959323	0.717966346	FALSE	no hit	7.26511
PSAT1	Q9Y617|Q9Y617-2	Phosphoserine aminotransferase OS=Homo sapiens GN=PSAT1 PE=1 SV=2|Isoform 2 of Phosphoserine aminotransferase OS=Homo sapiens GN=PSAT1	2	1	1	1	1	8	8	8	2	2	2	8	8	2	6.319415	7.00915	5.62968	TRUE	TRUE	TRUE	-0.261612337	25.28540328	-0.697559558	0.500477869	0.717966346	-6.017689864	0.733128342	1	1	FA_8_3_UV - FA_8_3_noUV	Huh7	limma	0.500477869	0.717966346	FALSE	no hit	7.00915
RAD50	Q92878|Q92878-2|Q92878-3	DNA repair protein RAD50 OS=Homo sapiens GN=RAD50 PE=1 SV=1|Isoform 2 of DNA repair protein RAD50 OS=Homo sapiens GN=RAD50|Isoform 3 of DNA repair protein RAD50 OS=Homo sapiens GN=RAD50	1	1	NA	1	NA	8	8	NA	2	2	NA	2	2	NA	5.91202	5.91202	NA	TRUE	FALSE	TRUE	0.081901842	22.6917376	0.695110638	0.501950207	0.7191647	-6.019408871	0.734029682	1	1	FA_8_3_UV - FA_8_3_noUV	Huh7	limma	0.501950207	0.7191647	FALSE	no hit	5.91202
AP1B1	Q10567|Q10567-2|Q10567-3|Q10567-4	AP-1 complex subunit beta-1 OS=Homo sapiens GN=AP1B1 PE=1 SV=2|Isoform B of AP-1 complex subunit beta-1 OS=Homo sapiens GN=AP1B1|Isoform C of AP-1 complex subunit beta-1 OS=Homo sapiens GN=AP1B1|Isoform 4 of AP-1 complex subunit beta-1 OS=Homo sapiens GN=AP1B1	1	1	NA	1	NA	8	8	NA	2	2	NA	5	5	NA	6.58891	6.58891	NA	TRUE	FALSE	TRUE	-0.095505319	24.66257043	-0.69361389	0.502851374	0.719542714	-6.020456798	0.734580751	1	1	FA_8_3_UV - FA_8_3_noUV	Huh7	limma	0.502851374	0.719542714	FALSE	no hit	6.58891
HNRNPAB	A0A087WZV1|D6R9P3|D6RBZ0|D6RD18|Q99729-2|Q99729-3	Heterogeneous nuclear ribonucleoprotein A/B OS=Homo sapiens GN=HNRNPAB PE=1 SV=1|Heterogeneous nuclear ribonucleoprotein A/B OS=Homo sapiens GN=HNRNPAB PE=1 SV=1|Heterogeneous nuclear ribonucleoprotein A/B OS=Homo sapiens GN=HNRNPAB PE=1 SV=1|Heterogeneous nuclear ribonucleoprotein A/B OS=Homo sapiens GN=HNRNPAB PE=1 SV=1|Isoform 2 of Heterogeneous nuclear ribonucleoprotein A/B OS=Homo sapiens GN…	2	1	1	1	1	8	8	8	2	2	2	7	3	7	7.05555	7.05269	7.05841	TRUE	TRUE	TRUE	0.112967052	24.7037425	0.684650772	0.50826839	0.725993713	-6.026689145	0.737883618	1	1	FA_8_3_UV - FA_8_3_noUV	Huh7	limma	0.50826839	0.725993713	FALSE	no hit	7.05269
ADSS	P30520	Adenylosuccinate synthetase isozyme 2 OS=Homo sapiens GN=ADSS PE=1 SV=3	1	1	NA	1	NA	8	8	NA	2	2	NA	3	3	NA	6.10798	6.10798	NA	TRUE	FALSE	TRUE	-0.163631325	23.04623587	-0.683415876	0.509017464	0.725993713	-6.027542016	0.738339053	1	1	FA_8_3_UV - FA_8_3_noUV	Huh7	limma	0.509017464	0.725993713	FALSE	no hit	6.10798
HEXA	H3BP20|H3BS10|P06865	Beta-hexosaminidase OS=Homo sapiens GN=HEXA PE=1 SV=1|Beta-hexosaminidase subunit alpha OS=Homo sapiens GN=HEXA PE=1 SV=2	2	1	1	1	1	8	8	8	2	2	2	12	9	12	7.769655	7.88903	7.65028	TRUE	TRUE	TRUE	0.131064151	26.12365682	0.68214544	0.509788789	0.725993713	-6.028417966	0.738807691	1	1	FA_8_3_UV - FA_8_3_noUV	Huh7	limma	0.509788789	0.725993713	FALSE	no hit	7.88903
GARS	P41250	Glycine--tRNA ligase OS=Homo sapiens GN=GARS PE=1 SV=3	2	1	1	1	1	8	8	8	2	2	2	11	11	5	6.91314	7.698	6.12828	TRUE	TRUE	TRUE	-0.187502629	26.46871354	-0.680598442	0.51072897	0.725993713	-6.029482593	0.739378477	1	1	FA_8_3_UV - FA_8_3_noUV	Huh7	limma	0.51072897	0.725993713	FALSE	no hit	7.698
GFAP	P14136|P14136-2|P14136-3	Glial fibrillary acidic protein OS=Homo sapiens GN=GFAP PE=1 SV=1|Isoform 2 of Glial fibrillary acidic protein OS=Homo sapiens GN=GFAP|Isoform 3 of Glial fibrillary acidic protein OS=Homo sapiens GN=GFAP	1	1	NA	1	NA	8	8	NA	2	2	NA	9	9	NA	7.38836	7.38836	NA	TRUE	FALSE	TRUE	0.100591529	25.341514	0.680005594	0.511089546	0.725993713	-6.029889999	0.739597255	1	1	FA_8_3_UV - FA_8_3_noUV	Huh7	limma	0.511089546	0.725993713	FALSE	no hit	7.38836
CHD1	O14646|O14646-2	Chromodomain-helicase-DNA-binding protein 1 OS=Homo sapiens GN=CHD1 PE=1 SV=2|Isoform 2 of Chromodomain-helicase-DNA-binding protein 1 OS=Homo sapiens GN=CHD1	1	1	NA	1	NA	8	8	NA	2	2	NA	2	2	NA	6.1721	6.1721	NA	TRUE	FALSE	TRUE	0.117454064	23.42544651	0.67979463	0.511217893	0.725993713	-6.030034896	0.739675112	1	1	FA_8_3_UV - FA_8_3_noUV	Huh7	limma	0.511217893	0.725993713	FALSE	no hit	6.1721
SDAD1	Q9NVU7|Q9NVU7-2	Protein SDA1 homolog OS=Homo sapiens GN=SDAD1 PE=1 SV=3|Isoform 2 of Protein SDA1 homolog OS=Homo sapiens GN=SDAD1	1	1	NA	1	NA	8	8	NA	2	2	NA	2	2	NA	5.98574	5.98574	NA	TRUE	FALSE	TRUE	0.103481762	22.83948861	0.677796713	0.512434352	0.726408486	-6.031405092	0.74041258	1	1	FA_8_3_UV - FA_8_3_noUV	Huh7	limma	0.512434352	0.726408486	FALSE	no hit	5.98574
PDS5A	Q29RF7	Sister chromatid cohesion protein PDS5 homolog A OS=Homo sapiens GN=PDS5A PE=1 SV=1	1	1	NA	1	NA	8	8	NA	2	2	NA	3	3	NA	6.11365	6.11365	NA	TRUE	FALSE	TRUE	0.182439067	23.79542579	0.676619733	0.513151781	0.726408486	-6.032210554	0.740847137	1	1	FA_8_3_UV - FA_8_3_noUV	Huh7	limma	0.513151781	0.726408486	FALSE	no hit	6.11365
ASNS	P08243|P08243-2|P08243-3	Asparagine synthetase [glutamine-hydrolyzing] OS=Homo sapiens GN=ASNS PE=1 SV=4|Isoform 2 of Asparagine synthetase [glutamine-hydrolyzing] OS=Homo sapiens GN=ASNS|Isoform 3 of Asparagine synthetase [glutamine-hydrolyzing] OS=Homo sapiens GN=ASNS	2	1	1	1	1	8	8	8	2	2	2	6	6	4	6.38559	6.95143	5.81975	TRUE	TRUE	TRUE	-0.174733547	24.74727858	-0.676146864	0.513440187	0.726408486	-6.0325338	0.74102175	1	1	FA_8_3_UV - FA_8_3_noUV	Huh7	limma	0.513440187	0.726408486	FALSE	no hit	6.95143
UPF1	Q92900|Q92900-2	Regulator of nonsense transcripts 1 OS=Homo sapiens GN=UPF1 PE=1 SV=2|Isoform 2 of Regulator of nonsense transcripts 1 OS=Homo sapiens GN=UPF1	1	1	NA	1	NA	8	8	NA	2	2	NA	12	12	NA	6.97592	6.97592	NA	TRUE	FALSE	TRUE	-0.063909665	25.52470014	-0.674928401	0.514183784	0.726550053	-6.03336577	0.741471744	1	1	FA_8_3_UV - FA_8_3_noUV	Huh7	limma	0.514183784	0.726550053	FALSE	no hit	6.97592
SSBP1	A0A0G2JLD8|C9K0U8|E7EUY5|Q04837	Single-stranded DNA-binding protein, mitochondrial (Fragment) OS=Homo sapiens GN=SSBP1 PE=1 SV=1|Single-stranded DNA-binding protein, mitochondrial OS=Homo sapiens GN=SSBP1 PE=1 SV=1	2	1	1	1	1	8	8	8	2	2	2	4	2	4	7.37287	7.80283	6.94291	TRUE	TRUE	TRUE	0.132290578	23.73694077	0.672540727	0.51564278	0.727303367	-6.034992102	0.7423538	1	1	FA_8_3_UV - FA_8_3_noUV	Huh7	limma	0.51564278	0.727303367	FALSE	no hit	7.80283
DNAJC13	O75165	DnaJ homolog subfamily C member 13 OS=Homo sapiens GN=DNAJC13 PE=1 SV=5	1	1	NA	1	NA	8	8	NA	2	2	NA	2	2	NA	5.85843	5.85843	NA	TRUE	FALSE	TRUE	0.123488556	21.84321165	0.671825233	0.516080465	0.727303367	-6.035478423	0.742618184	1	1	FA_8_3_UV - FA_8_3_noUV	Huh7	limma	0.516080465	0.727303367	FALSE	no hit	5.85843
CALML5	Q9NZT1	Calmodulin-like protein 5 OS=Homo sapiens GN=CALML5 PE=1 SV=2	2	1	1	1	1	8	8	8	2	2	2	3	2	3	6.736735	6.86648	6.60699	TRUE	TRUE	TRUE	0.791414076	22.53731655	0.670895535	0.516649513	0.727303367	-6.036109632	0.742961765	1	1	FA_8_3_UV - FA_8_3_noUV	Huh7	limma	0.516649513	0.727303367	FALSE	no hit	6.86648
CCT7	Q99832|Q99832-3	T-complex protein 1 subunit eta OS=Homo sapiens GN=CCT7 PE=1 SV=2|Isoform 3 of T-complex protein 1 subunit eta OS=Homo sapiens GN=CCT7	2	1	1	1	1	8	8	8	2	2	2	7	7	7	6.7112	7.08337	6.33903	TRUE	TRUE	TRUE	0.125159819	25.54938052	0.66695723	0.519064195	0.729792623	-6.038774624	0.744417778	1	1	FA_8_3_UV - FA_8_3_noUV	Huh7	limma	0.519064195	0.729792623	FALSE	no hit	7.08337
CAPZA2	P47755	F-actin-capping protein subunit alpha-2 OS=Homo sapiens GN=CAPZA2 PE=1 SV=3	1	1	NA	1	NA	8	8	NA	2	2	NA	5	5	NA	6.02415	6.02415	NA	TRUE	FALSE	TRUE	-0.089174093	23.80342891	-0.662398353	0.521867697	0.730090544	-6.041841585	0.746104361	1	1	FA_8_3_UV - FA_8_3_noUV	Huh7	limma	0.521867697	0.730090544	FALSE	no hit	6.02415
PPIL4	Q8WUA2	Peptidyl-prolyl cis-trans isomerase-like 4 OS=Homo sapiens GN=PPIL4 PE=1 SV=1	1	1	NA	1	NA	8	8	NA	2	2	NA	2	2	NA	6.52019	6.52019	NA	TRUE	FALSE	TRUE	0.098773363	24.02844147	0.660537404	0.523014658	0.730090544	-6.043087982	0.74679318	1	1	FA_8_3_UV - FA_8_3_noUV	Huh7	limma	0.523014658	0.730090544	FALSE	no hit	6.52019
PDHB	P11177|P11177-2|P11177-3	Pyruvate dehydrogenase E1 component subunit beta, mitochondrial OS=Homo sapiens GN=PDHB PE=1 SV=3|Isoform 2 of Pyruvate dehydrogenase E1 component subunit beta, mitochondrial OS=Homo sapiens GN=PDHB|Isoform 3 of Pyruvate dehydrogenase E1 component subunit beta, mitochondrial OS=Homo sapiens GN=PDHB	2	1	1	1	1	8	8	8	2	2	2	4	4	4	6.6696	7.11021	6.22899	TRUE	TRUE	TRUE	0.112401763	24.72181782	0.660311369	0.523154072	0.730090544	-6.043239153	0.74687686	1	1	FA_8_3_UV - FA_8_3_noUV	Huh7	limma	0.523154072	0.730090544	FALSE	no hit	7.11021
SDHB	A0A087WWT1|A0A087WXX8|P21912	Succinate dehydrogenase [ubiquinone] iron-sulfur subunit, mitochondrial (Fragment) OS=Homo sapiens GN=SDHB PE=1 SV=1|Succinate dehydrogenase [ubiquinone] iron-sulfur subunit, mitochondrial (Fragment) OS=Homo sapiens GN=SDHB PE=1 SV=1|Succinate dehydrogenase [ubiquinone] iron-sulfur subunit, mitochondrial OS=Homo sapiens GN=SDHB PE=1 SV=3	1	1	NA	1	NA	8	8	NA	2	2	NA	2	2	NA	6.40102	6.40102	NA	TRUE	FALSE	TRUE	0.168073271	22.62923655	0.660112039	0.523277032	0.730090544	-6.043372424	0.746950655	1	1	FA_8_3_UV - FA_8_3_noUV	Huh7	limma	0.523277032	0.730090544	FALSE	no hit	6.40102
EHMT1	Q9H9B1	Histone-lysine N-methyltransferase EHMT1 OS=Homo sapiens GN=EHMT1 PE=1 SV=4	1	1	NA	1	NA	8	8	NA	2	2	NA	3	3	NA	6.31982	6.31982	NA	TRUE	FALSE	TRUE	0.126199411	23.08116743	0.659703651	0.523529008	0.730090544	-6.043645356	0.747101855	1	1	FA_8_3_UV - FA_8_3_noUV	Huh7	limma	0.523529008	0.730090544	FALSE	no hit	6.31982
MCM5	P33992	DNA replication licensing factor MCM5 OS=Homo sapiens GN=MCM5 PE=1 SV=5	1	1	NA	1	NA	8	8	NA	2	2	NA	5	5	NA	6.4807	6.4807	NA	TRUE	FALSE	TRUE	-0.132402971	24.13862623	-0.65942781	0.523699242	0.730090544	-6.043829616	0.747203986	1	1	FA_8_3_UV - FA_8_3_noUV	Huh7	limma	0.523699242	0.730090544	FALSE	no hit	6.4807
VPS35	Q96QK1	Vacuolar protein sorting-associated protein 35 OS=Homo sapiens GN=VPS35 PE=1 SV=2	1	1	NA	1	NA	8	8	NA	2	2	NA	9	9	NA	6.91195	6.91195	NA	TRUE	FALSE	TRUE	0.090166638	25.39363187	0.659260064	0.523802782	0.730090544	-6.043941636	0.747266098	1	1	FA_8_3_UV - FA_8_3_noUV	Huh7	limma	0.523802782	0.730090544	FALSE	no hit	6.91195
DDX6	P26196	Probable ATP-dependent RNA helicase DDX6 OS=Homo sapiens GN=DDX6 PE=1 SV=2	1	1	NA	1	NA	8	8	NA	2	2	NA	7	7	NA	6.81091	6.81091	NA	TRUE	FALSE	TRUE	-0.076022088	25.03695521	-0.657962557	0.524604063	0.730305779	-6.044807213	0.747746579	1	1	FA_8_3_UV - FA_8_3_noUV	Huh7	limma	0.524604063	0.730305779	FALSE	no hit	6.81091
TGM2	P21980	Protein-glutamine gamma-glutamyltransferase 2 OS=Homo sapiens GN=TGM2 PE=1 SV=2	1	1	NA	1	NA	8	8	NA	2	2	NA	13	13	NA	7.24512	7.24512	NA	TRUE	FALSE	TRUE	-0.335770965	26.19292246	-0.652637605	0.527900038	0.73398359	-6.048343117	0.749719491	1	1	FA_8_3_UV - FA_8_3_noUV	Huh7	limma	0.527900038	0.73398359	FALSE	no hit	7.24512
KPNA3	O00505	Importin subunit alpha-4 OS=Homo sapiens GN=KPNA3 PE=1 SV=2	1	1	NA	1	NA	8	8	NA	2	2	NA	2	2	NA	6.29953	6.29953	NA	TRUE	FALSE	TRUE	-0.110064392	22.42915117	-0.649995151	0.529540119	0.73398359	-6.050087962	0.750699138	1	1	FA_8_3_UV - FA_8_3_noUV	Huh7	limma	0.529540119	0.73398359	FALSE	no hit	6.29953
UFD1L	C9IZG3|C9JNP9|Q92890|Q92890-1|Q92890-3	Ubiquitin fusion degradation protein 1 homolog (Fragment) OS=Homo sapiens GN=UFD1L PE=1 SV=1|Ubiquitin fusion degradation protein 1 homolog (Fragment) OS=Homo sapiens GN=UFD1L PE=1 SV=1|Ubiquitin fusion degradation protein 1 homolog OS=Homo sapiens GN=UFD1L PE=1 SV=3|Isoform Long of Ubiquitin fusion degradation protein 1 homolog OS=Homo sapiens GN=UFD1L|Isoform 3 of Ubiquitin fusion degradation p…	1	1	NA	1	NA	8	8	NA	2	2	NA	2	2	NA	6.24096	6.24096	NA	TRUE	FALSE	TRUE	-0.088995092	23.65342848	-0.648716177	0.530334999	0.73398359	-6.050930144	0.751173441	1	1	FA_8_3_UV - FA_8_3_noUV	Huh7	limma	0.530334999	0.73398359	FALSE	no hit	6.24096
BAT3|BAG6	A0A024RCR6|A0A0G2JJM1|A0A0G2JK23|A0A0G2JL47|F6S6P2|P46379|P46379-2|P46379-3|P46379-4|P46379-5|X6REW1	HLA-B associated transcript 3, isoform CRA_a OS=Homo sapiens GN=BAT3 PE=1 SV=1|Large proline-rich protein BAG6 (Fragment) OS=Homo sapiens GN=BAG6 PE=1 SV=3|Large proline-rich protein BAG6 OS=Homo sapiens GN=BAG6 PE=1 SV=1|Large proline-rich protein BAG6 OS=Homo sapiens GN=BAG6 PE=1 SV=1|Large proline-rich protein BAG6 (Fragment) OS=Homo sapiens GN=BAG6 PE=1 SV=1|Large proline-rich protein BAG6 OS…	1	1	NA	1	NA	8	8	NA	2	2	NA	2	2	NA	6.1578	6.1578	NA	TRUE	FALSE	TRUE	-0.089412395	23.26483696	-0.646506322	0.531710058	0.73398359	-6.052381695	0.75199318	1	1	FA_8_3_UV - FA_8_3_noUV	Huh7	limma	0.531710058	0.73398359	FALSE	no hit	6.1578
FAHD2A	Q96GK7	Fumarylacetoacetate hydrolase domain-containing protein 2A OS=Homo sapiens GN=FAHD2A PE=1 SV=1	1	1	NA	1	NA	8	8	NA	2	2	NA	6	6	NA	7.12079	7.12079	NA	TRUE	FALSE	TRUE	0.089614023	25.19749784	0.646301401	0.531837673	0.73398359	-6.052516067	0.752069209	1	1	FA_8_3_UV - FA_8_3_noUV	Huh7	limma	0.531837673	0.73398359	FALSE	no hit	7.12079
RPL7	A8MUD9|P18124	60S ribosomal protein L7 OS=Homo sapiens GN=RPL7 PE=1 SV=1|60S ribosomal protein L7 OS=Homo sapiens GN=RPL7 PE=1 SV=1	1	1	NA	1	NA	8	8	NA	2	2	NA	2	2	NA	6.32575	6.32575	NA	TRUE	FALSE	TRUE	-0.140289237	23.55888758	-0.645637332	0.532251346	0.73398359	-6.052951244	0.752315606	1	1	FA_8_3_UV - FA_8_3_noUV	Huh7	limma	0.532251346	0.73398359	FALSE	no hit	6.32575
RANBP2	P49792	E3 SUMO-protein ligase RanBP2 OS=Homo sapiens GN=RANBP2 PE=1 SV=2	2	1	1	1	1	8	8	8	2	2	2	8	8	8	6.338905	6.49242	6.18539	TRUE	TRUE	TRUE	0.104757669	24.97243731	0.645577111	0.532288868	0.73398359	-6.052990687	0.752337952	1	1	FA_8_3_UV - FA_8_3_noUV	Huh7	limma	0.532288868	0.73398359	FALSE	no hit	6.49242
COL4A3BP	Q9Y5P4|Q9Y5P4-2|Q9Y5P4-3	Collagen type IV alpha-3-binding protein OS=Homo sapiens GN=COL4A3BP PE=1 SV=1|Isoform 2 of Collagen type IV alpha-3-binding protein OS=Homo sapiens GN=COL4A3BP|Isoform 3 of Collagen type IV alpha-3-binding protein OS=Homo sapiens GN=COL4A3BP	1	1	NA	1	NA	8	8	NA	2	2	NA	2	2	NA	6.69583	6.69583	NA	TRUE	FALSE	TRUE	-0.081918918	23.71716999	-0.645323497	0.532446909	0.73398359	-6.053156762	0.752432061	1	1	FA_8_3_UV - FA_8_3_noUV	Huh7	limma	0.532446909	0.73398359	FALSE	no hit	6.69583
POGZ	Q7Z3K3|Q7Z3K3-2|Q7Z3K3-3|Q7Z3K3-5|Q7Z3K3-6|Q7Z3K3-7	Pogo transposable element with ZNF domain OS=Homo sapiens GN=POGZ PE=1 SV=2|Isoform 2 of Pogo transposable element with ZNF domain OS=Homo sapiens GN=POGZ|Isoform 3 of Pogo transposable element with ZNF domain OS=Homo sapiens GN=POGZ|Isoform 5 of Pogo transposable element with ZNF domain OS=Homo sapiens GN=POGZ|Isoform 6 of Pogo transposable element with ZNF domain OS=Homo sapiens GN=POGZ|Isoform…	1	1	NA	1	NA	8	8	NA	2	2	NA	3	3	NA	6.50517	6.50517	NA	TRUE	FALSE	TRUE	0.138643413	24.10806102	0.6440289	0.533254069	0.734199809	-6.054003571	0.752912505	1	1	FA_8_3_UV - FA_8_3_noUV	Huh7	limma	0.533254069	0.734199809	FALSE	no hit	6.50517
LAP3	P28838|P28838-2	Cytosol aminopeptidase OS=Homo sapiens GN=LAP3 PE=1 SV=3|Isoform 2 of Cytosol aminopeptidase OS=Homo sapiens GN=LAP3	2	1	1	1	1	8	8	8	2	2	2	8	4	8	6.50077	6.36483	6.63671	TRUE	TRUE	TRUE	-0.076172631	23.94431067	-0.640598613	0.535396222	0.736251321	-6.056239774	0.754185999	1	1	FA_8_3_UV - FA_8_3_noUV	Huh7	limma	0.535396222	0.736251321	FALSE	no hit	6.36483
GGH	Q92820	Gamma-glutamyl hydrolase OS=Homo sapiens GN=GGH PE=1 SV=2	2	1	1	1	1	8	8	8	2	2	2	3	2	3	6.118725	6.37022	5.86723	TRUE	TRUE	TRUE	0.158325384	22.99111013	0.634940155	0.538940672	0.740223868	-6.059904428	0.756288162	1	1	FA_8_3_UV - FA_8_3_noUV	Huh7	limma	0.538940672	0.740223868	FALSE	no hit	6.37022
GNPDA1	P46926|P46926-2	Glucosamine-6-phosphate isomerase 1 OS=Homo sapiens GN=GNPDA1 PE=1 SV=1|Isoform 2 of Glucosamine-6-phosphate isomerase 1 OS=Homo sapiens GN=GNPDA1	1	1	NA	1	NA	8	8	NA	2	2	NA	2	2	NA	6.1382	6.1382	NA	TRUE	FALSE	TRUE	-0.157877955	23.17070623	-0.632758513	0.540310846	0.740971105	-6.061309327	0.757099142	1	1	FA_8_3_UV - FA_8_3_noUV	Huh7	limma	0.540310846	0.740971105	FALSE	no hit	6.1382
GLB1	P16278|P16278-3	Beta-galactosidase OS=Homo sapiens GN=GLB1 PE=1 SV=2|Isoform 3 of Beta-galactosidase OS=Homo sapiens GN=GLB1	2	1	1	1	1	8	8	8	2	2	2	7	7	3	6.37075	6.94838	5.79312	TRUE	TRUE	TRUE	0.064416125	24.99454951	0.631984673	0.540797334	0.740971105	-6.061806579	0.757386865	1	1	FA_8_3_UV - FA_8_3_noUV	Huh7	limma	0.540797334	0.740971105	FALSE	no hit	6.94838
CBX5	P45973	Chromobox protein homolog 5 OS=Homo sapiens GN=CBX5 PE=1 SV=1	2	1	1	1	1	8	8	8	2	2	2	4	3	4	6.92429	6.82231	7.02627	TRUE	TRUE	TRUE	0.156660366	24.55199056	0.629452159	0.542391196	0.742254134	-6.063429977	0.758328721	1	1	FA_8_3_UV - FA_8_3_noUV	Huh7	limma	0.542391196	0.742254134	FALSE	no hit	6.82231
PNPT1	Q8TCS8	Polyribonucleotide nucleotidyltransferase 1, mitochondrial OS=Homo sapiens GN=PNPT1 PE=1 SV=2	1	1	NA	1	NA	8	8	NA	2	2	NA	4	4	NA	6.30719	6.30719	NA	TRUE	FALSE	TRUE	0.098824996	24.19370762	0.628073657	0.543259897	0.742542886	-6.064311093	0.758841543	1	1	FA_8_3_UV - FA_8_3_noUV	Huh7	limma	0.543259897	0.742542886	FALSE	no hit	6.30719
VCL	P18206|P18206-2	Vinculin OS=Homo sapiens GN=VCL PE=1 SV=4|Isoform 1 of Vinculin OS=Homo sapiens GN=VCL	2	1	1	1	1	8	8	8	2	2	2	24	24	6	6.80942	7.31727	6.30157	TRUE	TRUE	TRUE	-0.096514098	27.41213145	-0.625561978	0.544844742	0.743808601	-6.065911919	0.759776197	1	1	FA_8_3_UV - FA_8_3_noUV	Huh7	limma	0.544844742	0.743808601	FALSE	no hit	7.31727
BLVRB	P30043	Flavin reductase (NADPH) OS=Homo sapiens GN=BLVRB PE=1 SV=3	1	1	NA	1	NA	8	8	NA	2	2	NA	2	2	NA	6.43839	6.43839	NA	TRUE	FALSE	TRUE	-0.091618392	22.39941358	-0.624189423	0.545711922	0.744092706	-6.066784211	0.760287106	1	1	FA_8_3_UV - FA_8_3_noUV	Huh7	limma	0.545711922	0.744092706	FALSE	no hit	6.43839
SNRNP70	P08621|P08621-2	U1 small nuclear ribonucleoprotein 70 kDa OS=Homo sapiens GN=SNRNP70 PE=1 SV=2|Isoform 2 of U1 small nuclear ribonucleoprotein 70 kDa OS=Homo sapiens GN=SNRNP70	2	1	1	1	1	8	8	8	2	2	2	5	4	5	6.96542	7.2787	6.65214	TRUE	TRUE	TRUE	0.111019397	24.96724712	0.621198525	0.547604288	0.744825281	-6.068678848	0.761400773	1	1	FA_8_3_UV - FA_8_3_noUV	Huh7	limma	0.547604288	0.744825281	FALSE	no hit	7.2787
2-Sep	B5MCX3|C9J2Q4|Q15019|Q15019-2	Septin-2 OS=Homo sapiens GN=SEPT2 PE=1 SV=1|Septin-2 (Fragment) OS=Homo sapiens GN=SEPT2 PE=1 SV=1|Septin-2 OS=Homo sapiens GN=SEPT2 PE=1 SV=1|Isoform 2 of Septin-2 OS=Homo sapiens GN=SEPT2	1	1	NA	1	NA	8	8	NA	2	2	NA	3	3	NA	6.48128	6.48128	NA	TRUE	FALSE	TRUE	-0.063815864	23.74692804	-0.62087911	0.547806605	0.744825281	-6.068880688	0.761519738	1	1	FA_8_3_UV - FA_8_3_noUV	Huh7	limma	0.547806605	0.744825281	FALSE	no hit	6.48128
MCM2	H0Y8E6|P49736	DNA helicase (Fragment) OS=Homo sapiens GN=MCM2 PE=1 SV=1|DNA replication licensing factor MCM2 OS=Homo sapiens GN=MCM2 PE=1 SV=4	1	1	NA	1	NA	8	8	NA	2	2	NA	13	13	NA	6.96401	6.96401	NA	TRUE	FALSE	TRUE	-0.141587096	26.14015934	-0.620213476	0.548228351	0.744825281	-6.069300998	0.761767667	1	1	FA_8_3_UV - FA_8_3_noUV	Huh7	limma	0.548228351	0.744825281	FALSE	no hit	6.96401
MCM4	P33991	DNA replication licensing factor MCM4 OS=Homo sapiens GN=MCM4 PE=1 SV=5	1	1	NA	1	NA	8	8	NA	2	2	NA	11	11	NA	6.94079	6.94079	NA	TRUE	FALSE	TRUE	-0.131767651	25.77458993	-0.61910988	0.548927996	0.744879456	-6.069996933	0.762178778	1	1	FA_8_3_UV - FA_8_3_noUV	Huh7	limma	0.548927996	0.744879456	FALSE	no hit	6.94079
WDR61	H0YMF9|H0YN81|Q9GZS3	WD repeat-containing protein 61 OS=Homo sapiens GN=WDR61 PE=1 SV=1|WD repeat-containing protein 61 (Fragment) OS=Homo sapiens GN=WDR61 PE=1 SV=1|WD repeat-containing protein 61 OS=Homo sapiens GN=WDR61 PE=1 SV=1	1	1	NA	1	NA	8	8	NA	2	2	NA	2	2	NA	5.9633	5.9633	NA	TRUE	FALSE	TRUE	-0.08691736	23.31756537	-0.610790424	0.554218488	0.750499334	-6.075206207	0.765280095	1	1	FA_8_3_UV - FA_8_3_noUV	Huh7	limma	0.554218488	0.750499334	FALSE	no hit	5.9633
RELN	J3KQ66|P78509|P78509-2|P78509-3	Reelin OS=Homo sapiens GN=RELN PE=1 SV=1|Reelin OS=Homo sapiens GN=RELN PE=1 SV=3|Isoform 2 of Reelin OS=Homo sapiens GN=RELN|Isoform 3 of Reelin OS=Homo sapiens GN=RELN	1	1	NA	1	NA	8	8	NA	2	2	NA	2	2	NA	5.78458	5.78458	NA	TRUE	FALSE	TRUE	0.222063592	22.31242134	0.610507391	0.554398976	0.750499334	-6.075382278	0.76538567	1	1	FA_8_3_UV - FA_8_3_noUV	Huh7	limma	0.554398976	0.750499334	FALSE	no hit	5.78458
NAGA	P17050	Alpha-N-acetylgalactosaminidase OS=Homo sapiens GN=NAGA PE=1 SV=2	2	1	1	1	1	8	8	8	2	2	2	5	2	5	6.762655	6.34592	7.17939	TRUE	TRUE	TRUE	0.057218687	23.33394966	0.60507438	0.557869952	0.753930115	-6.078747369	0.767413101	1	1	FA_8_3_UV - FA_8_3_noUV	Huh7	limma	0.557869952	0.753930115	FALSE	no hit	6.34592
TJP1	A0A087X0K9|G3V1L9|G5E9E7|Q07157|Q07157-2	Tight junction protein ZO-1 OS=Homo sapiens GN=TJP1 PE=1 SV=1|Tight junction protein 1 (Zona occludens 1), isoform CRA_a OS=Homo sapiens GN=TJP1 PE=1 SV=1|Tight junction protein 1 (Zona occludens 1), isoform CRA_e OS=Homo sapiens GN=TJP1 PE=1 SV=1|Tight junction protein ZO-1 OS=Homo sapiens GN=TJP1 PE=1 SV=3|Isoform Short of Tight junction protein ZO-1 OS=Homo sapiens GN=TJP1	1	1	NA	1	NA	8	8	NA	2	2	NA	2	2	NA	6.48244	6.48244	NA	TRUE	FALSE	TRUE	0.087133909	23.21905228	0.604003993	0.558555215	0.753930115	-6.079407043	0.767812724	1	1	FA_8_3_UV - FA_8_3_noUV	Huh7	limma	0.558555215	0.753930115	FALSE	no hit	6.48244
SNRPA	M0R268|P09012	U1 small nuclear ribonucleoprotein A (Fragment) OS=Homo sapiens GN=SNRPA PE=1 SV=1|U1 small nuclear ribonucleoprotein A OS=Homo sapiens GN=SNRPA PE=1 SV=3	2	1	1	1	1	8	8	8	2	2	2	4	3	4	6.637405	6.53306	6.74175	TRUE	TRUE	TRUE	0.142199901	24.301943	0.603408467	0.558936675	0.753930115	-6.079773592	0.768035087	1	1	FA_8_3_UV - FA_8_3_noUV	Huh7	limma	0.558936675	0.753930115	FALSE	no hit	6.53306
ANK2	E9PCH6|H0Y931|I6L894|Q01484|Q01484-2|Q01484-5|Q01484-7	Ankyrin-2 OS=Homo sapiens GN=ANK2 PE=1 SV=1|Ankyrin-2 (Fragment) OS=Homo sapiens GN=ANK2 PE=1 SV=1|Ankyrin-2 OS=Homo sapiens GN=ANK2 PE=1 SV=1|Ankyrin-2 OS=Homo sapiens GN=ANK2 PE=1 SV=4|Isoform 2 of Ankyrin-2 OS=Homo sapiens GN=ANK2|Isoform 4 of Ankyrin-2 OS=Homo sapiens GN=ANK2|Isoform 5 of Ankyrin-2 OS=Homo sapiens GN=ANK2	1	1	NA	1	NA	8	8	NA	2	2	NA	2	2	NA	6.35352	6.35352	NA	TRUE	FALSE	TRUE	-0.177345257	23.05870272	-0.601395423	0.560227188	0.754769088	-6.081010136	0.768786878	1	1	FA_8_3_UV - FA_8_3_noUV	Huh7	limma	0.560227188	0.754769088	FALSE	no hit	6.35352
NCBP1	Q09161	Nuclear cap-binding protein subunit 1 OS=Homo sapiens GN=NCBP1 PE=1 SV=1	2	1	1	1	1	8	8	8	2	2	2	7	7	2	6.314155	6.73437	5.89394	TRUE	TRUE	TRUE	0.111215327	25.3318594	0.592068006	0.566228313	0.761944893	-6.086689364	0.772273121	1	1	FA_8_3_UV - FA_8_3_noUV	Huh7	limma	0.566228313	0.761944893	FALSE	no hit	6.73437
UQCRC2	H3BRG4|P22695	Cytochrome b-c1 complex subunit 2, mitochondrial OS=Homo sapiens GN=UQCRC2 PE=1 SV=1|Cytochrome b-c1 complex subunit 2, mitochondrial OS=Homo sapiens GN=UQCRC2 PE=1 SV=3	1	1	NA	1	NA	8	8	NA	2	2	NA	4	4	NA	6.57468	6.57468	NA	TRUE	FALSE	TRUE	0.090292654	24.22298813	0.590151096	0.567465997	0.762701322	-6.087846259	0.772990164	1	1	FA_8_3_UV - FA_8_3_noUV	Huh7	limma	0.567465997	0.762701322	FALSE	no hit	6.57468
CAPRIN1	A0A087X082|E9PLA9|Q14444|Q14444-2	Caprin-1 OS=Homo sapiens GN=CAPRIN1 PE=1 SV=1|Caprin-1 (Fragment) OS=Homo sapiens GN=CAPRIN1 PE=1 SV=1|Caprin-1 OS=Homo sapiens GN=CAPRIN1 PE=1 SV=2|Isoform 2 of Caprin-1 OS=Homo sapiens GN=CAPRIN1	2	1	1	1	1	8	8	8	2	2	2	4	4	4	6.725585	6.901	6.55017	TRUE	TRUE	TRUE	-0.093740476	25.58395628	-0.586768766	0.569653472	0.764631992	-6.089879016	0.774255836	1	1	FA_8_3_UV - FA_8_3_noUV	Huh7	limma	0.569653472	0.764631992	FALSE	no hit	6.901
TRIP12	Q14669|Q14669-2|Q14669-3|Q14669-4	E3 ubiquitin-protein ligase TRIP12 OS=Homo sapiens GN=TRIP12 PE=1 SV=1|Isoform 2 of E3 ubiquitin-protein ligase TRIP12 OS=Homo sapiens GN=TRIP12|Isoform 3 of E3 ubiquitin-protein ligase TRIP12 OS=Homo sapiens GN=TRIP12|Isoform 4 of E3 ubiquitin-protein ligase TRIP12 OS=Homo sapiens GN=TRIP12	1	1	NA	1	NA	8	8	NA	2	2	NA	5	5	NA	6.41595	6.41595	NA	TRUE	FALSE	TRUE	0.124208637	23.65309976	0.585836849	0.570256986	0.764631992	-6.090437173	0.774604666	1	1	FA_8_3_UV - FA_8_3_noUV	Huh7	limma	0.570256986	0.764631992	FALSE	no hit	6.41595
HKDC1	Q2TB90	Putative hexokinase HKDC1 OS=Homo sapiens GN=HKDC1 PE=1 SV=3	1	1	NA	1	NA	8	8	NA	2	2	NA	12	12	NA	7.57556	7.57556	NA	TRUE	FALSE	TRUE	0.163168674	26.27013313	0.583625176	0.571690676	0.764852337	-6.091758499	0.77543271	1	1	FA_8_3_UV - FA_8_3_noUV	Huh7	limma	0.571690676	0.764852337	FALSE	no hit	7.57556
GFPT1	Q06210|Q06210-2	Glutamine--fructose-6-phosphate aminotransferase [isomerizing] 1 OS=Homo sapiens GN=GFPT1 PE=1 SV=3|Isoform 2 of Glutamine--fructose-6-phosphate aminotransferase [isomerizing] 1 OS=Homo sapiens GN=GFPT1	1	1	NA	1	NA	8	8	NA	2	2	NA	2	2	NA	5.65303	5.65303	NA	TRUE	FALSE	TRUE	-0.104918483	21.84716162	-0.58349328	0.571776238	0.764852337	-6.09183715	0.775482099	1	1	FA_8_3_UV - FA_8_3_noUV	Huh7	limma	0.571776238	0.764852337	FALSE	no hit	5.65303
POLR2G	P62487	DNA-directed RNA polymerase II subunit RPB7 OS=Homo sapiens GN=POLR2G PE=1 SV=1	1	1	NA	1	NA	8	8	NA	2	2	NA	3	3	NA	5.91936	5.91936	NA	TRUE	FALSE	TRUE	0.087138775	23.60865804	0.57958646	0.574313786	0.765569921	-6.094159292	0.776945451	1	1	FA_8_3_UV - FA_8_3_noUV	Huh7	limma	0.574313786	0.765569921	FALSE	no hit	5.91936
DYNC1H1	Q14204	Cytoplasmic dynein 1 heavy chain 1 OS=Homo sapiens GN=DYNC1H1 PE=1 SV=5	1	1	NA	1	NA	8	8	NA	2	2	NA	19	19	NA	6.97197	6.97197	NA	TRUE	FALSE	TRUE	-0.067019451	26.63970633	-0.578877933	0.574774641	0.765569921	-6.094578863	0.777210924	1	1	FA_8_3_UV - FA_8_3_noUV	Huh7	limma	0.574774641	0.765569921	FALSE	no hit	6.97197
CNP	P09543|P09543-2	2',3'-cyclic-nucleotide 3'-phosphodiesterase OS=Homo sapiens GN=CNP PE=1 SV=2|Isoform CNPI of 2',3'-cyclic-nucleotide 3'-phosphodiesterase OS=Homo sapiens GN=CNP	1	1	NA	1	NA	8	8	NA	2	2	NA	4	4	NA	6.85038	6.85038	NA	TRUE	FALSE	TRUE	0.098577663	24.09638928	0.578509313	0.575014486	0.765569921	-6.09479696	0.77734905	1	1	FA_8_3_UV - FA_8_3_noUV	Huh7	limma	0.575014486	0.765569921	FALSE	no hit	6.85038
HNRNPR	B4DT28|O43390|O43390-3	Heterogeneous nuclear ribonucleoprotein R OS=Homo sapiens GN=HNRNPR PE=1 SV=1|Isoform 3 of Heterogeneous nuclear ribonucleoprotein R OS=Homo sapiens GN=HNRNPR	2	1	1	1	1	8	8	8	2	2	2	9	9	6	6.72483	7.1069	6.34276	TRUE	TRUE	TRUE	0.141871235	25.39766612	0.576837395	0.576103011	0.765569921	-6.09578453	0.777975625	1	1	FA_8_3_UV - FA_8_3_noUV	Huh7	limma	0.576103011	0.765569921	FALSE	no hit	7.1069
FTCD	O95954	Formimidoyltransferase-cyclodeaminase OS=Homo sapiens GN=FTCD PE=1 SV=2	1	1	NA	1	NA	8	8	NA	2	2	NA	4	4	NA	5.94989	5.94989	NA	TRUE	FALSE	TRUE	0.099910953	23.29061864	0.576396926	0.57638997	0.765569921	-6.096044261	0.778140721	1	1	FA_8_3_UV - FA_8_3_noUV	Huh7	limma	0.57638997	0.765569921	FALSE	no hit	5.94989
PUF60	A0A0J9YVP6|A0A0J9YXJ8|A0A0J9YXX5|A0A0J9YYL3|Q9UHX1|Q9UHX1-2|Q9UHX1-3|Q9UHX1-4|Q9UHX1-5|Q9UHX1-6	Poly(U)-binding-splicing factor PUF60 (Fragment) OS=Homo sapiens GN=PUF60 PE=1 SV=1|Poly(U)-binding-splicing factor PUF60 (Fragment) OS=Homo sapiens GN=PUF60 PE=1 SV=1|Poly(U)-binding-splicing factor PUF60 (Fragment) OS=Homo sapiens GN=PUF60 PE=1 SV=1|Poly(U)-binding-splicing factor PUF60 (Fragment) OS=Homo sapiens GN=PUF60 PE=1 SV=1|Poly(U)-binding-splicing factor PUF60 OS=Homo sapiens GN=PUF60 …	2	1	1	1	1	8	8	8	2	2	2	7	7	6	7.068145	7.33249	6.8038	TRUE	TRUE	TRUE	-0.057546119	25.35996268	-0.576325372	0.576436594	0.765569921	-6.096086436	0.778167542	1	1	FA_8_3_UV - FA_8_3_noUV	Huh7	limma	0.576436594	0.765569921	FALSE	no hit	7.33249
ACTN4	O43707	Alpha-actinin-4 OS=Homo sapiens GN=ACTN4 PE=1 SV=2	2	1	1	1	1	8	8	8	2	2	2	28	28	17	7.56401	8.03003	7.09799	TRUE	TRUE	TRUE	0.05992499	27.48339493	0.575369924	0.577059347	0.765569921	-6.09664913	0.778525699	1	1	FA_8_3_UV - FA_8_3_noUV	Huh7	limma	0.577059347	0.765569921	FALSE	no hit	8.03003
COPS4	D6RAX7|Q9BT78|Q9BT78-2	COP9 constitutive photomorphogenic-like protein subunit 4 isoform 2 OS=Homo sapiens GN=COPS4 PE=1 SV=1|COP9 signalosome complex subunit 4 OS=Homo sapiens GN=COPS4 PE=1 SV=1|Isoform 2 of COP9 signalosome complex subunit 4 OS=Homo sapiens GN=COPS4	1	1	NA	1	NA	8	8	NA	2	2	NA	3	3	NA	6.15179	6.15179	NA	TRUE	FALSE	TRUE	-0.117503865	22.84800008	-0.57036043	0.580330433	0.767528721	-6.099585053	0.780404318	1	1	FA_8_3_UV - FA_8_3_noUV	Huh7	limma	0.580330433	0.767528721	FALSE	no hit	6.15179
HDAC1	Q13547	Histone deacetylase 1 OS=Homo sapiens GN=HDAC1 PE=1 SV=1	1	1	NA	1	NA	8	8	NA	2	2	NA	2	2	NA	6.89823	6.89823	NA	TRUE	FALSE	TRUE	0.104871342	23.80363008	0.569462537	0.580917788	0.767528721	-6.100108737	0.780741174	1	1	FA_8_3_UV - FA_8_3_noUV	Huh7	limma	0.580917788	0.767528721	FALSE	no hit	6.89823
HYOU1	Q9Y4L1	Hypoxia up-regulated protein 1 OS=Homo sapiens GN=HYOU1 PE=1 SV=1	2	1	1	1	1	8	8	8	2	2	2	12	7	12	6.895925	7.0548	6.73705	TRUE	TRUE	TRUE	0.081182966	25.26850883	0.569118607	0.581142854	0.767528721	-6.100309124	0.780870215	1	1	FA_8_3_UV - FA_8_3_noUV	Huh7	limma	0.581142854	0.767528721	FALSE	no hit	7.0548
TFRC	G3V0E5|P02786	Transferrin receptor (P90, CD71), isoform CRA_c OS=Homo sapiens GN=TFRC PE=1 SV=1|Transferrin receptor protein 1 OS=Homo sapiens GN=TFRC PE=1 SV=2	1	1	NA	1	NA	8	8	NA	2	2	NA	3	3	NA	6.16373	6.16373	NA	TRUE	FALSE	TRUE	-0.089172529	24.04391755	-0.568201276	0.58174338	0.767528721	-6.100843043	0.781214422	1	1	FA_8_3_UV - FA_8_3_noUV	Huh7	limma	0.58174338	0.767528721	FALSE	no hit	6.16373
hCG_2039566|A0A0U1RRH7|HIST1H2AB|HIST1H2AG|HIST1H2AD|HIST2H2AC|HIST2H2AA3|HIST3H2A|HIST1H2AC|HIST1H2AH|HIST1H2AJ|H2AFJ	A0A0U1RR32|A0A0U1RRH7|P04908|P0C0S8|P20671|Q16777|Q6FI13|Q7L7L0|Q93077|Q96KK5|Q99878|Q9BTM1	Histone H2A OS=Homo sapiens GN=hCG_2039566 PE=3 SV=1|Histone H2A OS=Homo sapiens PE=3 SV=1|Histone H2A type 1-B/E OS=Homo sapiens GN=HIST1H2AB PE=1 SV=2|Histone H2A type 1 OS=Homo sapiens GN=HIST1H2AG PE=1 SV=2|Histone H2A type 1-D OS=Homo sapiens GN=HIST1H2AD PE=1 SV=2|Histone H2A type 2-C OS=Homo sapiens GN=HIST2H2AC PE=1 SV=4|Histone H2A type 2-A OS=Homo sapiens GN=HIST2H2AA3 PE=1 SV=3|Histone…	1	1	NA	1	NA	8	8	NA	2	2	NA	4	4	NA	7.91898	7.91898	NA	TRUE	FALSE	TRUE	0.091924833	24.64457084	0.566963845	0.582553983	0.767528721	-6.10156199	0.781678808	1	1	FA_8_3_UV - FA_8_3_noUV	Huh7	limma	0.582553983	0.767528721	FALSE	no hit	7.91898
TNPO1	Q92973|Q92973-2|Q92973-3	Isoform 2 of Transportin-1 OS=Homo sapiens GN=TNPO1|Isoform 3 of Transportin-1 OS=Homo sapiens GN=TNPO1|Transportin-1 OS=Homo sapiens GN=TNPO1 PE=1 SV=2	2	1	1	1	1	8	8	8	2	2	2	10	10	2	6.776785	7.5908	5.96277	TRUE	TRUE	TRUE	-0.080734274	26.01409648	-0.566871035	0.582614804	0.767528721	-6.101615854	0.781713641	1	1	FA_8_3_UV - FA_8_3_noUV	Huh7	limma	0.582614804	0.767528721	FALSE	no hit	7.5908
CBX3	Q13185	Chromobox protein homolog 3 OS=Homo sapiens GN=CBX3 PE=1 SV=4	2	1	1	1	1	8	8	8	2	2	2	6	3	6	6.598425	6.67422	6.52263	TRUE	TRUE	TRUE	0.181902694	24.47506846	0.565802867	0.583315054	0.76755559	-6.10223518	0.782114573	1	1	FA_8_3_UV - FA_8_3_noUV	Huh7	limma	0.583315054	0.76755559	FALSE	no hit	6.67422
SUCLG1	P53597	Succinyl-CoA ligase [ADP/GDP-forming] subunit alpha, mitochondrial OS=Homo sapiens GN=SUCLG1 PE=1 SV=4	1	1	NA	1	NA	8	8	NA	2	2	NA	2	2	NA	6.61259	6.61259	NA	TRUE	FALSE	TRUE	0.064557753	23.56254255	0.564286406	0.584309959	0.767969667	-6.103112543	0.782683868	1	1	FA_8_3_UV - FA_8_3_noUV	Huh7	limma	0.584309959	0.767969667	FALSE	no hit	6.61259
HLA-C	A0A140T912|A0A140T930|A0A140T937|A0A140T9M5|P30504|P30508|P30510|Q95604	HLA class I histocompatibility antigen, Cw-6 alpha chain OS=Homo sapiens GN=HLA-C PE=1 SV=1|HLA class I histocompatibility antigen, Cw-6 alpha chain OS=Homo sapiens GN=HLA-C PE=1 SV=1|HLA class I histocompatibility antigen, Cw-6 alpha chain OS=Homo sapiens GN=HLA-C PE=1 SV=1|HLA class I histocompatibility antigen, Cw-6 alpha chain (Fragment) OS=Homo sapiens GN=HLA-C PE=1 SV=1|HLA class I histocom…	1	1	NA	1	NA	8	8	NA	2	2	NA	3	3	NA	6.55997	6.55997	NA	TRUE	FALSE	TRUE	-0.085024215	23.57709682	-0.562841908	0.585258493	0.768321906	-6.103946214	0.783226256	1	1	FA_8_3_UV - FA_8_3_noUV	Huh7	limma	0.585258493	0.768321906	FALSE	no hit	6.55997
DRG1	Q9Y295	Developmentally-regulated GTP-binding protein 1 OS=Homo sapiens GN=DRG1 PE=1 SV=1	1	1	NA	1	NA	8	8	NA	2	2	NA	2	2	NA	5.8179	5.8179	NA	TRUE	FALSE	TRUE	-0.068810708	22.57560785	-0.558304991	0.588242999	0.770655876	-6.106551565	0.784930487	1	1	FA_8_3_UV - FA_8_3_noUV	Huh7	limma	0.588242999	0.770655876	FALSE	no hit	5.8179
TSN	E9PGT1|Q15631	Translin OS=Homo sapiens GN=TSN PE=1 SV=1|Translin OS=Homo sapiens GN=TSN PE=1 SV=1	2	1	1	1	1	8	8	8	2	2	2	5	4	5	6.79026	6.95522	6.6253	TRUE	TRUE	TRUE	-0.083690479	24.11027704	-0.558064291	0.588401563	0.770655876	-6.106689235	0.785020932	1	1	FA_8_3_UV - FA_8_3_noUV	Huh7	limma	0.588401563	0.770655876	FALSE	no hit	6.95522
PLRG1	O43660|O43660-2	Pleiotropic regulator 1 OS=Homo sapiens GN=PLRG1 PE=1 SV=1|Isoform 2 of Pleiotropic regulator 1 OS=Homo sapiens GN=PLRG1	1	1	NA	1	NA	8	8	NA	2	2	NA	2	2	NA	6.14378	6.14378	NA	TRUE	FALSE	TRUE	-0.104896438	22.2539114	-0.556486625	0.58944143	0.771123261	-6.107590204	0.785613822	1	1	FA_8_3_UV - FA_8_3_noUV	Huh7	limma	0.58944143	0.771123261	FALSE	no hit	6.14378
RPL4	H3BM89|P36578	60S ribosomal protein L4 OS=Homo sapiens GN=RPL4 PE=1 SV=1|60S ribosomal protein L4 OS=Homo sapiens GN=RPL4 PE=1 SV=5	2	1	1	1	1	8	8	8	2	2	2	5	3	5	6.244925	6.21069	6.27916	TRUE	TRUE	TRUE	-0.115347821	22.4992695	-0.55363305	0.591324737	0.771826153	-6.109213718	0.786686516	1	1	FA_8_3_UV - FA_8_3_noUV	Huh7	limma	0.591324737	0.771826153	FALSE	no hit	6.21069
CCT8	P50990|P50990-2	T-complex protein 1 subunit theta OS=Homo sapiens GN=CCT8 PE=1 SV=4|Isoform 2 of T-complex protein 1 subunit theta OS=Homo sapiens GN=CCT8	2	1	1	1	1	8	8	8	2	2	2	19	19	13	7.58369	8.0767	7.09068	TRUE	TRUE	TRUE	-0.071589096	27.21219158	-0.553600875	0.59134599	0.771826153	-6.109231978	0.786698614	1	1	FA_8_3_UV - FA_8_3_noUV	Huh7	limma	0.59134599	0.771826153	FALSE	no hit	8.0767
RRAS2	A0A0C4DGH2|P62070|P62070-4	Ras-related protein R-Ras2 OS=Homo sapiens GN=RRAS2 PE=1 SV=1|Ras-related protein R-Ras2 OS=Homo sapiens GN=RRAS2 PE=1 SV=1|Isoform 4 of Ras-related protein R-Ras2 OS=Homo sapiens GN=RRAS2	1	1	NA	1	NA	8	8	NA	2	2	NA	2	2	NA	6.76939	6.76939	NA	TRUE	FALSE	TRUE	0.103658271	24.33893343	0.54974147	0.593898211	0.774262218	-6.111415122	0.788150063	1	1	FA_8_3_UV - FA_8_3_noUV	Huh7	limma	0.593898211	0.774262218	FALSE	no hit	6.76939
LSM7	Q9UK45	U6 snRNA-associated Sm-like protein LSm7 OS=Homo sapiens GN=LSM7 PE=1 SV=1	2	1	1	1	1	8	8	8	2	2	2	3	2	3	6.55606	6.8109	6.30122	TRUE	TRUE	TRUE	0.068885882	24.15985501	0.540876092	0.59978268	0.781031887	-6.116375435	0.791486942	1	1	FA_8_3_UV - FA_8_3_noUV	Huh7	limma	0.59978268	0.781031887	FALSE	no hit	6.8109
FHL2	A0A0A0MSG2|J3KNW4|Q14192	Four and a half LIM domains protein 2 OS=Homo sapiens GN=FHL2 PE=1 SV=1|Four and a half LIM domains protein 2 OS=Homo sapiens GN=FHL2 PE=1 SV=1|Four and a half LIM domains protein 2 OS=Homo sapiens GN=FHL2 PE=1 SV=3	1	1	NA	1	NA	8	8	NA	2	2	NA	5	5	NA	6.93835	6.93835	NA	TRUE	FALSE	TRUE	-0.088017518	24.90066073	-0.536700046	0.602565023	0.78375105	-6.118685613	0.793060111	1	1	FA_8_3_UV - FA_8_3_noUV	Huh7	limma	0.602565023	0.78375105	FALSE	no hit	6.93835
NQO1	B4DLR8|P15559|P15559-2|P15559-3	NAD(P)H dehydrogenase [quinone] 1 OS=Homo sapiens GN=NQO1 PE=1 SV=1|NAD(P)H dehydrogenase [quinone] 1 OS=Homo sapiens GN=NQO1 PE=1 SV=1|Isoform 2 of NAD(P)H dehydrogenase [quinone] 1 OS=Homo sapiens GN=NQO1|Isoform 3 of NAD(P)H dehydrogenase [quinone] 1 OS=Homo sapiens GN=NQO1	1	1	NA	1	NA	8	8	NA	2	2	NA	2	2	NA	6.55812	6.55812	NA	TRUE	FALSE	TRUE	-0.203144856	22.54004978	-0.533125781	0.604951706	0.785936817	-6.120649444	0.794407252	1	1	FA_8_3_UV - FA_8_3_noUV	Huh7	limma	0.604951706	0.785936817	FALSE	no hit	6.55812
FXN	C9JAX1|H7C585|Q16595	Frataxin, mitochondrial OS=Homo sapiens GN=FXN PE=1 SV=1|Frataxin, mitochondrial (Fragment) OS=Homo sapiens GN=FXN PE=1 SV=1|Frataxin, mitochondrial OS=Homo sapiens GN=FXN PE=1 SV=2	1	1	NA	1	NA	8	8	NA	2	2	NA	3	3	NA	6.24594	6.24594	NA	TRUE	FALSE	TRUE	-0.079704992	24.06723039	-0.531692409	0.605910191	0.785936817	-6.121433503	0.794947662	1	1	FA_8_3_UV - FA_8_3_noUV	Huh7	limma	0.605910191	0.785936817	FALSE	no hit	6.24594
LMNA	P02545|P02545-2|P02545-3|P02545-6	Isoform 6 of Prelamin-A/C OS=Homo sapiens GN=LMNA|Isoform ADelta10 of Prelamin-A/C OS=Homo sapiens GN=LMNA|Isoform C of Prelamin-A/C OS=Homo sapiens GN=LMNA|Prelamin-A/C OS=Homo sapiens GN=LMNA PE=1 SV=1	2	1	1	1	1	8	8	8	2	2	2	32	21	32	7.669625	7.64305	7.6962	TRUE	TRUE	TRUE	0.082726915	27.10057535	0.53105915	0.606333895	0.785936817	-6.121779263	0.795186445	1	1	FA_8_3_UV - FA_8_3_noUV	Huh7	limma	0.606333895	0.785936817	FALSE	no hit	7.64305
SIN3A	Q96ST3	Paired amphipathic helix protein Sin3a OS=Homo sapiens GN=SIN3A PE=1 SV=2	1	1	NA	1	NA	8	8	NA	2	2	NA	2	2	NA	6.16264	6.16264	NA	TRUE	FALSE	TRUE	0.112836878	23.02077356	0.52499484	0.610399109	0.790298847	-6.125070616	0.797474082	1	1	FA_8_3_UV - FA_8_3_noUV	Huh7	limma	0.610399109	0.790298847	FALSE	no hit	6.16264
CTSZ	Q9UBR2	Cathepsin Z OS=Homo sapiens GN=CTSZ PE=1 SV=1	2	1	1	1	1	8	8	8	2	2	2	5	3	5	7.218595	7.11991	7.31728	TRUE	TRUE	TRUE	0.069866196	24.04942094	0.521408998	0.612809393	0.792510658	-6.12699995	0.798827588	1	1	FA_8_3_UV - FA_8_3_noUV	Huh7	limma	0.612809393	0.792510658	FALSE	no hit	7.11991
UBE2I	B0QYN7|H3BPC4|H3BQQ9|P63279	SUMO-conjugating enzyme OS=Homo sapiens GN=UBE2I PE=1 SV=1|SUMO-conjugating enzyme UBC9 (Fragment) OS=Homo sapiens GN=UBE2I PE=1 SV=2|SUMO-conjugating enzyme (Fragment) OS=Homo sapiens GN=UBE2I PE=1 SV=1|SUMO-conjugating enzyme UBC9 OS=Homo sapiens GN=UBE2I PE=1 SV=1	2	1	1	1	1	8	8	8	2	2	2	3	2	3	6.147585	6.1993	6.09587	TRUE	TRUE	TRUE	-0.074906895	22.93541281	-0.520241729	0.613595032	0.792618754	-6.127625286	0.799268314	1	1	FA_8_3_UV - FA_8_3_noUV	Huh7	limma	0.613595032	0.792618754	FALSE	no hit	6.1993
WDR82	Q6UXN9	WD repeat-containing protein 82 OS=Homo sapiens GN=WDR82 PE=1 SV=1	1	1	NA	1	NA	8	8	NA	2	2	NA	2	2	NA	6.25025	6.25025	NA	TRUE	FALSE	TRUE	0.075980225	23.01238194	0.517373318	0.615527799	0.794206725	-6.129156319	0.800351612	1	1	FA_8_3_UV - FA_8_3_noUV	Huh7	limma	0.615527799	0.794206725	FALSE	no hit	6.25025
PLOD2	E7ETU9|O00469|O00469-2	Procollagen-lysine,2-oxoglutarate 5-dioxygenase 2 OS=Homo sapiens GN=PLOD2 PE=1 SV=1|Procollagen-lysine,2-oxoglutarate 5-dioxygenase 2 OS=Homo sapiens GN=PLOD2 PE=1 SV=2|Isoform 2 of Procollagen-lysine,2-oxoglutarate 5-dioxygenase 2 OS=Homo sapiens GN=PLOD2	1	1	NA	1	NA	8	8	NA	2	2	NA	7	7	NA	6.93329	6.93329	NA	TRUE	FALSE	TRUE	0.061560126	25.00400767	0.513920239	0.617858585	0.796304044	-6.130988764	0.801656228	1	1	FA_8_3_UV - FA_8_3_noUV	Huh7	limma	0.617858585	0.796304044	FALSE	no hit	6.93329
NEU1	Q99519	Sialidase-1 OS=Homo sapiens GN=NEU1 PE=1 SV=1	1	1	NA	1	NA	8	8	NA	2	2	NA	2	2	NA	5.82609	5.82609	NA	TRUE	FALSE	TRUE	-0.278727246	21.59884061	-0.508388342	0.621601753	0.799640006	-6.13390008	0.803747399	1	1	FA_8_3_UV - FA_8_3_noUV	Huh7	limma	0.621601753	0.799640006	FALSE	no hit	5.82609
SEC13	A0A0C4DFR6|P55735|P55735-2|P55735-3	Protein SEC13 homolog OS=Homo sapiens GN=SEC13 PE=1 SV=1|Protein SEC13 homolog OS=Homo sapiens GN=SEC13 PE=1 SV=3|Isoform 2 of Protein SEC13 homolog OS=Homo sapiens GN=SEC13|Isoform 3 of Protein SEC13 homolog OS=Homo sapiens GN=SEC13	2	1	1	1	1	8	8	8	2	2	2	5	5	5	6.940815	7.07658	6.80505	TRUE	TRUE	TRUE	-0.066384081	25.01844605	-0.508002094	0.62186353	0.799640006	-6.134102235	0.803893461	1	1	FA_8_3_UV - FA_8_3_noUV	Huh7	limma	0.62186353	0.799640006	FALSE	no hit	7.07658
NDUFS1	P28331|P28331-2|P28331-4	NADH-ubiquinone oxidoreductase 75 kDa subunit, mitochondrial OS=Homo sapiens GN=NDUFS1 PE=1 SV=3|Isoform 2 of NADH-ubiquinone oxidoreductase 75 kDa subunit, mitochondrial OS=Homo sapiens GN=NDUFS1|Isoform 4 of NADH-ubiquinone oxidoreductase 75 kDa subunit, mitochondrial OS=Homo sapiens GN=NDUFS1	1	1	NA	1	NA	8	8	NA	2	2	NA	5	5	NA	7.09493	7.09493	NA	TRUE	FALSE	TRUE	0.050656336	25.04286992	0.506091895	0.623158962	0.800394161	-6.135099852	0.804615917	1	1	FA_8_3_UV - FA_8_3_noUV	Huh7	limma	0.623158962	0.800394161	FALSE	no hit	7.09493
RUVBL1	Q9Y265	RuvB-like 1 OS=Homo sapiens GN=RUVBL1 PE=1 SV=1	1	1	NA	1	NA	8	8	NA	2	2	NA	5	5	NA	6.60027	6.60027	NA	TRUE	FALSE	TRUE	-0.055302348	24.24758919	-0.502327271	0.625715917	0.80206529	-6.137055491	0.806040222	1	1	FA_8_3_UV - FA_8_3_noUV	Huh7	limma	0.625715917	0.80206529	FALSE	no hit	6.60027
ALDH9A1	P49189	4-trimethylaminobutyraldehyde dehydrogenase OS=Homo sapiens GN=ALDH9A1 PE=1 SV=3	2	1	1	1	1	8	8	8	2	2	2	9	9	6	6.933985	7.39819	6.46978	TRUE	TRUE	TRUE	0.059344463	26.28764597	0.502084647	0.625880886	0.80206529	-6.137181052	0.806132039	1	1	FA_8_3_UV - FA_8_3_noUV	Huh7	limma	0.625880886	0.80206529	FALSE	no hit	7.39819
STAG2	Q8N3U4|Q8N3U4-2	Cohesin subunit SA-2 OS=Homo sapiens GN=STAG2 PE=1 SV=3|Isoform 2 of Cohesin subunit SA-2 OS=Homo sapiens GN=STAG2	1	1	NA	1	NA	8	8	NA	2	2	NA	2	2	NA	6.13406	6.13406	NA	TRUE	FALSE	TRUE	0.090897337	22.93307035	0.49995885	0.627327215	0.802334889	-6.13827871	0.806936619	1	1	FA_8_3_UV - FA_8_3_noUV	Huh7	limma	0.627327215	0.802334889	FALSE	no hit	6.13406
GNL2	Q13823	Nucleolar GTP-binding protein 2 OS=Homo sapiens GN=GNL2 PE=1 SV=1	1	1	NA	1	NA	8	8	NA	2	2	NA	3	3	NA	6.30114	6.30114	NA	TRUE	FALSE	TRUE	0.085154153	23.66877022	0.499065605	0.627935444	0.802334889	-6.138738616	0.807274759	1	1	FA_8_3_UV - FA_8_3_noUV	Huh7	limma	0.627935444	0.802334889	FALSE	no hit	6.30114
LIMA1	F8VQE1|F8VS07|Q9UHB6|Q9UHB6-2|Q9UHB6-3|Q9UHB6-4|Q9UHB6-5	Isoform 3 of LIM domain and actin-binding protein 1 OS=Homo sapiens GN=LIMA1|Isoform 4 of LIM domain and actin-binding protein 1 OS=Homo sapiens GN=LIMA1|Isoform 5 of LIM domain and actin-binding protein 1 OS=Homo sapiens GN=LIMA1|Isoform Alpha of LIM domain and actin-binding protein 1 OS=Homo sapiens GN=LIMA1|LIM domain and actin-binding protein 1 OS=Homo sapiens GN=LIMA1 PE=1 SV=1	2	1	1	1	1	8	8	8	2	2	2	2	2	2	6.2083	6.30792	6.10868	TRUE	TRUE	TRUE	-0.091181299	23.34965592	-0.497679459	0.628879872	0.802334889	-6.13945075	0.807799559	1	1	FA_8_3_UV - FA_8_3_noUV	Huh7	limma	0.628879872	0.802334889	FALSE	no hit	6.30792
LGALS1	P09382	Galectin-1 OS=Homo sapiens GN=LGALS1 PE=1 SV=2	2	1	1	1	1	8	8	8	2	2	2	10	8	10	8.12524	7.91667	8.33381	TRUE	TRUE	TRUE	-0.173091062	25.92464134	-0.497600188	0.628933904	0.802334889	-6.139491419	0.807829574	1	1	FA_8_3_UV - FA_8_3_noUV	Huh7	limma	0.628933904	0.802334889	FALSE	no hit	7.91667
PSMD3	O43242|O43242-2	26S proteasome non-ATPase regulatory subunit 3 OS=Homo sapiens GN=PSMD3 PE=1 SV=2|Isoform 2 of 26S proteasome non-ATPase regulatory subunit 3 OS=Homo sapiens GN=PSMD3	1	1	NA	1	NA	8	8	NA	2	2	NA	2	2	NA	6.20225	6.20225	NA	TRUE	FALSE	TRUE	-0.073745081	22.96909658	-0.495473396	0.630384375	0.803277607	-6.140580226	0.808634962	1	1	FA_8_3_UV - FA_8_3_noUV	Huh7	limma	0.630384375	0.803277607	FALSE	no hit	6.20225
HSPA9	P38646	Stress-70 protein, mitochondrial OS=Homo sapiens GN=HSPA9 PE=1 SV=2	2	1	1	1	1	8	8	8	2	2	2	26	23	26	7.86135	8.06537	7.65733	TRUE	TRUE	TRUE	0.065164435	27.48124771	0.49239082	0.632489594	0.80505158	-6.142150454	0.809802651	1	1	FA_8_3_UV - FA_8_3_noUV	Huh7	limma	0.632489594	0.80505158	FALSE	no hit	8.06537
DDX46	A0A0C4DG89|Q7L014	Probable ATP-dependent RNA helicase DDX46 OS=Homo sapiens GN=DDX46 PE=1 SV=1|Probable ATP-dependent RNA helicase DDX46 OS=Homo sapiens GN=DDX46 PE=1 SV=2	2	1	1	1	1	8	8	8	2	2	2	4	4	2	6.288095	6.43017	6.14602	TRUE	TRUE	TRUE	0.064804769	24.42474883	0.488693096	0.635019435	0.807361421	-6.1440217	0.811203919	1	1	FA_8_3_UV - FA_8_3_noUV	Huh7	limma	0.635019435	0.807361421	FALSE	no hit	6.43017
RAB18	Q9NP72|Q9NP72-2|Q9NP72-3	Ras-related protein Rab-18 OS=Homo sapiens GN=RAB18 PE=1 SV=1|Isoform 2 of Ras-related protein Rab-18 OS=Homo sapiens GN=RAB18|Isoform 3 of Ras-related protein Rab-18 OS=Homo sapiens GN=RAB18	1	1	NA	1	NA	8	8	NA	2	2	NA	2	2	NA	6.31601	6.31601	NA	TRUE	FALSE	TRUE	0.065862346	23.42471638	0.485949322	0.636899787	0.808233199	-6.145401495	0.812244075	1	1	FA_8_3_UV - FA_8_3_noUV	Huh7	limma	0.636899787	0.808233199	FALSE	no hit	6.31601
RPS11	P62280	40S ribosomal protein S11 OS=Homo sapiens GN=RPS11 PE=1 SV=3	2	1	1	1	1	8	8	8	2	2	2	3	3	2	6.48414	6.76658	6.2017	TRUE	TRUE	TRUE	-0.04499782	24.39664738	-0.485540955	0.637179877	0.808233199	-6.145606221	0.812398914	1	1	FA_8_3_UV - FA_8_3_noUV	Huh7	limma	0.637179877	0.808233199	FALSE	no hit	6.76658
WAPL|WAPAL	Q7Z5K2|Q7Z5K2-2|Q7Z5K2-3|Q8WVX6	Wings apart-like protein homolog OS=Homo sapiens GN=WAPL PE=1 SV=1|Isoform 2 of Wings apart-like protein homolog OS=Homo sapiens GN=WAPL|Isoform 3 of Wings apart-like protein homolog OS=Homo sapiens GN=WAPL|WAPAL protein OS=Homo sapiens GN=WAPAL PE=1 SV=1	1	1	NA	1	NA	8	8	NA	2	2	NA	2	2	NA	6.58505	6.58505	NA	TRUE	FALSE	TRUE	0.083636636	22.58096107	0.483682467	0.638455325	0.808233199	-6.14653586	0.813103683	1	1	FA_8_3_UV - FA_8_3_noUV	Huh7	limma	0.638455325	0.808233199	FALSE	no hit	6.58505
FUCA1	P04066	Tissue alpha-L-fucosidase OS=Homo sapiens GN=FUCA1 PE=1 SV=4	1	1	NA	1	NA	8	8	NA	2	2	NA	3	3	NA	6.36159	6.36159	NA	TRUE	FALSE	TRUE	0.068594258	23.44562403	0.483517415	0.638568656	0.808233199	-6.146618257	0.813166281	1	1	FA_8_3_UV - FA_8_3_noUV	Huh7	limma	0.638568656	0.808233199	FALSE	no hit	6.36159
XPO4	F2Z2X4|Q9C0E2	Exportin-4 OS=Homo sapiens GN=XPO4 PE=1 SV=1|Exportin-4 OS=Homo sapiens GN=XPO4 PE=1 SV=2	1	1	NA	1	NA	8	8	NA	2	2	NA	3	3	NA	6.2203	6.2203	NA	TRUE	FALSE	TRUE	0.049681258	23.19256708	0.480652928	0.640537077	0.809011899	-6.148043972	0.814252858	1	1	FA_8_3_UV - FA_8_3_noUV	Huh7	limma	0.640537077	0.809011899	FALSE	no hit	6.2203
PHLDB2	E9PGF6|Q86SQ0	Pleckstrin homology-like domain family B member 2 OS=Homo sapiens GN=PHLDB2 PE=1 SV=1|Pleckstrin homology-like domain family B member 2 OS=Homo sapiens GN=PHLDB2 PE=1 SV=2	1	1	NA	1	NA	8	8	NA	2	2	NA	7	7	NA	6.67978	6.67978	NA	TRUE	FALSE	TRUE	0.084253141	24.77215156	0.480388282	0.640719083	0.809011899	-6.148175283	0.814353263	1	1	FA_8_3_UV - FA_8_3_noUV	Huh7	limma	0.640719083	0.809011899	FALSE	no hit	6.67978
SPTBN1	A0A087WUZ3|Q01082|Q01082-2|Q01082-3	Spectrin beta chain, non-erythrocytic 1 OS=Homo sapiens GN=SPTBN1 PE=1 SV=1|Spectrin beta chain, non-erythrocytic 1 OS=Homo sapiens GN=SPTBN1 PE=1 SV=2|Isoform Short of Spectrin beta chain, non-erythrocytic 1 OS=Homo sapiens GN=SPTBN1|Isoform 2 of Spectrin beta chain, non-erythrocytic 1 OS=Homo sapiens GN=SPTBN1	2	1	1	1	1	8	8	8	2	2	2	31	31	6	6.79452	7.17195	6.41709	TRUE	TRUE	TRUE	0.052624613	27.01489298	0.478617847	0.64193731	0.809011899	-6.149051954	0.815025036	1	1	FA_8_3_UV - FA_8_3_noUV	Huh7	limma	0.64193731	0.809011899	FALSE	no hit	7.17195
EIF3A	Q14152|Q14152-2	Eukaryotic translation initiation factor 3 subunit A OS=Homo sapiens GN=EIF3A PE=1 SV=1|Isoform 2 of Eukaryotic translation initiation factor 3 subunit A OS=Homo sapiens GN=EIF3A	2	1	1	1	1	8	8	8	2	2	2	4	4	2	6.02147	6.13726	5.90568	TRUE	TRUE	TRUE	0.087918008	23.11229681	0.478453885	0.642050187	0.809011899	-6.149132986	0.815087256	1	1	FA_8_3_UV - FA_8_3_noUV	Huh7	limma	0.642050187	0.809011899	FALSE	no hit	6.13726
ESYT1	Q9BSJ8|Q9BSJ8-2	Extended synaptotagmin-1 OS=Homo sapiens GN=ESYT1 PE=1 SV=1|Isoform 2 of Extended synaptotagmin-1 OS=Homo sapiens GN=ESYT1	1	1	NA	1	NA	8	8	NA	2	2	NA	2	2	NA	6.22401	6.22401	NA	TRUE	FALSE	TRUE	0.129616673	22.49558247	0.475391142	0.644160433	0.81054182	-6.150641767	0.816249724	1	1	FA_8_3_UV - FA_8_3_noUV	Huh7	limma	0.644160433	0.81054182	FALSE	no hit	6.22401
LSM2	Q9Y333	U6 snRNA-associated Sm-like protein LSm2 OS=Homo sapiens GN=LSM2 PE=1 SV=1	2	1	1	1	1	8	8	8	2	2	2	5	3	5	6.812785	7.01969	6.60588	TRUE	TRUE	TRUE	-0.065513721	23.72077819	-0.474508065	0.64476949	0.81054182	-6.151075071	0.816584972	1	1	FA_8_3_UV - FA_8_3_noUV	Huh7	limma	0.64476949	0.81054182	FALSE	no hit	7.01969
HSPD1	P10809	60 kDa heat shock protein, mitochondrial OS=Homo sapiens GN=HSPD1 PE=1 SV=2	2	1	1	1	1	8	8	8	2	2	2	28	20	28	8.36255	8.38351	8.34159	TRUE	TRUE	TRUE	0.093952328	27.47745778	0.473567997	0.645418155	0.81054182	-6.151535491	0.816941893	1	1	FA_8_3_UV - FA_8_3_noUV	Huh7	limma	0.645418155	0.81054182	FALSE	no hit	8.38351
DDX23	Q9BUQ8	Probable ATP-dependent RNA helicase DDX23 OS=Homo sapiens GN=DDX23 PE=1 SV=3	1	1	NA	1	NA	8	8	NA	2	2	NA	3	3	NA	6.28954	6.28954	NA	TRUE	FALSE	TRUE	0.068048409	24.05950051	0.471273936	0.647002398	0.810817736	-6.152655392	0.817813051	1	1	FA_8_3_UV - FA_8_3_noUV	Huh7	limma	0.647002398	0.810817736	FALSE	no hit	6.28954
HEXB	P07686	Beta-hexosaminidase subunit beta OS=Homo sapiens GN=HEXB PE=1 SV=3	2	1	1	1	1	8	8	8	2	2	2	12	3	12	6.914555	6.71905	7.11006	TRUE	TRUE	TRUE	0.102055409	24.00522299	0.471145964	0.647090828	0.810817736	-6.152717712	0.817861655	1	1	FA_8_3_UV - FA_8_3_noUV	Huh7	limma	0.647090828	0.810817736	FALSE	no hit	6.71905
OSBPL6	Q9BZF3|Q9BZF3-2|Q9BZF3-3|Q9BZF3-4|Q9BZF3-5	Oxysterol-binding protein-related protein 6 OS=Homo sapiens GN=OSBPL6 PE=1 SV=1|Isoform 2 of Oxysterol-binding protein-related protein 6 OS=Homo sapiens GN=OSBPL6|Isoform 3 of Oxysterol-binding protein-related protein 6 OS=Homo sapiens GN=OSBPL6|Isoform 4 of Oxysterol-binding protein-related protein 6 OS=Homo sapiens GN=OSBPL6|Isoform 5 of Oxysterol-binding protein-related protein 6 OS=Homo sapie…	1	1	NA	1	NA	8	8	NA	2	2	NA	4	4	NA	6.07398	6.07398	NA	TRUE	FALSE	TRUE	0.065432225	23.84540468	0.470130996	0.647792381	0.810817736	-6.153211403	0.818247161	1	1	FA_8_3_UV - FA_8_3_noUV	Huh7	limma	0.647792381	0.810817736	FALSE	no hit	6.07398
HNRNPC	G3V2Q1|G3V4C1|P07910|P07910-2	Heterogeneous nuclear ribonucleoproteins C1/C2 OS=Homo sapiens GN=HNRNPC PE=1 SV=1|Heterogeneous nuclear ribonucleoproteins C1/C2 OS=Homo sapiens GN=HNRNPC PE=1 SV=4|Isoform C1 of Heterogeneous nuclear ribonucleoproteins C1/C2 OS=Homo sapiens GN=HNRNPC	2	1	1	1	1	8	8	8	2	2	2	15	10	15	7.585725	7.44819	7.72326	TRUE	TRUE	TRUE	0.08782399	26.48697503	0.469087633	0.648513935	0.810821963	-6.153717842	0.818643498	1	1	FA_8_3_UV - FA_8_3_noUV	Huh7	limma	0.648513935	0.810821963	FALSE	no hit	7.44819
OSBP	P22059	Oxysterol-binding protein 1 OS=Homo sapiens GN=OSBP PE=1 SV=1	1	1	NA	1	NA	8	8	NA	2	2	NA	2	2	NA	6.25978	6.25978	NA	TRUE	FALSE	TRUE	0.078212843	22.4916673	0.465999124	0.65065206	0.811767999	-6.155210661	0.819816987	1	1	FA_8_3_UV - FA_8_3_noUV	Huh7	limma	0.65065206	0.811767999	FALSE	no hit	6.25978
P4HA2	O15460|O15460-2	Prolyl 4-hydroxylase subunit alpha-2 OS=Homo sapiens GN=P4HA2 PE=1 SV=1|Isoform IIa of Prolyl 4-hydroxylase subunit alpha-2 OS=Homo sapiens GN=P4HA2	1	1	NA	1	NA	8	8	NA	2	2	NA	9	9	NA	7.13019	7.13019	NA	TRUE	FALSE	TRUE	0.054205254	25.87650646	0.465010227	0.651337356	0.811767999	-6.155686643	0.820192807	1	1	FA_8_3_UV - FA_8_3_noUV	Huh7	limma	0.651337356	0.811767999	FALSE	no hit	7.13019
CANX	P27824|P27824-2	Calnexin OS=Homo sapiens GN=CANX PE=1 SV=2|Isoform 2 of Calnexin OS=Homo sapiens GN=CANX	2	1	1	1	1	8	8	8	2	2	2	13	9	13	7.16614	7.32845	7.00383	TRUE	TRUE	TRUE	0.079922971	25.72225646	0.46487998	0.651427642	0.811767999	-6.155749263	0.820242309	1	1	FA_8_3_UV - FA_8_3_noUV	Huh7	limma	0.651427642	0.811767999	FALSE	no hit	7.32845
LGMN	G3V2T4|G3V4E4|Q99538|Q99538-2|Q99538-3	Legumain (Fragment) OS=Homo sapiens GN=LGMN PE=1 SV=1|Legumain OS=Homo sapiens GN=LGMN PE=1 SV=1|Legumain OS=Homo sapiens GN=LGMN PE=1 SV=1|Isoform 2 of Legumain OS=Homo sapiens GN=LGMN|Isoform 3 of Legumain OS=Homo sapiens GN=LGMN	1	1	NA	1	NA	8	8	NA	2	2	NA	2	2	NA	6.64073	6.64073	NA	TRUE	FALSE	TRUE	0.062389756	23.63989109	0.463360407	0.652481418	0.812184698	-6.156478587	0.820819896	1	1	FA_8_3_UV - FA_8_3_noUV	Huh7	limma	0.652481418	0.812184698	FALSE	no hit	6.64073
GRSF1	F5H5I6|H0Y8R1|H0YAK1|H0YAM1|Q12849|Q12849-5	G-rich sequence factor 1 OS=Homo sapiens GN=GRSF1 PE=1 SV=2|G-rich sequence factor 1 (Fragment) OS=Homo sapiens GN=GRSF1 PE=1 SV=1|G-rich sequence factor 1 (Fragment) OS=Homo sapiens GN=GRSF1 PE=1 SV=1|G-rich sequence factor 1 (Fragment) OS=Homo sapiens GN=GRSF1 PE=1 SV=1|G-rich sequence factor 1 OS=Homo sapiens GN=GRSF1 PE=1 SV=3|Isoform 2 of G-rich sequence factor 1 OS=Homo sapiens GN=GRSF1	1	1	NA	1	NA	8	8	NA	2	2	NA	2	2	NA	6.58122	6.58122	NA	TRUE	FALSE	TRUE	0.072642534	23.41008489	0.458717271	0.655706213	0.814773446	-6.158692888	0.822585343	1	1	FA_8_3_UV - FA_8_3_noUV	Huh7	limma	0.655706213	0.814773446	FALSE	no hit	6.58122
SF3B1	O75533	Splicing factor 3B subunit 1 OS=Homo sapiens GN=SF3B1 PE=1 SV=3	2	1	1	1	1	8	8	8	2	2	2	11	11	7	7.009315	7.15214	6.86649	TRUE	TRUE	TRUE	0.080601451	25.96146431	0.458288351	0.656004484	0.814773446	-6.158896359	0.822748475	1	1	FA_8_3_UV - FA_8_3_noUV	Huh7	limma	0.656004484	0.814773446	FALSE	no hit	7.15214
F8W031	F8W031	Uncharacterized protein (Fragment) OS=Homo sapiens PE=1 SV=1	1	1	NA	1	NA	8	8	NA	2	2	NA	2	2	NA	6.9776	6.9776	NA	TRUE	FALSE	TRUE	-0.091921542	23.5801157	-0.4568491	0.657005798	0.815120381	-6.159577777	0.823295926	1	1	FA_8_3_UV - FA_8_3_noUV	Huh7	limma	0.657005798	0.815120381	FALSE	no hit	6.9776
SF3B4	Q15427	Splicing factor 3B subunit 4 OS=Homo sapiens GN=SF3B4 PE=1 SV=1	2	1	1	1	1	8	8	8	2	2	2	2	2	2	6.317785	6.06732	6.56825	TRUE	TRUE	TRUE	0.069816532	23.74059715	0.451128875	0.660992439	0.818319351	-6.162265686	0.825472589	1	1	FA_8_3_UV - FA_8_3_noUV	Huh7	limma	0.660992439	0.818319351	FALSE	no hit	6.06732
TEAD1	E9PKB7|H0YE88|J3KP52|P28347	Transcriptional enhancer factor TEF-1 OS=Homo sapiens GN=TEAD1 PE=1 SV=1|Transcriptional enhancer factor TEF-1 OS=Homo sapiens GN=TEAD1 PE=1 SV=1|Transcriptional enhancer factor TEF-1 OS=Homo sapiens GN=TEAD1 PE=1 SV=1|Transcriptional enhancer factor TEF-1 OS=Homo sapiens GN=TEAD1 PE=1 SV=2	1	1	NA	1	NA	8	8	NA	2	2	NA	3	3	NA	6.31607	6.31607	NA	TRUE	FALSE	TRUE	0.177713255	23.10274258	0.451069499	0.661033878	0.818319351	-6.162293416	0.825495189	1	1	FA_8_3_UV - FA_8_3_noUV	Huh7	limma	0.661033878	0.818319351	FALSE	no hit	6.31607
NLN	E9PCB6|Q9BYT8	Neurolysin, mitochondrial OS=Homo sapiens GN=NLN PE=1 SV=1|Neurolysin, mitochondrial OS=Homo sapiens GN=NLN PE=1 SV=1	2	1	1	1	1	8	8	8	2	2	2	5	4	5	5.92664	6.0392	5.81408	TRUE	TRUE	TRUE	0.059435406	24.00104064	0.445296138	0.665068882	0.82241267	-6.164972944	0.827693446	1	1	FA_8_3_UV - FA_8_3_noUV	Huh7	limma	0.665068882	0.82241267	FALSE	no hit	6.0392
CLP1	E9PL17|Q92989	Polyribonucleotide 5'-hydroxyl-kinase Clp1 OS=Homo sapiens GN=CLP1 PE=1 SV=1|Polyribonucleotide 5'-hydroxyl-kinase Clp1 OS=Homo sapiens GN=CLP1 PE=1 SV=1	1	1	NA	1	NA	8	8	NA	2	2	NA	2	2	NA	6.13363	6.13363	NA	TRUE	FALSE	TRUE	0.053953805	23.43069968	0.441977886	0.667393067	0.823692513	-6.166497982	0.828957512	1	1	FA_8_3_UV - FA_8_3_noUV	Huh7	limma	0.667393067	0.823692513	FALSE	no hit	6.13363
HSP90B1	P14625	Endoplasmin OS=Homo sapiens GN=HSP90B1 PE=1 SV=1	2	1	1	1	1	8	8	8	2	2	2	35	24	35	8.29015	8.52953	8.05077	TRUE	TRUE	TRUE	0.054905726	28.07744807	0.441735448	0.66756302	0.823692513	-6.166608974	0.829049884	1	1	FA_8_3_UV - FA_8_3_noUV	Huh7	limma	0.66756302	0.823692513	FALSE	no hit	8.52953
RFC4	P35249	Replication factor C subunit 4 OS=Homo sapiens GN=RFC4 PE=1 SV=2	1	1	NA	1	NA	8	8	NA	2	2	NA	2	2	NA	5.56056	5.56056	NA	TRUE	FALSE	TRUE	0.100147541	21.99716207	0.437890254	0.670261181	0.824744149	-6.168361525	0.830515275	1	1	FA_8_3_UV - FA_8_3_noUV	Huh7	limma	0.670261181	0.824744149	FALSE	no hit	5.56056
RPS25	P62851	40S ribosomal protein S25 OS=Homo sapiens GN=RPS25 PE=1 SV=1	2	1	1	1	1	8	8	8	2	2	2	3	2	3	6.291365	6.20045	6.38228	TRUE	TRUE	TRUE	0.079463806	22.48917262	0.437434315	0.670581437	0.824744149	-6.168568353	0.830689071	1	1	FA_8_3_UV - FA_8_3_noUV	Huh7	limma	0.670581437	0.824744149	FALSE	no hit	6.20045
GSN	A0A0A0MS51|A0A0A0MT01|P06396|P06396-2|P06396-3|P06396-4	Gelsolin OS=Homo sapiens GN=GSN PE=1 SV=1|Isoform 2 of Gelsolin OS=Homo sapiens GN=GSN|Isoform 3 of Gelsolin OS=Homo sapiens GN=GSN|Isoform 4 of Gelsolin OS=Homo sapiens GN=GSN	2	1	1	1	1	8	8	8	2	2	2	20	6	20	7.523895	7.06688	7.98091	TRUE	TRUE	TRUE	-0.16399335	25.0600279	-0.437398146	0.670606845	0.824744149	-6.168584752	0.830702859	1	1	FA_8_3_UV - FA_8_3_noUV	Huh7	limma	0.670606845	0.824744149	FALSE	no hit	7.06688
EML2	K7EIK7|O95834|O95834-2|O95834-3	Echinoderm microtubule-associated protein-like 2 OS=Homo sapiens GN=EML2 PE=1 SV=1|Echinoderm microtubule-associated protein-like 2 OS=Homo sapiens GN=EML2 PE=1 SV=1|Isoform 2 of Echinoderm microtubule-associated protein-like 2 OS=Homo sapiens GN=EML2|Isoform 3 of Echinoderm microtubule-associated protein-like 2 OS=Homo sapiens GN=EML2	1	1	NA	1	NA	8	8	NA	2	2	NA	3	3	NA	6.10248	6.10248	NA	TRUE	FALSE	TRUE	-0.115374002	23.79713176	-0.432933672	0.673746406	0.825857237	-6.170598843	0.832405082	1	1	FA_8_3_UV - FA_8_3_noUV	Huh7	limma	0.673746406	0.825857237	FALSE	no hit	6.10248
CALM1	P62158	Calmodulin OS=Homo sapiens GN=CALM1 PE=1 SV=2	1	1	NA	1	NA	8	8	NA	2	2	NA	6	6	NA	7.79123	7.79123	NA	TRUE	FALSE	TRUE	-0.072192686	25.22750603	-0.432782349	0.673852937	0.825857237	-6.170666762	0.832462793	1	1	FA_8_3_UV - FA_8_3_noUV	Huh7	limma	0.673852937	0.825857237	FALSE	no hit	7.79123
GBE1	E9PGM4|Q04446	1,4-alpha-glucan-branching enzyme OS=Homo sapiens GN=GBE1 PE=1 SV=1|1,4-alpha-glucan-branching enzyme OS=Homo sapiens GN=GBE1 PE=1 SV=3	2	1	1	1	1	8	8	8	2	2	2	3	2	3	6.65066	6.65619	6.64513	TRUE	TRUE	TRUE	-0.068931034	23.09969261	-0.432421048	0.674107319	0.825857237	-6.170828832	0.832600587	1	1	FA_8_3_UV - FA_8_3_noUV	Huh7	limma	0.674107319	0.825857237	FALSE	no hit	6.65619
ZNF90|RPS16	A0A087WZ27|M0R210|P62249	Zinc finger protein 90 OS=Homo sapiens GN=ZNF90 PE=4 SV=2|40S ribosomal protein S16 OS=Homo sapiens GN=RPS16 PE=1 SV=1|40S ribosomal protein S16 OS=Homo sapiens GN=RPS16 PE=1 SV=2	2	1	1	1	1	8	8	8	2	2	2	4	3	4	7.012775	7.18003	6.84552	TRUE	TRUE	TRUE	-0.061508221	24.35515028	-0.431951634	0.674437885	0.825857237	-6.171039205	0.832779621	1	1	FA_8_3_UV - FA_8_3_noUV	Huh7	limma	0.674437885	0.825857237	FALSE	no hit	7.18003
GFM2	Q969S9|Q969S9-2|Q969S9-3|Q969S9-4|Q969S9-5	Ribosome-releasing factor 2, mitochondrial OS=Homo sapiens GN=GFM2 PE=1 SV=1|Isoform 2 of Ribosome-releasing factor 2, mitochondrial OS=Homo sapiens GN=GFM2|Isoform 3 of Ribosome-releasing factor 2, mitochondrial OS=Homo sapiens GN=GFM2|Isoform 4 of Ribosome-releasing factor 2, mitochondrial OS=Homo sapiens GN=GFM2|Isoform 5 of Ribosome-releasing factor 2, mitochondrial OS=Homo sapiens GN=GFM2	1	1	NA	1	NA	8	8	NA	2	2	NA	2	2	NA	6.65478	6.65478	NA	TRUE	FALSE	TRUE	-0.06905942	22.41751637	-0.429184473	0.676388012	0.827003212	-6.172274858	0.833835192	1	1	FA_8_3_UV - FA_8_3_noUV	Huh7	limma	0.676388012	0.827003212	FALSE	no hit	6.65478
OGT	O15294|O15294-3	UDP-N-acetylglucosamine--peptide N-acetylglucosaminyltransferase 110 kDa subunit OS=Homo sapiens GN=OGT PE=1 SV=3|Isoform 1 of UDP-N-acetylglucosamine--peptide N-acetylglucosaminyltransferase 110 kDa subunit OS=Homo sapiens GN=OGT	1	1	NA	1	NA	8	8	NA	2	2	NA	8	8	NA	6.75759	6.75759	NA	TRUE	FALSE	TRUE	0.05837717	25.01951763	0.42854537	0.676838767	0.827003212	-6.172559155	0.834079029	1	1	FA_8_3_UV - FA_8_3_noUV	Huh7	limma	0.676838767	0.827003212	FALSE	no hit	6.75759
HEATR3	Q7Z4Q2|Q7Z4Q2-2	HEAT repeat-containing protein 3 OS=Homo sapiens GN=HEATR3 PE=1 SV=2|Isoform 2 of HEAT repeat-containing protein 3 OS=Homo sapiens GN=HEATR3	1	1	NA	1	NA	8	8	NA	2	2	NA	2	2	NA	5.4531	5.4531	NA	TRUE	FALSE	TRUE	-0.080812481	22.67151398	-0.423972207	0.680068059	0.829760861	-6.174581543	0.835824293	1	1	FA_8_3_UV - FA_8_3_noUV	Huh7	limma	0.680068059	0.829760861	FALSE	no hit	5.4531
CCT2	F5GWF6|F8VQ14|P78371|P78371-2	Isoform 2 of T-complex protein 1 subunit beta OS=Homo sapiens GN=CCT2|T-complex protein 1 subunit beta OS=Homo sapiens GN=CCT2 PE=1 SV=1|T-complex protein 1 subunit beta OS=Homo sapiens GN=CCT2 PE=1 SV=2|T-complex protein 1 subunit beta OS=Homo sapiens GN=CCT2 PE=1 SV=4	2	1	1	1	1	8	8	8	2	2	2	4	4	4	6.826975	7.35602	6.29793	TRUE	TRUE	TRUE	-0.076066079	24.53311207	-0.422022318	0.681447008	0.829760861	-6.175437472	0.836568679	1	1	FA_8_3_UV - FA_8_3_noUV	Huh7	limma	0.681447008	0.829760861	FALSE	no hit	7.35602
CRNKL1	Q5JY65|Q9BZJ0|Q9BZJ0-2|Q9BZJ0-3	Crooked neck-like protein 1 OS=Homo sapiens GN=CRNKL1 PE=1 SV=1|Crooked neck-like protein 1 OS=Homo sapiens GN=CRNKL1 PE=1 SV=4|Isoform 2 of Crooked neck-like protein 1 OS=Homo sapiens GN=CRNKL1|Isoform 3 of Crooked neck-like protein 1 OS=Homo sapiens GN=CRNKL1	1	1	NA	1	NA	8	8	NA	2	2	NA	3	3	NA	6.39079	6.39079	NA	TRUE	FALSE	TRUE	0.052282688	24.04005133	0.420849033	0.682277337	0.829760861	-6.175950664	0.83701666	1	1	FA_8_3_UV - FA_8_3_noUV	Huh7	limma	0.682277337	0.829760861	FALSE	no hit	6.39079
LMNB2	J9JID7|Q03252	Lamin B2, isoform CRA_a OS=Homo sapiens GN=LMNB2 PE=1 SV=1|Lamin-B2 OS=Homo sapiens GN=LMNB2 PE=1 SV=4	2	1	1	1	1	8	8	8	2	2	2	9	9	6	6.876085	7.21571	6.53646	TRUE	TRUE	TRUE	0.070371626	25.49513176	0.420296935	0.682668207	0.829760861	-6.176191673	0.83722748	1	1	FA_8_3_UV - FA_8_3_noUV	Huh7	limma	0.682668207	0.829760861	FALSE	no hit	7.21571
ERAP1	Q9NZ08|Q9NZ08-2	Endoplasmic reticulum aminopeptidase 1 OS=Homo sapiens GN=ERAP1 PE=1 SV=3|Isoform 2 of Endoplasmic reticulum aminopeptidase 1 OS=Homo sapiens GN=ERAP1	2	1	1	1	1	8	8	8	2	2	2	5	5	5	6.56711	6.86472	6.2695	TRUE	TRUE	TRUE	0.056289048	24.95592321	0.420152538	0.682770451	0.829760861	-6.176254656	0.83728262	1	1	FA_8_3_UV - FA_8_3_noUV	Huh7	limma	0.682770451	0.829760861	FALSE	no hit	6.86472
TXNDC12	O95881	Thioredoxin domain-containing protein 12 OS=Homo sapiens GN=TXNDC12 PE=1 SV=1	2	1	1	1	1	8	8	8	2	2	2	10	3	10	7.26647	6.51044	8.0225	TRUE	TRUE	TRUE	0.048366322	23.92145404	0.418585693	0.683880338	0.830216024	-6.176936744	0.837880994	1	1	FA_8_3_UV - FA_8_3_noUV	Huh7	limma	0.683880338	0.830216024	FALSE	no hit	6.51044
XPO5	Q9HAV4	Exportin-5 OS=Homo sapiens GN=XPO5 PE=1 SV=1	1	1	NA	1	NA	8	8	NA	2	2	NA	6	6	NA	6.62068	6.62068	NA	TRUE	FALSE	TRUE	-0.050258942	25.07114794	-0.412220407	0.688397274	0.83480185	-6.179682382	0.840312841	1	1	FA_8_3_UV - FA_8_3_noUV	Huh7	limma	0.688397274	0.83480185	FALSE	no hit	6.62068
P4HB	P07237	Protein disulfide-isomerase OS=Homo sapiens GN=P4HB PE=1 SV=3	2	1	1	1	1	8	8	8	2	2	2	32	26	32	8.655335	8.6422	8.66847	TRUE	TRUE	TRUE	-0.062634511	28.33444301	-0.403484484	0.694617243	0.839167837	-6.183384303	0.843652864	1	1	FA_8_3_UV - FA_8_3_noUV	Huh7	limma	0.694617243	0.839167837	FALSE	no hit	8.6422
PSMD13	J3KNQ3|Q9UNM6|Q9UNM6-2	26S proteasome non-ATPase regulatory subunit 13 OS=Homo sapiens GN=PSMD13 PE=1 SV=1|26S proteasome non-ATPase regulatory subunit 13 OS=Homo sapiens GN=PSMD13 PE=1 SV=2|Isoform 2 of 26S proteasome non-ATPase regulatory subunit 13 OS=Homo sapiens GN=PSMD13	1	1	NA	1	NA	8	8	NA	2	2	NA	3	3	NA	6.57749	6.57749	NA	TRUE	FALSE	TRUE	0.073168958	24.07440464	0.403132807	0.694868135	0.839167837	-6.183531721	0.843787381	1	1	FA_8_3_UV - FA_8_3_noUV	Huh7	limma	0.694868135	0.839167837	FALSE	no hit	6.57749
ATXN2L	H3BUF6|Q8WWM7|Q8WWM7-2|Q8WWM7-3|Q8WWM7-4|Q8WWM7-5|Q8WWM7-6|Q8WWM7-8|Q8WWM7-9	Ataxin-2-like protein OS=Homo sapiens GN=ATXN2L PE=1 SV=1|Ataxin-2-like protein OS=Homo sapiens GN=ATXN2L PE=1 SV=2|Isoform 2 of Ataxin-2-like protein OS=Homo sapiens GN=ATXN2L|Isoform 3 of Ataxin-2-like protein OS=Homo sapiens GN=ATXN2L|Isoform 4 of Ataxin-2-like protein OS=Homo sapiens GN=ATXN2L|Isoform 5 of Ataxin-2-like protein OS=Homo sapiens GN=ATXN2L|Isoform 6 of Ataxin-2-like protein OS=H…	2	1	1	1	1	8	8	8	2	2	2	2	2	2	6.33428	6.49931	6.16925	TRUE	TRUE	TRUE	-0.069344363	22.98460108	-0.402842673	0.69507515	0.839167837	-6.183653248	0.843898361	1	1	FA_8_3_UV - FA_8_3_noUV	Huh7	limma	0.69507515	0.839167837	FALSE	no hit	6.49931
HNRNPF	P52597	Heterogeneous nuclear ribonucleoprotein F OS=Homo sapiens GN=HNRNPF PE=1 SV=3	2	1	1	1	1	8	8	8	2	2	2	5	5	4	6.481445	6.82488	6.13801	TRUE	TRUE	TRUE	0.045567723	24.66962732	0.402227968	0.695513838	0.839167837	-6.183910445	0.844133503	1	1	FA_8_3_UV - FA_8_3_noUV	Huh7	limma	0.695513838	0.839167837	FALSE	no hit	6.82488
G3BP1	Q13283	Ras GTPase-activating protein-binding protein 1 OS=Homo sapiens GN=G3BP1 PE=1 SV=1	1	1	NA	1	NA	8	8	NA	2	2	NA	3	3	NA	6.46591	6.46591	NA	TRUE	FALSE	TRUE	0.04623079	23.425824	0.401947562	0.69571399	0.839167837	-6.184027643	0.844240772	1	1	FA_8_3_UV - FA_8_3_noUV	Huh7	limma	0.69571399	0.839167837	FALSE	no hit	6.46591
TOP1	P11387	DNA topoisomerase 1 OS=Homo sapiens GN=TOP1 PE=1 SV=2	2	1	1	1	1	8	8	8	2	2	2	5	3	5	6.184595	5.953	6.41619	TRUE	TRUE	TRUE	0.066165325	23.0361882	0.399789019	0.69725556	0.839475253	-6.184927171	0.845066609	1	1	FA_8_3_UV - FA_8_3_noUV	Huh7	limma	0.69725556	0.839475253	FALSE	no hit	5.953
NUP37	Q8NFH4	Nucleoporin Nup37 OS=Homo sapiens GN=NUP37 PE=1 SV=1	1	1	NA	1	NA	8	8	NA	2	2	NA	2	2	NA	6.1248	6.1248	NA	TRUE	FALSE	TRUE	-0.051237686	22.66792629	-0.399175161	0.697694222	0.839475253	-6.185182126	0.845301497	1	1	FA_8_3_UV - FA_8_3_noUV	Huh7	limma	0.697694222	0.839475253	FALSE	no hit	6.1248
DHX30	H7BXY3|Q7L2E3|Q7L2E3-2|Q7L2E3-3	Putative ATP-dependent RNA helicase DHX30 OS=Homo sapiens GN=DHX30 PE=1 SV=1|Putative ATP-dependent RNA helicase DHX30 OS=Homo sapiens GN=DHX30 PE=1 SV=1|Isoform 2 of Putative ATP-dependent RNA helicase DHX30 OS=Homo sapiens GN=DHX30|Isoform 3 of Putative ATP-dependent RNA helicase DHX30 OS=Homo sapiens GN=DHX30	1	1	NA	1	NA	8	8	NA	2	2	NA	2	2	NA	5.8806	5.8806	NA	TRUE	FALSE	TRUE	0.048635841	22.30103271	0.398468249	0.698199524	0.839475253	-6.185475259	0.845572007	1	1	FA_8_3_UV - FA_8_3_noUV	Huh7	limma	0.698199524	0.839475253	FALSE	no hit	5.8806
HNRNPUL1	A0A0A0MRA5|B7Z4B8|Q9BUJ2|Q9BUJ2-2|Q9BUJ2-4	Heterogeneous nuclear ribonucleoprotein U-like protein 1 OS=Homo sapiens GN=HNRNPUL1 PE=1 SV=1|Heterogeneous nuclear ribonucleoprotein U-like protein 1 OS=Homo sapiens GN=HNRNPUL1 PE=1 SV=1|Heterogeneous nuclear ribonucleoprotein U-like protein 1 OS=Homo sapiens GN=HNRNPUL1 PE=1 SV=2|Isoform 2 of Heterogeneous nuclear ribonucleoprotein U-like protein 1 OS=Homo sapiens GN=HNRNPUL1|Isoform 4 of Het…	2	1	1	1	1	8	8	8	2	2	2	5	5	4	6.489875	6.62702	6.35273	TRUE	TRUE	TRUE	0.03651152	24.81586648	0.391526245	0.703169802	0.844551815	-6.188327105	0.848229433	1	1	FA_8_3_UV - FA_8_3_noUV	Huh7	limma	0.703169802	0.844551815	FALSE	no hit	6.62702
CTH	P32929|P32929-2|P32929-3	Cystathionine gamma-lyase OS=Homo sapiens GN=CTH PE=1 SV=3|Isoform 2 of Cystathionine gamma-lyase OS=Homo sapiens GN=CTH|Isoform 3 of Cystathionine gamma-lyase OS=Homo sapiens GN=CTH	1	1	NA	1	NA	8	8	NA	2	2	NA	2	2	NA	6.15284	6.15284	NA	TRUE	FALSE	TRUE	-0.128576008	22.62909812	-0.38915639	0.704869903	0.84569407	-6.189289531	0.849137019	1	1	FA_8_3_UV - FA_8_3_noUV	Huh7	limma	0.704869903	0.84569407	FALSE	no hit	6.15284
FLNA	P21333|P21333-2|Q60FE5	Filamin-A OS=Homo sapiens GN=FLNA PE=1 SV=4|Isoform 2 of Filamin-A OS=Homo sapiens GN=FLNA|Filamin A OS=Homo sapiens GN=FLNA PE=1 SV=1	1	1	NA	1	NA	8	8	NA	2	2	NA	73	73	NA	8.1208	8.1208	NA	TRUE	FALSE	TRUE	-0.045302739	29.13939368	-0.387903793	0.705769182	0.845874105	-6.189795933	0.849616809	1	1	FA_8_3_UV - FA_8_3_noUV	Huh7	limma	0.705769182	0.845874105	FALSE	no hit	8.1208
PPA2	Q9H2U2|Q9H2U2-2	Inorganic pyrophosphatase 2, mitochondrial OS=Homo sapiens GN=PPA2 PE=1 SV=2|Isoform 2 of Inorganic pyrophosphatase 2, mitochondrial OS=Homo sapiens GN=PPA2	2	1	1	1	1	8	8	8	2	2	2	8	8	7	7.02158	7.36463	6.67853	TRUE	TRUE	TRUE	0.052903152	25.77170454	0.382451544	0.709689007	0.849670084	-6.191981705	0.851705862	1	1	FA_8_3_UV - FA_8_3_noUV	Huh7	limma	0.709689007	0.849670084	FALSE	no hit	7.36463
GLYR1	K7EMM8|Q49A26|Q49A26-2|Q49A26-3|Q49A26-4|Q49A26-5	Putative oxidoreductase GLYR1 (Fragment) OS=Homo sapiens GN=GLYR1 PE=1 SV=2|Putative oxidoreductase GLYR1 OS=Homo sapiens GN=GLYR1 PE=1 SV=3|Isoform 2 of Putative oxidoreductase GLYR1 OS=Homo sapiens GN=GLYR1|Isoform 3 of Putative oxidoreductase GLYR1 OS=Homo sapiens GN=GLYR1|Isoform 4 of Putative oxidoreductase GLYR1 OS=Homo sapiens GN=GLYR1|Isoform 5 of Putative oxidoreductase GLYR1 OS=Homo sap…	1	1	NA	1	NA	8	8	NA	2	2	NA	2	2	NA	6.0434	6.0434	NA	TRUE	FALSE	TRUE	0.070594011	23.28279194	0.380333537	0.711214109	0.849966219	-6.192822693	0.852517668	1	1	FA_8_3_UV - FA_8_3_noUV	Huh7	limma	0.711214109	0.849966219	FALSE	no hit	6.0434
EIF3L	B0QY89|B0QY90|Q9Y262|Q9Y262-2	Eukaryotic translation initiation factor 3 subunit L OS=Homo sapiens GN=EIF3L PE=1 SV=1|Isoform 2 of Eukaryotic translation initiation factor 3 subunit L OS=Homo sapiens GN=EIF3L	2	1	1	1	1	8	8	8	2	2	2	13	13	3	6.56572	7.52254	5.6089	TRUE	TRUE	TRUE	-0.060072215	26.21031727	-0.380017135	0.711442052	0.849966219	-6.192947935	0.852638954	1	1	FA_8_3_UV - FA_8_3_noUV	Huh7	limma	0.711442052	0.849966219	FALSE	no hit	7.52254
AHNAK	Q09666	Neuroblast differentiation-associated protein AHNAK OS=Homo sapiens GN=AHNAK PE=1 SV=2	2	1	1	1	1	8	8	8	2	2	2	30	24	30	7.32702	7.79689	6.85715	TRUE	TRUE	TRUE	0.05046529	27.35236754	0.377738251	0.713084691	0.851028135	-6.193847	0.853512621	1	1	FA_8_3_UV - FA_8_3_noUV	Huh7	limma	0.713084691	0.851028135	FALSE	no hit	7.79689
DCBLD2	Q96PD2|Q96PD2-2	Discoidin, CUB and LCCL domain-containing protein 2 OS=Homo sapiens GN=DCBLD2 PE=1 SV=1|Isoform 2 of Discoidin, CUB and LCCL domain-containing protein 2 OS=Homo sapiens GN=DCBLD2	1	1	NA	1	NA	8	8	NA	2	2	NA	2	2	NA	6.00485	6.00485	NA	TRUE	FALSE	TRUE	0.080904656	23.20173525	0.373598177	0.716072793	0.853691852	-6.195466884	0.85510028	1	1	FA_8_3_UV - FA_8_3_noUV	Huh7	limma	0.716072793	0.853691852	FALSE	no hit	6.00485
FAHD1	Q6P587|Q6P587-2|Q6P587-3	Acylpyruvase FAHD1, mitochondrial OS=Homo sapiens GN=FAHD1 PE=1 SV=2|Isoform 2 of Acylpyruvase FAHD1, mitochondrial OS=Homo sapiens GN=FAHD1|Isoform 3 of Acylpyruvase FAHD1, mitochondrial OS=Homo sapiens GN=FAHD1	1	1	NA	1	NA	8	8	NA	2	2	NA	2	2	NA	5.76016	5.76016	NA	TRUE	FALSE	TRUE	0.083839083	22.52105942	0.371760924	0.717400435	0.854372459	-6.19618018	0.855805029	1	1	FA_8_3_UV - FA_8_3_noUV	Huh7	limma	0.717400435	0.854372459	FALSE	no hit	5.76016
[truncated: 17,116 more rows]
