# Supplementary material for: Trifunctional fatty acid derivatives: the impact of diazirine placement
Source: Royal Society of Chemistry journal article supplement (doi:10.1039/d4cc00974f), 2024-01-01
Supplement: d4cc00974f2.csv [file d4cc00974f2.csv]

gene_name	protein_id	description	found.in.files_Huh7	found.in.conditions_Huh7	found.in.reps_Huh7	max.qupm_Huh7	average.top3_Huh7	signal_sum_Huh7_FA_1_10_noUV_rep1	signal_sum_Huh7_FA_1_10_noUV_rep2	signal_sum_Huh7_FA_1_10_UV_rep1	signal_sum_Huh7_FA_1_10_UV_rep2	signal_sum_Huh7_FA_8_3_noUV_rep1	signal_sum_Huh7_FA_8_3_noUV_rep2	signal_sum_Huh7_FA_8_3_UV_rep1	signal_sum_Huh7_FA_8_3_UV_rep2	signal_sum_Huh7_Spa_noUV_rep1	signal_sum_Huh7_Spa_noUV_rep2	signal_sum_Huh7_Spa_UV_rep1	signal_sum_Huh7_Spa_UV_rep2	signal_sum_Huh7_Sph_noUV_rep1	signal_sum_Huh7_Sph_noUV_rep2	signal_sum_Huh7_Sph_UV_rep1	signal_sum_Huh7_Sph_UV_rep2	keep_Huh7	batchcl_raw_signal_sum_Huh7_FA_1_10_noUV_rep1	batchcl_raw_signal_sum_Huh7_FA_1_10_noUV_rep2	batchcl_raw_signal_sum_Huh7_FA_1_10_UV_rep1	batchcl_raw_signal_sum_Huh7_FA_1_10_UV_rep2	batchcl_raw_signal_sum_Huh7_FA_8_3_noUV_rep1	batchcl_raw_signal_sum_Huh7_FA_8_3_noUV_rep2	batchcl_raw_signal_sum_Huh7_FA_8_3_UV_rep1	batchcl_raw_signal_sum_Huh7_FA_8_3_UV_rep2	batchcl_raw_signal_sum_Huh7_Spa_noUV_rep1	batchcl_raw_signal_sum_Huh7_Spa_noUV_rep2	batchcl_raw_signal_sum_Huh7_Spa_UV_rep1	batchcl_raw_signal_sum_Huh7_Spa_UV_rep2	batchcl_raw_signal_sum_Huh7_Sph_noUV_rep1	batchcl_raw_signal_sum_Huh7_Sph_noUV_rep2	batchcl_raw_signal_sum_Huh7_Sph_UV_rep1	batchcl_raw_signal_sum_Huh7_Sph_UV_rep2	norm_batchcl_raw_signal_sum_Huh7_FA_1_10_noUV_rep1	norm_batchcl_raw_signal_sum_Huh7_FA_1_10_noUV_rep2	norm_batchcl_raw_signal_sum_Huh7_FA_1_10_UV_rep1	norm_batchcl_raw_signal_sum_Huh7_FA_1_10_UV_rep2	norm_batchcl_raw_signal_sum_Huh7_FA_8_3_noUV_rep1	norm_batchcl_raw_signal_sum_Huh7_FA_8_3_noUV_rep2	norm_batchcl_raw_signal_sum_Huh7_FA_8_3_UV_rep1	norm_batchcl_raw_signal_sum_Huh7_FA_8_3_UV_rep2	norm_batchcl_raw_signal_sum_Huh7_Spa_noUV_rep1
ARHGAP1	Q07960	Rho GTPase-activating protein 1 OS=Homo sapiens GN=ARHGAP1 PE=1 SV=1	1	8	2	5	7.42508	44669300	28295900	33351500	30828400	32361700	55162500	27013200	28609000	45062200	31760300	42694900	20695500	40316200	41972900	34865800	36751400	TRUE	42158554.28	29981057.64	31476898.52	32664380.26	30542732.62	58447693.55	25494857.96	30312804.26	42529370.39	33651779.41	40295130.2	21928017.07	38050130.76	44472589.11	32906083.64	38940123.54	42297920.9	37808574.27	35685267.78	33708531.27	38709722.47	47382902.22	37603244.2	31622181.49	36842181.04
RPL13A	M0QYS1|P40429	60S ribosomal protein L13a (Fragment) OS=Homo sapiens GN=RPL13A PE=1 SV=2|60S ribosomal protein L13a OS=Homo sapiens GN=RPL13A PE=1 SV=2	1	8	2	3	6.65098	14882600	12779800	13611500	15712600	10482900	22360600	11104600	16266000	13054700	14688800	18137000	11299600	14261800	15480200	12826200	13740200	TRUE	15769399.37	12061122.11	14422559.2	14828994.77	11107537.44	21103141.45	11766282.25	15351274.07	13832581.54	13862768.63	19217717.09	10664161.84	15111608.18	14609663.89	13590466.06	12967513.58	15821529.43	15210064.86	16350813.18	15303019.07	14077643.18	17108084.64	17354495	16014380.27	11982836.06
RPLP2	P05387	60S acidic ribosomal protein P2 OS=Homo sapiens GN=RPLP2 PE=1 SV=1	1	8	2	2	6.84218	21233900	16881100	15415700	9584970	14087600	25130500	15124500	13094400	32018400	13226300	24650800	13771300	26630900	30586700	27023500	17205800	TRUE	18681280.27	19187742.17	13562511.47	10894665.22	12394068.16	28564344.42	13306317.89	14883625.54	28169328.49	15033548.42	21687419.82	15653017.5	23429483.37	34766082.39	23774887.21	19556809.34	18743036.35	24197317.64	15375779.58	11242924.57	15708186.46	23156799.81	19625946.61	15526531.43	24402418.62
LARS	Q9P2J5	Leucine--tRNA ligase, cytoplasmic OS=Homo sapiens GN=LARS PE=1 SV=2	1	8	2	15	7.06297	90941600	65363300	57293000	59638000	64277300	99957800	52600700	67892800	93311700	95808900	101514000	43134600	120848000	109479000	83463700	103291000	TRUE	89204797.52	66635912.51	56198818.41	60799141.88	63049732.26	101903961.6	51596131.95	69214661.45	91529633.36	97674283.25	99575285.85	43974423.44	118540045.2	111610537.8	81869710.44	105302058.5	89499688.36	84033354.58	63712436.04	62742649.92	79908948.16	82612420.73	76100912.29	72204424.49	79289942.26
DSTN	P60981|P60981-2	Destrin OS=Homo sapiens GN=DSTN PE=1 SV=3|Isoform 2 of Destrin OS=Homo sapiens GN=DSTN	1	8	2	3	6.16379	12964300	9644550	8068720	8280150	9325670	16864600	8651120	9137030	15212400	11581000	14228100	6139400	13079200	16270800	9859580	10340100	TRUE	12588894.9	9932153.741	7835075.403	8527066.872	9055628.109	17367508.07	8400610.942	9409499.323	14771897.04	11926349.33	13816099.25	6322478.983	12700467.76	16756000.76	9574077.765	10648445.28	12630510.93	12525261.01	8882602.066	8799643.466	11477062.49	14079647.75	12390350.45	9815947.504	12796542.72
MCM6	Q14566	DNA replication licensing factor MCM6 OS=Homo sapiens GN=MCM6 PE=1 SV=1	1	8	2	16	7.29078	68548100	70691300	63983800	71820400	63612700	91119400	48768100	62474500	82944700	97056800	97455600	57536900	153614000	102584000	107206000	177399000	TRUE	70650735.03	68587457.72	65946430.32	69682954.6	65563947.25	88407597.47	50264006.02	60615197.73	85488934.37	94168294.63	100444939.7	55824545.54	158325934.8	99530999.75	110494422.2	172119432.1	70884290.34	86494413.25	74763275.14	71910442.98	83095452.97	71671066.76	74136113.88	63233502.49	74057028.54
RPL6	Q02878	60S ribosomal protein L6 OS=Homo sapiens GN=RPL6 PE=1 SV=3	1	8	2	3	6.92673	14692600	11424300	13311200	13183000	13555100	21961100	12338700	14712600	18420100	29678900	19574200	9018390	16346300	17130700	13679100	16114400	TRUE	14980004.12	11205115.09	13571582.35	12930072.93	13820253.32	21539757.62	12580059.14	14430326.25	18780418.3	29109485.06	19957093.82	8845364.517	16666052.39	16802032.95	13946678.9	15805231.53	15029524.62	14130569.74	15386063.21	13343396.21	17515727.13	17462044.56	18554762.55	15053651.65	16269029.25
NEU1	Q99519	Sialidase-1 OS=Homo sapiens GN=NEU1 PE=1 SV=1	1	8	2	2	5.82609	2425050	3065260	2346950	4723180	3392390	2559910	842901	4674890	3218240	4579350	4703170	3211190	4154010	2504460	3124560	5256880	TRUE	2808814.397	2646457.798	2718355.064	4077858.498	3929236.045	2210153.064	976290.1647	4036166.294	3727526.791	3953679.791	5447447.107	2772449.585	4811382.484	2162279.12	3619021.922	4538639.811	2818099.7	3337400.482	3081791.185	4208211.502	4979896.158	1791746.777	1439963.993	4210510.581	3229067.715
PRKAR1A	P10644	cAMP-dependent protein kinase type I-alpha regulatory subunit OS=Homo sapiens GN=PRKAR1A PE=1 SV=1	1	8	2	6	7.13322	30975200	25491600	24713200	24528600	27407000	37546200	19708600	26905900	38363600	31122700	38581300	17806500	39165200	34939700	28008400	31874600	TRUE	29940668.06	26372404.47	23887810.83	25376130.19	26491641.37	38843523.86	19050358.05	27835572.4	37082304.98	32198074.37	37292734.08	18421763.26	37857132.57	36146962.16	27072955.38	32975954.57	30039645.12	33257766.46	27081541.26	26187304.68	33575387.57	31490017.5	28098029.3	29037944.32	32123517.96
DRG1	Q9Y295	Developmentally-regulated GTP-binding protein 1 OS=Homo sapiens GN=DRG1 PE=1 SV=1	1	8	2	2	5.8179	6335020	5283590	5173540	4611090	4978980	8013590	4609670	5254090	7322780	6655180	8847220	4154470	8713050	8718280	6965170	7427930	TRUE	6149173.959	5443275.56	5021767.483	4750450.641	4832915.154	8255784.153	4474439.342	5412883.983	7107956.736	6856319.026	8587675.308	4280030.247	8457441.359	8981771.948	6760837.69	7652423.793	6169501.734	6864417.218	5693163.106	4902303.755	6125215.011	6692873.397	6599504.713	5646696.302	6157453.695
RPLP1	P05386	60S acidic ribosomal protein P1 OS=Homo sapiens GN=RPLP1 PE=1 SV=1	1	8	2	3	6.2329	32713400	24333300	24076400	18093600	23538700	39315700	20028300	21534300	30152800	20757300	33546800	14181900	37757100	35612600	29194300	28045100	TRUE	30105703.26	26441002.53	22157188	19660832	21662349.91	42721148.52	18431775.87	23399558.66	27749217.43	22555256.45	30872670.11	15410308.25	34747352.73	38697293.29	26867122.73	30474311.34	30205225.89	33344274.25	25119539.23	20289311.02	27454765.21	34633565.16	27185661.13	24410314.68	24038486.41
DNAJC7	Q99615	DnaJ homolog subfamily C member 7 OS=Homo sapiens GN=DNAJC7 PE=1 SV=2	1	8	2	3	6.32575	14532300	10048000	10682800	10395100	13194200	20590700	10444300	12108300	16593200	16206800	17863500	7189450	16116700	18916900	13732100	13007200	TRUE	13970210.8	10452279.68	10269604.12	10813345.19	12683866.65	21419163.53	10040328.97	12595475.52	15951398.05	16858878.01	17172564.6	7478716.373	15493328.41	19678018.45	13200961.42	13530542.62	14016393.15	13181182.5	11642620.15	11159005.06	16075475.76	17364280.26	14808827.04	13139543.59	13818316.36
SART3	F8VV04|Q15020|Q15020-4	Squamous cell carcinoma antigen recognized by T-cells 3 (Fragment) OS=Homo sapiens GN=SART3 PE=1 SV=1|Squamous cell carcinoma antigen recognized by T-cells 3 OS=Homo sapiens GN=SART3 PE=1 SV=1|Isoform 4 of Squamous cell carcinoma antigen recognized by T-cells 3 OS=Homo sapiens GN=SART3	1	8	2	4	6.63779	19173700	13860200	13025500	14475200	13386200	19090900	12108000	14631600	21310500	20402800	24414200	9375150	22279100	21224400	17618300	20111700	TRUE	18477872.63	14382138.14	12552795.23	15020297.4	12900405.17	19809812.34	11668591.97	15182587.01	20537126.62	21171115	23528191.12	9728193.128	21470575.43	22023654.26	16978919.22	20869052.95	18538956.29	18137056.56	14231067.24	15500436.89	16349915.71	16059596.95	17210408.23	15838406.69	17790823.85
MRPL19	P49406	39S ribosomal protein L19, mitochondrial OS=Homo sapiens GN=MRPL19 PE=1 SV=2	1	8	2	3	6.14765	5820580	4433120	6624480	7301120	5225420	6938100	5078170	6415810	6906300	9404710	10788900	4899930	5885900	5721240	7038340	8273010	TRUE	5818760.743	4434506.031	6622409.479	7303402.722	5223786.764	6940269.223	5076582.788	6417815.927	6904141.395	9407650.417	10785527.86	4901461.981	5884060.327	5723028.767	7036140.125	8275596.587	5837996.247	5592276.052	7507806.255	7536863.614	6620603.938	5626399.914	7487626.822	6695036.799	5980893.318
KDM1A	O60341|O60341-2	Lysine-specific histone demethylase 1A OS=Homo sapiens GN=KDM1A PE=1 SV=2|Isoform 2 of Lysine-specific histone demethylase 1A OS=Homo sapiens GN=KDM1A	1	8	2	3	6.42373	11076800	9774080	10670700	13422300	9584840	12508400	7306420	11630900	13193900	13971700	18929700	8792400	15315200	13795500	14204700	19067800	TRUE	11297590.53	9583063.669	10883395.86	13159985.95	9775891.739	12263946.44	7452056.677	11403595.55	13456890.05	13698648.94	19307020.03	8620568.79	15620473.28	13525892.45	14487838.02	18695155.09	11334937.8	12085029.78	12338474.05	13580658.64	12389921.39	9942246.47	10991295.09	11896179.75	11657383.47
FLNC	Q14315|Q14315-2	Filamin-C OS=Homo sapiens GN=FLNC PE=1 SV=3|Isoform 2 of Filamin-C OS=Homo sapiens GN=FLNC	1	8	2	64	8.19182	518544000	375789000	443641000	384507000	376590000	562837000	346884000	422734000	591044000	457048000	672939000	272318000	710603000	656604000	528084000	599194000	TRUE	487737698.3	399524440.9	417284628.1	408793083.9	354217076.7	598386695	326275887.4	449434563	555930528.9	485915890.7	632960209.7	289518045.2	668386620.3	698076170.4	496710934.2	637040061.9	489350048.6	503833109.5	473074362.3	421860581.5	448933135.8	485105511.3	481235545.2	468848121	481589381.7
RBM17	Q96I25	Splicing factor 45 OS=Homo sapiens GN=RBM17 PE=1 SV=1	1	8	2	2	5.97573	6392200	6936990	6469800	7131910	4719150	7271630	6445590	7907250	10143100	7462560	13994100	6153230	8371940	8156110	8598860	8718020	TRUE	6263687.599	7079316.581	6339727.485	7278235.764	4624273.542	7420822.407	6316004.217	8069483.455	9939177.386	7615669.727	13712754.71	6279476.137	8203625.788	8323449.329	8425983.66	8896888.065	6284393.93	8927599.218	7187330.505	7510892.169	5860783.567	6015979.094	9315692.181	8418048.959	8610072.74
GLDC	P23378	Glycine dehydrogenase (decarboxylating), mitochondrial OS=Homo sapiens GN=GLDC PE=1 SV=2	1	8	2	6	6.74661	24527400	20228600	27934100	31019800	21497900	26975400	18371000	27910700	27895200	25136200	46659300	20610500	31883200	26509400	32024300	41679200	TRUE	24094375.55	20592148.67	27440931.21	31577288.27	21118360.54	27460202.26	18046665.09	28412311.48	27402717.98	25587948.13	45835543	20980912.19	31320310.94	26985827.3	31458919.86	42428259.15	24174026.1	25968389.51	31109703.44	32586689.25	26765315.52	22261683.9	26617647.98	29639595.94	23738322.19
CTTN	Q14247	Src substrate cortactin OS=Homo sapiens GN=CTTN PE=1 SV=2	1	8	2	4	7.05519	17470600	11155300	16137700	16415700	13997900	23440700	10214800	14073500	18583600	15616500	22792900	9818890	18755300	17124400	15024700	18979100	TRUE	16966006.56	11487074.67	15671603.95	16903926.53	13593606.58	24137860.14	9919771.718	14492066.14	18046860.41	16080957.18	22134585.58	10110917.91	18213601.3	17633704.29	14590750.1	19543565.74	17022092.33	14486143.92	17766851.56	17444278.19	17228476.08	19568297.69	14631013.01	15118058.42	15633565.52
FAHD2A	Q96GK7	Fumarylacetoacetate hydrolase domain-containing protein 2A OS=Homo sapiens GN=FAHD2A PE=1 SV=1	1	8	2	6	7.12079	43544300	27738800	38502500	39273800	28107700	49912700	28354700	37410400	47473000	36293200	63908300	26149000	37392900	41434200	41248200	46146700	TRUE	42133291.91	28667748.8	37254866.24	40589046.14	27196899	51584233.84	27435895.22	38663242.46	45934686.45	37508628.38	61837417.52	27024707.75	36181221.68	42821796.09	39911594.66	47692113.71	42272575.02	36152384.05	42235732.88	41886517.37	34469227.93	41818770.94	40466146.92	40333321.18	39792125.26
LSM8	F2Z2Y6|O95777	U6 snRNA-associated Sm-like protein LSm8 OS=Homo sapiens GN=LSM8 PE=1 SV=1|U6 snRNA-associated Sm-like protein LSm8 OS=Homo sapiens GN=LSM8 PE=1 SV=3	1	8	2	2	6.40444	5103310	4727520	5240630	5855250	4321340	5791110	3898650	5182400	6290560	4978770	7502710	3900690	7020630	6193390	5414180	6624220	TRUE	5039968.436	4786934.76	5175584.039	5928837.9	4267704.137	5863891.799	3850260.506	5247531.623	6212482.456	5041342.432	7409587.421	3949713.285	6933490.93	6271227.593	5346979.961	6707472.2	5056629.428	6036717.603	5867544.485	6118359.393	5408869.101	4753792.577	5678881.846	5474201.461	5381725.646
COL4A3BP	Q9Y5P4|Q9Y5P4-2|Q9Y5P4-3	Collagen type IV alpha-3-binding protein OS=Homo sapiens GN=COL4A3BP PE=1 SV=1|Isoform 2 of Collagen type IV alpha-3-binding protein OS=Homo sapiens GN=COL4A3BP|Isoform 3 of Collagen type IV alpha-3-binding protein OS=Homo sapiens GN=COL4A3BP	1	8	2	2	6.69583	14762100	10101000	12021900	11259500	13169400	18825500	11970000	12346000	18996800	16969000	19243700	7986690	16042900	17238400	13164100	12828400	TRUE	13865152.9	10754441.24	11291447.8	11987885.47	12369225.56	20043335.66	11242701.25	13144671.97	17842551.98	18066737.29	18074450.3	8503354.945	15068131.32	18353564.98	12364247.58	13658278.78	13910987.95	13562233.03	12801081.35	12371090.74	15676701.05	16248911.74	16582247.35	13712462.86	15456577.99
XPOT	O43592	Exportin-T OS=Homo sapiens GN=XPOT PE=1 SV=2	1	8	2	4	6.10347	19623400	12362700	12491300	10004800	14841200	20658600	9879520	12184100	24238800	15492600	20509800	8045060	20206000	23556400	14532700	12112200	TRUE	17805082.34	13625222.43	11333847.6	11026525.38	13466004.26	22768328.93	8964076.921	13428383.17	21992816.22	17074758.83	18609347.91	8866649.837	18333698.22	25962062.46	13186090.08	13349140.49	17863941.9	17182523.72	12849149.87	11378999.78	17066753.46	18458033.8	13221425.83	14008429.11	19051853.09
DECR1	Q16698|Q16698-2	2,4-dienoyl-CoA reductase, mitochondrial OS=Homo sapiens GN=DECR1 PE=1 SV=1|Isoform 2 of 2,4-dienoyl-CoA reductase, mitochondrial OS=Homo sapiens GN=DECR1	1	8	2	3	6.06116	11732600	8714820	13936600	16063600	9629650	13134600	8676780	16008000	16156400	17570500	26978200	12302300	17068400	15017500	18166400	20038000	TRUE	11759203.45	8695104.016	13968200.98	16027258.49	9651485.05	13104884.92	8696454.435	15971784.28	16193034.33	17530749.36	27039372.56	12274467.88	17107102.27	14983525.14	18207591.97	19992667	11798076.71	10965239.78	15835708.59	16539586.54	12232248.91	10623986.05	12826700.21	16661693.75	14027640.12
PYCR1	J3QKT4|P32322|P32322-2|P32322-3	Pyrroline-5-carboxylate reductase (Fragment) OS=Homo sapiens GN=PYCR1 PE=1 SV=1|Pyrroline-5-carboxylate reductase 1, mitochondrial OS=Homo sapiens GN=PYCR1 PE=1 SV=2|Isoform 2 of Pyrroline-5-carboxylate reductase 1, mitochondrial OS=Homo sapiens GN=PYCR1|Isoform 3 of Pyrroline-5-carboxylate reductase 1, mitochondrial OS=Homo sapiens GN=PYCR1	1	8	2	2	6.22414	5754630	4628090	6721120	6395730	4807240	6470920	4640720	6447010	8072790	7522380	12345600	7148000	7845620	7048960	9829800	9913970	TRUE	5627590.013	4732566.781	6572743.65	6540110.357	4701114.723	6616997.733	4538270.84	6592547.977	7894574.001	7692193.908	12073056.87	7309362.47	7672419.037	7208086.692	9612796.012	10137772.84	5646193.55	5968155.12	7451500.249	6749171.812	5958171.735	5364327.273	6693651.988	6877316.49	6838881.505
TRIP12	Q14669|Q14669-2|Q14669-3|Q14669-4	E3 ubiquitin-protein ligase TRIP12 OS=Homo sapiens GN=TRIP12 PE=1 SV=1|Isoform 2 of E3 ubiquitin-protein ligase TRIP12 OS=Homo sapiens GN=TRIP12|Isoform 3 of E3 ubiquitin-protein ligase TRIP12 OS=Homo sapiens GN=TRIP12|Isoform 4 of E3 ubiquitin-protein ligase TRIP12 OS=Homo sapiens GN=TRIP12	1	8	2	5	6.41595	10627000	9634950	10887300	15662300	12121000	12855900	8678760	14242700	14437900	17109900	19413600	11266900	15030100	12387200	13489800	18422600	TRUE	11008170.25	9301329.045	11277806.71	15119975.29	12555757.18	12410750.04	8990050.589	13749530.53	14955759.97	16517450.51	20109928.85	10876770.95	15569201.06	11958279.3	13973653.43	17784696.8	11044560.76	11729739.3	12785616.48	15603301.08	15913110.39	10061258.53	13259735.29	14343448.6	12955818.8
DIEXF	Q68CQ4	Digestive organ expansion factor homolog OS=Homo sapiens GN=DIEXF PE=1 SV=2	1	8	2	2	6.15416	8346760	6690010	8944610	9564970	6448160	11741200	7138580	8031770	9903470	9668270	14710700	6695830	9860020	10635500	10733000	12567100	TRUE	8339116.301	6696142.115	8936418.809	9573737.326	6442254.979	11751962.07	7132042.714	8039131.983	9894400.716	9677132.011	14697228.41	6701967.45	9850990.506	10645248.58	10723171.06	12578619.1	8366683.529	8444384.769	10131191.86	9879771.833	8164885.095	9527186.38	10519295.47	8386386.439	8571283.776
DNMT1	P26358|P26358-2|P26358-3	DNA (cytosine-5)-methyltransferase 1 OS=Homo sapiens GN=DNMT1 PE=1 SV=2|Isoform 2 of DNA (cytosine-5)-methyltransferase 1 OS=Homo sapiens GN=DNMT1|Isoform 3 of DNA (cytosine-5)-methyltransferase 1 OS=Homo sapiens GN=DNMT1	1	8	2	5	6.45389	21021000	15732800	12771300	13194800	14934300	23602500	11119000	14823500	24249400	20262800	24669800	10719600	31583200	27853900	22794100	24204600	TRUE	20259178.3	16324412.76	12308455.54	13690974.37	14393066.29	24490043.24	10716036.51	15380919.64	23370577.91	21024757.89	23775742.2	11122697.49	30438593.79	28901311.95	21968019.41	25114784.47	20326150.55	20586424.26	13954060.04	14128620.65	18241707.73	19853808.65	15805451.38	16045306.41	20245375.24
CANX	P27824|P27824-2	Calnexin OS=Homo sapiens GN=CANX PE=1 SV=2|Isoform 2 of Calnexin OS=Homo sapiens GN=CANX	1	8	2	9	7.32845	56063200	36354100	47704700	74324500	38987000	66150200	33131900	58069900	53875600	56909300	96232500	49334500	57040500	54959500	67482000	70420200	TRUE	57814574.95	35252826.48	49194961.29	72072990.45	40204926.47	64146314.24	34166917.26	56310790.49	55558635.87	55185348.51	99238735.65	47840011.67	58822405.12	53294613.73	69590090.24	68286963.28	58005696.83	44456707.45	55772183.71	74376878.83	50955543.66	52002711.33	50393963.19	58743164.16	48129123.52
CPQ	Q9Y646	Carboxypeptidase Q OS=Homo sapiens GN=CPQ PE=1 SV=1	1	8	2	5	6.94968	22308500	12258500	20459900	15486900	11440600	24813000	13726900	13443200	25367500	15469900	34460700	14045400	13297400	19074900	25138300	20490400	TRUE	20491100.26	13345732.72	18793099.59	16860466.46	10508572.14	27013718.32	12608614.84	14635506.31	23300893.64	16841958.69	31653300.7	15291116.73	12214104.78	20766693.89	23090365.81	22307737.63	20558839.19	16830064.27	21305682.03	17399428.87	13318517.25	21899724.29	18596880.34	15267694.56	20185009.42
CMAS	Q8NFW8	N-acylneuraminate cytidylyltransferase OS=Homo sapiens GN=CMAS PE=1 SV=2	1	8	2	2	6.1968	9349050	7347860	8589130	8847250	6420280	10898200	6205260	7893980	9656830	8491200	14617300	5905440	11378600	12461800	12117300	14238200	TRUE	9218985.137	7451526.335	8469637.216	8972070.285	6330960.461	11051955.85	6118931.839	8005351.199	9522483.273	8610997	14413942.75	5988756.139	11220299.85	12637615.7	11948722.98	14439077.81	9249461.012	9396986.266	9602002.936	9258871.878	8023830.921	8959699.033	9025023.343	8351146.477	8249100.55
XPO5	Q9HAV4	Exportin-5 OS=Homo sapiens GN=XPO5 PE=1 SV=1	1	8	2	6	6.62068	44621800	30105200	27863200	25638500	33694600	40239600	27130100	31126600	49243600	34389700	45464500	19322700	53622800	54345700	34633600	34454100	TRUE	40964461.56	32793015.26	25579447.39	27927524.87	30932888.11	43832222.24	24906434.49	33905606.64	45207444.78	37460038.7	41738091.31	21047845.42	49227712.23	59197725.63	31794924.81	37530188.38	41099880.79	41354683.62	28999344.68	28820257.36	39204203.79	35534300.41	36735358.16	35370176.82	39162133.12
OPA1	E5KLJ5|E5KLJ6|E5KLJ9|E5KLK1|O60313|O60313-2	Dynamin-like 120 kDa protein, mitochondrial OS=Homo sapiens GN=OPA1 PE=1 SV=1|Dynamin-like 120 kDa protein, mitochondrial OS=Homo sapiens GN=OPA1 PE=1 SV=1|Dynamin-like 120 kDa protein, mitochondrial OS=Homo sapiens GN=OPA1 PE=1 SV=1|Dynamin-like 120 kDa protein, mitochondrial OS=Homo sapiens GN=OPA1 PE=1 SV=1|Dynamin-like 120 kDa protein, mitochondrial OS=Homo sapiens GN=OPA1 PE=1 SV=3|Isoform 2…	1	8	2	3	6.38274	11785900	7601540	13122700	12720400	9300200	17528500	9596630	13425800	12519200	14425100	22812200	9176120	12063700	13995900	14984700	18091600	TRUE	11835997.29	7569365.561	13178479.51	12666559.37	9339731.545	17454308.5	9637421.554	13368973.67	12572414.27	14364044.02	22909165.82	9137280.96	12114978.11	13936660.66	15048394.15	18015025.11	11875124.42	9545591.201	14940403.67	13071459.16	11837133.91	14150015.9	14214565.02	13946453.4	10891183.16
GTPBP4	Q9BZE4|Q9BZE4-2	Nucleolar GTP-binding protein 1 OS=Homo sapiens GN=GTPBP4 PE=1 SV=3|Isoform 2 of Nucleolar GTP-binding protein 1 OS=Homo sapiens GN=GTPBP4	1	8	2	2	6.078	10706500	7376940	10791400	11668300	8007950	11434100	7677060	11343700	11867900	16026900	19001200	8213990	11120500	10619800	11909900	14529100	TRUE	10751230.41	7346248.299	10836485.11	11619754.13	8041406.207	11386528.52	7709133.79	11296504.63	11917482.59	15960220.21	19080584.62	8179815.76	11166960.05	10575616.41	11959658.06	14468651.79	10786771.54	9264222.023	12285291.47	11991191.7	10191642.2	9230933.414	11370466.98	11784462.98	10323831.44
TRNT1	Q96Q11|Q96Q11-2	CCA tRNA nucleotidyltransferase 1, mitochondrial OS=Homo sapiens GN=TRNT1 PE=1 SV=2|Isoform 2 of CCA tRNA nucleotidyltransferase 1, mitochondrial OS=Homo sapiens GN=TRNT1	1	8	2	2	5.71823	4043570	3246360	3971790	4135450	3276580	4782290	2835140	5031520	5488540	5202800	6583860	3519100	4478750	4631160	4928260	5106820	TRUE	4084644.781	3213714.927	4012135.636	4093864.327	3309863.659	4734199.768	2863939.49	4980923.536	5544292.857	5150481.161	6650739.171	3483712.281	4524245.361	4584589.516	4978321.505	5055466.327	4098147.691	4052758.277	4548546.435	4224728.973	4194906.371	3837963.674	4224123.006	5196077.1	4802888.905
NPEPPS	E9PLK3|P55786	Puromycin-sensitive aminopeptidase OS=Homo sapiens GN=NPEPPS PE=1 SV=1|Puromycin-sensitive aminopeptidase OS=Homo sapiens GN=NPEPPS PE=1 SV=2	1	8	2	24	7.76372	239764000	190623000	154020000	129252000	186626000	274078000	124855000	171920000	287066000	203157000	239227000	104839000	264214000	274251000	183908000	181226000	TRUE	227378572.2	201006332.8	146063828.2	136292422.9	176985508.3	289007169.6	118405397.1	181284570.8	272237104.9	214223066.3	226869311.9	110549634.2	250565564.8	289189593	174407911.4	191097473.4	228130234.2	253485482.6	165592134.7	140649152.5	224310640.2	234294933.3	174640198.8	189115251.5	235832522.6
PDIA4	P13667	Protein disulfide-isomerase A4 OS=Homo sapiens GN=PDIA4 PE=1 SV=2	1	8	2	28	8.60171	321108000	174107000	357924000	340812000	175909000	463964000	204293000	279174000	254235000	199632000	584317000	225484000	235666000	230833000	356964000	385858000	TRUE	310920555.7	179811689.9	346568534.5	351978850.2	170328126.5	479165977.9	197811618.2	288321254.9	246169162.6	206173027.4	565779010	232872079.2	228189281.1	238396341.5	345638991.4	398500801.5	311948388.6	226757298.4	392903733.8	363230221.6	215873104.3	388454587.3	291759169.5	300775440.4	213250484.9
KPNA3	O00505	Importin subunit alpha-4 OS=Homo sapiens GN=KPNA3 PE=1 SV=2	1	8	2	2	6.29953	6262290	4688430	4495600	5634970	4408810	5252880	2699840	4917490	8092930	9091110	7327740	3679350	8073950	6980680	6127570	6832510	TRUE	6302337.42	4658637.954	4524349.416	5599163.284	4437004.393	5219501.227	2717105.509	4886242.421	8144684.384	9033341.672	7374600.985	3655970.028	8125583.007	6936322.137	6166755.884	6789093.665	6323171.518	5874924.802	5129241.698	5778146.383	5623439.487	4231392.229	4007552.509	5097306.185	7055546.175
STAG1	Q8WVM7|Q8WVM7-2	Cohesin subunit SA-1 OS=Homo sapiens GN=STAG1 PE=1 SV=3|Isoform 2 of Cohesin subunit SA-1 OS=Homo sapiens GN=STAG1	1	8	2	2	6.37149	7539030	11416500	7228470	11137800	7454050	8370250	7560210	14793600	11906400	10775000	12153200	7422500	11922200	7471540	7705170	11570700	TRUE	8015663.61	10737643.22	7685469.342	10475515.49	7925310.993	7872531.699	8038182.655	13913931.48	12659148.09	10134288.59	12921551.31	6981137.545	12675947	7027261.49	8192307.337	10882674.06	8042161.577	13541049.35	8712994.112	10810376.28	10044503.64	6382174.848	11855792.48	14514950.93	10966318.6
HNRNPUL1	A0A0A0MRA5|B7Z4B8|Q9BUJ2|Q9BUJ2-2|Q9BUJ2-4	Heterogeneous nuclear ribonucleoprotein U-like protein 1 OS=Homo sapiens GN=HNRNPUL1 PE=1 SV=1|Heterogeneous nuclear ribonucleoprotein U-like protein 1 OS=Homo sapiens GN=HNRNPUL1 PE=1 SV=1|Heterogeneous nuclear ribonucleoprotein U-like protein 1 OS=Homo sapiens GN=HNRNPUL1 PE=1 SV=2|Isoform 2 of Heterogeneous nuclear ribonucleoprotein U-like protein 1 OS=Homo sapiens GN=HNRNPUL1|Isoform 4 of Het…	1	8	2	5	6.62702	29552200	22277200	26465700	29800900	21851900	32752000	19374400	25948300	33806000	33083300	44723400	21200900	34961900	34198400	33903300	41721600	TRUE	29460523.65	22346523.02	26383598.54	29893635.54	21784111.4	32853918.89	19314297.05	26029046.88	33701127.58	33186249.84	44584659.8	21266873.75	34853441.77	34304819.85	33798125.74	41851430.82	29557913.46	28180799.54	29911008.49	30849216.81	27609085.17	26634310.64	28487322.03	27153385	29194484.48
CPSF2	Q9P2I0	Cleavage and polyadenylation specificity factor subunit 2 OS=Homo sapiens GN=CPSF2 PE=1 SV=2	1	8	2	2	6.331	13022800	10118300	14197800	16644100	12070600	15184500	10434200	15811900	14656300	17069500	21915700	11687700	14131900	12916100	14253000	20084300	TRUE	13292985.2	9912641.54	14492363.03	16305802.07	12321029.82	14875869.02	10650679.28	15490516.86	14960375.57	16722555.64	22370386.99	11450142.86	14425095.79	12653575.15	14548708.26	19676078.64	13336928.79	12500654.53	16429949.57	16827034.05	15615617.98	12059703.37	15709053.74	16159637.74	12959817.18
ITGB1	P05556	Integrin beta-1 OS=Homo sapiens GN=ITGB1 PE=1 SV=2	1	8	2	5	6.56856	24075500	23430000	26391500	37266600	24537000	38012000	19455200	39155200	29710300	37630400	53442200	28228200	34922800	27146200	35567500	47273500	TRUE	25765828.47	21892910.05	28244433.64	34821780.69	26259730.15	35518279.84	20821139.59	36586481.92	31796244.88	35161714.14	57194349.37	26376331.34	37374711.83	25365314.33	38064675.88	44172193.05	25851004.46	27608756.35	32020631.8	35934895.26	33281464.33	28794278.76	30709815.98	38166853.9	27544329.94
OGDH	A0A0D9SFS3|Q02218	2-oxoglutarate dehydrogenase, mitochondrial OS=Homo sapiens GN=OGDH PE=1 SV=1|2-oxoglutarate dehydrogenase, mitochondrial OS=Homo sapiens GN=OGDH PE=1 SV=3	1	8	2	17	7.45294	114720000	93073800	119791000	140264000	94662400	125361000	84290400	119841000	131038000	115273000	198293000	93429600	138449000	117127000	132692000	163455000	TRUE	112884953.1	94586798.73	117874838	142544118.1	93148191.96	127398856.3	82942101.19	121789123.8	128941932.4	117146866.8	195121129.7	94948382.58	136234386.9	119031005.2	130569475.2	166112108.7	113258125.1	119281716.1	133634359	147100689.6	118055601.1	103280851.4	122334162.1	127049867.8	111699326.2
WDR43	Q15061	WD repeat-containing protein 43 OS=Homo sapiens GN=WDR43 PE=1 SV=3	1	8	2	4	6.36542	14322500	11966600	17775700	19810300	13739500	16933900	9104500	18104700	18165000	15417800	31018600	13247600	20362300	16261400	19052300	28219200	TRUE	14303072.17	11982854.2	17751588.06	19837208.28	13720862.98	16956901.28	9092150.154	18129291.57	18140359.99	15438741.96	30976524.66	13265594.18	20334679.45	16283487.82	19026456.41	28257530.07	14350354.88	15111362.6	20124923.46	20471325.35	17389760.27	13746773.33	13410325.45	18912395.68	15714561.98
DSP	P15924	Desmoplakin OS=Homo sapiens GN=DSP PE=1 SV=3	1	8	2	36	7.25749	80830100	65982400	87082900	120615000	126039000	87834000	71986700	104853000	401281000	1536970000	200455000	78568400	93478000	187916000	84052200	133047000	TRUE	89899775.99	59325664.96	96854181.83	108446571.8	140181415.9	78972732.97	80064087.57	94274745.2	446307402.9	1381910438	222947387.1	70641907.15	103966854.7	168957807.8	93483417.09	119624350.5	90196964.27	74814532.46	109803302.6	111913179.7	177665298.4	64022325.9	118089280.6	98346991.49	386625477.6
DHX15	O43143	Pre-mRNA-splicing factor ATP-dependent RNA helicase DHX15 OS=Homo sapiens GN=DHX15 PE=1 SV=2	1	8	2	10	7.07556	37177400	29430700	33417600	37860700	33416400	38774500	25959900	38742500	43607500	43422900	59798000	27126700	49453100	46704100	41828400	51390700	TRUE	36702408.67	29811583.1	32990645.18	38350681.58	32989460.51	39276307.7	25628227.33	39243893.56	43050355.49	43984865.87	59034000.06	27477765.44	48821270.08	47308530.15	41293985.89	52055782.69	36823738.51	37594852.97	37401397.93	39576601.15	41810694.43	31840870.6	37799955.29	40939053.81	37293498.03
STK24	B4DR80|H0Y630|Q9Y6E0|Q9Y6E0-2	Serine/threonine-protein kinase 24 OS=Homo sapiens GN=STK24 PE=1 SV=1|Serine/threonine-protein kinase 24 (Fragment) OS=Homo sapiens GN=STK24 PE=1 SV=1|Serine/threonine-protein kinase 24 OS=Homo sapiens GN=STK24 PE=1 SV=1|Isoform A of Serine/threonine-protein kinase 24 OS=Homo sapiens GN=STK24	1	8	2	2	6.03932	4773110	3947700	3398380	2881150	3448320	5435760	2813710	4237790	7434320	4467420	6933620	3206610	7424410	6922230	5479070	5497010	TRUE	4529678.415	4159855.209	3225060.502	3035987.242	3272453.531	5727885.743	2670209.036	4465535.072	7055165.046	4707505.726	6580001.058	3378937.941	7045760.462	7294240.829	5199634.015	5792427.408	4544652.505	5245918.823	3656241.657	3133035.743	4147492.942	4643533.964	3938383.286	4658426.165	6111721.511
COPA	P53621|P53621-2	Coatomer subunit alpha OS=Homo sapiens GN=COPA PE=1 SV=2|Isoform 2 of Coatomer subunit alpha OS=Homo sapiens GN=COPA	1	8	2	12	7.05893	63266400	53268000	42962200	46563100	48979100	69390000	39054800	47544500	66850700	61524000	72196800	33306200	83917800	77221400	58252300	63272600	TRUE	61690232.27	54628982.11	41891874.63	47752773.84	47758874.46	71162894.59	38081820.42	48759248.33	65185235.93	63095920.54	70398147.53	34157163.85	81827140.05	79194384.61	56801049.49	64889196.77	61894166.19	68891629.92	47492695.72	49279241.11	60529383.5	57690975.83	56168188.7	50865429.24	56468417.97
CLTB	P09497-2	Isoform Non-brain of Clathrin light chain B OS=Homo sapiens GN=CLTB	1	8	2	3	6.63076	23222900	14260700	20952800	19775500	16885400	38774700	13616200	19117300	23653200	16448200	34132600	12556500	24594900	25363800	22288100	25304200	TRUE	22395580.82	14787507.08	20206353.46	20506030.3	16283855.18	40207083.16	13131120.9	19823515.62	22810551.32	17055815.91	32916621.18	13020351.92	23718703.12	26300768.7	21494083.21	26238967	22469615.54	18648260.06	22907883.81	21161526.97	20638085.09	32595440.03	19367542.53	20679802.61	19760237.54
IDH2	P48735|P48735-2	Isocitrate dehydrogenase [NADP], mitochondrial OS=Homo sapiens GN=IDH2 PE=1 SV=2|Isoform 2 of Isocitrate dehydrogenase [NADP], mitochondrial OS=Homo sapiens GN=IDH2	1	8	2	5	7.04366	24515000	15796100	25899400	26565500	16001900	25764900	17893100	23648600	26801300	23832600	47875400	16325600	25323200	29478900	31188300	35323200	TRUE	23648531.06	16374860.26	24984000.21	27538845.05	15436321.81	26708911.52	17260678.4	24515071.47	25854023.06	24705813.13	46183270.8	16923760.85	24428165.68	30558990.4	30085967.01	36617422.28	23726707.74	20650042.7	28324287.96	28419152.98	19563925.09	21652620.76	25458369.14	25574012.64	22396724.65
DDX39B	Q13838|Q13838-2	Spliceosome RNA helicase DDX39B OS=Homo sapiens GN=DDX39B PE=1 SV=1|Isoform 2 of Spliceosome RNA helicase DDX39B OS=Homo sapiens GN=DDX39B	1	8	2	2	6.88636	6600520	4781790	4922140	7669280	4820410	5205140	3816850	6879410	7860540	8511120	11742800	5201840	8872210	7504810	10305700	12754400	TRUE	6641126.479	4752552.241	4952421.065	7622386.983	4850065.22	5173313.712	3840331.307	6837346.562	7908898.137	8459079.64	11815041.85	5170033.889	8926791.943	7458922.618	10369100.79	12676414.55	6663080.537	5993358.425	5614545.274	7866044.541	6146950.929	4193948.518	5664236.929	7132689.276	6851290.162
ECHS1	P30084	Enoyl-CoA hydratase, mitochondrial OS=Homo sapiens GN=ECHS1 PE=1 SV=4	1	8	2	3	7.55474	9626910	8584220	11257100	11928300	30025500	48602000	48388700	58255800	12645400	8266410	25299000	9132470	10550500	10009800	9657460	10682200	TRUE	9165811.927	9016060.336	10717921.06	12528368.62	28587374.97	51046986.73	46071036.67	61186433.68	12039725.95	8682262.491	24087259.15	9591890.764	10045164.93	10513355.99	9194898.68	11219581.94	9196112.023	11369992.04	12150875.76	12928851.01	36231510.95	41383230.61	67951758.95	63829413.27	10429727.95
PEBP1	P30086	Phosphatidylethanolamine-binding protein 1 OS=Homo sapiens GN=PEBP1 PE=1 SV=3	1	8	2	2	6.28098	11423000	7203100	5908040	4913080	6965990	13278100	5814250	5689110	11232100	9133630	9448920	3731390	7353370	13126400	7091290	5828060	TRUE	10882979.74	7560522.327	5628738.477	5156870.102	6636674.082	13936967.63	5539382.382	5971407.196	10701104.5	9586846.433	9002224.015	3916543.905	7005740.762	13777740.18	6756050.547	6117251.982	10918956.4	9534439.157	6381284.346	5321714.838	8411290.994	11298546.34	8170225.885	6229345.213	9270112.061
GLS	O94925-3	Isoform 3 of Glutaminase kidney isoform, mitochondrial OS=Homo sapiens GN=GLS	1	8	2	12	7.32771	52402600	55832800	69117000	88112400	51663800	53717600	41355700	78895600	68921100	73964900	112623000	54666500	87973200	57972900	80957600	118558000	TRUE	53405665.34	54784148.21	70440004.34	86457472.68	52652723.59	52708675.9	42147310.9	77413782.64	70240354.51	72575691.06	114778775.2	53639753.66	89657140.64	56884052.85	82507251.4	116331243.3	53582212.36	69087307.11	79857626.87	89221176.05	66731825.95	42730343.75	62164520.66	80757710.95	60847546.85
DNAJA1	P31689	DnaJ homolog subfamily A member 1 OS=Homo sapiens GN=DNAJA1 PE=1 SV=2	1	8	2	6	6.67512	30316200	20904700	22001700	16678500	24351900	37200200	21575200	23137300	35431800	26392200	38416600	13466300	31186300	34999500	25592900	21932200	TRUE	27539547.64	23012399.28	19986570.39	18360096.12	22121516.22	40950879.74	19599133.41	25470099.35	32186611.25	29053171.98	34898034.24	14824028.68	28329955.42	38528295.96	23248853.38	24143496.13	27630587.14	29020524.15	22658716.39	18946995.76	28036710.54	33198427.73	28907436.97	26570293.44	27882495.03
PC	P11498	Pyruvate carboxylase, mitochondrial OS=Homo sapiens GN=PC PE=1 SV=2	1	8	2	13	7.29712	71158100	46173400	72816300	74364500	51104800	81485400	54826900	62894600	76366900	67178900	118393000	46273800	71062700	72840700	77320300	86603900	TRUE	67954045.16	48350490.5	69537580.94	77870809.83	48803690.47	85327462.53	52358194.48	65860100.39	72928307.12	70346406.5	113062086.7	48455624.39	67862940.76	76275162.17	73838778.13	90687301.43	68178685.82	60973936.71	78834552.1	80360031.55	61853578.63	69174035.25	77224904.57	68704961.43	63176056.2
EML2	K7EIK7|O95834|O95834-2|O95834-3	Echinoderm microtubule-associated protein-like 2 OS=Homo sapiens GN=EML2 PE=1 SV=1|Echinoderm microtubule-associated protein-like 2 OS=Homo sapiens GN=EML2 PE=1 SV=1|Isoform 2 of Echinoderm microtubule-associated protein-like 2 OS=Homo sapiens GN=EML2|Isoform 3 of Echinoderm microtubule-associated protein-like 2 OS=Homo sapiens GN=EML2	1	8	2	3	6.10248	19059300	10627400	14543100	10523400	10438000	22480200	11388800	11724800	23114800	14157900	21274000	8416300	16151900	21433000	15106500	13955000	TRUE	17544224.32	11545155.89	13387029.36	11432174.71	9608254.946	24421534.29	10483473.26	12737324.63	21277341.58	15380541.11	19582871.79	9143110.783	14867941.47	23283900.69	13905643.16	15160119.17	17602221.55	14559389.11	15176836.03	11797616.11	12177459.27	19798269.2	15462435.83	13287519.95	18432054.45
CASK	O14936|O14936-3	Peripheral plasma membrane protein CASK OS=Homo sapiens GN=CASK PE=1 SV=3|Isoform 3 of Peripheral plasma membrane protein CASK OS=Homo sapiens GN=CASK	1	8	2	3	6.09146	5924720	3823450	5469430	7918070	4297190	4227530	3596210	7179910	7410890	8375120	11648400	4389700	8535450	7404540	8093630	9257110	TRUE	5831277.389	3884718.42	5383168.064	8044952.171	4229416.223	4295273.552	3539491.834	7294963.614	7294008.036	8509326.114	11464685.51	4460042.226	8400831.869	7523193.171	7965980.099	9405449.458	5850554.27	4898948.752	6102881.887	8302117.465	5360343.17	3482131.019	5220518.428	7610073.333	6318625.507
CSPG4	Q6UVK1	Chondroitin sulfate proteoglycan 4 OS=Homo sapiens GN=CSPG4 PE=1 SV=2	1	8	2	11	7.01093	44744100	30059300	47710600	58132900	33085100	54437800	31439500	44452200	48286300	46247600	80542900	42913200	44721600	39498700	53742200	71776900	TRUE	45127575.39	29803868.56	48119499.52	57638910.77	33368652.95	53975210.19	31708949.48	44074463.67	48700133.5	45854607.11	81233185.87	42548541.45	45104882.55	39163056.46	54202792.82	71166969.72	45276756.92	37585124.3	54552935.84	59481398.72	42291281.23	43757109.16	46768621.84	45978282.89	42187766.21
IGF2BP3	F8WD15|O00425	Insulin-like growth factor 2 mRNA-binding protein 3 OS=Homo sapiens GN=IGF2BP3 PE=1 SV=1|Insulin-like growth factor 2 mRNA-binding protein 3 OS=Homo sapiens GN=IGF2BP3 PE=1 SV=2	1	8	2	2	6.40884	5628420	3841010	3855860	4891000	3597740	5880820	2615190	4361060	5822310	7310520	7929990	3233690	5702870	6592850	4941400	5434540	TRUE	5781449.201	3739342.292	3960695.669	4761540.102	3695557.732	5725160.553	2686293.513	4245627.086	5980610.81	7117017.818	8145595.807	3148097.447	5857923.397	6418343.828	5075750.047	5290693.14	5800561.361	4715617.523	4490229.094	4913747.702	4683733.311	4641324.682	3962106.835	4429019.14	5180860.76
NUP214	P35658|P35658-2|P35658-3|P35658-4|P35658-5	Nuclear pore complex protein Nup214 OS=Homo sapiens GN=NUP214 PE=1 SV=2|Isoform 2 of Nuclear pore complex protein Nup214 OS=Homo sapiens GN=NUP214|Isoform 3 of Nuclear pore complex protein Nup214 OS=Homo sapiens GN=NUP214|Isoform 4 of Nuclear pore complex protein Nup214 OS=Homo sapiens GN=NUP214|Isoform 5 of Nuclear pore complex protein Nup214 OS=Homo sapiens GN=NUP214	1	8	2	3	6.52265	18427200	16811200	21217500	21838500	13932800	23944000	12684600	20447500	25382100	22590200	32976600	15408500	24859000	20951700	24052500	29251800	TRUE	18546561.03	16703007.32	21354935.03	21697952.87	14023048.84	23789902.4	12766763.7	20315905	25546510.96	22444815.12	33190203.86	15309334.74	25020022.61	20816860.09	24208298.56	29063542.72	18607871.76	21063863.07	24210027.37	22391550.58	17772749.27	19286212.18	18830139.55	21193461	22130334.24
PMM2	H3BPH4|H3BV55|O15305	Phosphomannomutase (Fragment) OS=Homo sapiens GN=PMM2 PE=1 SV=1|Phosphomannomutase OS=Homo sapiens GN=PMM2 PE=1 SV=1|Phosphomannomutase 2 OS=Homo sapiens GN=PMM2 PE=1 SV=1	1	8	2	3	6.10068	19088500	12168500	11865200	11058500	11918500	23896900	9337770	13770600	20235100	14962200	20189300	9227900	15401800	20906900	14670800	13780900	TRUE	18759333.75	12382018.22	11660593.91	11252541.27	11712974.79	24316214.09	9176747.462	14012229.94	19886161.53	15224738.71	19841151.32	9389820.101	15136208.01	21273749.16	14417813.53	14022710.67	18821347.86	15614741.18	13219581.21	11612240.5	14844971.77	19712887.28	13535100.94	14617495.45	17226908.29
TTLL12	Q14166	Tubulin--tyrosine ligase-like protein 12 OS=Homo sapiens GN=TTLL12 PE=1 SV=2	1	8	2	3	6.45128	20864400	15208500	15759500	12051600	15677200	27510300	13956000	16720500	23695400	21948600	24108100	10258200	19676200	23782900	19425000	17193200	TRUE	19965153.66	15893502.89	15080272.57	12594413.61	15001519.67	28749385.71	13354502.62	17473604.57	22674138.82	22937182.34	23069051.63	10720237.46	18828164.55	24854100.66	18587791.16	17967595.35	20031153.93	20043011.55	17096460.9	12997007.19	19012858.81	23306810.75	19697015.92	18228385.94	19642066.64
CCT3	P49368	T-complex protein 1 subunit gamma OS=Homo sapiens GN=CCT3 PE=1 SV=4	1	8	2	14	7.51063	71432600	66810900	60472700	80000400	70520700	78126500	48757400	81440700	89218600	83871200	117488000	55397500	101516000	92307500	78652800	98888400	TRUE	72099307.18	66193095.08	61037114.33	79260630.88	71178896.08	77404058.96	49212471.06	80687612.33	90051310.57	83095637.33	118584559.5	54885235.56	102463486.8	91453926.29	79386896.01	97973972.26	72337651.14	83474925.46	69197597.98	81794279.69	90211813.96	62750619.13	72585168.74	84172955.4	78009306.43
CTSA	P10619|P10619-2|X6R5C5|X6R8A1	Lysosomal protective protein OS=Homo sapiens GN=CTSA PE=1 SV=2|Isoform 2 of Lysosomal protective protein OS=Homo sapiens GN=CTSA|Carboxypeptidase OS=Homo sapiens GN=CTSA PE=1 SV=1|Carboxypeptidase OS=Homo sapiens GN=CTSA PE=1 SV=1	1	8	2	3	7.06078	23762400	17725900	27171900	30850800	19777400	30837100	17861400	27517500	27827000	25589900	42014100	19618500	23949100	20336700	28274900	41255100	TRUE	23880339.16	17638356.11	27306761.42	30698435.44	19875560.53	30684803.1	17950050.91	27381597.8	27965112.85	25463517.74	42222627.23	19521609.03	24067965.8	20236262.01	28415235.9	41051351.15	23959282.14	22243414.67	30957595.54	31679742.98	25190196.36	24875832.34	26475148.4	28564360.05	24225511.48
RAD50	Q92878|Q92878-2|Q92878-3	DNA repair protein RAD50 OS=Homo sapiens GN=RAD50 PE=1 SV=1|Isoform 2 of DNA repair protein RAD50 OS=Homo sapiens GN=RAD50|Isoform 3 of DNA repair protein RAD50 OS=Homo sapiens GN=RAD50	1	8	2	2	5.91202	7065810	5106400	5132680	6364510	5030330	6746360	4259990	5959300	8223960	8368310	10884000	4712290	9353960	8468490	7451520	9308020	TRUE	6988001.468	5163257.671	5076159.05	6435376.21	4974936.126	6821477.953	4213079.091	6025654.363	8133397.948	8461487.701	10764145.65	4764759.417	9250954.415	8562783.165	7369464.039	9411660.987	7011102.217	6511291.679	5754826.666	6641089.728	6305211.754	5530097.139	6214015.476	6285935.614	7045769.004
STAT3	G8JLH9|P40763|P40763-2|P40763-3	Signal transducer and activator of transcription OS=Homo sapiens GN=STAT3 PE=1 SV=1|Signal transducer and activator of transcription 3 OS=Homo sapiens GN=STAT3 PE=1 SV=2|Isoform Del-701 of Signal transducer and activator of transcription 3 OS=Homo sapiens GN=STAT3|Isoform 3 of Signal transducer and activator of transcription 3 OS=Homo sapiens GN=STAT3	1	8	2	2	6.51629	20073500	14185800	13083300	11772200	15854300	21674300	13058300	15285400	21792100	19412600	19806700	9498660	23101800	22342900	15579100	15957300	TRUE	19043845.75	14952791.57	12412202.51	12408694.11	15041066.27	22846176.49	12388484.87	16111844.26	20674291.53	20462191.89	18790731.05	10012229.36	21916811.51	23550926.06	14779982.43	16820072.25	19106800.39	18856697.37	14071677.68	12805350.98	19062979.99	18521143.96	18272203.07	16807803.69	17909646.54
NOP58	Q9Y2X3	Nucleolar protein 58 OS=Homo sapiens GN=NOP58 PE=1 SV=1	1	8	2	5	6.87853	24940200	19460700	28679800	32755800	21815300	25945900	18449600	28609700	26006700	30128100	43970900	21872300	28970000	24475300	28583100	38826300	TRUE	25070526.34	19359535.72	28829667.82	32585522.62	21929297.01	25811023.13	18546009.36	28460975.66	26142599.39	29971482.43	44200672.27	21758599.29	29121384.27	24348067.88	28732462.5	38624465.81	25153403.81	24413963.41	32684110.07	33627152.87	27793092.77	20924712.52	27354148.05	29690362.2	22646711.45
CRTAP	C9JP16|O75718	Cartilage-associated protein OS=Homo sapiens GN=CRTAP PE=1 SV=1|Cartilage-associated protein OS=Homo sapiens GN=CRTAP PE=1 SV=1	1	8	2	6	7.06408	36767900	29514700	43793300	50164000	27317500	40767900	27756200	40733300	38117000	37147400	71521800	30241200	41245200	35033900	42595900	55755900	TRUE	36583324.05	29663612.22	43573456.33	50417095.32	27180365.34	40973588.64	27616863.05	40938814.07	37925651.52	37334821.92	71162758.43	30393777.67	41038147.87	35210658.56	42382067.31	56037208.46	36704260.22	37408249.54	49399099.98	52028730.41	34448273.24	33216837.59	40733062.6	42707187.28	32854088.99
QARS	P47897|P47897-2	Glutamine--tRNA ligase OS=Homo sapiens GN=QARS PE=1 SV=1|Isoform 2 of Glutamine--tRNA ligase OS=Homo sapiens GN=QARS	1	8	2	4	6.40963	11091800	10014500	7526160	9816110	9253150	12834500	6637320	9919810	13039800	14222800	15967200	8350120	19586700	17435200	11756300	17537300	TRUE	11526171.94	9637096.49	7820895.993	9446182.957	9615517.576	12350822.8	6897247.653	9545974.949	13550458.61	13686803.73	16592500.09	8035439.826	20353745.28	16778142.17	12216694.78	16876394.45	11564274.85	12153169.6	8866526.91	9748140.056	12186663.89	10012676.18	10172988.15	9958318.266	11738439.69
TTF2	Q9UNY4	Transcription termination factor 2 OS=Homo sapiens GN=TTF2 PE=1 SV=2	1	8	2	2	7.86208	15180500	10250800	10704000	9258840	11216500	17960800	9957710	11504900	16189000	13320500	17840400	7046140	14758400	16212200	10697000	10341200	TRUE	14272929.38	10902616.08	10064058.24	9847580.468	10545918.28	19102870.69	9362385.405	12236460.35	15221135.92	14167508.63	16773806.49	7494181.846	13876064.75	17243082.73	10057476.74	10998764.33	14320112.45	13749093.67	11409593.39	10162368.66	13365849.57	15486487.13	13808904.73	12765020.57	13185707.66
DYNC1LI1	Q9Y6G9	Cytoplasmic dynein 1 light intermediate chain 1 OS=Homo sapiens GN=DYNC1LI1 PE=1 SV=3	1	8	2	2	6.12001	12129000	8177870	8548090	8835560	9049520	16718200	7192350	10240900	14064300	11251900	16732500	6161510	12259500	13735300	10698200	9941060	TRUE	11700267.85	8477531.158	8245934.749	9159320.85	8729640.356	17330803.91	6938117.029	10616156.63	13567159.46	11664202.64	16141044.75	6387285.81	11826154.97	14238601.7	10320043.32	10305329.61	11738946.28	10690862.55	9348392.105	9452108.103	11063907.07	14049892.09	10233267.8	11074727	11752907.23
CBR1	P16152	Carbonyl reductase [NADPH] 1 OS=Homo sapiens GN=CBR1 PE=1 SV=3	1	8	2	3	6.40348	21609900	11453700	13703500	9082260	13224700	27411600	12314000	11810000	24398100	17496400	18822700	7814220	16538500	24792700	14535200	13140100	TRUE	19964975.96	12397375.89	12660403.24	9830551.802	12218049.02	29670055	11376670.6	12783031.62	22540940.95	18937936.87	17389934.84	8458037.372	15279605.87	26835382.56	13428795.07	14222719.21	20030975.64	15634108.47	14353062.12	10144795.65	15485100.58	24053187.21	16779843.35	13335201.27	19526680.5
WDR1	O75083	WD repeat-containing protein 1 OS=Homo sapiens GN=WDR1 PE=1 SV=4	1	8	2	11	7.40739	110482000	71869300	79879300	71491100	74443500	139882000	68024800	80385800	120257000	86176400	128818000	52066900	124957000	133006000	96830200	106916000	TRUE	104957064.9	75652496.66	75884731.23	75254388.22	70720762.32	147245382.1	64623045.83	84617304.82	114243241	90712721.74	122376126.3	54807699.23	118708205.5	140007429.7	91987958.1	112544053.3	105304029.2	95404007.19	86030297.82	77659973.3	89631177.28	119370211.5	95314756.31	88272392.99	98966199.83
NUP85	J3KT10|Q9BW27|Q9BW27-3	Nuclear pore complex protein Nup85 OS=Homo sapiens GN=NUP85 PE=1 SV=1|Nuclear pore complex protein Nup85 OS=Homo sapiens GN=NUP85 PE=1 SV=1|Isoform 3 of Nuclear pore complex protein Nup85 OS=Homo sapiens GN=NUP85	1	8	2	2	6.76632	13288300	9308370	12946800	15492300	10943700	15593500	10451900	13694600	11501600	13434400	20096500	8411840	13598200	11681400	12303200	20143300	TRUE	13349343.61	9265804.87	13006274.84	15421457.12	10993973.02	15522194.35	10499913.8	13631977.61	11554435.9	13372967.44	20188819.03	8373374.505	13660667.23	11627983.53	12359718.27	20051189.12	13393473.52	11684940.4	14745175.73	15914420.09	13933712.15	12583672.21	15486684.54	14220817.92	10009332.73
SIAE	Q9HAT2|Q9HAT2-2	Sialate O-acetylesterase OS=Homo sapiens GN=SIAE PE=1 SV=1|Isoform 2 of Sialate O-acetylesterase OS=Homo sapiens GN=SIAE	1	8	2	2	7.12235	21135800	12649600	23060200	20015300	14724400	30384600	19093400	19747300	23002000	18899100	33898900	12668400	13594000	16772000	20801500	21705000	TRUE	20073619.4	13318944.15	21901308.59	21074394.68	13984424.6	31992378.45	18133860.3	20792213.66	21846033.43	19899131.78	32195309.22	13338738.94	12910832.9	17659477.87	19756119.66	22853503.89	20139978.23	16796281.68	24829449.48	21748059.7	17723797.08	25935869.29	26746255.2	21690344.06	18924698.65
NUP37	Q8NFH4	Nucleoporin Nup37 OS=Homo sapiens GN=NUP37 PE=1 SV=1	1	8	2	2	6.1248	6115300	5256100	6588980	5972620	5341270	7433420	4048750	6099470	8525960	7139810	11075500	4354000	8618930	7206440	7398830	9038210	TRUE	5890510.836	5456679.263	6346779.077	6200542.551	5144933.007	7717088.481	3899924.084	6332233.303	8212558.627	7412273.961	10668381.4	4520154.014	8302111.191	7481446.645	7126860.218	9383119.248	5909983.53	6881320.388	7195324.874	6398749.366	6520665.04	6256158.742	5752132.368	6605757.39	7114344.016
PSMC5	P62195|P62195-2	26S protease regulatory subunit 8 OS=Homo sapiens GN=PSMC5 PE=1 SV=1|Isoform 2 of 26S protease regulatory subunit 8 OS=Homo sapiens GN=PSMC5	1	8	2	2	5.51308	5553610	3815880	3702960	3655470	4427550	6329350	3120050	4163370	6979420	6452360	7439020	3065550	8035890	6547020	5568110	5862740	TRUE	5262741.887	4026781.055	3509018.944	3857505.305	4195658.831	6679168.808	2956638.623	4393476.588	6613875.655	6808977.486	7049404.288	3234980.834	7615013.46	6908869.279	5276482.455	6186769.595	5280139.318	5078101.394	3978164.512	3980814.489	5317559.203	5414728.68	4360848.15	4583255.077	5729443.018
TOMM70	O94826	Mitochondrial import receptor subunit TOM70 OS=Homo sapiens GN=TOMM70 PE=1 SV=1	1	8	2	6	7.2243	37972200	33475000	43348400	53379200	33497800	53876200	28748700	43890400	41290500	53937600	71616100	30409400	39768000	41690400	42957800	53205000	TRUE	39551966.82	32137956.65	45151834.2	51247152.07	34891417.25	51724301.12	29944739.27	42137349.44	43008318.88	51783248.71	74595562.31	29194801.46	41422477.93	40025220.84	44744983.97	51079909.88	39682716.66	40528600.94	51188502.35	52885320.78	44221225.89	41932321.93	44166527.43	43957494	37257082.71
RAB18	Q9NP72|Q9NP72-2|Q9NP72-3	Ras-related protein Rab-18 OS=Homo sapiens GN=RAB18 PE=1 SV=1|Isoform 2 of Ras-related protein Rab-18 OS=Homo sapiens GN=RAB18|Isoform 3 of Ras-related protein Rab-18 OS=Homo sapiens GN=RAB18	1	8	2	2	6.31601	9578540	9289950	10415700	11189700	8360840	13974600	8704430	9820420	12639000	13265300	18471300	8505310	11559000	12472200	12295100	13809700	TRUE	9662989.807	9208760.379	10507530.68	11091907.49	8434553.877	13852468.83	8781173.16	9734594.331	12750432.55	13149367.76	18634153.39	8430977.749	11660910.66	12363199.07	12403500.53	13689009.97	9694933.46	11613002.61	11912356.8	11446471.89	10689915.79	11230044.1	12951654.77	10155085.16	11045396.16
UBE2N	P61088	Ubiquitin-conjugating enzyme E2 N OS=Homo sapiens GN=UBE2N PE=1 SV=1	1	8	2	2	6.62138	13715800	8675690	9436910	8028860	9702490	15750900	8493010	9160850	15829100	11754300	14475900	5842520	11890500	15288200	9974600	9962530	TRUE	12873353.52	9243436.738	8857279.823	8554277.469	9106547.473	16781656.3	7971355.678	9760346.145	14856851.24	12523514.38	13586766.96	6224860.964	11160166.38	16288676.7	9361944.039	10614488.97	12915909.91	11656732.35	10041472.23	8827723.878	11541597.46	13604704.16	11757227.07	10181949.34	12870136.52
CALR	P27797	Calreticulin OS=Homo sapiens GN=CALR PE=1 SV=1	1	8	2	19	8.97083	297661000	154286000	284927000	356890000	142321000	410279000	117086000	212179000	245092000	210602000	542663000	184704000	211954000	215964000	377162000	403517000	TRUE	299119566.6	153533670.7	286323168.9	355149733.2	143018386.2	408278397.8	117659732.3	211144372.9	246292973.6	209575062.7	545322099.3	183803346.5	212992594.4	214910916.5	379010129	401549370.7	300108388.1	193618559.5	324603739	366502465.2	181260861.8	330986805.9	173540392.1	220264863.1	213357739.4
EDC4	Q6P2E9	Enhancer of mRNA-decapping protein 4 OS=Homo sapiens GN=EDC4 PE=1 SV=1	1	8	2	3	6.47961	8408110	7136110	8022530	8917750	7669860	9702590	5586800	7784970	9232630	10290000	14277800	7437100	10383700	10559300	11077200	12133000	TRUE	8446378.686	7103777.853	8059043.757	8877345.634	7704768.614	9658629.696	5612227.771	7749698.011	9274651.408	10243378.27	14342784	7403404.134	10430960.39	10511458.13	11127616.79	12078028.04	8474300.499	8958446.89	9136514.333	9161119.254	9764989.219	7830144.847	8277668.059	8084450.218	8034409.706
GBAS	O75323	Protein NipSnap homolog 2 OS=Homo sapiens GN=GBAS PE=1 SV=1	1	8	2	2	6.68747	18064300	11022000	19193900	13722800	10614300	21653800	13757500	14348200	18201700	14934300	28445100	10263100	14133500	18700100	18774600	17365700	TRUE	16874798.31	11798938.92	17930016.18	14690117.86	9915367.423	23180172.71	12851593.35	15359602.2	17003150.77	15987016.29	26572041.29	10986544.19	13202834.43	20018266.89	17538326.34	18589805.26	16930582.57	14879430.33	20327206.9	15159702.81	12566692.24	18791911.03	18955257.72	16023068.14	14729424.71
ACOX1	Q15067|Q15067-2|Q15067-3	Peroxisomal acyl-coenzyme A oxidase 1 OS=Homo sapiens GN=ACOX1 PE=1 SV=3|Isoform 2 of Peroxisomal acyl-coenzyme A oxidase 1 OS=Homo sapiens GN=ACOX1|Isoform 3 of Peroxisomal acyl-coenzyme A oxidase 1 OS=Homo sapiens GN=ACOX1	1	8	2	4	6.69587	19908000	15842000	20383600	24448000	18596400	23713000	21347600	49987700	20693500	20022400	35839600	16958400	18946900	20778000	22261500	29251500	TRUE	20709225.93	15229083.75	21203967.13	23502123.43	19344838.71	22795560.09	22206764.69	48053709.73	21526339.5	19247746.9	37282015.96	16302290.99	19709445.09	19974113.25	23157445.9	28119779.27	20777685.94	19205124.48	24038875.51	24253393.34	24517561.91	18480109.8	32753522.18	50129414.53	18647755.41
HSPA1B|HSPA1A	A0A0G2JIW1|P0DMV8|P0DMV9	Heat shock 70 kDa protein 1B OS=Homo sapiens GN=HSPA1B PE=1 SV=1|Heat shock 70 kDa protein 1A OS=Homo sapiens GN=HSPA1A PE=1 SV=1|Heat shock 70 kDa protein 1B OS=Homo sapiens GN=HSPA1B PE=1 SV=1	1	8	2	6	7.31284	41396500	27885800	34464400	28842700	28686600	52862600	26921400	30270600	45466500	32579200	56130800	19949900	44089900	48404400	38889600	35944600	TRUE	38410668.09	30053487.15	31978564.11	31084771.24	26617503.2	56971844.8	24979622.91	32623668.25	42187108.59	35111725.99	52082217.78	21500694.38	40909799.5	52167089.1	36084584.87	38738733.48	38537645.05	37899913.83	36254004.59	32078428.4	33734904.29	46186447.87	36843306.28	34032864.44	36545687.79
LAMB1	G3XAI2|P07942	Laminin subunit beta-1 OS=Homo sapiens GN=LAMB1 PE=1 SV=1|Laminin subunit beta-1 OS=Homo sapiens GN=LAMB1 PE=1 SV=2	1	8	2	14	7.6382	88219400	55896900	106285000	102656000	61540700	114946000	75342600	90101600	103491000	81371700	172170000	66620300	76261800	81274800	113805000	116544000	TRUE	83969949.3	58725663.42	101165345.3	107851092	58576338.75	120763049.6	71713413.4	94661353.94	98505929.8	85489661.61	163876722.9	69991740.41	72588336.35	85387857.81	108323113.5	122441919.3	84247534.92	74057881.27	114690856	111298664.7	74239389.27	97901275.89	105772583.7	98750299.99	85333341.77
GPS1	C9JFE4|Q13098|Q13098-5|Q13098-7	COP9 signalosome complex subunit 1 OS=Homo sapiens GN=GPS1 PE=1 SV=2|COP9 signalosome complex subunit 1 OS=Homo sapiens GN=GPS1 PE=1 SV=4|Isoform 4 of COP9 signalosome complex subunit 1 OS=Homo sapiens GN=GPS1|Isoform 2 of COP9 signalosome complex subunit 1 OS=Homo sapiens GN=GPS1	1	8	2	5	6.748	25777600	21741800	23577100	21331600	25344500	38148200	21345800	24951700	32963300	28836700	32145100	13263400	29605400	29874300	27324500	24769900	TRUE	24499789.23	22875765.11	22408369.31	22444170.72	24088158.25	40137857.15	20287676.16	26253080.62	31329289.86	30340706.65	30551648.52	13955165.76	28137842.94	31432423.7	25970008.49	26061798.66	24580779.98	28848217.25	25404302.73	23161622.07	30529223.84	32539319.26	29922992.4	27387096	27139817.93
TSN	E9PGT1|Q15631	Translin OS=Homo sapiens GN=TSN PE=1 SV=1|Translin OS=Homo sapiens GN=TSN PE=1 SV=1	1	8	2	4	6.95522	22132700	17763900	12508200	13310500	19314400	20692600	14582700	16296700	26829100	20285300	24293900	10056700	23286100	24221500	17596700	16315500	TRUE	20564991.13	19118076.3	11622216.09	14325185.04	17946317.65	22270036.74	13549774.59	17539028.82	24928734.57	21831687.48	22573108.48	10823341.6	21636693.22	26067951.58	16350286.2	17559261.98	20632974.33	24109463.26	13176072.38	14783104.54	22745082.58	18054073.81	19985029.29	18296636.22	21595169.26
IDH3B	A0A087WZN1|A0A087X2E5|O43837|O43837-2	Isocitrate dehydrogenase [NAD] subunit, mitochondrial OS=Homo sapiens GN=IDH3B PE=1 SV=1|Isocitrate dehydrogenase [NAD] subunit, mitochondrial OS=Homo sapiens GN=IDH3B PE=1 SV=1|Isocitrate dehydrogenase [NAD] subunit beta, mitochondrial OS=Homo sapiens GN=IDH3B PE=1 SV=2|Isoform A of Isocitrate dehydrogenase [NAD] subunit beta, mitochondrial OS=Homo sapiens GN=IDH3B	1	8	2	3	6.7239	8335870	6171120	9080640	10266100	6269090	8681570	6845100	9182130	9624740	9321030	15698400	6833000	10732300	9304830	11612900	14112100	TRUE	8145134.254	6315629.978	8872862.93	10506502.7	6125644.918	8884867.536	6688475.046	9397149.22	9404513.202	9539301.86	15339199.82	6993009.315	10486730.76	9522722.503	11347181.47	14442565.02	8172060.222	7964527.736	10059138.75	10842354.02	7763614.922	7202864.376	9865062.238	9803063.932	8146905.886
HNRNPU	Q00839	Heterogeneous nuclear ribonucleoprotein U OS=Homo sapiens GN=HNRNPU PE=1 SV=6	1	8	2	8	8.30417	62686400	58089600	74290900	88252800	61880100	74446700	47101700	82752800	66038100	63226400	113057000	62930400	87495700	61419700	78668800	109478000	TRUE	63442129.13	57397630.74	75186529.63	87201523.62	62626108.61	73559883.29	47669544.49	81767040.18	66834236.26	62473240.65	114419982.5	62180766.64	88550522.89	60688062.25	79617208.33	108173886.9	63651854.43	72383123.07	85238748.71	89989011.35	79372049.45	59634188.21	70309453.2	85299009.7	57896907.7
PGM1	P36871	Phosphoglucomutase-1 OS=Homo sapiens GN=PGM1 PE=1 SV=3	1	8	2	2	6.17604	8692050	5983630	6898150	5998960	5927130	10749400	4591590	5759660	9776830	7533160	9546210	4153640	8122880	8847650	7572490	7918980	TRUE	8344061.87	6233176.594	6621981.05	6249145.93	5689836.049	11197702.48	4407764.686	5999865.951	9385412.464	7847329.562	9164025.386	4326867.073	7797678.715	9216640.215	7269323.7	8249240.14	8371645.446	7860547.251	7507320.546	6448906.403	7211272.714	9077854.221	6501163.966	6259033.258	8130359.372
YWHAE	P62258	14-3-3 protein epsilon OS=Homo sapiens GN=YWHAE PE=1 SV=1	1	8	2	9	8.12023	109500000	64123900	64283900	45595700	63691600	139184000	56091700	55049600	109289000	68360700	101275000	34863600	87323800	115425000	71337900	58836700	TRUE	99297476.34	70712442.13	58294329.13	50280524.08	57757215.93	153484746.7	50865426.98	60705784.5	99106136	75384560.87	91838830.29	38445732.36	79187515.66	127284579.3	64691081.62	64881997.88	99625731.29	89174193	66088110.41	51887793.52	73201236.68	124428395.7	75023170.36	63328002.2	85853286.12
EIF5	P55010	Eukaryotic translation initiation factor 5 OS=Homo sapiens GN=EIF5 PE=1 SV=2	1	8	2	3	6.64222	16170100	11373000	9699260	11301500	11423500	21604600	10088700	10668300	13967000	10558800	19234800	8438960	11830600	15144300	11968900	10712500	TRUE	15698570.86	11714604.4	9416424.166	11640956.8	11090384.37	22253525.21	9794507.878	10988737.72	13559714.49	10875948.73	18673902.5	8692436.293	11485613.1	15599180.82	11619880.2	11034265.33	15750466.78	14773077.59	10675372.53	12013072.13	14055903.45	18040688.1	14446257.05	11463401.92	11746457.83
TALDO1	P37837	Transaldolase OS=Homo sapiens GN=TALDO1 PE=1 SV=2	1	8	2	5	7.06916	62706600	33336700	38161300	23081400	38446000	89932900	32394800	34077800	61188100	36189700	54630100	17117500	43165300	64179100	37345000	30096000	TRUE	56248584.86	37164154.75	34231151.45	25731422.77	34486530.82	100258280.3	29058530.63	37990341.96	54886471.84	40344713.52	49003865.87	19082795.21	38719800.47	71547633.81	33498920.4	33551383.35	56434529.93	46867049.26	38807756.27	26553954.56	43708074.64	81278284.97	42859427.78	39631354.39	47546843.83
H6PD	O95479|R4GMU1	GDH/6PGL endoplasmic bifunctional protein OS=Homo sapiens GN=H6PD PE=1 SV=2|GDH/6PGL endoplasmic bifunctional protein OS=Homo sapiens GN=H6PD PE=1 SV=1	1	8	2	5	6.66433	23242800	14520100	27382500	24691900	16426300	29184800	19002700	21837400	27376300	20624800	40578000	15350000	20565700	23708600	25674600	25620400	TRUE	21868354.4	15432701.25	25763256.34	26243807.96	15454943.03	31019090.74	17878989.54	23209900.09	25757422.97	21921087.09	38178450.31	16314761.2	19349562.71	25198706.68	24156351.73	27230665.01	21940646.22	19461902.86	29207728.35	27082718.68	19587525.55	25146835.64	26370337.54	24212463.7	22313042.29
CDC123	O75794	Cell division cycle protein 123 homolog OS=Homo sapiens GN=CDC123 PE=1 SV=1	1	8	2	3	5.80827	12368100	7441820	6641480	5264020	8877890	12839800	6761660	8344300	15601400	14388600	12768700	4847470	12314000	13101500	10105700	8154350	TRUE	11358000.21	8103642.567	6099071.903	5732164.517	8152834.829	13981680.53	6209436.831	9086382.722	14327237.36	15668219.79	11725883.3	5278569.521	11308318.54	14266654.27	9280369.878	8879539.919	11395547.18	10219358.35	6914499.976	5915399.139	10332866.33	11334794.61	9158512.274	9478873.715	12411344.63
DNAJB11	Q9UBS4	DnaJ homolog subfamily B member 11 OS=Homo sapiens GN=DNAJB11 PE=1 SV=1	1	8	2	4	6.76831	18767900	15507100	21957000	29582200	17270100	23935200	16286400	25333700	22259500	26962500	33728500	18169100	23389600	19465300	21305400	33432200	TRUE	19626070.61	14829035.72	22960993.63	28288687.14	18059783.04	22888608.17	17031102.92	24225957.28	23277325.58	25783536.29	35270750.73	17374636.96	24459099.91	18614159.25	22279598.93	31970341.84	19690949.95	18700631.08	26030811.32	29192964.56	22888888.1	18555542.86	25119760.34	25272410.01	20164592.97
RPS11	P62280	40S ribosomal protein S11 OS=Homo sapiens GN=RPS11 PE=1 SV=3	1	8	2	3	6.76658	25280600	18837600	18747900	19088700	17875000	25593900	14843900	19336200	26334900	21252700	32271700	13868000	31683600	27243900	25146700	26348300	TRUE	24023409.34	19823407.4	17815577	20087647.94	16986085.85	26933277.42	14105720.82	20348100.09	25025279.57	22364894.18	30666845.69	14593738.79	30107991.59	28669625.06	23896168.11	27727156.61	24102825.28	24998943.67	20197467.53	20729770.58	21528089.1	21834511.73	20805013.53	21227046.78	21678803.89
FUS	H3BPE7|P35637|P35637-2	RNA-binding protein FUS OS=Homo sapiens GN=FUS PE=1 SV=1|RNA-binding protein FUS OS=Homo sapiens GN=FUS PE=1 SV=1|Isoform Short of RNA-binding protein FUS OS=Homo sapiens GN=FUS	1	8	2	3	7.09322	19065400	16296200	19340000	20955900	14114100	25713700	14751200	16628700	22301200	15558600	31963900	14120600	18458600	20849500	20639500	21570700	TRUE	18631767.68	16675474.75	18900122.05	21443623.74	13793082.35	26312155.9	14415691.85	17015713.29	21793971.15	15920707.98	31236898.21	14449240.23	18038769.03	21334747.41	20170065.62	22072732.48	18693360.08	21029142.23	21427013.09	22129091.56	17481290.77	21330975.35	21262200.48	17750715.81	18879598.34
PSMD13	J3KNQ3|Q9UNM6|Q9UNM6-2	26S proteasome non-ATPase regulatory subunit 13 OS=Homo sapiens GN=PSMD13 PE=1 SV=1|26S proteasome non-ATPase regulatory subunit 13 OS=Homo sapiens GN=PSMD13 PE=1 SV=2|Isoform 2 of 26S proteasome non-ATPase regulatory subunit 13 OS=Homo sapiens GN=PSMD13	1	8	2	3	6.57749	18767700	14208000	14282000	13323400	15480100	23248400	15956300	16669200	20597500	26604600	25274700	9524660	18818100	21115600	16972100	20811500	TRUE	18421043.89	14475373.01	14018198.76	13574126.18	15194168.79	23685899.63	15661572.95	16982889.06	20217045.86	27105258.22	24807853.82	9703899.655	18470512.96	21512963.57	16658610.22	21203140.86	18481939.69	18254633.38	15892390.93	14008037.29	19257021.44	19201898.28	23099793.43	17716473.72	17513545.51
SYNE2	Q8WXH0|Q8WXH0-2	Nesprin-2 OS=Homo sapiens GN=SYNE2 PE=1 SV=3|Isoform 2 of Nesprin-2 OS=Homo sapiens GN=SYNE2	1	8	2	76	7.43758	392511000	434603000	434684000	702238000	423754000	385253000	301799000	562036000	461103000	492298000	786729000	442490000	673082000	390532000	491789000	824834000	TRUE	406767752.2	419370653.7	450472556.5	677625347.9	439145557.9	371750315.6	312760918.4	542337270.3	477851145.2	475043508.8	815304506	426981223.2	697529629	376844292.6	509651719.6	795924496	408112434.2	528860812.6	510699419.5	699286349.6	556571112.4	301373891.5	461301852	565763808.7	413951070.5
YWHAH	Q04917	14-3-3 protein eta OS=Homo sapiens GN=YWHAH PE=1 SV=4	1	8	2	4	7.34385	45274000	29549300	28143400	22705900	29820500	57666700	24173400	28320900	45717400	30238400	44507000	18150700	43817300	47581200	32087200	29041600	TRUE	42131087.32	31753631.19	26189690.39	24399724.34	27750366.42	61968544.9	22495287.05	30433594.49	42543706.57	32494136.96	41417332.31	19504713.6	40775511.16	51130682.5	29859712.53	31208057.57	42270363.14	40043935	29691175.39	25179687	35170690.06	50237217.68	33179073.75	31748189.31	36854600.13
PLS3	A0A0A0MSQ0|P13797|P13797-2|P13797-3	Plastin-3 OS=Homo sapiens GN=PLS3 PE=1 SV=1|Plastin-3 OS=Homo sapiens GN=PLS3 PE=1 SV=4|Isoform 2 of Plastin-3 OS=Homo sapiens GN=PLS3|Isoform 3 of Plastin-3 OS=Homo sapiens GN=PLS3	1	8	2	10	6.98172	73636900	55578200	52026800	48371500	52478000	92993400	37446800	55461800	81912800	64360900	78294100	38948300	75191300	77675600	62327700	62385900	TRUE	72290562.33	56613287.04	51075569.83	49272369.63	51518520.34	94725306.81	36762142.75	56494719.21	80415150.21	65559555.83	76862612.58	39673672.19	73816542.52	79122228.48	61188133.69	63547773.48	72529538.54	71394001.29	57904224.12	50847412.37	65294341.83	76792764.23	54221750.66	58935037.77	69661730.12
LSM7	Q9UK45	U6 snRNA-associated Sm-like protein LSm7 OS=Homo sapiens GN=LSM7 PE=1 SV=1	1	8	2	2	6.8109	17647100	15446000	15279100	19035600	14604700	20706200	13294000	16712400	23735400	18767400	25702600	12456500	25441100	25995200	19399400	23802600	TRUE	17571637.71	15512333.63	15213763.72	19117349.35	14542247.58	20795123.82	13237152.38	16784172.25	23633903.01	18847997.55	25592690.89	12509995.07	25332309.12	26106837.7	19316444.55	23904821.47	17629725.56	19562325.83	17247799.43	19728455.38	18430779.43	16858378.13	19523932.01	17509173.23	20473487.5
SF3B3	Q15393	Splicing factor 3B subunit 3 OS=Homo sapiens GN=SF3B3 PE=1 SV=4	1	8	2	22	7.8313	110606000	95328600	142371000	158799000	119982000	133738000	105404000	161968000	127913000	124830000	229955000	102875000	182627000	125533000	167993000	237659000	TRUE	108158459.3	97485811.09	139220548.7	162392496.2	117326982.8	136764385.5	103071571.6	165633208.2	125082482	127654804.5	224866449.5	105202980.2	178585745.3	128373712.9	164275573.2	243037035.9	108516006.7	122937608.6	157833928.8	167583541.9	148699692.4	110873382.9	152023811.3	172787820.1	108355976.2
USP9X	Q93008|Q93008-1	Probable ubiquitin carboxyl-terminal hydrolase FAF-X OS=Homo sapiens GN=USP9X PE=1 SV=3|Isoform 2 of Probable ubiquitin carboxyl-terminal hydrolase FAF-X OS=Homo sapiens GN=USP9X	1	8	2	17	7.10955	78724200	59238200	59074700	62976000	63313100	84854300	49020000	65641800	80501300	71956400	98353000	42463800	93089300	79261800	70090400	79415300	TRUE	75714819.69	61592696.43	56816458.71	65479059.97	60892837.91	88226940.4	47146118.49	68250815.53	77423986.71	74816397.21	94593271.97	44151576.9	89530786.78	82412159.48	67411062.9	82571760.53	75965115.72	77673445.2	64412653.04	67572166.48	77175309.93	71524610.06	69537434.16	71198944.74	67070556.39
CLUH	K7EIG1	Clustered mitochondria protein homolog (Fragment) OS=Homo sapiens GN=CLUH PE=1 SV=2	1	8	2	3	6.08597	13297900	9950300	7084630	7694830	10303700	13057100	7522730	9483110	13226900	11173100	12638000	5820680	15168800	13400400	10114800	9755020	TRUE	12615263.46	10488730.16	6720946.465	8111212.275	9774768.208	13763645.17	7136556.969	9996259.597	12547908.19	11777698.26	11989238.88	6135648.359	14390122.38	14125521.81	9595565.231	10282883.18	12656966.66	13227149.56	7619517.347	8370495.643	12388497.43	11158035.74	10525953.7	10428053.19	10869954.13
RPS3A	P61247	40S ribosomal protein S3a OS=Homo sapiens GN=RPS3A PE=1 SV=2	1	8	2	5	6.91934	34435100	25384600	28135900	25142700	25352600	47320600	24041300	27246400	35145900	27735400	41014600	17942600	41840300	40830000	33777200	34397100	TRUE	32882844.24	26582896.33	26867597.81	26329577.28	24209762.63	49554399.28	22957573.04	28532583.79	33561603	29044667.35	39165755.39	18789591.94	39954234.72	42757406.34	32254600.88	36020837.17	32991547.47	33523213.96	30459717.05	27171229.71	30683344.68	40173206.38	33860915.27	29765063.48	29073617.65
NPC2	E7EMS2|G3V2V8|G3V3D1|G3V3E8|J3KMY5|P61916|P61916-2	Epididymal secretory protein E1 OS=Homo sapiens GN=NPC2 PE=1 SV=1|Epididymal secretory protein E1 (Fragment) OS=Homo sapiens GN=NPC2 PE=1 SV=1|Epididymal secretory protein E1 (Fragment) OS=Homo sapiens GN=NPC2 PE=1 SV=1|Epididymal secretory protein E1 OS=Homo sapiens GN=NPC2 PE=1 SV=1|Epididymal secretory protein E1 OS=Homo sapiens GN=NPC2 PE=1 SV=1|Epididymal secretory protein E1 OS=Homo sapiens…	1	8	2	2	6.38456	8708480	9160640	8436800	13423100	10120500	11299600	8293050	12057300	11547900	14244400	14104700	9944820	10865400	9060330	10070200	14542800	TRUE	9296639.177	8581084.918	9006610.27	12573877.04	10804025.13	10584721.93	8853151.586	11294485.45	12327829.83	13343216.85	15057312.71	9315653.155	11599234.69	8487121.109	10750327.94	13622738.34	9327371.758	10821452.34	10210767.72	12975814.15	13692973.04	8580917.638	13057818.23	11782356.58	10679305.49
UBR4	Q5T4S7|Q5T4S7-2|Q5T4S7-3|Q5T4S7-4	E3 ubiquitin-protein ligase UBR4 OS=Homo sapiens GN=UBR4 PE=1 SV=1|Isoform 2 of E3 ubiquitin-protein ligase UBR4 OS=Homo sapiens GN=UBR4|Isoform 3 of E3 ubiquitin-protein ligase UBR4 OS=Homo sapiens GN=UBR4|Isoform 4 of E3 ubiquitin-protein ligase UBR4 OS=Homo sapiens GN=UBR4	1	8	2	4	6.26443	16012700	14080600	12600900	12069800	13896500	17176100	10051200	13197000	19511000	21136700	19270000	8714660	19244500	18339200	12992300	15191600	TRUE	15722356.49	14340625.33	12372419.51	12292692.04	13644527.59	17493289.68	9868950.865	13440707.96	19157225.04	21527029.77	18920594.87	8875592.937	18895557.24	18677868.56	12756722.61	15472142.08	15774331.03	18084705.49	14026575.8	12685640.78	17293013.13	14181617.51	14556055.58	14021286.28	16595447.96
LGALS1	P09382	Galectin-1 OS=Homo sapiens GN=LGALS1 PE=1 SV=2	1	8	2	8	7.91667	53179500	70638900	39466400	81380500	62460100	58346200	28539400	67079100	69391500	70119100	72701700	53029800	101979000	83031300	57494600	95443100	TRUE	59475476.25	63161182.05	44138868.09	72765693.91	69854816.12	52169767.08	31918209.21	59978216.63	77606831.77	62696407.22	81308929.79	47416152.45	114052399.7	74241742.93	64301445.42	85339650.17	59672088.69	79651434.29	50040105.64	75091725.28	88533680.96	42293456.29	47077266.23	62569006.66	67228950.71
RRM1	P23921	Ribonucleoside-diphosphate reductase large subunit OS=Homo sapiens GN=RRM1 PE=1 SV=1	1	8	2	8	7.0458	45416700	31990900	25807300	19729600	35305700	50865500	20607600	28800100	49082900	36441700	41395500	16153600	48334200	53308300	32476500	27832500	TRUE	42097426.56	34513299.91	23921176.93	21285228.04	32725387.64	54876113.41	19101496.31	31070913.56	45495682.82	39315034	38370115.42	17427269.67	44801701.46	57511521.88	30102959.34	30027020.8	42236591.1	43524103.74	27119368.31	21965632.58	41476009.66	44487461.49	28173454.88	32413037.71	39411826.87
LRP1	Q07954	Prolow-density lipoprotein receptor-related protein 1 OS=Homo sapiens GN=LRP1 PE=1 SV=2	1	8	2	5	6.60609	17408400	11516400	18382400	19678000	12257500	27244000	12415500	17783600	18684500	18668900	33991100	13439700	16696700	15325900	19793800	21504600	TRUE	17279905.77	11602036.52	18246716.52	19824326.58	12167025.4	27446587.73	12323859.17	17915839.73	18546586.67	18807722.86	33740206.16	13539638.27	16573458.94	15439864.15	19647698.74	21664509.27	17337029.22	14631120.25	20686249.14	20458031.87	15420433.47	22250646.75	18176884.41	18689723.67	16066466.48
SRSF1	J3KTL2|Q07955	Serine/arginine-rich-splicing factor 1 OS=Homo sapiens GN=SRSF1 PE=1 SV=1|Serine/arginine-rich splicing factor 1 OS=Homo sapiens GN=SRSF1 PE=1 SV=2	1	8	2	6	7.18416	34080600	30051300	38487900	46966400	33209000	57664500	28779800	44235200	37340000	49612000	63344100	29260200	43723800	38078700	41626600	61592500	TRUE	35873460.74	28549415.47	40512613.32	44619143.48	34956008.92	54782580.72	30293804.26	42024441.64	39304326.33	47132523.39	66676410.75	27797852.55	46023955.64	36175627.23	43816429.31	58514269.67	35992050.27	36003155.99	45929031.21	46045440.98	44303089.08	44411635.57	44681375.4	43839709.09	34048402.15
RAB14	P61106|X6RFL8	Ras-related protein Rab-14 OS=Homo sapiens GN=RAB14 PE=1 SV=4|Ras-related protein Rab-14 (Fragment) OS=Homo sapiens GN=RAB14 PE=1 SV=1	1	8	2	2	6.30281	9056050	8403050	11124700	13265600	10099300	13257700	7461860	12871300	12280500	11961000	18897200	8208350	12285800	10008700	12281200	16241800	TRUE	9131517.61	8333602.825	11217406.48	13155966.18	10183461.42	13148131.47	7524042.601	12764924.88	12382838.21	11862148.08	19054677.77	8140511.927	12388182.38	9925982.899	12383544.05	16107569.32	9161704.337	10509357.11	12717140.91	13576510.38	12906473.38	10659045.55	11097469.61	13316312.4	10726957.94
RNPEP	Q9H4A4	Aminopeptidase B OS=Homo sapiens GN=RNPEP PE=1 SV=2	1	8	2	3	5.686	7304730	5389320	4677140	4503430	5476930	7825700	3078210	4755920	10299000	7567960	7929300	3790310	8702720	9236170	7477450	6843410	TRUE	7024717.117	5604144.171	4497850.765	4682941.63	5266982.341	8137640.934	2960212.695	4945496.156	9904207.491	7869627.137	7625345.418	3941395.889	8369117.838	9604333.806	7190816.225	7116195.784	7047939.239	7067285.74	5099200.255	4832636.748	6675349.82	6597095.989	4366119.671	5159119.416	8579779.152
FAHD1	Q6P587|Q6P587-2|Q6P587-3	Acylpyruvase FAHD1, mitochondrial OS=Homo sapiens GN=FAHD1 PE=1 SV=2|Isoform 2 of Acylpyruvase FAHD1, mitochondrial OS=Homo sapiens GN=FAHD1|Isoform 3 of Acylpyruvase FAHD1, mitochondrial OS=Homo sapiens GN=FAHD1	1	8	2	2	5.76016	5528090	4874540	5695500	6552160	4195890	5230170	2629370	6260260	7685010	6143580	11583800	4845220	7889020	6136250	7181290	8864670	TRUE	5516346.699	4884917.011	5683401.071	6566108.359	4186976.687	5241304.082	2623784.439	6273586.957	7668684.762	6156658.566	11559192.58	4855534.594	7872261.385	6149312.962	7166034.813	8883541.273	5534582.491	6160281.263	6443255.169	6776000.867	5306555.492	4249067.564	3869910.049	6544577.785	6643199.035
HLA-C	A0A140T912|A0A140T930|A0A140T937|A0A140T9M5|P30504|P30508|P30510|Q95604	HLA class I histocompatibility antigen, Cw-6 alpha chain OS=Homo sapiens GN=HLA-C PE=1 SV=1|HLA class I histocompatibility antigen, Cw-6 alpha chain OS=Homo sapiens GN=HLA-C PE=1 SV=1|HLA class I histocompatibility antigen, Cw-6 alpha chain OS=Homo sapiens GN=HLA-C PE=1 SV=1|HLA class I histocompatibility antigen, Cw-6 alpha chain (Fragment) OS=Homo sapiens GN=HLA-C PE=1 SV=1|HLA class I histocom…	1	8	2	3	6.55997	11155400	8364630	12468100	11545600	9381960	16979400	9061830	10433700	14980100	12097200	22342900	9106990	11846100	14189000	16706300	17277200	TRUE	10793452.76	8645129.191	12063560.99	11932769.72	9077553.654	17548786.57	8767810.567	10783583.31	14494056.84	12502867.05	21617964	9412383.463	11461742.36	14664813.4	16164248.69	17856572.98	10829133.46	10902217.43	13676423.81	12314213.16	11504850.83	14226608.23	12931945.82	11249385.76	12555856.37
PDIA6	Q15084|Q15084-2|Q15084-3|Q15084-4|Q15084-5	Protein disulfide-isomerase A6 OS=Homo sapiens GN=PDIA6 PE=1 SV=1|Isoform 2 of Protein disulfide-isomerase A6 OS=Homo sapiens GN=PDIA6|Isoform 3 of Protein disulfide-isomerase A6 OS=Homo sapiens GN=PDIA6|Isoform 4 of Protein disulfide-isomerase A6 OS=Homo sapiens GN=PDIA6|Isoform 5 of Protein disulfide-isomerase A6 OS=Homo sapiens GN=PDIA6	1	8	2	11	7.93848	107722000	92298300	192366000	163679000	80644400	199267000	94363400	115525000	140578000	111969000	253352000	108417000	137644000	107903000	161560000	192864000	TRUE	105379605.3	94349921.33	188183037.4	167317282.9	78890802.66	203696338.7	92311485.58	118092908.1	137521157.8	114457864.8	247842908.3	110826910.4	134650957.1	110301485.1	158046908.1	197151011.7	105727966.4	118982994.2	213342559.1	172665754.5	99985849.8	165134381	136153389.9	123193992.3	119131304.9
FUBP1	E9PEB5|Q96AE4|Q96AE4-2	Far upstream element-binding protein 1 OS=Homo sapiens GN=FUBP1 PE=1 SV=1|Far upstream element-binding protein 1 OS=Homo sapiens GN=FUBP1 PE=1 SV=3|Isoform 2 of Far upstream element-binding protein 1 OS=Homo sapiens GN=FUBP1	1	8	2	3	6.09641	11054500	7719970	9095470	9670620	8480080	12851500	6979910	10106500	13068100	13796300	16314100	8452380	14917600	13472700	13146600	14485400	TRUE	10971845.56	7778127.016	9027463.217	9743471.89	8416674.485	12948314.48	6927721.248	10182635.51	12970389.88	13900231.96	16192119.56	8516054.496	14806061.18	13574194.18	13048302.94	14594523.18	11008115.99	9808856.53	10234408.64	10054932.14	10667255.53	10497056.12	10217934.7	10622479.71	11235939.96
FKBP4	Q02790	Peptidyl-prolyl cis-trans isomerase FKBP4 OS=Homo sapiens GN=FKBP4 PE=1 SV=3	1	8	2	7	7.20803	44281600	28940600	30028400	22642300	31859000	57722000	24057000	28231700	46875100	30164000	47149200	16499900	43481300	48746100	30394700	27171700	TRUE	40465509.77	31669836.37	27440618.98	24777576.69	29113461.93	63165459.42	21983821.01	30894083.72	42835507.68	33008608.81	43085986.35	18055919.13	39734177.85	53343089.31	27775352.06	29734120.68	40599279.57	39938262.85	31109349.47	25569617.8	36898271.2	51207543.11	32424694.87	32228569.62	37107380.49
RARS	P54136	Arginine--tRNA ligase, cytoplasmic OS=Homo sapiens GN=RARS PE=1 SV=2	1	8	2	11	7.22115	67892300	52269400	48180800	51625600	52633000	78822900	38424200	55456100	70324000	70136200	79962400	41098400	92332600	84396600	67868200	89287500	TRUE	68294357.69	51961683.3	48466126.34	51321673.44	52944692.23	78358859.42	38651747.82	55129622.79	70740458.2	69723299.15	80435936.73	40856448.42	92879392.96	83899746.33	68270114.97	88761852.97	68520123.35	65527947.22	54945905.65	52962224.3	67101865.7	63524665.37	57008794.27	57510975.31	61280774.76
AKR1A1	P14550	Alcohol dehydrogenase [NADP(+)] OS=Homo sapiens GN=AKR1A1 PE=1 SV=3	1	8	2	4	6.4238	24597200	14389200	13780600	11081200	14261700	30129900	11456800	14420600	27233800	16667800	22301600	9991880	18891700	25801200	18615000	14705200	TRUE	23115473.75	15311562.9	12950461.74	11791516.61	13402580.45	32061258.38	10766646.59	15344975.67	25593245.94	17736223.56	20958159.84	10632370.05	17753670.96	27455084.14	17493639.27	15647818.83	23191888.26	19309137.46	14681900.59	12168444.75	16986370.41	25991709.48	15880097.93	16007809.82	22170819.63
HADH	A0A0A0MSE2|E9PF18|Q16836|Q16836-2|Q16836-3	Hydroxyacyl-coenzyme A dehydrogenase, mitochondrial OS=Homo sapiens GN=HADH PE=1 SV=1|Hydroxyacyl-coenzyme A dehydrogenase, mitochondrial OS=Homo sapiens GN=HADH PE=1 SV=1|Hydroxyacyl-coenzyme A dehydrogenase, mitochondrial OS=Homo sapiens GN=HADH PE=1 SV=3|Isoform 2 of Hydroxyacyl-coenzyme A dehydrogenase, mitochondrial OS=Homo sapiens GN=HADH|Isoform 3 of Hydroxyacyl-coenzyme A dehydrogenase, m…	1	8	2	2	6.18319	12750600	8960700	15125700	16161500	9295940	14795000	9995850	15446500	14150800	13578400	27374700	10496000	15290300	15323200	17565700	21872900	TRUE	12619757.02	9053605.486	14970484.43	16329064.14	9200547.747	14948396.13	9893275.472	15606650.95	14005588.57	13719182.29	27093788.73	10604823.64	15133395.35	15482072.56	17385445.86	22099680.54	12661475.08	11417339.56	16971994.41	16851039.72	11660732.99	12118500.3	14591932.78	16280788.29	12132707.94
MARS	P56192	Methionine--tRNA ligase, cytoplasmic OS=Homo sapiens GN=MARS PE=1 SV=2	1	8	2	8	6.78466	45515800	36341700	34078000	36866900	34849400	54936100	26959300	39143200	48242400	42564200	57276500	27119000	60627800	53888800	48261700	58791100	TRUE	45198986.49	36596430.08	33840799.49	37125311.37	34606830.15	55321163.91	26771649.33	39417566.65	47906607.95	42862545.48	56877825.94	27309085.36	60205799.16	54266523.07	47925773.61	59203184.79	45348404.09	46151101.85	38365215.4	38312060.7	43860541.47	44848259.04	39486427.77	41120228.79	41500353.91
VARS2	A0A0A0MTG1|A0A0G2JIA5|A0A0G2JL52|A0A140T8Y0|A0A140TA35|A0A140TA36|A0A140TA40|A0A140TA45|B4E0K6|B7ZL25|Q5ST30|Q5ST30-3|Q5ST30-4	Valine--tRNA ligase, mitochondrial OS=Homo sapiens GN=VARS2 PE=1 SV=1|Valine--tRNA ligase, mitochondrial OS=Homo sapiens GN=VARS2 PE=1 SV=1|Valine--tRNA ligase, mitochondrial OS=Homo sapiens GN=VARS2 PE=1 SV=1|Valine--tRNA ligase, mitochondrial OS=Homo sapiens GN=VARS2 PE=1 SV=1|Valine--tRNA ligase, mitochondrial OS=Homo sapiens GN=VARS2 PE=1 SV=1|Valine--tRNA ligase, mitochondrial OS=Homo sapien…	1	8	2	3	6.11578	9698550	7640680	8800840	11839100	6817160	8647410	5765130	9512530	13838600	13316600	17686400	8141760	11829700	10492600	12487200	12895100	TRUE	9634888.782	7691164.754	8743071.345	11917325.24	6772412.207	8704546.586	5727287.725	9575382.749	13747763.52	13404587.62	17570306.59	8195555.572	11752049.93	10561928.43	12405234.1	12980302.62	9666739.54	9699189.98	9911994.408	12298274.99	8583324.886	7056680.165	8447373.949	9988996.35	11909360.23
RSF1	Q96T23|Q96T23-2	Remodeling and spacing factor 1 OS=Homo sapiens GN=RSF1 PE=1 SV=2|Isoform 2 of Remodeling and spacing factor 1 OS=Homo sapiens GN=RSF1	1	8	2	2	5.75803	2062580	1573750	2100130	2349060	962072	777048	896224	1590120	2801470	2064570	5551490	2101250	2638770	1692120	3519590	4551140	TRUE	1906055.549	1702985.664	1940755.965	2541963.784	889062.5691	840858.8433	828211.6223	1720699.962	2588872.886	2234111.589	5130200.195	2273803.735	2438519.815	1831076.157	3252496.411	4924877.634	1912356.536	2147604.689	2200229.361	2623220.31	1126793.916	681675.0146	1221557.85	1795026.485	2242678.946
SND1	Q7KZF4	Staphylococcal nuclease domain-containing protein 1 OS=Homo sapiens GN=SND1 PE=1 SV=1	1	8	2	12	7.29052	74168600	70467400	76767000	102342000	72944200	79066000	56948900	96126600	83868300	91679600	120166000	66317000	107310000	88112900	91019900	130543000	TRUE	76516270.66	68305320.67	79196918.23	99201944.84	75253114.53	76640098.6	58751512.72	93177245.61	86522996.83	88866688.38	123969633.8	64282263.16	110706700.7	85409421.8	93900967.58	126537682.3	76769216.1	86138615.28	89785314.54	102373038.6	95375460.17	62131284.87	86654629.87	97202084.85	74952812.23
DDX6	P26196	Probable ATP-dependent RNA helicase DDX6 OS=Homo sapiens GN=DDX6 PE=1 SV=2	1	8	2	7	6.81091	34056400	30690100	27668500	33325200	28463500	41494100	23306500	30454800	37670300	36187900	49299700	23631800	44425400	38507000	37810600	46875000	TRUE	34105035.73	30646334.16	27708013.21	33277676.36	28504148.55	41434927.04	23339783.87	30411369.71	37724096.72	36136293.98	49370104.6	23598099.7	44488843.64	38452086.81	37864597.08	46808153.57	34217779.25	38647542.56	31412493.53	34341432.02	36126030.15	33590839.55	34424651.19	31725004.53	32679486.86
DDX23	Q9BUQ8	Probable ATP-dependent RNA helicase DDX23 OS=Homo sapiens GN=DDX23 PE=1 SV=3	1	8	2	3	6.28954	14662300	13320800	15757300	20585900	14080300	17406800	10643200	16898800	18457600	19298200	28910800	14275600	19881700	18423500	19215100	26378100	TRUE	15057261.47	12971387.01	16181757.72	20045918.85	14459584.02	16950208.65	10929898.13	16455533.81	18954796.27	18791996.03	29689576.33	13901142	20417257.55	17940239.97	19732701.21	25686185.79	15107037.36	16357983.6	18345211.39	20686707.57	18326011.99	13741347.7	16120883.24	17166339.09	16420088.74
PRPF19	Q9UMS4	Pre-mRNA-processing factor 19 OS=Homo sapiens GN=PRPF19 PE=1 SV=1	1	8	2	6	7.42254	38507200	33262300	37202200	49503500	34148500	43916800	29996600	41082100	46725800	44341600	65370600	33382700	46821100	44926600	45807200	53809300	TRUE	38750112.41	33053788.98	37436880.16	49193177.95	34363916.71	43641499.23	30185825.56	40824569.09	47020557.26	44063636.29	65782973.01	33173434.23	47116458.43	44644969.11	46096162.51	53471986.23	38878211.49	41683540.68	42442081.53	50765689.24	43552674.07	35379683.36	44522113.9	42588007.43	40732789.29
DDX18	Q9NVP1	ATP-dependent RNA helicase DDX18 OS=Homo sapiens GN=DDX18 PE=1 SV=2	1	8	2	4	6.56017	16410000	13471600	19522600	22595000	16330200	19367900	13615900	21537100	20111500	21415400	31259900	14309300	21823200	19527800	19199100	26643000	TRUE	16488039.15	13407837.89	19615441.38	22488056.14	16407859.65	19276230.25	13680651.57	21435163.26	20207141.94	21314039.28	31408559.1	14241572.99	21926982.08	19435373.43	19290402.95	26516896.65	16542544.87	16908383.98	22237968.51	23206910.33	20795247.8	15627027.82	20178064.24	22361066.21	17504965.98
ECH1	Q13011	Delta(3,5)-Delta(2,4)-dienoyl-CoA isomerase, mitochondrial OS=Homo sapiens GN=ECH1 PE=1 SV=2	1	8	2	4	7.3647	14449400	9120930	16841200	15022400	10387600	18666400	71322800	72995300	16296500	19818000	55966600	19771400	13684200	13766900	17500800	19813500	TRUE	13848330.08	9516812.871	16140635.36	15674429	9955493.898	19476592.38	68355895.51	76163572.2	15618593.93	20678176.18	53638486.73	20629553.57	13114961.07	14364435.55	16772797.14	20673480.86	13894109.52	12001482.09	18298591.09	16175478.48	12617548.36	15789459.2	100820464.9	79453497.02	13530016.08
DDX56	F8WDT8|G3V0G3|Q9NY93|Q9NY93-2	Probable ATP-dependent RNA helicase DDX56 OS=Homo sapiens GN=DDX56 PE=1 SV=1|DEAD (Asp-Glu-Ala-Asp) box polypeptide 56, isoform CRA_a OS=Homo sapiens GN=DDX56 PE=1 SV=1|Probable ATP-dependent RNA helicase DDX56 OS=Homo sapiens GN=DDX56 PE=1 SV=1|Isoform 2 of Probable ATP-dependent RNA helicase DDX56 OS=Homo sapiens GN=DDX56	1	8	2	2	6.30963	9441830	6454610	9318380	10428300	7217180	9121920	6638350	9269310	11460700	10488100	17139500	7090530	11219600	11518000	11568300	12978400	TRUE	9134306.493	6671916.514	9014877.3	10779388.22	6982114.075	9429026.492	6422136.758	9581378.652	11087421.23	10841201.5	16581260.85	7329245.95	10854173.94	11905775.01	11191516.67	13415342.1	9164502.439	8413834.298	10220140.02	11123962.62	8849100.094	7644008.056	9472230.722	9995251.25	9604769.047
GNL2	Q13823	Nucleolar GTP-binding protein 2 OS=Homo sapiens GN=GNL2 PE=1 SV=1	1	8	2	3	6.30114	12311800	8341050	12913900	14701300	12835400	15188500	9662500	15161100	11926400	14903900	20807800	11323200	12616500	12924500	14117900	18635000	TRUE	12525383.9	8198817.713	13137929.07	14450612.19	13058067.26	14929504.42	9830124.104	14902571.65	12133298.02	14649757.44	21168771.68	11130115.84	12835369.81	12704110.34	14362815.95	18317234.41	12566789.98	10339382.02	14894431.76	14912541.1	16549735.94	12103185	14498788.65	15546295.92	10510787.21
PPID	Q08752	Peptidyl-prolyl cis-trans isomerase D OS=Homo sapiens GN=PPID PE=1 SV=3	1	8	2	2	6.64466	22762500	15185600	14271000	10778200	15732400	31151100	12484600	15153500	23483200	20519000	23164200	9213290	21828400	29611300	16652500	14513100	TRUE	21790742.83	15862801.13	13661754.68	11258853.33	15060765.84	32540281.87	11951618.14	15829269.63	22480675.32	21434043.86	22175293.8	9624156.242	20896520.63	30931814.56	15941585.72	15160311.02	21862778.08	20004294.11	15488291.32	11618754.33	19087947.15	26380048.56	17627853.28	16513023.11	19474473.82
XPO7	E7ESC6|Q9UIA9	Exportin-7 OS=Homo sapiens GN=XPO7 PE=1 SV=1|Exportin-7 OS=Homo sapiens GN=XPO7 PE=1 SV=3	1	8	2	4	6.17612	18669200	12281800	11970500	11189300	13081400	18217400	9456460	13191600	21495200	21794500	21332500	7545460	21528600	22741400	15467700	16237400	TRUE	17820660.82	12866603.71	11426425.36	11722083.81	12486833.52	19084830.11	9026651.715	13819724.27	20518215.48	22832255.41	20362910.4	7904740.642	20550097.4	23824242.5	14764673.12	17010551.47	17879571.88	16225843.26	12954105	12096792.45	15825756.86	15471861.83	13313719.55	14416674.39	17774441.57
FUCA1	P04066	Tissue alpha-L-fucosidase OS=Homo sapiens GN=FUCA1 PE=1 SV=4	1	8	2	3	6.36159	12418500	8624280	11006700	10011100	8831210	13944700	7524160	12019800	13965100	9732560	19357500	8657210	12110000	12037800	13438700	14358700	TRUE	11931782.74	8976078.72	10575315.31	10419469.41	8485089.108	14513527.5	7229266.212	12510107.63	13417766.98	10129567.3	18598823.08	9010351.989	11635373.76	12528841.88	12911998.13	14944415.25	11971226.51	11319571.95	11989204.03	10752538.63	10753963.92	11765957.09	10662693.76	13050488.18	11623492.08
NAGLU	P54802	Alpha-N-acetylglucosaminidase OS=Homo sapiens GN=NAGLU PE=1 SV=2	1	8	2	3	6.35431	11417400	7788370	12440400	11480500	8223250	14669500	9387920	11524400	14621100	11841100	19092300	7747710	10140700	11781200	13954100	13856900	TRUE	10963701.11	8110667.627	11946049.65	11955585.02	7896478.632	15276551.93	9014867.562	12001301.68	14040094.09	12331107.34	18333619.79	8068325.038	9737733.969	12268728.56	13399599	14430324.99	10999944.62	10228217.53	13543201.54	12337757.77	10007961.64	12384532.6	13296338.69	12519704.11	12162599.25
DDX3X	A0A0D9SF53|A0A0D9SFB3|A0A0D9SG12|O00571|O00571-2	ATP-dependent RNA helicase DDX3X OS=Homo sapiens GN=DDX3X PE=1 SV=1|ATP-dependent RNA helicase DDX3X OS=Homo sapiens GN=DDX3X PE=1 SV=1|ATP-dependent RNA helicase DDX3X OS=Homo sapiens GN=DDX3X PE=1 SV=1|ATP-dependent RNA helicase DDX3X OS=Homo sapiens GN=DDX3X PE=1 SV=3|Isoform 2 of ATP-dependent RNA helicase DDX3X OS=Homo sapiens GN=DDX3X	1	8	2	9	7.38496	39368200	32438400	32606800	44685100	32932300	45865500	25772200	36878400	39463900	36922200	56599300	28455400	48220700	51178600	38340300	50145200	TRUE	40326520.13	31667533.3	33400530.8	43623202.5	33733954.28	44775551.46	26399559.59	36002021.06	40424549.7	36044780.2	57977068.06	27779185.38	49394512.05	49962390.86	39273598.48	48953548.59	40459830.46	39935358.49	37866084.06	45017663.71	42754262.5	36299047.03	38937619.81	37557146.95	35018824.99
HNRNPAB	A0A087WZV1|D6R9P3|D6RBZ0|D6RD18|Q99729-2|Q99729-3	Heterogeneous nuclear ribonucleoprotein A/B OS=Homo sapiens GN=HNRNPAB PE=1 SV=1|Heterogeneous nuclear ribonucleoprotein A/B OS=Homo sapiens GN=HNRNPAB PE=1 SV=1|Heterogeneous nuclear ribonucleoprotein A/B OS=Homo sapiens GN=HNRNPAB PE=1 SV=1|Heterogeneous nuclear ribonucleoprotein A/B OS=Homo sapiens GN=HNRNPAB PE=1 SV=1|Isoform 2 of Heterogeneous nuclear ribonucleoprotein A/B OS=Homo sapiens GN…	1	8	2	3	7.05269	22786700	22955400	30220100	34015900	21186400	35568100	20702300	28427600	25381800	24564500	47145300	21058600	30175800	20768900	29862400	34975500	TRUE	22654227.37	23089633.77	30044412.59	34214811.04	21063230.86	35776087.67	20581945.22	28593832.95	25234240.51	24708143.12	46871216.34	21181742.06	30000370.14	20890348.01	29688792.12	35180022.38	22729117.11	29117923.18	34061262.67	35308523.19	26695444.42	29003280.73	30357019.98	29828958.33	21859821.78
ESF1	A0A087WX71|Q9H501	ESF1 homolog OS=Homo sapiens GN=ESF1 PE=1 SV=1|ESF1 homolog OS=Homo sapiens GN=ESF1 PE=1 SV=1	1	8	2	2	6.01689	9810080	6895490	8121880	9921090	7993090	11129100	6259700	9445250	12432300	14676400	15437100	6957410	10856500	9081100	10452500	13531300	TRUE	9833711.455	6878919.404	8141444.758	9897248.565	8012344.517	11102355.59	6274778.962	9422552.059	12462248.11	14641131.05	15474286.36	6940690.603	10882652.17	9059277.15	10477678.98	13498782.85	9866219.476	8674881.931	9229932.107	10213624.45	10154809.54	9000557.547	9254887.632	9829564.06	10795748.84
RPS8	P62241|Q5JR95	40S ribosomal protein S8 OS=Homo sapiens GN=RPS8 PE=1 SV=2|40S ribosomal protein S8 OS=Homo sapiens GN=RPS8 PE=1 SV=1	1	8	2	4	6.35476	18890700	14315600	13885500	13757900	13190200	23879900	11172600	14324200	22820200	21381700	28078700	9842400	22954000	24269900	19352300	19405000	TRUE	18310111.08	14769528.36	13458741.47	14194144.45	12784810.9	24637099.41	10829220.04	14778401.06	22118841.38	22059684.86	27215726.05	10154489.22	22248529.16	25039465.78	18757524.22	20020306.37	18370640.16	18625587.42	15258135.83	14647875.09	16203412.04	19973025.48	15972389.67	15416761.72	19161025.69
RPL7	A8MUD9|P18124	60S ribosomal protein L7 OS=Homo sapiens GN=RPL7 PE=1 SV=1|60S ribosomal protein L7 OS=Homo sapiens GN=RPL7 PE=1 SV=1	1	8	2	2	6.32575	15196300	9484270	12093300	9299420	8781810	21061200	9467260	10740100	13262400	11942300	17822500	8172320	16016600	14794800	13668100	12985400	TRUE	14501891.6	9938414.672	11540685.93	9744713.317	8380517.404	22069694.25	9034645.159	11254378.82	12656362.87	12514144.95	17008085.06	8563643.274	15284707.26	15503234.03	13043524.05	13607192.74	14549831.56	12533156.56	13083641.88	10056213.25	10621430.21	17891658.36	13325509.35	11740517.52	10963905.83
HAT1	O14929	Histone acetyltransferase type B catalytic subunit OS=Homo sapiens GN=HAT1 PE=1 SV=1	1	8	2	2	6.30543	12409900	8613360	7796660	7818970	8627840	13397800	7139840	8147580	14010600	11546700	12467900	5427660	14053100	14263800	10591400	8175610	TRUE	11614920.25	9202898.857	7297204.981	8354137.07	8075139.486	14314808.43	6682460.953	8705238.684	13113079.2	12337010.44	11669204.76	5799154.57	13152856.65	15240081.54	9912913.585	8735187.189	11653316.54	11605610.75	8272819.941	8621185.783	10234395.6	11604857.72	9856191.844	9081265.963	11359548.32
WDR61	H0YMF9|H0YN81|Q9GZS3	WD repeat-containing protein 61 OS=Homo sapiens GN=WDR61 PE=1 SV=1|WD repeat-containing protein 61 (Fragment) OS=Homo sapiens GN=WDR61 PE=1 SV=1|WD repeat-containing protein 61 OS=Homo sapiens GN=WDR61 PE=1 SV=1	1	8	2	2	5.9633	11639700	7881470	7464300	8747970	7792110	12507000	5881340	9809130	15122700	11602600	16615500	6793460	13757700	14262300	10963700	14182200	TRUE	11558191.71	7937050.076	7412030.409	8809660.629	7737544.883	12595199.28	5840155.262	9878303.922	15016801.61	11684421.46	16499148.11	6841367.437	13661360.18	14362877.65	10886925.47	14282212.78	11596400.47	10009271.55	8402997.193	9091270.627	9806529.715	10210789.51	8613846.167	10305002.36	13008697.72
LSS	P48449|P48449-2|P48449-3	Lanosterol synthase OS=Homo sapiens GN=LSS PE=1 SV=1|Isoform 2 of Lanosterol synthase OS=Homo sapiens GN=LSS|Isoform 3 of Lanosterol synthase OS=Homo sapiens GN=LSS	1	8	2	4	6.37684	13008300	12475200	14606800	21281500	16155700	12401700	11133300	21661000	16374500	17593300	25899500	15064700	23528900	16070300	17646800	29656000	TRUE	13340454.86	12164588.53	14979771.07	20751626.49	16568220.79	12092918.56	11417578.47	21121677.58	16792607.65	17155256.46	26560819.68	14689614.34	24129688.61	15670176.6	18097394.65	28917615.55	13384555.38	15340544.5	16982522.64	21414973.9	20998488.8	9803596.049	16840179.78	22034039.35	14547036.21
PSMD2	Q13200	26S proteasome non-ATPase regulatory subunit 2 OS=Homo sapiens GN=PSMD2 PE=1 SV=3	1	8	2	13	7.44793	95584900	92520300	69248700	76619100	95597200	118375000	60963500	89603700	103347000	94942500	106805000	55160000	127035000	107450000	79069700	99854300	TRUE	95511736.37	92591172.14	69195694.91	76677791.55	95524026.95	118465677.3	60916836.65	89672337.98	103267895	95015227.59	106723248.2	55202253.51	126937763.5	107532308.6	79009177.61	99930790.11	95827476.51	116765067.2	78446956.9	79128877.2	121066723.7	96038821.43	89848340.73	93545780.91	89458518.87
EXOSC7	Q15024	Exosome complex component RRP42 OS=Homo sapiens GN=EXOSC7 PE=1 SV=3	1	8	2	2	6.0786	6003840	4514330	5014850	7043960	4761300	5549450	3699190	6619490	7890480	8296040	10369500	5028580	7819370	6599300	7557380	9097680	TRUE	6053558.276	4477253.508	5056378.371	6986107.489	4800728.703	5503871.999	3729823.286	6565123.69	7955821.691	8227904.073	10455370.65	4987279.939	7884122.824	6545099.511	7619963.264	9022960.151	6073569.967	5646184.129	5732401.368	7209425.708	6084422.048	4461928.486	5501244.842	6848707.597	6891938.92
EIF3B	P55884|P55884-2	Eukaryotic translation initiation factor 3 subunit B OS=Homo sapiens GN=EIF3B PE=1 SV=3|Isoform 2 of Eukaryotic translation initiation factor 3 subunit B OS=Homo sapiens GN=EIF3B	1	8	2	10	6.81974	60775000	48806100	42271900	53603700	44833200	64705000	29173200	45377800	62043800	50331100	79707600	38447400	77731900	68295400	62815700	67964300	TRUE	60162371.72	49303088.34	41845787.92	54149541.89	44381269.33	65363885.47	28879126.33	45839878.25	61418381.88	50843617.28	78904126.04	38838906.58	76948341.63	68990846.21	62182500.92	68656374.65	60361254.88	62175240.77	47440447.36	55880488.52	56248621.9	52989782.94	42594818.2	47819955.46	53205281.98
EEF2	P13639	Elongation factor 2 OS=Homo sapiens GN=EEF2 PE=1 SV=4	1	8	2	21	8.11522	206578000	120154000	129341000	76394600	125171000	261765000	120295000	117058000	204252000	140217000	183876000	65365700	168443000	223841000	148875000	109311000	TRUE	184678862.9	134401807.7	115629683.7	85453437.55	111901741.5	292804976.8	107542641.6	130938685.4	182599440	156843869.2	164383480.3	73116735.51	150586518	250383965.8	133092903	122273049.6	185289369.4	169491710	131089034.2	88185045.89	141823765.7	237373773.8	158618346.5	136594649.5	158181547.5
CDK5RAP3	Q96JB5|Q96JB5-4	CDK5 regulatory subunit-associated protein 3 OS=Homo sapiens GN=CDK5RAP3 PE=1 SV=2|Isoform 4 of CDK5 regulatory subunit-associated protein 3 OS=Homo sapiens GN=CDK5RAP3	1	8	2	4	6.07284	14902700	11627500	13553000	20056700	12420200	15148500	10123400	16041100	17159000	16728900	27363100	13228700	18877700	14439500	18315300	23125400	TRUE	14917290.46	11616127.26	13566269.04	20037082.74	12432359.97	15133683.4	10133311.29	16025410.36	17175799.48	16712537.63	27389889.78	13215761.14	18896182.17	14425376.87	18333231.56	23102781.27	14966603.64	14648889.82	15380039.52	20677589	15756717.32	12268710.66	14945969.88	16717636.23	14878986.17
INTS3	Q68E01|Q68E01-2	Integrator complex subunit 3 OS=Homo sapiens GN=INTS3 PE=1 SV=1|Isoform 2 of Integrator complex subunit 3 OS=Homo sapiens GN=INTS3	1	8	2	2	6.22653	4568970	5155930	4862740	6216340	4523680	5279190	4174220	5869940	6083210	6428050	7958510	4260860	6669040	5927990	6595630	8857790	TRUE	4704959.503	5006905.899	5007473.189	6036666.405	4658321.505	5126603.261	4298460.278	5700278.556	6264268.905	6242257.258	8195384.793	4137706.499	6867535.38	5756650.711	6791940.426	8601769.42	4720513.033	6314119.263	5676957.706	6229634.748	5903935.803	4156080.87	6339947.13	5946505.031	5426587.014
ANXA1	P04083	Annexin A1 OS=Homo sapiens GN=ANXA1 PE=1 SV=2	1	8	2	8	7.05651	41450200	27487200	27447600	20256900	32688500	56487600	21890300	31211000	52669800	43295500	42947700	27276700	48460000	65845000	31605000	34042400	TRUE	41238521.86	27628292.34	27307430.42	20360879.07	32521566.16	56777551.96	21778510.48	31371206.68	52400825.53	43517736.65	42728374.41	27416711.84	48212524.16	66182983.68	31443599.39	34217140.31	41374847.06	34841544.13	30958353.99	21011735.82	41217687.23	46028936.81	32121875.29	32726302.15	45393587.61
HSP90B1	P14625	Endoplasmin OS=Homo sapiens GN=HSP90B1 PE=1 SV=1	1	8	2	24	8.52953	277192000	194565000	335348000	391217000	184231000	342857000	186534000	244007000	274055000	241304000	598692000	247286000	269891000	235759000	350210000	386616000	TRUE	271059952	198966542.6	327929423.6	400067298.2	180155437.5	350613275.1	182407490.4	249527043.1	267992348.8	246762894.6	585447721.4	252880222.2	263920464.9	241092452.9	342462646.1	395362212.2	271956014.8	250913139.6	371772628.3	412855867	228328194.2	284238325.3	269039090.9	260305492.6	232155391.5
ETHE1	M0QXB5|O95571	Persulfide dioxygenase ETHE1, mitochondrial OS=Homo sapiens GN=ETHE1 PE=1 SV=1|Persulfide dioxygenase ETHE1, mitochondrial OS=Homo sapiens GN=ETHE1 PE=1 SV=2	1	8	2	2	7.04322	9973020	6784710	11236400	11151500	7793030	13277100	8243710	10584300	11389400	9742180	20074800	7866320	10107600	10173200	12955800	14770800	TRUE	9626644.65	7028829.98	10846145.9	11552741.02	7522368.405	13754822.02	7957395.73	10965132.65	10993832.02	10092712.42	19377577.3	8149357.283	9756550.519	10539240.9	12505829	15302266.7	9658468.154	8863931.472	12296243.87	11922036.45	9533816.011	11150882.91	11736637.06	11438777.22	9523694.936
PDCD6IP	Q8WUM4	Programmed cell death 6-interacting protein OS=Homo sapiens GN=PDCD6IP PE=1 SV=1	1	8	2	16	7.12065	102057000	66096400	73417000	50774000	73941000	116853000	56660600	70938900	116747000	92020400	99273200	37298400	98554300	115569000	70199000	62382500	TRUE	94113306.95	71675308.34	67702525.61	55059611.5	68185739.63	126716051.2	52250374.2	76926542.61	107659898.4	99787439.91	91546186.39	40446594.98	90883242.58	125323674.4	64735001.37	67647934.27	94424424.21	90388446.31	76754155.25	56819649.46	86418300.89	102727308.8	77065876.73	80249424.33	93263206.8
NUP88	I3L245|Q99567	Nuclear pore complex protein Nup88 (Fragment) OS=Homo sapiens GN=NUP88 PE=1 SV=1|Nuclear pore complex protein Nup88 OS=Homo sapiens GN=NUP88 PE=1 SV=2	1	8	2	7	6.96653	48088200	40458800	42415400	55846800	40430500	51071800	35258800	45987600	48694100	52681300	68305600	35982700	54138600	49114400	47722600	63688400	TRUE	48786302.39	39879859.12	43031149.65	55047666.17	41017434.61	50340993.52	35770656.39	45329545.34	49400998.32	51927462.56	69297200.91	35467809.39	54924536.8	48411602.73	48415394.93	62777057.63	48947578.85	50291775.34	48784288.48	56807322.29	51985312.83	40810889.69	52759373.27	47287578.46	42794908.71
AP2M1	A0A087WY71|E9PFW3|Q96CW1|Q96CW1-2	AP-2 complex subunit mu OS=Homo sapiens GN=AP2M1 PE=1 SV=1|AP-2 complex subunit mu OS=Homo sapiens GN=AP2M1 PE=1 SV=1|AP-2 complex subunit mu OS=Homo sapiens GN=AP2M1 PE=1 SV=2|Isoform 2 of AP-2 complex subunit mu OS=Homo sapiens GN=AP2M1	1	8	2	4	6.62964	26622700	23104200	24444500	31409300	22439500	29092800	20507000	27703900	26613600	25577000	40950500	21608600	33408000	26834200	25068800	34212500	TRUE	26759945.04	22985704.36	24570516.01	31248209.58	22555179.86	28943590.33	20612717.45	27561813.65	26750798.13	25445821.99	41161607.55	21497774.91	33580224.54	26696574.12	25198034.39	34037032.68	26848407.35	28986859.67	27855522.13	32247091.23	28586333.89	23464250.3	30402407	28752360.42	23173579.54
SNRNP70	P08621|P08621-2	U1 small nuclear ribonucleoprotein 70 kDa OS=Homo sapiens GN=SNRNP70 PE=1 SV=2|Isoform 2 of U1 small nuclear ribonucleoprotein 70 kDa OS=Homo sapiens GN=SNRNP70	1	8	2	4	7.2787	29771300	27719500	29326200	42245400	28766600	38831000	24016200	36226900	29487000	33405300	44907500	26949500	37503300	30071300	29923400	44923700	TRUE	31306070.1	26360560.36	30838024.3	40174332.74	30249575.8	36927322.61	25254283.17	34450887.79	31007113.86	31767615.83	47222571.5	25628309.36	39436670.17	28597064.11	31466011.16	42721329.94	31409560.87	33242830.06	34960977.94	41458547.23	38338176.83	29936574.23	37248412.17	35939011.67	26860724.53
ARPC1B	O15143	Actin-related protein 2/3 complex subunit 1B OS=Homo sapiens GN=ARPC1B PE=1 SV=3	1	8	2	2	6.90805	15307900	9263610	11552100	11032500	10226600	18269200	9535110	10849400	14958800	13782300	16706200	7860620	13570900	15502000	11258600	13149300	TRUE	14942553.64	9490105.836	11276391.53	11302245.31	9982526.608	18715883.07	9307540.071	11114668.5	14601785.44	14119278.09	16307481.08	8052812.644	13247009.79	15881024.86	10989896.36	13470801.2	14991950.34	11967802.33	12784012.09	11663533.38	12651809.49	15172760.52	13728011.46	11594772.34	12649179.09
ARPC2	O15144	Actin-related protein 2/3 complex subunit 2 OS=Homo sapiens GN=ARPC2 PE=1 SV=1	1	8	2	4	6.76776	12341700	9697850	10927500	12070300	10677600	14768300	8387420	11920100	15567800	14854800	20478200	7848780	16232300	15101300	14853500	16975100	TRUE	12029175.22	9949805.63	10650786.54	12383893.22	10407214.67	15151988.79	8175028.143	12229790.94	15173581.76	15240736.11	19959637.33	8052695.745	15821254.85	15493640.32	14477369.74	17416122.7	12068940.95	12547521.49	12074765.54	12779757.3	13190057.25	12283550.64	12057630.61	12758063.08	13144512.63
CBX5	P45973	Chromobox protein homolog 5 OS=Homo sapiens GN=CBX5 PE=1 SV=1	1	8	2	3	6.82231	20305500	20016500	22739100	34560400	22159400	22513300	14632200	28290100	23456800	23837400	41114900	21839000	28809900	21064800	25386500	35189500	TRUE	20918999.19	19429468.74	23426126.64	33546834.43	22828911.9	21853044.16	15074289.23	27460425.82	24165510.83	23138311.8	42357122.94	21198519.61	29680346.45	20447024.86	26153513.72	34157484.58	20988152.66	24502154.68	26558131.25	34619194.01	28933260.66	17716022.51	22233588.44	28646593.09	20934006.71
KHSRP	A0A087WTP3|Q92945	Far upstream element-binding protein 2 OS=Homo sapiens GN=KHSRP PE=1 SV=1|Far upstream element-binding protein 2 OS=Homo sapiens GN=KHSRP PE=1 SV=4	1	8	2	4	6.67364	19311900	16095100	18536400	21542500	15432200	24479500	14143900	20324400	23021600	22967900	32573300	15759400	27938900	23671400	27818800	33215900	TRUE	19402850.73	16019654.33	18623698.46	21441519.68	15504879.01	24364752.51	14210511.68	20229129.51	23130021.82	22860238.13	32726706.21	15685527.92	28070480.18	23560440.48	27949814.56	33060200.7	19466992.15	20202098.87	21113632.46	22126920.24	19650814.19	19752236.84	20959573.17	21102937.21	20036987.23
BCCIP	Q9P287|Q9P287-2|Q9P287-3|Q9P287-4	BRCA2 and CDKN1A-interacting protein OS=Homo sapiens GN=BCCIP PE=1 SV=1|Isoform 2 of BRCA2 and CDKN1A-interacting protein OS=Homo sapiens GN=BCCIP|Isoform 3 of BRCA2 and CDKN1A-interacting protein OS=Homo sapiens GN=BCCIP|Isoform 4 of BRCA2 and CDKN1A-interacting protein OS=Homo sapiens GN=BCCIP	1	8	2	2	6.32055	6277770	3720830	3686530	4307160	4432310	6128290	2778270	4356830	7249440	5693410	7366660	3800690	6469400	6106050	4778230	5298080	TRUE	6103099.36	3827320.116	3583957.183	4430430.874	4308986.841	6303681.596	2700968.315	4481522.429	7047733.928	5856355.335	7161692.437	3909465.708	6289397.509	6280805.088	4645282.075	5449710.995	6123274.823	4826564.78	4063121.774	4572054.222	5461190.616	5110325.328	3983751.206	4675104.104	6105284.111
PHGDH	O43175	D-3-phosphoglycerate dehydrogenase OS=Homo sapiens GN=PHGDH PE=1 SV=4	1	8	2	4	6.58181	42469700	17687700	23231700	13060000	18566200	55477400	22175100	17565200	40528700	20227000	36739300	10006300	24008500	44041900	26174100	16022400	TRUE	36394490.54	20640248.06	19908449.69	15240061.72	15910340.55	64738055.13	19002994.3	20497299.55	34731146.88	23603424.84	31483813.31	11676617.89	20574129.93	51393665.71	22429944.99	18696965.15	36514802.47	26029046.78	22570151.18	15727226.2	20164694.33	52482429.16	28028170.87	21382690.99	30086765.67
FNTA	B3KVN2|P49354|P49354-2	Farnesyltransferase, CAAX box, alpha, isoform CRA_c OS=Homo sapiens GN=FNTA PE=1 SV=1|Protein farnesyltransferase/geranylgeranyltransferase type-1 subunit alpha OS=Homo sapiens GN=FNTA PE=1 SV=1|Isoform 2 of Protein farnesyltransferase/geranylgeranyltransferase type-1 subunit alpha OS=Homo sapiens GN=FNTA	1	8	2	3	5.97134	7646630	5983990	6509010	6854020	6169630	9851140	3803650	5758820	12338100	7793370	9566680	4558270	9767170	9332710	7031930	8443270	TRUE	7469886.16	6125576.277	6358561.054	7016191.925	6027025.467	10084226.33	3715732.616	5895078.564	12052917.75	7977767.742	9345556.216	4666122.533	9541412.099	9553529.832	6869394.306	8643044.927	7494579.91	7724854.421	7208682.067	7240471.824	7638625.072	8175171.353	5480462.027	6149719.526	10441155.69
UBE2I	B0QYN7|H3BPC4|H3BQQ9|P63279	SUMO-conjugating enzyme OS=Homo sapiens GN=UBE2I PE=1 SV=1|SUMO-conjugating enzyme UBC9 (Fragment) OS=Homo sapiens GN=UBE2I PE=1 SV=2|SUMO-conjugating enzyme (Fragment) OS=Homo sapiens GN=UBE2I PE=1 SV=1|SUMO-conjugating enzyme UBC9 OS=Homo sapiens GN=UBE2I PE=1 SV=1	1	8	2	2	6.1993	8785630	6316400	7282740	7328570	5886470	8789040	4030510	7726200	10265400	8853580	12005600	5580210	10813100	10058800	9356450	9934360	TRUE	8677251.058	6395291.892	7192900.608	7420103.904	5813854.901	8898815.187	3980789.899	7822700.306	10138766.71	8964161.293	11857499.72	5649906.872	10679710.32	10184434.5	9241029.46	10058440.24	8705936.082	8064987.947	8154570.378	7657295.272	7368453.651	7214171.583	5871404.145	8160605.885	8782972.223
PDE12	F6T1Q0|Q6L8Q7|Q6L8Q7-2	2',5'-phosphodiesterase 12 OS=Homo sapiens GN=PDE12 PE=1 SV=1|2',5'-phosphodiesterase 12 OS=Homo sapiens GN=PDE12 PE=1 SV=2|Isoform 2 of 2',5'-phosphodiesterase 12 OS=Homo sapiens GN=PDE12	1	8	2	3	6.30243	16863100	15887900	15608700	18356700	12720300	20196200	11262600	17232600	19892600	17707300	27161200	12026200	22910000	19772400	20634100	23652400	TRUE	16914153.57	15839944.07	15655955.83	18301292.26	12758811.11	20135239.93	11296697.88	17180585.24	19952825.47	17653852.41	27243431.39	11989900.2	22979360.75	19712719.12	20696570.39	23581007.76	16970067.92	19975469.48	17749111.33	18886312.17	16170460.03	16323417.52	16661888.82	17922709.49	17284657.67
EIF4A3	P38919	Eukaryotic initiation factor 4A-III OS=Homo sapiens GN=EIF4A3 PE=1 SV=4	1	8	2	9	7.41413	61330400	41265200	60627900	66764900	49838200	68747700	43762100	63041500	65170000	56709800	101505000	45143100	74803300	73055500	67959100	84163400	TRUE	59919948.9	42236538.39	59233604.7	68336473.88	48692041.75	70365946.86	42755677.37	64525429.06	63671247.37	58044687.65	99170630.11	46205719.98	73083004.73	74775147.84	66396204.8	86144515.85	60118030.66	53263741.33	67152964.38	70520920.61	61712075.54	57044899.08	63061821.33	67312638.28	55156885.72
APLP2	Q06481|Q06481-2|Q06481-3|Q06481-4|Q06481-5|Q06481-6	Amyloid-like protein 2 OS=Homo sapiens GN=APLP2 PE=1 SV=2|Isoform 2 of Amyloid-like protein 2 OS=Homo sapiens GN=APLP2|Isoform 3 of Amyloid-like protein 2 OS=Homo sapiens GN=APLP2|Isoform 4 of Amyloid-like protein 2 OS=Homo sapiens GN=APLP2|Isoform 5 of Amyloid-like protein 2 OS=Homo sapiens GN=APLP2|Isoform 6 of Amyloid-like protein 2 OS=Homo sapiens GN=APLP2	1	8	2	3	6.50268	22985100	19587000	22552400	29188000	19521200	30111600	14616100	21708000	29975500	20624900	42377600	20835000	26751700	23418200	27671800	32241100	TRUE	22788816.09	19755706.13	22359811.18	29439401.16	19354496.46	30370956.29	14491284.13	21894974.66	29719520.76	20802545.74	42015711.59	21014455.37	26523250.77	23619904.9	27435493.47	32518798.03	22864150.75	24913566.81	25349252.53	30380462.35	24529802.09	24621400.17	21373694.13	22840739.4	25745313.28
EIF3D	O15371|O15371-2|O15371-3	Eukaryotic translation initiation factor 3 subunit D OS=Homo sapiens GN=EIF3D PE=1 SV=1|Isoform 2 of Eukaryotic translation initiation factor 3 subunit D OS=Homo sapiens GN=EIF3D|Isoform 3 of Eukaryotic translation initiation factor 3 subunit D OS=Homo sapiens GN=EIF3D	1	8	2	5	7.29035	24303400	20065700	19509900	24203400	19845200	32301200	15075100	20757100	24235600	25519600	32084100	16842700	27917300	27355800	24432000	28170100	TRUE	24856709.32	19619038.35	19954076.93	23664633.31	20297010.62	31582176.62	15418310.97	20295047.81	24787365.74	24951534.76	32814550.54	16467782.19	28552886.07	26746861.02	24988237.13	27543034.74	24938879.97	24741217.52	22621878.65	24421098.02	25724340.31	25603323.17	22740997.95	21171702.88	21472704.81
LRPPRC	P42704	Leucine-rich PPR motif-containing protein, mitochondrial OS=Homo sapiens GN=LRPPRC PE=1 SV=3	1	8	2	17	8.13882	135240000	122976000	171688000	188286000	135739000	160875000	115432000	184975000	159079000	157471000	280303000	127299000	181952000	139444000	188029000	239207000	TRUE	133675395.4	124415373.5	169701725	190489794.8	134168622.4	162757962.6	114096556.1	187140041.2	157238599.7	159314120.4	277060147.6	128788972	179846979.8	141076123.3	185853674.4	242006800	134117295.9	156897996.9	192390349.2	196579000	170044710.9	131946089.9	168284940.7	195223651.9	136212055.4
GNPDA1	P46926|P46926-2	Glucosamine-6-phosphate isomerase 1 OS=Homo sapiens GN=GNPDA1 PE=1 SV=1|Isoform 2 of Glucosamine-6-phosphate isomerase 1 OS=Homo sapiens GN=GNPDA1	1	8	2	2	6.1382	11951700	6834670	9834970	6739560	7303390	15194900	7324650	8128520	13175300	10058200	12829100	5272580	10274700	13898500	9784640	8910190	TRUE	11192038.13	7298574.62	9209849.581	7197009.01	6839179.309	16226256.94	6859088.003	8680244.953	12337864.9	10740902.38	12013669.72	5630457.443	9621629.908	14841863.52	9162718.606	9514970.964	11229036.47	9204101.601	10441179.53	7427068.916	8667945.213	13154448.01	10116705.16	9055192.615	10687998.63
ARG1	P05089|P05089-2	Arginase-1 OS=Homo sapiens GN=ARG1 PE=1 SV=2|Isoform 2 of Arginase-1 OS=Homo sapiens GN=ARG1	1	8	2	3	6.33656	3769120	3781780	4493960	6034760	5556140	4813560	3243180	6004350	19734500	57300600	10128200	2776110	6194320	8908270	6902840	10479200	TRUE	4094051.125	3481632.788	4881378.675	5555801.312	6035127.886	4431523.866	3522770.495	5527804.852	21435786.58	52752843.31	11001339.46	2555779.448	6728324.586	8201250.448	7497925.21	9647500.996	4107585.13	4390624.689	5534004.725	5733398.301	7648894.041	3592587.65	5195855.548	5766581.237	18569311.58
DARS2	Q6PI48	Aspartate--tRNA ligase, mitochondrial OS=Homo sapiens GN=DARS2 PE=1 SV=1	1	8	2	2	6.98898	12876500	9338150	13680900	14827100	11478200	16654400	11940700	14673900	13139700	13251500	20776000	10697400	11714300	12086500	13672800	18227100	TRUE	12877270.44	9337591.3	13681718.57	14826212.9	11478886.78	16653403.57	11941414.45	14673022.06	13140486.19	13250707.17	20777243.1	10696759.98	11715000.91	12085776.87	13673618.09	18226009.48	12919839.78	11775468.98	15510924.33	15300148.27	14548289.67	13500731.08	17612803.51	15306830.83	11383290.34
ATIC	P31939|P31939-2	Bifunctional purine biosynthesis protein PURH OS=Homo sapiens GN=ATIC PE=1 SV=3|Isoform 2 of Bifunctional purine biosynthesis protein PURH OS=Homo sapiens GN=ATIC	1	8	2	4	6.619	23852100	16846600	15664900	13721400	17664200	31985300	12790600	15593100	26549600	20330100	25032900	9457230	23381000	27744700	17857800	15697800	TRUE	22566549.33	17806301.8	14820612.8	14503068.24	16712157.03	33807409.5	12101228.23	16481393.55	25118662.85	21488246.66	23683708.05	9995980.882	22120840.09	29325234.85	16895322.62	16592058	22641149.23	22455207.95	16802085.38	14966673.96	21180912.94	27407294.99	17848518.36	17193315.85	21759699.6
RRM2	C9JXC1|P31350|P31350-2	Ribonucleoside-diphosphate reductase subunit M2 (Fragment) OS=Homo sapiens GN=RRM2 PE=1 SV=1|Ribonucleoside-diphosphate reductase subunit M2 OS=Homo sapiens GN=RRM2 PE=1 SV=1|Isoform 2 of Ribonucleoside-diphosphate reductase subunit M2 OS=Homo sapiens GN=RRM2	1	8	2	4	6.79665	27513000	17146300	13651700	10853700	16497900	30198100	14463400	12731800	33205500	24269100	22928400	8843960	22622400	30967900	16966000	13977300	TRUE	25253461.51	18680455.02	12530537.58	11824828.37	15142989.96	32900057.08	13275575.74	13870970.25	30478458.05	26440563.32	21045377.35	9635268.074	20764507.97	33738734.48	15572646.68	15227910.62	25336943.73	23557586.91	14205833.8	12202821.35	19192157.62	26671714.37	19580603.95	14470133.97	26402762.58
TSFM	P43897	Elongation factor Ts, mitochondrial OS=Homo sapiens GN=TSFM PE=1 SV=2	1	8	2	2	6.45447	12444600	9673930	11541700	13737100	9399440	12881400	8510810	14390500	12988100	12863000	22944900	11017500	14348600	12338900	15591700	16914300	TRUE	12405680.43	9704279.42	11505604.18	13780196.55	9370043.943	12921812.02	8484193.068	14435646.42	12947480.67	12903354.29	22873141.51	11052064.52	14303725.81	12377610.06	15542938.11	16967364.18	12446690.8	12237892.79	13043869.81	14220694.92	11875551.71	10475570.86	12513628.6	15059201.62	11216094.26
HEATR1	Q5T3Q7|Q9H583	HEAT repeat-containing protein 1 OS=Homo sapiens GN=HEATR1 PE=1 SV=1|HEAT repeat-containing protein 1 OS=Homo sapiens GN=HEATR1 PE=1 SV=3	1	8	2	5	6.33457	25823900	24722100	27257800	37779000	24737800	24497900	21436800	35252500	34708100	39589400	49257200	24506800	33727300	29204000	29529800	44941100	TRUE	26610234.23	23991560.27	28087796.29	36662627.99	25491062.63	23773985.39	22089547.63	34210786.23	35764956.9	38419530.55	50757075.01	23782622.4	34754291.68	28341019.82	30428978.37	43613087.45	26698201.63	30255326.52	31843052.49	37834587.16	32307258.56	19273308.44	32580634.7	35688538.81	30982330.68
TNS3	Q68CZ2	Tensin-3 OS=Homo sapiens GN=TNS3 PE=1 SV=2	1	8	2	2	6.10331	7412280	6204040	6185340	6265670	5974150	7785370	4264820	6946250	8667940	8741260	10214900	5453110	10089700	9844930	9087240	10021100	TRUE	7431575.889	6187931.375	6201441.879	6249401.354	5989702.102	7765155.494	4275922.319	6928214.247	8690504.664	8718563.551	10241491.76	5438951.145	10115965.84	9819367.901	9110896.2	9995080.48	7456142.994	7803489.316	7030556.518	6449169.993	7591321.606	6295126.14	6306705.117	7227482.038	7528377.289
GRPEL1	Q9HAV7	GrpE protein homolog 1, mitochondrial OS=Homo sapiens GN=GRPEL1 PE=1 SV=2	1	8	2	2	6.5518	7997530	5548850	8355470	10560400	7355670	11437300	5395450	8231000	9908660	8557370	13998100	6775880	9372520	8868310	8755080	13569900	TRUE	8120003.962	5465156.735	8483425.446	10401117.56	7468314.535	11264791.28	5478075.778	8106851.885	10060400.96	8428299.249	14212466.53	6673679.45	9516050.523	8734549.343	8889155.063	13365225.29	8146846.855	6892011.176	9617634.613	10733600.14	9465308.379	9132242.379	8079802.664	8457031.538	8715085.833
PSMD3	O43242|O43242-2	26S proteasome non-ATPase regulatory subunit 3 OS=Homo sapiens GN=PSMD3 PE=1 SV=2|Isoform 2 of 26S proteasome non-ATPase regulatory subunit 3 OS=Homo sapiens GN=PSMD3	1	8	2	2	6.20225	9483020	6166130	6935980	5233210	6515790	10403500	5910620	6914210	10117000	9384350	13002000	4670530	11180000	11738300	9679080	9911100	TRUE	8845240.784	6610734.014	6469501.611	5610546.542	6077571.433	11153636.29	5513102.058	7412753.741	9436582.545	10061001.27	12127552.26	5007294.938	10428090.63	12584681	9028114.795	10625732.17	8874481.144	8336678.144	7334455.052	5789893.519	7702686.802	9042130.245	8131464.131	7732951.466	8174686.795
G3BP1	Q13283	Ras GTPase-activating protein-binding protein 1 OS=Homo sapiens GN=G3BP1 PE=1 SV=1	1	8	2	3	6.46591	10649600	9554960	9623530	13001400	8794580	14385500	7626580	11810600	11483000	12140500	15631000	7506080	12988100	11970900	12717700	14408200	TRUE	10978875.84	9268389.902	9921080.703	12611465.09	9066500.331	13954053.49	7862386.845	11456379.28	11838043.81	11776385	16114296.15	7280959.426	13389680.12	11611871.6	13110919.6	13976072.68	11015169.52	11688200.34	11247500.17	13014603.74	11490841.9	11312397.67	11596505.19	11951243.5	10255015.51
PCK2	B4DW73|H0YML5|Q16822	Phosphoenolpyruvate carboxykinase [GTP], mitochondrial OS=Homo sapiens GN=PCK2 PE=1 SV=1|Phosphoenolpyruvate carboxykinase [GTP], mitochondrial OS=Homo sapiens GN=PCK2 PE=1 SV=1|Phosphoenolpyruvate carboxykinase [GTP], mitochondrial OS=Homo sapiens GN=PCK2 PE=1 SV=3	1	8	2	3	6.26777	10891100	7307340	10854100	9558940	7138500	10832000	7530250	8885870	15029100	10044800	20584300	6862380	12153600	11844500	13812600	12714700	TRUE	9883302.09	8052467.682	9849725.851	10533662.79	6477945.476	11936536.41	6833445.25	9791960.002	13638396.07	11069065.81	18679550.75	7562135.219	11028977.81	13052280.78	12534463.78	14011214.87	9915974.046	10154822.63	11166605.38	10870382.31	8210119.07	9676818.759	10078883.79	10214928.77	11814617.82
MALT1	Q9UDY8|Q9UDY8-2	Mucosa-associated lymphoid tissue lymphoma translocation protein 1 OS=Homo sapiens GN=MALT1 PE=1 SV=1|Isoform 2 of Mucosa-associated lymphoid tissue lymphoma translocation protein 1 OS=Homo sapiens GN=MALT1	1	8	2	11	7.28348	66585500	68261400	43442100	43658400	68010800	80095000	38172900	59969300	75485000	72381900	65135100	35515000	96715100	76683900	48337100	56043000	TRUE	66222081.77	68636009.74	43204996.56	43897991.66	67639602.6	80534551.01	37964555.43	60298403.77	75073009.03	72779122.51	64779597.94	35709901.73	96187236.87	77104731.33	48073280.05	56350556.74	66440996.96	86555641.34	48981378.22	45301236.79	85726129.26	65288474.6	55995230.53	62903024.45	65033960.4
SF3B4	Q15427	Splicing factor 3B subunit 4 OS=Homo sapiens GN=SF3B4 PE=1 SV=1	1	8	2	2	6.06732	11656100	11388300	13282300	15235000	10933700	13798400	9122940	12165300	14284200	12265000	23022000	10580200	19023800	14161500	19166900	22387700	TRUE	11343264.05	11702378	12925818.77	15655166.16	10640252.41	14178946.16	8878091.072	12500806.88	13900828.95	12603256.51	22404116.73	10871991.4	18513223.69	14552060.09	18652483.06	23005130.51	11380762.31	14757659.08	14653962.92	16155599.89	13485408.23	11494715.68	13094602.34	13040785.69	12041957.17
EIF4A1	P60842	Eukaryotic initiation factor 4A-I OS=Homo sapiens GN=EIF4A1 PE=1 SV=1	1	8	2	5	7.17181	41501300	32478600	29111800	25806800	32604400	50721800	23553900	32412900	44168400	38311900	45344700	19370700	50052500	50388200	36168800	32961700	TRUE	39765944.29	33895941.52	27894504.92	26932989.22	31241063.63	52935260.96	22569005.68	33827374.42	42321520.86	39983802.32	43448634.48	20216022.69	47959580.22	52587102.91	34656420.06	34400123.64	39897401.49	42745564.15	31623918.63	27793930.33	39594784.06	42914033.76	33287803.89	35288565.32	36662125.94
GAA	P10253	Lysosomal alpha-glucosidase OS=Homo sapiens GN=GAA PE=1 SV=4	1	8	2	5	7.00445	56069700	31570500	50979600	41354000	33501200	67335600	33421700	40026600	57722400	31269500	85086500	30469300	42557900	52224200	59562200	51378300	TRUE	51089522.97	34647974.01	46451531.67	45385163.91	30525583.82	73899435.19	30453145.1	43928369.73	52595428.2	34317632.7	77529016.49	33439429.67	38777857.02	57314984.69	54271814.99	56386626.85	51258413.35	43693938.83	52661965.57	46835948.05	38687988.15	59909459.19	44916392.7	45825878.34	45562167.27
PRDX2	P32119	Peroxiredoxin-2 OS=Homo sapiens GN=PRDX2 PE=1 SV=5	1	8	2	3	6.9235	31038500	19945500	22520900	16418200	21443200	45178700	19169100	22080600	45191900	79227900	33370300	13342100	23957500	32565300	24219800	21560500	TRUE	30968097.32	19990843.98	22469817.25	16455525.04	21394561.73	45281408.98	19125619.93	22130797.9	45089394.04	79408016.23	33294608.24	13372431.85	23903158.7	32639333.76	24164863.75	21609515.51	31070470.82	25210094.94	25473966.09	16981543.07	27115371.68	36709140.16	28209035.64	23086749.14	39059868.58
MCM5	P33992	DNA replication licensing factor MCM5 OS=Homo sapiens GN=MCM5 PE=1 SV=5	1	8	2	5	6.4807	18591900	15716400	11025900	14535900	13260300	16504500	8642560	14074300	22024200	28498600	22000900	13815300	33172600	25479400	27883700	32704500	TRUE	19185530.64	15230109.74	11377951.81	14086136.28	13683695.16	15993824.68	8918512.884	13638818.91	22727422.37	27616808.27	22703378.41	13387832.78	34231785.55	24691027.09	28774013.45	31692571.08	19248953.66	19206418.34	12899150.69	14536414.33	17342653.93	12966017.74	13154221.86	14227954.74	19688224.91
MCM7	P33993	DNA replication licensing factor MCM7 OS=Homo sapiens GN=MCM7 PE=1 SV=4	1	8	2	5	6.3552	22547400	19125000	15481500	18659500	21195800	22612700	12465000	18485800	27411300	28868400	29557600	16139600	45825900	30059100	27845200	47012000	TRUE	22589233.98	19089581.58	15510224.06	18624943.66	21235126.25	22570822.56	12488127.31	18451565.34	27462158.36	28814937.36	29612440.57	16109710.37	45910924.44	30003432.25	27896863.41	46924936.43	22663908.87	24073529.08	17583895.64	19220309.43	26913303.86	18297917.56	18419169.13	19248590.24	23789813.98
MCM4	P33991	DNA replication licensing factor MCM4 OS=Homo sapiens GN=MCM4 PE=1 SV=5	1	8	2	11	6.94079	51368600	47662900	41063800	45784400	44716600	59773600	33139000	44867800	61425700	63190800	74090700	39708300	107521000	70574000	71875300	121933000	TRUE	51817737.72	47249774.93	41422838.43	45387557.1	45107576.43	59255503.69	33428748.5	44478901.87	61962771.26	62643084.62	74738506.8	39364122.58	108461102.3	69962289.67	72503736.6	120876128.1	51989035.41	59585844.05	46960950.76	46838417.75	57169140.25	48037785.02	49305212.66	46400191	53676873.55
ATP6V1A	P38606|P38606-2	V-type proton ATPase catalytic subunit A OS=Homo sapiens GN=ATP6V1A PE=1 SV=2|Isoform 2 of V-type proton ATPase catalytic subunit A OS=Homo sapiens GN=ATP6V1A	1	8	2	8	7.33659	49404700	40745800	54177300	55715900	36982100	58423300	34666000	50018000	53316800	43141900	88199900	39792300	61133900	54483300	71620800	71785800	TRUE	48000502.66	41937769.69	52637454.18	57345802.07	35930982.06	60132403.82	33680711.05	51481216.82	51801411.61	44403964.73	85693052.16	40956376.18	59396331.31	56077143.83	69585169.04	73885807.79	48159181.44	52886969.47	59674927.83	59178920.5	45538765.66	48748678.31	49676840.89	53704974.56	44874329.6
LAP3	P28838|P28838-2	Cytosol aminopeptidase OS=Homo sapiens GN=LAP3 PE=1 SV=3|Isoform 2 of Cytosol aminopeptidase OS=Homo sapiens GN=LAP3	1	8	2	4	6.36483	16271300	12473400	16304700	16538800	11664900	20081900	9788760	14378900	18214900	21529400	25285800	10986600	16167300	17839700	17451000	21472600	TRUE	16595481.44	12229740.61	16629546.89	16215725.79	11897305.78	19689613.74	9983786.479	14098017.97	18577804.78	21108837.81	25789581.94	10771984.24	16489409.4	17491213.59	17798685.21	21053147.36	16650342.34	15422706.63	18852868.66	16734078.39	15078592.03	15962153.27	14725430.58	14706989.13	16093509.99
CBX1	J3KS05|P83916	Chromobox protein homolog 1 (Fragment) OS=Homo sapiens GN=CBX1 PE=1 SV=7|Chromobox protein homolog 1 OS=Homo sapiens GN=CBX1 PE=1 SV=1	1	8	2	2	6.39264	9329760	9455840	12688700	18178000	8317250	12032000	6956810	11799900	10283400	8803320	27090700	10927800	15075700	13351900	16670000	20722900	TRUE	9508394.677	9278192.671	12931647.5	17836489.02	8476498.391	11805954.23	7090010.372	11578214.7	10480293.79	8637931.596	27609399.13	10722498.89	15364350.81	13101057.2	16989176.49	20333577.86	9539827.274	11700562.43	14660570.94	18406651.01	10743076.08	9570957.223	10457300.52	12078341.66	9078829
CCT8	P50990|P50990-2	T-complex protein 1 subunit theta OS=Homo sapiens GN=CCT8 PE=1 SV=4|Isoform 2 of T-complex protein 1 subunit theta OS=Homo sapiens GN=CCT8	1	8	2	19	8.0767	148444000	130403000	128136000	164660000	136713000	186153000	97960300	157093000	171436000	154833000	240101000	112590000	195723000	169623000	163519000	187251000	TRUE	148772816.6	130114784.2	128419832.6	164296069.7	137015831.4	185741566	98177290.73	156745794.2	171815745.9	154490789.2	240632845	112341154.4	196156543.8	169248100.5	163881209.1	186837139.2	149264625.8	164085421.6	145589188.5	169547965	173653250.8	150578644.4	144805067.9	163516509.7	148839890.1
BOP1	Q14137|Q14137-2	Ribosome biogenesis protein BOP1 OS=Homo sapiens GN=BOP1 PE=1 SV=2|Isoform 2 of Ribosome biogenesis protein BOP1 OS=Homo sapiens GN=BOP1	1	8	2	3	6.36291	13714200	11325500	12745400	17009800	12465900	16657700	10237500	16010300	17241000	15686100	21572500	11358300	17774700	13879700	15379100	18946200	TRUE	13765341.09	11283423.42	12792928.38	16946605.07	12512386.1	16595813.2	10275676.26	15950818.42	17305292.74	15627822.89	21652945.17	11316101.56	17840982.94	13828134.04	15436449.61	18875810.95	13810846.19	14229322.98	14503305.48	17488320.99	15858142.08	13454043.2	15155948.88	16639822.26	14991163.1
SEC13	A0A0C4DFR6|P55735|P55735-2|P55735-3	Protein SEC13 homolog OS=Homo sapiens GN=SEC13 PE=1 SV=1|Protein SEC13 homolog OS=Homo sapiens GN=SEC13 PE=1 SV=3|Isoform 2 of Protein SEC13 homolog OS=Homo sapiens GN=SEC13|Isoform 3 of Protein SEC13 homolog OS=Homo sapiens GN=SEC13	1	8	2	5	7.07658	36738300	30826100	30865700	29562400	28490700	44729700	24530300	31641500	44042600	31035100	46762800	22166000	42150600	39515600	36178800	36307000	TRUE	35230409.72	32145482.23	29598845.27	30827694.84	27321325	46644167.66	23523476.03	32995782.02	42234911.33	32363427.6	44843463.19	23114722.89	40420566.76	41206899.92	34693873.89	37860969.22	35346873.47	40538091.32	33556124.3	31813134.29	34626924.88	37813913.62	34695585.09	34421051.86	36587098.17
SARNP	F8VZQ9|P82979	SAP domain-containing ribonucleoprotein OS=Homo sapiens GN=SARNP PE=1 SV=1|SAP domain-containing ribonucleoprotein OS=Homo sapiens GN=SARNP PE=1 SV=3	1	8	2	2	7.07939	10451200	9154290	12637300	14471500	9228140	15704600	8690880	10678900	11301100	9464550	19288700	9831980	13640000	11481800	13880300	18106500	TRUE	10440138.73	9163988.92	12623925.02	14486832.47	9218373.185	15721238.94	8681681.806	10690214.24	11289139.22	9474577.638	19268285.36	9842396.928	13625563.79	11493964.9	13865609.46	18125683.74	10474651.46	11556542.13	14311706.87	14949919.2	11683324.87	12745035.47	12804911.55	11151983.56	9779512.536
KPNA4	O00629	Importin subunit alpha-3 OS=Homo sapiens GN=KPNA4 PE=1 SV=1	1	8	2	4	6.60777	14412000	10716800	11770100	14176300	10231600	14984900	8322330	12079900	15362900	14845200	18499300	8855710	15907300	16326200	14171600	16917600	TRUE	14480693.58	10665961.59	11826201.19	14109050.4	10280368.06	14913814.56	8361997.683	12022595.31	15436125.97	14774777.27	18587475.35	8813700.242	15983120.8	16248751.7	14239147.74	16837346.21	14528563.47	13450652.94	13407329.69	14560060.93	13029292.41	12090465.41	12333398.42	12541917.53	13371948.42
CDK2	G3V5T9|P24941|P24941-2	Cyclin-dependent kinase 2 OS=Homo sapiens GN=CDK2 PE=1 SV=1|Cyclin-dependent kinase 2 OS=Homo sapiens GN=CDK2 PE=1 SV=2|Isoform 2 of Cyclin-dependent kinase 2 OS=Homo sapiens GN=CDK2	1	8	2	2	6.25802	7862550	6758290	5631210	4890820	7160610	10330200	5799190	6663160	9269450	8683170	9467120	4841330	9057860	10534900	7329190	7589810	TRUE	7698713.552	6902113.279	5513869.259	4994901.62	7011400.277	10550037.15	5678348.963	6804958.816	9076297.172	8867956.682	9269848.209	4944358.422	8869116.194	10759093.38	7176467.479	7751328.87	7724163.753	8704131.312	6251057.449	5154568.865	8886217.295	8552799.068	8375192.483	7098902.526	7862580.154
SMU1	Q2TAY7	WD40 repeat-containing protein SMU1 OS=Homo sapiens GN=SMU1 PE=1 SV=2	1	8	2	6	7.25757	25491900	22872500	26633800	34895300	22831800	28958400	20641600	29412300	28400400	32725500	42316700	21399800	31235100	27968400	29529300	41185400	TRUE	26195681.36	22258000.27	27369106.98	33957791.97	23462141.21	28180394.58	21211474.09	28622099.96	29184479.34	31846286.5	43484981.08	20824866.29	32097439.84	27216992.23	30344546.05	40078900.18	26282278.34	28069165.09	31028276.52	35043288.24	29735812.65	22845535.9	31285533.78	29858446.35	25281819.63
DAP3	P51398|P51398-2|P51398-3	28S ribosomal protein S29, mitochondrial OS=Homo sapiens GN=DAP3 PE=1 SV=1|Isoform 2 of 28S ribosomal protein S29, mitochondrial OS=Homo sapiens GN=DAP3|Isoform 3 of 28S ribosomal protein S29, mitochondrial OS=Homo sapiens GN=DAP3	1	8	2	3	6.2968	10684800	8728180	14706300	14674900	10151400	11089000	9135490	15301200	12939400	21156700	22887200	10780900	15137500	13214500	16252100	22060100	TRUE	10892658.46	8561625.062	14992391.35	14394867.16	10348881.88	10877394.87	9313208.711	15009215.83	13191118.68	20752978.62	23332439.79	10575174.16	15431979.77	12962335.15	16568262.82	21639139.55	10928667.12	10796911.87	16996830.22	14855014.11	13116126.52	8818184.363	13736372.33	15657546.65	11427152.06
PRDX6	P30041	Peroxiredoxin-6 OS=Homo sapiens GN=PRDX6 PE=1 SV=3	1	8	2	6	7.11625	90499100	47224300	39481800	20508900	48764000	102114000	35284700	32039600	103229000	37377300	51814600	19591300	60616900	96929300	41573800	26173600	TRUE	76711679.76	55711941.93	33466799.09	24194972.63	41334867.99	120466989.2	29909121.82	37798089.85	87502196.04	44095136.76	43920713.05	23112452.02	51381994.08	114350441	35240085.61	30877791.38	76965271.18	70257331.13	37941212.24	24968390.19	52387626.48	97661262.98	44113994.03	39430797.86	75801069.2
PPP1CB	P62140	Serine/threonine-protein phosphatase PP1-beta catalytic subunit OS=Homo sapiens GN=PPP1CB PE=1 SV=3	1	8	2	2	6.24889	8034120	6928830	5950180	7774820	5647400	6197620	4419870	7949850	11692800	10672700	13670200	6543800	11972100	11181800	11547100	14356700	TRUE	8095099.086	6876636.232	5995341.952	7716253.525	5690263.847	6150934.32	4453416.877	7889965.052	11781548.52	10592304.26	13773957.01	6494506.602	12062968.41	11097569.29	11634742.65	14248553.28	8121859.648	8672002.664	6796901.633	7962911.624	7211814.904	4986494.791	6568497.955	8230776.166	10206074.99
EIF3CL|EIF3C	B5ME19|Q99613|Q99613-2	Eukaryotic translation initiation factor 3 subunit C-like protein OS=Homo sapiens GN=EIF3CL PE=3 SV=1|Eukaryotic translation initiation factor 3 subunit C OS=Homo sapiens GN=EIF3C PE=1 SV=1|Isoform 2 of Eukaryotic translation initiation factor 3 subunit C OS=Homo sapiens GN=EIF3C	1	8	2	5	6.77797	24163800	19837500	19140100	25205000	24016000	28086700	17052300	26357000	28716600	27763800	37799300	18397700	31237800	30636300	26622300	31638600	TRUE	24268804.75	19751668.35	19223274.06	25095944.58	24120362.48	27965176.22	17126401.44	26242960.18	28841389.12	27643673.33	37963558.35	18318097.98	31373545.09	30503744.77	26737988.25	31501708.09	24349031.91	24908474.83	21793369.57	25898162.65	30570039.32	22671060.74	25260319.43	27376538.4	24984608.74
POLR2H	C9JLU1|P52434|P52434-3	DNA-directed RNA polymerases I, II, and III subunit RPABC3 (Fragment) OS=Homo sapiens GN=POLR2H PE=1 SV=7|DNA-directed RNA polymerases I, II, and III subunit RPABC3 OS=Homo sapiens GN=POLR2H PE=1 SV=4|Isoform 3 of DNA-directed RNA polymerases I, II, and III subunit RPABC3 OS=Homo sapiens GN=POLR2H	1	8	2	3	6.35087	13845200	11956900	15065600	17226400	12238300	19542200	10474700	15855900	17248200	22521500	22435500	11818300	15588600	14889900	16111100	19857900	TRUE	14427344.52	11474438.11	15699058.28	16531313.36	12752879.73	18753670.64	10915126.23	15216113.15	17973429.33	21612755.65	23378838.01	11341430.63	16244048.68	14289091.33	16788518.07	19056632.12	14475038.05	14470208.19	17797976.45	17059754.05	16162942.63	15203394.49	16099095.66	15873381.01	15569953.92
AKR1C3	A0A0A0MSS8|P42330|P42330-2|S4R3Z2	Aldo-keto reductase family 1 member C3 OS=Homo sapiens GN=AKR1C3 PE=1 SV=1|Aldo-keto reductase family 1 member C3 OS=Homo sapiens GN=AKR1C3 PE=1 SV=4|Isoform 2 of Aldo-keto reductase family 1 member C3 OS=Homo sapiens GN=AKR1C3|Aldo-keto reductase family 1 member C3 OS=Homo sapiens GN=AKR1C3 PE=1 SV=1	1	8	2	4	7.30565	45303200	30000500	21506800	16214200	32420600	50870500	22733200	28511200	46504800	34301600	32832400	15415100	44083100	50514900	25636500	23243000	TRUE	42452317.33	32015181.67	20153399.72	17303063.57	30380405.78	54286705.19	21302623.66	30425867.82	43578301.91	36605121.77	30766291.64	16450300.06	41308996.94	53907224.9	24023222.05	24803882.19	42592655.07	40373771.62	22847850.31	17856174.06	38503990.16	44009634.73	31419973.43	31740128.89	37750845.44
GOLGA2	A0A0C4DGS5|Q08379	Golgi autoantigen, golgin subfamily a, 2, isoform CRA_a OS=Homo sapiens GN=GOLGA2 PE=1 SV=1|Golgin subfamily A member 2 OS=Homo sapiens GN=GOLGA2 PE=1 SV=3	1	8	2	5	6.91046	30678900	24769900	35214600	41034000	28596200	37460100	24888200	36937000	33353200	34066200	57920500	28308800	40284800	29680700	34885500	50637500	TRUE	30633325.88	24806750.92	35162288.01	41095047.51	28553719.77	37515830.51	24851228.08	36991952.28	33303653.16	34116881.31	57834457.94	28350915.85	40224956.13	29724856.87	34833676.89	50712834.93	30734592.71	31283348.84	39863383.06	42408693.61	36188856.5	30413671.11	36653932.33	38589838.76	28850161.84
KARS	Q15046|Q15046-2	Lysine--tRNA ligase OS=Homo sapiens GN=KARS PE=1 SV=3|Isoform Mitochondrial of Lysine--tRNA ligase OS=Homo sapiens GN=KARS	1	8	2	7	7.28829	43603500	39152500	33082700	40466100	38717700	49017500	28521600	42833500	47510600	48701400	56358300	32821100	70245100	53914000	47652200	71281900	TRUE	44591603.66	38284921.23	33832390.67	39569413.22	39595086.01	47931323.07	29167931.08	41884354.09	48587242.88	47622227.52	57635441.57	32093818.49	71836931.86	52719321.71	48732051.69	69702367.07	44739013.39	48280427.77	38355682.33	40834290.82	50182634.6	38857396.36	43020786.28	43693570.39	42089971.75
CWC22	B7WP74|Q9HCG8	Pre-mRNA-splicing factor CWC22 homolog (Fragment) OS=Homo sapiens GN=CWC22 PE=1 SV=1|Pre-mRNA-splicing factor CWC22 homolog OS=Homo sapiens GN=CWC22 PE=1 SV=3	1	8	2	2	6.38452	10638500	10035600	10590700	13929700	8891350	10947200	7486690	12419900	12350300	12340900	18457400	8784750	14439700	11321000	12038700	13253400	TRUE	10664783.27	10010867.35	10616865.18	13895370.37	8913316.795	10920220.72	7505186.469	12389291.26	12380812.41	12310485.96	18503000.49	8763100.057	14475374.44	11293099.49	12068442.58	13220737.11	10700038.62	12624525.33	12036308.99	14339550.39	11296697.77	8852902.81	11069658.05	12924453.09	10725203.03
ADSL	P30566	Adenylosuccinate lyase OS=Homo sapiens GN=ADSL PE=1 SV=2	1	8	2	2	5.95623	8965100	5212370	5996790	4189090	5578130	10476500	5017010	5278420	8768050	7343520	9454840	3380470	7503350	9412410	6554350	6432890	TRUE	8308062.425	5624586.804	5557295.03	4520381.388	5169317.939	11305027.01	4649321.51	5695860.324	8125453.899	7924277.38	8761910.179	3647812.215	6953441.702	10156784.17	6073992.366	6941630.814	8335526.996	7093065.578	6300289.119	4664880.098	6551570.394	9164861.042	6857444.446	5941895.952	7038887.263
PSMC1	P62191|P62191-2	26S protease regulatory subunit 4 OS=Homo sapiens GN=PSMC1 PE=1 SV=1|Isoform 2 of 26S protease regulatory subunit 4 OS=Homo sapiens GN=PSMC1	1	8	2	3	6.24095	11843700	7851320	8259100	8030270	8415460	14455300	6940700	8714610	12889700	10800000	13591600	6280160	14207200	11883400	10095100	11379700	TRUE	11352033.27	8191367.7	7916240.533	8378068.185	8066109.571	15081371.99	6652571.184	9092047.563	12354610.74	11267757.67	13027372.82	6552159.354	13617417.46	12398080.7	9676022.788	11872565	11389560.52	10329986.95	8974618.736	8645881.881	10222951.13	12226302.37	9812106.395	9484783.252	10702505.15
MDH2	P40926	Malate dehydrogenase, mitochondrial OS=Homo sapiens GN=MDH2 PE=1 SV=3	1	8	2	13	7.88493	114416000	81753200	135283000	132361000	80247500	126687000	99417700	119566000	132928000	115415000	238701000	87796600	122989000	128494000	164064000	161326000	TRUE	108622933.1	86113253.14	128433403.1	139420063.1	76184439.42	133443457.9	94384021.22	125942681.4	126197640.6	121570300.8	226615182.7	92478959.12	116761868.2	135346828.6	155757174.6	169929821.4	108982015.8	108595879.7	145604573.4	143876770.9	96555817.16	108181143.4	139210244.1	131382840.6	109322011.6
RBM14	Q96PK6	RNA-binding protein 14 OS=Homo sapiens GN=RBM14 PE=1 SV=2	1	8	2	2	6.84874	13366200	9898960	12968200	15561500	10807200	20207000	13934800	16026400	15073400	15456700	25624600	12506100	13749000	14087100	13449100	19183400	TRUE	13648890.8	9693936.384	13242473.23	15239195.94	11035768.78	19788480.05	14229516.51	15694467.1	15392197.53	15136566.52	26166551.99	12247078.26	14039786.9	13795333.17	13733544.11	18786080.48	13694010.94	12224849.38	15012953.17	15726332.75	13986683.9	16042303.1	20987604.05	16372397.71	13333894.27
TP53BP1	A6NNK5|Q12888|Q12888-2|Q12888-3	Tumor suppressor p53-binding protein 1 OS=Homo sapiens GN=TP53BP1 PE=1 SV=2|Tumor suppressor p53-binding protein 1 OS=Homo sapiens GN=TP53BP1 PE=1 SV=2|Isoform 2 of Tumor suppressor p53-binding protein 1 OS=Homo sapiens GN=TP53BP1|Isoform 3 of Tumor suppressor p53-binding protein 1 OS=Homo sapiens GN=TP53BP1	1	8	2	6	6.48871	25242900	19869600	23904300	30214400	19724800	28662600	15285300	24612200	32197300	30167900	45360400	22339000	35102700	27623900	33378700	41723000	TRUE	25329982.63	19801289.76	23986764.75	30110525.1	19792846.36	28564060.07	15338031.03	24527585.05	32308373.83	30064184.96	45516883.73	22262200.15	35223796.84	27528931.05	33493849.41	41579559.37	25413717.81	24971051.51	27193725.03	31073039.46	25085364.79	23156569.29	22622590.3	25587066.75	27987975.06
JUP	P14923	Junction plakoglobin OS=Homo sapiens GN=JUP PE=1 SV=3	1	8	2	14	7.04362	45565400	39000400	45506000	61568800	53800200	49596200	32904600	56942000	157607000	462765000	98489500	40417500	60009100	77300600	54151400	74680300	TRUE	49653916.42	35789096.9	49589186.54	56499208.96	58627612.93	45512435.97	35857081.43	52253380.88	171748844.6	424660809.3	107326818.2	37089512.52	65393628.4	70935648.45	59010325.59	68531104.64	49818061.01	45132988.46	56219115.72	58305265.16	74304373.93	36896431.19	52886844.54	54510492.65	148781935.1
DARS	P14868|P14868-2	Aspartate--tRNA ligase, cytoplasmic OS=Homo sapiens GN=DARS PE=1 SV=2|Isoform 2 of Aspartate--tRNA ligase, cytoplasmic OS=Homo sapiens GN=DARS	1	8	2	9	7.14542	51138000	44687400	41329500	46309400	44157100	59811600	35978700	47381700	53868400	57869800	66980400	32804400	74650600	62018200	54230900	77977900	TRUE	51437021.99	44427616	41571168.22	46040186.73	44415302.19	59463893.57	36189080.19	47106253.06	54183387.6	57533381.95	67372058.11	32613696.17	75087108.48	61657665.8	54548007.27	77524586.3	51607061.12	56026870.02	47129111.8	47511909.36	56291754.99	48206724.4	53376520.95	49141031.99	46937778.69
SEC24C	G5EA31|P53992	Protein transport protein Sec24C OS=Homo sapiens GN=SEC24C PE=1 SV=1|Protein transport protein Sec24C OS=Homo sapiens GN=SEC24C PE=1 SV=3	1	8	2	3	6.15695	9024480	6062930	6224900	6977950	5811920	9459970	5545140	7772400	9357290	9444570	11926000	5012350	11880500	10666500	10243500	11038200	TRUE	8829578.281	6196761.475	6090460.818	7131979.378	5686399.948	9668786.816	5425381.596	7943965.852	9155200.582	9653046.88	11668434.15	5122991.256	11623916.81	10901949.43	10022271.1	11281854.24	8858766.864	7814624.797	6904737.613	7359960.544	7206917.815	7838379.112	8002082.199	8287109.559	7930932.299
CLTC	A0A087WVQ6|Q00610|Q00610-2	Clathrin heavy chain OS=Homo sapiens GN=CLTC PE=1 SV=1|Clathrin heavy chain 1 OS=Homo sapiens GN=CLTC PE=1 SV=5|Isoform 2 of Clathrin heavy chain 1 OS=Homo sapiens GN=CLTC	1	8	2	36	7.88447	239496000	212105000	219547000	265911000	195184000	229373000	157241000	243487000	255506000	243993000	378231000	164189000	367914000	269848000	268646000	373838000	TRUE	236649208	214656535.3	216937333.7	269109799.2	192863926.8	232132262.2	155371939.9	246416047.8	252468903.6	246928134.7	373735121.3	166164125.7	363540755.3	273094159.7	265452713.8	378335116.3	237431516.7	270699508.2	245941220.6	277712174.9	244434876.7	188187071.5	229163426.1	257060116.2	218707800.5
PPM1G	O15355	Protein phosphatase 1G OS=Homo sapiens GN=PPM1G PE=1 SV=1	1	8	2	4	6.98731	47916200	29649100	30432800	20306300	28363400	64839300	27047200	24104700	43683500	27837600	41552900	15573500	38284200	43567400	31788100	25808700	TRUE	43129174.04	32939935.37	27392437.79	22560152.23	25529779.39	72035992.7	24345073.19	26780147.12	39319338.23	30927371.99	37401593.95	17302045.71	34459450.56	48403065.87	28612337.73	28673278.78	43271749.31	41539961.93	31054726.6	23281311.05	32356328	58398786.87	35907387.05	27936929.4	34061406.6
YBX1	A0A087X1S2|H0Y449|P67809	Nuclease-sensitive element-binding protein 1 OS=Homo sapiens GN=YBX1 PE=1 SV=2|Nuclease-sensitive element-binding protein 1 (Fragment) OS=Homo sapiens GN=YBX1 PE=1 SV=1|Nuclease-sensitive element-binding protein 1 OS=Homo sapiens GN=YBX1 PE=1 SV=3	1	8	2	3	6.38934	9630980	8313720	8502120	8211900	7293330	11992600	5665170	7444630	9037360	8399030	10085800	5124830	11626900	10042400	8531000	10745400	TRUE	9584538.874	8354003.474	8461122.3	8251690.113	7258161.153	12050709.2	5637852.232	7480702.367	8993781.343	8439726.836	10037165.71	5149661.959	11570834.44	10091059.66	8489863.039	10797465.99	9616223.186	10535084.01	9592349.601	8515464.001	9198960.924	9769377.384	8315462.46	7803835.168	7791098.655
RPS14	P62263	40S ribosomal protein S14 OS=Homo sapiens GN=RPS14 PE=1 SV=3	1	8	2	3	6.85829	19237000	12658800	17456600	15889500	15472100	25550800	13344100	15625900	20642000	18236200	26095300	11767300	22847100	21344700	20030300	21010100	TRUE	18306041.33	13302566.69	16611802.32	16697564.81	14723340.55	26850192.82	12698323.34	16420559.36	19643047.52	19163606.87	24832439.59	12365729.21	21741433.54	22430190.47	19060950.24	22078574.3	18366556.96	16775628.35	18832751.69	17231319.9	18660295.84	21767155.96	18729194.51	17129853.9	17016304.41
POFUT2	Q9Y2G5	GDP-fucose protein O-fucosyltransferase 2 OS=Homo sapiens GN=POFUT2 PE=1 SV=3	1	8	2	6	7.11097	34817400	20339900	38357200	32720200	22549600	48034400	30822700	32871300	39945300	30312100	63146200	22590600	28766600	31379600	39277700	40786300	TRUE	32595304.41	21726516.97	35909189.38	34950810.01	21110452.71	51309013.64	28855551.8	35112210.84	37395934.6	32378544.39	59116120.42	24130652.27	26930675	33518818.27	36770941.77	43566794.28	32703057.09	27398921.02	40710142.96	36068049.13	26755293.18	41595652.95	42560047.31	36628900.91	32395207.82
SSRP1	Q08945	FACT complex subunit SSRP1 OS=Homo sapiens GN=SSRP1 PE=1 SV=1	1	8	2	2	6.09495	5237320	3974200	4634730	4879910	4318920	7420840	3837600	4877700	6927210	8216520	7934690	3958230	6734980	5629020	6029620	6541130	TRUE	5215749.031	3990636.248	4615640.92	4900092.027	4301131.648	7451530.647	3821794.063	4897872.887	6898678.875	8250501.37	7902009.363	3974600.201	6707240.613	5652300.149	6004785.782	6568182.397	5232991.115	5032519.826	5232738.61	5056728.584	5451234.979	6040873.927	5636895.709	5109439.035	5976161.267
MYO1B	E9PDF6|O43795|O43795-2	Unconventional myosin-Ib OS=Homo sapiens GN=MYO1B PE=1 SV=1|Unconventional myosin-Ib OS=Homo sapiens GN=MYO1B PE=1 SV=3|Isoform 2 of Unconventional myosin-Ib OS=Homo sapiens GN=MYO1B	1	8	2	11	6.91278	65299900	62814700	68614000	96657100	63289600	75198500	50846400	82157500	70354700	81172900	124003000	57584400	97815300	76587900	81309700	125501000	TRUE	67463313.49	60800358.25	70887211.03	93557500.19	65386411.39	72787034.56	52530962.88	79522873.35	72685581.16	78569847.5	128111272.2	55737783.5	101055962.5	74131879.28	84003524.97	121476434	67686331.9	76674241.73	80364623.78	96548163.35	82870444.82	59007648.24	77479726.64	82957904.92	62965788.48
HKDC1	Q2TB90	Putative hexokinase HKDC1 OS=Homo sapiens GN=HKDC1 PE=1 SV=3	1	8	2	12	7.57556	63738300	67888800	79840900	112794000	66586600	73874800	45298600	90920900	83572800	80367300	125990000	71237100	98872000	63965300	79549600	141379000	TRUE	66753233.09	64822578.64	83617514.24	107699619.6	69736262.66	70538218.86	47441303.02	86814425.8	87525939.63	76737482.83	131949547.4	68019651.5	103548818.6	61076284.88	83312435.24	134993568.1	66973904.14	81746591.74	94796931.29	111142350.4	88383426.83	57184558.09	69972811.99	90564419.74	75821637.7
KIF5B	P33176	Kinesin-1 heavy chain OS=Homo sapiens GN=KIF5B PE=1 SV=1	1	8	2	9	6.78492	59669500	39035100	38564600	33191400	40334900	71704200	32846200	37404000	62348100	44773500	66882900	25733400	66170400	66968700	47568900	46403700	TRUE	55468095.3	41991795.22	35849217.91	35705466.92	37494868.86	77135400.78	30533457.66	40237148.32	57958091.7	48164847.62	62173590.72	27682564.24	61511258.74	72041212.57	44219513.8	49918526.35	55651460.25	52955100.1	40642153.48	36846829.45	47520828.79	62532820.9	45034848.47	41975212.72	50207714.99
ESYT1	Q9BSJ8|Q9BSJ8-2	Extended synaptotagmin-1 OS=Homo sapiens GN=ESYT1 PE=1 SV=1|Isoform 2 of Extended synaptotagmin-1 OS=Homo sapiens GN=ESYT1	1	8	2	2	6.22401	4600330	5148140	4631450	6403020	4807880	6058820	3165810	7353970	5457310	6910090	10481700	5161010	8256140	5214200	6191720	8634300	TRUE	4869856.748	4863211.406	4902800.025	6048638.906	5089566.806	5723488.975	3351290.275	6946957.695	5777045.98	6527644.646	11095807.8	4875369.104	8739855.422	4925615.254	6554484.01	8156426.641	4885955.391	6132908.714	5558290.046	6241989.963	6450494.165	4639969.553	4942933.466	7247035.119	5004517.393
SRSF11	Q05519|Q05519-2|Q5T760	Serine/arginine-rich splicing factor 11 OS=Homo sapiens GN=SRSF11 PE=1 SV=1|Isoform 2 of Serine/arginine-rich splicing factor 11 OS=Homo sapiens GN=SRSF11|Serine/arginine-rich-splicing factor 11 (Fragment) OS=Homo sapiens GN=SRSF11 PE=1 SV=1	1	8	2	2	5.93048	4796670	4014550	3561970	6170120	3880560	3838520	1665110	4114020	7667760	7023450	8846240	3730140	6959250	6799340	6820480	7440080	TRUE	4911160.543	3920961.529	3646989.79	6026280.192	3973184.137	3749035.196	1704854.103	4018112.652	7850779.888	6859717.091	9057388.738	3643181.785	7125358.636	6640831.615	6983276.368	7266634.479	4927395.726	4944654.287	4134581.657	6218916.53	5035595.773	3039301.593	2514548.042	4191677.103	6800943.707
HMGN1	A6NEL0|A6NL93|P05114	Non-histone chromosomal protein HMG-14 OS=Homo sapiens GN=HMGN1 PE=1 SV=1|Non-histone chromosomal protein HMG-14 OS=Homo sapiens GN=HMGN1 PE=1 SV=1|Non-histone chromosomal protein HMG-14 OS=Homo sapiens GN=HMGN1 PE=1 SV=3	1	8	2	2	6.94785	20074000	19027600	21542300	25793000	14562800	26194000	16576500	19420000	22123800	18166900	31072300	16731300	25810900	19359300	30624100	30835600	TRUE	19793805.81	19296948.05	21241611.18	26158116.69	14359531.49	26564793.11	16345124.14	19694902.73	21814994.56	18424064.29	30638590.82	16968142.43	25450629.78	19633343.48	30196646.82	31272097.97	19859239.64	24335035.22	24081552.46	26994288.2	18199205.87	21535785.55	24107986.62	20545634.22	18897810.42
HNRNPF	P52597	Heterogeneous nuclear ribonucleoprotein F OS=Homo sapiens GN=HNRNPF PE=1 SV=3	1	8	2	5	6.82488	24864600	19224700	23234200	27511800	19782100	28340200	15649700	25481900	29615700	31650800	42416300	21418200	31864100	29513300	31988400	37820700	TRUE	25228981	18947038.55	23574688.13	27114448.35	20071998.95	27930883.81	15879040.24	25113866.1	30049706.52	31193668.96	43037894.31	21108857.93	32331055.94	29087040.78	32457177.51	37274457.38	25312382.29	23893770.62	26726554.97	27981190	25439161.53	22643260.25	23420543.42	26198672.51	26031345.34
SYMPK	A0A087WUE9|Q92797	Symplekin OS=Homo sapiens GN=SYMPK PE=1 SV=1|Symplekin OS=Homo sapiens GN=SYMPK PE=1 SV=2	1	8	2	2	6.04328	6603920	6408860	7226930	11604800	6750770	5896130	4986630	10653600	9427160	10032000	15262600	7559340	11615600	7341410	9427220	15375400	TRUE	6795396.901	6228274.721	7436470.721	11277806.42	6946504.733	5729992.14	5131214.498	10353408.81	9700495.137	9749323.904	15705130.4	7346337.137	11952387.71	7134547.847	9700556.877	14942160.56	6817860.942	7854365.586	8430705.103	11638313.28	8803968.973	4645241.597	7568205.013	10800629.65	8403307.99
HSPB1	P04792	Heat shock protein beta-1 OS=Homo sapiens GN=HSPB1 PE=1 SV=2	1	8	2	8	7.6371	62961600	36525300	41652700	26000400	37212600	93118800	32731000	34313500	68651200	47449900	59847000	20422600	52192900	58472000	44395300	34287800	TRUE	56825686.55	40469222.08	37593442.26	28807866.37	33586051.55	103173564.5	29541205.22	38018596.74	61960807.42	52573436.51	54014619.43	22627787.72	47106448.62	64785678.78	40068762.58	37990121.71	57013539.38	51035010.4	42619575.52	29728739.9	42566811.24	83641673.83	43571341.15	39660829.66	53675172.32
SRSF7	A0A0B4J1Z1|C9JAB2|Q16629|Q16629-2|Q16629-3|Q16629-4	Serine/arginine-rich-splicing factor 7 OS=Homo sapiens GN=SRSF7 PE=1 SV=1|Serine/arginine-rich-splicing factor 7 OS=Homo sapiens GN=SRSF7 PE=1 SV=1|Serine/arginine-rich splicing factor 7 OS=Homo sapiens GN=SRSF7 PE=1 SV=1|Isoform 2 of Serine/arginine-rich splicing factor 7 OS=Homo sapiens GN=SRSF7|Isoform 3 of Serine/arginine-rich splicing factor 7 OS=Homo sapiens GN=SRSF7|Isoform 4 of Serine/arg…	1	8	2	3	6.73761	12741300	11571200	16133500	19792800	13641400	21852000	12039100	16628000	15458200	15610200	24416800	11513700	17043700	13943700	14961500	20802500	TRUE	12973606.72	11364004.92	16427655.27	19438388.11	13890117.86	21460715.87	12258603.81	16330257.34	15740042.81	15330682.17	24861981.16	11307534.52	17354450.56	13694022.69	15234286.69	20430008.32	13016494.52	14330942.86	18623984.72	20059756.48	17604273.14	17397966.28	18080637.02	17035651.24	13635224.35
RPL30	E5RI99|P62888	60S ribosomal protein L30 (Fragment) OS=Homo sapiens GN=RPL30 PE=1 SV=1|60S ribosomal protein L30 OS=Homo sapiens GN=RPL30 PE=1 SV=2	1	8	2	3	6.43178	14078200	10808200	12320100	12205500	12097700	20085600	9463680	13798900	16572100	14266400	20550500	8552650	17826300	15809100	13385300	15352200	TRUE	13731468.38	11081116.53	12016668.58	12513699.58	11799746.06	20592779.02	9230599.271	14147334.33	16163946.18	14626639.11	20044362.27	8768611.915	17387256.52	16208293.64	13055633.79	15739856.52	13776861.5	13974197.39	13623262.02	12913713.05	14954945.29	16694339.43	13614528.82	14758435.74	14002441.75
HSPA5	P11021	78 kDa glucose-regulated protein OS=Homo sapiens GN=HSPA5 PE=1 SV=2	1	8	2	26	8.42636	223768000	164842000	255350000	322046000	155612000	288191000	142295000	225167000	219709000	192734000	495333000	207517000	223064000	191707000	282906000	342253000	TRUE	224322085.8	164434832.7	255982288	321250531.6	155997320.5	287479155	142647345.5	224610827.2	220253035.1	192257938.2	496559524.8	207004423.5	223616342.6	191233474.9	283606521.1	341407619.4	225063643.8	207365819.4	290206371.1	331519640.2	197710305.1	233056188.6	210395483.5	234313007.8	190799960.6
ARF4	P18085	ADP-ribosylation factor 4 OS=Homo sapiens GN=ARF4 PE=1 SV=3	1	8	2	3	6.81722	33141900	24736400	22273300	19289200	26120300	36233800	17912800	22404000	40631900	32960000	37422800	15580700	52257900	49160600	33402900	35487000	TRUE	31189551.54	26284805.47	20961207.37	20496631.27	24581585.34	38501899.41	16857579.04	23806406.02	38238324.88	35023171.86	35218269.01	16555993.14	49179451.56	52237868.4	31435176.36	37708352.54	31292657.13	33147296.93	23763659.48	21151827.49	31154591.12	31213066.32	24863824.01	24834736.02	33124950.48
SNRNP200	O75643	U5 small nuclear ribonucleoprotein 200 kDa helicase OS=Homo sapiens GN=SNRNP200 PE=1 SV=2	1	8	2	17	7.02162	90488400	75536200	92272800	112254000	80584000	103813000	70726800	106961000	109737000	109226000	161397000	74525700	115475000	103796000	109202000	146498000	TRUE	91010952.64	75102497.91	92805657.2	111609477.3	81049356.69	103216942.5	71135233.3	106346867.8	110370709.5	108598863	162329035.8	74097799.84	116141845.3	103200040.1	109832620	145656860.4	91311814.21	94710413.63	105213502.1	115177190.8	102721591.5	83676839.91	104919805.9	110940575.7	95611517.96
ALDH2	P05091	Aldehyde dehydrogenase, mitochondrial OS=Homo sapiens GN=ALDH2 PE=1 SV=2	1	8	2	12	7.20874	82498600	74824600	81453200	102687000	65087800	89479600	54522100	82883700	98648400	96003800	148236000	73810700	99305500	83826900	96622800	124869000	TRUE	83712205.29	73739841.45	82651426.82	101198310.4	66045281.69	88182382.76	55324153.72	81682105.84	100099578.8	94611999.13	150416643	72740640.31	100766345.2	82611631.94	98044180.99	123058730.2	83988938.86	92991992	93701680.81	104433220.1	83705494.08	71488487.67	81599500.03	85210406.57	86713881.98
NAXE	Q8NCW5|Q8NCW5-2	NAD(P)H-hydrate epimerase OS=Homo sapiens GN=NAXE PE=1 SV=2|Isoform 2 of NAD(P)H-hydrate epimerase OS=Homo sapiens GN=NAXE	1	8	2	2	6.69722	14445700	10173200	8778090	9885070	10234700	16642300	7580850	8758990	18163600	12607400	16395800	5980290	13914300	18191600	11692400	10635000	TRUE	13739722	10695922.03	8349094.631	10392987.26	9734518.423	17497419.02	7210365.129	9209046.72	17275923.95	13255196.73	15594518.37	6287570.828	13234292.13	19126325.56	11120978.95	11181450.36	13785142.41	13488435.51	9465344.161	10725209.94	12337485.03	14184965.12	10634815.9	9606836.248	14965721.61
GALE	Q14376|Q14376-2|Q5QPP3|Q5QPP4	UDP-glucose 4-epimerase OS=Homo sapiens GN=GALE PE=1 SV=2|Isoform 2 of UDP-glucose 4-epimerase OS=Homo sapiens GN=GALE|UDP-glucose 4-epimerase (Fragment) OS=Homo sapiens GN=GALE PE=1 SV=1|UDP-glucose 4-epimerase (Fragment) OS=Homo sapiens GN=GALE PE=1 SV=1	1	8	2	2	6.75169	19285100	10711400	11991700	9229830	11333700	19636000	9427310	12506100	18516000	13231700	15998900	7014770	14379500	18800400	12195300	9538620	TRUE	17941167.42	11513766.93	11156027.05	9921215.849	10543881.5	21106888.69	8770343.27	13442903.88	17225664.16	14222856.95	14883974.85	7540230.676	13377426.97	20208695.77	11345438.65	10253136.62	18000476.85	14519805.05	12647555.24	10238357.87	13363268.17	17111122.48	12935681.39	14023577.06	14922182.76
ABCF1	H0YGW7|Q8NE71|Q8NE71-2	ATP-binding cassette sub-family F member 1 (Fragment) OS=Homo sapiens GN=ABCF1 PE=1 SV=1|ATP-binding cassette sub-family F member 1 OS=Homo sapiens GN=ABCF1 PE=1 SV=2|Isoform 2 of ATP-binding cassette sub-family F member 1 OS=Homo sapiens GN=ABCF1	1	8	2	2	6.49491	10306600	8957680	8312660	8526070	8621530	15868400	6840620	7518010	9875640	9225520	10867200	5264520	12626300	11092800	11368300	11056200	TRUE	10076904.28	9161863.812	8127401.777	8720415.576	8429388.215	16230108.66	6688168.065	7689377.58	9655548.776	9435809.031	10625010.6	5384520.911	12344906.81	11345652.32	11114942.94	11308218.05	10110216.24	11553862.19	9214011.62	8999172.763	10683368.85	13157570.55	9864609.46	8021524.214	8364372.027
RCN1	Q15293	Reticulocalbin-1 OS=Homo sapiens GN=RCN1 PE=1 SV=1	1	8	2	9	7.64717	99948400	55480500	93368300	90189200	52464400	113320000	57235900	66026400	105288000	63048100	188997000	55958700	77566500	90343800	120063000	104304000	TRUE	91411927.51	60661528.07	85393825.93	98611488.49	47983478.77	123902350.6	52347450.7	72192253.44	96295478.7	68935825.88	172854993.8	61184384.61	70941638.64	98780525.76	109808563.7	114044394.4	91714114.62	76499165.47	96810730.66	101763707.7	60814045.99	100446272.6	77209058.21	75310635.1	83418480.62
THOP1	P52888	Thimet oligopeptidase OS=Homo sapiens GN=THOP1 PE=1 SV=2	1	8	2	6	7.25155	49249600	30573600	35087900	23257300	34911300	64824100	30780100	34033100	51012300	33849300	50878200	20537200	37787000	52271800	36076000	31285600	TRUE	45394988.08	33169687.54	32341679.98	25232140.61	32178901.91	70328490.66	28371037.99	36922943.1	47019727.07	36723536.14	46896122.66	22281069.52	34829529.88	56710340.73	33252444.49	33942145.4	45545053.62	41829698.27	36665667.99	26038712.32	40783396.09	57014533.75	41845421.2	38517848.69	40732070.13
DLAT	P10515	Dihydrolipoyllysine-residue acetyltransferase component of pyruvate dehydrogenase complex, mitochondrial OS=Homo sapiens GN=DLAT PE=1 SV=3	1	8	2	2	6.8109	10199100	6604690	10452900	10923800	8128790	12029000	7424140	10766700	11084000	10360200	18065300	7506650	9998870	10754800	11061700	13369500	TRUE	10003273.85	6733984.774	10252200.8	11137646.56	7972714.496	12264482.19	7281594.013	10977471.14	10871183.47	10563013.41	17718440.16	7653601.729	9806888.331	10965338.18	10849311.64	13631224.09	10036342.4	8492107.468	11622890.06	11493673.06	10104582.63	9942680.795	10739873.83	11451648.67	9417447.421
PRKCSH	K7ELL7|P14314|P14314-2	Glucosidase 2 subunit beta OS=Homo sapiens GN=PRKCSH PE=1 SV=1|Glucosidase 2 subunit beta OS=Homo sapiens GN=PRKCSH PE=1 SV=2|Isoform 2 of Glucosidase 2 subunit beta OS=Homo sapiens GN=PRKCSH	1	8	2	5	7.48052	55177400	21777800	54250900	46137800	22670300	81554800	15803000	26475000	63739900	46364700	95096400	27149400	33250000	41297600	55242300	48504000	TRUE	52550142.11	22866586.72	51667757.17	48444471.2	21590859.42	85632153.24	15050544.17	27798624.45	60704940.84	48682715.12	90568409.05	28506741.25	31666809.69	43362284.15	52611951.91	50928969.98	52723860.96	28836642.55	58575585.16	49993049.29	27364158.49	69421044.66	22198566.02	28999400.38	52587245
NDUFS3	O75489	NADH dehydrogenase [ubiquinone] iron-sulfur protein 3, mitochondrial OS=Homo sapiens GN=NDUFS3 PE=1 SV=1	1	8	2	3	6.22828	7797540	5919950	9012520	11690600	8131900	9607260	6520880	11692100	9678790	9482790	17564200	8186320	11224100	9128280	12564500	14122400	TRUE	7730412.531	5971356.217	8934933.01	11792115.98	8061894.092	9690685.179	6464743.042	11793629	9595467.224	9565134.337	17412993.3	8257406.367	11127473.96	9207545.93	12456334.72	14245032.65	7755967.522	7530370.267	10129507.42	12169063.28	10217608.45	7856131.875	9535072.198	12303060.9	8312324.809
ATP1A1	P05023|P05023-3|P05023-4	Sodium/potassium-transporting ATPase subunit alpha-1 OS=Homo sapiens GN=ATP1A1 PE=1 SV=1|Isoform 3 of Sodium/potassium-transporting ATPase subunit alpha-1 OS=Homo sapiens GN=ATP1A1|Isoform 4 of Sodium/potassium-transporting ATPase subunit alpha-1 OS=Homo sapiens GN=ATP1A1	1	8	2	5	6.55257	10806600	8921490	14972700	16117200	12441500	18492900	10447300	21499200	19518800	35957100	29257300	13136100	22915800	16595200	23866000	29613700	TRUE	11292168.78	8537861.565	15645462.54	15424152.51	13000529.11	17697696.25	10916724.49	20574723.88	20395830.7	34410927.11	30571906.96	12571241.27	23945466.79	15881598.28	24938361.76	28340296.41	11329498.13	10766944.15	17737215.12	15917201.65	16476812.35	14347327.67	16101453	21463459.7	17668422.56
USP5	P45974|P45974-2	Ubiquitin carboxyl-terminal hydrolase 5 OS=Homo sapiens GN=USP5 PE=1 SV=2|Isoform Short of Ubiquitin carboxyl-terminal hydrolase 5 OS=Homo sapiens GN=USP5	1	8	2	8	7.0912	67079700	43474900	36716000	32854200	44027700	91198800	35032400	40397700	71582400	55409400	63250600	28111900	55567400	73472300	45822700	44574900	TRUE	65058892.71	44825282.57	35609913.35	33874690.88	42701344.98	94031544.18	33977032.59	41652501.05	69425946.77	57130482.46	61345146.14	28985089.35	53893406.13	75754437.82	44442269.76	45959449.89	65273962.66	56528360.2	40370854.6	34957530.74	54119493.29	76230338.5	50113895.74	43451702.33	60142044.81
HOGA1	Q86XE5	4-hydroxy-2-oxoglutarate aldolase, mitochondrial OS=Homo sapiens GN=HOGA1 PE=1 SV=1	1	8	2	3	6.25463	7861610	6128530	6829380	9268680	5797300	6323170	5244940	7252790	10600600	11049800	15357400	5781820	10189100	9520380	11309000	11190500	TRUE	7597633.685	6341462.978	6600063.795	9590716.057	5602638.869	6542865.656	5068825.955	7504784.879	10244654.17	11433720.26	14841730.83	5982706.698	9846971.47	9851161.259	10929267.58	11579308.82	7622749.739	7997105.269	7482473.018	9897293.308	7100759.399	5304229.214	7476186.003	7828957.937	8874700.001
ANXA5	P08758	Annexin A5 OS=Homo sapiens GN=ANXA5 PE=1 SV=2	1	8	2	6	7.0758	67218500	27945500	32695800	10693300	36488500	184122000	35544100	42900200	72750100	55483300	52606400	16803200	50367400	100152000	30202700	37410900	TRUE	64343269.22	29194267.16	31297256.88	11171138.72	34927726.43	192349639.8	34023722.57	44817229.97	69638258.37	57962615.92	50356192.98	17554064.52	48212964.86	104627372.7	28910797.73	39082636.18	64555973.48	36816366.91	35481608.58	11528235.83	44267243.98	155935737.1	50182760.41	46753133.35	60325965.29
DCTN2	Q13561|Q13561-2|Q13561-3	Dynactin subunit 2 OS=Homo sapiens GN=DCTN2 PE=1 SV=4|Isoform 2 of Dynactin subunit 2 OS=Homo sapiens GN=DCTN2|Isoform 3 of Dynactin subunit 2 OS=Homo sapiens GN=DCTN2	1	8	2	2	6.58878	12314900	11380500	11782900	10664000	11068300	15910600	8878590	10867200	12628000	11774500	16830700	9007360	15051700	13160100	12933600	15021200	TRUE	12091066.94	11591178.86	11568736.46	10861414.82	10867124.88	16205141.28	8717214.593	11068376.51	12398476.1	11992472.69	16524788.69	9174106.656	14778123.43	13403723.29	12698521.57	15299276.47	12131037.26	14617427.84	13115442.68	11208611.28	13772945.38	13137329.78	12857320.08	11546480.75	10740504.66
CAP1	Q01518|Q01518-2	Adenylyl cyclase-associated protein 1 OS=Homo sapiens GN=CAP1 PE=1 SV=5|Isoform 2 of Adenylyl cyclase-associated protein 1 OS=Homo sapiens GN=CAP1	1	8	2	3	6.74683	24441000	18675700	19090700	15554700	19572100	37262500	16744000	18865000	27306600	24091100	29465600	13358900	25770200	29196300	21052100	20571000	TRUE	23651529.92	19299080.67	18474050.25	16073904.06	18939900.52	38506293.92	16203151.14	19494699.36	26424568.01	24895242.6	28513830.03	13804809.92	24937795.35	30170850.29	20372094.96	21257644.34	23729716.51	24337724.62	20943976.73	16587723.18	24004345.06	31216628.9	23898585.75	20336782.96	22890974.16
ALDH6A1	Q02252|Q02252-2	Methylmalonate-semialdehyde dehydrogenase [acylating], mitochondrial OS=Homo sapiens GN=ALDH6A1 PE=1 SV=2|Isoform 2 of Methylmalonate-semialdehyde dehydrogenase [acylating], mitochondrial OS=Homo sapiens GN=ALDH6A1	1	8	2	3	6.47871	15804800	11481500	15440000	15468100	10149400	19004100	11840100	13530300	18296600	17054200	24873500	10905800	14999500	16254100	17909600	18068400	TRUE	15450507.33	11744780.11	15093884.97	15822796.09	9921883.165	19439879.44	11574683.12	13840560.76	17886449.2	17445266.65	24315916.3	11155878.85	14663259.56	16626819.71	17508124.49	18482723.08	15501583.2	14811131.64	17111893.23	16328588.28	12574950.27	15759696.42	17071898.84	14438410.93	15494605.11
GPT2	Q8TD30|Q8TD30-2	Alanine aminotransferase 2 OS=Homo sapiens GN=GPT2 PE=1 SV=1|Isoform 2 of Alanine aminotransferase 2 OS=Homo sapiens GN=GPT2	1	8	2	2	5.99952	3686960	2718330	3528570	3994680	2765040	5057090	2797460	3963690	5891640	5186980	7772190	2766810	4456890	4928690	5352380	5230460	TRUE	3615947.426	2771714.518	3460608.091	4073130.397	2711784.036	5156404.768	2743579.612	4041531.793	5778164.257	5288845.641	7622493.985	2821146.603	4371048.214	5025483.157	5249290.657	5333179.533	3627900.928	3495359.486	3923281.27	4203332.262	3436902.937	4180240.624	4046600.075	4216107.846	5005486.131
GEMIN5	Q8TEQ6	Gem-associated protein 5 OS=Homo sapiens GN=GEMIN5 PE=1 SV=3	1	8	2	3	6.07863	7703330	7310020	7560060	9230600	7960690	9121890	5655770	9108540	10562300	10227600	13380600	6756860	11022900	9417590	9721650	12918400	TRUE	7786289.969	7232134.507	7641477.042	9132251.455	8046421.573	9024699.718	5716679.049	9011491.958	10676049.26	10118628.8	13524700.56	6684868.217	11141609.63	9317249.147	9826345.993	12780759.34	7812029.679	9120315.165	8663120.17	9424173.406	10197998.65	7316224.788	8431726.847	9400748.005	9248407.3
NUP107	P57740|P57740-2	Nuclear pore complex protein Nup107 OS=Homo sapiens GN=NUP107 PE=1 SV=1|Isoform 2 of Nuclear pore complex protein Nup107 OS=Homo sapiens GN=NUP107	1	8	2	8	7.0171	38467800	32807500	38368400	53311200	36220100	34699000	27752600	45576500	48567000	46097000	75545000	32993100	55390500	41358200	46548500	62787200	TRUE	37869991.42	33325393.04	37772136.15	54152760.6	35657221.79	35246751.9	27321310.91	46295962.08	47812244.88	46824678.59	74370993.45	33513922.88	54529704.32	42011072.78	45825113.36	63778346.96	37995181.03	42026055.68	42822160.26	55883810.12	45191803.13	28574154.04	40297142.58	48295740.06	41418609.43
AARS	P49588	Alanine--tRNA ligase, cytoplasmic OS=Homo sapiens GN=AARS PE=1 SV=2	1	8	2	12	7.32904	110910000	53446600	50157300	32630800	57947200	130541000	47430000	43078000	123204000	64365900	75592000	27065500	74324300	113635000	57328800	38063100	TRUE	97235182.94	60963143.45	43973079.45	37219881.92	50802511.88	148899831	41582046.05	49136339.7	108013375.5	73418095.72	66271769.44	30871897.54	65160372.44	129616230.1	50260358.45	43416161.65	97556620.41	76879527.22	49852151.54	38409654.3	64386875.93	120711455.1	61330792.05	51258809.26	93569415.66
LAS1L	Q9Y4W2|Q9Y4W2-2|Q9Y4W2-4	Ribosomal biogenesis protein LAS1L OS=Homo sapiens GN=LAS1L PE=1 SV=2|Isoform 2 of Ribosomal biogenesis protein LAS1L OS=Homo sapiens GN=LAS1L|Isoform 4 of Ribosomal biogenesis protein LAS1L OS=Homo sapiens GN=LAS1L	1	8	2	2	5.49136	3010980	2164190	2705580	3323250	2335880	3079210	1738760	3414660	4072290	4353000	5802820	2390650	4689110	3518150	4846380	4693330	TRUE	2952665.127	2206932.56	2653179.933	3388883.891	2290640.063	3140024.123	1705084.729	3482099.231	3993420.305	4438971.362	5690434.427	2437865.125	4598294.101	3587633.149	4752518.189	4786022.849	2962425.968	2783123.084	3007902.329	3497213.103	2903146.952	2545583.016	2514888.2	3632510.305	3459404.935
LRRC15	Q8TF66|Q8TF66-2	Leucine-rich repeat-containing protein 15 OS=Homo sapiens GN=LRRC15 PE=2 SV=2|Isoform 2 of Leucine-rich repeat-containing protein 15 OS=Homo sapiens GN=LRRC15	1	8	2	3	6.72335	10035200	9832470	10220200	15522600	8763700	11729900	7432990	13656500	11809300	17596200	18774600	11114400	12253900	10101600	11595200	16952600	TRUE	10924499.56	9032066.173	11125893.89	14258996	9540321.748	10775037.5	8091686.861	12544804.28	12855816.79	16163796.36	20438367.89	10209641.76	13339816.36	9279287.875	12622743.67	15572588.07	10960613.48	11390176.72	12613393.36	14714799.69	12091361.04	8735204.376	11934707.68	13086683.57	11136688.02
PPP3CA	Q08209-2|Q08209-3	Isoform 2 of Serine/threonine-protein phosphatase 2B catalytic subunit alpha isoform OS=Homo sapiens GN=PPP3CA|Isoform 3 of Serine/threonine-protein phosphatase 2B catalytic subunit alpha isoform OS=Homo sapiens GN=PPP3CA	1	8	2	4	6.57165	18369900	12632500	13302900	11350200	13570800	23696500	13052400	13480200	19914300	17027800	17285500	8931660	17529600	19801300	12930000	14573800	TRUE	17783748.18	13048866.83	12878427.41	11724302.26	13137779.18	24477535.94	12635920.43	13924507	19278869.04	17589035.79	16733949.52	9226047.251	16970260.71	20453950.27	12517426.01	15054152.02	17842537.22	16455692.01	14600235.48	12099081.82	16650762.47	19843669.13	18637154.31	14525983.27	16700825.26
GBF1	Q92538|Q92538-2|Q92538-3	Golgi-specific brefeldin A-resistance guanine nucleotide exchange factor 1 OS=Homo sapiens GN=GBF1 PE=1 SV=2|Isoform 2 of Golgi-specific brefeldin A-resistance guanine nucleotide exchange factor 1 OS=Homo sapiens GN=GBF1|Isoform 3 of Golgi-specific brefeldin A-resistance guanine nucleotide exchange factor 1 OS=Homo sapiens GN=GBF1	1	8	2	2	6.1632	11648900	9028440	10545400	11996200	9766900	12054200	7780390	10659000	11885900	12040600	16689900	8991740	16122200	12075100	12241300	19450800	TRUE	11625433.13	9046664.628	10524156.15	12020415.29	9747224.448	12078532.37	7764716.299	10680516.04	11861955.69	12064904.91	16656277.97	9009890.546	16089721.61	12099474.55	12216639.74	19490063	11663864.18	11408586.57	11931205.04	12404660.41	12353588.59	9791933.323	11452447.53	11141866.45	10275729.81
MYLK	Q15746|Q15746-6	Myosin light chain kinase, smooth muscle OS=Homo sapiens GN=MYLK PE=1 SV=4|Isoform Del-1790 of Myosin light chain kinase, smooth muscle OS=Homo sapiens GN=MYLK	1	8	2	8	7.01419	39522000	32582300	42648600	44655500	30623200	51401800	31307500	35266600	48677300	40059800	76264600	30421300	50362200	50431800	51672400	56291200	TRUE	38217505.01	33694446.05	41240905.93	46179745.92	29612425.98	53156320.36	30274139.42	36470370.44	47070617.8	41427178.86	73747349.14	31459683.68	48699904.63	52153210.92	49966859.11	58212612.41	38343843.42	42491461.82	46754694.42	47655929.7	37530656	43093244.18	44652371.06	38045726.92	40776155.55
PPIF	P30405	Peptidyl-prolyl cis-trans isomerase F, mitochondrial OS=Homo sapiens GN=PPIF PE=1 SV=1	1	8	2	4	7.11631	21598700	18117700	27767800	32137000	19107800	31195200	29424900	25039800	26275500	21433100	40365300	16236700	25530000	23911800	21490100	29043000	TRUE	20830401.13	18785944.86	26780056.79	33322326.22	18428106.26	32345789.31	28378211.2	25963356.39	25340840.19	22223628.53	38929444.4	16835566.92	24621858.77	24793751.76	20725664.2	30114208.56	20899261.72	23690618.25	30360472.04	34387509.17	23355699.31	26222375.58	41856001.22	27084856.97	21952166.54
MAPRE3	Q9UPY8|Q9UPY8-2	Microtubule-associated protein RP/EB family member 3 OS=Homo sapiens GN=MAPRE3 PE=1 SV=1|Isoform 2 of Microtubule-associated protein RP/EB family member 3 OS=Homo sapiens GN=MAPRE3	1	8	2	2	6.69239	22391600	14340400	11561400	10931700	15454300	25359200	11433900	12784800	22222500	14615900	17873800	7191510	18178000	23143900	12922400	11411500	TRUE	20894846.78	15367640.83	10788585.08	11714766.62	14421266.49	27175746.66	10669607.74	13700609.08	20737050.17	15662875.63	16679036.44	7706656.908	16962902.38	24801758.85	12058609.84	12228935.97	20963920.41	19379856.34	12230987.34	12089241.37	18277448.53	22031078.88	15736971.98	14292413.97	17964012.86
RPS6KA3	P51812	Ribosomal protein S6 kinase alpha-3 OS=Homo sapiens GN=RPS6KA3 PE=1 SV=1	1	8	2	4	6.05907	14109800	10838700	8543890	11064000	10912900	14272000	7533280	11822800	18584600	14707600	17677200	9179540	17042700	17900300	13173900	14084500	TRUE	14057384.73	10879113.88	8512151.043	11105253.95	10872360.61	14325215.5	7505295.271	11866883.26	18515561.68	14762439.71	17611532.5	9213767.426	16979389.55	17967044.22	13124961.42	14137016.38	14103855.25	13719455.46	9650200.738	11460244.98	13779581.13	11613294.63	11069818.52	12379479.41	16039590.27
PLOD3	O60568	Procollagen-lysine,2-oxoglutarate 5-dioxygenase 3 OS=Homo sapiens GN=PLOD3 PE=1 SV=1	1	8	2	6	7.18305	30671700	24128000	44725000	41531000	26322700	47385500	26858200	37018400	35422300	29956000	64408800	25398100	32520500	30786100	41643000	48281200	TRUE	29894942.02	24754915.97	43592343.49	42610096.78	25656080.04	48616713.81	26178018.56	37980246.24	34525233.51	30734344.45	62777653.06	26058016.88	31696921.33	31586012.87	40588394.86	49535686.71	29993767.92	31217980.71	49420512.3	43972173.01	32516400.89	39413035.09	38610861.3	39620822.59	29908387.82
POLR1B	H7C0D9|Q9H9Y6|Q9H9Y6-2|Q9H9Y6-3|Q9H9Y6-4|Q9H9Y6-5	DNA-directed RNA polymerase I subunit RPA2 (Fragment) OS=Homo sapiens GN=POLR1B PE=1 SV=7|DNA-directed RNA polymerase I subunit RPA2 OS=Homo sapiens GN=POLR1B PE=1 SV=2|Isoform 2 of DNA-directed RNA polymerase I subunit RPA2 OS=Homo sapiens GN=POLR1B|Isoform 3 of DNA-directed RNA polymerase I subunit RPA2 OS=Homo sapiens GN=POLR1B|Isoform 4 of DNA-directed RNA polymerase I subunit RPA2 OS=Homo sa…	1	8	2	2	6.30346	4153710	3737450	5437080	5278610	3768530	4923600	4141430	6087050	4238050	5267280	8582430	3946890	5345450	4965800	6674840	8791120	TRUE	4195362.903	3700343.403	5491602.382	5226202.274	3806320.364	4874716.927	4182959.76	6026615.824	4280548.654	5214984.762	8668493.573	3907704.016	5399053.528	4916497.952	6741774.49	8703838.953	4209231.821	4666436.724	6225813.557	5393263.286	4824113.375	3951879.389	6169591.437	6286938.606	3708137.389
NQO1	B4DLR8|P15559|P15559-2|P15559-3	NAD(P)H dehydrogenase [quinone] 1 OS=Homo sapiens GN=NQO1 PE=1 SV=1|NAD(P)H dehydrogenase [quinone] 1 OS=Homo sapiens GN=NQO1 PE=1 SV=1|Isoform 2 of NAD(P)H dehydrogenase [quinone] 1 OS=Homo sapiens GN=NQO1|Isoform 3 of NAD(P)H dehydrogenase [quinone] 1 OS=Homo sapiens GN=NQO1	1	8	2	2	6.55812	9014320	4316360	4735430	4204220	4845310	12211400	5883080	5067630	11228800	7390220	6819930	4605910	5414970	9553980	4462320	4453260	TRUE	8832892.903	4405017.778	4640122.166	4290574.43	4747790.661	12462221.43	5764673.939	5171718.82	11002803.08	7542014.681	6682668.388	4700515.118	5305985.375	9750218.183	4372508.926	4544729.696	8862092.445	5555088.945	5260492.926	4427727.12	6017328.611	10102985.83	8502516.163	5395113.884	9531466.353
DPYSL3	Q14195-2	Isoform LCRMP-4 of Dihydropyrimidinase-related protein 3 OS=Homo sapiens GN=DPYSL3	1	8	2	5	6.81934	27086900	24132300	22139900	19543200	22201200	36953600	16411200	22634200	29835500	32572400	29453200	15609800	31888100	29566600	23175700	25502500	TRUE	27194970.01	24036400.72	22228232.71	19465537.33	22289777.28	36806750.2	16476676.62	22544254.02	29954536.24	32442960.63	29570710.96	15547768.26	32015325.61	29449105.37	23268165.29	25401155.69	27284870.42	30311874.01	25200082.4	20087773.56	28249963.85	29838827.5	24302017.9	23518064.71	25948901.6
STAG2	Q8N3U4|Q8N3U4-2	Cohesin subunit SA-2 OS=Homo sapiens GN=STAG2 PE=1 SV=3|Isoform 2 of Cohesin subunit SA-2 OS=Homo sapiens GN=STAG2	1	8	2	2	6.13406	6706390	6281940	6237970	10705600	7221310	9041160	5511130	8973320	9016310	10676400	10775500	5921530	8660320	8477870	7431610	9400990	TRUE	7126017.612	5912017.328	6628287.958	10075182.62	7673156.831	8508755.986	5855968.627	8444910.86	9580472.333	10047702.11	11449737.16	5572830.681	9202207.573	7978636.272	7896615.578	8847396.788	7149574.61	7455539.058	7514470.669	10397246.35	9724924.586	6897954.88	8637169.843	8809693.144	8299335.092
HIST1H4A	P62805	Histone H4 OS=Homo sapiens GN=HIST1H4A PE=1 SV=2	1	8	2	6	8.04181	59963700	36428900	61544000	55364800	33572300	70758600	39182900	53560300	46435400	50260900	96859600	42500000	55193000	53750800	67961500	83332300	TRUE	59540877.11	36687595.76	61110033.92	55757966.94	33335571.17	71261084.29	38906609.06	53940652.49	46107969.41	50617822.17	96176612.53	42801809	54803816.82	54132505.3	67482282.11	83924075.02	59737705.75	46266069.26	69280266.7	57540328.56	42249353.53	57770577.15	57384697.89	56270646.82	39942236.17
MTPAP	Q9NVV4|Q9NVV4-2	Poly(A) RNA polymerase, mitochondrial OS=Homo sapiens GN=MTPAP PE=1 SV=1|Isoform 2 of Poly(A) RNA polymerase, mitochondrial OS=Homo sapiens GN=MTPAP	1	8	2	2	6.57218	10912000	9640870	13988500	18695900	11352400	13198000	10544700	16451300	11954300	13864700	22016400	9681500	12498100	11151100	11915700	18984400	TRUE	11216272.69	9379334.505	14378558.51	18188721.55	11668952.9	12839967.43	10838730.81	16005012.59	12287636.42	13488581.33	22630310.3	9418862.303	12846599.86	10848595.3	12247960.09	18469395.19	11253351.14	11828110.59	16300929.73	18770143.03	14789178.62	10409220.35	15986417.43	16696357.37	10644486.89
PPP2R2A	P63151|P63151-2	Serine/threonine-protein phosphatase 2A 55 kDa regulatory subunit B alpha isoform OS=Homo sapiens GN=PPP2R2A PE=1 SV=1|Isoform 2 of Serine/threonine-protein phosphatase 2A 55 kDa regulatory subunit B alpha isoform OS=Homo sapiens GN=PPP2R2A	1	8	2	3	6.28463	23362700	13465400	12980500	8879750	16083100	29909700	13792600	14187200	25003900	16052300	20992200	8697870	20957400	25481900	16085600	12705700	TRUE	21077808.02	14925086.15	11710996.03	9842339.163	14510159.1	33151993.21	12443671.96	15725131.25	22558497.26	17792413.18	18939144.94	9640742.875	18907748.41	28244207.59	14512414.6	14083032.6	21147486.47	18821758.56	13276721.94	10156959.81	18390110.63	26875956.21	18353600.41	16404386.41	19541889.11
PREP	P48147	Prolyl endopeptidase OS=Homo sapiens GN=PREP PE=1 SV=2	1	8	2	5	6.71016	15665400	12873000	8684290	8483930	12656900	14072200	7551990	12400200	22815700	16958100	15811400	6884180	19750200	21494600	12590300	13299400	TRUE	15082657.52	13370368.84	8361240.179	8811720.137	12186071.73	14615901.84	7271060.987	12879301.46	21966971.11	17613303.18	15223226.42	7150161.25	19015505.68	22325078.08	12121949.2	13813243.48	15132517.37	16861132.44	9479113.533	9093395.97	15444572.7	11848950.85	10724338.31	13435629.54	19029464.09
GDI2	P50395	Rab GDP dissociation inhibitor beta OS=Homo sapiens GN=GDI2 PE=1 SV=2	1	8	2	7	6.87824	47041100	31938000	28019000	20622300	29876700	53022500	20187600	27578400	57818600	41534500	43435200	16697900	49923800	58158200	32434700	28378800	TRUE	43982098.03	34159322.07	26196972.53	22056603.03	27933869.49	56710271.6	18874835.03	29496507.23	54058755.7	44423268.91	40610683.51	17859256.81	46677340.99	62203165.03	30325527.14	30352575.9	44127492.87	43077708.64	29699431.13	22761665.37	35403261.03	45974393.36	27839144.35	30770624.08	46829813.05
CPSF7	F5H669|Q8N684|Q8N684-2|Q8N684-3	Cleavage and polyadenylation-specificity factor subunit 7 (Fragment) OS=Homo sapiens GN=CPSF7 PE=1 SV=1|Cleavage and polyadenylation specificity factor subunit 7 OS=Homo sapiens GN=CPSF7 PE=1 SV=1|Isoform 2 of Cleavage and polyadenylation specificity factor subunit 7 OS=Homo sapiens GN=CPSF7|Isoform 3 of Cleavage and polyadenylation specificity factor subunit 7 OS=Homo sapiens GN=CPSF7	1	8	2	2	6.11487	9912020	5133270	6446150	6061500	5379820	8365590	4859750	6171550	5738970	5751670	11479600	4767920	6334400	6172100	6173470	8175700	TRUE	9511112.083	5349645.179	6185424.884	6317001.493	5162224.351	8718212.409	4663189.435	6431690.269	5506847.94	5994111.685	11015288.74	4968895.118	6078194.796	6432263.452	5923773.874	8520318.255	9542553.664	6746341.624	7012398.097	6518931.04	6542580.012	7067758.898	6877898.727	6709510.45	4770451.264
RANBP2	P49792	E3 SUMO-protein ligase RanBP2 OS=Homo sapiens GN=RANBP2 PE=1 SV=2	1	8	2	8	6.49242	28972900	22727700	30854000	42207000	24750300	32018800	18807300	32535500	35719700	34997300	54910000	25577900	40721900	32579600	37994200	51686900	TRUE	29294109.04	22478491.44	31196063.92	41744201.49	25024695.04	31667714.8	19015807.77	32178749.2	36115707.67	34613555.64	55518761.58	25297439.08	41173364.73	32222365.65	38415423.99	51120154.66	29390948.73	28347222.55	35366886.41	43078598.47	31716186.37	25672668.04	28047069.9	33568726.89	31286177.72
RPSA	A0A0C4DG17|C9J9K3|P08865	40S ribosomal protein SA OS=Homo sapiens GN=RPSA PE=1 SV=1|40S ribosomal protein SA (Fragment) OS=Homo sapiens GN=RPSA PE=1 SV=7|40S ribosomal protein SA OS=Homo sapiens GN=RPSA PE=1 SV=4	1	8	2	10	8.14275	74205400	58467400	56242900	50298900	51770500	86136300	37844900	47922800	86845000	63021200	91931100	38561900	103408000	98651400	87864200	80338400	TRUE	70011136.53	61970095.31	53063919.21	53312232.58	48844309.76	91296598.12	35705817.38	50793783.95	81936316.66	66796706.73	86734938.34	40872086.3	97563137	104561459.2	82897909.08	85151354.52	70242577.48	78149376.17	60158409.99	55016413.75	61905059.34	74013147.81	52663739.98	52987847.67	70979480.4
NOL11	Q9H8H0	Nucleolar protein 11 OS=Homo sapiens GN=NOL11 PE=1 SV=1	1	8	2	6	6.70979	24985600	21900900	25957800	32989900	21698400	28963300	18937500	28763000	29866800	30744900	47706100	22369100	29108400	25891100	29468700	37658500	TRUE	25322651.64	21609392.84	26307966.45	32550795.13	21991107.85	28577790.31	19192963.76	28380156.36	30269698.22	30335676.71	48349647.44	22071360.97	29501067.53	25546482.16	29866227.92	37157254.74	25406362.58	27251217.89	29825264.61	33591315.27	27871431.55	23167700.24	28308363.37	29606051.86	26221918.91
KDELC1	Q6UW63	KDEL motif-containing protein 1 OS=Homo sapiens GN=KDELC1 PE=1 SV=1	1	8	2	8	7.3842	29586600	41000100	34982900	70732200	39801600	34919000	25164300	59869300	37752200	53373400	64499300	44327200	63068400	38377300	41963900	86705800	TRUE	33455524.96	36258691.5	39557478.19	62552457.66	45006300.9	30880833.18	28454937.94	52945784.99	42688908.81	47201095.73	72933623.37	39201032.92	71315610.12	33939202.13	47451356.49	76678809.41	33566121.34	45725185.79	44846197.31	64552012.27	57040784.11	25034751.76	41969168.13	55232805.51	36980385.37
COA7	Q96BR5	Cytochrome c oxidase assembly factor 7 OS=Homo sapiens GN=COA7 PE=1 SV=2	1	8	2	2	6.60319	11128600	7144240	12962200	14113900	7491520	16328000	7614150	8927040	11456700	10058000	19299700	6692050	11905600	10443300	12445100	14095800	TRUE	10708440.98	7424553.154	12472813.62	14667676.45	7208678.52	16968649.42	7326678.638	9277303.533	11024153.6	10452638.16	18571042.04	6954620.917	11456105.43	10853055.88	11975236.67	14648866.27	10743840.66	9362970.872	14140392.32	15136544.03	9136246.856	13756297.42	10806370.7	9678041.449	9549961.805
EXOSC10	Q01780|Q01780-2	Exosome component 10 OS=Homo sapiens GN=EXOSC10 PE=1 SV=2|Isoform 2 of Exosome component 10 OS=Homo sapiens GN=EXOSC10	1	8	2	2	6.04542	10154000	8679800	10702400	13706900	8514530	13235300	8677130	11344900	13560400	15017100	17496700	8882990	12967300	12051300	11929600	16216000	TRUE	10448618.02	8435057.06	11012929.83	13320408.72	8761578.845	12862106.35	8928896.679	11025009.66	13953854.62	14593665.22	18004366.25	8632517.744	13343545.84	11711491.41	12275737	15758760.03	10483158.78	10637299.23	12485326.33	13746209.49	11104385.77	10427168.13	13169537.28	11501240.64	12087892.05
RNH1	P13489	Ribonuclease inhibitor OS=Homo sapiens GN=RNH1 PE=1 SV=2	1	8	2	5	7.57599	52429600	31654100	31664600	19843100	31523600	62230000	32503700	28233400	51151400	29912200	42606900	15533800	39711800	52934200	32875900	23379800	TRUE	46177432.73	35939888.88	27888634.22	22529745.25	27764448.3	70655595.49	28627672.54	32056045.15	45051656.56	33962145.32	37526077.99	17636990.03	34976215.21	60101195.93	28955488.14	26545294.74	46330084.85	45323149.52	31617263.03	23249932.08	35188537.37	57279714.04	42223940.34	33440722.57	39027177.49
TXN	P10599	Thioredoxin OS=Homo sapiens GN=TXN PE=1 SV=3	1	8	2	3	6.77673	15016300	7213220	9673780	6585300	10440500	15428900	8749090	9241520	15572300	14862000	12729600	4924920	11514600	15271500	9066530	8507670	TRUE	13715246.86	7897479.105	8835617.346	7209993.477	9535906.636	16892513.38	7991045.007	10118187.31	14223073.5	16271836.22	11626672.78	5392106.825	10516943.69	16720182.13	8280981.14	9314722.975	13760586.35	9959369.309	10016913.54	7440468.446	12085765.34	13694574.78	11786267.54	10555247.64	12321109.96
CALU	O43852|O43852-3|O43852-4	Calumenin OS=Homo sapiens GN=CALU PE=1 SV=2|Isoform 3 of Calumenin OS=Homo sapiens GN=CALU|Isoform 4 of Calumenin OS=Homo sapiens GN=CALU	1	8	2	10	7.95777	112501000	58519500	109333000	105332000	57139200	135804000	75385900	71102400	107012000	63680700	193692000	64594400	74968100	78310300	126696000	101317000	TRUE	101282466.3	65001401.62	98430377.41	116999079.5	51441312.51	150846305	67868462.3	78978044.21	96340826.17	70734280.98	174377147.4	71749186.79	67492325.07	86984325.93	114061949.2	112539358.8	101617283.2	81972102.2	111590230.9	120739077.3	65196488.99	122289440.1	100101532.9	82389541.61	83457764.05
COLGALT1	Q8NBJ5	Procollagen galactosyltransferase 1 OS=Homo sapiens GN=COLGALT1 PE=1 SV=1	1	8	2	8	7.18104	62660000	41315500	73734800	70842100	43879700	81360600	47689600	65243600	66942100	57137600	117558000	47825100	60956500	61317300	77224200	90745700	TRUE	61051263.64	42404187.49	71841728.6	72708830.6	42753130.12	83504499.2	46465214.53	66962806.86	65223424.76	58643209.04	114539809.3	49085319.24	59391499.39	62933046.57	75241541.55	93136902.06	61253085.28	53475160.6	81446757.57	75033044.27	54185125.55	67696178.93	68533145.46	69855299.88	56501500.05
CHERP	J3QK89|Q8IWX8	Calcium homeostasis endoplasmic reticulum protein OS=Homo sapiens GN=CHERP PE=1 SV=1|Calcium homeostasis endoplasmic reticulum protein OS=Homo sapiens GN=CHERP PE=1 SV=3	1	8	2	6	7.00818	35952800	30311700	35638300	43597000	31610500	38760600	26131700	40211400	44475100	37904400	60300300	30530400	45117400	36331400	44915900	52124900	TRUE	35412219.05	30774419.6	35102447.82	44262524.74	31135209.22	39352295.26	25738787.65	40825242.27	43806379.01	38483025.04	59393633.66	30996458.13	44439021.48	36886012.6	44240551.21	52920606.37	35529283.81	38809068.81	39795542.41	45677422.55	39460624.66	31902472.88	37963024.5	42588709.69	37948423.2
HSPA8	P11142	Heat shock cognate 71 kDa protein OS=Homo sapiens GN=HSPA8 PE=1 SV=1	1	8	2	17	8.0785	148707000	109388000	119131000	101542000	101174000	188252000	85379400	108984000	162847000	150626000	220169000	80020500	165299000	184193000	160440000	149016000	TRUE	142719448.3	113977187.5	114334299	105802021.9	97100321.18	196149792.5	81941676.34	113556238.4	156290114.1	156945257.6	211304096	83377623.98	158643386.5	191920504	153980029.7	155267712.8	143191246.4	143734587.7	129620460.3	109184094	123064512	159016479.1	120858601	118461358.7	135390404.9
SEC23IP	Q9Y6Y8	SEC23-interacting protein OS=Homo sapiens GN=SEC23IP PE=1 SV=1	1	8	2	5	6.5323	35847800	25075000	31301400	30237800	28974200	40158100	28425000	36207000	40816700	27729200	50844500	16532900	36716300	31638800	32654700	31678900	TRUE	32613735.7	27561503.33	28477496.15	33236260.24	26360248.07	44140283.43	25860594.99	39797381.9	37134358.75	30478900.82	46257485.38	18172346.1	33403882.64	34776187.1	29708706.11	34820263.52	32721549.31	34757317.71	32284854.08	34298691.99	33408860.29	35784042.22	38142682.35	41516450.36	32168610.9
IGF2BP2	F8W930|Q9Y6M1|Q9Y6M1-1	Insulin-like growth factor 2 mRNA-binding protein 2 OS=Homo sapiens GN=IGF2BP2 PE=1 SV=1|Insulin-like growth factor 2 mRNA-binding protein 2 OS=Homo sapiens GN=IGF2BP2 PE=1 SV=2|Isoform 2 of Insulin-like growth factor 2 mRNA-binding protein 2 OS=Homo sapiens GN=IGF2BP2	1	8	2	2	5.91599	8800160	6311070	7762240	8524610	6535860	10524300	5905140	7934120	9892780	10472600	14703700	5783720	10662000	10315300	10646000	10558500	TRUE	8591227.804	6464550.474	7577949.959	8731922.101	6380686.505	10780243.06	5764940.973	8127071.828	9657906.97	10727285.75	14354606.76	5924375.718	10408864.25	10566160.33	10393244.12	10815274.78	8619628.456	8152328.702	8591099.702	9011047.106	8086853.487	8739424.461	8502910.022	8478124.892	8366414.874
CRNKL1	Q5JY65|Q9BZJ0|Q9BZJ0-2|Q9BZJ0-3	Crooked neck-like protein 1 OS=Homo sapiens GN=CRNKL1 PE=1 SV=1|Crooked neck-like protein 1 OS=Homo sapiens GN=CRNKL1 PE=1 SV=4|Isoform 2 of Crooked neck-like protein 1 OS=Homo sapiens GN=CRNKL1|Isoform 3 of Crooked neck-like protein 1 OS=Homo sapiens GN=CRNKL1	1	8	2	3	6.39079	16083400	12179400	15978200	20335900	13817800	18805800	11078700	16840200	18259500	17739400	27526300	13077600	19333500	18395300	18408400	26081100	TRUE	16301584.82	12016387.61	16194957.7	20063718.81	14005250.06	18554098.08	11228991.87	16614806.21	18507205.45	17501971.07	27899717.37	12902565.86	19595775.16	18149092.33	18658125.4	25732023.5	16355474.17	15153650.98	18360176.17	20705076.53	17750191.17	15041603.22	16562026.9	17332491.34	16032351.46
CTSD	P07339	Cathepsin D OS=Homo sapiens GN=CTSD PE=1 SV=1	1	8	2	2	6.8254	23943500	11797500	25149200	16878700	10903100	29128400	20458100	16249600	29391900	21375200	89907700	21275400	15275900	22119200	27910500	21205400	TRUE	21105614.96	13383805.3	22168410.29	19148229.24	9610818.403	33045037.86	18033319.33	18434539.74	25908247.51	24249333.75	79251458.55	24136114.53	13465335.62	25093372.84	24602429.31	24056702.25	21175385.34	16878076.91	25132261.89	19760322.38	12180708.18	26789248.69	26597963.86	19230829.2	22443698
NENF	Q9UMX5	Neudesin OS=Homo sapiens GN=NENF PE=1 SV=1	1	8	2	6	7.04304	23909700	27510100	21424900	32985200	27205600	25395300	19374200	33548100	41479400	68264200	51729600	29837700	38816900	31705600	27331000	43238900	TRUE	25862635.95	25432760.96	23174878.35	30494425.93	29427743.91	23477653.46	20956677.89	31014820.3	44867422.91	63109442.75	55954855.67	27584599.54	41987450.84	29311450.92	29563386.54	39973849.89	25948131.96	32072798.88	26273291.8	31469212.09	37296590.78	19033075.4	30909726.1	32354521.48	38867580.27
RUVBL2	Q9Y230|Q9Y230-2	RuvB-like 2 OS=Homo sapiens GN=RUVBL2 PE=1 SV=3|Isoform 2 of RuvB-like 2 OS=Homo sapiens GN=RUVBL2	1	8	2	4	6.29424	15816300	12162700	15412500	14088000	12397700	18288400	9073140	13097700	20345400	16378500	28816000	10997900	21592200	22970100	20819300	23943000	TRUE	15257895.26	12607827.53	14868351.69	14603589.19	11959991.16	18957714.41	8752806.904	13577046.44	19627092.45	16977916.36	27798632.42	11400398.47	20829873.37	23810754.13	20084261.1	24819260.08	15308334.41	15899505.26	16856206.81	15070408.17	15158039.2	15368810.53	12909816.4	14163513.97	17002482.91
TOP1	P11387	DNA topoisomerase 1 OS=Homo sapiens GN=TOP1 PE=1 SV=2	1	8	2	3	5.953	7301800	5695530	7372020	9293740	5820390	9700340	4739330	8719380	8686160	12161800	15234600	7632900	10151100	8497290	10128900	12587900	TRUE	7670719.429	5421606.323	7744487.256	8846762.205	6114462.003	9233806.981	4978782.042	8300025.763	9125023.456	11576884.29	16004319.79	7265799.478	10663978.74	8088617.071	10640657.1	11982491.22	7696077.088	6837090.532	8779902.548	9129558.195	7749441.746	7485745.745	7343377.133	8658549.662	7904790.574
BYSL	Q13895	Bystin OS=Homo sapiens GN=BYSL PE=1 SV=3	1	8	2	2	5.81904	4055150	2946450	3742390	3500590	3148510	3369490	2780100	3598390	4806460	4491930	7564930	2904390	5299340	5153710	5359020	6176870	TRUE	3816333.427	3130831.45	3521992.541	3719648.141	2963087.422	3580344.232	2616373.885	3823568.22	4523397.153	4773023.712	7119414.876	3086139.441	4987250.381	5476216.244	5043415.697	6563403.03	3828949.36	3948235.41	3992872.642	3838550.577	3755403.722	2902545.684	3858979.967	3988729.223	3918511.261
MAPK14	B4E0K5|Q16539|Q16539-3|Q16539-4|Q16539-5	Mitogen-activated protein kinase OS=Homo sapiens GN=MAPK14 PE=1 SV=1|Mitogen-activated protein kinase 14 OS=Homo sapiens GN=MAPK14 PE=1 SV=3|Isoform Mxi2 of Mitogen-activated protein kinase 14 OS=Homo sapiens GN=MAPK14|Isoform Exip of Mitogen-activated protein kinase 14 OS=Homo sapiens GN=MAPK14|Isoform 5 of Mitogen-activated protein kinase 14 OS=Homo sapiens GN=MAPK14	1	8	2	2	5.91432	7943640	5632630	6475790	5841810	5350770	10391400	5476780	6585640	10394500	7663950	12734200	4391810	8736980	9804320	8355110	7380690	TRUE	7473206.3	5987200.564	6092284.472	6209548.315	5033889.763	11045532.18	5152437.27	7000201.952	9778922.872	8146390.898	11980062.5	4668271.715	8219563.573	10421495.86	7860308.459	7845299.856	7497911.026	7550351.289	6906805.085	6408043.009	6379929.33	8954491.437	7599507.212	7302579.29	8471248.069
MAP2K2	P36507	Dual specificity mitogen-activated protein kinase kinase 2 OS=Homo sapiens GN=MAP2K2 PE=1 SV=1	1	8	2	2	6.26258	14072500	7956730	8588460	6036340	8273150	15425000	8106240	8233550	15103100	12410900	12848400	5299910	10991100	15012000	9631770	7352080	TRUE	12954521.4	8643397.891	7906156.606	6557277.729	7615896.159	16756181.56	7462246.192	8944107.53	13903246.2	13481963.93	11827669.05	5757293.627	10117920.78	16307539.55	8866581.67	7986566.437	12997346.11	10900034.12	8963186.617	6766887.957	9652352.667	13584052.07	11006323.95	9330452.873	12044051.18
AP1B1	Q10567|Q10567-2|Q10567-3|Q10567-4	AP-1 complex subunit beta-1 OS=Homo sapiens GN=AP1B1 PE=1 SV=2|Isoform B of AP-1 complex subunit beta-1 OS=Homo sapiens GN=AP1B1|Isoform C of AP-1 complex subunit beta-1 OS=Homo sapiens GN=AP1B1|Isoform 4 of AP-1 complex subunit beta-1 OS=Homo sapiens GN=AP1B1	1	8	2	5	6.58891	31406900	22648000	20858300	27045400	20806700	32203600	17487900	22412900	34620000	25782100	40253400	15456900	34564100	34932200	28951700	29916400	TRUE	30268389.58	23499878.29	20102179.79	28062681.4	20052450.31	33414901.11	16853957.89	23255935.27	33365013.66	26751863.83	38794201.06	16038293.39	33311140.05	36246134.24	27902191.39	31041670.74	30368450.02	29635275.19	22789782.43	28959734.3	25414385.67	27089092.76	24858483.05	24260487.4	28903316.98
EPRS	P07814	Bifunctional glutamate/proline--tRNA ligase OS=Homo sapiens GN=EPRS PE=1 SV=5	1	8	2	12	7.26959	91690600	77473200	65045700	75841700	82618600	112521000	46195500	79295000	94091400	89521000	106500000	57014700	144812000	111195000	85614000	128839000	TRUE	93450560.38	76014142.27	66294223.35	74413368.42	84204427.36	110401884.8	47082202.12	77801632.2	95897442.67	87835045.28	108544220.2	55940938.51	147591602.1	109100857.5	87257322.74	126412566.9	93759486.74	95860072	75157567.08	76792069.42	106720313.9	89501593.57	69443161.71	81162313.87	83073671.48
SMARCA5	O60264	SWI/SNF-related matrix-associated actin-dependent regulator of chromatin subfamily A member 5 OS=Homo sapiens GN=SMARCA5 PE=1 SV=1	1	8	2	6	6.84654	30870700	26467500	29326200	41043600	29308900	31363200	23883200	35424900	34871800	37435500	49220100	25783700	40660100	31146900	31268600	51432500	TRUE	31454498.78	25976260.44	29880790.59	40281826.51	29863163.43	30781095.74	24334857.49	34767410.16	35531263.96	36740693.22	50150906.04	25305151.84	41429027.06	30568810.29	31859923.5	50477907.44	31558480.22	32758196.33	33875764.88	41569477.14	37848439.52	24953895.72	35892319.56	36269206.4	30779888.05
DIABLO	A0A024RBT2|F5GXT8|F5H796|Q9NR28|Q9NR28-2|Q9NR28-3	Diablo homolog, mitochondrial OS=Homo sapiens GN=DIABLO PE=1 SV=1|Diablo homolog, mitochondrial (Fragment) OS=Homo sapiens GN=DIABLO PE=1 SV=1|Diablo homolog, mitochondrial (Fragment) OS=Homo sapiens GN=DIABLO PE=1 SV=7|Diablo homolog, mitochondrial OS=Homo sapiens GN=DIABLO PE=1 SV=1|Isoform 2 of Diablo homolog, mitochondrial OS=Homo sapiens GN=DIABLO|Isoform 3 of Diablo homolog, mitochondrial O…	1	8	2	2	7.0413	11072500	8696320	8401780	13072700	8719300	10621900	9125660	9390810	11727400	8184470	17958700	7885900	11123500	7424830	12344700	14434100	TRUE	10399042.44	9259506.703	7890762.412	13919307.62	8188970.04	11309790.15	8570614.193	9998972.916	11014109.76	8714508.531	16866406.28	8396602.691	10446940.49	7905673.107	11593864.01	15368873.93	10433419.32	11676997.89	8945734.265	14364252.82	10378663.94	9168722.462	12641094.1	10430883.71	9541261.065
SAE1	Q9UBE0	SUMO-activating enzyme subunit 1 OS=Homo sapiens GN=SAE1 PE=1 SV=1	1	8	2	2	6.31969	18240600	10299300	11641800	8941050	11697200	23190500	8552070	11580700	20713100	12434200	19588200	5856810	18322400	19279000	12925300	11225700	TRUE	16447430.48	11422173.93	10497335.4	9915841.676	10547289.22	25718827.92	7711345.942	12843277.66	18676867.66	13789829.89	17662552.64	6495344.583	16521189.01	21380879.39	11654659.01	12449574.03	16501801.96	14404298.75	11900798.44	10232811.91	13367587.1	20849970.88	11373729.76	13398049.67	16179325.8
BAZ1B	Q9UIG0|Q9UIG0-2	Tyrosine-protein kinase BAZ1B OS=Homo sapiens GN=BAZ1B PE=1 SV=2|Isoform 2 of Tyrosine-protein kinase BAZ1B OS=Homo sapiens GN=BAZ1B	1	8	2	2	6.63726	11873500	11903000	14123800	20007800	11776900	17245300	11083000	15287400	14284500	17899700	22423700	12741500	15298100	11044500	14891600	19571100	TRUE	12374741.29	11420866.68	14720037.99	19197380.18	12274063.31	16546775.78	11550870.24	14668180.9	14887521.96	17174669.18	23370319.31	12225403.07	15943911.21	10597140.39	15520250.77	18778368.8	12415649.38	14402650.21	16688064.01	19811044.48	15556092.85	13414289.11	17036776.4	15301780.55	12896705.84
SF3A1	Q15459	Splicing factor 3A subunit 1 OS=Homo sapiens GN=SF3A1 PE=1 SV=1	1	8	2	3	6.88961	17600000	13806000	19830600	21749300	15623900	25014400	14245900	19142300	18016700	18961800	28972500	13882400	18361400	19035700	19138200	26229100	TRUE	17913276.41	13564553.71	20183580.64	21368937.27	15902002.24	24576935.55	14499474.12	18807529.8	18337393.59	18630186.48	29488204.6	13639617.59	18688229.18	18702794.08	19478856.06	25770392.27	17972493.64	17106015.49	22882066.33	22052017.66	20154126.38	19924251.3	21385773.83	19619930.76	15885247.49
DDX46	A0A0C4DG89|Q7L014	Probable ATP-dependent RNA helicase DDX46 OS=Homo sapiens GN=DDX46 PE=1 SV=1|Probable ATP-dependent RNA helicase DDX46 OS=Homo sapiens GN=DDX46 PE=1 SV=2	1	8	2	4	6.43017	21437400	18354500	18767700	23628100	17801500	25306600	16653100	19762400	22609600	23677700	32484200	17822100	27208100	26397000	24321800	31262300	TRUE	21794901.85	18053431.07	19080680.47	23240528.19	18098367.59	24891495.75	16930816.24	19438237.28	22986650.1	23289314.6	33025924.35	17529764.03	27661837.21	25964009.92	24727403.69	30749504.38	21866950.86	22766858.25	21631711.63	23983435.94	22937789.99	20179261.79	24971844.07	20277881.98	19912787.72
MSN	P26038	Moesin OS=Homo sapiens GN=MSN PE=1 SV=3	1	8	2	6	6.9897	32025400	23932500	29434200	26391800	28426400	44140800	21512800	28593400	37649200	36600000	48078900	21058800	37216300	41146800	36141800	36820900	TRUE	31214052.06	24554578.31	28688498.85	27077802.98	27706230.97	45288153.35	20967783.67	29336629.24	36695375.82	37551345.08	46860844.44	21606182.12	36273443.13	42216330.21	35226165.06	37777986.94	31317238.64	30965338.47	32524067.23	27943373.22	35114752.99	36714607.74	30926106.39	30603840.09	31788330.43
DCTN1	E7EX90|Q14203|Q14203-2|Q14203-3|Q14203-4|Q14203-5|Q14203-6	Dynactin subunit 1 OS=Homo sapiens GN=DCTN1 PE=1 SV=1|Dynactin subunit 1 OS=Homo sapiens GN=DCTN1 PE=1 SV=3|Isoform p135 of Dynactin subunit 1 OS=Homo sapiens GN=DCTN1|Isoform 3 of Dynactin subunit 1 OS=Homo sapiens GN=DCTN1|Isoform 4 of Dynactin subunit 1 OS=Homo sapiens GN=DCTN1|Isoform 5 of Dynactin subunit 1 OS=Homo sapiens GN=DCTN1|Isoform 6 of Dynactin subunit 1 OS=Homo sapiens GN=DCTN1	1	8	2	7	7.04169	55627000	38541300	40613800	42887300	38080100	61090800	30295200	36552300	59605700	54139500	69623900	27578400	54052600	57562200	53244500	52340100	TRUE	53484156.36	40085457.84	39049289.55	44605580.41	36613191.84	63538403.95	29128179.01	38016768.53	57309590.28	56308599.99	66941872.72	28683329.07	51970404.84	59868430.53	51193434.18	54437107	53660962.85	50551052.21	44270065.33	46031444.35	46403395.29	51509885.14	42962154.57	39658922.47	49645933.65
VPS35	Q96QK1	Vacuolar protein sorting-associated protein 35 OS=Homo sapiens GN=VPS35 PE=1 SV=2	1	8	2	9	6.91195	44439900	39173300	34973000	41023800	34135400	45861500	31218200	37945400	49012900	49050600	55976300	29509900	66811600	57843600	46568000	61382500	TRUE	44485794.94	39132885.84	35009118.08	40981476.72	34170653.05	45814185.78	31250440.34	37906252.63	49063517.67	48999995.66	56034109.06	29479455.34	66880599.13	57783924.13	46616092.72	61319173.13	44632854.89	49349780.73	39689734.75	42291492.4	43307732.57	37141056.44	46092350.91	39543632.79	42502557.26
AP2B1	P63010|P63010-2|P63010-3	AP-2 complex subunit beta OS=Homo sapiens GN=AP2B1 PE=1 SV=1|Isoform 2 of AP-2 complex subunit beta OS=Homo sapiens GN=AP2B1|Isoform 3 of AP-2 complex subunit beta OS=Homo sapiens GN=AP2B1	1	8	2	7	6.86083	42020000	37463600	42253500	48449500	34921000	46629800	28197900	46016900	51756700	52545000	73415600	32011800	57409700	45532600	50913600	65370900	TRUE	42031079.47	37453724.52	42264641.04	48436728.62	34930207.67	46617508.3	28205334.98	46004769.86	51770346.76	52531149.04	73434957.6	32003361.63	57424837.3	45520597.52	50927024.46	65353668.11	42170024.69	47232220.51	47915299.92	49985059.21	44270388.69	37792301.17	41601020.13	47991969.64	44847418.86
TARS	P26639|P26639-2	Threonine--tRNA ligase, cytoplasmic OS=Homo sapiens GN=TARS PE=1 SV=3|Isoform 2 of Threonine--tRNA ligase, cytoplasmic OS=Homo sapiens GN=TARS	1	8	2	6	6.7282	37963000	24227200	21550400	18586800	25790300	40651500	16761200	23025000	40957300	29037300	33629900	14502700	36633000	39182200	26048000	24378900	TRUE	35643981.5	25803435.95	20233966.2	19796068.19	24214866.48	43296310.61	15737320.62	24523020.1	38455370.85	30926483.89	31575574.47	15446254.23	34395226.26	41731417.08	24456824.55	25965005.64	35761812.43	32540250.45	22939188.3	20428870.17	30689813.28	35099842.74	23211516.28	25582304.62	33312972.23
HARS	B3KWE1|P12081|P12081-2|P12081-3|P12081-4	Histidine--tRNA ligase, cytoplasmic OS=Homo sapiens GN=HARS PE=1 SV=1|Histidine--tRNA ligase, cytoplasmic OS=Homo sapiens GN=HARS PE=1 SV=2|Isoform 2 of Histidine--tRNA ligase, cytoplasmic OS=Homo sapiens GN=HARS|Isoform 3 of Histidine--tRNA ligase, cytoplasmic OS=Homo sapiens GN=HARS|Isoform 4 of Histidine--tRNA ligase, cytoplasmic OS=Homo sapiens GN=HARS	1	8	2	2	6.47442	14619100	8747180	9969210	8157230	9078740	19170100	8800750	9036310	15631900	14851400	14833000	5757880	12275900	15586000	10492500	10541000	TRUE	13998095.48	9135235.53	9545728.082	8519113.282	8693084.343	20020552.75	8426903.076	9437192.349	14967872.76	15510260.1	14202909.22	6013319.716	11754432.23	16277449.53	10046789.25	11008635.67	14044370.01	11520281.75	10821964	8791435.632	11017576.15	16230441.89	12429129.62	9844836.745	12966311.82
AKR1B1	P15121	Aldose reductase OS=Homo sapiens GN=AKR1B1 PE=1 SV=3	1	8	2	15	8.34951	204102000	99545000	115210000	57677000	98796400	235777000	92732300	95445200	198931000	108988000	156459000	52287300	139379000	223389000	124020000	90505900	TRUE	179531374.9	113168707.1	101340553.8	65570661.73	86902889.37	268045389.2	81568810.28	108507809.4	174982880.8	123904074.1	137623832.1	59443328.56	122599991.7	253961970.2	109089970.3	102892517.9	180124864.9	142715027.6	114889489.3	67666696.39	110140332.6	217301448.4	120308648	113194860.3	151583503.7
LETM1	O95202	LETM1 and EF-hand domain-containing protein 1, mitochondrial OS=Homo sapiens GN=LETM1 PE=1 SV=1	1	8	2	3	6.38834	19236400	14868800	15682600	21551400	13661200	17992900	13051200	17535300	22590500	18288700	30262500	13340100	19974000	20022000	21362900	25005600	TRUE	18950678.33	15092978.69	15449663.56	21876333.06	13458287.77	18264181.13	12857348.21	17799681.84	22254959.29	18564440.94	29813005.71	13541230.3	19677322.63	20323874.11	21045593.05	25382612.45	19013324.98	19033484.83	17515238.38	22575632.88	17056973.62	14806570.73	18963745.76	18568548.28	19278941.39
TLN1	Q9Y490	Talin-1 OS=Homo sapiens GN=TLN1 PE=1 SV=3	1	8	2	33	7.52581	203907000	150694000	159378000	147481000	153624000	263400000	129885000	150637000	228455000	171536000	255315000	105616000	223609000	235687000	181618000	182060000	TRUE	193879912.6	158487597	151540617.6	155108427	146069569.4	277022529.5	123497930.2	158427649.1	217220769.4	180407504.2	242759934.1	111078251.6	212613070.5	247876267.7	172686969.9	191475784.8	194520835.6	199865867.2	171801154.9	160066629.8	185127917.8	224579117.3	182151351.2	165271013.2	188173181
ST13|ST13P4	A0A087X1H6|F6VDH7|H7C3I1|P50502|Q3KNR6|Q8IZP2	Hsc70-interacting protein OS=Homo sapiens GN=ST13 PE=1 SV=1|Hsc70-interacting protein (Fragment) OS=Homo sapiens GN=ST13 PE=1 SV=1|Hsc70-interacting protein (Fragment) OS=Homo sapiens GN=ST13 PE=1 SV=1|Hsc70-interacting protein OS=Homo sapiens GN=ST13 PE=1 SV=2|Hsc70-interacting protein OS=Homo sapiens GN=ST13 PE=1 SV=1|Putative protein FAM10A4 OS=Homo sapiens GN=ST13P4 PE=5 SV=1	1	8	2	4	6.64973	32074300	20924900	24659400	19337200	20576900	41382900	17040300	21537300	33942300	24346700	44524600	14569000	38371800	39726600	31813800	26309900	TRUE	29493787.31	22755691.33	22675447.28	21029078	18921401.62	45003631.97	15669336.01	23421672.31	31211498.83	26476876.36	40942408.17	15843691.82	35284626.88	43202416.6	29254245.63	28611843.46	29591287.08	28696794.36	25707088.25	21701294.44	23980899.64	36483949.39	23111243.42	24433383.53	27037778.36
RAB5C	P51148|P51148-2	Ras-related protein Rab-5C OS=Homo sapiens GN=RAB5C PE=1 SV=2|Isoform 2 of Ras-related protein Rab-5C OS=Homo sapiens GN=RAB5C	1	8	2	3	6.42738	12427300	8886570	11166500	12385400	10072300	13882200	9164410	15395300	16341500	13665100	24027500	10688900	13903500	13788600	13304200	15967700	TRUE	12267658.98	9002212.367	11023055.21	12546573.2	9942911.294	14062851.3	9046684.044	15595641.52	16131577.19	13842926.15	23718842.88	10827996.38	13724895.72	13968033.27	13133294.33	16175490.25	12308213.08	11352528.62	12496805.44	12947637.52	12601601.22	11400598.86	13343265.92	16269303.31	13974401.26
POGZ	Q7Z3K3|Q7Z3K3-2|Q7Z3K3-3|Q7Z3K3-5|Q7Z3K3-6|Q7Z3K3-7	Pogo transposable element with ZNF domain OS=Homo sapiens GN=POGZ PE=1 SV=2|Isoform 2 of Pogo transposable element with ZNF domain OS=Homo sapiens GN=POGZ|Isoform 3 of Pogo transposable element with ZNF domain OS=Homo sapiens GN=POGZ|Isoform 5 of Pogo transposable element with ZNF domain OS=Homo sapiens GN=POGZ|Isoform 6 of Pogo transposable element with ZNF domain OS=Homo sapiens GN=POGZ|Isoform…	1	8	2	3	6.50517	16296600	13749600	16613900	23566800	16199700	17641200	11728700	19719000	18952300	18233900	28634000	16566300	19806300	14508800	18661900	25622600	TRUE	16506041.6	13575134.29	16827419.49	23267765.96	16407896.25	17417354.62	11879435.59	19468789.86	19195872.28	18002533.98	29002000.12	16356093.79	20060847.77	14324700.97	18901740.1	25297480.36	16560606.83	17119358.47	19077196.26	24011544.39	20795294.19	14120057.8	17521388.76	20309754.29	16628927.15
ACAT1	P24752	Acetyl-CoA acetyltransferase, mitochondrial OS=Homo sapiens GN=ACAT1 PE=1 SV=1	1	8	2	2	6.94158	12127600	8572600	12580400	12914400	9003110	14741500	10774000	12215300	12278600	10201900	20545000	8701720	10945600	12289500	13301600	14793100	TRUE	11736593.01	8858197.919	12174794.24	13344645.87	8712839.958	15232616.08	10426634.54	12622255.21	11882724.6	10541778.38	19882606.89	8991619.579	10592701.97	12698927.2	12872741.97	15285935.15	11775391.52	11170914.58	13802528.62	13771221.41	11042614.32	12348914.3	15378602.44	13167480.04	10293721.42
CDH6	P55285	Cadherin-6 OS=Homo sapiens GN=CDH6 PE=1 SV=1	1	8	2	2	6.12381	5312930	6407420	5350230	10832700	6435030	5919440	3633460	8204160	7900630	12209500	10090200	7053000	8637020	5707530	6546430	11569800	TRUE	5966417.739	5705630.317	6008305.621	9646219.78	7226535.48	5271097.622	4080373.767	7305577.6	8872403.548	10872222.11	11331289.57	6280501.454	9699369.151	5082397.627	7351637.624	10302586.95	5986141.364	7195268.1	6811598.507	9954571.265	9158878.687	4273220.859	6018283.822	7621145.796	7685951.961
FXR1	P51114|P51114-2	Fragile X mental retardation syndrome-related protein 1 OS=Homo sapiens GN=FXR1 PE=1 SV=3|Isoform 2 of Fragile X mental retardation syndrome-related protein 1 OS=Homo sapiens GN=FXR1	1	8	2	4	6.58788	17145900	14422600	14193000	17084200	12462600	16925500	9897020	13884000	19035900	19073000	26272300	11361100	21967700	20484200	18519300	22149400	TRUE	17070773.03	14486072.6	14130811.54	17159386.06	12407993.51	16999987.64	9853654.93	13945102.27	18952491.75	19156938.6	26157184.53	11411099.2	21871445.69	20574349.17	18438155.3	22246877.57	17127205.13	18268126.44	16020059.71	17707903.75	15725835.38	13781702.98	14533495.08	14547468.16	16418092.38
BLVRA	P53004	Biliverdin reductase A OS=Homo sapiens GN=BLVRA PE=1 SV=2	1	8	2	2	6.37715	9167000	5732000	5351100	4336620	5524860	11372600	5606330	5721040	10437500	8507190	8480210	4073080	7784280	11067300	6851380	6899300	TRUE	8875792.118	5920062.492	5181111.727	4478901.152	5349351.897	11745726.22	5428233.841	5908742.902	10105932.17	8786304.331	8210819.36	4206714.608	7536996.953	11430409.56	6633732.366	7125660.703	8905133.474	7465684.67	5873811.209	4622073.903	6779744.626	9522131.04	8006289.074	6163974.103	8754528.441
KTN1	Q86UP2	Kinectin OS=Homo sapiens GN=KTN1 PE=1 SV=1	1	8	2	23	7.50858	141015000	126063000	203760000	248442000	134713000	173459000	136146000	203700000	157847000	148773000	345655000	145946000	172256000	119702000	187079000	254421000	TRUE	138950043.2	127936440.6	200776235.2	252134132.7	132740326.7	176036799.4	134152342.5	206727215.3	155535563.4	150983937.2	340593392.1	148114924.7	169733564.8	121480908.8	184339503.8	258201987.5	139409380.5	161338351.5	227619430.5	260193863.5	168234495.3	142711096.9	197865911	215656904.1	134736755.6
2-Sep	B5MCX3|C9J2Q4|Q15019|Q15019-2	Septin-2 OS=Homo sapiens GN=SEPT2 PE=1 SV=1|Septin-2 (Fragment) OS=Homo sapiens GN=SEPT2 PE=1 SV=1|Septin-2 OS=Homo sapiens GN=SEPT2 PE=1 SV=1|Isoform 2 of Septin-2 OS=Homo sapiens GN=SEPT2	1	8	2	3	6.48128	15145000	10998800	12130300	11486000	12345200	16018200	9942510	12156900	16839100	14990800	21178600	8788050	18835800	19334400	15649100	16024300	TRUE	14353369.14	11605416.43	11496247.85	12119486.95	11699915	16901651.22	9422813.877	12827389.08	15958918.34	15817587.07	20071592.18	9272737.013	17851250.6	20400749.48	14831119.77	16908087.65	14400818.12	14635382.59	13033262.55	12506899.01	14828419.85	13701982.72	13898032.77	13381474.77	13824831.01
NUP205	Q92621	Nuclear pore complex protein Nup205 OS=Homo sapiens GN=NUP205 PE=1 SV=3	1	8	2	12	7.03159	57835200	46236500	55693400	70569900	49344400	59248700	40757300	57917200	70139900	88934000	91323000	45476200	65833900	64865900	58301400	82817000	TRUE	59386823.25	45028460.5	57187562.28	68726092.04	50668229.06	57700685.55	41850751.29	56403974.19	72021638.1	86610385.86	93773045.82	44288025.16	67600115.21	63171122.73	59865530.63	80653207.17	59583142.62	56784584.24	64833372.07	70922993.32	64216686.48	46777311.06	61727114.68	58840372.97	62390630.41
RUFY1	H0YA47|Q96T51|Q96T51-2	RUN and FYVE domain-containing protein 1 (Fragment) OS=Homo sapiens GN=RUFY1 PE=1 SV=1|RUN and FYVE domain-containing protein 1 OS=Homo sapiens GN=RUFY1 PE=1 SV=2|Isoform 2 of RUN and FYVE domain-containing protein 1 OS=Homo sapiens GN=RUFY1	1	8	2	2	6.28762	16109000	13377800	15027300	15423200	13469400	19768000	12262800	14178600	17753800	17683500	22229400	10367300	18196800	17094200	15746000	20402600	TRUE	15907770.34	13547026.11	14839582.67	15618299.96	13301143.57	20018060.69	12109616.12	14357956.05	17532023.9	17907192.24	21951715.81	10498443.98	17969490.05	17310437.73	15549304.85	20660688.23	15960357.82	17083911.75	16823591.46	16117555.22	16857809.76	16228421.59	17860889.95	14978155.38	15187574.91
ETF1	B7Z7P8|P62495|P62495-2	Eukaryotic peptide chain release factor subunit 1 OS=Homo sapiens GN=ETF1 PE=1 SV=1|Eukaryotic peptide chain release factor subunit 1 OS=Homo sapiens GN=ETF1 PE=1 SV=3|Isoform 2 of Eukaryotic peptide chain release factor subunit 1 OS=Homo sapiens GN=ETF1	1	8	2	4	6.34684	25291700	17058500	17258400	14122400	19752400	34152900	15715200	19459300	31669600	27189100	29637900	14574200	30567800	33379200	22077400	21777100	TRUE	24328647.9	17733762.52	16601238.23	14681436.7	19000272.22	35504846.15	15116799.88	20229598.45	30463691.55	28265383.4	28509354.2	15151121.25	29403845.66	34700519.16	21236741.35	22639148.8	24409072.9	22363729.98	18820775.22	15150744.15	24080859.87	28783388.21	22296288.86	21103426.4	26389970.72
VPS29	F8VXU5|Q9UBQ0|Q9UBQ0-2	Vacuolar protein sorting-associated protein 29 OS=Homo sapiens GN=VPS29 PE=1 SV=1|Vacuolar protein sorting-associated protein 29 OS=Homo sapiens GN=VPS29 PE=1 SV=1|Isoform 2 of Vacuolar protein sorting-associated protein 29 OS=Homo sapiens GN=VPS29	1	8	2	4	7.21792	38362500	26595700	23266000	26926600	30158600	43738000	21055800	28027800	37980800	31476600	40009700	17937500	45556400	45202800	30500200	33574200	TRUE	37265327.09	27378735.7	22600589.12	27719378.13	29296059.78	45025742.59	20453601.15	28852999.87	36894543.76	32403340.1	38865416.94	18465619.32	44253480.53	46533669.51	29627889.98	34562698.04	37388517.81	34526832.74	25622221.77	28605456.98	37129694.9	36501874.22	30167720.88	30099320.09	31960864.88
KPNB1	Q14974	Importin subunit beta-1 OS=Homo sapiens GN=KPNB1 PE=1 SV=2	1	8	2	20	8.24762	180256000	173866000	142607000	170389000	152734000	168546000	102695000	169437000	226605000	180865000	252431000	127714000	272874000	229308000	213991000	246599000	TRUE	178041418	176028645.8	140854964.6	172508396.8	150857546.7	170642472.5	101433313.8	171544555.3	223820985.2	183114703.4	249329693.2	129302580.5	269521535.4	232160265.4	211361957.8	249666340.9	178629982.5	221986569.3	159686861.3	178022807.8	191196178.7	138337975.4	149607488.5	178954511	193890790.8
DDX39A	O00148	ATP-dependent RNA helicase DDX39A OS=Homo sapiens GN=DDX39A PE=1 SV=2	1	8	2	4	7.17084	15290200	12370400	17093000	20605700	15389500	19431600	17293000	23620000	17141800	19421700	27819800	13658400	18974300	15293100	15862800	24851700	TRUE	15450379.85	12242151.45	17272065.95	20392073.02	15550720.12	19230145.35	17474161.15	23375122.64	17321377.18	19220347.99	28111239.71	13516798.27	19173074.42	15134550.72	16028978.4	24594053.15	15501455.31	15438357.7	19581290.65	21043926.92	19708913	15589667.3	25773242.2	24384823.14	15005096.67
PCBP1	Q15365	Poly(rC)-binding protein 1 OS=Homo sapiens GN=PCBP1 PE=1 SV=2	1	8	2	5	7.05388	23149600	18821700	18286700	16780900	18912200	28589000	15383700	18071000	28068600	22219400	27958400	13357600	27369000	28337700	20163100	22510400	TRUE	22372810.46	19475194.1	17673086.06	17363537.02	18277597.28	29581617.18	14867496.82	18698429.61	27126752.42	22990863.09	27020250.2	13821379.19	26450627.64	29321591.98	19486523.08	23291966.68	22446769.9	24559818.12	20035925.97	17918580.6	23164944.9	23981491.64	21928583.18	19506117.93	23499259.79
PPP2CB	P62714	Serine/threonine-protein phosphatase 2A catalytic subunit beta isoform OS=Homo sapiens GN=PPP2CB PE=1 SV=1	1	8	2	3	6.573	19462900	15241800	14307300	15852900	16529300	25850400	11242200	15787900	24894000	20840000	24538500	11762700	26082800	23805700	19507200	20920500	TRUE	19113799.28	15520181.25	14050673.87	16142442.58	16232818.46	26322540.21	11040551.73	16076255.4	24447483.12	21220628.62	24098359.63	11977537.82	25614959.94	24240495.14	19157304.68	21302598.9	19176985.17	19572222.32	15929207.86	16658452.61	20573401.38	21339393.8	16284090.05	16770677.55	21178272.59
EIF3I	Q13347	Eukaryotic translation initiation factor 3 subunit I OS=Homo sapiens GN=EIF3I PE=1 SV=1	1	8	2	6	7.35723	37141200	36535500	30984600	39679400	32963900	47172000	24566200	35079000	43902300	41270600	51420500	28556400	50108800	45635900	42400700	49931900	TRUE	37999502.13	35710265.57	31700628.24	38783153.69	33725668.21	46106516.88	25133904.38	34286663.82	44916845.51	40338412.95	52608784.83	27911391.05	51266772.54	44605113.07	43380544.79	48804078.48	38125119.87	45033575.68	35938909.51	40022897.69	42743760.78	37378046.05	37070861.33	35767693.96	38910393.89
TGM2	P21980	Protein-glutamine gamma-glutamyltransferase 2 OS=Homo sapiens GN=TGM2 PE=1 SV=2	1	8	2	13	7.24512	136228000	55816400	82202700	39196000	55683600	165435000	74326600	51961800	147192000	77041600	108525000	30095300	71694000	138641000	83543400	53631700	TRUE	115682480.3	65729542.77	69805122.49	46157315.03	47285557.76	194816701	63116873.5	61190355.44	124992921	90724395.38	92157568.04	35440306.23	60881314.75	163264014.5	70943621.93	63156834.18	116064900.4	82890347.95	79137863.17	47632781.79	59929504.03	157935756.5	93093250.85	63833504.44	108278391.7
NPM1	P06748|P06748-2	Nucleophosmin OS=Homo sapiens GN=NPM1 PE=1 SV=2|Isoform 2 of Nucleophosmin OS=Homo sapiens GN=NPM1	1	8	2	8	8.70408	76857100	77815200	92491100	110522000	75580600	94445300	62937500	103004000	83642500	81718900	146292000	75385800	112769000	84534500	110160000	154504000	TRUE	78164043.51	76514089.33	94063897.35	108674014.6	76865836.82	92866125.4	64007742.79	101281719.5	85064828.23	80352517.43	148779673.6	74125310.16	114686620	83121039.14	112033254.4	151920612.7	78422436.12	96490546.27	106639965.3	112147892.9	97419417.18	75285546.31	94407224.66	105656635.6	73689635.49
P4HA2	O15460|O15460-2	Prolyl 4-hydroxylase subunit alpha-2 OS=Homo sapiens GN=P4HA2 PE=1 SV=1|Isoform IIa of Prolyl 4-hydroxylase subunit alpha-2 OS=Homo sapiens GN=P4HA2	1	8	2	9	7.13019	59920300	46381500	64308100	79129800	46510300	74304400	40767000	61026400	63504200	55685600	108190000	52074100	60445500	50166800	69352500	84442800	TRUE	59812155.76	46465360.75	64192036.65	79272871.79	46426358.15	74438747.15	40693423.66	61136739.67	63389587.53	55786283.16	107994738.5	52168253.34	60336407.88	50257504.81	69227332.51	84595478.04	60009881.19	58596633.38	72774324.18	81806911.89	58840558.29	60346673.47	60020132.29	63777572.71	54912890.51
CSNK2A1	E7EU96|P68400|Q5U5J2	Casein kinase II subunit alpha OS=Homo sapiens GN=CSNK2A1 PE=1 SV=1|Casein kinase II subunit alpha OS=Homo sapiens GN=CSNK2A1 PE=1 SV=1|CSNK2A1 protein OS=Homo sapiens GN=CSNK2A1 PE=1 SV=1	1	8	2	3	6.1336	13113500	8862550	10070500	10583400	8110210	14001000	6834940	10961800	18367000	13608900	21461300	6864460	16751700	15824600	15408500	15980700	TRUE	12486462.63	9307603.992	9588967.241	11114870.56	7722410.805	14704093.46	6508119.334	11512272.82	17488760.37	14292303.23	20435102.79	7209175.158	15950697.83	16619269.86	14671724.52	16783208.8	12527740.04	11737652.52	10870984.11	11470169	9787348.852	11920446.82	9599049.386	12009551.38	15150096.74
RPL11	P62913|P62913-2	60S ribosomal protein L11 OS=Homo sapiens GN=RPL11 PE=1 SV=2|Isoform 2 of 60S ribosomal protein L11 OS=Homo sapiens GN=RPL11	1	8	2	3	6.56694	23638300	16595800	22520600	19879700	17738900	34531600	18805200	20946600	24809600	21841800	31663600	14560900	28520000	24756200	24723600	26649700	TRUE	22661468.96	17311168.13	21589956.89	20736621.86	17005856.25	36020097.45	18028092.38	21849510.98	23784366.06	22783298.9	30355130.81	15188553.01	27341437.19	25823325.2	23701919.93	27798445.22	22736382.64	21830803.76	24476470.97	21399489.62	21553146.01	29201096.77	26590254.45	22793311.88	20603830.07
NUP93	H3BVG0|Q8N1F7	Nuclear pore complex protein Nup93 OS=Homo sapiens GN=NUP93 PE=1 SV=1|Nuclear pore complex protein Nup93 OS=Homo sapiens GN=NUP93 PE=1 SV=2	1	8	2	13	7.00825	64740100	51417700	63362600	74434800	56391100	61343400	43219300	67272400	71246100	71813100	103253000	48827100	80628400	69294200	71729700	89216100	TRUE	63867939.97	52119843.56	62508997.26	75451257.67	55631415.3	62181085.72	42637062.01	68191050.24	70286293.01	72793756.58	101862005.2	49493867.16	79542197.36	70240459.29	70763378.09	90434406.34	64079072.9	65727400.28	70866267.34	77863135.88	70507006.49	50409522.19	62886871.44	71136597.86	60887342.27
UCHL1	P09936	Ubiquitin carboxyl-terminal hydrolase isozyme L1 OS=Homo sapiens GN=UCHL1 PE=1 SV=2	1	8	2	6	7.72642	124158000	66136000	59526000	34107800	60867100	160209000	58228000	54199800	112244000	58272000	71855600	26850100	72506400	111985000	52238700	39301600	TRUE	111082960.4	73920549.66	53257335.8	38122464.68	54457204.99	179066428.9	52096027.77	60579397.11	100423619.9	65130916.14	64288509.53	30010495.8	64870773.99	125166214.4	46737459.06	43927601.83	111450175.4	93219879.89	60377685.81	39341089.06	69018817.59	145167184.1	76838225.87	63196155.45	86994591.08
SERPINE1	P05121	Plasminogen activator inhibitor 1 OS=Homo sapiens GN=SERPINE1 PE=1 SV=1	1	8	2	2	6.19363	5515240	5008140	6482240	9215950	6826130	6785910	4271120	10488800	7630220	9273760	12254700	7928770	10108900	5801340	6946720	13553800	TRUE	5878532.603	4698637.554	6909229.55	8646405.406	7275771.817	6366541.584	4552461.574	9840593.43	8132827.772	8700642.755	13061925.41	7438772.974	10774780.11	5442817.89	7404305.162	12716176.8	5897965.699	5925367.58	7832973.329	8922796.781	9221280.601	5161285.228	6714582.39	10265662.94	7045275.074
RABGGTB	P53611	Geranylgeranyl transferase type-2 subunit beta OS=Homo sapiens GN=RABGGTB PE=1 SV=2	1	8	2	3	6.00565	19377200	12287100	11713600	8733310	14457600	23379900	12750100	12962600	23014900	16519200	20122700	6842380	17562400	22412800	14680900	12686100	TRUE	17572196.3	13549222.31	10622467.57	9630389.489	13110861.49	25781466.96	11562416.66	14294109.2	20871041.25	18216040.66	18248252.3	7545224.484	15926446.56	24715027.13	13313360.89	13989207.31	17630285.99	17086681.34	12042660.41	9938234.943	16616647.1	20900751.66	17053806.61	14911550.62	18080086.14
COPB1	P53618	Coatomer subunit beta OS=Homo sapiens GN=COPB1 PE=1 SV=3	1	8	2	6	6.66793	34999200	28367900	25619600	26600100	29028400	32389000	20588100	30710100	40378200	34856800	44807900	20524300	50044900	41834700	34317400	39452200	TRUE	33646495.02	29508387.28	24629412.78	27669515.63	27906464.04	33691149.35	19792378.23	31944751.79	38817598.84	36258163.41	43076092.72	21349447.55	48110684.78	43516599.02	32991046.32	41038314.31	33757722.7	37212498.16	27922293.22	28554000.58	35368527.48	27313044.17	29192460.42	33324621.83	33626761.71
ZYX	H0Y2Y8|Q15942|Q15942-2	Zyxin (Fragment) OS=Homo sapiens GN=ZYX PE=1 SV=1|Zyxin OS=Homo sapiens GN=ZYX PE=1 SV=1|Isoform 2 of Zyxin OS=Homo sapiens GN=ZYX	1	8	2	2	6.60316	11730100	7308590	8795700	5946980	8156390	17846800	7434090	7431830	12975600	13996600	11057900	4001360	7974380	14319200	8926830	8522000	TRUE	11380877.33	7532854.372	8533838.819	6129463.316	7913562.037	18394429.76	7212765.991	7659875.997	12589296.93	14426086.22	10728689.73	4124141.889	7736970.747	14758585.22	8661064.882	8783497.906	11418499.93	9499547.596	9674788.106	6325398.01	10029613.07	14912161.86	10638357.01	7990748.295	10905808.2
ARCN1	B0YIW6|P48444	Archain 1, isoform CRA_a OS=Homo sapiens GN=ARCN1 PE=1 SV=1|Coatomer subunit delta OS=Homo sapiens GN=ARCN1 PE=1 SV=1	1	8	2	3	6.66022	11633400	9440630	9296580	10583300	8996320	15635800	7729040	8947250	15356200	15312200	15272000	6944270	14983200	15701600	11422700	13832700	TRUE	11682344.35	9401077.537	9335692.818	10538960.21	9034169.556	15570292.25	7761557.822	8909764.602	15420807.01	15248048.01	15336252.76	6915176.287	15046237.72	15635816.58	11470757.89	13774746.52	11720963.53	11855530.33	10583847.64	10875849.07	11449866.02	12622664.65	11447788.99	9294626.484	13358677.98
KHDRBS1	Q07666|Q07666-2	KH domain-containing, RNA-binding, signal transduction-associated protein 1 OS=Homo sapiens GN=KHDRBS1 PE=1 SV=1|Isoform 2 of KH domain-containing, RNA-binding, signal transduction-associated protein 1 OS=Homo sapiens GN=KHDRBS1	1	8	2	3	6.69123	17703100	17954800	16119400	28404500	15448000	17679600	11677100	20329900	20140400	20423000	36490600	17241000	28423200	22582000	24584100	32972100	TRUE	18376946.79	17296432.51	16732965.19	27362962.4	16036009.17	17031323.56	12121574.49	19584442.23	20907019.62	19674128.43	37879569.93	16608806.17	29505094.24	21753962.12	25519863.61	31763077.42	18437696.81	21812220.94	18970113.69	28237648.06	20323966.17	13807106.66	17878527.75	20430402.32	18111253.35
GNAS	P63092|P63092-4|Q5JWF2|Q5JWF2-2	Guanine nucleotide-binding protein G(s) subunit alpha isoforms short OS=Homo sapiens GN=GNAS PE=1 SV=1|Isoform 4 of Guanine nucleotide-binding protein G(s) subunit alpha isoforms short OS=Homo sapiens GN=GNAS|Guanine nucleotide-binding protein G(s) subunit alpha isoforms XLas OS=Homo sapiens GN=GNAS PE=1 SV=2|Isoform XLas-2 of Guanine nucleotide-binding protein G(s) subunit alpha isoforms XLas OS…	1	8	2	4	6.60561	13367900	10507300	19067700	24953000	12991300	17912000	12020600	20530800	19685000	18499700	28510900	41481700	17631700	13244200	19874100	28611100	TRUE	14477481.13	9702000.952	20650383.89	23040555.59	14069622.05	16539190.95	13018350.65	18957281.24	21318921.89	17081848.53	30877401.58	38302465.23	19095191.01	12229139.84	21523717.83	26418291.99	14525340.4	12235019.46	23411279.81	23777071	17831775.94	13408140.17	19201213.8	19776150.79	18468074.48
SPATA20	A0A0U1RRL8|Q8TB22|Q8TB22-2|Q8TB22-3	Spermatogenesis-associated protein 20 OS=Homo sapiens GN=SPATA20 PE=1 SV=1|Spermatogenesis-associated protein 20 OS=Homo sapiens GN=SPATA20 PE=2 SV=3|Isoform 2 of Spermatogenesis-associated protein 20 OS=Homo sapiens GN=SPATA20|Isoform 3 of Spermatogenesis-associated protein 20 OS=Homo sapiens GN=SPATA20	1	8	2	2	6.24019	13731700	8712860	13100400	13617900	9475460	16233000	10588100	11950600	15063200	11968600	22505800	8481900	13532100	13911600	14434200	16082000	TRUE	13040119.44	9174945.078	12440614.1	14340123.06	8998239.85	17093914.45	10054843.07	12584398.08	14304560.04	12603352.71	21372322.44	8931736.153	12850572.05	14649399.39	13707238.87	16934906.19	13083227.12	11570358.74	14103887.82	14798520.06	11404328.87	13857848.41	14830234.4	13127987.65	12391699.8
NUTF2	P61970	Nuclear transport factor 2 OS=Homo sapiens GN=NUTF2 PE=1 SV=1	1	8	2	3	7.71192	41845500	30443600	31509800	21735300	32784700	54964200	29620000	32697600	42422300	32355000	38459300	17652400	37708200	43774600	30832500	29509800	TRUE	39265513.09	32443932.69	29567061.32	23163443.55	30763357.28	58575687.67	27793777.06	34846034.42	39806750.45	34480923.48	36088089.46	18812271.79	35383298.58	46650861.79	28931520.29	31448776.26	39395315.98	40914461.84	33520090.93	23903887.21	38989341.18	47486665.65	40993999.17	36351226.87	34483640.21
TPI1	P60174|P60174-1	Triosephosphate isomerase OS=Homo sapiens GN=TPI1 PE=1 SV=3|Isoform 2 of Triosephosphate isomerase OS=Homo sapiens GN=TPI1	1	8	2	6	7.35663	35353900	24385500	22785800	16918400	25958900	43248900	17586200	22607600	38787300	29845100	34791700	12432600	38741600	48256800	22579500	21100100	TRUE	33114917.33	26034264.85	21342762.28	18062295.48	24314908.04	46173066.67	16472455.92	24136156.57	36330878.15	31863002.11	32588321.78	13273199.29	36288072.36	51519563.36	21149527.38	22526730.72	33224387.74	32831344.65	24196227.16	18639675.61	30816605.51	37431997.23	24295792.64	25178730.32	31472574.78
MAP4	E7EVA0|P27816|P27816-2|P27816-6	Microtubule-associated protein OS=Homo sapiens GN=MAP4 PE=1 SV=1|Microtubule-associated protein 4 OS=Homo sapiens GN=MAP4 PE=1 SV=3|Isoform 2 of Microtubule-associated protein 4 OS=Homo sapiens GN=MAP4|Isoform 6 of Microtubule-associated protein 4 OS=Homo sapiens GN=MAP4	1	8	2	3	6.35738	22360800	13111600	13188700	9990660	13516600	26660900	9127680	11653400	22536200	15309800	23916700	8148750	23372000	24533500	18695400	16670500	TRUE	20465075.43	14326156.1	12070576.2	10916116.63	12370677.19	29130557.31	8353845.108	12732879.86	20625605.21	16727980.16	21889067.9	8903586.485	21390546.98	26806091.61	17110424.1	18214724.77	20532728.33	18066458.62	13684376.93	11265061.69	15678540.84	23615822.37	12321373.91	13282883.18	17867470.74
GLRX3	O76003	Glutaredoxin-3 OS=Homo sapiens GN=GLRX3 PE=1 SV=2	1	8	2	2	6.28325	15903500	10131900	10961100	9635100	10544400	17808400	6401220	10529400	18943900	11476900	19376600	7630390	16211900	17919100	12633400	13069700	TRUE	15074050.81	10689407.49	10389422.35	10165271.09	9994455.392	18788306.68	6067363.505	11108779.92	17955878.33	12108416.08	18366010.81	8050251.981	15366366.16	18905097.94	11974503.31	13788859.85	15123882.2	13480220.14	11778457.72	10490214.59	12666927.98	15231473.55	8948963.431	11588629.4	15554749.91
ABR	A0A0G2JQ41|Q12979|Q12979-2|Q12979-4	Active breakpoint cluster region-related protein (Fragment) OS=Homo sapiens GN=ABR PE=1 SV=1|Active breakpoint cluster region-related protein OS=Homo sapiens GN=ABR PE=2 SV=2|Isoform Short of Active breakpoint cluster region-related protein OS=Homo sapiens GN=ABR|Isoform 4 of Active breakpoint cluster region-related protein OS=Homo sapiens GN=ABR	1	8	2	9	6.73658	42185300	31762800	38674800	41603900	34443400	50398100	30223300	46691200	46713600	45483900	65041000	33552800	55114800	44580500	43729000	57234200	TRUE	42114836.27	31815943.4	38610199.99	41673508.87	34385867.86	50482422.74	30172816.86	46769320.6	46635572.47	45560000.63	64932359.51	33608938.31	55022739.62	44655089.12	43655957.77	57329960.44	42254058.37	40122515.8	43772270.79	43005646.08	43580494.85	40925544.79	44502926.92	48789545.55	40399286.14
IVD	A0A0A0MT83|P26440|P26440-2	Isovaleryl-CoA dehydrogenase, mitochondrial OS=Homo sapiens GN=IVD PE=1 SV=1|Isovaleryl-CoA dehydrogenase, mitochondrial OS=Homo sapiens GN=IVD PE=1 SV=1|Isoform 2 of Isovaleryl-CoA dehydrogenase, mitochondrial OS=Homo sapiens GN=IVD	1	8	2	3	6.59669	16714900	15195200	16514800	21999000	15475000	19965300	13991800	22029700	19989400	20676600	28259100	15220100	19528200	17301600	19945300	25591400	TRUE	17184496.6	14779964.43	16978774.89	21397838.63	15909762.24	19419713.06	14384892.49	21427699.7	20550992.01	20111575.53	29053025.01	14804183.99	20076834.83	16828803.35	20505653.04	24892069.98	17241304.65	18638748.16	19248787.43	22081842.88	20163961.38	15743347.75	21216773.44	22353280.25	17802835.1
AIFM1	O95831|O95831-3	Apoptosis-inducing factor 1, mitochondrial OS=Homo sapiens GN=AIFM1 PE=1 SV=1|Isoform 3 of Apoptosis-inducing factor 1, mitochondrial OS=Homo sapiens GN=AIFM1	1	8	2	3	6.55491	18536800	16489000	21833100	34570000	15200200	29149600	14686600	20782600	23226000	20951900	41869000	18783200	19363800	20756000	25417700	30194800	TRUE	19338978.9	15805037.94	22777926.08	33136039.88	15857987.74	27940477.52	15322161.73	19920539.84	24231103.75	20082817.29	43680878.45	18004074.75	20201767.28	19895043.21	26517649.43	28942322.73	19402909.18	19931449.98	25823268.17	34195267.98	20098342.6	22651037.78	22599184.12	20781017.85	20990828.29
NUDT21	O43809	Cleavage and polyadenylation specificity factor subunit 5 OS=Homo sapiens GN=NUDT21 PE=1 SV=1	1	8	2	2	6.4247	13793600	11202400	13603600	16099300	10074700	16525800	9548850	14526600	16009100	18379300	23043200	10848200	16410600	13998200	17954700	19820000	TRUE	13966541.63	11063685.54	13774159.44	15899949.35	10201014.74	16321168.18	9668571.732	14346723.41	16209819.16	18151717.1	23332111.42	10713871.44	16616353.1	13824866.36	18179812.74	19574577.53	14012711.85	13952215.48	15615724.27	16408207.83	12928720.38	13231391.51	14260509.49	14966437.53	14042180.42
RBM8A	Q9Y5S9	RNA-binding protein 8A OS=Homo sapiens GN=RBM8A PE=1 SV=1	1	8	2	3	6.96647	24119400	17444400	26303200	31220000	21210700	28848000	16255900	26914100	26162100	23102800	43827900	20961600	29805100	23273500	26928000	38362900	TRUE	23974702.51	17549684.35	26145401.42	31408425.93	21083452.43	29022109.91	16158377.34	27076538	26005147.91	23242235.19	43564966.96	21088112.14	29626292.77	23413965.44	26766453.11	38594436.36	24053957.44	22131592.29	29640965.11	32412429.06	26721073.14	23527905.25	23832547.34	28246123.04	22527640.51
PABPC4	B1ANR0|Q13310|Q13310-2|Q13310-3	Polyadenylate-binding protein OS=Homo sapiens GN=PABPC4 PE=1 SV=1|Polyadenylate-binding protein 4 OS=Homo sapiens GN=PABPC4 PE=1 SV=1|Isoform 2 of Polyadenylate-binding protein 4 OS=Homo sapiens GN=PABPC4|Isoform 3 of Polyadenylate-binding protein 4 OS=Homo sapiens GN=PABPC4	1	8	2	4	6.6629	31073200	22499100	27778700	26676000	22559300	46809100	21042900	24429200	30408300	28822600	38550600	17467300	32668600	30746500	28242400	29216100	TRUE	30389135.03	23005558.84	27167162.23	27276481.62	22062665.38	47862781.37	20579648.37	24979105.74	29738872.56	29471401.98	37701922.85	17860492.1	31949412.9	31438609.32	27620654.05	29873759.73	30489594.63	29011897.8	30799332.35	28148402.83	27962123.25	38801830.35	30353632.26	26058091.11	25762077.28
CPSF1	Q10570	Cleavage and polyadenylation specificity factor subunit 1 OS=Homo sapiens GN=CPSF1 PE=1 SV=2	1	8	2	7	6.87666	31906900	23796600	36669000	44459000	29131600	40484800	27669800	41495100	34889400	36713600	58727800	27993800	39199700	33737600	37641000	53995900	TRUE	32216463.44	23567941.84	37024765.74	44031799.75	29414237.25	40095787.28	27938254.74	41096379.45	35227899.91	36360824.21	59297582.08	27724811.53	39580018.8	33413420.17	38006196.17	53477061.03	32322963.77	29721108.91	41974868.61	45439322.2	37279472.49	32505213.68	41207094.28	42871558.78	30517090.99
CTPS1	P17812	CTP synthase 1 OS=Homo sapiens GN=CTPS1 PE=1 SV=2	1	8	2	5	6.1966	33508200	19405200	23551900	16131400	20815300	40545800	17407300	20884700	39955000	28774600	36407400	13530000	34161400	39617700	29257600	23673800	TRUE	30590652.77	21255947.94	21501244.32	17669913.14	19002919.13	44412807.59	15891652.49	22876553.49	36476132.16	31518943.35	33237420.44	14820407.7	31186978.88	43396191.15	26710151.02	25931660.6	30691778.53	26805494.85	24375897.79	18234750.36	24084214.55	36004974.56	23439145.66	23864718.03	31598404.87
PRKACB|PRKACA	A0A087WVC4|A0A0A0MS54|P17612|P17612-2|P22694|P22694-10|P22694-2|P22694-3|P22694-4|P22694-5|P22694-6|P22694-7|P22694-9	cAMP-dependent protein kinase catalytic subunit beta OS=Homo sapiens GN=PRKACB PE=1 SV=1|cAMP-dependent protein kinase catalytic subunit beta OS=Homo sapiens GN=PRKACB PE=1 SV=1|cAMP-dependent protein kinase catalytic subunit alpha OS=Homo sapiens GN=PRKACA PE=1 SV=2|Isoform 2 of cAMP-dependent protein kinase catalytic subunit alpha OS=Homo sapiens GN=PRKACA|cAMP-dependent protein kinase catalyti…	1	8	2	2	6.35445	9756570	7785150	10012400	9930920	7043220	14079300	7193910	9618920	12278500	10804900	15607700	6488050	13367700	13436700	11793600	13738600	TRUE	9696624.995	7833278.174	9950883.159	9992313.428	6999945.995	14166338.91	7149710.146	9678384.629	12203060.09	10871696.41	15511805.27	6528159.439	13285567.98	13519766.33	11721139.35	13823532.69	9728679.839	9878406.666	11281287.13	10311728.16	8871700.19	11484495.12	10545353.77	10096447.45	10571220.43
NAA16	Q6N069	N-alpha-acetyltransferase 16, NatA auxiliary subunit OS=Homo sapiens GN=NAA16 PE=1 SV=2	1	8	2	2	7.12303	19433600	15111700	18550700	22313700	16657900	26261300	17042500	20443800	21859000	19193800	31100900	14086500	24722700	24159400	21743500	26033800	TRUE	19198583.44	15296687.6	18326360.62	22586849.79	16456450.84	26582773.74	16836399.75	20694059.7	21594652.32	19428758.01	30724787.15	14258937.77	24423720.71	24455143.65	21480549.1	26352488.84	19262049.6	19290378.48	20776541.43	23308862.03	20856832.06	21550362.26	24832585.94	21587950.29	18706933.18
SMC1A	Q14683	Structural maintenance of chromosomes protein 1A OS=Homo sapiens GN=SMC1A PE=1 SV=2	1	8	2	3	5.95306	9764790	7978690	9293020	11179900	9319510	10418000	8218170	11493000	11680500	13656500	17843500	8763210	12280900	11215500	10787400	16833700	TRUE	9905636.529	7865242.39	9427061.757	11020934.94	9453933.846	10269868.26	8336708.209	11329583.03	11848978.57	13462320.59	18100873.18	8638607.436	12458038.69	11056028.75	10942996.57	16594344.54	9938382.317	9918716.166	10687432.34	11373230.63	11981873.4	8325669.231	12296098.1	11818970.21	10264488.04
ADH5	P11766	Alcohol dehydrogenase class-3 OS=Homo sapiens GN=ADH5 PE=1 SV=4	1	8	2	2	6.03194	12134900	7311780	8049640	5090070	9284300	14801500	7352920	8326420	16281600	11401200	12851400	4625590	11192300	16044100	9455330	8381340	TRUE	11040105.28	8036854.437	7323412.066	5594828.026	8446682.665	16269294.34	6689549.228	9152111.459	14812695.46	12531802.76	11691963.59	5084287.754	10182545.41	17635117.07	8602282.563	9212477.614	11076601.37	10135133.04	8302530.837	5773672.545	10705287.76	13189337.95	9866646.586	9547441.639	12831885.42
PCM1	A6NNN6|E7ETA6|H0YBA1|Q15154|Q15154-2	Pericentriolar material 1 protein OS=Homo sapiens GN=PCM1 PE=1 SV=5|Pericentriolar material 1 protein OS=Homo sapiens GN=PCM1 PE=1 SV=1|Pericentriolar material 1 protein (Fragment) OS=Homo sapiens GN=PCM1 PE=1 SV=1|Pericentriolar material 1 protein OS=Homo sapiens GN=PCM1 PE=1 SV=4|Isoform 2 of Pericentriolar material 1 protein OS=Homo sapiens GN=PCM1	1	8	2	2	5.56621	2214300	2012770	2024910	2309910	1827000	2339000	1446820	2504250	3378610	3112620	4883470	1897740	4648630	3145120	3915750	5042170	TRUE	2168670.214	2055119.576	1983182.949	2358511.534	1789351.254	2388213.6	1417005.572	2556940.534	3308987.433	3178110.909	4782836.982	1937669.294	4552836.299	3211294.724	3835058.66	5148259.5	2175839.346	2591674.452	2248328.708	2433903.817	2267815.761	1936098.495	2089990.329	2667388.9	2866497.033
RUVBL1	Q9Y265	RuvB-like 1 OS=Homo sapiens GN=RUVBL1 PE=1 SV=1	1	8	2	5	6.60027	20841700	14076100	17580700	16393100	14871100	24452400	13598900	16538400	24240800	20859500	31514400	13008500	25710000	25702200	25276600	25637400	TRUE	19836872.27	14789118.43	16733092.81	17223485.01	14154129.04	25691025.18	12943264.82	17376145.12	23072093.61	21916128.47	29995016.12	13667439.64	24470460	27004133.23	24057955.24	26936050.82	19902448.47	18650292.11	18970258.37	17774051.69	17938879.73	20827431.51	19090467.12	18126716.68	19986805.4
NARS	O43776	Asparagine--tRNA ligase, cytoplasmic OS=Homo sapiens GN=NARS PE=1 SV=1	1	8	2	3	6.43567	25221300	15902600	13727000	9510070	17724900	30433000	13675700	16597600	27523200	20396400	22406100	8464480	24923600	30138800	18393900	15154600	TRUE	23150344.68	17325195.41	12599857.32	10360810.25	16269484.3	33155438.22	12552769.63	18082367.87	25263232.53	22220996.29	20566304.59	9221685.136	22877089.23	32834920.04	16883551.8	16510281.74	23226874.47	21848493.32	14284421.39	10692004.37	20619871.51	26878749.05	18514512.33	18863445.09	21884936.88
MYH9	P35579	Myosin-9 OS=Homo sapiens GN=MYH9 PE=1 SV=4	1	8	2	43	7.74272	382969000	205714000	277142000	224515000	250974000	445636000	199184000	237859000	386323000	249142000	403744000	163656000	401409000	454314000	324028000	306402000	TRUE	351888346.5	223883756.5	254649958.9	244345361	230605677.9	484996945.7	183018804.1	258867974.1	354970145.6	271147548.8	370977307.7	178110969.8	368831809.5	494441432.9	297730827.1	333465057.1	353051609.6	282335791.4	288695913.5	252156115.5	292268602.9	393181688.8	269940738.5	270049909.9	307502186
EIF4A2	E7EQG2|Q14240|Q14240-2	Eukaryotic initiation factor 4A-II OS=Homo sapiens GN=EIF4A2 PE=1 SV=1|Eukaryotic initiation factor 4A-II OS=Homo sapiens GN=EIF4A2 PE=1 SV=2|Isoform 2 of Eukaryotic initiation factor 4A-II OS=Homo sapiens GN=EIF4A2	1	8	2	4	7.02939	28304300	17938900	17856500	16957700	18162000	33028100	14103400	18349700	34744100	49419200	32285000	12330700	32648600	34054000	24838200	22538200	TRUE	27758284.76	18291764.48	17512032.16	17291263.93	17811638.79	33677774.36	13831332.81	18710645.06	34073855.26	50391293.08	31662193.5	12573249.21	32018779.33	34723854.18	24359048.92	22981534.34	27850047.35	23067416.25	19853339.63	17843997.24	22574391.19	27302201.21	20400309.2	19518861.04	29517369.59
AHCY	P23526	Adenosylhomocysteinase OS=Homo sapiens GN=AHCY PE=1 SV=4	1	8	2	9	7.26123	88191800	68640900	54182800	38827900	65161300	97235800	44457900	64951200	99201600	73964400	85895000	34781600	109499000	104175000	62586100	61712100	TRUE	82507498.7	73369870.86	50690509.78	41502923.31	60961403.15	103934798.2	41592417.05	69425971.34	92807674.67	79060129.99	80358736.3	37177856.07	102441367.6	111352069.9	58552184.72	65963715.62	82780249.78	92525428.73	57467682.66	42829607.58	77262209.21	84258797.59	61346088.61	72424862.02	80397079.02
CFL1	P23528	Cofilin-1 OS=Homo sapiens GN=CFL1 PE=1 SV=3	1	8	2	7	7.24355	53471100	37579500	39207300	31708300	36679700	63422200	30887000	38715500	53191000	42661800	58765300	23026100	53919200	66506300	42421300	41851700	TRUE	51013907.13	39389596.2	37405580.98	33235597.42	34994133.45	66477064.57	29467629.23	40580314.05	50746678.75	44716695.94	56064819.25	24135200.87	51441415.29	69709716.78	40471885.91	43867575.76	51182547.54	49673513.57	42406597.74	34298007.99	44351407.94	53892224.98	43462821.4	42333201.66	43960639.64
UQCRC2	H3BRG4|P22695	Cytochrome b-c1 complex subunit 2, mitochondrial OS=Homo sapiens GN=UQCRC2 PE=1 SV=1|Cytochrome b-c1 complex subunit 2, mitochondrial OS=Homo sapiens GN=UQCRC2 PE=1 SV=3	1	8	2	4	6.57468	19689200	10999500	19393000	19594000	16511000	18039800	11953800	18857700	23237400	18269400	36875100	14559900	23896300	19633800	27195600	29075700	TRUE	18122214.74	11950600.88	17849588.12	21288247.07	15196955.06	19599659.05	11002444.52	20488280.94	21388027.59	19849112.02	33940357.19	15818860.29	21994488.36	21331488.48	25031210.17	31589807.35	18182122.67	15070688.51	20236025.84	21968748.11	19260552.75	15889227.99	16227884.41	21373282.81	18527939.1
DDX27	B7Z6D5|Q96GQ7	Probable ATP-dependent RNA helicase DDX27 OS=Homo sapiens GN=DDX27 PE=1 SV=1|Probable ATP-dependent RNA helicase DDX27 OS=Homo sapiens GN=DDX27 PE=1 SV=2	1	8	2	2	5.66545	4376370	2911710	4584480	4388600	3395910	4738030	3001010	4733650	5963280	5886150	8817780	3521740	5999060	4764170	5353330	6517090	TRUE	4208200.486	3028068.728	4408313.503	4563978.699	3265416.341	4927372.738	2885691.05	4922817.702	5734130.752	6121374.292	8478941.7	3662476.95	5768535.844	4954557.353	5147619.125	6777528.128	4222111.843	3818643.184	4997692.123	4709871.043	4138574.04	3994566.876	4256205.131	5135461.355	4967340.953
PPP1R9A	Q9ULJ8|Q9ULJ8-3|Q9ULJ8-4|Q9ULJ8-5	Neurabin-1 OS=Homo sapiens GN=PPP1R9A PE=1 SV=2|Isoform 3 of Neurabin-1 OS=Homo sapiens GN=PPP1R9A|Isoform 4 of Neurabin-1 OS=Homo sapiens GN=PPP1R9A|Isoform 5 of Neurabin-1 OS=Homo sapiens GN=PPP1R9A	1	8	2	7	6.93259	29204200	23785700	30662800	41585000	25763000	36017000	20940700	31228700	37727200	46952400	52819000	23850500	32962400	27945800	32719200	41882100	TRUE	29830756.98	23286111.73	31320650.28	40711560.15	26315728.29	35260508.88	21389969	30572781.01	38536612.36	45966224.76	53952197.04	23349550.69	33669586.7	27358834.14	33421169	41002419.94	29929370.7	29365698.02	35508129.61	42012947.67	33352436.12	28585306.68	31548802.08	31893388.07	33383349.81
FTO	Q9C0B1	Alpha-ketoglutarate-dependent dioxygenase FTO OS=Homo sapiens GN=FTO PE=1 SV=3	1	8	2	3	6.32692	17977900	12215200	13874700	10226400	11165400	25301400	11364400	11860400	20379400	14921000	18749000	8617120	15285300	18441700	14375800	11148600	TRUE	16902981.65	12992006.3	13045116.48	10876731.71	10497808.49	26910402.47	10684910.06	12614643.36	19160893.33	15869877.37	17627976.73	9165112.101	14371375.15	19614470.71	13516255.16	11857577.56	16958859.07	16383986.22	14789210.39	11224417.8	13304875.45	21815967.26	15759541.91	13159539.39	16598625.71
SPAG9	A0A087X2D8|O60271|O60271-2|O60271-4	C-Jun-amino-terminal kinase-interacting protein 4 OS=Homo sapiens GN=SPAG9 PE=1 SV=1|C-Jun-amino-terminal kinase-interacting protein 4 OS=Homo sapiens GN=SPAG9 PE=1 SV=4|Isoform 2 of C-Jun-amino-terminal kinase-interacting protein 4 OS=Homo sapiens GN=SPAG9|Isoform 4 of C-Jun-amino-terminal kinase-interacting protein 4 OS=Homo sapiens GN=SPAG9	1	8	2	4	6.56723	29512100	19510900	21540400	18696000	20483400	39601400	19211900	20044100	29914100	23618300	32556200	13247500	23563000	26387700	23183000	21030100	TRUE	27770000.71	20734879.98	20268870.17	19868858.75	19274264.88	42085720.09	18077821.53	21301529.29	28148270.65	25099950.08	30634407.48	14078557.25	22172076.09	28043083.23	21814507.49	22349384.17	27861802.04	26148385.4	22978758.82	20503987.56	24428116.95	34118430.33	26663601.68	22221659.85	24384176.72
NSUN2	Q08J23	tRNA (cytosine(34)-C(5))-methyltransferase OS=Homo sapiens GN=NSUN2 PE=1 SV=2	1	8	2	3	6.32994	11043700	8036290	7471110	7735990	9474790	15107100	7364130	8657580	15124200	11924700	12336400	5603990	12624300	14129300	9584160	11008400	TRUE	10750655.93	8255345.206	7272864.439	7946859.553	9223376.883	15518893.12	7168723.149	8893570.484	14722880.05	12249746.46	12009054.19	5756744.963	12289314.78	14514440	9329844.755	11308469.72	10786195.16	10410667.83	8245225.14	8200889.215	11689666.53	12580995.94	10573396.71	9277732.853	12754080.47
PICALM	Q13492|Q13492-2|Q13492-3|Q13492-4|Q13492-5	Phosphatidylinositol-binding clathrin assembly protein OS=Homo sapiens GN=PICALM PE=1 SV=2|Isoform 2 of Phosphatidylinositol-binding clathrin assembly protein OS=Homo sapiens GN=PICALM|Isoform 3 of Phosphatidylinositol-binding clathrin assembly protein OS=Homo sapiens GN=PICALM|Isoform 4 of Phosphatidylinositol-binding clathrin assembly protein OS=Homo sapiens GN=PICALM|Isoform 5 of Phosphatidyli…	1	8	2	2	6.39784	13018400	10831100	10158900	12232500	10249600	16260000	7308010	11847200	15246600	14750000	20762700	9225720	18645600	18407300	15208700	19899000	TRUE	13313017.08	10591407.75	10388804.25	11961794.76	10481556.86	15900166.18	7473396.267	11585021.45	15591643.08	14423582.48	21232576.95	9021554.807	19067565.24	17999946.43	15552885.37	19458635.11	13357026.9	13356634.42	11777756.99	12344166.02	13284278.21	12890089.82	11022769.58	12085442.43	13506669.2
TST	Q16762	Thiosulfate sulfurtransferase OS=Homo sapiens GN=TST PE=1 SV=4	1	8	2	5	7.19143	32630600	25207000	31625600	34708600	23303400	37296200	22284300	32361200	35005400	32303500	53334600	22880500	34408500	31940900	33890800	39524700	TRUE	32287754.45	25474658.99	31293313.85	35077151.16	23058554.15	37692227.43	22050161.7	32704825.43	34637602.72	32646512.75	52774220.16	23123455.2	34046974.28	32280062.5	33534713.68	39944390.62	32394490.44	32125635.73	35477138.38	36198428.91	29224308.21	30556674.15	32522543.03	34117527.25	30005730.59
VCP	P55072	Transitional endoplasmic reticulum ATPase OS=Homo sapiens GN=VCP PE=1 SV=4	1	8	2	22	7.73713	140337000	108272000	107716000	120677000	115286000	165756000	82567800	119828000	147123000	134678000	198807000	91789000	229210000	158010000	152973000	194500000	TRUE	136844044.9	111035651.4	105034973.9	123757290	112416558.4	169986935.1	80512706.75	122886619.2	143461142.9	138115666.7	193858740.2	94131921.53	223505016.7	162043217.8	149165537.8	199464628	137296420.3	140025069.3	119077842.7	127713321	142476242.4	137806538.4	118750964.5	128194770.2	124276972.6
GOT1	P17174	Aspartate aminotransferase, cytoplasmic OS=Homo sapiens GN=GOT1 PE=1 SV=3	1	8	2	6	6.98284	57350400	39460800	32203700	24091600	40237800	65962300	33774000	36204600	68649800	46447900	49649300	20116400	50094800	66489200	32367800	29155400	TRUE	53153757.77	42576343.79	29847179.25	25993701.19	37293380.24	71170213.52	31302571.82	39063057.42	63626318.91	50115095.45	46016189.35	21704647.7	46429089.68	71738713.79	29999271.16	31457302.78	53329472.04	53692263.82	33837659.81	26824616.99	47265463.02	57696909.21	46169241.43	40750406.35	55117965.27
HSP90AB1	P08238	Heat shock protein HSP 90-beta OS=Homo sapiens GN=HSP90AB1 PE=1 SV=4	1	8	2	17	8.7737	253650000	169635000	153690000	104731000	170799000	285497000	133710000	157621000	253875000	170472000	236054000	95774600	242791000	256596000	193518000	146971000	TRUE	229114269.1	187801126.2	138823465.4	115946589.7	154277500.7	316070729	120776144	174500553	229317504.7	188727760.1	213220341.7	106031053.4	219305667.3	284074735.6	174798876.9	162710049.9	229871668.9	236832633.2	157383756.7	119652943.5	195530613.1	256235063.2	178136895	182038194.5	198652294.7
NXF1	E9PIN3|Q9UBU9	Nuclear RNA export factor 1 (Fragment) OS=Homo sapiens GN=NXF1 PE=1 SV=1|Nuclear RNA export factor 1 OS=Homo sapiens GN=NXF1 PE=1 SV=1	1	8	2	3	5.8588	11071800	18567700	11964600	14564900	10175500	12992700	10961600	14662300	14367800	16769400	22757400	15762200	15169300	12344700	15218100	17939700	TRUE	11781999.34	17448469.91	12732067.89	13686952.04	10828206.27	12209521.64	11664730.57	13778480.93	15289420.88	15758568.44	24217170.8	14812080.79	16142333	11600582	16194263.27	16858324.7	11820947.95	22003952.58	14434308.12	14124469.75	13723620.11	9898124.887	17204712.92	14373649.53	13244861.3
DLD	P09622	Dihydrolipoyl dehydrogenase, mitochondrial OS=Homo sapiens GN=DLD PE=1 SV=2	1	8	2	3	6.43368	9593220	10131700	9612590	11053500	7449890	10834700	6912740	9528820	12183900	10552000	15893000	7212900	12006600	9603520	10541200	11481400	TRUE	9484773.454	10247543.34	9503924.486	11179882.98	7365672.726	10958581.27	6834594.937	9637770.163	12046167.11	10672648.95	15713337.6	7295370.509	11870871.4	9713324.265	10422037.01	11612675.48	9516127.964	12922993.19	10774571.39	11537259.61	9335220.609	8884001.29	10080579.5	10054078.62	10435307.78
RPL27A	E9PJD9|E9PLL6|P46776	60S ribosomal protein L27a OS=Homo sapiens GN=RPL27A PE=1 SV=1|60S ribosomal protein L27a OS=Homo sapiens GN=RPL27A PE=1 SV=1|60S ribosomal protein L27a OS=Homo sapiens GN=RPL27A PE=1 SV=2	1	8	2	2	6.69731	13080100	9535630	12367300	8300230	10769700	14348000	9716550	11086100	15576800	12741700	17244500	6863300	16092500	14529400	11979800	12270200	TRUE	11912150.58	10470568.95	11262997.98	9114041.809	9808051.017	15754776.9	8848938.978	12173057.72	14185915.03	13990984.17	15704702.62	7536225.279	14655567.1	15953962.61	10910098.66	13473255.05	11951529.45	13204246.78	12768827.86	9405381.669	12430679.91	12772224.33	13051604.91	12698879.23	12288920.45
RPL5	P46777	60S ribosomal protein L5 OS=Homo sapiens GN=RPL5 PE=1 SV=3	1	8	2	4	7.50718	25429000	17480100	17593200	16771700	15963000	33343200	14496300	15976500	24519900	20290200	26476900	12280400	24900900	28154100	20376700	20208800	TRUE	24751694.28	17958425.71	17124602.14	17230641.04	15537822.79	34255603.81	14110188.59	16413681.18	23866808.31	20845421.33	25771683.28	12616441.04	24237660.31	28924509.2	19833963.14	20761793.9	24833517.77	22647048.69	19414111.35	17781436.47	19692566.99	27770641.19	20811603.2	17122678.61	20675247.82
PGD	P52209|P52209-2	6-phosphogluconate dehydrogenase, decarboxylating OS=Homo sapiens GN=PGD PE=1 SV=3|Isoform 2 of 6-phosphogluconate dehydrogenase, decarboxylating OS=Homo sapiens GN=PGD	1	8	2	10	7.27169	98157500	61004900	64396500	42541600	66294900	117732000	53739600	63720500	100160000	66124100	87429900	34162600	74443000	95350000	64458100	53839600	TRUE	89748630.72	66720666.64	58879838	46527474.22	60615607.56	128762730.9	49135883.81	69690700.89	91579582.33	72319502.75	79940033.2	37363415.83	68065683.38	104283681.5	58936160.9	58884024.13	90045319.34	84140236.5	66751900.1	48014773.5	76823949.42	104386529.6	72472207.58	72701026.7	79333211.87
SHMT1	P34896|P34896-2|P34896-3	Serine hydroxymethyltransferase, cytosolic OS=Homo sapiens GN=SHMT1 PE=1 SV=1|Isoform 2 of Serine hydroxymethyltransferase, cytosolic OS=Homo sapiens GN=SHMT1|Isoform 3 of Serine hydroxymethyltransferase, cytosolic OS=Homo sapiens GN=SHMT1	1	8	2	3	6.34739	19917400	15344600	14384300	10942300	15680500	25110400	13848500	16307700	22898200	21821100	19915300	9236720	21964000	21857500	14514500	14983800	TRUE	19077282.02	16020339.57	13777568.75	11424172.78	15019094.9	26216202.09	13264368.85	17025852.19	21932351.57	22782049.17	19075270.6	9643483.107	21037556.23	22820052.14	13902276.9	15643650.8	19140347.19	20202963.01	15619589.39	11789358.39	19035133.58	21253186.65	19564074.52	17761292.67	18999474.01
STRN3	Q13033|Q13033-2	Striatin-3 OS=Homo sapiens GN=STRN3 PE=1 SV=3|Isoform Alpha of Striatin-3 OS=Homo sapiens GN=STRN3	1	8	2	2	6.39945	11219100	7925040	8771410	7624160	7071370	14165900	6859990	8125250	14079700	12181800	12932900	5831920	11444100	12728700	9915780	10395100	TRUE	10934347.73	8131423.882	8548782.614	7822708.365	6891891.373	14534808.35	6685876.415	8336847.751	13722342.77	12499038.42	12604649.73	5983794.853	11153637	13060180.79	9664107.329	10665809.18	10970494.2	10254392.87	9691729.842	8072769.405	8734752.246	11783209.24	9861229.426	8696962.193	11887338.84
PHLDB2	E9PGF6|Q86SQ0	Pleckstrin homology-like domain family B member 2 OS=Homo sapiens GN=PHLDB2 PE=1 SV=1|Pleckstrin homology-like domain family B member 2 OS=Homo sapiens GN=PHLDB2 PE=1 SV=2	1	8	2	7	6.67978	26173900	22851100	28209700	38906700	23111200	31398700	17829200	30546100	22590800	30755800	46575400	21170700	33149500	27548000	31499800	40357600	TRUE	27196770.47	21991670.19	29312129.1	37443419.12	24014380.8	30217794.98	18525961.36	29397261.26	23473643.68	29599074.44	48395556.76	20374470.03	34444975.43	26511919.79	32730805.51	38839750.77	27286676.82	27733301	33231075.01	38640337.1	30435718.62	24497233.98	27324578.55	30667091.14	20334658.66
XPO1	O14980	Exportin-1 OS=Homo sapiens GN=XPO1 PE=1 SV=1	1	8	2	10	7.39227	73273800	58359700	55769200	61067400	62744400	64821200	47654200	59771000	79981500	76910900	89595900	40109200	101251000	89178700	68481800	83193900	TRUE	70343894.76	60790449.55	53539228.7	63610928.41	60235520.34	67521078.56	45748712.77	62260531.84	76783382.59	80114328.66	86013343.94	41779794.95	97202406.44	92893096.84	65743506.31	86659022.94	70576435.73	76661746.05	60697266.96	65644318.15	76342228.59	54738595.64	67476352.33	64949907.66	66515616.29
PRC1	O43663|O43663-2|O43663-3|O43663-4	Protein regulator of cytokinesis 1 OS=Homo sapiens GN=PRC1 PE=1 SV=2|Isoform 2 of Protein regulator of cytokinesis 1 OS=Homo sapiens GN=PRC1|Isoform 3 of Protein regulator of cytokinesis 1 OS=Homo sapiens GN=PRC1|Isoform 4 of Protein regulator of cytokinesis 1 OS=Homo sapiens GN=PRC1	1	8	2	2	6.68848	7741500	6009430	8275240	6479240	5313550	9081210	7934180	8531500	10821400	7221970	16160500	5374420	7294580	8936800	8585950	7939790	TRUE	7150813.541	6505833.508	7643828.489	7014451.737	4908119.265	9831355.106	7328791.808	9236236.811	9995713.189	7818534.274	14927432.96	5818369.084	6737994.115	9675016.249	7930830.914	8595649.143	7174452.509	8204389.997	8665785.998	7238676.009	6220528.365	7970171.437	10809487.49	9635200.828	8659048.359
YWHAB	P31946|P31946-2	14-3-3protein beta/alpha OS=Homo sapiens GN=YWHAB PE=1 SV=3|Isoform Short of 14-3-3 protein beta/alpha OS=Homo sapiens GN=YWHAB	1	8	2	3	7.33848	41844500	25361400	27386000	19316100	24328000	56536500	19806700	21459500	44036100	33873700	38557900	12765300	36625500	43567300	28140200	23491200	TRUE	38576117.99	27510158.04	25246939.68	20952666.79	22427793.34	61326584.88	18259642.16	23277667.49	40596536.93	36743667.16	35546227.1	13846846.8	33764762.62	47258562.55	25942230.77	25481504.35	38703641.89	34692567.08	28622381.66	21622440.66	28424884.79	49716787.75	26931775.19	24283158.36	35167813.43
PPP4C	H3BTA2|P60510	Serine/threonine-protein phosphatase (Fragment) OS=Homo sapiens GN=PPP4C PE=1 SV=1|Serine/threonine-protein phosphatase 4 catalytic subunit OS=Homo sapiens GN=PPP4C PE=1 SV=1	1	8	2	3	6.26067	12145800	9040270	7945180	7173700	9408920	10169500	5719060	8499460	12943300	11498400	12803900	5626860	14419900	15070300	12511700	11941900	TRUE	11505474	9543397.458	7526310.49	7572945.315	8912882.187	10735473.66	5417551.43	8972489.202	12260929.84	12138332.3	12128879	5940017.435	13659683.56	15909022.93	11852083.77	12606514.86	11543508.49	12035007.43	8532556.187	7815022.418	11296146.95	8703130.402	7990533.218	9360060.505	10621351.62
ATXN2L	H3BUF6|Q8WWM7|Q8WWM7-2|Q8WWM7-3|Q8WWM7-4|Q8WWM7-5|Q8WWM7-6|Q8WWM7-8|Q8WWM7-9	Ataxin-2-like protein OS=Homo sapiens GN=ATXN2L PE=1 SV=1|Ataxin-2-like protein OS=Homo sapiens GN=ATXN2L PE=1 SV=2|Isoform 2 of Ataxin-2-like protein OS=Homo sapiens GN=ATXN2L|Isoform 3 of Ataxin-2-like protein OS=Homo sapiens GN=ATXN2L|Isoform 4 of Ataxin-2-like protein OS=Homo sapiens GN=ATXN2L|Isoform 5 of Ataxin-2-like protein OS=Homo sapiens GN=ATXN2L|Isoform 6 of Ataxin-2-like protein OS=H…	1	8	2	2	6.49931	9085060	7416040	6277090	8907380	7520490	9121350	5543720	7505550	9064200	7806660	12308300	5462440	12233000	9330980	8019310	10824200	TRUE	8922073.036	7551515	6164478.323	9070098.554	7385571.592	9287977.323	5444265.061	7642660.154	8901587.267	7949270.782	12087487.76	5562226.956	12013538.65	9501436.809	7875442.707	11021934.71	8951567.387	9523080.179	6988651.043	9360033.723	9360440.343	7529661.046	8029934.072	7972788.805	7711233.122
SDAD1	Q9NVU7|Q9NVU7-2	Protein SDA1 homolog OS=Homo sapiens GN=SDAD1 PE=1 SV=3|Isoform 2 of Protein SDA1 homolog OS=Homo sapiens GN=SDAD1	1	8	2	2	5.98574	6285650	5536700	7701910	7813970	6541250	7894800	5246470	7586910	7691000	7499650	12590300	7059620	7713940	6773990	9454520	9296760	TRUE	6166588.233	5643600.163	7556021.665	7964838.688	6417346.699	8047229.318	5147092.213	7733394.714	7545318.32	7644449.936	12351816.57	7195924.031	7567823.794	6904779.213	9275434.009	9476257.744	6186973.575	7117042.984	8566239.658	8219443.072	8133316.452	6523800.287	7591623.602	8067442.691	6536329.623
SERPINB12	Q96P63|Q96P63-2	Serpin B12 OS=Homo sapiens GN=SERPINB12 PE=1 SV=1|Isoform 2 of Serpin B12 OS=Homo sapiens GN=SERPINB12	1	8	2	2	6.50462	5828220	3835520	4873840	6916450	5938400	5825720	3701350	5741290	17796100	68836400	7596010	3183300	4744310	10301200	4471820	7262770	TRUE	6643473.068	3364844.585	5555594.122	6067698.598	6769065.077	5110817.41	4219095.889	5036748.228	20285423.52	60389148.74	8658542.035	2792661.69	5407945.429	9037089.374	5097339.451	6371519.977	6665434.883	4243345.179	6298360.805	6261658.918	8579082.749	4143283.454	6222889.857	5254313.168	17572779.44
PSMD11	O00231|O00231-2	26S proteasome non-ATPase regulatory subunit 11 OS=Homo sapiens GN=PSMD11 PE=1 SV=3|Isoform 2 of 26S proteasome non-ATPase regulatory subunit 11 OS=Homo sapiens GN=PSMD11	1	8	2	3	6.24791	16555200	12323600	12591700	11472700	13034400	21053800	12231000	14369600	18268300	17324900	21461500	10081800	18996800	18394900	16145000	17265700	TRUE	16024544.81	12731697.85	12188089.59	11852620.17	12616599.43	21750999.73	11838951.36	14845451.45	17682733.64	17898616.65	20773579.81	10415660.31	18387882.53	19004049.86	15627493.23	17837456.23	16077518.32	16055715.9	13817601.52	12231501.55	15990221.58	17633296.21	17461677.17	15486708.39	15318131.16
GNS	F6S8M0|H7C3P4|P15586|P15586-2	N-acetylglucosamine-6-sulfatase OS=Homo sapiens GN=GNS PE=1 SV=1|N-acetylglucosamine-6-sulfatase OS=Homo sapiens GN=GNS PE=1 SV=1|N-acetylglucosamine-6-sulfatase OS=Homo sapiens GN=GNS PE=1 SV=3|Isoform 2 of N-acetylglucosamine-6-sulfatase OS=Homo sapiens GN=GNS	1	8	2	2	6.31598	5468120	4768760	5932750	6786400	4788730	7583510	4040060	5974960	7951060	9710120	9733880	4508830	7103680	6505690	6827440	8408300	TRUE	5606278.14	4651241.212	6082647.534	6619159.564	4909722.595	7396626.008	4142136.614	5827716.26	8151952.384	9470828.961	9979817.316	4397716.789	7283162.384	6345367.232	6999942.873	8201090.322	5624811.224	5865596.903	6895879.717	6830747.909	6222560.418	5996363.34	6109379.973	6079447.473	7061842.27
RPS19	P39019	40S ribosomal protein S19 OS=Homo sapiens GN=RPS19 PE=1 SV=2	1	8	2	5	6.63161	15347700	10592600	12892500	9944690	12773500	19580300	8624240	11917300	18845500	20424900	18679200	8390900	20684000	20942700	15680700	19480800	TRUE	14996664.27	10840547.21	12597620.11	10177471.2	12481341.9	20038627.59	8426984.62	12196255.24	18414461.87	20902997.63	18251965.52	8587310.726	20210911.32	21432918.08	15322047.82	19936798.53	15046239.84	13670819.73	14281885.06	10502804.69	15818796.8	16245094.95	12429249.89	12723078.78	15952009.91
NUP54	Q7Z3B4|Q7Z3B4-3	Nucleoporin p54 OS=Homo sapiens GN=NUP54 PE=1 SV=2|Isoform 3 of Nucleoporin p54 OS=Homo sapiens GN=NUP54	1	8	2	3	6.38955	11642300	9334860	11171600	12988800	8929230	12007200	8547190	12103600	11326400	13965400	18452900	8874660	12224300	13081200	12859700	16870000	TRUE	11929951.08	9109780.911	11447621.3	12675618.31	9149848.144	11717686.32	8758368.925	11811761.96	11606246.01	13628670.85	18908823.36	8660677.102	12526330.79	12765790.39	13177429.88	16463236.08	11969388.79	11488181.38	12978134.78	13080807.68	11596476.54	9499399.405	12918020.02	12321977.11	10054214.6
UBA1	P22314|P22314-2	Ubiquitin-like modifier-activating enzyme 1 OS=Homo sapiens GN=UBA1 PE=1 SV=3|Isoform 2 of Ubiquitin-like modifier-activating enzyme 1 OS=Homo sapiens GN=UBA1	1	8	2	16	7.63981	140527000	101742000	91009500	73101400	102731000	171175000	77339300	99151100	161705000	115237000	135122000	53055100	147891000	159129000	102658000	92023500	TRUE	131249359.5	108933849.9	85001021.77	78268728.12	95948664.34	183274869.4	72233333.04	106159806.6	151029180.8	123382772.7	126201199.5	56805412.72	138127185.7	170377372.2	95880483.83	98528377.06	131683240.2	137374525.1	96365409.74	80770669.73	121604907.3	148578920.5	106539431.1	110745434.3	130832983.6
TUFM	P49411	Elongation factor Tu, mitochondrial OS=Homo sapiens GN=TUFM PE=1 SV=2	1	8	2	11	7.43194	67792700	48520300	81065800	78026700	60720800	85212000	61716600	79674000	79085300	71731400	133972000	55571000	76109400	71647300	84203000	99529200	TRUE	65097070.36	50529495.78	77842394.34	81257737.65	58306369.12	88740576.5	59262573.3	82973251.33	75940644.62	74701753.15	128644894.1	57872160.93	73083074.83	74614170.62	80854850.38	103650642.9	65312266.52	63721841.2	88249694.75	83855226.06	73897230.97	71941009.2	87408410.72	86557323.76	65785572.46
ME2	P23368	NAD-dependent malic enzyme, mitochondrial OS=Homo sapiens GN=ME2 PE=1 SV=1	1	8	2	5	7.04486	19694700	15846600	23041200	27439400	17375200	22175600	17105800	26783800	22582200	21862900	36048800	16816500	22911700	20370800	25098000	32537000	TRUE	19690749.66	15849779.13	23036578.42	27444904.87	17371714.9	22180048.85	17102368.94	26789173.35	22577670.48	21867286.12	36041569.37	16819873.71	22907104.39	20374886.77	25092965.87	32543527.55	19755842.81	19987872.3	26116501.57	28322209.91	22016833.63	17981121.62	25224873.05	27946345.52	19558498.42
TBCD	J3KR97|Q9BTW9|Q9BTW9-4|Q9BTW9-5	Tubulin-specific chaperone D OS=Homo sapiens GN=TBCD PE=1 SV=1|Tubulin-specific chaperone D OS=Homo sapiens GN=TBCD PE=1 SV=2|Isoform 4 of Tubulin-specific chaperone D OS=Homo sapiens GN=TBCD|Isoform 5 of Tubulin-specific chaperone D OS=Homo sapiens GN=TBCD	1	8	2	2	6.50045	11880600	7805050	7798390	8637020	11616100	15598700	17534000	10529100	11237600	10882700	10625300	5018190	9804670	10789000	7639500	7176680	TRUE	10965609.53	8456317.616	7197793.015	9357708.711	10721480.13	16900284	16183610.04	11407667.32	10372130.5	11790772.35	9806987.099	5436916.932	9049558.337	11689253.85	7051140.009	7775515.276	11001859.35	10664110.54	8160116.886	9656837.639	13588355.88	13700874.33	23869763.92	11900427.4	8985129.716
ACTN4	O43707	Alpha-actinin-4 OS=Homo sapiens GN=ACTN4 PE=1 SV=2	1	8	2	28	8.03003	181638000	141426000	165640000	205878000	136575000	198449000	120711000	162922000	191877000	178093000	306220000	136313000	243335000	215809000	243040000	277824000	TRUE	179052078.4	143468514.9	163281836.8	208851349.2	134630625.8	201315057.5	118992476.5	165274966.3	189145309.1	180665070.3	301860444.7	138281671.5	239870718.2	218925775.6	239579918	281836414	179643984	180925572	185112140.7	215527500.6	170630251.9	163203902.6	175506102.4	172414103.8	163852078.1
RANGAP1	P46060	Ran GTPase-activating protein 1 OS=Homo sapiens GN=RANGAP1 PE=1 SV=1	1	8	2	6	7.02796	26276500	21961000	22196500	28029900	20019700	31279800	14708000	23586800	32698700	51586500	41387000	22749900	31821800	27037700	29234900	32959900	TRUE	27601306.05	20906917.07	23315601	26684522.32	21029051.31	29778433.79	15449546.53	22454682	34347299.91	49110453.87	43473645.78	21657951.49	33426188.45	25739945.89	30708862.37	31377892.44	27692549.71	26365338.28	26432828.65	27537520.94	26652125.4	24141048.7	22787068.35	23424623.59	29754248.18
ACAA2	A0A0B4J2A4|P42765	3-ketoacyl-CoA thiolase, mitochondrial OS=Homo sapiens GN=ACAA2 PE=1 SV=1|3-ketoacyl-CoA thiolase, mitochondrial OS=Homo sapiens GN=ACAA2 PE=1 SV=2	1	8	2	2	6.78756	8123080	5849560	13219100	11173800	7321960	12811200	7449270	10938400	8909030	7146140	17135300	5586460	8962230	7577110	11601100	14795500	TRUE	7717848.258	6156695.786	12559645.84	11760489.23	6956693.302	13483862.21	7077652.256	11512729.37	8464589.991	7521353.747	16280480.46	5879781.512	8515136.031	7974952.169	11022362.14	15572349.46	7743361.714	7764098.675	14238833.75	12136425.54	8816881.92	10931218.77	10439073.11	12010027.65	7332672.786
CYB5R3	P00387|P00387-2|P00387-3	NADH-cytochrome b5 reductase 3 OS=Homo sapiens GN=CYB5R3 PE=1 SV=3|Isoform 2 of NADH-cytochrome b5 reductase 3 OS=Homo sapiens GN=CYB5R3|Isoform 3 of NADH-cytochrome b5 reductase 3 OS=Homo sapiens GN=CYB5R3	1	8	2	2	6.11241	6587690	4000250	8983080	7462920	4122500	8829070	4896270	7877550	6532470	7770730	12055900	4370530	5547580	6047410	8995630	9107250	TRUE	6510086.784	4047934.812	8877259.007	7551881.424	4073936.808	8934316.557	4838591.77	7971454.003	6455517.278	7863360.66	11913881.08	4422628.719	5482229.316	6119497.896	8889661.168	9215812.59	6531607.655	5104778.018	10064122.57	7793285.197	5163289.256	7242952.153	7136605.673	8315785.075	5592260.926
ETFA	P13804	Electron transfer flavoprotein subunit alpha, mitochondrial OS=Homo sapiens GN=ETFA PE=1 SV=1	1	8	2	2	7.42004	18332100	13351700	14430700	12622500	17742200	25628500	14651100	16342200	20914200	14473400	24798300	10820300	18772500	19210700	15398200	16252900	TRUE	17120252.13	14296792.92	13476755.12	13515976.89	16569347.62	27442599.63	13682585.52	17498973.86	19531661.8	15497891.86	23159002.43	11586209.13	17531539.39	20570519.1	14380298.3	17403352.81	17176847.81	18029429.24	15278557.85	13948029.2	20999916.93	22247413.64	20180916.7	18254851.07	16919813.61
ACBD3	Q9H3P7	Golgi resident protein GCP60 OS=Homo sapiens GN=ACBD3 PE=1 SV=4	1	8	2	3	6.22467	16937500	12453100	14974600	15084200	12203700	21162600	10638900	13335500	21634500	15675900	23931900	11790000	23645200	22746100	22473600	22339700	TRUE	16315403.54	12927929.17	14424598.78	15659351.42	11755471	21969517.13	10248144.45	13843974.55	20839887.69	16273612.58	23052906.62	12239545.57	22776736.81	23613395.03	21648168.44	23191499.24	16369338.56	16303179.69	16353125.44	16159918.93	14898831.28	17810445.87	15115341.26	14441972.17	18053098.56
CARM1	Q86X55|Q86X55-1	Histone-arginine methyltransferase CARM1 OS=Homo sapiens GN=CARM1 PE=1 SV=3|Isoform 1 of Histone-arginine methyltransferase CARM1 OS=Homo sapiens GN=CARM1	1	8	2	3	6.29725	11694000	8283660	7896220	8198000	8875810	14015100	7873990	7754490	11904400	10096900	12007100	5472820	11748200	13319700	9448340	9039270	TRUE	11169047.82	8672997.162	7541752.931	8583311.089	8477368.422	14673818.4	7520520.852	8118955.843	11370002.81	10571460.57	11468092.53	5730045.937	11220814.74	13945734.17	9024197.133	9464121.301	11205970.16	10937361.23	8550063.237	8857685.588	10744178.75	11895903.16	11092275.26	8469658.333	9849562.74
DDX42	A0A0A0MSJ0|Q86XP3|Q86XP3-2	ATP-dependent RNA helicase DDX42 OS=Homo sapiens GN=DDX42 PE=1 SV=1|ATP-dependent RNA helicase DDX42 OS=Homo sapiens GN=DDX42 PE=1 SV=1|Isoform 2 of ATP-dependent RNA helicase DDX42 OS=Homo sapiens GN=DDX42	1	8	2	3	6.37329	19333200	14224200	16046100	20378500	15000200	21319600	12031400	17087300	23970600	18642400	29931400	13967700	26863400	22566700	21951300	23841100	TRUE	18772678.59	14648911.3	15580880.45	20986968.61	14565303.9	21956168.31	11682577.39	17597498.77	23275627.9	19199031.51	29063608.29	14384752.63	26084557.86	23240504.67	21314872.83	24552956.17	18834736.81	18473479.4	17663998.59	21657838.97	18460000.9	17799624.13	17231035.81	18357631.82	20163122.31
AIM1	A0A0J9YWL0|Q9Y4K1	Absent in melanoma 1 protein OS=Homo sapiens GN=AIM1 PE=1 SV=1|Absent in melanoma 1 protein OS=Homo sapiens GN=AIM1 PE=1 SV=3	1	8	2	4	6.74442	28774800	34516100	25847900	47329700	27194000	29105500	17485500	33717700	33064800	55204500	44729200	32144600	47167100	32879100	34369600	58237500	TRUE	32322277.33	30727843.34	29034536.9	42135108.16	30546589.72	25911074.67	19641185.35	30017070.39	37141166.42	49145622.7	50243602.29	28616623.34	52982056.77	29270509.53	38606827.61	51845740.87	32429127.45	38750332.33	32916369.55	43482000.88	38714610.94	21005823.2	28969460.84	31313673.25	32174508.22
AKR1B10	O60218	Aldo-keto reductase family 1 member B10 OS=Homo sapiens GN=AKR1B10 PE=1 SV=2	1	8	2	8	7.26511	69744200	30736200	41043100	21336000	30342100	88245200	34428600	32907600	76964600	41528000	65579600	18335100	42651600	80827400	43124400	29795200	TRUE	61268339.99	34988244.83	36055221.87	24287621.49	26654690.98	100453037.9	30244567.58	37460036.23	67611260.58	47272982.07	57609854.72	20871577.09	37468244.38	92009059.69	37883586.03	33917066.92	61470879.23	44123048.27	40875699.56	25064000.67	33782035.92	81436172.8	44608754.53	39078141.84	58570025.36
IPO7	O95373	Importin-7 OS=Homo sapiens GN=IPO7 PE=1 SV=1	1	8	2	17	7.62777	145939000	113349000	83540100	75739700	105937000	139410000	76784300	95912900	181561000	133134000	156743000	61452500	179217000	171286000	121572000	112628000	TRUE	135208052.4	122345077.9	77397366.16	81750871.2	98147413.99	150474440.1	71138322.59	103525141.2	168210753.9	143700337.9	145217630.4	66329750.61	166039109	184880316.7	112632766.8	121566854.9	135655019.6	154287184.3	87745167.62	84364123.14	124391592.7	121987973.4	104924362.4	107996963.1	145716971.3
RPS25	P62851	40S ribosomal protein S25 OS=Homo sapiens GN=RPS25 PE=1 SV=1	1	8	2	2	6.20045	5247150	3923330	5465260	4129730	4673810	7990770	4833360	5760770	6322690	6822430	7496410	4453050	8105540	7799910	6571600	7205330	TRUE	5165723.621	3985172.75	5380448.944	4194826.197	4601280.832	8116727.081	4758354.901	5851575.989	6224573.164	6929970.746	7380079.13	4523242.632	7979756.522	7922858.589	6469620.527	7318906.33	5182800.332	5025629.907	6099799.229	4328918.195	5831642.709	6580141.359	7018261.551	6104337.835	5392199.539
FTCD	O95954	Formimidoyltransferase-cyclodeaminase OS=Homo sapiens GN=FTCD PE=1 SV=2	1	8	2	4	5.94989	11404800	7238700	9275100	8916950	7577320	12850100	7842990	9521840	13790500	13431900	16019400	6793450	9529090	12271300	12205800	10566400	TRUE	11021268.03	7490601.402	8963187.703	9227253.26	7322502.339	13297273.97	7579238.123	9853192.984	13326739.34	13899320.18	15480683.67	7029857.031	9208636.274	12698332.16	11795331.21	10934102.9	11057701.84	9446263.132	10161539.68	9522212.043	9280506.654	10779953.73	11178879.38	10278806.74	11544637.01
CNOT1	A5YKK6|A5YKK6-2	CCR4-NOT transcription complex subunit 1 OS=Homo sapiens GN=CNOT1 PE=1 SV=2|Isoform 2 of CCR4-NOT transcription complex subunit 1 OS=Homo sapiens GN=CNOT1	1	8	2	3	6.32049	12814200	9187530	9334170	11408600	9757970	10854100	7212430	11773200	14297500	12571100	17140000	8150830	16166200	13801100	12936600	13475600	TRUE	12400653.3	9493922.948	9032932.684	11789062.93	9443055.585	11216071.03	6979666.61	12165821.9	13836083.45	12990330.89	16586848.77	8422650.264	15644475.77	14261349.89	12519103.14	13924994.87	12441647.05	11972616.02	10240609.36	12165912.63	11968086.34	9092745.404	10294550.71	12691330.85	11985869.69
CARS	P49589|P49589-3	Cysteine--tRNA ligase, cytoplasmic OS=Homo sapiens GN=CARS PE=1 SV=3|Isoform 3 of Cysteine--tRNA ligase, cytoplasmic OS=Homo sapiens GN=CARS	1	8	2	4	6.46367	30416300	17103400	21116100	15808900	17457600	38663400	18091300	18999300	33946300	24013000	34931700	12696000	30707700	37475300	24441300	22271200	TRUE	28089757.27	18519994.33	19500929.55	17118276.97	16122268.21	41865707.91	16707496.5	20572922.83	31349747.58	26001884.06	32259774.34	13747550.08	28358868.09	40579203.17	22571785.01	24115818.94	28182615.64	23355232.81	22108146.79	17665480.56	20433290.49	33940068.87	24642462.1	21461580.85	27157539.96
HNRNPA1	F8W6I7|P09651|P09651-2|P09651-3	Heterogeneous nuclear ribonucleoprotein A1 OS=Homo sapiens GN=HNRNPA1 PE=1 SV=2|Heterogeneous nuclear ribonucleoprotein A1 OS=Homo sapiens GN=HNRNPA1 PE=1 SV=5|Isoform A1-A of Heterogeneous nuclear ribonucleoprotein A1 OS=Homo sapiens GN=HNRNPA1|Isoform 2 of Heterogeneous nuclear ribonucleoprotein A1 OS=Homo sapiens GN=HNRNPA1	1	8	2	5	7.56628	53471400	54056400	65521900	81448600	46961800	63720200	41313200	69647500	58812500	64617300	104671000	52402700	72444400	58256000	74331400	108803000	TRUE	55588246.02	51997887.93	68115805.78	78346970.48	48820941.51	61293682.5	42948722.6	66995266.05	61140791.51	62156620.19	108814755.2	50407162.18	75312356.33	56037563.72	77274059.6	104659692.5	55772008.16	65573604.22	77222689.76	80851413.18	61875442.52	49690114.15	63346550.38	69889161.16	52964812.06
ALDH4A1	P30038|P30038-3	Delta-1-pyrroline-5-carboxylate dehydrogenase, mitochondrial OS=Homo sapiens GN=ALDH4A1 PE=1 SV=3|Isoform 3 of Delta-1-pyrroline-5-carboxylate dehydrogenase, mitochondrial OS=Homo sapiens GN=ALDH4A1	1	8	2	4	6.82346	24680700	18791300	27967700	34065900	24046200	28181200	20713900	30903800	28261000	25192400	45296100	21491000	30994500	26885300	27120300	38709000	TRUE	24429631.37	18984422.27	27683193.8	34416002.66	23801585.93	28470824.32	20503184.32	31221405.07	27973510.16	25451307.77	44835317.7	21711867.68	30679203.16	27161606.07	26844414.12	39106820.8	24510390.19	23940914.57	31384355.84	35516146.11	30166023.36	23080984.09	30240852.81	32570029.78	24232785.86
RAB7A	P51149	Ras-related protein Rab-7a OS=Homo sapiens GN=RAB7A PE=1 SV=1	1	8	2	5	6.59569	36277900	29778600	31328000	34922600	24974100	40063500	24318200	34875100	39727300	38724800	53405000	27124700	43255800	39216400	39059700	43205400	TRUE	36378250.79	29696454.6	31414658.53	34826264.68	25043182.57	39952983.31	24385468.24	34778895.71	39837192.41	38617976.17	53552727.23	27049875.48	43375452.84	39108220.07	39167745.72	43086216.26	36498509.04	37449666.48	35614706.48	35939522.59	31739617.38	32389444.08	35966967.09	36281188.07	34510011.35
TXNL1	K7ER96|O43396	Thioredoxin-like protein 1 (Fragment) OS=Homo sapiens GN=TXNL1 PE=1 SV=1|Thioredoxin-like protein 1 OS=Homo sapiens GN=TXNL1 PE=1 SV=3	1	8	2	2	6.39552	17569500	11122600	9887530	9060660	13689900	24020400	9085820	10350000	18766300	16364700	19860500	7850690	16388200	21580700	12504600	12581800	TRUE	16885152.61	11573393.81	9502402.061	9427884.339	13156666.42	24993935.65	8731919.366	10769480.69	18035336.21	17027953.69	19086916.16	8168874.817	15749865.28	22455355.74	12017534.9	13091734.51	16940971.1	14594999.44	10772845.42	9729256.504	16674700.08	20262308.69	12879008.65	11234673.97	15623582.37
PARP1	P09874	Poly [ADP-ribose] polymerase 1 OS=Homo sapiens GN=PARP1 PE=1 SV=4	1	8	2	3	6.20365	10809500	8211800	9902140	12924800	8710100	13716800	7026050	11770600	13547800	15203800	17118700	9442280	16201700	14326300	13700200	16922900	TRUE	11201703.31	7924281.659	10261421.38	12472266.2	9026130.35	13236536.04	7280977.617	11358478.01	14039357.61	14671471.97	17739821.31	9111679.074	16789549.61	13824695.72	14197287.17	16330381.41	11238733.6	9993169.529	11633343.4	12870955.21	11439677.16	10730714.16	10738964.69	11849113.33	12161961.25
GFM2	Q969S9|Q969S9-2|Q969S9-3|Q969S9-4|Q969S9-5	Ribosome-releasing factor 2, mitochondrial OS=Homo sapiens GN=GFM2 PE=1 SV=1|Isoform 2 of Ribosome-releasing factor 2, mitochondrial OS=Homo sapiens GN=GFM2|Isoform 3 of Ribosome-releasing factor 2, mitochondrial OS=Homo sapiens GN=GFM2|Isoform 4 of Ribosome-releasing factor 2, mitochondrial OS=Homo sapiens GN=GFM2|Isoform 5 of Ribosome-releasing factor 2, mitochondrial OS=Homo sapiens GN=GFM2	1	8	2	2	6.65478	4794680	3737520	5273770	5374100	5022280	8080950	4827870	5101030	6199900	6662980	8322980	4049410	4841020	6069780	5671040	7988670	TRUE	4861322.459	3686283.423	5347071.451	5300428.022	5092085.929	7970170.601	4894973.775	5031101.46	6286073.964	6571639.14	8438663.186	3993897.813	4908306.551	5986571.147	5749863.207	7879155.64	4877392.889	4648705.934	6061959.263	5469861.737	6453686.89	6461329.632	7219765.434	5248422.485	5445476.218
KPRP	Q5T749	Keratinocyte proline-rich protein OS=Homo sapiens GN=KPRP PE=1 SV=1	1	8	2	4	7.55837	12498700	8862230	13287900	17902200	16871700	13363000	10182800	14666600	49973100	163083000	21016400	9274300	11823100	21769300	11603300	21740800	TRUE	13890278.8	7974379.47	14767346.66	16108692.3	18750159.36	12024245.91	11316531.4	13197246.51	55536999.17	146744750.1	23356321.49	8345166.794	13139458.93	19588372.11	12895186.86	19562727.35	13936196.91	10056346.98	16741697.71	16623623.46	23763867.96	9747923.892	16691141.97	13767308.39	48110380.17
LTA4H	P09960|P09960-4	Leukotriene A-4 hydrolase OS=Homo sapiens GN=LTA4H PE=1 SV=2|Isoform 4 of Leukotriene A-4 hydrolase OS=Homo sapiens GN=LTA4H	1	8	2	2	6.83487	25394000	16537000	14522000	11120900	16120300	27412400	14380300	14588200	23332800	26457800	21613900	8776640	16821900	22255300	14160000	14216400	TRUE	24394994.06	17214211.12	13950701.1	11576314.96	15486123.6	28534972.54	13814575.61	15185605.29	22414882.15	27541280.46	20763604.08	9136054.538	16160122.49	23166682.76	13602942.26	14798579.61	24475638.38	21708533.02	15815869.03	11946363.95	19627043.66	23132988.35	20375593.43	15841555.35	19417478.76
THOC2	Q8NI27	THO complex subunit 2 OS=Homo sapiens GN=THOC2 PE=1 SV=2	1	8	2	3	6.33547	10000300	8550870	10390700	14341800	9010250	11141300	8204960	12593500	11591100	13808700	16561600	9193240	11902700	10265600	10640600	15861600	TRUE	10411102.82	8213468.518	10817540.08	13775899.15	9380382.508	10701684.95	8542011.96	12096583.83	12067251.37	13263834.29	17241934.79	8830491.789	12391651.6	9860538.451	11077705.74	15235730.66	10445519.57	10357857.89	12263813.55	14216260.15	11888654.76	8675738.269	12598907.68	12619102.02	10453572.57
GSR	P00390|P00390-2|P00390-3	Glutathione reductase, mitochondrial OS=Homo sapiens GN=GSR PE=1 SV=2|Isoform Cytoplasmic of Glutathione reductase, mitochondrial OS=Homo sapiens GN=GSR|Isoform 2 of Glutathione reductase, mitochondrial OS=Homo sapiens GN=GSR	1	8	2	4	6.93634	25202400	17310900	23628700	21049000	17315900	30647200	18820900	22120000	27793900	24037200	35645800	14387400	23684800	28292100	25168900	25664200	TRUE	24253523.85	17988158.29	22739074.02	21872504.83	16663952.39	31846217.4	18112288.79	22985405.8	26747453.28	24977612.86	34303727.45	14950281.53	22793061.84	29398978.28	24221285.14	26668266.35	24333700.51	22684543.92	25779221.7	22571682.28	21119818.59	25817378.13	26714438.64	23978272.28	23170681.98
BAT3|BAG6	A0A024RCR6|A0A0G2JJM1|A0A0G2JK23|A0A0G2JL47|F6S6P2|P46379|P46379-2|P46379-3|P46379-4|P46379-5|X6REW1	HLA-B associated transcript 3, isoform CRA_a OS=Homo sapiens GN=BAT3 PE=1 SV=1|Large proline-rich protein BAG6 (Fragment) OS=Homo sapiens GN=BAG6 PE=1 SV=3|Large proline-rich protein BAG6 OS=Homo sapiens GN=BAG6 PE=1 SV=1|Large proline-rich protein BAG6 OS=Homo sapiens GN=BAG6 PE=1 SV=1|Large proline-rich protein BAG6 (Fragment) OS=Homo sapiens GN=BAG6 PE=1 SV=1|Large proline-rich protein BAG6 OS…	1	8	2	2	6.1578	11759300	7294990	7922670	9031220	7986790	15113100	7214210	9870370	12465600	11618400	17856600	8345150	9768820	10896600	9185660	10186200	TRUE	11749257.58	7301225.233	7915904.054	9038939.238	7979969.296	15126017.59	7208049.078	9878806.483	12454954.4	11628330.57	17841350.5	8352282.834	9760477.446	10905913.63	9177815.463	10194906.43	11788097.96	9207444.241	8974237.271	9327878.366	10113777.33	12262496.07	10631399.87	10305526.63	10789430.47
EHMT1	Q9H9B1	Histone-lysine N-methyltransferase EHMT1 OS=Homo sapiens GN=EHMT1 PE=1 SV=4	1	8	2	3	6.31982	7109020	7414010	7852080	10338300	7538710	8977870	5702980	9440090	10031300	11282300	12671700	6933460	9709090	7687470	9597210	13319500	TRUE	7382778.661	7139093.259	8154452.888	9954948.514	7829015.437	8644964.222	5922593.979	9090044.777	10417591.68	10863944.33	13159669.88	6676362.393	10082973.81	7402413.168	9966785.463	12825603.51	7407184.454	9002982.515	9244679.386	10273168.84	9922459.085	7008377.398	8735437.87	9482693.955	9024511.65
CCT7	Q99832|Q99832-3	T-complex protein 1 subunit eta OS=Homo sapiens GN=CCT7 PE=1 SV=2|Isoform 3 of T-complex protein 1 subunit eta OS=Homo sapiens GN=CCT7	1	8	2	7	7.08337	50966200	41095000	38996100	50443700	45319500	44911300	31419000	51455300	51731400	53397400	73398000	32958900	68650300	60842600	48667700	62071700	TRUE	50585300.39	41404439.09	38704659.81	50823533.38	44980801.42	45249475.25	31184187.82	51842750.57	51344781.61	53799474.29	72849454.7	33207075.5	68137236.98	61300735.51	48303978.4	62539090.45	50752523.93	52214395.82	43879359.6	52448160.68	57008466.17	36683251.83	45994632.78	54082124.95	44478761.91
EIF5B	A0A087WUT6|O60841	Eukaryotic translation initiation factor 5B OS=Homo sapiens GN=EIF5B PE=1 SV=1|Eukaryotic translation initiation factor 5B OS=Homo sapiens GN=EIF5B PE=1 SV=4	1	8	2	3	6.80763	16952400	12029600	12524300	12256000	12462100	21291300	10813400	12309300	14342200	14728300	20944900	8280970	16107200	17126800	13551700	14984300	TRUE	16493570.75	12364247.51	12185320.55	12596945.66	12124804.04	21883595.71	10520727.33	12651728.39	13954017.74	15138021.76	20378010.78	8511335.596	15671246.71	17603244.85	13184913.21	15401143.34	16548094.76	15592330.86	13814462.27	12999620.17	15366922.32	17740790.32	15517383.13	13198226.33	12088033.36
MKI67	A0A087WV66|P46013|P46013-2	Antigen KI-67 OS=Homo sapiens GN=MKI67 PE=1 SV=1|Antigen KI-67 OS=Homo sapiens GN=MKI67 PE=1 SV=2|Isoform Short of Antigen KI-67 OS=Homo sapiens GN=MKI67	1	8	2	5	5.8335	13759500	13638600	13862700	19122000	14110300	15265400	8637830	18466300	21547100	29904700	28102700	15765200	23551100	19813400	19243600	29350700	TRUE	14785176.6	12692463.66	14896069.45	17795469.49	15162126.34	14206409.37	9281721.135	17185256.68	23153288.9	27830152.52	30197564.03	14671537.27	25306673.39	18438905.72	20678078.73	27314584.58	14834053.04	16006238.37	16887630.36	18364320.25	19216410.98	11516979.8	13689930.22	17927582.71	20057142.95
POLR2B	C9J2Y9|C9J4M6|P30876	DNA-directed RNA polymerase subunit beta OS=Homo sapiens GN=POLR2B PE=1 SV=2|DNA-directed RNA polymerase subunit beta OS=Homo sapiens GN=POLR2B PE=1 SV=2|DNA-directed RNA polymerase II subunit RPB2 OS=Homo sapiens GN=POLR2B PE=1 SV=1	1	8	2	6	6.64621	18996100	17736900	15987300	24885300	15695900	19792100	12720800	21311900	20879100	22744100	27211400	14188600	23453900	16835700	17692600	25403400	TRUE	19705182.88	17098644.97	16584070.95	23989812.74	16281793.63	19079889.44	13195639.65	20545000.07	21658471.15	21925662.94	28227142.07	13678029.08	24329382.81	16229874.28	18353026.07	24489269.13	19770323.75	21562794.62	18801312.73	24756672.15	20635472.29	15467856.49	19462703.46	21432451.95	18762217.92
CLYBL	Q8N0X4	Citrate lyase subunit beta-like protein, mitochondrial OS=Homo sapiens GN=CLYBL PE=1 SV=2	1	8	2	3	6.87996	21977900	15745800	25291700	22956500	18682100	28947900	21563700	24347600	25937400	19030800	35610900	14527200	16826000	20050100	25139400	24984100	TRUE	20765216.93	16665350.48	23896170.11	24297153.41	17651270.56	30638449.56	20373871.4	25769493.28	24506242.07	20142193.59	33645983.63	15375584.56	15897585.3	21221020.44	23752273.62	26443164.71	20833862.03	21016374.7	27091018.15	25073837.29	22371141.21	24838254.03	30050124.73	26882619.84	21229174.06
PLD3	Q8IV08	Phospholipase D3 OS=Homo sapiens GN=PLD3 PE=1 SV=1	1	8	2	3	6.45652	11226800	8527040	12706900	12984400	8576610	13320500	9040840	12189100	16942700	16408000	22420500	8596790	12769900	12142600	12658500	16121700	TRUE	11008903.31	8695813.741	12460276.61	13241397.24	8410149.839	13584149.59	8865369.776	12430356.05	16613865.58	16732759.77	21985349.04	8766944.287	12522053.87	12382935.69	12412815.99	16440793.1	11045296.25	10966134.81	14126179.15	13664672.33	10658986.22	11012520.65	13075839.26	12967291.7	14392196.21
ATPAF1	I3L448|Q5TC12|Q5TC12-2|Q5TC12-3	ATP synthase mitochondrial F1 complex assembly factor 1 OS=Homo sapiens GN=ATPAF1 PE=1 SV=1|ATP synthase mitochondrial F1 complex assembly factor 1 OS=Homo sapiens GN=ATPAF1 PE=1 SV=1|Isoform 2 of ATP synthase mitochondrial F1 complex assembly factor 1 OS=Homo sapiens GN=ATPAF1|Isoform 3 of ATP synthase mitochondrial F1 complex assembly factor 1 OS=Homo sapiens GN=ATPAF1	1	8	2	2	5.80845	6079300	4733190	6086390	6131350	3553020	6399200	3167550	5210080	8269330	6873330	9581830	6412510	7596680	7132680	7905490	7980590	TRUE	6156918.453	4673520.071	6164098.976	6054053.881	3598383.762	6318527.175	3207992.211	5144398.06	8374910.018	6786679.958	9704167.575	6331669.38	7693671.849	7042760.409	8006424.631	7879981.058	6177271.829	5893692.372	6988220.978	6247578.033	4560575.456	5122360.475	4731578.214	5366612.99	7254985.16
IPO5	O00410|O00410-3	Importin-5 OS=Homo sapiens GN=IPO5 PE=1 SV=4|Isoform 3 of Importin-5 OS=Homo sapiens GN=IPO5	1	8	2	20	7.73863	119563000	93302500	72034100	70043500	95301800	120401000	69207500	82572100	131370000	100164000	120046000	56970900	130849000	124408000	97710600	85369500	TRUE	111844659.1	99741256.29	67383967.93	74877164.97	89149631.01	128709809.5	64739837.95	88270357.05	122889463	107076264.8	112296479.2	60902431.74	122402096	132993330.4	91402931.9	91260804.14	112214392.2	125781910.1	76393007.33	77270691.72	112987842.9	104343626.7	95487017.03	92083240.69	106456216.1
DNAJA2	O60884	DnaJ homolog subfamily A member 2 OS=Homo sapiens GN=DNAJA2 PE=1 SV=1	1	8	2	3	6.10685	13454500	11363200	11340700	9177110	11696900	17057200	9756590	11056200	16430600	12631800	16069500	6358200	14485900	15512300	11576300	12096000	TRUE	12674094.99	12062886.9	10682902.3	9742188.82	11018441.54	18107493.88	9190675.865	11736983.43	15477571.45	13409600.71	15137416.43	6749704.967	13645670.41	16467466.95	10904836.73	12840808.92	12715992.67	15212290.4	12111175.09	10053608.06	13964723.43	14679546.1	13555644.42	12243968.49	13407851.66
CTBP1	D6RAX2|E7EPF8|E7ESU7|Q13363|Q13363-2	C-terminal-binding protein 1 (Fragment) OS=Homo sapiens GN=CTBP1 PE=1 SV=7|C-terminal-binding protein 1 (Fragment) OS=Homo sapiens GN=CTBP1 PE=1 SV=1|C-terminal-binding protein 1 (Fragment) OS=Homo sapiens GN=CTBP1 PE=1 SV=1|C-terminal-binding protein 1 OS=Homo sapiens GN=CTBP1 PE=1 SV=2|Isoform 2 of C-terminal-binding protein 1 OS=Homo sapiens GN=CTBP1	1	8	2	2	6.39052	5808060	5120660	5432080	5191040	4755250	8778960	4327430	6151470	7101010	7099380	8960640	3932260	9284540	8265430	8261220	10339100	TRUE	5836337.4	5095850.1	5458526.885	5165889.104	4778401.638	8736425.42	4348498.733	6121665.764	7135582.318	7064983.084	9004266.202	3913207.968	9329743.157	8225383.503	8301440.972	10289006.45	5855631.008	6426285.199	6188315.963	5331022.142	6056124.826	7082523.985	6413750.571	6386094.277	6181385.08
MYL12A|MYL12B	J3QRS3|O14950|P19105	Myosin regulatory light chain 12A OS=Homo sapiens GN=MYL12A PE=1 SV=1|Myosin regulatory light chain 12B OS=Homo sapiens GN=MYL12B PE=1 SV=2|Myosin regulatory light chain 12A OS=Homo sapiens GN=MYL12A PE=1 SV=2	1	8	2	2	7.08602	30272300	20720900	24930700	20632000	17170200	42888600	17313500	19120500	28047100	21731800	43293300	15631400	29309400	33377300	34937300	27777100	TRUE	28568522.16	21956659.07	23527556.72	21862457.22	16203831.2	45446402.82	16339066.02	20260813.95	26468560.29	23027847.42	40856677.57	16563629.99	27659815.85	35367865.14	32970967.82	29433678.78	28662963.21	27689149.1	26673122.23	22561313.49	20536663.05	36842898.84	24099051.29	21135990.27	22929083.62
PGAM5	Q96HS1|Q96HS1-2	Serine/threonine-protein phosphatase PGAM5, mitochondrial OS=Homo sapiens GN=PGAM5 PE=1 SV=2|Isoform 2 of Serine/threonine-protein phosphatase PGAM5, mitochondrial OS=Homo sapiens GN=PGAM5	1	8	2	2	6.86208	9293850	5751750	10488100	10021100	6326870	11432400	7897410	8743080	9764820	8978280	16429000	6113860	7964140	10282700	18281400	10810000	TRUE	8636121.019	6189804.615	9745853.533	10784309.3	5879115.221	12303094.24	7338507.561	9408955.002	9073760.309	9662067.888	15266313.98	6579492.996	7400515.056	11065832.82	16987619	11633292.11	8664670.077	7805851.625	11048845.64	11129041.01	7451164.288	9973983.161	10823817.59	9815379.671	7860382.53
CLIC1	O00299	Chloride intracellular channel protein 1 OS=Homo sapiens GN=CLIC1 PE=1 SV=4	1	8	2	7	7.52823	77204900	49081300	42814000	35104900	48199200	86613200	38093400	42275000	81742900	53737300	67813300	24880500	72699800	91752800	52051500	44504400	TRUE	71147711.18	53259856.09	39454984.16	38093569.69	44417682.83	93987049.39	35104743.63	45874099.02	75329677.78	58312246.51	62492938.7	26998711.31	66996063.38	99564211.29	47967746.72	48293299.88	71382909.38	67165049.64	44730000.13	39311270.41	56294772.19	76194267.06	51777195.6	47855654.41	65256306.43
CAPNS1	A0A075B7C0|A0A0C4DGQ5|K7EIV0|K7ELJ7|P04632|U3KQE2	Calpain small subunit 1 (Fragment) OS=Homo sapiens GN=CAPNS1 PE=1 SV=1|Calpain small subunit 1 OS=Homo sapiens GN=CAPNS1 PE=1 SV=1|Calpain small subunit 1 (Fragment) OS=Homo sapiens GN=CAPNS1 PE=1 SV=2|Calpain small subunit 1 OS=Homo sapiens GN=CAPNS1 PE=1 SV=1|Calpain small subunit 1 OS=Homo sapiens GN=CAPNS1 PE=1 SV=1|Calpain small subunit 1 (Fragment) OS=Homo sapiens GN=CAPNS1 PE=1 SV=1	1	8	2	3	6.84091	45721600	28345200	28314000	15672500	28813000	51567100	22888900	23834600	49620500	34338800	36425300	12469300	36028000	40352200	28434400	20098800	TRUE	40045854.77	32362597.92	24799183.14	17893781.52	25236238.75	58875764.62	20047539.13	27212705.38	43460756.76	39205677.77	31903570.16	14236588.29	31555589.82	46071363.9	24904637.04	22947426.13	40178237.28	40811892.03	28114761.38	18465774.93	31984295.91	47729934.73	29568806.03	28388172.24	37649018.88
ANP32B	Q92688|Q92688-2	Acidic leucine-rich nuclear phosphoprotein 32 family member B OS=Homo sapiens GN=ANP32B PE=1 SV=1|Isoform 2 of Acidic leucine-rich nuclear phosphoprotein 32 family member B OS=Homo sapiens GN=ANP32B	1	8	2	4	6.92051	37417000	23175900	21717600	17628500	24139900	52087200	20259400	19571200	42526800	25959700	36663000	12554200	35824000	32714400	22781700	19419800	TRUE	33500798.48	25885133.78	19444555.71	19689249.64	21613328.84	58176128.65	18138976.31	21859048.85	38075787.93	28994356.52	32825714.91	14021770.31	32074527.75	36538672.52	20397283.07	21689950.38	33611544.53	32643278.12	22044235.93	20318637.06	27392636.13	47162747.55	26753800.98	22803261.75	32984148.58
HSDL2	Q6YN16|Q6YN16-2	Hydroxysteroid dehydrogenase-like protein 2 OS=Homo sapiens GN=HSDL2 PE=1 SV=1|Isoform 2 of Hydroxysteroid dehydrogenase-like protein 2 OS=Homo sapiens GN=HSDL2	1	8	2	3	6.12781	14872900	13369800	17586300	20556400	13012300	17520300	13546900	26202200	17013000	17710000	29489200	15044500	20261200	17566100	20161800	26623900	TRUE	15353730.58	12951099.89	18154852.93	19912638.16	13432978.67	16971619.27	13984861.92	25381629.45	17563018.54	17155378.46	30442565.47	14573353.55	20916230.6	17015984.96	20813617.07	25790123.13	15404486.54	16332399.87	20582103.66	20549166.43	17024896.98	13758705.05	20626754.57	26478002.04	15214424.82
CPOX	P36551	Oxygen-dependent coproporphyrinogen-III oxidase, mitochondrial OS=Homo sapiens GN=CPOX PE=1 SV=3	1	8	2	4	6.3452	19148800	15684300	18799600	22649800	14456400	18003700	12602800	19348100	27090600	26489100	37068900	15057700	26981300	24153100	28015000	31722100	TRUE	18822551.96	15956153.26	18479301.46	23042385.07	14210098.81	18315755.02	12388079.56	19683457.28	26629043.39	26948231	36437337.91	15318692.52	26521605.59	24571741.51	27537693.9	32271933.68	18884775.04	20122018.81	20949930.01	23778958.97	18009815.56	14848381.12	18271605.26	20533694.38	23068106.31
ENO1	P06733	Alpha-enolase OS=Homo sapiens GN=ENO1 PE=1 SV=2	1	8	2	12	8.05212	116255000	78388300	74382000	54291900	80253000	143953000	63029000	73965700	125828000	86480800	121024000	41580000	126335000	151200000	87092200	74351200	TRUE	106604899.7	85484174.18	68207695.59	59206517.25	73591355.36	156983929.1	57797085.93	80661231.11	115383263.7	94309224.34	110978034.4	45343909.26	115848178.6	164886942.8	79862846.74	81081627.38	106957311.4	107802559.5	77326864.97	61099115.38	93269354.04	127265144.4	85246912.92	84145434.63	99953774.33
GLUD1	P00367	Glutamate dehydrogenase 1, mitochondrial OS=Homo sapiens GN=GLUD1 PE=1 SV=2	1	8	2	9	7.52584	59567200	50501400	68489800	80351300	58261500	68615800	49888700	71752400	63396100	68313300	112916000	52817500	71118400	62560900	72636900	101152000	TRUE	59714340.11	50376961.19	68658980.3	80153309.04	58405414.83	68446726.1	50011932.73	71575597.31	63552698.08	68144971.48	113194919.8	52687354.16	71294073.35	62406745.77	72816324.27	100902754.7	59911742.18	63529482.57	77838485.13	82715493.24	74022761.06	55489007.92	73764322.31	74667342.19	55054189.3
PSMA3	P25788|P25788-2	Proteasome subunit alpha type-3 OS=Homo sapiens GN=PSMA3 PE=1 SV=2|Isoform 2 of Proteasome subunit alpha type-3 OS=Homo sapiens GN=PSMA3	1	8	2	6	7.42743	47653000	36285800	32645400	28033200	33567900	63902200	28103100	34889500	48646200	42142700	49033000	20120700	47730200	49463900	42132400	40406600	TRUE	45884344.5	37684470.52	31433756.11	29113766.24	32322017.24	66365370.8	27060044.95	36234348.81	46840681.58	43767130.27	47213125.38	20896271.43	45958679.2	51370532.86	40568643.23	41964110.66	46036027.74	47523210.14	35636357.35	30044418.17	40964779.83	53801676.08	39911792.4	37799510.22	40576967.28
SFPQ	P23246	Splicing factor, proline- and glutamine-rich OS=Homo sapiens GN=SFPQ PE=1 SV=2	1	8	2	4	7.10282	27641600	21316600	31563900	33230400	24685600	35691500	23007500	33741100	27873300	27114600	48773400	21379800	29020100	29522000	31845200	41474100	TRUE	27593611.46	21353672.08	31509101.96	33288191.58	24642743.37	35753571.72	22967556.71	33799779.75	27824909.21	27161755.48	48688724.57	21416981.99	28969718.25	29573342.24	31789913.6	41546228.35	27684829.68	26928733.02	35721776.72	34352283.37	31232102.53	28985027.3	33875640.54	35259778.68	24104056.39
COPS4	D6RAX7|Q9BT78|Q9BT78-2	COP9 constitutive photomorphogenic-like protein subunit 4 isoform 2 OS=Homo sapiens GN=COPS4 PE=1 SV=1|COP9 signalosome complex subunit 4 OS=Homo sapiens GN=COPS4 PE=1 SV=1|Isoform 2 of COP9 signalosome complex subunit 4 OS=Homo sapiens GN=COPS4	1	8	2	3	6.15179	7863150	5857580	6250680	4995290	6249350	11226600	6424550	6196180	8873670	9581950	11007500	3907080	8795860	10412100	9466050	8749790	TRUE	7461907.613	6172554.334	5931719.054	5263897.196	5930456.922	11830277.77	6096716.781	6529361.564	8420862.597	10097191.5	10445807.09	4117171.867	8347023.102	10971980.4	8983014.513	9220284.517	7486574.988	7784097.605	6724772.54	5432163.165	7516234.53	9590676.055	8992257.589	6811400.708	7294792.786
MAGOH|MAGOHB	P61326|Q96A72	Protein mago nashi homolog OS=Homo sapiens GN=MAGOH PE=1 SV=1|Protein mago nashi homolog 2 OS=Homo sapiens GN=MAGOHB PE=1 SV=1	1	8	2	5	7.1763	29607200	22359500	32372000	35863000	28275500	36988200	19813700	33407100	35699300	31213900	54459600	22883400	34354800	30036800	36419000	48517000	TRUE	29173396.57	22691981.95	31897686.84	36396276.69	27861208.58	37538208.22	19523390.51	33903857.88	35176235.38	31678045.37	53661660.27	23223672.25	33851434.94	30483442.09	35885390.37	49238439.51	29269837.21	28616451.6	36162314.26	37559721.67	35311170.92	30431812.48	28795721.18	35368352.52	30472335.24
MRE11A	F8W7U8|P49959|P49959-2|P49959-3	Double-strand break repair protein MRE11A OS=Homo sapiens GN=MRE11A PE=1 SV=1|Double-strand break repair protein MRE11A OS=Homo sapiens GN=MRE11A PE=1 SV=3|Isoform 2 of Double-strand break repair protein MRE11A OS=Homo sapiens GN=MRE11A|Isoform 3 of Double-strand break repair protein MRE11A OS=Homo sapiens GN=MRE11A	1	8	2	2	5.88195	3684420	3295000	3423230	5005980	3065740	4475780	3240510	4444140	4752180	5217380	7525680	2920570	5329220	4922320	5555430	6446220	TRUE	3725808.405	3258397.26	3461684.365	4950370.718	3100178.552	4426060.482	3276911.806	4394771.958	4805562.935	5159422.366	7610218.65	2888126.642	5389085.031	4867640.061	5617836.129	6374611.711	3738125.083	4109106.367	3924501.438	5108614.486	3929152.406	3588158.545	4833230.099	4584606.401	4162944.76
SEC16A	A0A0C4DH09|F1T0I1|J3KNL6|O15027|O15027-2|O15027-3|O15027-4|O15027-5|X6RGP5	Protein transport protein Sec16A (Fragment) OS=Homo sapiens GN=SEC16A PE=1 SV=1|Protein transport protein Sec16A OS=Homo sapiens GN=SEC16A PE=1 SV=1|Protein transport protein Sec16A OS=Homo sapiens GN=SEC16A PE=1 SV=1|Protein transport protein Sec16A OS=Homo sapiens GN=SEC16A PE=1 SV=3|Isoform 2 of Protein transport protein Sec16A OS=Homo sapiens GN=SEC16A|Isoform 3 of Protein transport protein S…	1	8	2	2	6.54542	7985570	7713560	5679810	7790970	7647390	8204720	6167150	8463400	9045640	10164900	10047300	6438420	11625600	10977200	8625160	9953680	TRUE	8200917.092	7511010.371	5832977.597	7586387.669	7853617.382	7989273.048	6333459.708	8241160.395	9289574.03	9897980.87	10318245.82	6269354.149	11939107.88	10688950.76	8857754.933	9692307.276	8228027.464	9472000.517	6612829.639	7828894.471	9953639.481	6476815.776	9341437.887	8597141.573	8047336.817
OLA1	J3KQ32|Q9NTK5	Obg-like ATPase 1 OS=Homo sapiens GN=OLA1 PE=1 SV=1|Obg-like ATPase 1 OS=Homo sapiens GN=OLA1 PE=1 SV=2	1	8	2	2	6.42577	12960200	8697300	9004160	8520370	8970620	15610400	7503980	10340100	13946700	11903800	13661700	5658200	13832800	13472900	10493800	12140500	TRUE	12561460.86	8973378.874	8727134.101	8790832.575	8694626.007	16105921.79	7273109.291	10668326.36	13517609.77	12281662.98	13241378.2	5837808.555	13407214.06	13900571.01	10170943.19	12525876.56	12602986.2	11316167.22	9893926.401	9071840.715	11019530.04	13056893.62	10727359.42	11129150.23	11709983.52
PDHA1	P08559|P08559-2|P08559-3|P08559-4	Pyruvate dehydrogenase E1 component subunit alpha, somatic form, mitochondrial OS=Homo sapiens GN=PDHA1 PE=1 SV=3|Isoform 2 of Pyruvate dehydrogenase E1 component subunit alpha, somatic form, mitochondrial OS=Homo sapiens GN=PDHA1|Isoform 3 of Pyruvate dehydrogenase E1 component subunit alpha, somatic form, mitochondrial OS=Homo sapiens GN=PDHA1|Isoform 4 of Pyruvate dehydrogenase E1 component su…	1	8	2	8	7.62495	60254700	44442800	65460000	69163000	44917600	73857500	47178600	64241000	68532500	55923200	111970000	42898800	64549000	59128100	68352600	84006700	TRUE	58446285.66	45817925.83	63495359.85	71303005.3	43569495.5	76142760.06	45762636.48	66228711.36	66475645.42	57653546.35	108609462.9	44226152.19	62611701.54	60957610.68	66301144.73	86605991.29	58639495.83	57780164.81	71984503.73	73582280.3	55219783.38	61728097.99	67496888.9	69089494.74	57586268.98
DPYSL2	Q16555|Q16555-2	Dihydropyrimidinase-related protein 2 OS=Homo sapiens GN=DPYSL2 PE=1 SV=1|Isoform 2 of Dihydropyrimidinase-related protein 2 OS=Homo sapiens GN=DPYSL2	1	8	2	2	6.32802	10576700	8087840	8436450	6733230	7497170	14590800	7330180	7314690	11914600	11347400	13242400	4722540	10641900	12949700	8572260	8779130	TRUE	10130413.27	8444142.901	8080471.703	7029856.711	7180824.878	15233585.26	7020881.066	7636932.436	11411860.22	11847300.04	12683633.34	4930587.476	10192862.14	13520188	8210551.163	9165887.093	10163902.12	10648757.22	9160807.133	7254573.42	9100945.275	12349700	10355339.33	7966813.676	9885822.817
TGM3	Q08188	Protein-glutamine gamma-glutamyltransferase E OS=Homo sapiens GN=TGM3 PE=1 SV=4	1	8	2	2	5.98691	4420440	4013920	6594280	7261140	4382320	5285600	5483060	7385260	10753400	25148000	9952410	3724710	3268760	4775050	3922680	7942790	TRUE	4835615.784	3669293.285	7213626.8	6637713.817	4793915.484	4831789.519	5998038.991	6751177.135	11763378.93	22988845.7	10887158.49	3404914.246	3575767.899	4365074.267	4291105.257	7260838.784	4851601.233	4627279.977	8178067.602	6849895.268	6075787.004	3917078.612	8846714.318	7042797.717	10190335.11
CORO1C	Q9ULV4|Q9ULV4-2|Q9ULV4-3	Coronin-1C OS=Homo sapiens GN=CORO1C PE=1 SV=1|Isoform 2 of Coronin-1C OS=Homo sapiens GN=CORO1C|Isoform 3 of Coronin-1C OS=Homo sapiens GN=CORO1C	1	8	2	6	7.19016	38797400	32729600	39140100	47807100	29377900	43195400	25704600	39729500	48290700	43337600	71824800	30630500	62960600	53239200	57623200	68304400	TRUE	38538209.27	32949724.62	38878619.83	48128629.13	29181637.38	43485912.9	25532877.31	39996702.81	47968088.14	43629069.28	71344965.73	30836507.02	62539984.09	53597263	57238241.24	68763784.78	38665607.86	41552306.98	44076577.57	49667111	36984676.47	35253551.23	37659320.25	41724381.04	41553612.74
PPA1	Q15181	Inorganic pyrophosphatase OS=Homo sapiens GN=PPA1 PE=1 SV=2	1	8	2	4	6.7171	37880400	22682600	19753400	12713900	21318100	40902300	15823200	19629300	46943500	26710600	32243400	11921300	32716700	44733600	24139600	18353600	TRUE	34262004.85	25078099.33	17866524.29	14056609.34	19281761.69	45221973.77	14311743.15	21702341.67	42459383.34	29531494.63	29163459.92	13180303.21	29591549.57	49457895.67	21833747.59	20291915.56	34375267.27	31625541.45	20255226.32	14505943.54	24437618.38	36660956.69	21108882.96	22639785.53	36781552.93
SRGAP2	A2RUF3|B7ZM87|O75044|Q5VZB4	SLIT-ROBO Rho GTPase activating protein 2 OS=Homo sapiens GN=SRGAP2 PE=1 SV=1|SLIT-ROBO Rho GTPase-activating protein 2 OS=Homo sapiens GN=SRGAP2 PE=1 SV=1|SLIT-ROBO Rho GTPase-activating protein 2 OS=Homo sapiens GN=SRGAP2 PE=1 SV=2|SLIT-ROBO Rho GTPase activating protein 2 (Fragment) OS=Homo sapiens GN=SRGAP2 PE=1 SV=1	1	8	2	2	6.33642	12826200	10699100	8767780	11389800	10207600	15434200	7828490	10684800	14570300	13955600	16477400	7455400	14509300	16021100	11626500	11414800	TRUE	12865858.18	10666120.71	8794889.68	11354691.68	10239161.56	15386625.07	7852695.427	10651864.79	14615350.88	13912582.76	16528347.57	7432419.21	14554162.27	15971715.99	11662448.75	11379614.62	12908389.79	13450853.6	9970740.704	11717656.25	12977067.48	12473767.69	11582210.98	11111977.59	12660930.51
CLPX	O76031	ATP-dependent Clp protease ATP-binding subunit clpX-like, mitochondrial OS=Homo sapiens GN=CLPX PE=1 SV=2	1	8	2	2	5.90336	6998360	6516430	6620400	7958020	5818850	7148050	4391610	8391990	8083040	8481040	10678300	7192510	8916110	8107270	7935810	10865800	TRUE	7374677.718	6183907.257	6976393.95	7551935.282	6131742.785	6783296.723	4627756.847	7963760.504	8517683.426	8048266.428	11252496.45	6825488.003	9395549.492	7693569.299	8362536.534	10311336.03	7399056.73	7798414.573	7909117.413	7793340.777	7771343.331	5499144.036	6825637.983	8307759.251	7378666.364
ACADVL	P49748|P49748-2|P49748-3	Very long-chain specific acyl-CoA dehydrogenase, mitochondrial OS=Homo sapiens GN=ACADVL PE=1 SV=1|Isoform 2 of Very long-chain specific acyl-CoA dehydrogenase, mitochondrial OS=Homo sapiens GN=ACADVL|Isoform 3 of Very long-chain specific acyl-CoA dehydrogenase, mitochondrial OS=Homo sapiens GN=ACADVL	1	8	2	8	6.79377	55025200	55210900	47840900	78923600	41193000	40367200	33860200	59208000	48156400	55731500	77486300	43559100	62610600	47062100	47175400	69889600	TRUE	57558686.45	52780753.04	50043604.79	75449721.71	43089620.23	38590409.03	35419201.29	56601917.84	50373631.14	53278438.46	81053947.02	41641815.29	65493335.67	44990628.26	49347463.65	66813359.64	57748962.42	66560861.37	56734288.37	77861550.83	54611591.6	31284820.1	52241000.04	59046866.91	43637477.37
CUL5	Q93034	Cullin-5 OS=Homo sapiens GN=CUL5 PE=1 SV=4	1	8	2	2	5.83595	8057810	5408000	5596550	4998620	6460360	9853550	5043770	6716400	10312700	12507200	9800520	3913400	9739080	10668600	7970640	7747270	TRUE	7826720.128	5567675.318	5436046.585	5146208.062	6275083.384	10144483.57	4899119.758	6914706.825	10016942.15	12876484.6	9519450.961	4028946.115	9459772.998	10983598.54	7742050.076	7976014.046	7852593.49	7021295.524	6162830.112	5310711.975	7953012.565	8224021.236	7225880.487	7213391.156	8677438.507
PLS1	Q14651	Plastin-1 OS=Homo sapiens GN=PLS1 PE=1 SV=2	1	8	2	5	6.43169	37369000	27935200	27345300	23711400	25659800	48428000	22338800	25706800	41123700	32452300	41418400	18901300	36104800	41097000	33887500	32026000	TRUE	35979540.91	29014002.47	26328543.45	24627087.62	24705713.93	50298194.09	21508195.79	26699546.04	39594633.16	33705543.98	39878375.59	19631231.02	34762346.56	42684085.29	32627490.5	33262781.12	36098481.12	36589038.33	29848592.69	25414318.19	31311911.14	40776192.66	31723178.85	27852846.72	34299888.05
NUP160	Q12769	Nuclear pore complex protein Nup160 OS=Homo sapiens GN=NUP160 PE=1 SV=3	1	8	2	8	6.85446	26847500	24523700	25293100	37606700	24375500	22488100	19479100	29989500	31305400	36397200	47607100	21782700	35346700	30043700	30647000	46930100	TRUE	27337588.57	24084056.8	25754813.72	36932514.21	24820463.36	22084949.57	19834681.87	29451869.88	31876865.45	35744697.25	48476145.36	21392195.47	35991937.49	29505098.22	31206446.66	46088771.02	27427960.44	30371972.23	29198156.98	38113100.58	31457344.05	17904025.67	29254855.52	30724058.6	27614169.62
FSCN1	Q16658	Fascin OS=Homo sapiens GN=FSCN1 PE=1 SV=3	1	8	2	5	6.78873	29204000	12060600	20208100	12046400	15416500	36795700	16698700	15139100	29190500	18658400	30425800	9878950	21099800	34598400	21006600	15989200	TRUE	25803711.26	13649887.76	17855224.54	13633816.55	13621521.53	41644460.05	14754432.04	17134057.65	25791783.1	21117114.05	26883254.28	11180750.43	18643101.87	39157610.44	18560753.36	18096179.73	25889012.48	17213628.73	20242415.83	14069635.73	17263855.35	33760705.66	21761820.05	17874172.12	22342807.65
EFL1	Q7Z2Z2|Q7Z2Z2-2	Elongation factor-like GTPase 1 OS=Homo sapiens GN=EFL1 PE=1 SV=2|Isoform 2 of Elongation factor-like GTPase 1 OS=Homo sapiens GN=EFL1	1	8	2	2	6.03726	10603300	6507620	7747410	5144790	6874250	12038800	5871360	6925090	9175080	8155440	12188200	4059010	10768600	12342400	8709680	8569770	TRUE	9794644.79	7044895.311	7156557.769	5569548.767	6349988.866	13032734.8	5423583.755	7496832.032	8475347.252	8828760.9	11258673.21	4394125.735	9947338.27	13361400.31	8045440.743	9277298.38	9827023.665	8884191.171	8113368.608	5747585.207	8047947.437	10565494.74	7999430.502	7820661.562	7341991.545
LANCL2	Q9NS86	LanC-like protein 2 OS=Homo sapiens GN=LANCL2 PE=1 SV=1	1	8	2	3	6.35935	14551900	10524300	9996610	8932940	11932000	18809700	8985600	10774200	16885700	14773100	15809600	6109950	15821600	18234000	12727800	12422700	TRUE	13871152.09	11040796.05	9528961.692	9371337.636	11373812.81	19732814.68	8565247.437	11302960.27	16095775.31	15498112.38	15070016.01	6409805.102	15081454.64	19128861.32	12132384.74	13032362.92	13917006.97	13923349.96	10802956	9670902.226	14415119.4	15997175.79	12633178.48	11791197.48	13943386.95
PREPL	Q4J6C6|Q4J6C6-3|Q4J6C6-4	Prolyl endopeptidase-like OS=Homo sapiens GN=PREPL PE=1 SV=1|Isoform 3 of Prolyl endopeptidase-like OS=Homo sapiens GN=PREPL|Isoform 4 of Prolyl endopeptidase-like OS=Homo sapiens GN=PREPL	1	8	2	4	6.52269	15111100	14805500	12930900	16205200	14190900	16125800	9848490	16320300	16659500	20011000	22177300	11474700	19864500	14380200	14175400	18692200	TRUE	15412593.56	14515882.1	13188894.66	15888201.86	14474033.92	15810355.04	10044985.05	16001050.33	16991886.92	19619554.68	22619776.93	11250237.57	20260832.42	14098901.61	14458224.67	18326552.39	15463544.1	18305718.67	14952211.3	16396084.82	18344325.74	12817280.92	14815694.46	16692223.96	14719667.1
AAMP	C9JEH3|C9JG97|Q13685	Angio-associated migratory cell protein OS=Homo sapiens GN=AAMP PE=1 SV=1|Angio-associated migratory cell protein OS=Homo sapiens GN=AAMP PE=1 SV=1|Angio-associated migratory cell protein OS=Homo sapiens GN=AAMP PE=1 SV=2	1	8	2	2	6.45424	11236200	6232330	7914800	4550370	7384080	15392200	7350350	6768230	10151500	8393420	10709400	4554600	7351160	10541200	7214670	5646130	TRUE	10281469.31	6811060.196	7242285.938	4972914.461	6756660.781	16821509.89	6725796.792	7396723.529	9288935.374	9172827.638	9799431.069	4977537.257	6726537.967	11520049.12	6601645.41	6170426.037	10315457.51	8589305.901	8210558.383	5131878.864	8563361.599	13637013.03	9920109.366	7716228.821	8046783.566
PSME2	A0A087X1Z3|H0YM70|Q9UL46	Proteasome activator complex subunit 2 OS=Homo sapiens GN=PSME2 PE=1 SV=1|Proteasome activator complex subunit 2 OS=Homo sapiens GN=PSME2 PE=1 SV=1|Proteasome activator complex subunit 2 OS=Homo sapiens GN=PSME2 PE=1 SV=4	1	8	2	3	6.74956	29248500	20156200	18946800	14202100	20080100	29045700	15312700	19434100	31989600	23586600	30151600	11615400	27831800	32311100	21266600	19338800	TRUE	27037755.61	21804273.41	17514708.38	15363335.91	18562348.03	31420624.13	14155291.4	21023130.84	29571669.9	25515160.35	27872594.91	12565134.17	25728136.71	34953019.84	19659166.57	20920038.63	27127136.3	27496978.27	19856373.66	15854440.98	23525836.73	25472354.35	20878126.87	21931235.83	25617233.59
NUDT5	A6NFX8|Q9UKK9	ADP-sugar pyrophosphatase OS=Homo sapiens GN=NUDT5 PE=1 SV=1|ADP-sugar pyrophosphatase OS=Homo sapiens GN=NUDT5 PE=1 SV=1	1	8	2	4	6.79712	32415400	22210800	21452200	14930200	23155200	40730900	16166900	17980700	42602900	23619800	28752700	10930500	31168400	37336400	23653700	19869700	TRUE	29293721.13	24577688.96	19386302.94	16521233.44	20925300.06	45071379.29	14609989.7	19896809.29	38500141.04	26136838.73	25983747.71	12095306.3	28166810.15	41315145.16	21375793.34	21987110.16	29390559.53	30994482.9	21978194.94	17049351.91	26520631.53	36538871.4	21548777.07	20756262.24	33351755.58
UTP4	H3BSH7|Q969X6|Q969X6-3	U3 small nucleolar RNA-associated protein 4 homolog (Fragment) OS=Homo sapiens GN=UTP4 PE=1 SV=1|U3 small nucleolar RNA-associated protein 4 homolog OS=Homo sapiens GN=UTP4 PE=1 SV=1|Isoform 3 of U3 small nucleolar RNA-associated protein 4 homolog OS=Homo sapiens GN=UTP4	1	8	2	3	6.36542	11993400	10937000	12911900	18595400	12553800	13859700	10262400	16687600	13163800	16496100	20715800	11385000	14624000	11788000	12958700	17395900	TRUE	12423427.13	10558424.37	13374860.24	17951734.9	13003920.45	13379957.42	10630361.58	16109971.89	13635792.19	15925100.51	21458571.53	10990917.2	15148348.12	11379967.68	13423338.27	16793754.64	12464496.16	13315039.68	15163039.93	18525580.84	16481110.51	10846984.29	15679086.47	16805850.44	11812362.14
LDHB	P07195	L-lactate dehydrogenase B chain OS=Homo sapiens GN=LDHB PE=1 SV=2	1	8	2	7	7.57187	102394000	69485100	68786200	43270400	71478600	138941000	50710100	64727200	99108600	67748300	94783700	35144300	87916900	102866000	73795400	63470700	TRUE	94351723.89	75407814.89	63383563	46958647.44	65864495.3	150783940.8	46727204.27	70244364.85	91324367.27	73522974.93	87339155.53	38139901.49	81011690.86	111634009.1	67999328.14	68880764.31	94663629.3	95095443.4	71857759.96	48459729.63	83476366.22	122238882.2	68919563.14	73278606.45	79112125.13
OAT	P04181	Ornithine aminotransferase, mitochondrial OS=Homo sapiens GN=OAT PE=1 SV=1	1	8	2	8	7.02474	34782900	34891600	25728100	40144900	28054300	32379900	19147200	34587700	45591400	42308500	48297400	29627500	47193500	37975600	31567200	39689000	TRUE	36182074.18	33542328.93	26763036.52	38592481.88	29182810.05	31127757.3	19917413.75	33250180.86	47425356.05	40672414.66	50240207.39	28481793.62	49091902	36507069.51	32837019.69	38154211.7	36301683.92	42299629.65	30341176.21	39826130.85	36986162.7	25234930.43	29376879.62	34686439.58	41083456.85
MSH2	E9PHA6|P43246|V9H019	DNA mismatch repair protein OS=Homo sapiens GN=MSH2 PE=1 SV=1|DNA mismatch repair protein Msh2 OS=Homo sapiens GN=MSH2 PE=1 SV=1|DNA mismatch repair protein Msh2 OS=Homo sapiens GN=MSH2 PE=1 SV=1	1	8	2	2	6.35899	9670000	7561080	7349190	7270850	8046590	12873900	6940040	8195910	10634700	10579400	11702300	4943200	11284600	12280400	8976640	9991620	TRUE	9492898.384	7702141.184	7214592.955	7406496.589	7899220.394	13114078.33	6812936.35	8348814.713	10439930.35	10776771.63	11487977.74	5035421.435	11077927.73	12509505.86	8812236.954	10178025.88	9524279.754	9713032.159	8179162.929	7643252.984	10011436.53	10631439.05	10048634.5	8709446.075	9043863.107
PDHB	P11177|P11177-2|P11177-3	Pyruvate dehydrogenase E1 component subunit beta, mitochondrial OS=Homo sapiens GN=PDHB PE=1 SV=3|Isoform 2 of Pyruvate dehydrogenase E1 component subunit beta, mitochondrial OS=Homo sapiens GN=PDHB|Isoform 3 of Pyruvate dehydrogenase E1 component subunit beta, mitochondrial OS=Homo sapiens GN=PDHB	1	8	2	4	7.11021	28385800	21963400	30160400	30188300	19910900	28841300	15428900	29045000	30885800	20629200	52753800	21970900	30700700	27291100	33499700	38994000	TRUE	27516241.62	22657479.48	29236479.29	31142299.81	19300958.06	29752732.4	14956257.72	29962869.65	29939657.69	21281116.57	51137762.79	22665216.49	29760227.97	28153543.54	32473484.61	40226274.38	27607204.07	28572941.15	33145311.04	32137795.93	24461947.76	24120212.87	22059499.69	31257131.28	25936012.66
RCN2	Q14257|Q14257-2	Reticulocalbin-2 OS=Homo sapiens GN=RCN2 PE=1 SV=1|Isoform 2 of Reticulocalbin-2 OS=Homo sapiens GN=RCN2	1	8	2	10	7.86303	60207200	61199700	69423300	90730500	62216500	58694700	50449700	72264000	81468300	68852700	111458000	55584700	80412100	56877000	82906100	101854000	TRUE	58649793.03	62824818.09	67627495.98	93139789.21	60607117.55	60253299.45	49144694.71	74182923.35	79360922.5	70681038.51	108574865.3	57060715.43	78332043.71	58387331.61	80761530.27	104558666.5	58843675.94	79227251.74	76669094.37	96117099.8	76813189.22	48846687.06	72485203.07	77387293.03	68748477.75
CKAP4	Q07065	Cytoskeleton-associated protein 4 OS=Homo sapiens GN=CKAP4 PE=1 SV=2	1	8	2	4	6.51509	21427200	13595000	21112400	20937400	14393600	26270300	16314900	20123300	26587600	21370000	41943300	16764700	19822300	21111500	24957600	23843300	TRUE	20420445.08	14265251.46	20120435.93	21969641.48	13717318.1	27565460.49	15548346	21115405.27	25338384.19	22423569.23	39972598.12	17591221.85	18890951.16	22152324.84	23784969.58	25018806.18	20487950.45	17989652.86	22810479.36	22671924	17385267.5	22347015.59	22932791.1	22027496.1	21950038.97
CCT4	P50991	T-complex protein 1 subunit delta OS=Homo sapiens GN=CCT4 PE=1 SV=4	1	8	2	8	7.43471	60256100	53723500	52122100	58569200	60267200	73885600	44565000	68084700	65814800	67196800	91705500	44959700	80286800	72407100	61293100	84312000	TRUE	60834763.95	53212478.82	52622649.82	58012086.23	60845970.55	73182795.71	44992975.9	67437074.22	66446846.42	66557619.98	92586185.39	44532040.62	81057826.95	71718359.29	61881722.68	83510019.16	61035869.89	67105303.02	59658144.17	59866503.13	77115910.44	59328487.45	66361690	70350053.46	57561321.1
MPHOSPH8	Q99549|Q99549-2	M-phase phosphoprotein 8 OS=Homo sapiens GN=MPHOSPH8 PE=1 SV=2|Isoform 2 of M-phase phosphoprotein 8 OS=Homo sapiens GN=MPHOSPH8	1	8	2	2	5.66366	6094580	5874940	5806770	8691600	5356870	6866450	5093650	6999720	8051380	10123800	12578700	6029480	8624720	7803530	8867930	10875200	TRUE	6300025.054	5683357.053	6002513.132	8408165.217	5537447.242	6642533.717	5265354.236	6771457.756	8322787.743	9793660.894	13002721.3	5832857.473	8915454.73	7549055.354	9166863.21	10520557.59	6320851.509	7167179.685	6805031.579	8676940.996	7018135.823	5385029.015	7766052.333	7063954.37	7209832.874
NOL6	A0A0A0MRW6|Q9H6R4|Q9H6R4-2|Q9H6R4-4	Nucleolar protein 6 OS=Homo sapiens GN=NOL6 PE=1 SV=1|Nucleolar protein 6 OS=Homo sapiens GN=NOL6 PE=1 SV=2|Isoform 2 of Nucleolar protein 6 OS=Homo sapiens GN=NOL6|Isoform 4 of Nucleolar protein 6 OS=Homo sapiens GN=NOL6	1	8	2	2	5.94858	4607400	4430850	4906350	5979980	3756900	5970050	3077330	5106160	6280590	6437140	10199400	3763120	6373580	6140960	6611220	8512840	TRUE	4715638.006	4329148.731	5021611.002	5842721.561	3845157.882	5833019.485	3149623.281	4988958.346	6428134.936	6289388.371	10439006.44	3676745.133	6523309.476	6000006.589	6766532.165	8317444.844	4731226.836	5459411.85	5692985.704	6029490.256	4873335.87	4728764.732	4645487.869	5204458.977	5568540.255
LASP1	Q14847	LIM and SH3 domain protein 1 OS=Homo sapiens GN=LASP1 PE=1 SV=2	1	8	2	3	7.00721	25475600	15255600	21466400	10831600	18711000	42959600	15286500	15269700	31340900	15979200	24292000	7911250	28426400	24600700	17596500	14157000	TRUE	21757395.9	17862687.48	18333344.98	12682653.3	15980099.96	50301129.37	13055411.15	17879197.09	26766646.09	18709946.24	20746544.19	9263233.59	24277521.97	28804807.15	15028263	16576343.55	21829320.92	22526314.93	20784459.57	13088067.56	20253107.09	40778572.25	19255875.62	18651498.23	23187308.25
EEF1A1|EEF1A1P5	P68104|Q5VTE0	Elongation factor 1-alpha 1 OS=Homo sapiens GN=EEF1A1 PE=1 SV=1|Putative elongation factor 1-alpha-like 3 OS=Homo sapiens GN=EEF1A1P5 PE=5 SV=1	1	8	2	6	7.91569	46479700	35731800	31692800	20749600	35915300	64728700	30019900	29447600	51292100	29906200	46111600	16239700	49902400	58373700	39376300	30148300	TRUE	41508030.79	40011614.93	28302801.4	23234905.75	32073644.58	72481649.94	26808842	32974718.09	45805675.72	33488247.4	41179304.35	18184827.6	44564624.03	65365472.95	35164441.09	33759345.19	41645246.93	50457930.24	32086803.15	23977633.77	40649993.43	58760076.29	39541284.52	34399078.06	39680366.35
PTMA	B8ZZQ6|P06454|P06454-2	Prothymosin alpha OS=Homo sapiens GN=PTMA PE=1 SV=1|Prothymosin alpha OS=Homo sapiens GN=PTMA PE=1 SV=2|Isoform 2 of Prothymosin alpha OS=Homo sapiens GN=PTMA	1	8	2	3	6.90889	46806300	20926300	22330700	16969100	19192900	56097800	16932500	17581000	34269000	22949600	34411300	13061900	24327400	26668300	29737600	17253100	TRUE	41847914.64	23405770.25	19965116.4	18979698.08	17159716.55	62744595	15138770.1	19664099.57	30638742.8	25668802.65	30765968.37	14609550.2	21750297.69	29828115.95	26587372.78	19297348.06	41986254.36	29516597.23	22634394.06	19586403.94	21748147.87	50866352.96	22328693.49	20513500.5	26541613.44
PLRG1	O43660|O43660-2	Pleiotropic regulator 1 OS=Homo sapiens GN=PLRG1 PE=1 SV=1|Isoform 2 of Pleiotropic regulator 1 OS=Homo sapiens GN=PLRG1	1	8	2	2	6.14378	4610620	4384230	4294860	5052380	4474340	6035380	3586700	4347230	6043220	4538330	6904030	4365070	4818420	5640200	5087550	7262940	TRUE	4719158.689	4283394.532	4395965.377	4936177.36	4579670.519	5896568.768	3671134.569	4247245.517	6185483.551	4433950.296	7066557.895	4264675.204	4931850.512	5510477.744	5207316.106	7095895.398	4734759.157	5401712.049	4983693.089	5093967.422	5804253.895	4780283.437	5414682.833	4430707.48	5358337.138
ZNF90|RPS16	A0A087WZ27|M0R210|P62249	Zinc finger protein 90 OS=Homo sapiens GN=ZNF90 PE=4 SV=2|40S ribosomal protein S16 OS=Homo sapiens GN=RPS16 PE=1 SV=1|40S ribosomal protein S16 OS=Homo sapiens GN=RPS16 PE=1 SV=2	1	8	2	3	7.18003	23677300	16317600	22600300	16993500	18443900	28826300	17615500	18507300	23563700	22984300	31106000	12928000	27120600	23953800	23722000	23439700	TRUE	21965769.17	17589036.27	20966620.89	18317601.1	17110669.29	31072390.31	16342150.78	19949353.51	21860380.83	24775192.81	28857480.19	13935325.1	25160167.73	25820234.4	22007238	25266076.71	22038383.02	22181218.29	23769796.78	18903142.35	21685985.59	25190045.02	24103601.12	20811076.14	18937127.46
MARS2	Q96GW9	Methionine--tRNA ligase, mitochondrial OS=Homo sapiens GN=MARS2 PE=1 SV=2	1	8	2	2	6.85674	9316150	7792420	9729500	11076900	8043230	11386400	8477030	9951140	9143500	10653800	13958900	6864590	9572570	9677870	11544300	13500300	TRUE	9356769.296	7758591.805	9771921.541	11028813.33	8078299.244	11336969.74	8513990.653	9907940.442	9183366.526	10607550.08	14019762.13	6834789.67	9614307.312	9635856.752	11594634.24	13441692.95	9387700.654	9784221.025	11078398.87	11381360.86	10238400.27	9190756.658	12557578.09	10335919.04	7955331.785
PHYHIPL	Q96FC7|Q96FC7-2	Phytanoyl-CoA hydroxylase-interacting protein-like OS=Homo sapiens GN=PHYHIPL PE=1 SV=3|Isoform 2 of Phytanoyl-CoA hydroxylase-interacting protein-like OS=Homo sapiens GN=PHYHIPL	1	8	2	3	6.37773	17640200	11033300	11314900	9539810	13064300	19514900	10235200	12798000	19251100	15727400	17008100	7054820	15527300	17774600	12440300	12162300	TRUE	16587257.13	11733683.1	10639514.05	10145387.82	12284492.43	20753686.78	9624261.298	13610404.53	18102002.57	16725759.98	15992887.15	7502653.079	14600476.05	18902914.24	11697738.96	12934350.92	16642090.84	14797137.39	12061985.95	10469695.73	15569310.66	16824785.58	14195154.51	14198312.98	15681333.85
DHX9	Q08211	ATP-dependent RNA helicase A OS=Homo sapiens GN=DHX9 PE=1 SV=4	1	8	2	24	7.88451	116514000	103541000	128810000	174111000	101622000	111329000	86393000	144159000	132620000	143077000	227306000	109145000	163274000	123310000	146821000	204712000	TRUE	117835774.6	102379571.1	130271264.7	172157981	102774834.7	110080212.4	87373071.72	142541955.3	134124486.6	141472092.2	229884637	107920710.6	165126236.1	121926820.5	148486587.6	202415726.8	118225313	129109041.7	147688151.7	177661190.6	130256365	89240817.32	128869553.1	148699128.7	116188849.5
EPN1	Q9Y6I3|Q9Y6I3-1|Q9Y6I3-3	Epsin-1 OS=Homo sapiens GN=EPN1 PE=1 SV=2|Isoform 2 of Epsin-1 OS=Homo sapiens GN=EPN1|Isoform 3 of Epsin-1 OS=Homo sapiens GN=EPN1	1	8	2	2	5.96994	4122770	3503710	4059930	6040040	4332390	5588740	3061840	4903060	6205260	5071530	8503820	4511610	7588460	5771560	6186510	8164090	TRUE	4155908.266	3475772.215	4092563.166	5991878.097	4367213.163	5544176.661	3086450.654	4863964.117	6255137.038	5031090.775	8572172.551	4475635.45	7649455.011	5725538.896	6236236.328	8098991.406	4169646.756	4383234.024	4639726.89	6183414.736	5534986.394	4494603.031	4552312.386	5074065.558	5418676.295
SOD2	A0A0C4DFU2|F5GYZ5|F5H3C5|F5H4R2|P04179|P04179-4	Superoxide dismutase OS=Homo sapiens GN=SOD2 PE=1 SV=1|Superoxide dismutase (Fragment) OS=Homo sapiens GN=SOD2 PE=1 SV=1|Superoxide dismutase (Fragment) OS=Homo sapiens GN=SOD2 PE=1 SV=1|Superoxide dismutase (Fragment) OS=Homo sapiens GN=SOD2 PE=1 SV=1|Superoxide dismutase [Mn], mitochondrial OS=Homo sapiens GN=SOD2 PE=1 SV=2|Isoform 4 of Superoxide dismutase [Mn], mitochondrial OS=Homo sapiens G…	1	8	2	3	7.03246	29003700	17151100	52595000	34042500	18770900	44171800	30795400	32840900	29604400	22391000	82234800	21416500	23530200	26887600	48557400	50309900	TRUE	26414558.76	18832241.86	47899878.9	37379328.06	17095234.09	48501496.75	28046314.87	36059947.85	26961634.66	24585754.12	74893753.43	23515734.14	21429674.51	29523108.5	44222712.8	55241250.1	26501879.3	23749002.57	54303952.6	38574197.3	21666423.09	39319629.89	41366475.9	37617575.92	23356222.21
ACTL6A	O96019|O96019-2	Actin-like protein 6A OS=Homo sapiens GN=ACTL6A PE=1 SV=1|Isoform 2 of Actin-like protein 6A OS=Homo sapiens GN=ACTL6A	1	8	2	2	6.34063	6449890	5017850	5554170	7700720	5033850	6412550	3408790	6430400	10583200	14990300	11202700	4459280	9516830	7721920	7593520	9780270	TRUE	6622888.163	4886777.452	5703143.27	7499567.515	5168867.31	6245046.135	3500220.149	6262429.87	10867061.3	14598734.52	11503177.45	4342798.002	9772089.253	7520213.745	7797192.467	9524797.056	6644781.929	6162627.431	6465636.842	7739299.02	6550999.269	5062790.204	5162595.267	6532938.762	9413876.482
EEA1	Q15075	Early endosome antigen 1 OS=Homo sapiens GN=EEA1 PE=1 SV=2	1	8	2	18	6.87137	97836700	76635400	110842000	124910000	79927300	124695000	76782300	111227000	110236000	115393000	193894000	82519700	104725000	100464000	123733000	149326000	TRUE	98011202.71	76498955.55	111039699.1	124687605.7	80069859.29	124472988.5	76919249.83	111028967.4	110432618.2	115187550.1	194239831.7	82372778.93	104911788.8	100285130.2	123953691.7	149060134.6	98335205.52	96471461.33	125885382.1	128673375.2	101480180.9	100908882.5	113450851.1	115824921	95665148.03
FXN	C9JAX1|H7C585|Q16595	Frataxin, mitochondrial OS=Homo sapiens GN=FXN PE=1 SV=1|Frataxin, mitochondrial (Fragment) OS=Homo sapiens GN=FXN PE=1 SV=1|Frataxin, mitochondrial OS=Homo sapiens GN=FXN PE=1 SV=2	1	8	2	3	6.24594	17748700	12568100	16282600	18258200	11985400	17597600	8776600	14368800	23870000	15749800	31721500	13261500	21350400	20901500	24223600	27540100	TRUE	17165632.56	12995002.41	15747695.82	18878378.83	11591664.32	18195340.14	8488277.492	14856867.04	23085840.04	16284775.66	30679408.25	13711955.22	20649012.12	21611464.17	23427823.83	28475558.43	17222378.25	16387764.56	17853116.68	19481845.92	14691223.42	14750762.1	12519652.86	15498617.08	19998713.61
PFN2	C9J0J7|G5E9Q6|P35080-2	Profilin OS=Homo sapiens GN=PFN2 PE=1 SV=1|Profilin OS=Homo sapiens GN=PFN2 PE=1 SV=1|Isoform IIb of Profilin-2 OS=Homo sapiens GN=PFN2	1	8	2	2	6.62711	14437600	7775180	9130530	7572530	8119980	15967900	7164850	8964320	15749000	13356300	14477100	5843000	12959000	15096700	10898800	9765860	TRUE	13618196.38	8243010.723	8612328.266	8028167.321	7659131.865	16928684.73	6758210.112	9503700.993	14855168.09	14159945.38	13655454.56	6194571.914	12223514.08	16005064.83	10280240.39	10353469.46	13663215.05	10395113.04	9763771.362	8284796.07	9707149.408	13723898.49	9967916.889	9914218.264	12868678.44
CCAR2	Q8N163|Q8N163-2	Cell cycle and apoptosis regulator protein 2 OS=Homo sapiens GN=CCAR2 PE=1 SV=2|Isoform 2 of Cell cycle and apoptosis regulator protein 2 OS=Homo sapiens GN=CCAR2	1	8	2	11	7.41095	51004400	36072300	57172500	64648000	36013500	68688800	38738000	45378500	52699500	53851700	96149500	43167600	56943800	50676100	69939100	84562300	TRUE	50605818.18	36356412.84	56725716.61	65157180.92	35732066.9	69229807.1	38435275.87	45735910.39	52287671.56	54275847.05	95398124.78	43507596.88	56498803.82	51075235.37	69392550.02	85228330.04	50773109.54	45848420.42	64309778.98	67239998.23	45286661.49	56123843.07	56689512.33	47711496.65	45295565.02
HNRNPL	P14866	Heterogeneous nuclear ribonucleoprotein L OS=Homo sapiens GN=HNRNPL PE=1 SV=2	1	8	2	8	7.84065	32194000	30254900	38093700	48341600	27493400	40247300	23206500	38027700	35779400	30726000	58223400	30089000	39621400	31702200	37509500	46997300	TRUE	32683047.76	29802185.46	38672368.03	47618247.9	27911042.59	39645065.72	23559021.8	37458678.36	36322912.31	30266236.22	59107851.24	29638767.88	40223274.79	31227829.01	38079293.65	46294063.13	32791090.5	37583001.77	43842750.51	49140414.91	35374330.32	32139818.67	34748012.77	39076725.31	31465674.17
PTER	Q96BW5|Q96BW5-2	Phosphotriesterase-related protein OS=Homo sapiens GN=PTER PE=1 SV=1|Isoform 2 of Phosphotriesterase-related protein OS=Homo sapiens GN=PTER	1	8	2	2	6.4583	14014600	8775040	8611320	6139510	10026000	16814000	8701660	9861830	15936900	11127600	13047000	5307680	12665800	16067100	9354550	8767150	TRUE	12961444.68	9488037.687	7964205.028	6638363.16	9272576.052	18180186.72	8047756.247	10663132.56	14739289.58	12031750.07	12066556.93	5738944.537	11714002.97	17372598.91	8651583.514	9479506.602	13004292.28	11965194.22	9028995.943	6850565.368	11752021.34	14738477.39	11869912.9	11123732.07	12768295.65
PPA2	Q9H2U2|Q9H2U2-2	Inorganic pyrophosphatase 2, mitochondrial OS=Homo sapiens GN=PPA2 PE=1 SV=2|Isoform 2 of Inorganic pyrophosphatase 2, mitochondrial OS=Homo sapiens GN=PPA2	1	8	2	8	7.36463	55526900	45079000	56361400	57694500	43704300	66224800	36991700	56223700	74834700	50099600	98650900	40218400	64686300	62941800	62948000	72034200	TRUE	53677902.37	46631798.46	54484614.24	59681854	42248984.7	68505990.08	35759908.46	58160390.58	72342769.37	51825338.85	95365910.55	41603769.45	62532302.29	65109903.33	60851886.17	74515501.6	53855349.34	58806525	61769047.79	61589646.76	53546173.9	55537052.57	52743520.78	60672658.68	62668818.78
SUPV3L1	Q8IYB8	ATP-dependent RNA helicase SUPV3L1, mitochondrial OS=Homo sapiens GN=SUPV3L1 PE=1 SV=1	1	8	2	6	6.36931	19711300	16028000	20824200	24016400	17237600	15839800	13705900	23511400	28845300	24772100	40622800	18904300	34361300	24217400	29292400	35341900	TRUE	18881171.89	16732685.78	19947202.86	25072303.14	16511650.1	16536211.39	13128685.26	24545100.35	27630499.64	25861228.19	38911998.17	19735444.96	32914197.02	25282140.29	28058770.33	36895739.18	18943588.77	21101290.04	22614085.53	25873765.48	20926791.35	13405724.67	19363950.13	25605338.63	23935644.02
WDR75	Q8IWA0	WD repeat-containing protein 75 OS=Homo sapiens GN=WDR75 PE=1 SV=1	1	8	2	2	6.37745	6695460	5745410	8143080	11162900	6460740	6646740	5471810	8617560	7498040	7996570	15367900	6431750	9652540	6769390	8586370	12318800	TRUE	6630683.468	5801538.111	8064298.186	11271952.7	6398234.312	6711673.392	5418871.908	8701746.744	7425498.751	8074690.163	15219220.26	6494583.109	9559154.621	6835521.585	8503299.491	12439144.93	6652603.004	7316215.698	9142471.264	11632272.44	8109093.499	5441079.789	7992480.837	9077623.187	6432532.783
LMAN1	P49257	Protein ERGIC-53 OS=Homo sapiens GN=LMAN1 PE=1 SV=2	1	8	2	4	6.75728	24528400	15271500	27780400	29049300	17680700	30993700	22045200	29435400	28539900	20229000	46299000	15303200	17563600	18096700	28981000	25189100	TRUE	22841075.48	16399641.99	25869368.29	31195240.82	16464433.2	33283278.27	20528696.42	31609862.94	26576621.8	21723364.3	43114061.81	16433683.75	16355388.58	19433546.23	26987378.24	27049878.67	22916582.9	20681294.5	29328027.16	32192429.26	20866948.86	26982387.57	30278481.48	32975267.29	23022694.73
LMNB2	J9JID7|Q03252	Lamin B2, isoform CRA_a OS=Homo sapiens GN=LMNB2 PE=1 SV=1|Lamin-B2 OS=Homo sapiens GN=LMNB2 PE=1 SV=4	1	8	2	9	7.21571	48712700	31227100	50821300	64340800	31975100	68846100	35085600	46191100	45084100	43878400	93645300	37015800	38549200	38819600	56841900	60509500	TRUE	48552750.46	31329972.86	50654426.81	64552760.84	31870108.84	69072902.85	34970395.43	46343269.45	44936065.07	44022950.62	93337812.98	37137742.84	38422622.6	38947485.18	56655257.99	60708839.21	48713254.84	39509667.08	57426775.5	66616257.23	40392033.15	55996642.52	51579040.81	48345090.9	38927043.34
TNPO2	O14787-2	Isoform 2 of Transportin-2 OS=Homo sapiens GN=TNPO2	1	8	2	3	6.6236	26692900	20245100	21422800	19685700	21776000	28792600	19399800	20064800	31994200	24729500	28916200	12625100	27729900	33394000	22623400	23656900	TRUE	25226925.13	21421573.46	20246259.18	20829665.88	20580061.42	30465781.64	18334362.4	21230795.95	30237077.57	26166568.74	27328121.43	13358763.7	26206973.06	35334575.98	21380922.19	25031638.33	25310319.62	27014362.23	22953124.81	21495507.89	26083077.64	24698274.05	27041982.65	22147871.15	26193660.42
MRPL20	Q9BYC9	39S ribosomal protein L20, mitochondrial OS=Homo sapiens GN=MRPL20 PE=1 SV=1	1	8	2	2	6.06068	7863130	5439120	7244530	9311660	5760130	8217700	6045430	8044840	6592470	7424380	13060200	6970390	7855930	7325600	8550020	10886200	TRUE	7955133.596	5376214.884	7329295.585	9203967.753	5827527.166	8122659.741	6116165.356	7951798.921	6669606.07	7338514.734	13213012.6	6889775.27	7947849.352	7240877.156	8650060.644	10760297.71	7981431.465	6779848.203	8309200.965	9498182.191	7385781.819	6584950.901	9020942.962	8295280.981	5777720.95
LGMN	G3V2T4|G3V4E4|Q99538|Q99538-2|Q99538-3	Legumain (Fragment) OS=Homo sapiens GN=LGMN PE=1 SV=1|Legumain OS=Homo sapiens GN=LGMN PE=1 SV=1|Legumain OS=Homo sapiens GN=LGMN PE=1 SV=1|Isoform 2 of Legumain OS=Homo sapiens GN=LGMN|Isoform 3 of Legumain OS=Homo sapiens GN=LGMN	1	8	2	2	6.64073	12226800	10262000	14280200	14564100	8178290	15701100	8664940	10789900	15763300	12794400	24463400	9735930	13265400	11953100	16635200	18295000	TRUE	11907776.73	10536930.99	13907599.15	14954289.28	7964900.985	16121750.84	8438853.249	11078974.04	15352001.91	13137176.94	23825097.76	9996766.954	12919277.44	12273337.53	16201152.18	18785144.45	11947141.14	13287934.75	15767004.47	15432318.75	10094679.82	13069726.06	12446755.34	11557536.05	13299073.76
RIF1	Q5UIP0|Q5UIP0-2	Telomere-associated protein RIF1 OS=Homo sapiens GN=RIF1 PE=1 SV=2|Isoform 2 of Telomere-associated protein RIF1 OS=Homo sapiens GN=RIF1	1	8	2	4	6.20251	10911300	11353300	11954600	16569300	12206900	12109000	9125240	15889600	16078700	20552000	22498400	11774000	17318100	13026500	14573600	21852500	TRUE	11350185.87	10914293.71	12435450.59	15928602.86	12697898.87	11640772.51	9492285.073	15275185.31	16725434.51	19757300.91	23403354.49	11318726.2	18014686.97	12522794.87	15159794.78	21007513.53	11387707.01	13763820.12	14098033.96	16437777.28	16093260.13	9437046.225	14000498.23	15935004.83	14488845.72
ALDOA	P04075	Fructose-bisphosphate aldolase A OS=Homo sapiens GN=ALDOA PE=1 SV=2	1	8	2	15	7.71025	154070000	108523000	106325000	78511600	125722000	205897000	94035800	119530000	143506000	129181000	137684000	61427600	153118000	160844000	104143000	102522000	TRUE	146562970.9	114081602.6	101144336.2	82533003.63	119596221.4	216443147.9	89453924.99	125652386.7	136513699.7	135797715.8	130975375.4	64573952.56	145657356.9	169082510.5	99068653.75	107773228.4	147047474.9	143866263.8	114667038.1	85171257.25	151575715.1	175468079	131938675.3	131080006.4	118258567.9
PRKDC	P78527|P78527-2	DNA-dependent protein kinase catalytic subunit OS=Homo sapiens GN=PRKDC PE=1 SV=3|Isoform 2 of DNA-dependent protein kinase catalytic subunit OS=Homo sapiens GN=PRKDC	1	8	2	35	7.19228	198825000	183429000	174575000	247840000	180150000	198740000	137014000	226266000	205555000	230112000	308542000	167471000	285189000	207861000	218447000	327776000	TRUE	204636672.4	178219624.6	179677842.7	240801355	185415800.5	193095792.9	141018931.4	219840055.7	211563390.9	223576829.4	317560710	162714831.1	293525099.8	201957756.9	224832225.2	318467176.2	205313154.8	224749573.3	203700244.7	248498821.7	234995154.7	156540635.2	207993679.4	229336160.4	183272328.7
IMPDH2	H0Y4R1|P12268	Inosine-5'-monophosphate dehydrogenase 2 (Fragment) OS=Homo sapiens GN=IMPDH2 PE=1 SV=1|Inosine-5'-monophosphate dehydrogenase 2 OS=Homo sapiens GN=IMPDH2 PE=1 SV=2	1	8	2	7	6.96217	42251800	23599300	30287000	19413700	31816400	53610800	25466600	27589400	56224300	47294900	45614400	16936600	43277400	52937400	36674000	30227300	TRUE	38276739.52	26050100.3	27437591.06	21429823.44	28823104.7	59178311.11	23070695.56	30454574.39	50934703.04	52206501.41	41322985.22	18695475.24	39205850.8	58434978.15	33223700.41	33366421.75	38403273.74	32851314.45	31105916.72	22114850.12	36530273.75	47975205.84	34027763.58	31770075.45	44123520.6
APEH	C9JIF9|P13798	Acylamino-acid-releasing enzyme OS=Homo sapiens GN=APEH PE=1 SV=1|Acylamino-acid-releasing enzyme OS=Homo sapiens GN=APEH PE=1 SV=4	1	8	2	2	6.39174	17188000	7845850	10010300	6388760	8358230	20077000	9358090	8781590	16030900	14816700	15399900	4951960	13853000	17228400	10680400	8306600	TRUE	15487162.76	8707500.007	9019731.518	7090388.899	7531141.981	22281904.14	8432060.91	9746005.211	14444563.5	16443905.42	13876004.06	5495796.087	12482177.43	19120464.08	9623521.823	9218850.673	15538359.8	10980872.15	10225643.24	7317040.582	9544935.601	18063694.58	12436737.09	10166988.94	12512981.47
ITGB3	P05106	Integrin beta-3 OS=Homo sapiens GN=ITGB3 PE=1 SV=2	1	8	2	2	6.37923	5988810	5593890	6421210	10173200	6453870	8831170	4597440	8285310	6817140	8495960	11355800	6563120	8240120	5502250	9031070	11418600	TRUE	6294732.684	5322028.123	6749220.707	9678784.62	6783549.057	8401976.996	4832288.19	7882645.677	7165375.754	8083058.131	11935881.32	6244153.749	8661044.963	5234841.807	9492398.574	10863658.44	6315541.643	6711514.249	7651571.772	9988177.074	8597439.68	6811390.327	7127308.304	8223140.627	6207194.424
GTF2I	P78347|P78347-2|P78347-3|P78347-4	General transcription factor II-I OS=Homo sapiens GN=GTF2I PE=1 SV=2|Isoform 2 of General transcription factor II-I OS=Homo sapiens GN=GTF2I|Isoform 3 of General transcription factor II-I OS=Homo sapiens GN=GTF2I|Isoform 4 of General transcription factor II-I OS=Homo sapiens GN=GTF2I	1	8	2	5	6.45876	19071200	18365700	20042200	27859800	17488900	20500900	12913900	23156300	23634400	24431300	38586900	18492400	30352300	22964600	27801800	36824400	TRUE	19473818.84	17985991.39	20465317.96	27283802.02	17858114.34	20077046.39	13186529.9	22677546.31	24133354.16	23926185.84	39401521.67	18110071.88	30993078.12	22489809.69	28388733.61	36063060.01	19538194.87	22681811.28	23201471.11	28155957.24	22633294.1	16276240.65	19449267.18	23657114.64	20906150.15
CAD	F8VPD4|P27708	CAD protein OS=Homo sapiens GN=CAD PE=1 SV=1|CAD protein OS=Homo sapiens GN=CAD PE=1 SV=3	1	8	2	16	7.03955	106476000	74982800	62858600	57815200	78100900	116128000	60706800	66974400	114406000	90951600	102294000	39930000	118797000	124893000	76235800	86263600	TRUE	100426586.6	79499551.71	59287300.76	61297824.06	73663612.42	123123222.1	57257754.86	71008748.35	107906045.2	96430267.04	96482186.1	42335270.22	112047571.3	132416200.9	71904477.72	91459875.18	100758574.1	100255459.3	67213839.44	63257273	93360932.31	99814641.8	84451434.95	74076007.9	93476437.92
HNRNPA2B1	P22626	Heterogeneous nuclear ribonucleoproteins A2/B1 OS=Homo sapiens GN=HNRNPA2B1 PE=1 SV=2	1	8	2	4	7.47901	30664600	29553200	38260000	47601600	30368800	40696000	25125800	42517900	33589100	41401900	60604100	29115000	40170300	34410300	40199900	58216800	TRUE	32019626.06	28302549.66	39950656.23	45587166.46	31710755.07	38973801.85	26236074.19	40718601.58	35073355.65	39649829.15	63282110.96	27882893.67	41945369.74	32954103.94	41976277.72	55753145.95	32125475.69	35691837.95	45291942.11	47044407.83	40190068.89	31595632.44	38696489.55	42477462.6	30383212.98
RPS12	P25398	40S ribosomal protein S12 OS=Homo sapiens GN=RPS12 PE=1 SV=3	1	8	2	3	6.42119	24828800	19323200	17301000	18304800	17856900	26937000	13040900	17892300	28912800	22500100	34717100	15199200	34338300	35754800	29590600	29596400	TRUE	24060321.49	19940376.46	16765515.13	18889449.11	17304209.42	27797358.65	12637269.88	18463774	28017917.22	23218745.57	33642567.79	15684657.3	33275492.06	36896796.19	28674738.57	30541698.98	24139859.45	25146451.25	19007015.46	19493270.07	21931277.48	22535012.88	18639144.66	19261326.25	24271254.64
HMGCL	P35914	Hydroxymethylglutaryl-CoA lyase, mitochondrial OS=Homo sapiens GN=HMGCL PE=1 SV=2	1	8	2	3	7.25036	20979300	16893000	25004100	27435000	16040500	29422000	21347900	26946400	26644900	19906800	42661600	15917900	24381300	25628900	25361400	30682200	TRUE	20562124.27	17235734.51	24506890.68	27991616.42	15721532.86	30018929.78	20923394.62	27493103.44	26115063.18	20310680.15	41813269.31	16240851.14	23896475.12	26148873.27	24857085.72	31304697.41	20630097.99	21735675.78	27783390.27	28886397.66	19925400.31	24336016.15	30860635.46	28680682.23	22622857.49
DDB1	Q16531	DNA damage-binding protein 1 OS=Homo sapiens GN=DDB1 PE=1 SV=1	1	8	2	25	7.68008	168618000	136441000	146847000	141199000	138491000	199539000	122689000	150973000	205737000	157386000	260415000	97072200	225653000	208025000	198940000	203775000	TRUE	158497442	145153185.1	138033151.1	150214998.3	130178683.4	212280190	115325129.4	160613098.8	193388536.4	167435589	244784728.5	103270564	212109165.6	221308047.7	186999496.6	216786671.9	159021398.6	183050079.4	156487779.6	155016777.6	164987880.1	172093214.9	170097005.8	167550864.5	167527884.9
PGM2	Q96G03	Phosphoglucomutase-2 OS=Homo sapiens GN=PGM2 PE=1 SV=4	1	8	2	5	6.75928	30953700	18698000	20341700	16023100	20828500	37614900	18969000	20036900	34682500	26030400	29437400	12373200	25491800	36529300	20529400	18669200	TRUE	29104131.62	19886258.43	19126227.69	17041368.46	19583940.06	40005327.95	17835550.28	21310245.56	32610125.6	27684632.65	27678434.7	13159517.21	23968595.11	38850738.04	19302712.1	19855628.19	29200343.28	25078203.97	21683348.39	17586113.59	24820597.88	32431879.3	26306267.47	22230752.62	28249375.43
ALDH18A1	P54886|P54886-2	Delta-1-pyrroline-5-carboxylate synthase OS=Homo sapiens GN=ALDH18A1 PE=1 SV=2|Isoform Short of Delta-1-pyrroline-5-carboxylate synthase OS=Homo sapiens GN=ALDH18A1	1	8	2	8	7.13756	28930500	26900700	35047200	45128900	27309100	36155700	25034800	37541700	34584800	39945000	59059700	27954500	36530400	31999300	39204300	56391900	TRUE	29836001.88	26084282.49	36144149.78	43759269.31	28163853.34	35058399.68	25818369.54	36402335.55	35667277.02	38732697.07	60908222.13	27106100.39	37673772.77	31028143.53	40431363.73	54680445.11	29934632.94	32894420.99	40976516.87	45158080.04	35694741.52	28421458.97	38080402.57	37974753.23	30897712.92
OTUB1	F5GYJ8|F5GYN4|J3KR44|Q96FW1	Ubiquitin thioesterase OTUB1 OS=Homo sapiens GN=OTUB1 PE=1 SV=1|Ubiquitin thioesterase OTUB1 OS=Homo sapiens GN=OTUB1 PE=1 SV=1|Ubiquitin thioesterase OTUB1 OS=Homo sapiens GN=OTUB1 PE=1 SV=2|Ubiquitin thioesterase OTUB1 OS=Homo sapiens GN=OTUB1 PE=1 SV=2	1	8	2	4	6.45124	14738200	9284450	8350190	7333860	8575800	16268200	6803710	7808940	17202800	11316500	15152200	4823650	14178700	16488700	11164400	11096300	TRUE	13645588.18	10027862.43	7731151.289	7921087.319	7940035.762	17570806.2	6299319.097	8434207.308	15927475.83	12222620.1	14028896.42	5209883.042	13127566.53	17808961.78	10336730.71	11984788.53	13690697.4	12645957.53	8764783.601	8174293.144	10063165.75	14244459.3	9291082.724	8798527.247	13797593.11
PECR	Q9BY49	Peroxisomal trans-2-enoyl-CoA reductase OS=Homo sapiens GN=PECR PE=1 SV=2	1	8	2	2	6.58901	16991000	10782900	16567900	16762000	13744900	21527500	16451600	24943000	15815300	19532000	28210900	11310600	15293800	16322500	16940000	22150700	TRUE	17046476.31	10747807.97	16621994.87	16707449.49	13789777.66	21457440.57	16505315.15	24861825.12	15866937.6	19468434.76	28303009.75	11273790.61	15343734.89	16269379.81	16995309.8	22078612.42	17102828.1	13553867.93	18844306.97	17241520.56	17477102.42	17395311.04	24344257.86	25935744.49	13745150.29
CDK6	Q00534	Cyclin-dependent kinase 6 OS=Homo sapiens GN=CDK6 PE=1 SV=1	1	8	2	2	6.41878	20309800	12981800	11943400	10262900	17479700	24857000	11796400	15760900	20533400	19078800	18344200	8819260	20224400	21863800	13975600	14714200	TRUE	19521041.47	13506336.84	11479561.92	10677578.18	16800852.23	25861360.9	11338270.86	16397727.92	19735957.66	19849689.52	17631778.2	9175607.102	19438958.09	22747218.99	13432838.69	15308735.43	19585573.61	17032599.24	13014345.77	11018898.11	21293324.84	20965520.8	16723206.26	17106036.25	17096790.25
ANK2	E9PCH6|H0Y931|I6L894|Q01484|Q01484-2|Q01484-5|Q01484-7	Ankyrin-2 OS=Homo sapiens GN=ANK2 PE=1 SV=1|Ankyrin-2 (Fragment) OS=Homo sapiens GN=ANK2 PE=1 SV=1|Ankyrin-2 OS=Homo sapiens GN=ANK2 PE=1 SV=1|Ankyrin-2 OS=Homo sapiens GN=ANK2 PE=1 SV=4|Isoform 2 of Ankyrin-2 OS=Homo sapiens GN=ANK2|Isoform 4 of Ankyrin-2 OS=Homo sapiens GN=ANK2|Isoform 5 of Ankyrin-2 OS=Homo sapiens GN=ANK2	1	8	2	2	6.35352	9733000	5639230	9837370	7927980	6774380	14597800	7522680	6864990	11422900	6116160	13306200	7023680	8111020	10684500	9831060	9479760	TRUE	9080790.151	6044256.576	9178166.301	8497391.533	6320427.739	15646258.2	7018584.039	7358054.372	10657449.69	6555441.133	12414549.46	7528141.968	7567499.284	11451893.15	9172279.135	10160625.07	9110809.184	7622303.604	10405260.29	8769019.524	8010481.796	12684249.41	10351951.36	7675889.329	9232294.935
NCBP1	Q09161	Nuclear cap-binding protein subunit 1 OS=Homo sapiens GN=NCBP1 PE=1 SV=1	1	8	2	7	6.73437	39884000	39598800	34880400	46925300	36312900	42701900	29555100	40875400	49611300	49559500	57777100	29921700	53665400	39472400	43641200	53825300	TRUE	39932188.84	39551013.48	34922543.36	46868672.11	36356774.15	42650368.77	29590809.21	40826072.93	49671241.6	49499693.24	57846907.73	29885591.49	53730239.87	39424766.02	43693928.38	53760345.42	40064195.6	49877074.01	39591585.26	48366878.14	46078412.65	34576184.79	43644503.79	42589576.22	43029014.04
DNAJC13	O75165	DnaJ homolog subfamily C member 13 OS=Homo sapiens GN=DNAJC13 PE=1 SV=5	1	8	2	2	5.85843	3393690	2732300	2678620	4059390	3359120	3881220	2768630	3731680	4426920	5132890	5470620	3071470	4186750	3938110	3782800	4984600	TRUE	3485549.742	2660291.74	2751124.366	3952407.014	3450044.008	3778932.586	2843570.739	3633333.631	4546747.011	4997615.513	5618697.68	2990523.101	4300076.136	3834323.282	3885192.096	4853233.615	3497072.179	3354846.218	3118941.646	4078749.83	4372570.317	3063539.078	4194080.434	3790277.353	3938738.688
EIF2S3|EIF2S3L	P41091|Q2VIR3	Eukaryotic translation initiation factor 2 subunit 3 OS=Homo sapiens GN=EIF2S3 PE=1 SV=3|Putative eukaryotic translation initiation factor 2 subunit 3-like protein OS=Homo sapiens GN=EIF2S3L PE=5 SV=2	1	8	2	3	6.08277	14435800	12172300	11558400	10645800	10495400	20185000	12817300	11397300	16129700	25458700	21091500	8322370	17443400	19921700	16098100	17268900	TRUE	14447817.73	12162175.05	11568022.31	10636944.8	10504137.36	20168210.07	12827970.33	11387819.7	16143127.89	25437523.4	21109058.56	8315447.434	17457921.54	19905129.09	16111501.58	17254535.69	14495578.94	15337500.91	13114633.05	10976965.84	13312896.63	16350146.05	18920415.32	11879722.45	13984407.36
RPL23	P62829	60S ribosomal protein L23 OS=Homo sapiens GN=RPL23 PE=1 SV=1	1	8	2	2	7.18904	14390300	10985300	12101200	9666090	11108500	16603700	10036800	11919200	14648600	11752600	18619700	7231290	19829800	16891700	13837000	15254400	TRUE	13392473.02	11803776.82	11262099.78	10386277.03	10338233.85	17840784.43	9340845.791	12807258.49	13632862.43	12628245.7	17328605.37	7770068.482	18454796.73	18150242.32	12877538.98	16390952.74	13436745.5	14885531.32	12767809.58	10718285.22	13102631.25	14463327.69	13777135.21	13360474.63	11809824.16
RAB1A	P62820	Ras-related protein Rab-1A OS=Homo sapiens GN=RAB1A PE=1 SV=3	1	8	2	4	6.60852	33916700	31833000	31340100	42201700	30797100	45673200	25260200	35002100	38984600	41739300	55151900	26029900	40297300	37758100	33928200	42256700	TRUE	34832493.14	30996067.58	32186321.73	41092160.49	31628660.05	44472390.09	25942256.86	34081847.67	40037232.75	40641917.61	56641069.98	25345538.89	41385377.28	36765388.72	34844303.65	41145714.47	34947641.46	39088585.1	36489538.79	42405714.3	40086022.03	36053277.43	38263128.25	35554030.68	34683301.53
RAN	B5MDF5|P62826	GTP-binding nuclear protein Ran OS=Homo sapiens GN=RAN PE=1 SV=1|GTP-binding nuclear protein Ran OS=Homo sapiens GN=RAN PE=1 SV=3	1	8	2	7	7.60395	63960000	44234800	52012500	42011100	43413200	80058700	36958700	44987700	67015000	51617000	72214500	30926900	67729200	73374500	51317000	50658100	TRUE	60781132.66	46548290.31	49427433.74	44208290.28	41255526.39	84245788.59	35121820.63	47340567.15	63684296.51	54316581.08	68625376.86	32544384.05	64363000.15	77212003.38	48766500.7	53307530.39	60982061.3	58701214.36	56035737.05	45621454.43	52287069.3	68297134.09	51802383.06	49385467.39	55168189.89
PPP4R3A	G3V5Z3|Q6IN85|Q6IN85-2	Serine/threonine-protein phosphatase 4 regulatory subunit 3A OS=Homo sapiens GN=PPP4R3A PE=1 SV=1|Serine/threonine-protein phosphatase 4 regulatory subunit 3A OS=Homo sapiens GN=PPP4R3A PE=1 SV=1|Isoform 2 of Serine/threonine-protein phosphatase 4 regulatory subunit 3A OS=Homo sapiens GN=PPP4R3A	1	8	2	7	6.82738	43094700	35431800	27786800	33463400	32820200	47470600	26035400	30115500	50972700	41772500	49726200	23283300	52260500	50595800	38555700	46133100	TRUE	42278231.73	36116051.43	27260353.81	34109638.11	32198391.47	48387342.19	25542135.68	30697084.17	50006975.86	42579201.69	48784091.93	23732942.17	51270377.31	51572895.39	37825227.21	47024012.67	42417993.98	45545304.95	30904983.37	35199988.3	40808097.08	39227086.04	37672975.74	32023060.57	43319852.63
FARSB	Q9NSD9|Q9NSD9-2	Phenylalanine--tRNA ligase beta subunit OS=Homo sapiens GN=FARSB PE=1 SV=3|Isoform 2 of Phenylalanine--tRNA ligase beta subunit OS=Homo sapiens GN=FARSB	1	8	2	3	6.36311	12004000	7306300	8488250	6100070	8835490	18231500	7563660	8823470	13208700	9283700	13344500	4814840	13145300	13997200	10476600	8982840	TRUE	10990386.86	7980139.944	7771505.439	6662662.67	8089424.627	19912941.08	6924987.462	9637234.358	12093362.46	10139910.1	12217695.56	5258899.444	12035315.93	15288123.24	9591959.931	9811302.614	11026718.59	10063611.41	8810532.983	6875641.638	10252500.53	16143202.28	10213902.55	10053519.67	10476191.98
TPP2	P29144	Tripeptidyl-peptidase 2 OS=Homo sapiens GN=TPP2 PE=1 SV=4	1	8	2	30	7.45843	137825000	129392000	110222000	161242000	128529000	158471000	90066800	145408000	151813000	154098000	201920000	108766000	204141000	152521000	148506000	219583000	TRUE	142213752.8	125398929.8	113731792.2	156266030.7	132621740.8	153580544.4	92934791.42	140920671.9	156647171.8	149342496.3	208349725.8	105409453.4	210641449	147814162.9	153234867.2	212806612.5	142683879.2	158138342.2	128937400.1	161261237.5	168084200.1	124506057.9	137072725.1	147007813.1	135699715.5
STRBP	Q96SI9|Q96SI9-2	Spermatid perinuclear RNA-binding protein OS=Homo sapiens GN=STRBP PE=1 SV=1|Isoform 2 of Spermatid perinuclear RNA-binding protein OS=Homo sapiens GN=STRBP	1	8	2	2	6.33537	20553900	18763700	19454100	27363000	16871100	23914000	15626200	25035100	21216500	22026700	35445100	20431300	23364400	20904600	24002900	29409100	TRUE	21404280.53	18018228.31	20258978.29	26275882.75	17569111.33	22963909.66	16272705.84	24040468.96	22094294.41	21151591.08	36911577.07	19619575.46	24331059.9	20074071.5	24995976.69	28240692.3	21475038.23	22722464.68	22967544.43	27115818.77	22267012.98	18616588.96	24001174.37	25078909.43	19139761.23
RAB3GAP2	Q9H2M9	Rab3 GTPase-activating protein non-catalytic subunit OS=Homo sapiens GN=RAB3GAP2 PE=1 SV=1	1	8	2	9	6.45073	40024600	31195600	28007500	27406500	30223000	38236800	24712900	31108300	46874100	38751100	46104900	19135000	47587700	47958900	35365700	36711900	TRUE	38000919.54	32856873.65	26591415.13	28865990.96	28694897.42	40273041.91	23463393.13	32764924.62	44504102.54	40814730.17	43773794	20154004.96	45181622.27	50512877.38	33577577.79	38666935.71	38126541.96	41435214.28	30146609.55	29788722.5	36367784.42	32648912.06	34606966.74	34180222.45	38552844.49
HEXB	P07686	Beta-hexosaminidase subunit beta OS=Homo sapiens GN=HEXB PE=1 SV=3	1	8	2	3	6.71905	17703700	11707700	17598400	16005100	11514000	21973900	13640000	14268900	23557500	15184200	30430200	10065700	15608900	19900100	21207100	20122900	TRUE	16453111.36	12597593.48	16355249.75	17221635.63	10700651.52	23644119.63	12676470.96	15353468.37	21893399.17	16338339.64	28280611.93	10830786.3	14506287.95	21412691.65	19709031.33	21652426.51	16507501.62	15886599.29	18541898.8	17772143.19	13561957.78	19168027.7	18696963.68	16016669.36	18965730.47
PDPR	A8MT40|Q8NCN5	Pyruvate dehydrogenase phosphatase regulatory subunit, mitochondrial OS=Homo sapiens GN=PDPR PE=1 SV=2|Pyruvate dehydrogenase phosphatase regulatory subunit, mitochondrial OS=Homo sapiens GN=PDPR PE=1 SV=2	1	8	2	2	6.04221	4495900	3919320	5157680	4932750	3595620	5311170	3118320	3971400	5774500	6635420	8452210	3533820	5657250	5913110	6811640	8367640	TRUE	4486630.268	3927417.625	5147045.797	4942941.451	3588206.482	5322143.297	3111890.588	3979605.226	5762594.026	6649129.302	8434783.072	3541121.151	5645585.774	5925326.952	6797595.631	8384928.205	4501462.05	4952795.953	5835190.764	5100947.735	4547676.818	4314603.026	4589834.621	4151506.328	4991998.01
HIP1	O00291|O00291-3|O00291-4	Huntingtin-interacting protein 1 OS=Homo sapiens GN=HIP1 PE=1 SV=5|Isoform 3 of Huntingtin-interacting protein 1 OS=Homo sapiens GN=HIP1|Isoform 4 of Huntingtin-interacting protein 1 OS=Homo sapiens GN=HIP1	1	8	2	5	6.65606	18591300	16201500	19136600	24707900	16744300	25193700	13719600	17878100	22315200	23714800	37555500	17042500	23695100	21348300	23685100	29387400	TRUE	18793835.3	16026901.49	19345075.85	24441630.67	16926713.91	24922195.36	13869062.56	17685433.3	22558303.8	23459233	37964633	16858838.3	23953236.56	21118236.03	23943127.62	29070701.16	18855963.46	20211238.13	21931455.9	25222932.91	21452841.37	20204149.63	20455958.1	18449364.72	19541721.52
OGDHL	Q9ULD0	2-oxoglutarate dehydrogenase-like, mitochondrial OS=Homo sapiens GN=OGDHL PE=1 SV=3	1	8	2	2	6.32281	20346600	16824800	20371800	22008100	16616300	20842700	16754800	20598200	22379300	20189700	34986400	17176200	21877100	20230300	25048000	26151200	TRUE	19684620.6	17390605.72	19709000.72	22748216.31	16075686.42	21543624.76	16209680.3	21290902.41	21651186.43	20868664.85	33848112.72	17753823.05	21165325.58	20910630.2	24233059.91	27030645.74	19749693.49	21930981.09	22344036.46	23475386.79	20374252.94	17465179.61	23908215.84	22210573.93	18755907.34
RAE1	E9PQ57|P78406	mRNA export factor OS=Homo sapiens GN=RAE1 PE=1 SV=1|mRNA export factor OS=Homo sapiens GN=RAE1 PE=1 SV=1	1	8	2	2	6.74091	11601100	8150190	9399170	12274400	8911480	11990700	6830760	10617900	13242900	11550600	17190600	7816980	13238500	12261200	10792000	13206400	TRUE	11494392.69	8225851.665	9312716.113	12388348.45	8829511.902	12102014.75	6767930.436	10716470.46	13121091.35	11657829.11	17032480.27	7889548.336	13116731.82	12375025.91	10692734.81	13329000.6	11532390.54	10373474.06	10557799.02	12784354.94	11190483.82	9810970.229	9982253.729	11179373.94	11366489.05
CAPN2	P17655	Calpain-2 catalytic subunit OS=Homo sapiens GN=CAPN2 PE=1 SV=6	1	8	2	7	7.18214	70469200	48240800	40518600	27464100	49568000	73915700	39486200	37745000	72965100	43867800	56574600	21437400	58250800	72322400	44161300	31299000	TRUE	62109296.73	54734005.41	35711796.79	31160764.29	43687648.22	83864743.62	34801872.48	42825472.1	64309103.08	49772400.18	49863041.14	24322871.26	51340390.15	82056985.65	38922355.95	35511841.33	62314615.98	69024072.93	40486359.56	32156850.65	55369529.61	67988225.12	51330480.52	44675340.48	55709444.94
NCAPD2	Q15021	Condensin complex subunit 1 OS=Homo sapiens GN=NCAPD2 PE=1 SV=3	1	8	2	2	6.16857	7056120	5939980	6319970	5658090	6322930	8778110	5159580	7449450	8340570	8719150	9531350	4849260	9219110	8517720	7664880	8563360	TRUE	6974083.581	6009852.218	6246492.266	5724646.335	6249417.852	8881367.253	5099593.284	7537078.173	8243600.207	8821713.704	9420535.867	4906302.036	9111926.056	8617914.275	7575765.967	8664091.14	6997138.32	7578916.884	7081630.01	5907640.631	7920484.184	7200026.735	7521565.796	7862646.156	7141234.597
MRPL49	H0YDP7|Q13405	39S ribosomal protein L49, mitochondrial (Fragment) OS=Homo sapiens GN=MRPL49 PE=1 SV=1|39S ribosomal protein L49, mitochondrial OS=Homo sapiens GN=MRPL49 PE=1 SV=1	1	8	2	2	6.1376	9636650	7671880	9788460	9953820	7579620	12026500	6408150	9571720	11504700	12233800	16073200	8099890	11441500	10322900	10299000	13377900	TRUE	9749604.719	7582996.904	9903194.14	9838499.331	7668463.514	11887166.15	6483262.283	9460826.177	11639550.82	12092064.47	16261599.89	8006048.165	11575610.03	10203303.33	10419718.37	13222909.42	9781834.702	9562781.444	11227222.23	10152997.23	9718976.297	9636794.839	9562386.864	9869491.448	10083065.76
SKP1	E5RJR5|P63208	S-phase kinase-associated protein 1 OS=Homo sapiens GN=SKP1 PE=1 SV=1|S-phase kinase-associated protein 1 OS=Homo sapiens GN=SKP1 PE=1 SV=2	1	8	2	5	7.04515	31272200	22101600	22858500	21211600	21816200	44856400	20700300	21731800	35066400	23281900	35318400	16346700	26854400	34016100	26993800	23977700	TRUE	29906541.93	23110851.71	21860268.5	22180210.58	20863485.78	46904731.26	19796317.17	22724165.09	33535049.08	24345049.15	33776044.23	17093158.85	25681667.41	35569417.72	25814979.8	25072622.3	30005406.17	29144680.74	24782922.45	22889224.16	26442288.39	38025149.67	29198270.1	23705747.13	29050614.62
GNA11|GNAQ	K7EL62|P29992|P50148	Guanine nucleotide-binding protein subunit alpha-11 (Fragment) OS=Homo sapiens GN=GNA11 PE=1 SV=1|Guanine nucleotide-binding protein subunit alpha-11 OS=Homo sapiens GN=GNA11 PE=1 SV=2|Guanine nucleotide-binding protein G(q) subunit alpha OS=Homo sapiens GN=GNAQ PE=1 SV=4	1	8	2	2	5.75279	4378680	3559360	4557790	6628680	3503800	4314180	3464770	5818130	5513550	6396260	9582920	4335720	6693590	6898320	7209970	9728010	TRUE	4540000.017	3432885.107	4725708.815	6393142.827	3632887.55	4160884.056	3592419.601	5611394.135	5716681.076	6168981.417	9935975.445	4181658.674	6940196.295	6653201.698	7475600.848	9382344.201	4555008.227	4329149.862	5357522.26	6597506.312	4604305.403	3373182.933	5298583.414	5853781.202	4952224.714
PSMC2	P35998	26S protease regulatory subunit 7 OS=Homo sapiens GN=PSMC2 PE=1 SV=3	1	8	2	6	6.49231	27067500	19712700	19441700	18767900	21448000	30282700	16642200	21938200	29884800	30266000	32150800	16249400	33623600	30791700	23540900	26227900	TRUE	26431039.57	20187382.56	18984551.29	19219831.74	20943675.5	31011908.56	16250878.24	22466472.68	29182094.07	30994806.42	31394811.75	16640686.16	32832980.59	31533165.3	22987363.42	26859468.82	26518414.59	25457946.22	21522730.26	19834213.73	26543920.49	25141013.13	23968980.09	23436923.57	25279753.33
TIAL1	Q01085|Q01085-2	Nucleolysin TIAR OS=Homo sapiens GN=TIAL1 PE=1 SV=1|Isoform 2 of Nucleolysin TIAR OS=Homo sapiens GN=TIAL1	1	8	2	2	6.24872	5152520	3881080	4446930	5330300	3144060	6739680	2745910	3764950	4355710	4583680	6676020	3543220	5397680	5292020	5126710	6603880	TRUE	5358407.031	3731956.57	4624622.705	5125492.931	3269691.958	6480720.071	2855632.477	3620288.653	4529757.689	4407560.444	6942783.824	3407078.225	5613363.26	5088683.77	5331565.702	6350137.939	5376120.71	4706303.521	5242921.232	5289334.663	4143992.938	5253848.472	4211870.706	3776668.891	3924021.243
PPP1R9B	D3DTX6|Q96SB3	Neurabin-2 OS=Homo sapiens GN=PPP1R9B PE=1 SV=1|Neurabin-2 OS=Homo sapiens GN=PPP1R9B PE=1 SV=2	1	8	2	5	6.53412	19867200	18639000	23081500	26224100	17682400	24198600	17560800	21151600	27694300	27624600	37754200	17702800	25961900	22095500	25908400	31374700	TRUE	19662007.54	18833516.37	22843109.6	26497774.38	17499772.59	24451136.28	17379428.5	21372337.83	27408267.67	27912889.98	37364266.98	17887546.2	25693760.24	22326088.36	25640812.8	31702125.97	19727005.68	23750609.83	25897166.53	27344803.4	22179133.38	19822267.22	25633517.76	22295527	23743129.75
GFAP	P14136|P14136-2|P14136-3	Glial fibrillary acidic protein OS=Homo sapiens GN=GFAP PE=1 SV=1|Isoform 2 of Glial fibrillary acidic protein OS=Homo sapiens GN=GFAP|Isoform 3 of Glial fibrillary acidic protein OS=Homo sapiens GN=GFAP	1	8	2	9	7.38836	43283000	34002800	41674000	56904000	29168000	54110000	33133400	36568600	44153700	39962900	78088700	35217100	38047700	39103100	46150300	51264300	TRUE	43345750.29	33953575.2	41734417.62	56821621.85	29210286.82	54031666.64	33181435.73	36515660.77	44217712.61	39905046.95	78201910.47	35166117.3	38102860.33	39046491.66	46217207.21	51190086.27	43489041.52	42818244.95	47314187.17	58637984.31	37020986.64	43802877.78	48940442.53	38092973.59	38304751.71
ERP29	P30040	Endoplasmic reticulum resident protein 29 OS=Homo sapiens GN=ERP29 PE=1 SV=4	1	8	2	5	6.97797	27085900	17201300	32009400	35960500	18225300	31832000	15728000	28121800	27195300	60891100	63954300	19031500	26792200	30211600	31476700	36616500	TRUE	28237962.01	16499515.49	33370876.4	34493371.25	19000488.41	30533307.2	16396969.14	26974477.21	28352015.19	58406844.12	66674509.39	18255046.37	27931769.88	28979016.83	32815518.73	35122607.54	28331310.31	20807243.18	37832464.96	35595987.87	24081133.88	24753016.27	24184454.6	28139653.68	24560675.76
BLVRB	P30043	Flavin reductase (NADPH) OS=Homo sapiens GN=BLVRB PE=1 SV=3	1	8	2	2	6.43839	6533210	4063550	5779640	4642560	5137710	7144170	4130770	5225870	7249280	5623840	7082730	3498740	6084170	6509330	5427720	6279560	TRUE	6185562.501	4291933.918	5472091.736	4903486.047	4864320.344	7545694.168	3910961.994	5519579.851	6863528.729	5939916.98	6705841.247	3695379.871	5760416.977	6875174.221	5138898.229	6632490.446	6206010.568	5412480.915	6203694.394	5060231.098	6165017.809	6117211.257	5768412.563	5758000.952	5945711.532
DYNC1H1	Q14204	Cytoplasmic dynein 1 heavy chain 1 OS=Homo sapiens GN=DYNC1H1 PE=1 SV=5	1	8	2	19	6.97197	122380000	85472000	90141600	87202400	93693400	135094000	82851900	92965300	119823000	116064000	149007000	62033500	125983000	134416000	102127000	114467000	TRUE	117579148.1	88961891.05	86605430.08	90762944.68	90017896.32	140609997.5	79601698.13	96761148.56	115122456.8	120802987.2	143161596	64566378.09	121040805.8	139904314.2	98120654.15	119140780.4	117967838.1	112188245.8	98184322.75	93664276.96	114088278.5	113990978.3	117407286.5	100940796.3	99727843.48
DDX5	J3KTA4|P17844|P17844-2	Probable ATP-dependent RNA helicase DDX5 OS=Homo sapiens GN=DDX5 PE=1 SV=1|Probable ATP-dependent RNA helicase DDX5 OS=Homo sapiens GN=DDX5 PE=1 SV=1|Isoform 2 of Probable ATP-dependent RNA helicase DDX5 OS=Homo sapiens GN=DDX5	1	8	2	7	7.09345	54557200	50923800	63905200	80625400	56780500	62852700	47217900	77319300	66764900	79027600	105304000	56639500	81695900	66171500	74738300	118703000	TRUE	56495631.57	49176544.52	66175768.45	77859047.69	58797926	60696149.93	48895564.32	74666383.87	69137074.34	76316070.09	109045478.6	54696132.13	84598576.67	63901078	77393771.33	114630160.4	56682393.32	62015658.64	75023275.12	80347893.43	74520227.96	49205701.08	72117752.08	77891636.87	59891801.5
HEXIM1	O94992	Protein HEXIM1 OS=Homo sapiens GN=HEXIM1 PE=1 SV=1	1	8	2	2	6.72521	7867280	6694300	5580960	5908050	6476970	8621610	5796110	7320260	8782670	6117680	11056800	4831460	8884530	8841550	8436740	9291680	TRUE	7538586.285	6986181.561	5347788.373	6165649.877	6206363.217	8997525.18	5553949.44	7639434.36	8415731.436	6384420.061	10594848.64	5042118.932	8513335.741	9227054.895	8084254.336	9696811.241	7563507.142	8810148.315	6062772.036	6362741.312	7865916.933	7294194.688	8191711.342	7969423.671	7290347.783
TRIP11	Q15643	Thyroid receptor-interacting protein 11 OS=Homo sapiens GN=TRIP11 PE=1 SV=3	1	8	2	12	6.71714	59417200	50569900	72985800	91318800	51024600	76520800	48575300	63187200	72920000	70727300	130534000	56238100	73464200	60218700	80102900	103119000	TRUE	59092379.48	50847873.94	72586802.98	91820763.54	50745659.94	76941421.51	48309749.72	63534529.04	72521362.7	71116075.65	129820399.9	56547231.04	73062587.68	60549711.71	79664995.39	103685827.2	59287725.49	64123342.19	82291446.21	94755910.1	64314822.04	62375564.05	71253713.94	66278935.82	62823529.93
TJP1	A0A087X0K9|G3V1L9|G5E9E7|Q07157|Q07157-2	Tight junction protein ZO-1 OS=Homo sapiens GN=TJP1 PE=1 SV=1|Tight junction protein 1 (Zona occludens 1), isoform CRA_a OS=Homo sapiens GN=TJP1 PE=1 SV=1|Tight junction protein 1 (Zona occludens 1), isoform CRA_e OS=Homo sapiens GN=TJP1 PE=1 SV=1|Tight junction protein ZO-1 OS=Homo sapiens GN=TJP1 PE=1 SV=3|Isoform Short of Tight junction protein ZO-1 OS=Homo sapiens GN=TJP1	1	8	2	2	6.48244	7800140	7103780	8915740	10819500	7563300	10586700	6360910	9485070	10381400	14430500	16689600	8173610	9545410	9666930	10754900	13032400	TRUE	8126610.69	6818399.533	9288903.532	10384847.75	7879857.878	10161400.03	6627142.488	9104025.864	10815907.95	13850782.89	17388134.29	7845251.205	9944928.033	9278579.994	11205040.59	12508848.82	8153475.422	8598561.407	10530802.76	10716810.25	9986896.568	8237735.229	9774600.734	9497278.962	9369563.552
COL6A1	A0A087X0S5|P12109	Collagen alpha-1(VI) chain OS=Homo sapiens GN=COL6A1 PE=1 SV=1|Collagen alpha-1(VI) chain OS=Homo sapiens GN=COL6A1 PE=1 SV=3	1	8	2	2	6.74286	11141700	4867400	12468400	7931720	5997830	16507300	9103940	7402720	12784900	7644260	21401300	5478680	7414450	11427900	12097000	7758230	TRUE	9611717.238	5642187.471	10756234.26	9194282.617	5174205.552	19134914.17	7853783.268	8581076.969	11029272.35	8861065.045	18462464.81	6350770.361	6396294.72	13246980.77	10435835.05	8993176.666	9643491.396	7115261.464	12194311.31	9488187.459	6557764.933	15512464.43	11583815.47	8951741.019	9554396.052
SNX1	H0YK42|Q13596|Q13596-2|Q13596-3	Sorting nexin-1 OS=Homo sapiens GN=SNX1 PE=1 SV=1|Sorting nexin-1 OS=Homo sapiens GN=SNX1 PE=1 SV=3|Isoform 1A of Sorting nexin-1 OS=Homo sapiens GN=SNX1|Isoform 3 of Sorting nexin-1 OS=Homo sapiens GN=SNX1	1	8	2	2	6.16677	10354200	7552230	9431790	10561400	8138490	12314800	6603830	10461400	10901400	9029070	17256400	7615130	11976900	12060000	11025900	14815400	TRUE	10333290.7	7567511.857	9412743.414	10582770.88	8122055.108	12339718.87	6590494.205	10482568.53	10879385.68	9047340.227	17221552.37	7630539.134	11952713.81	12084403.28	11003634.26	14845378.8	10367450.21	9543253.528	10671199.67	10921060.2	10293856.25	10003674.34	9720546.921	10935368.49	9424552.8
U2AF1L5|U2AF1	P0DN76|Q01081	Splicing factor U2AF 35 kDa subunit-like protein OS=Homo sapiens GN=U2AF1L5 PE=1 SV=1|Splicing factor U2AF 35 kDa subunit OS=Homo sapiens GN=U2AF1 PE=1 SV=3	1	8	2	2	7.13261	12233600	10920300	13920200	20196600	10980600	18354300	10469500	14439000	14305500	33662300	24258900	11870900	13389400	14445100	14955700	15454700	TRUE	13305254.53	10040738.55	15139599.47	18569890.96	11942492.63	16875976.63	11386620.64	13276029.41	15558651.47	30951013.56	26383962.12	10914773.7	14562301.77	13281638.09	16265808.52	14209921.17	13349238.68	12662195.37	17163719.63	19163496.91	15135861.65	13681168.62	16794519.01	13849494.35	13478089.35
RRBP1	A0A087WVV2|A0A0A0MRV0|Q9P2E9	Ribosome-binding protein 1 OS=Homo sapiens GN=RRBP1 PE=1 SV=1|Ribosome-binding protein 1 OS=Homo sapiens GN=RRBP1 PE=1 SV=1|Ribosome-binding protein 1 OS=Homo sapiens GN=RRBP1 PE=1 SV=4	1	8	2	18	7.25608	105516000	88047400	128593000	163426000	89862800	156969000	91531800	126289000	114147000	108884000	220938000	110945000	109760000	98172700	132480000	165129000	TRUE	107587346.8	86352249.89	131117363.2	160279608.4	91626864.46	153946923.1	93328628.01	123857595.9	116387778.9	106787689.1	225275154.8	108809009.3	111914659.3	96282610.53	135080667.5	161949821	107943006.2	108897274.2	148647371.1	165403113.4	116127477.5	124803077.1	137653608.3	129207688.7	100823961.9
ACAD9	Q9H845	Acyl-CoA dehydrogenase family member 9, mitochondrial OS=Homo sapiens GN=ACAD9 PE=1 SV=1	1	8	2	3	6.2528	15080900	13312400	23046300	25953600	14458900	19343800	14589900	22358000	17347100	18529200	37785600	13810000	22110100	17064300	25339800	36689500	TRUE	14970503.16	13410569.5	22877593.98	26144989.38	14353056.39	19486446.8	14483097.43	22522874.39	17220113.88	18665839.7	37508997.76	13911838.95	21948247.25	17190137.1	25154304.85	36960059.03	15019992.25	16911828.77	25936261.37	26980741.26	18190999.36	15797448.06	21361619.29	23495761.57	14917374.68
ALDH1A1	P00352	Retinal dehydrogenase 1 OS=Homo sapiens GN=ALDH1A1 PE=1 SV=2	1	8	2	19	7.88738	182123000	117067000	107249000	69167800	118142000	207532000	86268000	111355000	213590000	127019000	190421000	71223400	170219000	206960000	132550000	114397000	TRUE	165650089.5	128708612.9	97548395.57	76046123.97	107456130.6	228169816	78465113.79	122428588.7	194270919.2	139650279.8	173197540.6	78306141.09	154822798.8	227540934	120560936.1	125773097.4	166197691.1	162312124.2	110590330.7	78477017.71	136189418.4	184974759.9	115730899.2	127716954.7	168292272.1
UFD1L	C9IZG3|C9JNP9|Q92890|Q92890-1|Q92890-3	Ubiquitin fusion degradation protein 1 homolog (Fragment) OS=Homo sapiens GN=UFD1L PE=1 SV=1|Ubiquitin fusion degradation protein 1 homolog (Fragment) OS=Homo sapiens GN=UFD1L PE=1 SV=1|Ubiquitin fusion degradation protein 1 homolog OS=Homo sapiens GN=UFD1L PE=1 SV=3|Isoform Long of Ubiquitin fusion degradation protein 1 homolog OS=Homo sapiens GN=UFD1L|Isoform 3 of Ubiquitin fusion degradation p…	1	8	2	2	6.24096	14432000	11396400	9889340	10252100	9809880	18416800	9451420	11283100	17064200	15185500	18093800	8777140	15677800	18275100	14688900	15165400	TRUE	14388810.95	11430607.11	9859745.266	10282872.41	9780523.057	18472079.35	9423135.781	11316967.04	17013133.86	15231080.37	18039652.69	8803485.216	15630882.78	18329954.03	14644942.15	15210920.04	14436377.1	14414933.7	11177964.37	10611575.17	12395791.1	14975111.53	13898507.55	11805809.27	14738072.81
UGGT1	Q9NYU2|Q9NYU2-2	UDP-glucose:glycoprotein glucosyltransferase 1 OS=Homo sapiens GN=UGGT1 PE=1 SV=3|Isoform 2 of UDP-glucose:glycoprotein glucosyltransferase 1 OS=Homo sapiens GN=UGGT1	1	8	2	17	7.55136	92122400	69407800	102772000	112468000	69768500	121930000	71875700	96305300	102824000	88455900	177264000	71423700	97329200	87412900	112605000	141752000	TRUE	90530495.97	70628278.86	100996067.5	114445656.9	68562878.39	124074038.4	70633665.31	97998749.19	101047169	90011323.97	174200822.4	72679626.8	95647320.83	88949983.68	110659150.2	144244591.9	90829769.27	89068056.21	114498946.3	118104031.8	86896284.86	100585458.1	104180026	102231855.8	87534756.76
ILF2	B4DY09|Q12905	Interleukin enhancer-binding factor 2 OS=Homo sapiens GN=ILF2 PE=1 SV=1|Interleukin enhancer-binding factor 2 OS=Homo sapiens GN=ILF2 PE=1 SV=2	1	8	2	7	7.58944	54525300	46497800	51541300	72701200	43779600	46205500	32367300	58868800	79285300	68867800	117293000	52389600	80730900	66059500	81087600	107598000	TRUE	54430928.88	46578416.84	51452093.52	72827247.71	43703827.29	46285610.06	32311279.43	58970865.4	79148074.85	68987201.44	117089992	52480431.91	80591172.84	66174032.48	80947255.47	107784551	54610865.19	58739206.39	58331087.91	75155246.7	55390034.88	37523234.92	47657019.03	61518142.38	68564092.9
ALDH7A1	P49419|P49419-2	Alpha-aminoadipic semialdehyde dehydrogenase OS=Homo sapiens GN=ALDH7A1 PE=1 SV=5|Isoform 2 of Alpha-aminoadipic semialdehyde dehydrogenase OS=Homo sapiens GN=ALDH7A1	1	8	2	12	7.23194	84745000	67867400	88844700	90714300	74041800	113163000	58839100	92948200	98694300	88390500	131977000	64923100	73069400	67305900	100498000	114808000	TRUE	84277253.58	68244070.24	88354325.46	91217772.61	73633129.44	113791064.9	58514340.09	93464070.96	98149561.01	88881075.31	131248558.6	65283429.11	72666096.56	67679453.87	99943305.57	115445194.8	84555855.07	86061373.47	100167040.3	94133643.94	93322298.32	92249164.62	86304815.79	97501299.76	85024627.98
PSAT1	Q9Y617|Q9Y617-2	Phosphoserine aminotransferase OS=Homo sapiens GN=PSAT1 PE=1 SV=2|Isoform 2 of Phosphoserine aminotransferase OS=Homo sapiens GN=PSAT1	1	8	2	8	7.00915	62776300	29104400	40618100	24488900	31289600	74134700	35072600	30730900	65787900	38658100	59688700	19835500	43846300	72067200	42821600	33050200	TRUE	55609103.53	32855529.57	35980714.51	27645159.43	27717253.26	83689573.68	31068346.57	34691661.53	58276867.9	43640561.15	52874016.12	22392004.54	38840349.56	81355603.31	37932639.99	37309885.22	55792934.62	41433519.29	40791230.79	28528865.81	35128722.59	67846216.78	45823774.54	36190185.76	50483863.22
SSB	P05455	Lupus La protein OS=Homo sapiens GN=SSB PE=1 SV=2	1	8	2	7	7.26889	46423800	31983900	30456900	19700000	30910400	58251800	23978100	27409800	54769600	36260700	43715100	18510900	48634000	56836100	39761200	32594200	TRUE	42652892.84	34811570.28	27982950.38	21441660.79	28399613.54	63401793.7	22030409.61	29833077.86	50320781.15	39466478.65	40164214.82	20147433.44	44683562.97	61860932.83	36531481.76	35475826.4	42793893.64	43900247.16	31724188.99	22127065.86	35993542.95	51399136.72	32493410	31121733.06	43591694.68
MAP1B	P46821	Microtubule-associated protein 1B OS=Homo sapiens GN=MAP1B PE=1 SV=2	1	8	2	11	6.99663	85147600	43927200	54748100	40688100	45276800	125630000	41409000	39968400	84398800	83243700	89756600	30440000	70235600	83587000	72050200	58581500	TRUE	79482654.45	47058011.35	51105660.22	43588051.86	42264494.23	134583992.7	38654022.4	42817056.87	78783672.78	89176705.53	83785013.58	32609541.82	65562763.07	89544473.46	67256636.12	62756763.27	79745406.08	59344014.43	57938337.49	44981389.44	53565830.61	109105762.4	57012149.12	44666561.75	68248420.06
MCM2	H0Y8E6|P49736	DNA helicase (Fragment) OS=Homo sapiens GN=MCM2 PE=1 SV=1|DNA replication licensing factor MCM2 OS=Homo sapiens GN=MCM2 PE=1 SV=4	1	8	2	13	6.96401	65772900	60143900	50398500	57324500	56637700	74884900	40524100	57434200	79774000	91864100	90417000	51952400	148301000	93647800	94109300	157774000	TRUE	67065255.41	58984919.92	51388767.64	56219850.1	57750560.13	73441859.11	41320348	56327436.16	81341459.56	90093867.91	92193581.23	50951271.1	151214929.6	91843195.8	95958430.32	154733676.3	67286957.94	74384825	58259295.55	58016976.29	73192801.15	59538507.3	60944804.59	58760528.85	70464169.85
SEC23A	F5H365|Q15436	Protein transport protein Sec23A OS=Homo sapiens GN=SEC23A PE=1 SV=1|Protein transport protein Sec23A OS=Homo sapiens GN=SEC23A PE=1 SV=2	1	8	2	2	6.38469	10333300	8448350	8909620	8779030	7407190	13313000	6685060	8245810	12470300	10911800	13250400	7712360	12695400	12085000	10128600	13340200	TRUE	10418504.7	8379257.638	8983085.541	8707233.268	7468267.04	13204123.52	6740182.614	8178374.052	12573125.63	10822561.03	13359658.06	7649286.717	12800081.73	11986166.36	10212116.81	13231101.07	10452945.91	10566931.58	10184097.8	8985569.069	9465248.184	10704437.69	9941327.511	8531643.142	10891799.4
PPL	K7EKI8|O60437	Periplakin OS=Homo sapiens GN=PPL PE=1 SV=1|Periplakin OS=Homo sapiens GN=PPL PE=1 SV=4	1	8	2	3	6.1568	10440300	7274820	10883900	12035000	7661500	15138500	9215550	10427800	11277800	11732800	20169200	8371950	10980800	12393400	11555300	14717700	TRUE	10484176.82	7244374.506	10929641.11	11984632.91	7693698.523	15075144.6	9254279.634	10384159.12	11325196.53	11683697.63	20253963.88	8336912.96	11026948.34	12341532.99	11603862.76	14656105.67	10518835.13	9135750.808	12390902.15	12367734.21	9750959.034	12221253.9	13649455.81	10832708.24	9810748.124
MIA3	Q5JRA6|Q5JRA6-2	Melanoma inhibitory activity protein 3 OS=Homo sapiens GN=MIA3 PE=1 SV=1|Isoform 2 of Melanoma inhibitory activity protein 3 OS=Homo sapiens GN=MIA3	1	8	2	2	5.99954	6703170	5427030	8659960	8894800	6031170	10338800	6697550	9194130	9714770	7301670	13275200	6654060	8534920	7352080	9023180	10500200	TRUE	6577651.075	5530592.042	8497799.578	9064536.236	5918234.482	10536091.56	6572136.311	9369578.242	9532857.936	7441005.116	13026617.79	6781037.009	8375100.991	7492377.071	8854218.172	10700571.5	6599395.298	6974530.468	9633930.524	9354293.6	7500743.864	8541493.531	9693470.229	9774302.012	8258087.873
ATP5A1	P25705	ATP synthase subunit alpha, mitochondrial OS=Homo sapiens GN=ATP5A1 PE=1 SV=1	1	8	2	10	7.48279	54499400	44136100	63213600	64029700	49553900	62657000	45220100	67221000	68332000	66272100	114584000	51250200	73745200	68844000	81135600	95247700	TRUE	53451508.72	45001367.14	61998155.79	65284971.66	48601098.69	63885360.53	44350627.16	68538835.57	67018141.38	67571332.84	112380827.6	52254935.67	72327258.67	70193653.71	79575559.2	97114985.62	53628207.29	56750417.29	70287127.87	67371873.93	61596814.72	51791159.03	65414267.7	71499405.96	58056220.32
PARN	O95453|O95453-2	Poly(A)-specific ribonuclease PARN OS=Homo sapiens GN=PARN PE=1 SV=1|Isoform 2 of Poly(A)-specific ribonuclease PARN OS=Homo sapiens GN=PARN	1	8	2	3	6.47745	15989700	15484700	22941600	23954000	17027600	22103300	14573200	24331700	20058300	22889800	29920800	16670000	20580400	17771100	21184100	26525000	TRUE	16404479.37	15093176.81	23536714.5	23348334.64	17469302.92	21544428.7	14951234.78	23716484.67	20578620.52	22311042.42	30696957.81	16248507.07	21114264	17321766.29	21733624.23	25854328.14	16458708.86	19033734.68	26683504.38	24094688.53	22140516.24	17465831.35	22052091.18	24740930.47	17826769.02
CNDP2	Q96KP4|Q96KP4-2	Cytosolic non-specific dipeptidase OS=Homo sapiens GN=CNDP2 PE=1 SV=2|Isoform 2 of Cytosolic non-specific dipeptidase OS=Homo sapiens GN=CNDP2	1	8	2	2	5.79499	7675790	5039520	4407580	3039160	5140610	9777190	3050470	4811400	9241370	12407300	8258990	3213280	6434490	9011650	7009180	5661430	TRUE	7570948.394	5109306.682	4347378.019	3081245.931	5070395.754	9912583.381	3008804.429	4878027.703	9115144.547	12579114.84	8146182.618	3257777.125	6346602.986	9136442.273	6913443.446	5739828.819	7595976.233	6443255.054	4928609.743	3179741.174	6426196.86	8036022.306	4437789.294	5088736.628	7896232.71
PMPCA	Q10713	Mitochondrial-processing peptidase subunit alpha OS=Homo sapiens GN=PMPCA PE=1 SV=2	1	8	2	3	6.60641	10406500	8293570	9704000	11292100	7692000	10080700	7418280	10331600	12398500	12131100	17826700	8026360	10364800	10334900	13070200	15059100	TRUE	10306371.08	8374144.068	9610630.367	11401805.52	7617989.364	10178636.47	7346903.034	10431974.03	12279204.51	12248956.61	17655175.64	8104338.057	10265072.3	10435306.09	12944441.57	15205402.85	10340441.6	10560482.95	10895543.53	11766276.14	9655005.586	8251708.622	10836200.36	10882588.53	10637182.53
TBC1D15	Q8TC07|Q8TC07-2|Q8TC07-3	TBC1 domain family member 15 OS=Homo sapiens GN=TBC1D15 PE=1 SV=2|Isoform 2 of TBC1 domain family member 15 OS=Homo sapiens GN=TBC1D15|Isoform 3 of TBC1 domain family member 15 OS=Homo sapiens GN=TBC1D15	1	8	2	3	6.02039	13523200	9016490	9281820	9908520	9507130	14229300	8368730	10157500	15413600	12987400	14924100	6110060	14280100	15587700	13001500	12010500	TRUE	12864451.66	9478196.255	8829679.715	10415904.32	9044014.311	14957937.95	7961068.575	10677633.81	14662765.63	13652444.14	14197110.38	6422937.064	13584481.2	16385897.37	12368164.95	12625520.14	12906978.62	11952783.37	10010182.06	10748859.58	11462343.21	12126235.76	11742054.27	11138859.71	12702004.78
PSMB5	P28074	Proteasome subunit beta type-5 OS=Homo sapiens GN=PSMB5 PE=1 SV=3	1	8	2	3	6.6271	14961200	10127600	11022800	9819070	11401000	16885000	9346380	10979700	15822100	15330800	15969500	6254380	16133300	17088900	12525500	13164100	TRUE	14219332.17	10655989.13	10476222.14	10331362.14	10835668.67	17765944.21	8882929.299	11552545.9	15037543.48	16130656.64	15177634.49	6580690.916	15333312.28	17980482.32	11904409.08	13850913.01	14266338.06	13438076.85	11876862.39	10661614.92	13733077.92	14402655.54	13101738.4	12051564.09	13026665.91
TXNDC12	O95881	Thioredoxin domain-containing protein 12 OS=Homo sapiens GN=TXNDC12 PE=1 SV=1	1	8	2	3	6.51044	17604200	12022500	14758500	15683400	13802900	18335600	11067800	16328700	17904000	18066600	23399100	10794400	17280300	16674100	17689000	17673000	TRUE	17117083.04	12364635.61	14350124.97	16129717.3	13420966.9	18857393.45	10761548.47	16793381.21	17408587.42	18580738.26	22751635.27	11101586.41	16802145.51	17148610.58	17199536.58	18175937.22	17173668.23	15592820.29	16268694.7	16645320.55	17009673.31	15287481.43	15872578.54	17518779.98	15080644.82
EIF3E	P60228	Eukaryotic translation initiation factor 3 subunit E OS=Homo sapiens GN=EIF3E PE=1 SV=1	1	8	2	4	6.73429	20444500	17823900	14480200	23283300	19583300	23756300	14700800	19862400	22816200	26090300	29445200	13925100	27707300	23503600	22346100	25907000	TRUE	20702244.5	17601991.11	14662752.37	22993421.17	19830187.32	23460532.28	14886133.48	19615111.63	23103844.6	25765473.81	29816416.63	13751731.46	28056606.86	23210978.42	22627818.03	25584455.91	20770681.42	22197555.41	16623119.47	23728429.88	25132690.56	19019195.45	21956071.04	20462396.5	20014310.52
MAPK1	P28482	Mitogen-activated protein kinase 1 OS=Homo sapiens GN=MAPK1 PE=1 SV=3	1	8	2	2	6.85372	27138800	17606100	16723000	14181800	19635100	31706900	16220900	18173700	28172100	21677100	26144400	10722700	26743900	29705500	18945600	17684400	TRUE	25301100.33	18884887.24	15590604.62	15211869.4	18305512.22	34009873.35	15122504.25	19493713.84	26264430.58	23251576.96	24374035.97	11501523.93	24932940.92	31863105.28	17662701.61	18968874.42	25384740.03	23815392.72	17675022.86	15698132.68	23200324.17	27571430.21	22304702.43	20335754.87	22752250.91
POLR2G	P62487	DNA-directed RNA polymerase II subunit RPB7 OS=Homo sapiens GN=POLR2G PE=1 SV=1	1	8	2	3	5.91936	13193600	10234000	10887000	13689600	9737850	12221300	6986100	12836200	15355700	15220500	20261000	9090710	15482100	13642300	14868700	17689700	TRUE	13232813.51	10203673.04	10919357.92	13649032.87	9766792.461	12185083.97	7006863.816	12798161.8	15401339.62	15175396.28	20321218.96	9063771.011	15528115.3	13601873.04	14912892.17	17637279.16	13276558.19	12867669.13	12379244.13	14085338.46	12378389	9878313.532	10334664.8	13350985.01	13341813.84
CALM1	P62158	Calmodulin OS=Homo sapiens GN=CALM1 PE=1 SV=2	1	8	2	6	7.79123	48040700	27650400	38177100	36667800	29010100	56894700	27189300	36676400	46705600	47998600	56590600	23188900	39630100	40689800	47963400	46230600	TRUE	46576770.22	28519465.07	37013740.73	37820286.19	28126083.96	58682927.16	26360768.65	37829156.49	45282354.32	49507218.55	54866131.7	23917738.02	38422463.9	41968699.54	46501825.76	47683649.48	46730742.47	35965386.08	41962369.6	39029251.12	35646872.79	47573603.52	38880405.71	39463206.43	39227025.48
NAGA	P17050	Alpha-N-acetylgalactosaminidase OS=Homo sapiens GN=NAGA PE=1 SV=2	1	8	2	2	6.34592	10684300	7874840	10025600	10995200	7822480	11633700	6921680	9504470	13141200	10929600	17046700	7875090	11849800	11312500	12349400	13770400	TRUE	10425196.68	8070557.86	9782470.714	11268469.93	7632778.239	11922838.94	6753823.401	9740689.977	12822514.78	11201239.54	16633303.1	8070814.073	11562432.32	11593655.97	12049916.6	14112643.55	10459660.02	10177635.82	11090358.43	11628678.34	9673748.939	9665714.372	9961446.777	10161444.11	11107839.27
DLG1	A0A0C4DFT3|E7EQD7|Q12959|Q12959-2|Q12959-3|Q12959-4|Q12959-5|Q12959-6|Q12959-7|Q12959-8|Q12959-9	Disks large homolog 1 OS=Homo sapiens GN=DLG1 PE=1 SV=1|Disks large homolog 1 OS=Homo sapiens GN=DLG1 PE=1 SV=1|Disks large homolog 1 OS=Homo sapiens GN=DLG1 PE=1 SV=2|Isoform 2 of Disks large homolog 1 OS=Homo sapiens GN=DLG1|Isoform 3 of Disks large homolog 1 OS=Homo sapiens GN=DLG1|Isoform 4 of Disks large homolog 1 OS=Homo sapiens GN=DLG1|Isoform 5 of Disks large homolog 1 OS=Homo sapiens GN=…	1	8	2	3	6.36337	19875100	13900100	20849700	22886000	13194900	23979700	13863200	17463800	21966600	21156400	35139800	15805200	21233200	20127200	22650200	24431300	TRUE	19566366.18	14119426.93	20525827.04	23247113.66	12989934.4	24358070.94	13647853.23	17739357.84	21625377.45	21490222.65	34593948.93	16054587.12	20903369.87	20444783.1	22298358.61	24816796.65	19631048.15	17805756.16	23270070.07	23990231.92	16463384.65	19746820.16	20129688.84	18505618.56	18733549.63
CAPRIN1	A0A087X082|E9PLA9|Q14444|Q14444-2	Caprin-1 OS=Homo sapiens GN=CAPRIN1 PE=1 SV=1|Caprin-1 (Fragment) OS=Homo sapiens GN=CAPRIN1 PE=1 SV=1|Caprin-1 OS=Homo sapiens GN=CAPRIN1 PE=1 SV=2|Isoform 2 of Caprin-1 OS=Homo sapiens GN=CAPRIN1	1	8	2	4	6.901	48603200	45057600	40111000	53328400	40868200	56940500	29786800	45811400	57644200	52264500	78630200	40559300	65829600	48822100	54905600	66505300	TRUE	48920179.48	44765648.2	40372595.2	52982857.35	41134733.49	56571552.66	29981063.02	45514563.93	58020142.91	51925850.92	79143009.03	40296495.04	66258926.31	48505756.03	55263682.36	66074377.31	49081898.5	56453156.36	45770293.08	54676509.7	52133976.92	45861935.44	44220102.58	47480589.02	50261468.47
CD2BP2	O95400	CD2 antigen cytoplasmic tail-binding protein 2 OS=Homo sapiens GN=CD2BP2 PE=1 SV=1	1	8	2	2	6.79664	10447500	7595520	9643770	10263000	7360030	14666300	7470270	10040400	10661400	9593440	15393900	6736910	10368600	9762500	12054900	12064800	TRUE	10277346.58	7721272.66	9486706.549	10432915.89	7240160.726	14909117.64	7348605.3	10206630.49	10487762.9	9752270.547	15143186.94	6848447.373	10199731.59	9924129.532	11858567.63	12264546.78	10311321.16	9737158.52	10755051.46	10766414.94	9176147.263	12086657.67	10838711.09	10647511.16	9085299.308
CDC5L	Q99459	Cell division cycle 5-like protein OS=Homo sapiens GN=CDC5L PE=1 SV=2	1	8	2	3	6.2389	12189800	10559900	15465800	17147600	13051100	15864800	11203800	18233400	16355700	17832800	24614900	12233300	16992400	13172100	15240200	23471400	TRUE	12348049.58	10424566.9	15666579.05	16927840.55	13220531.09	15661480.6	11349249.2	17999725.2	16568031.85	17604259.19	24934453.87	12076521.02	17212997.57	13003289.59	15438050.28	23170596.28	12388869.44	13146234.42	17761154.84	17468956.65	16755641.87	12696590.04	16739398.59	18777232.63	14352491.54
HADHA	P40939	Trifunctional enzyme subunit alpha, mitochondrial OS=Homo sapiens GN=HADHA PE=1 SV=2	1	8	2	11	7.16581	58367400	38941800	66702400	65207300	46597500	63942400	53668600	75525000	59553700	58501500	121345000	50600500	55537300	58151900	62304500	75084900	TRUE	56822507.34	40000551.25	64936893.09	66980158.74	45364137.96	65680868.59	52248077.14	77578376.79	57977407.86	60092041.18	118133190	51976228.47	54067315.61	59732936.24	60655398.54	77126311.33	57010349.67	50443978.03	73618765.75	69121249.44	57494305.19	53246757.66	77062488.72	80929414.83	50224448.12
ERP44	Q9BS26	Endoplasmic reticulum resident protein 44 OS=Homo sapiens GN=ERP44 PE=1 SV=1	1	8	2	10	7.18227	81596000	50851900	98050600	83085700	49459800	112666000	65544500	70938800	94144300	72140300	166377000	59116200	73462400	79806100	112985000	109289000	TRUE	76712168.2	54089354.14	92181897.63	88375298.68	46499442.33	119838809.8	61621411.69	75455073.96	88509404.59	76733066.7	156418702	62879795.59	69065395.18	84886905.02	106222416.8	116246815.3	76965761.23	68211114.76	104506347.7	91200307.36	58933184.86	97152004.87	90887542.72	78714394.83	76673589.98
EIF4E	D6RBW1|P06730|P06730-2|P06730-3	Eukaryotic translation initiation factor 4E OS=Homo sapiens GN=EIF4E PE=1 SV=1|Eukaryotic translation initiation factor 4E OS=Homo sapiens GN=EIF4E PE=1 SV=2|Isoform 2 of Eukaryotic translation initiation factor 4E OS=Homo sapiens GN=EIF4E|Isoform 3 of Eukaryotic translation initiation factor 4E OS=Homo sapiens GN=EIF4E	1	8	2	3	6.76676	13717900	12109900	11291300	12963800	11372700	17222700	8653030	11305500	14878000	12497100	18167900	9315500	17596100	16563800	13347100	16519800	TRUE	13723286.73	12105146.57	11295733.85	12958711.39	11377165.82	17215939.67	8656427.861	11301062.31	14883842.28	12492194.58	18175034.15	9311843.437	17603009.62	16557298.3	13352341.12	16513315.57	13768652.8	15265583.31	12805940.43	13372950.13	14419368.98	13956772.91	12767663.63	11789217.53	12893518.21
GOLIM4	F8W785|O00461	Golgi integral membrane protein 4 OS=Homo sapiens GN=GOLIM4 PE=1 SV=1|Golgi integral membrane protein 4 OS=Homo sapiens GN=GOLIM4 PE=1 SV=1	1	8	2	4	6.68941	12456800	10364400	13662600	16908200	9566400	19062100	9571830	10253100	11680800	11509000	20466700	12412700	11367700	9236200	15552700	16120400	TRUE	12535492.04	10299337.07	13748909.32	16802058.11	9626832.821	18942436.92	9632297.123	10188735.76	11754589.9	11436751.8	20595992.15	12334778.79	11439511.99	9178219.392	15650949.45	16019203.56	12576931.54	12988309.33	15587098.27	17339153.44	12201004.78	15356425.24	14207006.82	10628843.46	10182721.38
MANBA	O00462	Beta-mannosidase OS=Homo sapiens GN=MANBA PE=2 SV=3	1	8	2	3	6.13283	18335900	12080200	19795200	16795600	12565200	21924500	14367700	17364900	24413700	17256400	37312400	13151900	18061600	20966300	25301300	23815700	TRUE	17078576.12	12969543.69	18437809.44	18032091.19	11703582.85	23538580.54	13382482.35	18643303.03	22739611.03	18526815.26	34753825.21	14120142.19	16823085.34	22509837.9	23566346.79	25569010.58	17135034.02	16355659.02	20902890.63	18608505.81	14833068.46	19082468.31	19738284.2	19448610.13	19698783.66
INTS1	Q8N201	Integrator complex subunit 1 OS=Homo sapiens GN=INTS1 PE=1 SV=2	1	8	2	2	5.65879	3172360	3690750	3333750	4885080	3410190	2434850	2114820	4280380	4650760	5100960	5284060	3480690	5986320	4635080	4500490	6174990	TRUE	3301220.327	3546684.714	3469165.941	4694395.058	3548710.911	2339807.702	2200723.364	4113299.008	4839672.499	4901848.366	5498696.958	3344824.227	6229482.552	4454153.595	4683298.576	5933954.519	3312133.413	4472660.505	3932983.279	4844456.297	4497620.308	1896856.365	3245922.696	4290975.083	4192493.064
CNBP	P62633|P62633-2|P62633-3|P62633-7	Cellular nucleic acid-binding protein OS=Homo sapiens GN=CNBP PE=1 SV=1|Isoform 2 of Cellular nucleic acid-binding protein OS=Homo sapiens GN=CNBP|Isoform 3 of Cellular nucleic acid-binding protein OS=Homo sapiens GN=CNBP|Isoform 7 of Cellular nucleic acid-binding protein OS=Homo sapiens GN=CNBP	1	8	2	4	7.08175	25609000	21382700	20473200	17611600	19698300	39258400	13307100	17356200	24183300	20008200	26509700	10619600	25366600	27847300	19092600	23274900	TRUE	25308925.75	21636223.11	20233304.65	17820411.22	19467484.56	39723865.62	13151173.64	17561983.08	23899931.43	20245426.41	26199071.77	10745510.86	25069366.08	28177470.38	18868881.87	23550857.91	25392591.32	27285053.06	22938438.29	18390059.27	24673002.7	32203700.89	19397119.02	18320582.01	20703941.6
NASP	P49321	Nuclear autoantigenic sperm protein OS=Homo sapiens GN=NASP PE=1 SV=2	1	8	2	4	7.37394	52314300	35229600	32682900	23722300	41616500	80740900	30533400	34179700	51008600	34322400	49885400	18383300	48661200	52242500	40386000	34761800	TRUE	47890349.64	38483992.64	29919075.82	25913686.75	38097207.38	88199474.35	27951347.94	37337106.39	46695065.95	37492988.54	45666849.18	20081487.78	44546173.45	57068487.46	36970764.41	37972978.84	48048664.28	48531473.16	33919168.74	26742044.8	48284229.93	71502343.64	41226405.9	38949901.98	40450823.93
GDI1	P31150	Rab GDP dissociation inhibitor alpha OS=Homo sapiens GN=GDI1 PE=1 SV=2	1	8	2	2	6.79326	25731900	15727800	15317300	9630200	14251800	32799900	13262800	15589100	28032700	18629900	24716000	8128960	20516900	26608800	18060400	15138900	TRUE	23578539.51	17164174.94	14035479.82	10509698.59	13059145.63	35795420.94	12152909.57	17012807.86	25686798.27	20331315.42	22647654.56	8871354.639	18799954.03	29038905.51	16549024.94	16521492.39	23656484.81	21645433.28	15911982.42	10845652.08	16551102.65	29018954	17924744.95	17747684.88	22251861.8
MAT2A	P31153	S-adenosylmethionine synthase isoform type-2 OS=Homo sapiens GN=MAT2A PE=1 SV=1	1	8	2	6	6.56937	30363200	16720700	23295100	14688000	20134400	40045000	18755800	19414000	36074600	20673100	37797400	11702300	27512500	32553900	26168500	20722300	TRUE	26578548.52	19101643.49	20391458.93	16779497.24	17624727.54	45747206.36	16417964.52	22178455.85	31578045.35	23616845.35	33086105.21	13368648.6	24083176.88	37189411.44	22906701.1	23673051.18	26666411.18	24088740.14	23117737.33	17315871.39	22337500.72	37086756.97	24215421.41	23136465.7	27355308.88
GART	P22102	Trifunctional purine biosynthetic protein adenosine-3 OS=Homo sapiens GN=GART PE=1 SV=1	1	8	2	8	6.95953	52939300	36493000	35603000	28858500	41360900	70425700	32756800	39160200	54216000	43406700	52674300	21352500	50781500	55672200	36323500	35458400	TRUE	49953809.6	38674004.85	33595183.22	30583228.81	39028368.78	74634693.33	30909493.52	41500610.11	51158510.62	46000902.27	49703754.17	22628632.58	47917697.86	58999450.11	34275050.92	37577571.96	50118945.57	48771094.15	38086760.95	31560853.65	49464379.72	60505524.88	45589476.71	43293250.39	44317399.78
PRDX3	P30048|P30048-2	Thioredoxin-dependent peroxide reductase, mitochondrial OS=Homo sapiens GN=PRDX3 PE=1 SV=3|Isoform 2 of Thioredoxin-dependent peroxide reductase, mitochondrial OS=Homo sapiens GN=PRDX3	1	8	2	6	8.12351	62397200	41502700	77031400	68135700	39221900	88338700	49615500	73230700	73522000	56974700	129953000	51903400	54115200	60944000	90823700	94813200	TRUE	61084650.82	42394484.34	75411014.78	69599757.76	38396852.2	90236867.32	48571818.81	74804235.97	71975436.36	58198937.1	127219388.5	53018668.14	52976865.89	62253526.96	88913188.42	96850487.37	61286582.83	53462924.13	85493246.86	71824586.68	48663998.43	73154035.71	71640248.68	78035443.56	62350606.94
RFC3	P40938|P40938-2	Replication factor C subunit 3 OS=Homo sapiens GN=RFC3 PE=1 SV=2|Isoform 2 of Replication factor C subunit 3 OS=Homo sapiens GN=RFC3	1	8	2	4	6.35666	19008200	16751400	19122000	21938000	17628200	22832800	15003100	20670600	22896200	27328600	30916300	14882200	23988400	24159600	22939300	30339400	TRUE	19395461.5	16416931.43	19511579.99	21499972.64	17987346.22	22376906.52	15308764.03	20257878.31	23362673.25	26782940.66	31546169.89	14585053	24477125.07	23677214.83	23406651.34	29733625.21	19459578.5	20703097.89	22120221.16	22187241.71	22797082.01	18140711.96	22579423.4	21132927.82	20238527.62
RPS2	H0YEN5|P15880	40S ribosomal protein S2 (Fragment) OS=Homo sapiens GN=RPS2 PE=1 SV=1|40S ribosomal protein S2 OS=Homo sapiens GN=RPS2 PE=1 SV=2	1	8	2	3	7.05886	29097700	12184600	19983600	20159500	19660600	28965700	14262700	14028800	20921100	14760000	28940500	10735200	24048800	23032200	16370400	37507200	TRUE	27257226.42	13007333.54	18719607.05	21520718	18417037.28	30921533.83	13360562.63	14976058.36	19597808.75	15756630.75	27109969.56	11460066.56	22527676.99	24587389.62	15334947.42	40039776.48	27347332.63	16403315.12	21222363.75	22208650.21	23341670.53	25067747.33	19705954.05	15622956.94	16977115.14
ISYNA1	Q9NPH2|Q9NPH2-2|Q9NPH2-3	Inositol-3-phosphate synthase 1 OS=Homo sapiens GN=ISYNA1 PE=1 SV=1|Isoform 2 of Inositol-3-phosphate synthase 1 OS=Homo sapiens GN=ISYNA1|Isoform 3 of Inositol-3-phosphate synthase 1 OS=Homo sapiens GN=ISYNA1	1	8	2	2	6.79442	7825410	6021350	5100260	4414200	6729030	9245350	5223170	5585010	8498850	7339260	7292530	3332010	8145960	8935150	5676270	4821130	TRUE	7340897.24	6418770.208	4784475.773	4705545.343	6312399.958	9855560.155	4899775.761	5953630.963	7972640.987	7823664.699	6841010.675	3551928.807	7641600.284	9524886.383	5324821.93	5139333.474	7365164.582	8094596.03	5424146.188	4855963.012	8000307.423	7989794.204	7226848.048	6210801.126	6906509.076
CYP3A5	P20815	Cytochrome P450 3A5 OS=Homo sapiens GN=CYP3A5 PE=1 SV=1	1	8	2	2	5.63933	6464580	4888730	7156710	6017040	6413430	8640250	5022270	10165300	10522100	8434930	16909300	8546650	8656260	8149810	9531470	11460500	TRUE	6372664.206	4959242.345	7054953.245	6103826.466	6322241.476	8764872.201	4950861.504	10311918.68	10372492.88	8556590.778	16668877.31	8669922.166	8533182.088	8267358.364	9395948.028	11625799.93	6393730.789	6254011.61	7998179.857	6298941.651	8012780.519	7105585.477	7302196.171	10757347.33	8985443.639
ACTR1A	P61163	Alpha-centractin OS=Homo sapiens GN=ACTR1A PE=1 SV=1	1	8	2	2	6.84716	14364600	8563440	10343800	8571640	11895700	16015100	9469680	11561000	13901900	11408000	15991700	6056270	14172600	16640700	10211900	11341600	TRUE	13400566.73	9179491.634	9649609.608	9188281.54	11097358.9	17167222.11	8834153.32	12392695.32	12968919.33	12228688.54	14918469.23	6491956.48	13221452.19	17837827.61	9526561.646	12157511.74	13444865.97	11576092.33	10939734.19	9481994.552	14064742.95	13917278.12	13029797.03	12928004.19	11234666.06
NUP155	E9PF10|O75694|O75694-2	Nuclear pore complex protein Nup155 OS=Homo sapiens GN=NUP155 PE=1 SV=1|Nuclear pore complex protein Nup155 OS=Homo sapiens GN=NUP155 PE=1 SV=1|Isoform 2 of Nuclear pore complex protein Nup155 OS=Homo sapiens GN=NUP155	1	8	2	8	6.75828	40409300	32992100	37469900	49811500	32940800	39750000	27036300	40176200	49365800	48941100	69477400	31190000	58628400	52155800	49674700	64777800	TRUE	40421544.27	32982106.22	37481253.61	49796411.38	32950781.27	39737959.15	27044492.17	40164030.05	49380758.15	48926275.03	69498452.09	31180552.1	58646164.77	52140001.25	49689751.75	64758177.87	40555168.73	41593142.83	42492387.58	51388205.65	41761672.54	32215126.36	39888853.08	41898936.06	42777375.13
PES1	B5MCF9|O00541|O00541-2	Pescadillo homolog OS=Homo sapiens GN=PES1 PE=1 SV=1|Pescadillo homolog OS=Homo sapiens GN=PES1 PE=1 SV=1|Isoform 2 of Pescadillo homolog OS=Homo sapiens GN=PES1	1	8	2	6	6.71815	32995800	21740700	37695800	38604800	25038100	36992900	25468600	34332200	34452300	32294900	61606400	37830400	39826200	29250800	46846500	45576900	TRUE	31795647.19	22561320.57	36324694.58	40061969.87	24127391.79	38389227.38	24542233.26	35628097.07	33199170.07	33513897.51	59365596.81	39258339.5	38377605.77	30354895.46	45142557.12	47297237.51	31900756.4	28451676.88	41181199.99	41342592.56	30578948.25	31121724.35	36198185.22	37167071.12	28759650.63
SYNCRIP	O60506|O60506-2	Heterogeneous nuclear ribonucleoprotein Q OS=Homo sapiens GN=SYNCRIP PE=1 SV=2|Isoform 2 of Heterogeneous nuclear ribonucleoprotein Q OS=Homo sapiens GN=SYNCRIP	1	8	2	8	7.0489	28784800	25612800	28030900	34927600	26395000	37462400	18754600	30538300	36080000	34440000	52718900	24176400	43350200	34654200	36011400	45336800	TRUE	29003662.66	25419524.91	28244030.44	34664035.1	26595692.03	37179707.42	18897198.93	30307856.92	36354331.06	34180114.55	53119743.45	23993964.04	43679809.37	34392698.19	36285209.46	44994686.92	29099542.19	32056107.13	32020174.7	35772107.17	33707260.91	30141179.82	27872129.63	31617020.44	31492891.48
HECTD1	A0A087X2H1|Q9ULT8	E3 ubiquitin-protein ligase HECTD1 OS=Homo sapiens GN=HECTD1 PE=1 SV=1|E3 ubiquitin-protein ligase HECTD1 OS=Homo sapiens GN=HECTD1 PE=1 SV=3	1	8	2	6	6.29016	18720300	17262100	15847300	15351000	17473400	25154700	12781100	17891500	24257800	23550600	25083700	11973500	25318800	21670100	20264700	22012200	TRUE	18425234.76	17538538.58	15597518.35	15596833.85	17197988.12	25557532.18	12579647.12	18178017.91	23875453.91	23927743.82	24688336.25	12165245.92	24919730.66	22017129.13	19945292.27	22364707.59	18486144.41	22117536.56	17682860.93	16095402.93	21796653.09	20719210.2	18554154.86	18963226.78	20682737.3
TNKS1BP1	Q9C0C2	182 kDa tankyrase-1-binding protein OS=Homo sapiens GN=TNKS1BP1 PE=1 SV=4	1	8	2	3	6.42828	18840300	12941900	17445400	17888300	15447900	26728200	12559400	16550300	21488900	18467100	28187700	12599500	22516800	21525200	19964400	24550000	TRUE	18465705.75	13204438.64	17098540	18251181.03	15140755.5	27270406.74	12309686.41	16886038.44	21061644.68	18841722.53	27627255.08	12855092.74	22069107.35	21961858.98	19567455.71	25048019.9	18526749.19	16651880.84	19384564.78	18834599.09	19189325.68	22107818.76	18155980.5	17615439.59	18245201.35
GFPT1	Q06210|Q06210-2	Glutamine--fructose-6-phosphate aminotransferase [isomerizing] 1 OS=Homo sapiens GN=GFPT1 PE=1 SV=3|Isoform 2 of Glutamine--fructose-6-phosphate aminotransferase [isomerizing] 1 OS=Homo sapiens GN=GFPT1	1	8	2	2	5.65303	5492340	3436180	2972580	1793780	3435460	4471500	2687840	3299860	5509750	4354780	4623510	1661600	5595380	6119850	4619100	4213260	TRUE	4918267.461	3837259.565	2661878.815	2003154.51	3076377.488	4993424.718	2406900.522	3685027.952	4933857.726	4863080.866	4140249.655	1855546.128	5010537.474	6834174.272	4136300.599	4705042.296	4934526.139	4839099.241	3017764.226	2067187.435	3898987.044	4048114.49	3550020.488	3844204.637	4274083.484
HNRNPA0	Q13151	Heterogeneous nuclear ribonucleoprotein A0 OS=Homo sapiens GN=HNRNPA0 PE=1 SV=1	1	8	2	2	6.26674	6501050	5719650	8157490	9062830	6528480	8750630	5072360	8282810	9108080	16018900	12515400	6188050	8851870	8572410	8899140	11842100	TRUE	6866224.247	5415455.321	8615709.098	8580831.161	6895195.033	8285235.25	5357282.473	7842295.855	9619695.24	15166948.54	13218409.79	5858943.869	9349093.519	8116493.728	9399018.75	11212288.07	6888922.427	6829333.614	9767604.202	8855126.386	8738939.29	6716749.077	7901640.457	8181047.874	8333312.962
CAT	P04040	Catalase OS=Homo sapiens GN=CAT PE=1 SV=3	1	8	2	4	6.79701	14156100	8014160	14387300	14770300	10095200	17096200	11355500	14853700	15779900	25665700	21692000	9151620	9167480	12152800	15311800	15546600	TRUE	14310173.13	7927874.061	14543889.48	14611272.83	10205074.83	16912130.59	11479091.77	14693774.89	15951646.36	25389365.49	21928092.87	9053087.388	9267257.647	12021954.63	15478451.62	15379214.65	14357479.32	9997699.844	16488364.96	15078337.42	12933866.11	13710478.24	16930907.86	15328480.08	13818531.46
FAT1	A0A087WVP1|Q14517	Protocadherin Fat 1 OS=Homo sapiens GN=FAT1 PE=1 SV=1|Protocadherin Fat 1 OS=Homo sapiens GN=FAT1 PE=1 SV=2	1	8	2	4	6.22237	18685900	14381100	18605000	21214400	15446300	24114700	13177900	19781500	22127100	21893800	35631800	16731000	22094300	20564600	23582300	31170300	TRUE	18875701.27	14236493.4	18793979.53	21001082.36	15603195.16	23872218.91	13311753.98	19582590.63	22351855.12	21673650.77	35993728.56	16562764.39	22318721.95	20357816.31	23821836.25	30856872.57	18938100.06	17953386.58	21306679.62	21672403.88	19775419.64	19352945.27	19633964.49	20428470.74	19362879.94
IQGAP1	P46940	Ras GTPase-activating-like protein IQGAP1 OS=Homo sapiens GN=IQGAP1 PE=1 SV=1	1	8	2	33	7.85161	264202000	253678000	215865000	241920000	228594000	330895000	171936000	249834000	299932000	282281000	360903000	175137000	446209000	341195000	321239000	388299000	TRUE	263450049.7	254402058.5	215250622.5	242610498.3	227943394.3	331839454.5	171446649.7	250547086.8	299078357.9	283086698.4	359875827.1	175636883.5	444939036.1	342168853.2	320324715.6	389407299.5	264320955.8	320821874.9	244029001.1	250365796.2	288894436.6	269018595.5	252872569.3	261369597.6	259084461
COPS6	E7EM64|Q7L5N1	COP9 signalosome complex subunit 6 OS=Homo sapiens GN=COPS6 PE=1 SV=1|COP9 signalosome complex subunit 6 OS=Homo sapiens GN=COPS6 PE=1 SV=1	1	8	2	3	6.69011	13418400	10027100	9682690	10844100	12132200	16691200	9629210	11658700	13629600	12527400	16419600	8407610	14672900	16074200	13417100	12259800	TRUE	13070390.99	10294079.09	9431567.409	11132832.34	11817548.85	17135615.78	9379474.424	11969121.67	13276113.47	12860951.47	15993754.24	8631468.953	14292355.27	16502187.69	13069124.7	12586226.42	13113598.74	12981678.59	10692540.38	11488704.94	14977508.47	13891655.22	13834109.91	12486134.06	11500781.03
CTNNA1	G3XAM7|P35221|P35221-2	Catenin (Cadherin-associated protein), alpha 1, 102kDa, isoform CRA_a OS=Homo sapiens GN=CTNNA1 PE=1 SV=1|Catenin alpha-1 OS=Homo sapiens GN=CTNNA1 PE=1 SV=1|Isoform 2 of Catenin alpha-1 OS=Homo sapiens GN=CTNNA1	1	8	2	10	7.05449	51055100	53827400	58129000	93844300	52714300	59941100	39872700	75038900	53778600	73057800	103162000	60622600	77520100	51951200	64013400	108148000	TRUE	55002455.52	49964374.56	62623278.32	87109385.85	56789937.56	55639313.29	42955481.6	69653591.04	57936524.55	67814668.44	111138031.6	56271904.15	83513612.79	48222823.61	68962634.22	100386553.7	55184281.17	63009176.97	70995827.45	89893928.3	71975312.41	45106179.24	63356519.45	72662313.87	50189031.88
PCBP2	F8VZX2|H3BRU6|Q15366|Q15366-2|Q15366-3|Q15366-4|Q15366-5|Q15366-6|Q15366-7|Q15366-8	Poly(rC)-binding protein 2 OS=Homo sapiens GN=PCBP2 PE=1 SV=1|Poly(rC)-binding protein 2 (Fragment) OS=Homo sapiens GN=PCBP2 PE=1 SV=1|Poly(rC)-binding protein 2 OS=Homo sapiens GN=PCBP2 PE=1 SV=1|Isoform 2 of Poly(rC)-binding protein 2 OS=Homo sapiens GN=PCBP2|Isoform 3 of Poly(rC)-binding protein 2 OS=Homo sapiens GN=PCBP2|Isoform 4 of Poly(rC)-binding protein 2 OS=Homo sapiens GN=PCBP2|Isoform…	1	8	2	2	6.8413	13301900	9784500	9202280	8832940	9454050	16192200	7701710	8926810	13854600	10985100	15825100	6723990	16028000	14575900	11605900	11516900	TRUE	12611293.6	10320308.5	8724517.165	9316640.172	8963215.802	17078900.23	7301853.573	9415650.582	13135298.59	11586654.49	15003494.42	7092202.07	15195860.28	15374090.11	11003346.32	12147576.37	12652983.68	13014756.02	9890959.589	9614456.301	11359939.55	13845676.54	10769755.36	9822364.47	11378796.45
SQRDL	Q9Y6N5	Sulfide:quinone oxidoreductase, mitochondrial OS=Homo sapiens GN=SQRDL PE=1 SV=1	1	8	2	4	6.19221	13927700	9263870	19846700	20071500	11907900	16442400	10735400	16770900	16203300	15679700	30141800	12408000	16404400	15402100	21135700	24193100	TRUE	13519372.5	9543667.962	19264841.3	20677722.32	11558788.3	16939012.11	10420663.25	17277433.84	15728257.24	16153276.17	29258113.11	12782760.56	15923461.46	15867291.78	20516050.84	24923807.59	13564064.48	12035348.56	21840494.23	21338707.3	14649556.5	13732270.78	15369795.18	18023741.52	13625014.8
HNRNPUL2-BSCL2|HNRNPUL2	H3BQZ7|Q1KMD3	HCG2044799 OS=Homo sapiens GN=HNRNPUL2-BSCL2 PE=4 SV=1|Heterogeneous nuclear ribonucleoprotein U-like protein 2 OS=Homo sapiens GN=HNRNPUL2 PE=1 SV=1	1	8	2	13	7.41073	84625800	65763800	88135700	105554000	60676300	96903800	54299600	80612900	86776600	71187200	163018000	66529300	91879600	84695100	99495500	120210000	TRUE	83600406.19	66570420.4	87067777.44	106848663.8	59941097.47	98092365.48	53641662.66	81601650.8	85725145.38	72060340.66	161042743.7	67345309.58	90766313.36	85733920.68	98289933.03	121684425.7	83876770.18	83950763.66	98708484.59	110264192.9	75969078.35	79522401.65	79117936.01	85126476.24	74261652.52
HSPD1	P10809	60 kDa heat shock protein, mitochondrial OS=Homo sapiens GN=HSPD1 PE=1 SV=2	1	8	2	20	8.38351	169760000	98109900	230917000	169937000	150781000	175277000	127978000	157083000	228071000	163024000	340933000	115393000	232851000	186020000	253025000	397214000	TRUE	152723240.8	109054368.8	207742652	188894008.3	135648933.6	194829702.2	115134395.1	174606104.1	205182270.6	181209841.4	306717675.9	128265453.1	209482559.8	206771117.7	227631939.2	441524474.5	153228109.2	137526509.3	235517236.9	194932202.5	171920850.7	157946296.4	169815685.3	182148304.9	177744516.1
HSPE1-MOB4	S4R3N1	Protein HSPE1-MOB4 OS=Homo sapiens GN=HSPE1-MOB4 PE=3 SV=1	1	8	2	2	6.74349	8133550	6883350	8073800	9144440	6836080	12042500	6570050	7148090	9493120	8505390	11649200	5538810	9942740	8195350	9801220	10592000	TRUE	7952177.257	7040345.001	7893759.642	9353005.795	6683639.973	12317164.56	6423542.265	7311123.173	9281429.752	8699380.384	11389430.61	5665138.819	9721023.526	8382269.011	9582659.327	10833581.65	7978465.352	8878452.857	8949132.215	9651984.389	8470815.354	9985389.816	9474303.752	7626930.913	8040281.624
MTHFD1L	A0A087WVM4|B7ZM99|Q6UB35	Monofunctional C1-tetrahydrofolate synthase, mitochondrial OS=Homo sapiens GN=MTHFD1L PE=1 SV=1|MTHFD1L protein OS=Homo sapiens GN=MTHFD1L PE=1 SV=1|Monofunctional C1-tetrahydrofolate synthase, mitochondrial OS=Homo sapiens GN=MTHFD1L PE=1 SV=1	1	8	2	8	6.58142	31954600	29095300	40829800	44388500	32476800	41575800	28407900	52281600	44364600	42679700	67188500	31906600	44954200	36783500	43549500	62531600	TRUE	32406264.13	28689782.62	41406911.15	43769832.79	32935845.19	40996334.95	28809433.09	51552922.27	44991673.98	42084849.29	68138179.7	31461899.97	45589607.72	36270827.9	44165052.9	61660062.32	32513391.89	36180170.5	46942894.05	45168981.19	41742742.62	33235277.78	42492025.24	53779777.36	38975216.02
[truncated: 804 more rows]
[truncated: 23 more columns]
